# Supplementary material for: Cross-species single-cell annotation with orthologous marker gene groups
Source: Research Square preprint supplement (doi:10.21203/rs.3.rs-3079082/v1), 2023-06-26
Supplement: Supplementary file 1 [file 07e62dad885b6073529eb8f2.xlsx]

## Sheet: Xylem
Table S3: Conserved OMGs across three species using marker genes identified by the Seurat function
Orthogroup	gene.x	cluster.x	avg_log2FC.x	rank.x	gene.y	cluster.y	avg_log2FC.y	rank.y	gene	cluster	avg_log2FC	rank
OG0000327	AT1G75840	Xylem	0.921269	158	Zm00001d015036	Xylem	0.886542	68	Os02g0312600	Xylem	2.95625	19
OG0001099	AT2G34410	Xylem	0.993816	134	Zm00001d039144	Xylem	0.676445	176	Os05g0582100	Xylem	1.20659	101
OG0001099	AT2G34410	Xylem	0.993816	134	Zm00001d039144	Xylem	0.676445	176	Os01g0631100	Xylem	1.57218	66
OG0001320	AT2G47500	Xylem	1.44617	54	Zm00001d028830	Xylem	0.82057	88	Os03g0301800	Xylem	1.41184	78
OG0001727	AT4G35350	Xylem	5.05762	1	Zm00001d035689	Xylem	3.47134	1	Os01g0971400	Xylem	5.02988	3
OG0001727	AT4G35350	Xylem	5.05762	1	Zm00001d035689	Xylem	3.47134	1	Os05g0108600	Xylem	5.05168	2
OG0001727	AT4G35350	Xylem	5.05762	1	Zm00001d011787	Xylem	1.74599	7	Os01g0971400	Xylem	5.02988	3
OG0001727	AT4G35350	Xylem	5.05762	1	Zm00001d011787	Xylem	1.74599	7	Os05g0108600	Xylem	5.05168	2
OG0001727	AT1G20850	Xylem	4.27247	2	Zm00001d011787	Xylem	1.74599	7	Os01g0971400	Xylem	5.02988	3
OG0001727	AT1G20850	Xylem	4.27247	2	Zm00001d011787	Xylem	1.74599	7	Os05g0108600	Xylem	5.05168	2
OG0001727	AT1G20850	Xylem	4.27247	2	Zm00001d035689	Xylem	3.47134	1	Os01g0971400	Xylem	5.02988	3
OG0001727	AT1G20850	Xylem	4.27247	2	Zm00001d035689	Xylem	3.47134	1	Os05g0108600	Xylem	5.05168	2
OG0003109	AT1G35780	Xylem	2.04712	21	Zm00001d006910	Xylem	0.722049	138	Os07g0623600	Xylem	2.0386	40
OG0003416	AT3G06035	Xylem	1.42731	57	Zm00001d007045	Xylem	0.895322	65	Os07g0645000	Xylem	1.1853	105
OG0003708	AT5G03170	Xylem	2.13164	19	Zm00001d039770	Xylem	1.08535	39	Os05g0163300	Xylem	2.48168	30
OG0003708	AT5G60490	Xylem	1.64667	35	Zm00001d039770	Xylem	1.08535	39	Os05g0163300	Xylem	2.48168	30
OG0004601	AT2G46225	Xylem	1.41373	59	Zm00001d009707	Xylem	0.776268	110	Os01g0622700	Xylem	1.11224	116
OG0006150	AT3G59690	Xylem	1.219	83	Zm00001d012167	Xylem	1.29373	23	Os01g0896200	Xylem	1.4667	73
OG0008357	AT2G28315	Xylem	2.55603	11	Zm00001d017282	Xylem	0.715923	143	Os02g0628200	Xylem	1.31154	87
OG0010741	AT1G79620	Xylem	1.46169	52	Zm00001d029012	Xylem	0.913295	63	Os03g0329700	Xylem	2.28179	36
OG0011478	AT2G04850	Xylem	1.17973	90	Zm00001d028170	Xylem	1.02872	47	Os03g0194300	Xylem	3.17964	16

## Sheet: Cortex
Orthogroup	gene.x	cluster.x	avg_log2FC.x	rank.x	gene.y	cluster.y	avg_log2FC.y	rank.y	gene	cluster	avg_log2FC	rank
OG0000101	AT1G75780	Cortex	2.18592	9	Zm00001d033457	Cortex	1.26392	28	Os01g0282800	Cortex	1.23372	57
OG0000101	AT1G75780	Cortex	2.18592	9	Zm00001d033457	Cortex	1.26392	28	Os03g0661300	Cortex	1.22346	60
OG0000101	AT1G75780	Cortex	2.18592	9	Zm00001d033457	Cortex	1.26392	28	Os05g0413200	Cortex	1.64251	33
OG0000101	AT1G75780	Cortex	2.18592	9	Zm00001d033457	Cortex	1.26392	28	Os01g0805900	Cortex	1.00217	110
OG0000101	AT1G20010	Cortex	1.53008	36	Zm00001d033457	Cortex	1.26392	28	Os01g0282800	Cortex	1.23372	57
OG0000101	AT1G20010	Cortex	1.53008	36	Zm00001d033457	Cortex	1.26392	28	Os03g0661300	Cortex	1.22346	60
OG0000101	AT1G20010	Cortex	1.53008	36	Zm00001d033457	Cortex	1.26392	28	Os05g0413200	Cortex	1.64251	33
OG0000101	AT1G20010	Cortex	1.53008	36	Zm00001d033457	Cortex	1.26392	28	Os01g0805900	Cortex	1.00217	110
OG0000292	AT2G37170	Cortex	1.05938	95	Zm00001d019565	Cortex	1.10266	45	Os04g0233400	Cortex	0.79722	189
OG0000292	AT2G37170	Cortex	1.05938	95	Zm00001d019565	Cortex	1.10266	45	Os07g0448800	Cortex	1.07653	94
OG0000292	AT2G37170	Cortex	1.05938	95	Zm00001d017288	Cortex	1.06906	50	Os04g0233400	Cortex	0.79722	189
OG0000292	AT2G37170	Cortex	1.05938	95	Zm00001d017288	Cortex	1.06906	50	Os07g0448800	Cortex	1.07653	94
OG0000292	AT5G60660	Cortex	1.41207	50	Zm00001d017288	Cortex	1.06906	50	Os04g0233400	Cortex	0.79722	189
OG0000292	AT5G60660	Cortex	1.41207	50	Zm00001d017288	Cortex	1.06906	50	Os07g0448800	Cortex	1.07653	94
OG0000292	AT5G60660	Cortex	1.41207	50	Zm00001d019565	Cortex	1.10266	45	Os04g0233400	Cortex	0.79722	189
OG0000292	AT5G60660	Cortex	1.41207	50	Zm00001d019565	Cortex	1.10266	45	Os07g0448800	Cortex	1.07653	94
OG0000292	AT3G53420	Cortex	1.10517	85	Zm00001d019565	Cortex	1.10266	45	Os04g0233400	Cortex	0.79722	189
OG0000292	AT3G53420	Cortex	1.10517	85	Zm00001d019565	Cortex	1.10266	45	Os07g0448800	Cortex	1.07653	94
OG0000292	AT3G53420	Cortex	1.10517	85	Zm00001d017288	Cortex	1.06906	50	Os04g0233400	Cortex	0.79722	189
OG0000292	AT3G53420	Cortex	1.10517	85	Zm00001d017288	Cortex	1.06906	50	Os07g0448800	Cortex	1.07653	94
OG0000416	AT3G61430	Cortex	1.30363	62	Zm00001d002690	Cortex	1.06059	51	Os02g0666200	Cortex	0.792764	193
OG0000416	AT1G01620	Cortex	0.776796	189	Zm00001d002690	Cortex	1.06059	51	Os02g0666200	Cortex	0.792764	193
OG0000416	AT1G01620	Cortex	0.776796	189	Zm00001d017526	Cortex	1.00057	64	Os02g0666200	Cortex	0.792764	193
OG0000416	AT4G23400	Cortex	1.76301	17	Zm00001d002690	Cortex	1.06059	51	Os02g0666200	Cortex	0.792764	193
OG0000416	AT4G00430	Cortex	1.30684	61	Zm00001d002690	Cortex	1.06059	51	Os02g0666200	Cortex	0.792764	193
OG0000416	AT4G00430	Cortex	1.30684	61	Zm00001d017526	Cortex	1.00057	64	Os02g0666200	Cortex	0.792764	193
OG0000416	AT3G61430	Cortex	1.30363	62	Zm00001d017526	Cortex	1.00057	64	Os02g0666200	Cortex	0.792764	193
OG0000416	AT4G23400	Cortex	1.76301	17	Zm00001d017526	Cortex	1.00057	64	Os02g0666200	Cortex	0.792764	193
OG0000499	AT4G12510	Cortex	1.62941	25	Zm00001d051384	Cortex	0.730557	190	Os04g0554500	Cortex	3.52316	2
OG0000499	AT4G12510	Cortex	1.62941	25	Zm00001d051384	Cortex	0.730557	190	Os04g0554600	Cortex	2.34678	14
OG0000499	AT4G12510	Cortex	1.62941	25	Zm00001d051384	Cortex	0.730557	190	Os02g0662000	Cortex	2.44182	11
OG0000499	AT1G62510	Cortex	1.65659	24	Zm00001d026163	Cortex	1.92558	4	Os04g0554500	Cortex	3.52316	2
OG0000499	AT1G62510	Cortex	1.65659	24	Zm00001d026163	Cortex	1.92558	4	Os04g0554600	Cortex	2.34678	14
OG0000499	AT1G62510	Cortex	1.65659	24	Zm00001d026163	Cortex	1.92558	4	Os02g0662000	Cortex	2.44182	11
OG0000499	AT1G62510	Cortex	1.65659	24	Zm00001d051384	Cortex	0.730557	190	Os04g0554500	Cortex	3.52316	2
OG0000499	AT1G62510	Cortex	1.65659	24	Zm00001d051384	Cortex	0.730557	190	Os04g0554600	Cortex	2.34678	14
OG0000499	AT1G62510	Cortex	1.65659	24	Zm00001d051384	Cortex	0.730557	190	Os02g0662000	Cortex	2.44182	11
OG0000499	AT1G62510	Cortex	1.65659	24	Zm00001d026162	Cortex	1.92	6	Os04g0554500	Cortex	3.52316	2
OG0000499	AT1G62510	Cortex	1.65659	24	Zm00001d026162	Cortex	1.92	6	Os04g0554600	Cortex	2.34678	14
OG0000499	AT1G62510	Cortex	1.65659	24	Zm00001d026162	Cortex	1.92	6	Os02g0662000	Cortex	2.44182	11
OG0000499	AT1G62510	Cortex	1.65659	24	Zm00001d017508	Cortex	2.06405	1	Os04g0554500	Cortex	3.52316	2
OG0000499	AT1G62510	Cortex	1.65659	24	Zm00001d017508	Cortex	2.06405	1	Os04g0554600	Cortex	2.34678	14
OG0000499	AT1G62510	Cortex	1.65659	24	Zm00001d017508	Cortex	2.06405	1	Os02g0662000	Cortex	2.44182	11
OG0000499	AT4G12520	Cortex	1.77571	16	Zm00001d026163	Cortex	1.92558	4	Os04g0554500	Cortex	3.52316	2
OG0000499	AT4G12520	Cortex	1.77571	16	Zm00001d026163	Cortex	1.92558	4	Os04g0554600	Cortex	2.34678	14
OG0000499	AT4G12520	Cortex	1.77571	16	Zm00001d026163	Cortex	1.92558	4	Os02g0662000	Cortex	2.44182	11
OG0000499	AT4G12520	Cortex	1.77571	16	Zm00001d051384	Cortex	0.730557	190	Os04g0554500	Cortex	3.52316	2
OG0000499	AT4G12520	Cortex	1.77571	16	Zm00001d051384	Cortex	0.730557	190	Os04g0554600	Cortex	2.34678	14
OG0000499	AT4G12520	Cortex	1.77571	16	Zm00001d051384	Cortex	0.730557	190	Os02g0662000	Cortex	2.44182	11
OG0000499	AT4G12520	Cortex	1.77571	16	Zm00001d026162	Cortex	1.92	6	Os04g0554500	Cortex	3.52316	2
OG0000499	AT4G12520	Cortex	1.77571	16	Zm00001d026162	Cortex	1.92	6	Os04g0554600	Cortex	2.34678	14
OG0000499	AT4G12520	Cortex	1.77571	16	Zm00001d026162	Cortex	1.92	6	Os02g0662000	Cortex	2.44182	11
OG0000499	AT4G12510	Cortex	1.62941	25	Zm00001d026162	Cortex	1.92	6	Os04g0554500	Cortex	3.52316	2
OG0000499	AT4G12510	Cortex	1.62941	25	Zm00001d026162	Cortex	1.92	6	Os04g0554600	Cortex	2.34678	14
OG0000499	AT4G12510	Cortex	1.62941	25	Zm00001d026162	Cortex	1.92	6	Os02g0662000	Cortex	2.44182	11
OG0000499	AT4G12510	Cortex	1.62941	25	Zm00001d017508	Cortex	2.06405	1	Os04g0554500	Cortex	3.52316	2
OG0000499	AT4G12510	Cortex	1.62941	25	Zm00001d017508	Cortex	2.06405	1	Os04g0554600	Cortex	2.34678	14
OG0000499	AT4G12510	Cortex	1.62941	25	Zm00001d017508	Cortex	2.06405	1	Os02g0662000	Cortex	2.44182	11
OG0000499	AT4G12510	Cortex	1.62941	25	Zm00001d026163	Cortex	1.92558	4	Os04g0554500	Cortex	3.52316	2
OG0000499	AT4G12510	Cortex	1.62941	25	Zm00001d026163	Cortex	1.92558	4	Os04g0554600	Cortex	2.34678	14
OG0000499	AT4G12510	Cortex	1.62941	25	Zm00001d026163	Cortex	1.92558	4	Os02g0662000	Cortex	2.44182	11
OG0000499	AT1G12090	Cortex	4.25727	1	Zm00001d051384	Cortex	0.730557	190	Os04g0554500	Cortex	3.52316	2
OG0000499	AT1G12090	Cortex	4.25727	1	Zm00001d051384	Cortex	0.730557	190	Os04g0554600	Cortex	2.34678	14
OG0000499	AT1G12090	Cortex	4.25727	1	Zm00001d051384	Cortex	0.730557	190	Os02g0662000	Cortex	2.44182	11
OG0000499	AT1G12090	Cortex	4.25727	1	Zm00001d026162	Cortex	1.92	6	Os04g0554500	Cortex	3.52316	2
OG0000499	AT1G12090	Cortex	4.25727	1	Zm00001d026162	Cortex	1.92	6	Os04g0554600	Cortex	2.34678	14
OG0000499	AT1G12090	Cortex	4.25727	1	Zm00001d026162	Cortex	1.92	6	Os02g0662000	Cortex	2.44182	11
OG0000499	AT4G12520	Cortex	1.77571	16	Zm00001d017508	Cortex	2.06405	1	Os04g0554500	Cortex	3.52316	2
OG0000499	AT4G12520	Cortex	1.77571	16	Zm00001d017508	Cortex	2.06405	1	Os04g0554600	Cortex	2.34678	14
OG0000499	AT4G12520	Cortex	1.77571	16	Zm00001d017508	Cortex	2.06405	1	Os02g0662000	Cortex	2.44182	11
OG0000499	AT1G12090	Cortex	4.25727	1	Zm00001d026163	Cortex	1.92558	4	Os04g0554500	Cortex	3.52316	2
OG0000499	AT1G12090	Cortex	4.25727	1	Zm00001d026163	Cortex	1.92558	4	Os04g0554600	Cortex	2.34678	14
OG0000499	AT1G12090	Cortex	4.25727	1	Zm00001d026163	Cortex	1.92558	4	Os02g0662000	Cortex	2.44182	11
OG0000499	AT1G12090	Cortex	4.25727	1	Zm00001d017508	Cortex	2.06405	1	Os04g0554500	Cortex	3.52316	2
OG0000499	AT1G12090	Cortex	4.25727	1	Zm00001d017508	Cortex	2.06405	1	Os04g0554600	Cortex	2.34678	14
OG0000499	AT1G12090	Cortex	4.25727	1	Zm00001d017508	Cortex	2.06405	1	Os02g0662000	Cortex	2.44182	11
OG0000929	AT4G17340	Cortex	0.78278	182	Zm00001d051362	Cortex	1.28827	24	Os06g0336200	Cortex	0.93435	133
OG0000929	AT4G17340	Cortex	0.78278	182	Zm00001d026177	Cortex	1.31037	19	Os06g0336200	Cortex	0.93435	133
OG0000929	AT5G47450	Cortex	0.770332	195	Zm00001d026177	Cortex	1.31037	19	Os06g0336200	Cortex	0.93435	133
OG0000929	AT3G16240	Cortex	0.864429	150	Zm00001d051362	Cortex	1.28827	24	Os06g0336200	Cortex	0.93435	133
OG0000929	AT3G16240	Cortex	0.864429	150	Zm00001d026177	Cortex	1.31037	19	Os06g0336200	Cortex	0.93435	133
OG0000929	AT5G47450	Cortex	0.770332	195	Zm00001d051362	Cortex	1.28827	24	Os06g0336200	Cortex	0.93435	133
OG0001348	AT2G42570	Cortex	1.41711	48	Zm00001d044037	Cortex	1.0416	54	Os01g0652100	Cortex	1.20812	67
OG0001348	AT2G34070	Cortex	1.34682	56	Zm00001d044037	Cortex	1.0416	54	Os01g0652100	Cortex	1.20812	67
OG0013259	AT5G40450	Cortex	0.894131	144	Zm00001d015138	Cortex	1.02176	60	Os02g0131100	Cortex	0.928005	135

## Sheet: Trichoblast
Orthogroup	gene.x	cluster.x	avg_log2FC.x	rank.x	gene.y	cluster.y	avg_log2FC.y	rank.y	gene	cluster	avg_log2FC	rank
OG0000221	AT1G70490	Trichoblast2	0.906594	197	Zm00001d008295	Epidermis	1.18024	94	Os01g0265100	Trichoblast1	1.22341	103

## Sheet: Atrichoblast
Orthogroup	gene.x	cluster.x	avg_log2FC.x	rank.x	gene.y	cluster.y	avg_log2FC.y	rank.y	gene	cluster	avg_log2FC	rank
OG0001440	AT3G29250	Atrichoblast1	1.9793	24	Zm00001d034731	Epidermis	1.1431	100	Os03g0833100	Atrichoblast	0.959999	133

## Sheet: Atrichoblast_Epidermis
Orthogroup	gene.x	cluster.x	avg_log2FC.x	rank.x	gene.y	cluster.y	avg_log2FC.y	rank.y	gene	cluster	avg_log2FC	rank
OG0000377	AT2G27720	Atrichoblast2	1.50432	88	Zm00001d009657	Endodermal_Initials	0.962809	77	Os01g0191100	Endodermis	1.4307	135
OG0000377	AT2G27720	Atrichoblast2	1.50432	88	Zm00001d009657	Endodermal_Initials	0.962809	77	Os05g0445500	Endodermis	1.31591	173
OG0000377	AT2G27710	Atrichoblast2	1.84767	13	Zm00001d009657	Endodermal_Initials	0.962809	77	Os01g0191100	Endodermis	1.4307	135
OG0000377	AT2G27710	Atrichoblast2	1.84767	13	Zm00001d009657	Endodermal_Initials	0.962809	77	Os05g0445500	Endodermis	1.31591	173
OG0000377	AT2G27710	Atrichoblast2	1.84767	13	Zm00001d009652	Endodermal_Initials	1.05	46	Os01g0191100	Endodermis	1.4307	135
OG0000377	AT2G27710	Atrichoblast2	1.84767	13	Zm00001d009652	Endodermal_Initials	1.05	46	Os05g0445500	Endodermis	1.31591	173
OG0000377	AT2G27720	Atrichoblast2	1.50432	88	Zm00001d001899	Endodermal_Initials	0.948023	86	Os01g0191100	Endodermis	1.4307	135
OG0000377	AT2G27720	Atrichoblast2	1.50432	88	Zm00001d001899	Endodermal_Initials	0.948023	86	Os05g0445500	Endodermis	1.31591	173
OG0000377	AT2G27710	Atrichoblast2	1.84767	13	Zm00001d009653	Endodermal_Initials	0.820033	173	Os01g0191100	Endodermis	1.4307	135
OG0000377	AT2G27710	Atrichoblast2	1.84767	13	Zm00001d009653	Endodermal_Initials	0.820033	173	Os05g0445500	Endodermis	1.31591	173
OG0000377	AT2G27710	Atrichoblast2	1.84767	13	Zm00001d001899	Endodermal_Initials	0.948023	86	Os01g0191100	Endodermis	1.4307	135
OG0000377	AT2G27710	Atrichoblast2	1.84767	13	Zm00001d001899	Endodermal_Initials	0.948023	86	Os05g0445500	Endodermis	1.31591	173
OG0000377	AT2G27720	Atrichoblast2	1.50432	88	Zm00001d009653	Endodermal_Initials	0.820033	173	Os01g0191100	Endodermis	1.4307	135
OG0000377	AT2G27720	Atrichoblast2	1.50432	88	Zm00001d009653	Endodermal_Initials	0.820033	173	Os05g0445500	Endodermis	1.31591	173
OG0000377	AT2G27720	Atrichoblast2	1.50432	88	Zm00001d009652	Endodermal_Initials	1.05	46	Os01g0191100	Endodermis	1.4307	135
OG0000377	AT2G27720	Atrichoblast2	1.50432	88	Zm00001d009652	Endodermal_Initials	1.05	46	Os05g0445500	Endodermis	1.31591	173
OG0000627	AT5G28060	Atrichoblast2	1.41591	115	Zm00001d011741	Endodermal_Initials	0.984211	67	Os01g0723200	Endodermis	1.63714	66
OG0000627	AT5G28060	Atrichoblast2	1.41591	115	Zm00001d011741	Endodermal_Initials	0.984211	67	Os06g0555400	Endodermis	1.3449	164
OG0000627	AT5G28060	Atrichoblast2	1.41591	115	Zm00001d011741	Endodermal_Initials	0.984211	67	Os02g0229000	Endodermis	1.39297	152
OG0000627	AT3G04920	Atrichoblast2	1.6044	58	Zm00001d011741	Endodermal_Initials	0.984211	67	Os01g0723200	Endodermis	1.63714	66
OG0000627	AT3G04920	Atrichoblast2	1.6044	58	Zm00001d011741	Endodermal_Initials	0.984211	67	Os06g0555400	Endodermis	1.3449	164
OG0000627	AT3G04920	Atrichoblast2	1.6044	58	Zm00001d011741	Endodermal_Initials	0.984211	67	Os02g0229000	Endodermis	1.39297	152
OG0000746	AT4G18730	Atrichoblast2	1.55009	75	Zm00001d053547	Endodermal_Initials	0.891625	122	Os05g0207300	Endodermis	1.51452	106
OG0000746	AT4G18730	Atrichoblast2	1.55009	75	Zm00001d053547	Endodermal_Initials	0.891625	122	Os01g0205500	Endodermis	1.22252	200
OG0000746	AT4G18730	Atrichoblast2	1.55009	75	Zm00001d053547	Endodermal_Initials	0.891625	122	Os02g0235600	Endodermis	1.22512	198
OG0000746	AT4G18730	Atrichoblast2	1.55009	75	Zm00001d046317	Endodermal_Initials	1.03817	51	Os05g0207300	Endodermis	1.51452	106
OG0000746	AT4G18730	Atrichoblast2	1.55009	75	Zm00001d046317	Endodermal_Initials	1.03817	51	Os01g0205500	Endodermis	1.22252	200
OG0000746	AT4G18730	Atrichoblast2	1.55009	75	Zm00001d046317	Endodermal_Initials	1.03817	51	Os02g0235600	Endodermis	1.22512	198
OG0000746	AT5G45775	Atrichoblast2	1.82218	18	Zm00001d053547	Endodermal_Initials	0.891625	122	Os05g0207300	Endodermis	1.51452	106
OG0000746	AT5G45775	Atrichoblast2	1.82218	18	Zm00001d053547	Endodermal_Initials	0.891625	122	Os01g0205500	Endodermis	1.22252	200
OG0000746	AT5G45775	Atrichoblast2	1.82218	18	Zm00001d053547	Endodermal_Initials	0.891625	122	Os02g0235600	Endodermis	1.22512	198
OG0000746	AT5G45775	Atrichoblast2	1.82218	18	Zm00001d010016	Endodermal_Initials	1.18974	18	Os05g0207300	Endodermis	1.51452	106
OG0000746	AT5G45775	Atrichoblast2	1.82218	18	Zm00001d010016	Endodermal_Initials	1.18974	18	Os01g0205500	Endodermis	1.22252	200
OG0000746	AT5G45775	Atrichoblast2	1.82218	18	Zm00001d010016	Endodermal_Initials	1.18974	18	Os02g0235600	Endodermis	1.22512	198
OG0000746	AT5G45775	Atrichoblast2	1.82218	18	Zm00001d046317	Endodermal_Initials	1.03817	51	Os05g0207300	Endodermis	1.51452	106
OG0000746	AT5G45775	Atrichoblast2	1.82218	18	Zm00001d046317	Endodermal_Initials	1.03817	51	Os01g0205500	Endodermis	1.22252	200
OG0000746	AT5G45775	Atrichoblast2	1.82218	18	Zm00001d046317	Endodermal_Initials	1.03817	51	Os02g0235600	Endodermis	1.22512	198
OG0000746	AT3G58700	Atrichoblast2	1.22574	164	Zm00001d053547	Endodermal_Initials	0.891625	122	Os05g0207300	Endodermis	1.51452	106
OG0000746	AT3G58700	Atrichoblast2	1.22574	164	Zm00001d053547	Endodermal_Initials	0.891625	122	Os01g0205500	Endodermis	1.22252	200
OG0000746	AT3G58700	Atrichoblast2	1.22574	164	Zm00001d053547	Endodermal_Initials	0.891625	122	Os02g0235600	Endodermis	1.22512	198
OG0000746	AT3G58700	Atrichoblast2	1.22574	164	Zm00001d010016	Endodermal_Initials	1.18974	18	Os05g0207300	Endodermis	1.51452	106
OG0000746	AT3G58700	Atrichoblast2	1.22574	164	Zm00001d010016	Endodermal_Initials	1.18974	18	Os01g0205500	Endodermis	1.22252	200
OG0000746	AT3G58700	Atrichoblast2	1.22574	164	Zm00001d010016	Endodermal_Initials	1.18974	18	Os02g0235600	Endodermis	1.22512	198
OG0000746	AT3G58700	Atrichoblast2	1.22574	164	Zm00001d046317	Endodermal_Initials	1.03817	51	Os05g0207300	Endodermis	1.51452	106
OG0000746	AT3G58700	Atrichoblast2	1.22574	164	Zm00001d046317	Endodermal_Initials	1.03817	51	Os01g0205500	Endodermis	1.22252	200
OG0000746	AT3G58700	Atrichoblast2	1.22574	164	Zm00001d046317	Endodermal_Initials	1.03817	51	Os02g0235600	Endodermis	1.22512	198
OG0000746	AT4G18730	Atrichoblast2	1.55009	75	Zm00001d010016	Endodermal_Initials	1.18974	18	Os05g0207300	Endodermis	1.51452	106
OG0000746	AT4G18730	Atrichoblast2	1.55009	75	Zm00001d010016	Endodermal_Initials	1.18974	18	Os01g0205500	Endodermis	1.22252	200
OG0000746	AT4G18730	Atrichoblast2	1.55009	75	Zm00001d010016	Endodermal_Initials	1.18974	18	Os02g0235600	Endodermis	1.22512	198
OG0000832	AT3G04400	Atrichoblast2	1.58022	63	Zm00001d048368	Endodermal_Initials	1.09248	34	Os03g0139100	Endodermis	1.62716	70
OG0000832	AT3G04400	Atrichoblast2	1.58022	63	Zm00001d048368	Endodermal_Initials	1.09248	34	Os02g0814700	Endodermis	1.46297	126
OG0000832	AT3G04400	Atrichoblast2	1.58022	63	Zm00001d048368	Endodermal_Initials	1.09248	34	Os10g0466700	Endodermis	1.5072	112
OG0000832	AT2G33370	Atrichoblast2	1.23292	162	Zm00001d051929	Endodermal_Initials	0.940746	88	Os03g0139100	Endodermis	1.62716	70
OG0000832	AT2G33370	Atrichoblast2	1.23292	162	Zm00001d051929	Endodermal_Initials	0.940746	88	Os02g0814700	Endodermis	1.46297	126
OG0000832	AT2G33370	Atrichoblast2	1.23292	162	Zm00001d051929	Endodermal_Initials	0.940746	88	Os10g0466700	Endodermis	1.5072	112
OG0000832	AT3G04400	Atrichoblast2	1.58022	63	Zm00001d051929	Endodermal_Initials	0.940746	88	Os03g0139100	Endodermis	1.62716	70
OG0000832	AT3G04400	Atrichoblast2	1.58022	63	Zm00001d051929	Endodermal_Initials	0.940746	88	Os02g0814700	Endodermis	1.46297	126
OG0000832	AT3G04400	Atrichoblast2	1.58022	63	Zm00001d051929	Endodermal_Initials	0.940746	88	Os10g0466700	Endodermis	1.5072	112
OG0000832	AT2G33370	Atrichoblast2	1.23292	162	Zm00001d048368	Endodermal_Initials	1.09248	34	Os03g0139100	Endodermis	1.62716	70
OG0000832	AT2G33370	Atrichoblast2	1.23292	162	Zm00001d048368	Endodermal_Initials	1.09248	34	Os02g0814700	Endodermis	1.46297	126
OG0000832	AT2G33370	Atrichoblast2	1.23292	162	Zm00001d048368	Endodermal_Initials	1.09248	34	Os10g0466700	Endodermis	1.5072	112
OG0000905	AT2G37190	Atrichoblast2	1.91572	7	Zm00001d002450	Endodermal_Initials	0.811857	178	Os02g0699600	Endodermis	1.49045	119
OG0000905	AT2G37190	Atrichoblast2	1.91572	7	Zm00001d002450	Endodermal_Initials	0.811857	178	Os04g0598200	Endodermis	1.67177	54
OG0000905	AT3G53430	Atrichoblast2	1.13087	191	Zm00001d002450	Endodermal_Initials	0.811857	178	Os02g0699600	Endodermis	1.49045	119
OG0000905	AT3G53430	Atrichoblast2	1.13087	191	Zm00001d002450	Endodermal_Initials	0.811857	178	Os04g0598200	Endodermis	1.67177	54
OG0000905	AT2G37190	Atrichoblast2	1.91572	7	Zm00001d051543	Endodermal_Initials	1.07871	40	Os02g0699600	Endodermis	1.49045	119
OG0000905	AT2G37190	Atrichoblast2	1.91572	7	Zm00001d051543	Endodermal_Initials	1.07871	40	Os04g0598200	Endodermis	1.67177	54
OG0000905	AT3G53430	Atrichoblast2	1.13087	191	Zm00001d051543	Endodermal_Initials	1.07871	40	Os02g0699600	Endodermis	1.49045	119
OG0000905	AT3G53430	Atrichoblast2	1.13087	191	Zm00001d051543	Endodermal_Initials	1.07871	40	Os04g0598200	Endodermis	1.67177	54
OG0000905	AT5G60670	Atrichoblast2	1.68602	44	Zm00001d002450	Endodermal_Initials	0.811857	178	Os02g0699600	Endodermis	1.49045	119
OG0000905	AT5G60670	Atrichoblast2	1.68602	44	Zm00001d002450	Endodermal_Initials	0.811857	178	Os04g0598200	Endodermis	1.67177	54
OG0000905	AT5G60670	Atrichoblast2	1.68602	44	Zm00001d051543	Endodermal_Initials	1.07871	40	Os02g0699600	Endodermis	1.49045	119
OG0000905	AT5G60670	Atrichoblast2	1.68602	44	Zm00001d051543	Endodermal_Initials	1.07871	40	Os04g0598200	Endodermis	1.67177	54
OG0000924	AT2G01250	Atrichoblast2	1.67928	45	Zm00001d026254	Endodermal_Initials	0.960674	79	Os04g0605900	Endodermis	1.51533	105
OG0000924	AT2G01250	Atrichoblast2	1.67928	45	Zm00001d026254	Endodermal_Initials	0.960674	79	Os08g0234000	Endodermis	1.60478	74
OG0000924	AT2G44120	Atrichoblast2	1.5415	78	Zm00001d026254	Endodermal_Initials	0.960674	79	Os04g0605900	Endodermis	1.51533	105
OG0000924	AT2G44120	Atrichoblast2	1.5415	78	Zm00001d026254	Endodermal_Initials	0.960674	79	Os08g0234000	Endodermis	1.60478	74
OG0000930	AT3G48930	Atrichoblast2	1.40532	118	Zm00001d002339	Endodermal_Initials	0.783442	198	Os04g0613600	Endodermis	1.81282	30
OG0000930	AT3G48930	Atrichoblast2	1.40532	118	Zm00001d002339	Endodermal_Initials	0.783442	198	Os07g0565100	Endodermis	1.79417	31
OG0000930	AT3G48930	Atrichoblast2	1.40532	118	Zm00001d002339	Endodermal_Initials	0.783442	198	Os07g0565000	Endodermis	1.56709	86
OG0000930	AT3G48930	Atrichoblast2	1.40532	118	Zm00001d026286	Endodermal_Initials	0.825582	170	Os04g0613600	Endodermis	1.81282	30
OG0000930	AT3G48930	Atrichoblast2	1.40532	118	Zm00001d026286	Endodermal_Initials	0.825582	170	Os07g0565100	Endodermis	1.79417	31
OG0000930	AT3G48930	Atrichoblast2	1.40532	118	Zm00001d026286	Endodermal_Initials	0.825582	170	Os07g0565000	Endodermis	1.56709	86
OG0000930	AT5G23740	Atrichoblast2	1.57591	65	Zm00001d026286	Endodermal_Initials	0.825582	170	Os04g0613600	Endodermis	1.81282	30
OG0000930	AT5G23740	Atrichoblast2	1.57591	65	Zm00001d026286	Endodermal_Initials	0.825582	170	Os07g0565100	Endodermis	1.79417	31
OG0000930	AT5G23740	Atrichoblast2	1.57591	65	Zm00001d026286	Endodermal_Initials	0.825582	170	Os07g0565000	Endodermis	1.56709	86
OG0000930	AT5G23740	Atrichoblast2	1.57591	65	Zm00001d002339	Endodermal_Initials	0.783442	198	Os04g0613600	Endodermis	1.81282	30
OG0000930	AT5G23740	Atrichoblast2	1.57591	65	Zm00001d002339	Endodermal_Initials	0.783442	198	Os07g0565100	Endodermis	1.79417	31
OG0000930	AT5G23740	Atrichoblast2	1.57591	65	Zm00001d002339	Endodermal_Initials	0.783442	198	Os07g0565000	Endodermis	1.56709	86
OG0000932	AT4G34670	Atrichoblast2	1.77464	22	Zm00001d048159	Endodermal_Initials	0.853925	148	Os12g0406200	Endodermis	1.35058	163
OG0000932	AT4G34670	Atrichoblast2	1.77464	22	Zm00001d048159	Endodermal_Initials	0.853925	148	Os02g0287000	Endodermis	1.47398	123
OG0000932	AT4G34670	Atrichoblast2	1.77464	22	Zm00001d048159	Endodermal_Initials	0.853925	148	Os03g0200500	Endodermis	1.58805	78
OG0000932	AT3G04840	Atrichoblast2	1.55392	73	Zm00001d048159	Endodermal_Initials	0.853925	148	Os12g0406200	Endodermis	1.35058	163
OG0000932	AT3G04840	Atrichoblast2	1.55392	73	Zm00001d048159	Endodermal_Initials	0.853925	148	Os02g0287000	Endodermis	1.47398	123
OG0000932	AT3G04840	Atrichoblast2	1.55392	73	Zm00001d048159	Endodermal_Initials	0.853925	148	Os03g0200500	Endodermis	1.58805	78
OG0001017	AT1G41880	Atrichoblast2	1.59501	61	Zm00001d052075	Endodermal_Initials	1.10541	31	Os02g0785800	Endodermis	1.42155	138
OG0001017	AT1G41880	Atrichoblast2	1.59501	61	Zm00001d052075	Endodermal_Initials	1.10541	31	Os05g0556900	Endodermis	1.40026	149
OG0001017	AT3G55750	Atrichoblast2	1.52127	82	Zm00001d052075	Endodermal_Initials	1.10541	31	Os02g0785800	Endodermis	1.42155	138
OG0001017	AT3G55750	Atrichoblast2	1.52127	82	Zm00001d052075	Endodermal_Initials	1.10541	31	Os05g0556900	Endodermis	1.40026	149
OG0001045	AT2G41840	Atrichoblast2	1.69372	42	Zm00001d034550	Endodermal_Initials	0.978415	73	Os03g0807800	Endodermis	1.5487	95
OG0001061	AT1G43170	Atrichoblast2	1.54954	77	Zm00001d004839	Endodermal_Initials	1.1911	17	Os12g0167900	Endodermis	1.40251	148
OG0001061	AT1G43170	Atrichoblast2	1.54954	77	Zm00001d004839	Endodermal_Initials	1.1911	17	Os11g0168200	Endodermis	1.49933	115
OG0001061	AT1G43170	Atrichoblast2	1.54954	77	Zm00001d003683	Endodermal_Initials	0.833583	164	Os12g0167900	Endodermis	1.40251	148
OG0001061	AT1G43170	Atrichoblast2	1.54954	77	Zm00001d003683	Endodermal_Initials	0.833583	164	Os11g0168200	Endodermis	1.49933	115
OG0001061	AT1G43170	Atrichoblast2	1.54954	77	Zm00001d004841	Endodermal_Initials	0.921238	101	Os12g0167900	Endodermis	1.40251	148
OG0001061	AT1G43170	Atrichoblast2	1.54954	77	Zm00001d004841	Endodermal_Initials	0.921238	101	Os11g0168200	Endodermis	1.49933	115
OG0001061	AT1G43170	Atrichoblast2	1.54954	77	Zm00001d003680	Endodermal_Initials	0.862008	144	Os12g0167900	Endodermis	1.40251	148
OG0001061	AT1G43170	Atrichoblast2	1.54954	77	Zm00001d003680	Endodermal_Initials	0.862008	144	Os11g0168200	Endodermis	1.49933	115
OG0001127	AT3G09200	Atrichoblast2	1.64361	50	Zm00001d049619	Endodermal_Initials	1.02486	57	Os08g0130500	Endodermis	1.37387	157
OG0001127	AT3G09200	Atrichoblast2	1.64361	50	Zm00001d035201	Endodermal_Initials	0.888347	128	Os08g0130500	Endodermis	1.37387	157
OG0001158	AT3G53890	Atrichoblast2	1.15117	181	Zm00001d029124	Endodermal_Initials	1.22277	12	Os03g0345200	Endodermis	1.51009	109
OG0001158	AT5G27700	Atrichoblast2	1.40894	116	Zm00001d029124	Endodermal_Initials	1.22277	12	Os03g0345200	Endodermis	1.51009	109
OG0001185	AT3G23390	Atrichoblast2	1.56497	69	Zm00001d021652	Endodermal_Initials	0.876742	137	Os07g0523700	Endodermis	1.68394	51
OG0001185	AT3G23390	Atrichoblast2	1.56497	69	Zm00001d021652	Endodermal_Initials	0.876742	137	Os07g0450000	Endodermis	1.22424	199
OG0001208	AT4G25740	Atrichoblast2	1.21894	166	Zm00001d003672	Endodermal_Initials	0.928534	99	Os01g0962600	Endodermis	1.56518	89
OG0001208	AT4G25740	Atrichoblast2	1.21894	166	Zm00001d003672	Endodermal_Initials	0.928534	99	Os04g0430100	Endodermis	1.40563	146
OG0001208	AT4G25740	Atrichoblast2	1.21894	166	Zm00001d025413	Endodermal_Initials	0.782626	199	Os01g0962600	Endodermis	1.56518	89
OG0001208	AT4G25740	Atrichoblast2	1.21894	166	Zm00001d025413	Endodermal_Initials	0.782626	199	Os04g0430100	Endodermis	1.40563	146
OG0001208	AT5G41520	Atrichoblast2	1.60522	57	Zm00001d025413	Endodermal_Initials	0.782626	199	Os01g0962600	Endodermis	1.56518	89
OG0001208	AT5G41520	Atrichoblast2	1.60522	57	Zm00001d025413	Endodermal_Initials	0.782626	199	Os04g0430100	Endodermis	1.40563	146
OG0001208	AT5G52650	Atrichoblast2	1.34639	133	Zm00001d003672	Endodermal_Initials	0.928534	99	Os01g0962600	Endodermis	1.56518	89
OG0001208	AT5G52650	Atrichoblast2	1.34639	133	Zm00001d003672	Endodermal_Initials	0.928534	99	Os04g0430100	Endodermis	1.40563	146
OG0001208	AT5G52650	Atrichoblast2	1.34639	133	Zm00001d025413	Endodermal_Initials	0.782626	199	Os01g0962600	Endodermis	1.56518	89
OG0001208	AT5G52650	Atrichoblast2	1.34639	133	Zm00001d025413	Endodermal_Initials	0.782626	199	Os04g0430100	Endodermis	1.40563	146
OG0001208	AT5G41520	Atrichoblast2	1.60522	57	Zm00001d003672	Endodermal_Initials	0.928534	99	Os01g0962600	Endodermis	1.56518	89
OG0001208	AT5G41520	Atrichoblast2	1.60522	57	Zm00001d003672	Endodermal_Initials	0.928534	99	Os04g0430100	Endodermis	1.40563	146
OG0001290	AT1G57660	Atrichoblast2	1.52023	83	Zm00001d014082	Endodermal_Initials	1.08139	38	Os03g0141000	Endodermis	1.50955	111
OG0001290	AT1G57660	Atrichoblast2	1.52023	83	Zm00001d027618	Endodermal_Initials	0.854773	147	Os03g0141000	Endodermis	1.50955	111
OG0001290	AT1G57860	Atrichoblast2	1.13814	187	Zm00001d027618	Endodermal_Initials	0.854773	147	Os03g0141000	Endodermis	1.50955	111
OG0001290	AT1G57860	Atrichoblast2	1.13814	187	Zm00001d032760	Endodermal_Initials	0.799826	184	Os03g0141000	Endodermis	1.50955	111
OG0001290	AT1G09590	Atrichoblast2	1.51701	85	Zm00001d014082	Endodermal_Initials	1.08139	38	Os03g0141000	Endodermis	1.50955	111
OG0001290	AT1G57660	Atrichoblast2	1.52023	83	Zm00001d032760	Endodermal_Initials	0.799826	184	Os03g0141000	Endodermis	1.50955	111
OG0001290	AT1G09590	Atrichoblast2	1.51701	85	Zm00001d032760	Endodermal_Initials	0.799826	184	Os03g0141000	Endodermis	1.50955	111
OG0001290	AT1G09690	Atrichoblast2	1.82788	16	Zm00001d014082	Endodermal_Initials	1.08139	38	Os03g0141000	Endodermis	1.50955	111
OG0001290	AT1G09690	Atrichoblast2	1.82788	16	Zm00001d027618	Endodermal_Initials	0.854773	147	Os03g0141000	Endodermis	1.50955	111
OG0001290	AT1G09690	Atrichoblast2	1.82788	16	Zm00001d032760	Endodermal_Initials	0.799826	184	Os03g0141000	Endodermis	1.50955	111
OG0001290	AT1G09590	Atrichoblast2	1.51701	85	Zm00001d027618	Endodermal_Initials	0.854773	147	Os03g0141000	Endodermis	1.50955	111
OG0001290	AT1G57860	Atrichoblast2	1.13814	187	Zm00001d014082	Endodermal_Initials	1.08139	38	Os03g0141000	Endodermis	1.50955	111
OG0001301	AT2G32060	Atrichoblast2	1.90961	9	Zm00001d039106	Endodermal_Initials	1.00177	60	Os07g0150200	Endodermis	1.44069	132
OG0001301	AT2G32060	Atrichoblast2	1.90961	9	Zm00001d039106	Endodermal_Initials	1.00177	60	Os07g0229900	Endodermis	1.66514	57
OG0001301	AT1G15930	Atrichoblast2	1.82081	19	Zm00001d039106	Endodermal_Initials	1.00177	60	Os07g0150200	Endodermis	1.44069	132
OG0001301	AT1G15930	Atrichoblast2	1.82081	19	Zm00001d039106	Endodermal_Initials	1.00177	60	Os07g0229900	Endodermis	1.66514	57
OG0001328	AT3G28900	Atrichoblast2	1.34075	138	Zm00001d032181	Endodermal_Initials	1.3511	5	Os08g0436800	Endodermis	1.41745	142
OG0001328	AT3G28900	Atrichoblast2	1.34075	138	Zm00001d032181	Endodermal_Initials	1.3511	5	Os08g0156800	Endodermis	1.56597	87
OG0001328	AT1G69620	Atrichoblast2	1.37778	126	Zm00001d032181	Endodermal_Initials	1.3511	5	Os08g0436800	Endodermis	1.41745	142
OG0001328	AT1G69620	Atrichoblast2	1.37778	126	Zm00001d032181	Endodermal_Initials	1.3511	5	Os08g0156800	Endodermis	1.56597	87
OG0001374	AT1G18540	Atrichoblast2	1.45582	102	Zm00001d017047	Endodermal_Initials	0.934928	95	Os02g0591700	Endodermis	1.26645	187
OG0001374	AT1G18540	Atrichoblast2	1.45582	102	Zm00001d017047	Endodermal_Initials	0.934928	95	Os04g0473400	Endodermis	1.54715	96
OG0001374	AT1G18540	Atrichoblast2	1.45582	102	Zm00001d050920	Endodermal_Initials	0.800778	183	Os02g0591700	Endodermis	1.26645	187
OG0001374	AT1G18540	Atrichoblast2	1.45582	102	Zm00001d050920	Endodermal_Initials	0.800778	183	Os04g0473400	Endodermis	1.54715	96
OG0001374	AT1G18540	Atrichoblast2	1.45582	102	Zm00001d050921	Endodermal_Initials	0.996768	63	Os02g0591700	Endodermis	1.26645	187
OG0001374	AT1G18540	Atrichoblast2	1.45582	102	Zm00001d050921	Endodermal_Initials	0.996768	63	Os04g0473400	Endodermis	1.54715	96
OG0001378	AT1G72370	Atrichoblast2	1.55831	71	Zm00001d048253	Endodermal_Initials	1.12188	28	Os03g0182600	Endodermis	1.55108	92
OG0001378	AT1G72370	Atrichoblast2	1.55831	71	Zm00001d006871	Endodermal_Initials	1.08302	36	Os03g0182600	Endodermis	1.55108	92
OG0001378	AT1G72370	Atrichoblast2	1.55831	71	Zm00001d027527	Endodermal_Initials	0.9952	64	Os03g0182600	Endodermis	1.55108	92
OG0001423	AT1G48630	Atrichoblast2	1.57196	66	Zm00001d038923	Endodermal_Initials	0.882726	134	Os05g0552300	Endodermis	2.00239	11
OG0001423	AT1G48630	Atrichoblast2	1.57196	66	Zm00001d038923	Endodermal_Initials	0.882726	134	Os01g0686800	Endodermis	1.35927	162
OG0001445	AT2G31610	Atrichoblast2	1.16758	177	Zm00001d024511	Endodermal_Initials	0.96165	78	Os03g0577000	Endodermis	1.44243	131
OG0001445	AT5G35530	Atrichoblast2	1.26648	155	Zm00001d024511	Endodermal_Initials	0.96165	78	Os03g0577000	Endodermis	1.44243	131
OG0001445	AT3G53870	Atrichoblast2	1.30747	145	Zm00001d024511	Endodermal_Initials	0.96165	78	Os03g0577000	Endodermis	1.44243	131
OG0001445	AT5G35530	Atrichoblast2	1.26648	155	Zm00001d022111	Endodermal_Initials	0.981172	69	Os03g0577000	Endodermis	1.44243	131
OG0001445	AT2G31610	Atrichoblast2	1.16758	177	Zm00001d022111	Endodermal_Initials	0.981172	69	Os03g0577000	Endodermis	1.44243	131
OG0001445	AT3G53870	Atrichoblast2	1.30747	145	Zm00001d022111	Endodermal_Initials	0.981172	69	Os03g0577000	Endodermis	1.44243	131
OG0001454	AT2G47610	Atrichoblast2	1.56273	70	Zm00001d006100	Endodermal_Initials	0.947416	87	Os09g0507800	Endodermis	1.57293	82
OG0001454	AT2G47610	Atrichoblast2	1.56273	70	Zm00001d006100	Endodermal_Initials	0.947416	87	Os08g0326400	Endodermis	1.66061	61
OG0001454	AT3G62870	Atrichoblast2	1.84647	14	Zm00001d031640	Endodermal_Initials	1.34391	6	Os09g0507800	Endodermis	1.57293	82
OG0001454	AT3G62870	Atrichoblast2	1.84647	14	Zm00001d031640	Endodermal_Initials	1.34391	6	Os08g0326400	Endodermis	1.66061	61
OG0001454	AT3G62870	Atrichoblast2	1.84647	14	Zm00001d006100	Endodermal_Initials	0.947416	87	Os09g0507800	Endodermis	1.57293	82
OG0001454	AT3G62870	Atrichoblast2	1.84647	14	Zm00001d006100	Endodermal_Initials	0.947416	87	Os08g0326400	Endodermis	1.66061	61
OG0001454	AT2G47610	Atrichoblast2	1.56273	70	Zm00001d031640	Endodermal_Initials	1.34391	6	Os09g0507800	Endodermis	1.57293	82
OG0001454	AT2G47610	Atrichoblast2	1.56273	70	Zm00001d031640	Endodermal_Initials	1.34391	6	Os08g0326400	Endodermis	1.66061	61
OG0001531	AT5G02870	Atrichoblast2	1.17148	176	Zm00001d007824	Endodermal_Initials	0.826097	169	Os07g0180900	Endodermis	1.50988	110
OG0001531	AT5G02870	Atrichoblast2	1.17148	176	Zm00001d007824	Endodermal_Initials	0.826097	169	Os03g0796501	Endodermis	1.4437	130
OG0001531	AT5G02870	Atrichoblast2	1.17148	176	Zm00001d018957	Endodermal_Initials	0.832143	165	Os07g0180900	Endodermis	1.50988	110
OG0001531	AT5G02870	Atrichoblast2	1.17148	176	Zm00001d018957	Endodermal_Initials	0.832143	165	Os03g0796501	Endodermis	1.4437	130
OG0001567	AT4G17390	Atrichoblast2	1.48766	93	Zm00001d006388	Endodermal_Initials	0.886042	130	Os03g0598800	Endodermis	1.75334	40
OG0001567	AT4G16720	Atrichoblast2	1.79937	20	Zm00001d006388	Endodermal_Initials	0.886042	130	Os03g0598800	Endodermis	1.75334	40
OG0001567	AT4G16720	Atrichoblast2	1.79937	20	Zm00001d021511	Endodermal_Initials	0.862347	143	Os03g0598800	Endodermis	1.75334	40
OG0001567	AT4G17390	Atrichoblast2	1.48766	93	Zm00001d021511	Endodermal_Initials	0.862347	143	Os03g0598800	Endodermis	1.75334	40
OG0001717	AT1G02780	Atrichoblast2	1.37261	128	Zm00001d045069	Endodermal_Initials	1.20961	14	Os03g0337800	Endodermis	1.42131	139
OG0001732	AT2G34480	Atrichoblast2	1.72931	32	Zm00001d009579	Endodermal_Initials	0.950511	84	Os05g0565000	Endodermis	1.53039	102
OG0001732	AT2G34480	Atrichoblast2	1.72931	32	Zm00001d009579	Endodermal_Initials	0.950511	84	Os01g0752300	Endodermis	1.43742	133
OG0001732	AT3G14600	Atrichoblast2	1.53187	80	Zm00001d009579	Endodermal_Initials	0.950511	84	Os05g0565000	Endodermis	1.53039	102
OG0001732	AT3G14600	Atrichoblast2	1.53187	80	Zm00001d009579	Endodermal_Initials	0.950511	84	Os01g0752300	Endodermis	1.43742	133
OG0001792	AT3G46040	Atrichoblast2	1.10715	199	Zm00001d009000	Endodermal_Initials	1.03099	54	Os07g0208000	Endodermis	1.91131	19
OG0001792	AT3G46040	Atrichoblast2	1.10715	199	Zm00001d009000	Endodermal_Initials	1.03099	54	Os02g0478600	Endodermis	1.66326	58
OG0001792	AT1G07770	Atrichoblast2	1.14015	186	Zm00001d009000	Endodermal_Initials	1.03099	54	Os07g0208000	Endodermis	1.91131	19
OG0001792	AT1G07770	Atrichoblast2	1.14015	186	Zm00001d009000	Endodermal_Initials	1.03099	54	Os02g0478600	Endodermis	1.66326	58
OG0001792	AT5G59850	Atrichoblast2	1.50948	86	Zm00001d009000	Endodermal_Initials	1.03099	54	Os07g0208000	Endodermis	1.91131	19
OG0001792	AT5G59850	Atrichoblast2	1.50948	86	Zm00001d009000	Endodermal_Initials	1.03099	54	Os02g0478600	Endodermis	1.66326	58
OG0001806	AT1G52300	Atrichoblast2	1.4162	114	Zm00001d054065	Endodermal_Initials	0.899449	116	Os02g0111700	Endodermis	1.5738	81
OG0001806	AT1G52300	Atrichoblast2	1.4162	114	Zm00001d054065	Endodermal_Initials	0.899449	116	Os08g0128500	Endodermis	1.28669	183
OG0001806	AT3G16080	Atrichoblast2	1.77336	23	Zm00001d054065	Endodermal_Initials	0.899449	116	Os02g0111700	Endodermis	1.5738	81
OG0001806	AT3G16080	Atrichoblast2	1.77336	23	Zm00001d054065	Endodermal_Initials	0.899449	116	Os08g0128500	Endodermis	1.28669	183
OG0001863	AT2G39460	Atrichoblast2	1.70063	39	Zm00001d025784	Endodermal_Initials	0.897394	119	Os04g0501000	Endodermis	1.24731	191
OG0001863	AT2G39460	Atrichoblast2	1.70063	39	Zm00001d025784	Endodermal_Initials	0.897394	119	Os01g0348700	Endodermis	1.48305	122
OG0001863	AT3G55280	Atrichoblast2	1.66455	48	Zm00001d025784	Endodermal_Initials	0.897394	119	Os04g0501000	Endodermis	1.24731	191
OG0001863	AT3G55280	Atrichoblast2	1.66455	48	Zm00001d025784	Endodermal_Initials	0.897394	119	Os01g0348700	Endodermis	1.48305	122
OG0001863	AT2G39460	Atrichoblast2	1.70063	39	Zm00001d003127	Endodermal_Initials	0.907304	109	Os04g0501000	Endodermis	1.24731	191
OG0001863	AT2G39460	Atrichoblast2	1.70063	39	Zm00001d003127	Endodermal_Initials	0.907304	109	Os01g0348700	Endodermis	1.48305	122
OG0001863	AT3G55280	Atrichoblast2	1.66455	48	Zm00001d003127	Endodermal_Initials	0.907304	109	Os04g0501000	Endodermis	1.24731	191
OG0001863	AT3G55280	Atrichoblast2	1.66455	48	Zm00001d003127	Endodermal_Initials	0.907304	109	Os01g0348700	Endodermis	1.48305	122
OG0001912	AT2G19750	Atrichoblast2	1.20097	170	Zm00001d018410	Endodermal_Initials	1.14695	24	Os06g0172600	Endodermis	1.54145	98
OG0001912	AT4G29390	Atrichoblast2	1.16725	178	Zm00001d018410	Endodermal_Initials	1.14695	24	Os06g0172600	Endodermis	1.54145	98
OG0001982	AT3G22230	Atrichoblast2	1.73729	29	Zm00001d036570	Endodermal_Initials	1.00116	61	Os02g0284600	Endodermis	1.51155	108
OG0001982	AT3G22230	Atrichoblast2	1.73729	29	Zm00001d036570	Endodermal_Initials	1.00116	61	Os10g0564300	Endodermis	1.88998	21
OG0001982	AT4G15000	Atrichoblast2	1.6466	49	Zm00001d036570	Endodermal_Initials	1.00116	61	Os02g0284600	Endodermis	1.51155	108
OG0001982	AT4G15000	Atrichoblast2	1.6466	49	Zm00001d036570	Endodermal_Initials	1.00116	61	Os10g0564300	Endodermis	1.88998	21
OG0002481	AT2G40590	Atrichoblast2	1.1463	184	Zm00001d012992	Endodermal_Initials	0.985687	66	Os05g0477300	Endodermis	1.5016	114
OG0002481	AT2G40590	Atrichoblast2	1.1463	184	Zm00001d012992	Endodermal_Initials	0.985687	66	Os01g0823300	Endodermis	1.36817	159
OG0002481	AT3G56340	Atrichoblast2	1.49534	91	Zm00001d012992	Endodermal_Initials	0.985687	66	Os05g0477300	Endodermis	1.5016	114
OG0002481	AT3G56340	Atrichoblast2	1.49534	91	Zm00001d012992	Endodermal_Initials	0.985687	66	Os01g0823300	Endodermis	1.36817	159
OG0002512	AT4G36130	Atrichoblast2	1.44166	106	Zm00001d041568	Endodermal_Initials	0.846588	152	Os12g0567700	Endodermis	1.90062	20
OG0002512	AT2G18020	Atrichoblast2	1.91187	8	Zm00001d041568	Endodermal_Initials	0.846588	152	Os12g0567700	Endodermis	1.90062	20
OG0002550	AT4G27090	Atrichoblast2	1.73851	28	Zm00001d006287	Endodermal_Initials	1.01282	58	Os02g0622300	Endodermis	1.66267	59
OG0002550	AT4G27090	Atrichoblast2	1.73851	28	Zm00001d006287	Endodermal_Initials	1.01282	58	Os04g0515300	Endodermis	1.56735	85
OG0002565	AT2G36160	Atrichoblast2	1.55494	72	Zm00001d000120	Endodermal_Initials	1.09858	33	Os04g0413600	Endodermis	1.31332	174
OG0002565	AT2G36160	Atrichoblast2	1.55494	72	Zm00001d000120	Endodermal_Initials	1.09858	33	Os02g0534800	Endodermis	1.6099	73
OG0002565	AT2G36160	Atrichoblast2	1.55494	72	Zm00001d000120	Endodermal_Initials	1.09858	33	Os02g0162500	Endodermis	1.56977	83
OG0002565	AT3G11510	Atrichoblast2	1.4728	96	Zm00001d000120	Endodermal_Initials	1.09858	33	Os04g0413600	Endodermis	1.31332	174
OG0002565	AT3G11510	Atrichoblast2	1.4728	96	Zm00001d000120	Endodermal_Initials	1.09858	33	Os02g0534800	Endodermis	1.6099	73
OG0002565	AT3G11510	Atrichoblast2	1.4728	96	Zm00001d000120	Endodermal_Initials	1.09858	33	Os02g0162500	Endodermis	1.56977	83
OG0002565	AT2G36160	Atrichoblast2	1.55494	72	Zm00001d036568	Endodermal_Initials	1.0756	42	Os04g0413600	Endodermis	1.31332	174
OG0002565	AT2G36160	Atrichoblast2	1.55494	72	Zm00001d036568	Endodermal_Initials	1.0756	42	Os02g0534800	Endodermis	1.6099	73
OG0002565	AT2G36160	Atrichoblast2	1.55494	72	Zm00001d036568	Endodermal_Initials	1.0756	42	Os02g0162500	Endodermis	1.56977	83
OG0002565	AT3G11510	Atrichoblast2	1.4728	96	Zm00001d036568	Endodermal_Initials	1.0756	42	Os04g0413600	Endodermis	1.31332	174
OG0002565	AT3G11510	Atrichoblast2	1.4728	96	Zm00001d036568	Endodermal_Initials	1.0756	42	Os02g0534800	Endodermis	1.6099	73
OG0002565	AT3G11510	Atrichoblast2	1.4728	96	Zm00001d036568	Endodermal_Initials	1.0756	42	Os02g0162500	Endodermis	1.56977	83
OG0002614	AT5G27850	Atrichoblast2	1.84773	12	Zm00001d009848	Endodermal_Initials	0.891105	124	Os03g0341100	Endodermis	1.38379	155
OG0002614	AT5G27850	Atrichoblast2	1.84773	12	Zm00001d009848	Endodermal_Initials	0.891105	124	Os05g0155100	Endodermis	1.71161	44
OG0002614	AT3G05590	Atrichoblast2	1.40866	117	Zm00001d009848	Endodermal_Initials	0.891105	124	Os03g0341100	Endodermis	1.38379	155
OG0002614	AT3G05590	Atrichoblast2	1.40866	117	Zm00001d009848	Endodermal_Initials	0.891105	124	Os05g0155100	Endodermis	1.71161	44
OG0002811	AT5G15200	Atrichoblast2	1.74839	26	Zm00001d047186	Endodermal_Initials	1.31737	7	Os11g0602600	Endodermis	1.52129	103
OG0002811	AT5G15200	Atrichoblast2	1.74839	26	Zm00001d047186	Endodermal_Initials	1.31737	7	Os03g0154700	Endodermis	1.77047	36
OG0003292	AT3G11940	Atrichoblast2	1.53458	79	Zm00001d037929	Endodermal_Initials	0.93774	91	Os01g0100700	Endodermis	1.84956	26
OG0003292	AT3G11940	Atrichoblast2	1.53458	79	Zm00001d037929	Endodermal_Initials	0.93774	91	Os11g0482000	Endodermis	1.43376	134
OG0003292	AT2G37270	Atrichoblast2	1.43719	109	Zm00001d037929	Endodermal_Initials	0.93774	91	Os01g0100700	Endodermis	1.84956	26
OG0003292	AT2G37270	Atrichoblast2	1.43719	109	Zm00001d037929	Endodermal_Initials	0.93774	91	Os11g0482000	Endodermis	1.43376	134
OG0003432	AT3G47370	Atrichoblast2	1.21127	169	Zm00001d028426	Endodermal_Initials	0.79646	185	Os10g0170200	Endodermis	1.41752	141
OG0003432	AT3G47370	Atrichoblast2	1.21127	169	Zm00001d028426	Endodermal_Initials	0.79646	185	Os03g0249400	Endodermis	1.549	94
OG0003432	AT5G62300	Atrichoblast2	1.23863	160	Zm00001d028426	Endodermal_Initials	0.79646	185	Os10g0170200	Endodermis	1.41752	141
OG0003432	AT5G62300	Atrichoblast2	1.23863	160	Zm00001d028426	Endodermal_Initials	0.79646	185	Os03g0249400	Endodermis	1.549	94
OG0003432	AT3G45030	Atrichoblast2	1.61643	54	Zm00001d028426	Endodermal_Initials	0.79646	185	Os10g0170200	Endodermis	1.41752	141
OG0003432	AT3G45030	Atrichoblast2	1.61643	54	Zm00001d028426	Endodermal_Initials	0.79646	185	Os03g0249400	Endodermis	1.549	94
OG0003476	AT3G60245	Atrichoblast2	1.89344	11	Zm00001d009509	Endodermal_Initials	1.11675	29	Os05g0557000	Endodermis	1.39876	151
OG0003476	AT3G60245	Atrichoblast2	1.89344	11	Zm00001d009509	Endodermal_Initials	1.11675	29	Os01g0679700	Endodermis	1.53859	99
OG0003604	AT4G18100	Atrichoblast2	1.42424	111	Zm00001d021020	Endodermal_Initials	0.837848	158	Os09g0501200	Endodermis	1.42692	137
OG0003604	AT4G18100	Atrichoblast2	1.42424	111	Zm00001d006064	Endodermal_Initials	1.16714	21	Os09g0501200	Endodermis	1.42692	137
OG0004105	AT1G67430	Atrichoblast2	1.69011	43	Zm00001d037732	Endodermal_Initials	1.0905	35	Os09g0258600	Endodermis	1.91846	17
OG0004105	AT1G67430	Atrichoblast2	1.69011	43	Zm00001d049815	Endodermal_Initials	0.848439	149	Os09g0258600	Endodermis	1.91846	17
OG0004105	AT1G27400	Atrichoblast2	1.91695	6	Zm00001d037732	Endodermal_Initials	1.0905	35	Os09g0258600	Endodermis	1.91846	17
OG0004105	AT1G27400	Atrichoblast2	1.91695	6	Zm00001d049815	Endodermal_Initials	0.848439	149	Os09g0258600	Endodermis	1.91846	17
OG0004675	AT5G64140	Atrichoblast2	1.37747	127	Zm00001d047697	Endodermal_Initials	0.872016	139	Os10g0411700	Endodermis	1.58195	79
OG0004675	AT5G03850	Atrichoblast2	1.34095	137	Zm00001d047697	Endodermal_Initials	0.872016	139	Os10g0411700	Endodermis	1.58195	79
OG0006226	AT3G61110	Atrichoblast2	1.46487	101	Zm00001d016491	Endodermal_Initials	1.0816	37	Os02g0478700	Endodermis	1.71033	45

## Sheet: Stele_Epidermis
Orthogroup	gene.x	cluster.x	avg_log2FC.x	rank.x	gene.y	cluster.y	avg_log2FC.y	rank.y	gene	cluster	avg_log2FC	rank
OG0000377	AT2G27710	Stele1	1.1909	93	Zm00001d009652	Endodermal_Initials	1.05	46	Os01g0191100	Endodermis	1.4307	135
OG0000377	AT2G27710	Stele1	1.1909	93	Zm00001d009652	Endodermal_Initials	1.05	46	Os05g0445500	Endodermis	1.31591	173
OG0000377	AT2G27710	Stele1	1.1909	93	Zm00001d009653	Endodermal_Initials	0.820033	173	Os01g0191100	Endodermis	1.4307	135
OG0000377	AT2G27710	Stele1	1.1909	93	Zm00001d009653	Endodermal_Initials	0.820033	173	Os05g0445500	Endodermis	1.31591	173
OG0000377	AT2G27720	Stele1	1.06719	132	Zm00001d009652	Endodermal_Initials	1.05	46	Os01g0191100	Endodermis	1.4307	135
OG0000377	AT2G27720	Stele1	1.06719	132	Zm00001d009652	Endodermal_Initials	1.05	46	Os05g0445500	Endodermis	1.31591	173
OG0000377	AT2G27710	Stele1	1.1909	93	Zm00001d009657	Endodermal_Initials	0.962809	77	Os01g0191100	Endodermis	1.4307	135
OG0000377	AT2G27710	Stele1	1.1909	93	Zm00001d009657	Endodermal_Initials	0.962809	77	Os05g0445500	Endodermis	1.31591	173
OG0000377	AT2G27720	Stele1	1.06719	132	Zm00001d009653	Endodermal_Initials	0.820033	173	Os01g0191100	Endodermis	1.4307	135
OG0000377	AT2G27720	Stele1	1.06719	132	Zm00001d009653	Endodermal_Initials	0.820033	173	Os05g0445500	Endodermis	1.31591	173
OG0000377	AT2G27710	Stele1	1.1909	93	Zm00001d001899	Endodermal_Initials	0.948023	86	Os01g0191100	Endodermis	1.4307	135
OG0000377	AT2G27710	Stele1	1.1909	93	Zm00001d001899	Endodermal_Initials	0.948023	86	Os05g0445500	Endodermis	1.31591	173
OG0000377	AT2G27720	Stele1	1.06719	132	Zm00001d009657	Endodermal_Initials	0.962809	77	Os01g0191100	Endodermis	1.4307	135
OG0000377	AT2G27720	Stele1	1.06719	132	Zm00001d009657	Endodermal_Initials	0.962809	77	Os05g0445500	Endodermis	1.31591	173
OG0000377	AT2G27720	Stele1	1.06719	132	Zm00001d001899	Endodermal_Initials	0.948023	86	Os01g0191100	Endodermis	1.4307	135
OG0000377	AT2G27720	Stele1	1.06719	132	Zm00001d001899	Endodermal_Initials	0.948023	86	Os05g0445500	Endodermis	1.31591	173
OG0000627	AT3G04920	Stele1	1.10753	116	Zm00001d011741	Endodermal_Initials	0.984211	67	Os06g0555400	Endodermis	1.3449	164
OG0000627	AT3G04920	Stele1	1.10753	116	Zm00001d011741	Endodermal_Initials	0.984211	67	Os02g0229000	Endodermis	1.39297	152
OG0000627	AT3G04920	Stele1	1.10753	116	Zm00001d011741	Endodermal_Initials	0.984211	67	Os01g0723200	Endodermis	1.63714	66
OG0000627	AT5G28060	Stele1	1.38036	33	Zm00001d011741	Endodermal_Initials	0.984211	67	Os06g0555400	Endodermis	1.3449	164
OG0000627	AT5G28060	Stele1	1.38036	33	Zm00001d011741	Endodermal_Initials	0.984211	67	Os02g0229000	Endodermis	1.39297	152
OG0000627	AT5G28060	Stele1	1.38036	33	Zm00001d011741	Endodermal_Initials	0.984211	67	Os01g0723200	Endodermis	1.63714	66
OG0000746	AT4G18730	Stele1	1.28636	53	Zm00001d010016	Endodermal_Initials	1.18974	18	Os05g0207300	Endodermis	1.51452	106
OG0000746	AT4G18730	Stele1	1.28636	53	Zm00001d010016	Endodermal_Initials	1.18974	18	Os02g0235600	Endodermis	1.22512	198
OG0000746	AT4G18730	Stele1	1.28636	53	Zm00001d010016	Endodermal_Initials	1.18974	18	Os01g0205500	Endodermis	1.22252	200
OG0000746	AT4G18730	Stele1	1.28636	53	Zm00001d053547	Endodermal_Initials	0.891625	122	Os05g0207300	Endodermis	1.51452	106
OG0000746	AT4G18730	Stele1	1.28636	53	Zm00001d053547	Endodermal_Initials	0.891625	122	Os02g0235600	Endodermis	1.22512	198
OG0000746	AT4G18730	Stele1	1.28636	53	Zm00001d053547	Endodermal_Initials	0.891625	122	Os01g0205500	Endodermis	1.22252	200
OG0000746	AT4G18730	Stele1	1.28636	53	Zm00001d046317	Endodermal_Initials	1.03817	51	Os05g0207300	Endodermis	1.51452	106
OG0000746	AT4G18730	Stele1	1.28636	53	Zm00001d046317	Endodermal_Initials	1.03817	51	Os02g0235600	Endodermis	1.22512	198
OG0000746	AT4G18730	Stele1	1.28636	53	Zm00001d046317	Endodermal_Initials	1.03817	51	Os01g0205500	Endodermis	1.22252	200
OG0000832	AT2G33370	Stele1	1.02282	157	Zm00001d048368	Endodermal_Initials	1.09248	34	Os10g0466700	Endodermis	1.5072	112
OG0000832	AT2G33370	Stele1	1.02282	157	Zm00001d048368	Endodermal_Initials	1.09248	34	Os03g0139100	Endodermis	1.62716	70
OG0000832	AT2G33370	Stele1	1.02282	157	Zm00001d048368	Endodermal_Initials	1.09248	34	Os02g0814700	Endodermis	1.46297	126
OG0000832	AT3G04400	Stele1	1.32991	44	Zm00001d048368	Endodermal_Initials	1.09248	34	Os10g0466700	Endodermis	1.5072	112
OG0000832	AT3G04400	Stele1	1.32991	44	Zm00001d048368	Endodermal_Initials	1.09248	34	Os03g0139100	Endodermis	1.62716	70
OG0000832	AT3G04400	Stele1	1.32991	44	Zm00001d048368	Endodermal_Initials	1.09248	34	Os02g0814700	Endodermis	1.46297	126
OG0000832	AT3G04400	Stele1	1.32991	44	Zm00001d051929	Endodermal_Initials	0.940746	88	Os10g0466700	Endodermis	1.5072	112
OG0000832	AT3G04400	Stele1	1.32991	44	Zm00001d051929	Endodermal_Initials	0.940746	88	Os03g0139100	Endodermis	1.62716	70
OG0000832	AT3G04400	Stele1	1.32991	44	Zm00001d051929	Endodermal_Initials	0.940746	88	Os02g0814700	Endodermis	1.46297	126
OG0000832	AT2G33370	Stele1	1.02282	157	Zm00001d051929	Endodermal_Initials	0.940746	88	Os10g0466700	Endodermis	1.5072	112
OG0000832	AT2G33370	Stele1	1.02282	157	Zm00001d051929	Endodermal_Initials	0.940746	88	Os03g0139100	Endodermis	1.62716	70
OG0000832	AT2G33370	Stele1	1.02282	157	Zm00001d051929	Endodermal_Initials	0.940746	88	Os02g0814700	Endodermis	1.46297	126
OG0000905	AT2G37190	Stele1	0.988572	171	Zm00001d051543	Endodermal_Initials	1.07871	40	Os04g0598200	Endodermis	1.67177	54
OG0000905	AT2G37190	Stele1	0.988572	171	Zm00001d051543	Endodermal_Initials	1.07871	40	Os02g0699600	Endodermis	1.49045	119
OG0000905	AT3G53430	Stele1	0.968434	179	Zm00001d051543	Endodermal_Initials	1.07871	40	Os04g0598200	Endodermis	1.67177	54
OG0000905	AT3G53430	Stele1	0.968434	179	Zm00001d051543	Endodermal_Initials	1.07871	40	Os02g0699600	Endodermis	1.49045	119
OG0000905	AT3G53430	Stele1	0.968434	179	Zm00001d002450	Endodermal_Initials	0.811857	178	Os04g0598200	Endodermis	1.67177	54
OG0000905	AT3G53430	Stele1	0.968434	179	Zm00001d002450	Endodermal_Initials	0.811857	178	Os02g0699600	Endodermis	1.49045	119
OG0000905	AT2G37190	Stele1	0.988572	171	Zm00001d002450	Endodermal_Initials	0.811857	178	Os04g0598200	Endodermis	1.67177	54
OG0000905	AT2G37190	Stele1	0.988572	171	Zm00001d002450	Endodermal_Initials	0.811857	178	Os02g0699600	Endodermis	1.49045	119
OG0000924	AT2G01250	Stele1	1.02662	152	Zm00001d026254	Endodermal_Initials	0.960674	79	Os04g0605900	Endodermis	1.51533	105
OG0000924	AT2G01250	Stele1	1.02662	152	Zm00001d026254	Endodermal_Initials	0.960674	79	Os08g0234000	Endodermis	1.60478	74
OG0000930	AT3G48930	Stele1	1.30766	50	Zm00001d002339	Endodermal_Initials	0.783442	198	Os07g0565000	Endodermis	1.56709	86
OG0000930	AT3G48930	Stele1	1.30766	50	Zm00001d002339	Endodermal_Initials	0.783442	198	Os04g0613600	Endodermis	1.81282	30
OG0000930	AT3G48930	Stele1	1.30766	50	Zm00001d002339	Endodermal_Initials	0.783442	198	Os07g0565100	Endodermis	1.79417	31
OG0000930	AT5G23740	Stele1	0.947945	190	Zm00001d002339	Endodermal_Initials	0.783442	198	Os07g0565000	Endodermis	1.56709	86
OG0000930	AT5G23740	Stele1	0.947945	190	Zm00001d002339	Endodermal_Initials	0.783442	198	Os04g0613600	Endodermis	1.81282	30
OG0000930	AT5G23740	Stele1	0.947945	190	Zm00001d002339	Endodermal_Initials	0.783442	198	Os07g0565100	Endodermis	1.79417	31
OG0000930	AT3G48930	Stele1	1.30766	50	Zm00001d026286	Endodermal_Initials	0.825582	170	Os07g0565000	Endodermis	1.56709	86
OG0000930	AT3G48930	Stele1	1.30766	50	Zm00001d026286	Endodermal_Initials	0.825582	170	Os04g0613600	Endodermis	1.81282	30
OG0000930	AT3G48930	Stele1	1.30766	50	Zm00001d026286	Endodermal_Initials	0.825582	170	Os07g0565100	Endodermis	1.79417	31
OG0000930	AT5G23740	Stele1	0.947945	190	Zm00001d026286	Endodermal_Initials	0.825582	170	Os07g0565000	Endodermis	1.56709	86
OG0000930	AT5G23740	Stele1	0.947945	190	Zm00001d026286	Endodermal_Initials	0.825582	170	Os04g0613600	Endodermis	1.81282	30
OG0000930	AT5G23740	Stele1	0.947945	190	Zm00001d026286	Endodermal_Initials	0.825582	170	Os07g0565100	Endodermis	1.79417	31
OG0000932	AT3G04840	Stele1	1.06559	135	Zm00001d048159	Endodermal_Initials	0.853925	148	Os12g0406200	Endodermis	1.35058	163
OG0000932	AT3G04840	Stele1	1.06559	135	Zm00001d048159	Endodermal_Initials	0.853925	148	Os02g0287000	Endodermis	1.47398	123
OG0000932	AT3G04840	Stele1	1.06559	135	Zm00001d048159	Endodermal_Initials	0.853925	148	Os03g0200500	Endodermis	1.58805	78
OG0000932	AT4G34670	Stele1	0.954371	189	Zm00001d048159	Endodermal_Initials	0.853925	148	Os12g0406200	Endodermis	1.35058	163
OG0000932	AT4G34670	Stele1	0.954371	189	Zm00001d048159	Endodermal_Initials	0.853925	148	Os02g0287000	Endodermis	1.47398	123
OG0000932	AT4G34670	Stele1	0.954371	189	Zm00001d048159	Endodermal_Initials	0.853925	148	Os03g0200500	Endodermis	1.58805	78
OG0001017	AT3G55750	Stele1	0.956241	185	Zm00001d052075	Endodermal_Initials	1.10541	31	Os02g0785800	Endodermis	1.42155	138
OG0001017	AT3G55750	Stele1	0.956241	185	Zm00001d052075	Endodermal_Initials	1.10541	31	Os05g0556900	Endodermis	1.40026	149
OG0001045	AT2G41840	Stele1	0.985958	173	Zm00001d034550	Endodermal_Initials	0.978415	73	Os03g0807800	Endodermis	1.5487	95
OG0001061	AT1G43170	Stele1	1.26809	59	Zm00001d004841	Endodermal_Initials	0.921238	101	Os11g0168200	Endodermis	1.49933	115
OG0001061	AT1G43170	Stele1	1.26809	59	Zm00001d004841	Endodermal_Initials	0.921238	101	Os12g0167900	Endodermis	1.40251	148
OG0001061	AT1G43170	Stele1	1.26809	59	Zm00001d003683	Endodermal_Initials	0.833583	164	Os11g0168200	Endodermis	1.49933	115
OG0001061	AT1G43170	Stele1	1.26809	59	Zm00001d003683	Endodermal_Initials	0.833583	164	Os12g0167900	Endodermis	1.40251	148
OG0001061	AT1G43170	Stele1	1.26809	59	Zm00001d004839	Endodermal_Initials	1.1911	17	Os11g0168200	Endodermis	1.49933	115
OG0001061	AT1G43170	Stele1	1.26809	59	Zm00001d004839	Endodermal_Initials	1.1911	17	Os12g0167900	Endodermis	1.40251	148
OG0001061	AT1G43170	Stele1	1.26809	59	Zm00001d003680	Endodermal_Initials	0.862008	144	Os11g0168200	Endodermis	1.49933	115
OG0001061	AT1G43170	Stele1	1.26809	59	Zm00001d003680	Endodermal_Initials	0.862008	144	Os12g0167900	Endodermis	1.40251	148
OG0001127	AT3G09200	Stele1	1.14239	105	Zm00001d049619	Endodermal_Initials	1.02486	57	Os08g0130500	Endodermis	1.37387	157
OG0001127	AT3G09200	Stele1	1.14239	105	Zm00001d035201	Endodermal_Initials	0.888347	128	Os08g0130500	Endodermis	1.37387	157
OG0001158	AT3G53890	Stele1	1.0287	151	Zm00001d029124	Endodermal_Initials	1.22277	12	Os03g0345200	Endodermis	1.51009	109
OG0001185	AT3G23390	Stele1	1.05092	143	Zm00001d021652	Endodermal_Initials	0.876742	137	Os07g0523700	Endodermis	1.68394	51
OG0001185	AT3G23390	Stele1	1.05092	143	Zm00001d021652	Endodermal_Initials	0.876742	137	Os07g0450000	Endodermis	1.22424	199
OG0001208	AT5G41520	Stele1	1.21179	78	Zm00001d003672	Endodermal_Initials	0.928534	99	Os04g0430100	Endodermis	1.40563	146
OG0001208	AT5G41520	Stele1	1.21179	78	Zm00001d003672	Endodermal_Initials	0.928534	99	Os01g0962600	Endodermis	1.56518	89
OG0001208	AT5G41520	Stele1	1.21179	78	Zm00001d025413	Endodermal_Initials	0.782626	199	Os04g0430100	Endodermis	1.40563	146
OG0001208	AT5G41520	Stele1	1.21179	78	Zm00001d025413	Endodermal_Initials	0.782626	199	Os01g0962600	Endodermis	1.56518	89
OG0001290	AT1G57660	Stele1	1.06562	134	Zm00001d027618	Endodermal_Initials	0.854773	147	Os03g0141000	Endodermis	1.50955	111
OG0001290	AT1G57660	Stele1	1.06562	134	Zm00001d032760	Endodermal_Initials	0.799826	184	Os03g0141000	Endodermis	1.50955	111
OG0001290	AT1G57660	Stele1	1.06562	134	Zm00001d014082	Endodermal_Initials	1.08139	38	Os03g0141000	Endodermis	1.50955	111
OG0001328	AT1G69620	Stele1	1.0975	120	Zm00001d032181	Endodermal_Initials	1.3511	5	Os08g0436800	Endodermis	1.41745	142
OG0001328	AT1G69620	Stele1	1.0975	120	Zm00001d032181	Endodermal_Initials	1.3511	5	Os08g0156800	Endodermis	1.56597	87
OG0001374	AT1G18540	Stele1	1.06569	133	Zm00001d050921	Endodermal_Initials	0.996768	63	Os04g0473400	Endodermis	1.54715	96
OG0001374	AT1G18540	Stele1	1.06569	133	Zm00001d050921	Endodermal_Initials	0.996768	63	Os02g0591700	Endodermis	1.26645	187
OG0001374	AT1G18540	Stele1	1.06569	133	Zm00001d017047	Endodermal_Initials	0.934928	95	Os04g0473400	Endodermis	1.54715	96
OG0001374	AT1G18540	Stele1	1.06569	133	Zm00001d017047	Endodermal_Initials	0.934928	95	Os02g0591700	Endodermis	1.26645	187
OG0001374	AT1G18540	Stele1	1.06569	133	Zm00001d050920	Endodermal_Initials	0.800778	183	Os04g0473400	Endodermis	1.54715	96
OG0001374	AT1G18540	Stele1	1.06569	133	Zm00001d050920	Endodermal_Initials	0.800778	183	Os02g0591700	Endodermis	1.26645	187
OG0001378	AT1G72370	Stele1	1.14799	103	Zm00001d027527	Endodermal_Initials	0.9952	64	Os03g0182600	Endodermis	1.55108	92
OG0001378	AT1G72370	Stele1	1.14799	103	Zm00001d006871	Endodermal_Initials	1.08302	36	Os03g0182600	Endodermis	1.55108	92
OG0001378	AT1G72370	Stele1	1.14799	103	Zm00001d048253	Endodermal_Initials	1.12188	28	Os03g0182600	Endodermis	1.55108	92
OG0001445	AT3G53870	Stele1	1.1107	114	Zm00001d024511	Endodermal_Initials	0.96165	78	Os03g0577000	Endodermis	1.44243	131
OG0001445	AT3G53870	Stele1	1.1107	114	Zm00001d022111	Endodermal_Initials	0.981172	69	Os03g0577000	Endodermis	1.44243	131
OG0001454	AT3G62870	Stele1	1.13218	107	Zm00001d031640	Endodermal_Initials	1.34391	6	Os09g0507800	Endodermis	1.57293	82
OG0001454	AT3G62870	Stele1	1.13218	107	Zm00001d031640	Endodermal_Initials	1.34391	6	Os08g0326400	Endodermis	1.66061	61
OG0001454	AT2G47610	Stele1	1.19842	89	Zm00001d031640	Endodermal_Initials	1.34391	6	Os09g0507800	Endodermis	1.57293	82
OG0001454	AT2G47610	Stele1	1.19842	89	Zm00001d031640	Endodermal_Initials	1.34391	6	Os08g0326400	Endodermis	1.66061	61
OG0001454	AT3G62870	Stele1	1.13218	107	Zm00001d006100	Endodermal_Initials	0.947416	87	Os09g0507800	Endodermis	1.57293	82
OG0001454	AT3G62870	Stele1	1.13218	107	Zm00001d006100	Endodermal_Initials	0.947416	87	Os08g0326400	Endodermis	1.66061	61
OG0001454	AT2G47610	Stele1	1.19842	89	Zm00001d006100	Endodermal_Initials	0.947416	87	Os09g0507800	Endodermis	1.57293	82
OG0001454	AT2G47610	Stele1	1.19842	89	Zm00001d006100	Endodermal_Initials	0.947416	87	Os08g0326400	Endodermis	1.66061	61
OG0001531	AT5G02870	Stele1	1.09871	119	Zm00001d007824	Endodermal_Initials	0.826097	169	Os07g0180900	Endodermis	1.50988	110
OG0001531	AT5G02870	Stele1	1.09871	119	Zm00001d007824	Endodermal_Initials	0.826097	169	Os03g0796501	Endodermis	1.4437	130
OG0001531	AT5G02870	Stele1	1.09871	119	Zm00001d018957	Endodermal_Initials	0.832143	165	Os07g0180900	Endodermis	1.50988	110
OG0001531	AT5G02870	Stele1	1.09871	119	Zm00001d018957	Endodermal_Initials	0.832143	165	Os03g0796501	Endodermis	1.4437	130
OG0001567	AT4G17390	Stele1	1.27322	58	Zm00001d021511	Endodermal_Initials	0.862347	143	Os03g0598800	Endodermis	1.75334	40
OG0001567	AT4G16720	Stele1	1.12368	111	Zm00001d006388	Endodermal_Initials	0.886042	130	Os03g0598800	Endodermis	1.75334	40
OG0001567	AT4G17390	Stele1	1.27322	58	Zm00001d006388	Endodermal_Initials	0.886042	130	Os03g0598800	Endodermis	1.75334	40
OG0001567	AT4G16720	Stele1	1.12368	111	Zm00001d021511	Endodermal_Initials	0.862347	143	Os03g0598800	Endodermis	1.75334	40
OG0001717	AT1G02780	Stele1	1.38628	31	Zm00001d045069	Endodermal_Initials	1.20961	14	Os03g0337800	Endodermis	1.42131	139
OG0001732	AT2G34480	Stele1	1.27759	56	Zm00001d009579	Endodermal_Initials	0.950511	84	Os01g0752300	Endodermis	1.43742	133
OG0001732	AT2G34480	Stele1	1.27759	56	Zm00001d009579	Endodermal_Initials	0.950511	84	Os05g0565000	Endodermis	1.53039	102
OG0001732	AT3G14600	Stele1	0.933212	199	Zm00001d009579	Endodermal_Initials	0.950511	84	Os01g0752300	Endodermis	1.43742	133
OG0001732	AT3G14600	Stele1	0.933212	199	Zm00001d009579	Endodermal_Initials	0.950511	84	Os05g0565000	Endodermis	1.53039	102
OG0001792	AT1G07770	Stele1	1.31028	49	Zm00001d009000	Endodermal_Initials	1.03099	54	Os02g0478600	Endodermis	1.66326	58
OG0001792	AT1G07770	Stele1	1.31028	49	Zm00001d009000	Endodermal_Initials	1.03099	54	Os07g0208000	Endodermis	1.91131	19
OG0001806	AT1G52300	Stele1	1.51424	19	Zm00001d054065	Endodermal_Initials	0.899449	116	Os02g0111700	Endodermis	1.5738	81
OG0001806	AT1G52300	Stele1	1.51424	19	Zm00001d054065	Endodermal_Initials	0.899449	116	Os08g0128500	Endodermis	1.28669	183
OG0001863	AT2G39460	Stele1	1.00425	165	Zm00001d025784	Endodermal_Initials	0.897394	119	Os04g0501000	Endodermis	1.24731	191
OG0001863	AT2G39460	Stele1	1.00425	165	Zm00001d025784	Endodermal_Initials	0.897394	119	Os01g0348700	Endodermis	1.48305	122
OG0001863	AT2G39460	Stele1	1.00425	165	Zm00001d003127	Endodermal_Initials	0.907304	109	Os04g0501000	Endodermis	1.24731	191
OG0001863	AT2G39460	Stele1	1.00425	165	Zm00001d003127	Endodermal_Initials	0.907304	109	Os01g0348700	Endodermis	1.48305	122
OG0001956	AT4G33865	Stele1	1.01197	160	Zm00001d041727	Endodermal_Initials	0.979477	71	Os12g0508300	Endodermis	1.4569	128
OG0001956	AT4G33865	Stele1	1.01197	160	Zm00001d041727	Endodermal_Initials	0.979477	71	Os11g0634500	Endodermis	1.45707	127
OG0001982	AT4G15000	Stele1	1.38015	34	Zm00001d036570	Endodermal_Initials	1.00116	61	Os02g0284600	Endodermis	1.51155	108
OG0001982	AT4G15000	Stele1	1.38015	34	Zm00001d036570	Endodermal_Initials	1.00116	61	Os10g0564300	Endodermis	1.88998	21
OG0002481	AT3G56340	Stele1	1.1031	117	Zm00001d012992	Endodermal_Initials	0.985687	66	Os01g0823300	Endodermis	1.36817	159
OG0002481	AT3G56340	Stele1	1.1031	117	Zm00001d012992	Endodermal_Initials	0.985687	66	Os05g0477300	Endodermis	1.5016	114
OG0002512	AT2G18020	Stele1	1.08742	126	Zm00001d041568	Endodermal_Initials	0.846588	152	Os12g0567700	Endodermis	1.90062	20
OG0002550	AT4G27090	Stele1	1.21899	75	Zm00001d006287	Endodermal_Initials	1.01282	58	Os04g0515300	Endodermis	1.56735	85
OG0002550	AT4G27090	Stele1	1.21899	75	Zm00001d006287	Endodermal_Initials	1.01282	58	Os02g0622300	Endodermis	1.66267	59
OG0002565	AT3G11510	Stele1	1.26545	60	Zm00001d000120	Endodermal_Initials	1.09858	33	Os02g0162500	Endodermis	1.56977	83
OG0002565	AT3G11510	Stele1	1.26545	60	Zm00001d000120	Endodermal_Initials	1.09858	33	Os02g0534800	Endodermis	1.6099	73
OG0002565	AT3G11510	Stele1	1.26545	60	Zm00001d000120	Endodermal_Initials	1.09858	33	Os04g0413600	Endodermis	1.31332	174
OG0002565	AT2G36160	Stele1	1.36236	38	Zm00001d000120	Endodermal_Initials	1.09858	33	Os02g0162500	Endodermis	1.56977	83
OG0002565	AT2G36160	Stele1	1.36236	38	Zm00001d000120	Endodermal_Initials	1.09858	33	Os02g0534800	Endodermis	1.6099	73
OG0002565	AT2G36160	Stele1	1.36236	38	Zm00001d000120	Endodermal_Initials	1.09858	33	Os04g0413600	Endodermis	1.31332	174
OG0002565	AT3G11510	Stele1	1.26545	60	Zm00001d036568	Endodermal_Initials	1.0756	42	Os02g0162500	Endodermis	1.56977	83
OG0002565	AT3G11510	Stele1	1.26545	60	Zm00001d036568	Endodermal_Initials	1.0756	42	Os02g0534800	Endodermis	1.6099	73
OG0002565	AT3G11510	Stele1	1.26545	60	Zm00001d036568	Endodermal_Initials	1.0756	42	Os04g0413600	Endodermis	1.31332	174
OG0002565	AT2G36160	Stele1	1.36236	38	Zm00001d036568	Endodermal_Initials	1.0756	42	Os02g0162500	Endodermis	1.56977	83
OG0002565	AT2G36160	Stele1	1.36236	38	Zm00001d036568	Endodermal_Initials	1.0756	42	Os02g0534800	Endodermis	1.6099	73
OG0002565	AT2G36160	Stele1	1.36236	38	Zm00001d036568	Endodermal_Initials	1.0756	42	Os04g0413600	Endodermis	1.31332	174
OG0002614	AT5G27850	Stele1	1.22668	72	Zm00001d009848	Endodermal_Initials	0.891105	124	Os03g0341100	Endodermis	1.38379	155
OG0002614	AT5G27850	Stele1	1.22668	72	Zm00001d009848	Endodermal_Initials	0.891105	124	Os05g0155100	Endodermis	1.71161	44
OG0002614	AT3G05590	Stele1	1.12798	108	Zm00001d009848	Endodermal_Initials	0.891105	124	Os03g0341100	Endodermis	1.38379	155
OG0002614	AT3G05590	Stele1	1.12798	108	Zm00001d009848	Endodermal_Initials	0.891105	124	Os05g0155100	Endodermis	1.71161	44
OG0002811	AT5G15200	Stele1	1.39011	30	Zm00001d047186	Endodermal_Initials	1.31737	7	Os11g0602600	Endodermis	1.52129	103
OG0002811	AT5G15200	Stele1	1.39011	30	Zm00001d047186	Endodermal_Initials	1.31737	7	Os03g0154700	Endodermis	1.77047	36
OG0003292	AT3G11940	Stele1	1.27777	55	Zm00001d037929	Endodermal_Initials	0.93774	91	Os01g0100700	Endodermis	1.84956	26
OG0003292	AT3G11940	Stele1	1.27777	55	Zm00001d037929	Endodermal_Initials	0.93774	91	Os11g0482000	Endodermis	1.43376	134
OG0003476	AT3G60245	Stele1	1.11965	113	Zm00001d009509	Endodermal_Initials	1.11675	29	Os05g0557000	Endodermis	1.39876	151
OG0003476	AT3G60245	Stele1	1.11965	113	Zm00001d009509	Endodermal_Initials	1.11675	29	Os01g0679700	Endodermis	1.53859	99
OG0003604	AT4G18100	Stele1	1.47188	24	Zm00001d006064	Endodermal_Initials	1.16714	21	Os09g0501200	Endodermis	1.42692	137
OG0003604	AT4G18100	Stele1	1.47188	24	Zm00001d021020	Endodermal_Initials	0.837848	158	Os09g0501200	Endodermis	1.42692	137
OG0004105	AT1G67430	Stele1	1.19363	91	Zm00001d037732	Endodermal_Initials	1.0905	35	Os09g0258600	Endodermis	1.91846	17
OG0004105	AT1G67430	Stele1	1.19363	91	Zm00001d049815	Endodermal_Initials	0.848439	149	Os09g0258600	Endodermis	1.91846	17
OG0006226	AT3G61110	Stele1	1.24869	66	Zm00001d016491	Endodermal_Initials	1.0816	37	Os02g0478700	Endodermis	1.71033	45
