# Supplementary material for: Cross-species single-cell annotation with orthologous marker gene groups
Source: Research Square preprint supplement (doi:10.21203/rs.3.rs-3079082/v1), 2023-06-26
Supplement: Supplementary file 2 [file 12e0e4282114bf0969b0ad77.xlsx]

## Sheet: ATH_Rice
Table S2: Pairwise comparison of Arabidopsis vs Rice.
Orthogroup	ATH_MG	ATH_clusters	ATH_avg_log2FC	ATH_rank	Rice_MG	Rice_clusters	Rice_avg_log2FC	Rice_rank
OG0001727	AT4G35350	Xylem	5.05762	1	Os05g0108600	Xylem	5.05168	2
OG0001727	AT4G35350	Xylem	5.05762	1	Os01g0971400	Xylem	5.02988	3			Note: Trichoblast = Hair
OG0001727	AT1G20850	Xylem	4.27247	2	Os05g0108600	Xylem	5.05168	2			Note: Atrichoblast = Nonhair
OG0001727	AT1G20850	Xylem	4.27247	2	Os01g0971400	Xylem	5.02988	3
OG0001069	AT4G23690	Xylem	3.54911	4	Os07g0638500	Xylem	5.74021	1
OG0001906	AT5G59290	Xylem	3.39185	5	Os03g0278000	Xylem	1.40752	79
OG0000569	AT5G15490	Xylem	3.22899	6	Os12g0443600	Xylem	2.37266	34
OG0000569	AT5G15490	Xylem	3.22899	6	Os12g0443500	Xylem	0.817776	161
OG0009507	AT5G02640	Xylem	2.63729	10	Os05g0120300	Xylem	3.00813	18
OG0008357	AT2G28315	Xylem	2.55603	11	Os02g0628200	Xylem	1.31154	87
OG0003481	AT5G49460	Xylem	2.41921	13	Os01g0300200	Xylem	1.39583	81
OG0000287	AT3G53620	Xylem	2.36308	16	Os05g0114000	Xylem	0.964532	137
OG0003708	AT5G03170	Xylem	2.13164	19	Os05g0163300	Xylem	2.48168	30
OG0003109	AT1G35780	Xylem	2.04712	21	Os07g0623600	Xylem	2.0386	40
OG0002209	AT1G60810	Xylem	2.00874	22	Os11g0696200	Xylem	1.51019	70
OG0000569	AT3G29360	Xylem	1.85012	27	Os12g0443600	Xylem	2.37266	34
OG0000569	AT3G29360	Xylem	1.85012	27	Os12g0443500	Xylem	0.817776	161
OG0000071	AT3G12110	Xylem	1.76566	31	Os10g0510000	Xylem	1.34675	84
OG0003708	AT5G60490	Xylem	1.64667	35	Os05g0163300	Xylem	2.48168	30
OG0004902	AT5G67230	Xylem	1.54881	41	Os06g0687900	Xylem	1.08148	120
OG0001292	AT1G33800	Xylem	1.48605	49	Os12g0204500	Xylem	2.06401	38
OG0001379	AT1G72230	Xylem	1.48173	50	Os06g0218600	Xylem	3.79184	6
OG0010741	AT1G79620	Xylem	1.46169	52	Os03g0329700	Xylem	2.28179	36
OG0001320	AT2G47500	Xylem	1.44617	54	Os03g0301800	Xylem	1.41184	78
OG0004006	AT1G09210	Xylem	1.43747	55	Os07g0246200	Xylem	0.694791	191
OG0003416	AT3G06035	Xylem	1.42731	57	Os07g0645000	Xylem	1.1853	105
OG0004601	AT2G46225	Xylem	1.41373	59	Os01g0622700	Xylem	1.11224	116
OG0003659	AT4G34490	Xylem	1.38885	61	Os03g0722600	Xylem	1.03152	125
OG0000101	AT5G12250	Xylem	1.37992	62	Os03g0780600	Xylem	1.30384	90
OG0000101	AT5G12250	Xylem	1.37992	62	Os01g0805900	Xylem	1.08964	119
OG0000902	AT3G55990	Xylem	1.34106	64	Os03g0291800	Xylem	1.84449	53
OG0000968	AT5G08370	Xylem	1.33773	65	Os10g0493600	Xylem	0.954579	140
OG0009381	AT5G66920	Xylem	1.27261	73	Os07g0119400	Xylem	0.795944	167
OG0006150	AT3G59690	Xylem	1.219	83	Os01g0896200	Xylem	1.4667	73
OG0011478	AT2G04850	Xylem	1.17973	90	Os03g0194300	Xylem	3.17964	16
OG0001337	AT1G17620	Xylem	1.14893	95	Os01g0195400	Xylem	1.81124	55
OG0002209	AT1G10670	Xylem	1.08346	110	Os11g0696200	Xylem	1.51019	70
OG0011922	AT3G10080	Xylem	1.08166	111	Os02g0532500	Xylem	2.3968	33
OG0000071	AT5G09810	Xylem	1.07081	114	Os10g0510000	Xylem	1.34675	84
OG0002549	AT2G33990	Xylem	1.06788	116	Os06g0155300	Xylem	0.932882	148
OG0000101	AT5G23860	Xylem	1.06495	118	Os03g0780600	Xylem	1.30384	90
OG0000101	AT5G23860	Xylem	1.06495	118	Os01g0805900	Xylem	1.08964	119
OG0001099	AT2G34410	Xylem	0.993816	134	Os01g0631100	Xylem	1.57218	66
OG0001099	AT2G34410	Xylem	0.993816	134	Os05g0582100	Xylem	1.20659	101
OG0003319	AT2G40320	Xylem	0.989079	136	Os03g0817900	Xylem	0.98851	135
OG0015177	AT5G35670	Xylem	0.974352	141	Os06g0611100	Xylem	0.752236	177
OG0000101	AT5G62700	Xylem	0.946963	149	Os03g0780600	Xylem	1.30384	90
OG0000101	AT5G62700	Xylem	0.946963	149	Os01g0805900	Xylem	1.08964	119
OG0008998	AT4G09890	Xylem	0.924783	157	Os06g0686600	Xylem	0.685137	194
OG0000327	AT1G75840	Xylem	0.921269	158	Os02g0312600	Xylem	2.95625	19
OG0000837	AT5G43700	Xylem	0.906865	163	Os12g0601400	Xylem	0.933647	147
OG0001906	AT3G46440	Xylem	0.893488	167	Os03g0278000	Xylem	1.40752	79
OG0001292	AT4G09990	Xylem	0.891406	168	Os12g0204500	Xylem	2.06401	38
OG0000071	AT3G53750	Xylem	0.85513	181	Os10g0510000	Xylem	1.34675	84
OG0001499	AT5G17920	Xylem	0.85011	184	Os12g0624000	Xylem	0.730321	181
OG0001069	AT4G11210	Xylem	0.845394	187	Os07g0638500	Xylem	5.74021	1
OG0004214	AT1G52910	Xylem	0.831598	191	Os07g0462200	Xylem	1.13289	111
OG0000071	AT2G37620	Xylem	0.824857	195	Os10g0510000	Xylem	1.34675	84
OG0000499	AT1G12090	Cortex	4.25727	1	Os04g0554500	Cortex	3.52316	2
OG0000499	AT1G12090	Cortex	4.25727	1	Os02g0662000	Cortex	2.44182	11
OG0000499	AT1G12090	Cortex	4.25727	1	Os04g0554600	Cortex	2.34678	14
OG0000509	AT4G30170	Cortex	3.10491	4	Os03g0762400	Cortex	0.832246	171
OG0002396	AT1G20190	Cortex	2.88272	6	Os04g0228400	Cortex	1.64177	34
OG0000101	AT1G75780	Cortex	2.18592	9	Os05g0413200	Cortex	1.64251	33
OG0000101	AT1G75780	Cortex	2.18592	9	Os01g0282800	Cortex	1.23372	57
OG0000101	AT1G75780	Cortex	2.18592	9	Os03g0661300	Cortex	1.22346	60
OG0000101	AT1G75780	Cortex	2.18592	9	Os01g0805900	Cortex	1.00217	110
OG0002400	AT1G03870	Cortex	2.02565	11	Os05g0563550	Cortex	1.86401	24
OG0000499	AT4G12520	Cortex	1.77571	16	Os04g0554500	Cortex	3.52316	2
OG0000499	AT4G12520	Cortex	1.77571	16	Os02g0662000	Cortex	2.44182	11
OG0000499	AT4G12520	Cortex	1.77571	16	Os04g0554600	Cortex	2.34678	14
OG0000416	AT4G23400	Cortex	1.76301	17	Os02g0666200	Cortex	0.792764	193
OG0000499	AT1G62510	Cortex	1.65659	24	Os04g0554500	Cortex	3.52316	2
OG0000499	AT1G62510	Cortex	1.65659	24	Os02g0662000	Cortex	2.44182	11
OG0000499	AT1G62510	Cortex	1.65659	24	Os04g0554600	Cortex	2.34678	14
OG0000499	AT4G12510	Cortex	1.62941	25	Os04g0554500	Cortex	3.52316	2
OG0000499	AT4G12510	Cortex	1.62941	25	Os02g0662000	Cortex	2.44182	11
OG0000499	AT4G12510	Cortex	1.62941	25	Os04g0554600	Cortex	2.34678	14
OG0003007	AT1G25230	Cortex	1.60163	27	Os03g0238600	Cortex	0.974418	120
OG0009323	AT4G20260	Cortex	1.59966	29	Os02g0285300	Cortex	1.36975	50
OG0003987	AT1G76090	Cortex	1.5961	30	Os03g0136200	Cortex	1.14153	78
OG0000101	AT1G20010	Cortex	1.53008	36	Os05g0413200	Cortex	1.64251	33
OG0000101	AT1G20010	Cortex	1.53008	36	Os01g0282800	Cortex	1.23372	57
OG0000101	AT1G20010	Cortex	1.53008	36	Os03g0661300	Cortex	1.22346	60
OG0000101	AT1G20010	Cortex	1.53008	36	Os01g0805900	Cortex	1.00217	110
OG0001348	AT2G42570	Cortex	1.41711	48	Os01g0652100	Cortex	1.20812	67
OG0001729	AT5G11420	Cortex	1.41448	49	Os02g0205200	Cortex	1.80539	26
OG0001729	AT5G11420	Cortex	1.41448	49	Os01g0611000	Cortex	1.41229	44
OG0000292	AT5G60660	Cortex	1.41207	50	Os07g0448800	Cortex	1.07653	94
OG0000292	AT5G60660	Cortex	1.41207	50	Os04g0233400	Cortex	0.79722	189
OG0001348	AT2G34070	Cortex	1.34682	56	Os01g0652100	Cortex	1.20812	67
OG0001729	AT5G25460	Cortex	1.31646	60	Os02g0205200	Cortex	1.80539	26
OG0001729	AT5G25460	Cortex	1.31646	60	Os01g0611000	Cortex	1.41229	44
OG0000416	AT4G00430	Cortex	1.30684	61	Os02g0666200	Cortex	0.792764	193
OG0000416	AT3G61430	Cortex	1.30363	62	Os02g0666200	Cortex	0.792764	193
OG0002525	AT2G22170	Cortex	1.24055	68	Os02g0753300	Cortex	1.40179	45
OG0000292	AT3G53420	Cortex	1.10517	85	Os07g0448800	Cortex	1.07653	94
OG0000292	AT3G53420	Cortex	1.10517	85	Os04g0233400	Cortex	0.79722	189
OG0001729	AT4G32460	Cortex	1.07612	91	Os02g0205200	Cortex	1.80539	26
OG0001729	AT4G32460	Cortex	1.07612	91	Os01g0611000	Cortex	1.41229	44
OG0000292	AT2G37170	Cortex	1.05938	95	Os07g0448800	Cortex	1.07653	94
OG0000292	AT2G37170	Cortex	1.05938	95	Os04g0233400	Cortex	0.79722	189
OG0001075	AT1G55360	Cortex	1.03549	102	Os07g0573400	Cortex	1.10523	88
OG0000254	AT1G50010	Cortex	1.03223	104	Os07g0574800	Cortex	1.15462	77
OG0000361	AT1G76160	Cortex	0.995236	113	Os06g0678800	Cortex	1.25045	56
OG0002232	AT3G25760	Cortex	0.944182	125	Os03g0438100	Cortex	0.809666	184
OG0002404	AT1G76490	Cortex	0.932204	128	Os08g0512700	Cortex	1.03319	105
OG0002404	AT1G76490	Cortex	0.932204	128	Os09g0492700	Cortex	1.01091	108
OG0000254	AT1G04820	Cortex	0.919559	134	Os07g0574800	Cortex	1.15462	77
OG0013259	AT5G40450	Cortex	0.894131	144	Os02g0131100	Cortex	0.928005	135
OG0000929	AT3G16240	Cortex	0.864429	150	Os06g0336200	Cortex	0.93435	133
OG0004182	AT1G08200	Cortex	0.854559	155	Os01g0969100	Cortex	0.792825	192
OG0000764	AT5G60920	Cortex	0.846921	157	Os05g0386800	Cortex	0.861928	157
OG0002320	AT1G78040	Cortex	0.815517	172	Os10g0371000	Cortex	1.75349	29
OG0000361	AT4G22010	Cortex	0.806262	177	Os06g0678800	Cortex	1.25045	56
OG0000929	AT4G17340	Cortex	0.78278	182	Os06g0336200	Cortex	0.93435	133
OG0002959	AT1G65840	Cortex	0.779065	185	Os04g0671300	Cortex	0.853248	162
OG0000416	AT1G01620	Cortex	0.776796	189	Os02g0666200	Cortex	0.792764	193
OG0007818	AT2G02780	Cortex	0.77635	192	Os06g0589600	Cortex	1.08966	92
OG0000929	AT5G47450	Cortex	0.770332	195	Os06g0336200	Cortex	0.93435	133
OG0008136	AT2G06925	Cortex	0.768483	200	Os03g0708000	Cortex	1.84235	25
OG0000499	AT1G12090	Cortex	4.25727	1	Os04g0554500	Cortex_like	2.19644	1
OG0000499	AT1G12090	Cortex	4.25727	1	Os02g0662000	Cortex_like	2.15974	3
OG0000499	AT1G12090	Cortex	4.25727	1	Os04g0554600	Cortex_like	1.63533	14
OG0000509	AT4G30170	Cortex	3.10491	4	Os03g0762400	Cortex_like	1.04752	50
OG0000101	AT1G75780	Cortex	2.18592	9	Os03g0661300	Cortex_like	1.12751	45
OG0002400	AT1G03870	Cortex	2.02565	11	Os01g0668100	Cortex_like	0.841455	101
OG0000499	AT4G12520	Cortex	1.77571	16	Os04g0554500	Cortex_like	2.19644	1
OG0000499	AT4G12520	Cortex	1.77571	16	Os02g0662000	Cortex_like	2.15974	3
OG0000499	AT4G12520	Cortex	1.77571	16	Os04g0554600	Cortex_like	1.63533	14
OG0000416	AT4G23400	Cortex	1.76301	17	Os02g0666200	Cortex_like	1.55836	17
OG0000416	AT4G23400	Cortex	1.76301	17	Os04g0559700	Cortex_like	0.832438	104
OG0000499	AT1G62510	Cortex	1.65659	24	Os04g0554500	Cortex_like	2.19644	1
OG0000499	AT1G62510	Cortex	1.65659	24	Os02g0662000	Cortex_like	2.15974	3
OG0000499	AT1G62510	Cortex	1.65659	24	Os04g0554600	Cortex_like	1.63533	14
OG0000499	AT4G12510	Cortex	1.62941	25	Os04g0554500	Cortex_like	2.19644	1
OG0000499	AT4G12510	Cortex	1.62941	25	Os02g0662000	Cortex_like	2.15974	3
OG0000499	AT4G12510	Cortex	1.62941	25	Os04g0554600	Cortex_like	1.63533	14
OG0003007	AT1G25230	Cortex	1.60163	27	Os03g0238600	Cortex_like	0.661627	176
OG0009323	AT4G20260	Cortex	1.59966	29	Os02g0285300	Cortex_like	1.23141	30
OG0000101	AT1G20010	Cortex	1.53008	36	Os03g0661300	Cortex_like	1.12751	45
OG0001348	AT2G42570	Cortex	1.41711	48	Os01g0652100	Cortex_like	0.630885	200
OG0000292	AT5G60660	Cortex	1.41207	50	Os04g0233400	Cortex_like	1.83734	8
OG0000292	AT5G60660	Cortex	1.41207	50	Os02g0629200	Cortex_like	1.56417	16
OG0000292	AT5G60660	Cortex	1.41207	50	Os07g0448800	Cortex_like	1.43474	21
OG0000292	AT5G60660	Cortex	1.41207	50	Os04g0521100	Cortex_like	1.04195	52
OG0001348	AT2G34070	Cortex	1.34682	56	Os01g0652100	Cortex_like	0.630885	200
OG0000416	AT4G00430	Cortex	1.30684	61	Os02g0666200	Cortex_like	1.55836	17
OG0000416	AT4G00430	Cortex	1.30684	61	Os04g0559700	Cortex_like	0.832438	104
OG0000416	AT3G61430	Cortex	1.30363	62	Os02g0666200	Cortex_like	1.55836	17
OG0000416	AT3G61430	Cortex	1.30363	62	Os04g0559700	Cortex_like	0.832438	104
OG0000292	AT3G53420	Cortex	1.10517	85	Os04g0233400	Cortex_like	1.83734	8
OG0000292	AT3G53420	Cortex	1.10517	85	Os02g0629200	Cortex_like	1.56417	16
OG0000292	AT3G53420	Cortex	1.10517	85	Os07g0448800	Cortex_like	1.43474	21
OG0000292	AT3G53420	Cortex	1.10517	85	Os04g0521100	Cortex_like	1.04195	52
OG0000952	AT4G12730	Cortex	1.09704	86	Os08g0321000	Cortex_like	0.925433	76
OG0000292	AT2G37170	Cortex	1.05938	95	Os04g0233400	Cortex_like	1.83734	8
OG0000292	AT2G37170	Cortex	1.05938	95	Os02g0629200	Cortex_like	1.56417	16
OG0000292	AT2G37170	Cortex	1.05938	95	Os07g0448800	Cortex_like	1.43474	21
OG0000292	AT2G37170	Cortex	1.05938	95	Os04g0521100	Cortex_like	1.04195	52
OG0001075	AT1G55360	Cortex	1.03549	102	Os07g0573400	Cortex_like	0.673485	169
OG0000254	AT1G50010	Cortex	1.03223	104	Os07g0574800	Cortex_like	0.863438	92
OG0004664	AT3G09940	Cortex	1.01707	109	Os08g0557600	Cortex_like	0.947714	70
OG0002232	AT3G25760	Cortex	0.944182	125	Os03g0438100	Cortex_like	0.887828	83
OG0002404	AT1G76490	Cortex	0.932204	128	Os09g0492700	Cortex_like	0.915875	78
OG0002404	AT1G76490	Cortex	0.932204	128	Os08g0512700	Cortex_like	0.654698	181
OG0000254	AT1G04820	Cortex	0.919559	134	Os07g0574800	Cortex_like	0.863438	92
OG0013259	AT5G40450	Cortex	0.894131	144	Os02g0131100	Cortex_like	0.995715	62
OG0000929	AT3G16240	Cortex	0.864429	150	Os02g0658100	Cortex_like	2.12873	4
OG0002320	AT1G78040	Cortex	0.815517	172	Os10g0371000	Cortex_like	0.962334	68
OG0000929	AT4G17340	Cortex	0.78278	182	Os02g0658100	Cortex_like	2.12873	4
OG0000416	AT1G01620	Cortex	0.776796	189	Os02g0666200	Cortex_like	1.55836	17
OG0000416	AT1G01620	Cortex	0.776796	189	Os04g0559700	Cortex_like	0.832438	104
OG0007818	AT2G02780	Cortex	0.77635	192	Os06g0589600	Cortex_like	0.744351	133
OG0000929	AT5G47450	Cortex	0.770332	195	Os02g0658100	Cortex_like	2.12873	4
OG0006375	AT3G61440	Cortex	0.768538	199	Os04g0165700	Cortex_like	0.635428	198
OG0008136	AT2G06925	Cortex	0.768483	200	Os03g0708000	Cortex_like	1.22187	32
OG0002396	AT1G20190	Cortex	2.88272	6	Os04g0228400	Stele	1.49137	7
OG0008132	AT2G06850	Cortex	2.58047	8	Os11g0539200	Stele	1.00365	63
OG0000101	AT1G75780	Cortex	2.18592	9	Os05g0413200	Stele	1.2897	22
OG0000101	AT1G75780	Cortex	2.18592	9	Os01g0282800	Stele	1.14916	33
OG0000101	AT1G75780	Cortex	2.18592	9	Os01g0805900	Stele	1.05766	51
OG0000101	AT1G75780	Cortex	2.18592	9	Os03g0661300	Stele	1.02912	55
OG0002400	AT1G03870	Cortex	2.02565	11	Os01g0668100	Stele	2.00505	1
OG0002400	AT1G03870	Cortex	2.02565	11	Os05g0563550	Stele	1.19255	30
OG0000416	AT4G23400	Cortex	1.76301	17	Os04g0559700	Stele	0.771823	138
OG0000416	AT4G23400	Cortex	1.76301	17	Os02g0666200	Stele	0.69922	179
OG0009323	AT4G20260	Cortex	1.59966	29	Os02g0285300	Stele	1.31514	19
OG0000101	AT1G20010	Cortex	1.53008	36	Os05g0413200	Stele	1.2897	22
OG0000101	AT1G20010	Cortex	1.53008	36	Os01g0282800	Stele	1.14916	33
OG0000101	AT1G20010	Cortex	1.53008	36	Os01g0805900	Stele	1.05766	51
OG0000101	AT1G20010	Cortex	1.53008	36	Os03g0661300	Stele	1.02912	55
OG0001729	AT5G11420	Cortex	1.41448	49	Os01g0611000	Stele	1.83857	3
OG0001729	AT5G11420	Cortex	1.41448	49	Os02g0205200	Stele	0.790944	131
OG0000292	AT5G60660	Cortex	1.41207	50	Os04g0233400	Stele	1.01944	59
OG0000292	AT5G60660	Cortex	1.41207	50	Os07g0448800	Stele	0.774374	135
OG0001729	AT5G25460	Cortex	1.31646	60	Os01g0611000	Stele	1.83857	3
OG0001729	AT5G25460	Cortex	1.31646	60	Os02g0205200	Stele	0.790944	131
OG0000416	AT4G00430	Cortex	1.30684	61	Os04g0559700	Stele	0.771823	138
OG0000416	AT4G00430	Cortex	1.30684	61	Os02g0666200	Stele	0.69922	179
OG0000416	AT3G61430	Cortex	1.30363	62	Os04g0559700	Stele	0.771823	138
OG0000416	AT3G61430	Cortex	1.30363	62	Os02g0666200	Stele	0.69922	179
OG0000292	AT3G53420	Cortex	1.10517	85	Os04g0233400	Stele	1.01944	59
OG0000292	AT3G53420	Cortex	1.10517	85	Os07g0448800	Stele	0.774374	135
OG0000952	AT4G12730	Cortex	1.09704	86	Os09g0248100	Stele	1.16459	32
OG0000952	AT4G12730	Cortex	1.09704	86	Os08g0321000	Stele	0.820667	118
OG0003416	AT5G19250	Cortex	1.08365	90	Os07g0645000	Stele	0.720156	161
OG0001729	AT4G32460	Cortex	1.07612	91	Os01g0611000	Stele	1.83857	3
OG0001729	AT4G32460	Cortex	1.07612	91	Os02g0205200	Stele	0.790944	131
OG0000292	AT2G37170	Cortex	1.05938	95	Os04g0233400	Stele	1.01944	59
OG0000292	AT2G37170	Cortex	1.05938	95	Os07g0448800	Stele	0.774374	135
OG0000871	AT1G76640	Cortex	1.0546	96	Os01g0955100	Stele	0.700555	178
OG0005692	AT1G75680	Cortex	1.04861	98	Os09g0533900	Stele	0.711739	168
OG0000871	AT1G76650	Cortex	1.04655	99	Os01g0955100	Stele	0.700555	178
OG0004330	AT1G05850	Cortex	1.04504	100	Os09g0494200	Stele	0.848702	103
OG0000254	AT1G50010	Cortex	1.03223	104	Os07g0574800	Stele	1.24741	26
OG0000254	AT1G50010	Cortex	1.03223	104	Os03g0726100	Stele	0.740552	150
OG0004664	AT3G09940	Cortex	1.01707	109	Os08g0557600	Stele	0.943569	73
OG0003416	AT5G19230	Cortex	0.953029	123	Os07g0645000	Stele	0.720156	161
OG0002404	AT1G76490	Cortex	0.932204	128	Os09g0492700	Stele	0.886252	95
OG0002404	AT1G76490	Cortex	0.932204	128	Os08g0512700	Stele	0.784518	134
OG0000254	AT1G04820	Cortex	0.919559	134	Os07g0574800	Stele	1.24741	26
OG0000254	AT1G04820	Cortex	0.919559	134	Os03g0726100	Stele	0.740552	150
OG0013259	AT5G40450	Cortex	0.894131	144	Os02g0131100	Stele	1.11698	38
OG0000764	AT5G60920	Cortex	0.846921	157	Os05g0386800	Stele	0.996897	64
OG0001366	AT3G47960	Cortex	0.825252	164	Os03g0687000	Stele	1.31576	18
OG0000838	AT1G04250	Cortex	0.797786	179	Os03g0742900	Stele	0.87974	98
OG0000416	AT1G01620	Cortex	0.776796	189	Os04g0559700	Stele	0.771823	138
OG0000416	AT1G01620	Cortex	0.776796	189	Os02g0666200	Stele	0.69922	179
OG0003086	AT4G00680	Trichoblast1	4.56195	9	Os02g0663800	Trichoblast1	3.43786	2
OG0003086	AT4G00680	Trichoblast1	4.56195	9	Os04g0555700	Trichoblast1	3.02528	5
OG0003086	AT1G01750	Trichoblast1	3.93589	15	Os02g0663800	Trichoblast1	3.43786	2
OG0003086	AT1G01750	Trichoblast1	3.93589	15	Os04g0555700	Trichoblast1	3.02528	5
OG0013196	AT5G05500	Trichoblast1	3.77079	19	Os01g0164075	Trichoblast1	2.12097	20
OG0013196	AT5G05500	Trichoblast1	3.77079	19	Os01g0164300	Trichoblast1	1.39731	80
OG0000287	AT4G01480	Trichoblast1	3.34656	28	Os05g0438500	Trichoblast1	2.07827	21
OG0002297	AT3G05490	Trichoblast1	3.16938	33	Os12g0541700	Trichoblast1	0.910465	186
OG0000614	AT2G19760	Trichoblast1	3.14248	34	Os10g0323600	Trichoblast1	2.05182	23
OG0001117	AT4G34580	Trichoblast1	2.92767	37	Os10g0122600	Trichoblast1	1.71217	48
OG0007946	AT1G62980	Trichoblast1	2.90717	39	Os10g0535900	Trichoblast1	1.55731	66
OG0011021	AT1G30870	Trichoblast1	2.8987	40	Os07g0499500	Trichoblast1	2.96469	6
OG0014922	AT3G09925	Trichoblast1	2.8792	42	Os10g0546100	Trichoblast1	2.68327	11
OG0007946	AT1G12560	Trichoblast1	2.84631	44	Os10g0535900	Trichoblast1	1.55731	66
OG0000071	AT3G18780	Trichoblast1	2.71462	48	Os03g0718100	Trichoblast1	0.999828	155
OG0002431	AT1G05810	Trichoblast1	2.66314	50	Os08g0525000	Trichoblast1	2.29332	16
OG0000514	AT5G53250	Trichoblast1	2.51458	55	Os02g0264800	Trichoblast1	0.895154	192
OG0009407	AT5G58010	Trichoblast1	2.27841	69	Os06g0184000	Trichoblast1	1.43507	75
OG0000287	AT2G46860	Trichoblast1	2.25105	71	Os05g0438500	Trichoblast1	2.07827	21
OG0000415	AT4G18430	Trichoblast1	2.23637	73	Os09g0327100	Trichoblast1	1.57894	63
OG0003102	AT1G08340	Trichoblast1	1.93148	90	Os01g0967200	Trichoblast1	1.66479	52
OG0001399	AT4G26690	Trichoblast1	1.88551	96	Os04g0472300	Trichoblast1	1.50613	70
OG0000087	AT3G60330	Trichoblast1	1.8456	100	Os12g0638700	Trichoblast1	1.64644	60
OG0000087	AT3G60330	Trichoblast1	1.8456	100	Os07g0191200	Trichoblast1	1.28302	92
OG0000087	AT4G30190	Trichoblast1	1.76762	108	Os12g0638700	Trichoblast1	1.64644	60
OG0000087	AT4G30190	Trichoblast1	1.76762	108	Os07g0191200	Trichoblast1	1.28302	92
OG0002046	AT4G18640	Trichoblast1	1.76007	110	Os01g0674800	Trichoblast1	0.955664	168
OG0003472	AT3G48140	Trichoblast1	1.7174	117	Os07g0274700	Trichoblast1	1.4894	71
OG0001050	AT1G70410	Trichoblast1	1.68832	122	Os01g0639900	Trichoblast1	1.87582	31
OG0002228	AT3G46830	Trichoblast1	1.63578	133	Os03g0823700	Trichoblast1	1.13424	118
OG0000071	AT1G49240	Trichoblast1	1.63069	136	Os03g0718100	Trichoblast1	0.999828	155
OG0000569	AT5G39320	Trichoblast1	1.59233	146	Os12g0443500	Trichoblast1	1.19193	109
OG0000158	AT1G53680	Trichoblast1	1.58845	147	Os09g0367700	Trichoblast1	1.53522	68
OG0002228	AT5G59150	Trichoblast1	1.56456	155	Os03g0823700	Trichoblast1	1.13424	118
OG0007409	AT1G54410	Trichoblast1	1.5525	157	Os03g0655400	Trichoblast1	1.52651	69
OG0004887	AT4G25570	Trichoblast1	1.51685	166	Os02g0642300	Trichoblast1	1.08221	130
OG0011073	AT1G48930	Trichoblast1	1.49552	171	Os04g0674800	Trichoblast1	2.71633	9
OG0004904	AT4G21105	Trichoblast1	1.49503	172	Os07g0647500	Trichoblast1	0.954207	170
OG0000825	AT1G70460	Trichoblast1	1.46331	177	Os06g0488050	Trichoblast1	1.21737	105
OG0004673	AT5G59613	Trichoblast1	1.4042	192	Os03g0606200	Trichoblast1	1.1249	123
OG0004774	AT5G66280	Trichoblast1	1.39772	194	Os06g0137700	Trichoblast1	1.14534	117
OG0003086	AT4G00680	Trichoblast1	4.56195	9	Os02g0663800	Trichoblast2	2.44991	32
OG0003086	AT4G00680	Trichoblast1	4.56195	9	Os04g0555700	Trichoblast2	2.30537	37
OG0003086	AT1G01750	Trichoblast1	3.93589	15	Os02g0663800	Trichoblast2	2.44991	32
OG0003086	AT1G01750	Trichoblast1	3.93589	15	Os04g0555700	Trichoblast2	2.30537	37
OG0013196	AT5G05500	Trichoblast1	3.77079	19	Os01g0164300	Trichoblast2	3.3823	11
OG0013196	AT5G05500	Trichoblast1	3.77079	19	Os01g0164075	Trichoblast2	3.06999	15
OG0000287	AT4G01480	Trichoblast1	3.34656	28	Os05g0114000	Trichoblast2	1.19823	127
OG0000287	AT4G01480	Trichoblast1	3.34656	28	Os05g0438500	Trichoblast2	1.10467	150
OG0000190	AT5G43350	Trichoblast1	3.1925	30	Os03g0150800	Trichoblast2	3.49729	10
OG0000614	AT2G19760	Trichoblast1	3.14248	34	Os06g0152100	Trichoblast2	1.07328	156
OG0001117	AT4G34580	Trichoblast1	2.92767	37	Os10g0122600	Trichoblast2	4.28408	6
OG0011021	AT1G30870	Trichoblast1	2.8987	40	Os07g0499500	Trichoblast2	4.55571	3
OG0014922	AT3G09925	Trichoblast1	2.8792	42	Os10g0546100	Trichoblast2	4.85883	2
OG0004504	AT2G04780	Trichoblast1	2.81547	45	Os09g0482780	Trichoblast2	1.29925	111
OG0000071	AT3G18780	Trichoblast1	2.71462	48	Os03g0718100	Trichoblast2	1.3863	95
OG0002431	AT1G05810	Trichoblast1	2.66314	50	Os08g0525000	Trichoblast2	1.85583	57
OG0000287	AT2G46860	Trichoblast1	2.25105	71	Os05g0114000	Trichoblast2	1.19823	127
OG0000287	AT2G46860	Trichoblast1	2.25105	71	Os05g0438500	Trichoblast2	1.10467	150
OG0000415	AT4G18430	Trichoblast1	2.23637	73	Os09g0327100	Trichoblast2	1.00082	174
OG0003010	AT1G62660	Trichoblast1	2.12324	77	Os04g0535600	Trichoblast2	3.01781	16
OG0003239	AT2G21045	Trichoblast1	2.05302	82	Os02g0102300	Trichoblast2	1.0074	173
OG0005934	AT2G27080	Trichoblast1	2.01056	85	Os01g0812100	Trichoblast2	2.19922	41
OG0003102	AT1G08340	Trichoblast1	1.93148	90	Os01g0967200	Trichoblast2	1.12901	144
OG0001399	AT4G26690	Trichoblast1	1.88551	96	Os04g0472300	Trichoblast2	1.30381	109
OG0000087	AT3G60330	Trichoblast1	1.8456	100	Os12g0638700	Trichoblast2	2.07391	47
OG0000087	AT4G30190	Trichoblast1	1.76762	108	Os12g0638700	Trichoblast2	2.07391	47
OG0002046	AT4G18640	Trichoblast1	1.76007	110	Os01g0674800	Trichoblast2	1.22089	122
OG0000124	AT1G78300	Trichoblast1	1.71855	116	Os08g0430500	Trichoblast2	1.31018	107
OG0001050	AT1G70410	Trichoblast1	1.68832	122	Os01g0639900	Trichoblast2	1.22668	119
OG0000071	AT1G49240	Trichoblast1	1.63069	136	Os03g0718100	Trichoblast2	1.3863	95
OG0000158	AT1G53680	Trichoblast1	1.58845	147	Os09g0367700	Trichoblast2	1.70484	72
OG0007409	AT1G54410	Trichoblast1	1.5525	157	Os03g0655400	Trichoblast2	1.77829	65
OG0004887	AT4G25570	Trichoblast1	1.51685	166	Os02g0642300	Trichoblast2	1.10655	149
OG0011073	AT1G48930	Trichoblast1	1.49552	171	Os04g0674800	Trichoblast2	3.9065	8
OG0004774	AT5G66280	Trichoblast1	1.39772	194	Os06g0137700	Trichoblast2	1.44242	89
OG0007946	AT1G62980	Trichoblast2	2.72561	1	Os10g0535900	Trichoblast1	1.55731	66
OG0007946	AT1G12560	Trichoblast2	2.61994	2	Os10g0535900	Trichoblast1	1.55731	66
OG0013196	AT5G05500	Trichoblast2	2.5488	3	Os01g0164075	Trichoblast1	2.12097	20
OG0013196	AT5G05500	Trichoblast2	2.5488	3	Os01g0164300	Trichoblast1	1.39731	80
OG0011021	AT1G30870	Trichoblast2	2.3733	7	Os07g0499500	Trichoblast1	2.96469	6
OG0000287	AT4G01480	Trichoblast2	2.3052	8	Os05g0438500	Trichoblast1	2.07827	21
OG0014922	AT3G09925	Trichoblast2	2.20062	10	Os10g0546100	Trichoblast1	2.68327	11
OG0001117	AT4G34580	Trichoblast2	2.05826	11	Os10g0122600	Trichoblast1	1.71217	48
OG0011073	AT1G48930	Trichoblast2	1.80924	19	Os04g0674800	Trichoblast1	2.71633	9
OG0009407	AT5G58010	Trichoblast2	1.78709	21	Os06g0184000	Trichoblast1	1.43507	75
OG0003086	AT1G01750	Trichoblast2	1.66042	27	Os02g0663800	Trichoblast1	3.43786	2
OG0003086	AT1G01750	Trichoblast2	1.66042	27	Os04g0555700	Trichoblast1	3.02528	5
OG0003086	AT4G00680	Trichoblast2	1.64588	31	Os02g0663800	Trichoblast1	3.43786	2
OG0003086	AT4G00680	Trichoblast2	1.64588	31	Os04g0555700	Trichoblast1	3.02528	5
OG0002431	AT1G05810	Trichoblast2	1.4925	48	Os08g0525000	Trichoblast1	2.29332	16
OG0002297	AT3G05490	Trichoblast2	1.46454	52	Os12g0541700	Trichoblast1	0.910465	186
OG0003258	AT3G56930	Trichoblast2	1.2166	86	Os01g0279000	Trichoblast1	1.0782	131
OG0000565	AT1G54290	Trichoblast2	1.20398	90	Os01g0794500	Trichoblast1	1.20398	107
OG0000087	AT3G60330	Trichoblast2	1.19957	91	Os12g0638700	Trichoblast1	1.64644	60
OG0000087	AT3G60330	Trichoblast2	1.19957	91	Os07g0191200	Trichoblast1	1.28302	92
OG0000825	AT1G70460	Trichoblast2	1.13573	106	Os06g0488050	Trichoblast1	1.21737	105
OG0000569	AT5G39320	Trichoblast2	1.1351	108	Os12g0443500	Trichoblast1	1.19193	109
OG0000071	AT3G18780	Trichoblast2	1.1279	114	Os03g0718100	Trichoblast1	0.999828	155
OG0003102	AT1G08340	Trichoblast2	1.07086	131	Os01g0967200	Trichoblast1	1.66479	52
OG0004825	AT3G21070	Trichoblast2	1.03722	139	Os01g0957000	Trichoblast1	1.05647	140
OG0000158	AT1G53680	Trichoblast2	1.01744	148	Os09g0367700	Trichoblast1	1.53522	68
OG0001974	AT5G16910	Trichoblast2	1.00818	152	Os10g0578200	Trichoblast1	2.4428	15
OG0000718	AT4G37640	Trichoblast2	1.00724	153	Os03g0203700	Trichoblast1	1.73873	42
OG0004887	AT4G25570	Trichoblast2	1.00655	154	Os02g0642300	Trichoblast1	1.08221	130
OG0000560	AT3G21510	Trichoblast2	0.981649	160	Os09g0567400	Trichoblast1	1.64829	58
OG0002949	AT1G75220	Trichoblast2	0.966061	168	Os05g0567800	Trichoblast1	1.01931	149
OG0000614	AT2G19760	Trichoblast2	0.954224	174	Os10g0323600	Trichoblast1	2.05182	23
OG0004904	AT4G21105	Trichoblast2	0.947807	178	Os07g0647500	Trichoblast1	0.954207	170
OG0000221	AT1G70490	Trichoblast2	0.906594	197	Os01g0265100	Trichoblast1	1.22341	103
OG0013196	AT5G05500	Trichoblast2	2.5488	3	Os01g0164300	Trichoblast2	3.3823	11
OG0013196	AT5G05500	Trichoblast2	2.5488	3	Os01g0164075	Trichoblast2	3.06999	15
OG0011021	AT1G30870	Trichoblast2	2.3733	7	Os07g0499500	Trichoblast2	4.55571	3
OG0000287	AT4G01480	Trichoblast2	2.3052	8	Os05g0114000	Trichoblast2	1.19823	127
OG0000287	AT4G01480	Trichoblast2	2.3052	8	Os05g0438500	Trichoblast2	1.10467	150
OG0014922	AT3G09925	Trichoblast2	2.20062	10	Os10g0546100	Trichoblast2	4.85883	2
OG0001117	AT4G34580	Trichoblast2	2.05826	11	Os10g0122600	Trichoblast2	4.28408	6
OG0011073	AT1G48930	Trichoblast2	1.80924	19	Os04g0674800	Trichoblast2	3.9065	8
OG0003086	AT1G01750	Trichoblast2	1.66042	27	Os02g0663800	Trichoblast2	2.44991	32
OG0003086	AT1G01750	Trichoblast2	1.66042	27	Os04g0555700	Trichoblast2	2.30537	37
OG0003086	AT4G00680	Trichoblast2	1.64588	31	Os02g0663800	Trichoblast2	2.44991	32
OG0003086	AT4G00680	Trichoblast2	1.64588	31	Os04g0555700	Trichoblast2	2.30537	37
OG0002431	AT1G05810	Trichoblast2	1.4925	48	Os08g0525000	Trichoblast2	1.85583	57
OG0003239	AT2G21045	Trichoblast2	1.44169	55	Os02g0102300	Trichoblast2	1.0074	173
OG0005934	AT2G27080	Trichoblast2	1.33207	69	Os01g0812100	Trichoblast2	2.19922	41
OG0003258	AT3G56930	Trichoblast2	1.2166	86	Os01g0279000	Trichoblast2	1.40178	94
OG0000087	AT3G60330	Trichoblast2	1.19957	91	Os12g0638700	Trichoblast2	2.07391	47
OG0000071	AT3G18780	Trichoblast2	1.1279	114	Os03g0718100	Trichoblast2	1.3863	95
OG0003010	AT1G62660	Trichoblast2	1.11623	120	Os04g0535600	Trichoblast2	3.01781	16
OG0003102	AT1G08340	Trichoblast2	1.07086	131	Os01g0967200	Trichoblast2	1.12901	144
OG0000261	AT2G44450	Trichoblast2	1.046	135	Os04g0474800	Trichoblast2	2.85689	18
OG0000158	AT1G53680	Trichoblast2	1.01744	148	Os09g0367700	Trichoblast2	1.70484	72
OG0001974	AT5G16910	Trichoblast2	1.00818	152	Os10g0578200	Trichoblast2	1.27717	114
OG0004887	AT4G25570	Trichoblast2	1.00655	154	Os02g0642300	Trichoblast2	1.10655	149
OG0001887	AT2G34500	Trichoblast2	1.00314	155	Os01g0211600	Trichoblast2	1.34852	102
OG0000614	AT2G19760	Trichoblast2	0.954224	174	Os06g0152100	Trichoblast2	1.07328	156
OG0006767	AT5G16510	Trichoblast2	0.904425	198	Os04g0660400	Trichoblast2	0.952082	187
OG0001138	AT2G43590	Atrichoblast1	2.61343	8	Os02g0605900	Atrichoblast	0.912266	149
OG0000250	AT1G14870	Atrichoblast1	2.18557	15	Os03g0830200	Atrichoblast	1.76562	33
OG0001440	AT3G29250	Atrichoblast1	1.9793	24	Os03g0833100	Atrichoblast	0.959999	133
OG0002322	AT1G78000	Atrichoblast1	1.96503	25	Os03g0195800	Atrichoblast	2.1291	21
OG0006447	AT5G41080	Atrichoblast1	1.49833	46	Os02g0514500	Atrichoblast	0.871145	163
OG0001299	AT1G14860	Atrichoblast1	1.27631	67	Os02g0734300	Atrichoblast	1.11846	103
OG0001299	AT2G01670	Atrichoblast1	1.22461	81	Os02g0734300	Atrichoblast	1.11846	103
OG0005885	AT2G38750	Atrichoblast1	1.22255	82	Os05g0382600	Atrichoblast	1.17462	88
OG0003239	AT5G66170	Atrichoblast1	1.21319	87	Os02g0102300	Atrichoblast	1.60684	42
OG0001064	AT1G47128	Atrichoblast1	1.00847	142	Os04g0670200	Atrichoblast	0.988057	127
OG0012468	AT4G10380	Atrichoblast1	0.975083	154	Os10g0513200	Atrichoblast	1.46933	54
OG0004162	AT2G33150	Atrichoblast1	0.947181	166	Os02g0817700	Atrichoblast	0.901693	154
OG0002007	AT3G11780	Atrichoblast1	0.898345	183	Os07g0159800	Atrichoblast	0.867369	164
OG0000898	AT5G59030	Atrichoblast1	0.895277	184	Os01g0770700	Atrichoblast	2.23227	16
OG0001984	AT4G13510	Atrichoblast1	0.881663	192	Os04g0509600	Atrichoblast	1.5958	46
OG0004105	AT1G27400	Atrichoblast2	1.91695	6	Os09g0258600	Endodermis	1.91846	17
OG0000905	AT2G37190	Atrichoblast2	1.91572	7	Os04g0598200	Endodermis	1.67177	54
OG0000905	AT2G37190	Atrichoblast2	1.91572	7	Os02g0699600	Endodermis	1.49045	119
OG0002512	AT2G18020	Atrichoblast2	1.91187	8	Os12g0567700	Endodermis	1.90062	20
OG0001301	AT2G32060	Atrichoblast2	1.90961	9	Os07g0229900	Endodermis	1.66513	57
OG0001301	AT2G32060	Atrichoblast2	1.90961	9	Os07g0150200	Endodermis	1.44069	132
OG0001173	AT5G02960	Atrichoblast2	1.89424	10	Os03g0818400	Endodermis	1.82818	28
OG0001173	AT5G02960	Atrichoblast2	1.89424	10	Os01g0834500	Endodermis	1.77294	35
OG0003476	AT3G60245	Atrichoblast2	1.89344	11	Os01g0679700	Endodermis	1.53859	99
OG0003476	AT3G60245	Atrichoblast2	1.89344	11	Os05g0557000	Endodermis	1.39876	151
OG0002614	AT5G27850	Atrichoblast2	1.84773	12	Os05g0155100	Endodermis	1.71161	44
OG0002614	AT5G27850	Atrichoblast2	1.84773	12	Os03g0341100	Endodermis	1.38379	155
OG0000377	AT2G27710	Atrichoblast2	1.84768	13	Os01g0191100	Endodermis	1.4307	135
OG0000377	AT2G27710	Atrichoblast2	1.84768	13	Os05g0445500	Endodermis	1.31591	173
OG0001454	AT3G62870	Atrichoblast2	1.84647	14	Os08g0326400	Endodermis	1.66061	61
OG0001454	AT3G62870	Atrichoblast2	1.84647	14	Os09g0507800	Endodermis	1.57293	82
OG0001759	AT5G22440	Atrichoblast2	1.84088	15	Os02g0321900	Endodermis	1.54471	97
OG0001759	AT5G22440	Atrichoblast2	1.84088	15	Os01g0860300	Endodermis	1.3204	170
OG0001290	AT1G09690	Atrichoblast2	1.82788	16	Os03g0141000	Endodermis	1.50955	111
OG0002612	AT3G07110	Atrichoblast2	1.8274	17	Os03g0756000	Endodermis	1.55754	91
OG0002612	AT3G07110	Atrichoblast2	1.8274	17	Os07g0109500	Endodermis	1.41856	140
OG0000746	AT5G45775	Atrichoblast2	1.82218	18	Os05g0207300	Endodermis	1.51452	106
OG0000746	AT5G45775	Atrichoblast2	1.82218	18	Os02g0235600	Endodermis	1.22512	198
OG0000746	AT5G45775	Atrichoblast2	1.82218	18	Os01g0205500	Endodermis	1.22252	200
OG0001301	AT1G15930	Atrichoblast2	1.82081	19	Os07g0229900	Endodermis	1.66513	57
OG0001301	AT1G15930	Atrichoblast2	1.82081	19	Os07g0150200	Endodermis	1.44069	132
OG0001567	AT4G16720	Atrichoblast2	1.79937	20	Os03g0598800	Endodermis	1.75334	40
OG0000932	AT4G34670	Atrichoblast2	1.77464	22	Os03g0200500	Endodermis	1.58805	78
OG0000932	AT4G34670	Atrichoblast2	1.77464	22	Os02g0287000	Endodermis	1.47398	123
OG0000932	AT4G34670	Atrichoblast2	1.77464	22	Os12g0406200	Endodermis	1.35057	163
OG0001806	AT3G16080	Atrichoblast2	1.77336	23	Os02g0111700	Endodermis	1.5738	81
OG0001806	AT3G16080	Atrichoblast2	1.77336	23	Os08g0128500	Endodermis	1.28669	183
OG0002288	AT3G62250	Atrichoblast2	1.76801	24	Os05g0160200	Endodermis	1.7398	42
OG0002288	AT3G62250	Atrichoblast2	1.76801	24	Os01g0328400	Endodermis	1.53275	101
OG0003646	AT5G57290	Atrichoblast2	1.76305	25	Os01g0231700	Endodermis	1.36643	160
OG0002811	AT5G15200	Atrichoblast2	1.74839	26	Os03g0154700	Endodermis	1.77047	36
OG0002811	AT5G15200	Atrichoblast2	1.74839	26	Os11g0602600	Endodermis	1.52129	103
OG0001485	AT5G18380	Atrichoblast2	1.74305	27	Os12g0124200	Endodermis	1.75744	38
OG0001485	AT5G18380	Atrichoblast2	1.74305	27	Os11g0127900	Endodermis	1.68089	52
OG0002550	AT4G27090	Atrichoblast2	1.73851	28	Os02g0622300	Endodermis	1.66267	59
OG0002550	AT4G27090	Atrichoblast2	1.73851	28	Os04g0515300	Endodermis	1.56735	85
OG0001982	AT3G22230	Atrichoblast2	1.73729	29	Os10g0564300	Endodermis	1.88998	21
OG0001982	AT3G22230	Atrichoblast2	1.73729	29	Os02g0284600	Endodermis	1.51155	108
OG0001732	AT2G34480	Atrichoblast2	1.72931	32	Os05g0565000	Endodermis	1.53039	102
OG0001732	AT2G34480	Atrichoblast2	1.72931	32	Os01g0752300	Endodermis	1.43742	133
OG0002462	AT3G53740	Atrichoblast2	1.72891	33	Os05g0459900	Endodermis	1.49481	117
OG0001745	AT1G77940	Atrichoblast2	1.72846	34	Os01g0276000	Endodermis	1.7773	34
OG0001745	AT1G77940	Atrichoblast2	1.72846	34	Os05g0490100	Endodermis	1.63051	69
OG0002658	AT5G39740	Atrichoblast2	1.72484	35	Os01g0896700	Endodermis	1.70737	47
OG0002658	AT5G39740	Atrichoblast2	1.72484	35	Os01g0896800	Endodermis	1.42942	136
OG0001863	AT2G39460	Atrichoblast2	1.70063	39	Os01g0348700	Endodermis	1.48305	122
OG0001863	AT2G39460	Atrichoblast2	1.70063	39	Os04g0501000	Endodermis	1.24731	191
OG0004023	AT1G70600	Atrichoblast2	1.69941	40	Os03g0408300	Endodermis	1.92565	16
OG0001045	AT2G41840	Atrichoblast2	1.69372	42	Os03g0807800	Endodermis	1.5487	95
OG0004105	AT1G67430	Atrichoblast2	1.69011	43	Os09g0258600	Endodermis	1.91846	17
OG0000905	AT5G60670	Atrichoblast2	1.68602	44	Os04g0598200	Endodermis	1.67177	54
OG0000905	AT5G60670	Atrichoblast2	1.68602	44	Os02g0699600	Endodermis	1.49045	119
OG0000924	AT2G01250	Atrichoblast2	1.67928	45	Os08g0234000	Endodermis	1.60479	74
OG0000924	AT2G01250	Atrichoblast2	1.67928	45	Os04g0605900	Endodermis	1.51533	105
OG0003344	AT2G21580	Atrichoblast2	1.6693	46	Os08g0559200	Endodermis	1.58884	77
OG0001863	AT3G55280	Atrichoblast2	1.66455	48	Os01g0348700	Endodermis	1.48305	122
OG0001863	AT3G55280	Atrichoblast2	1.66455	48	Os04g0501000	Endodermis	1.24731	191
OG0001982	AT4G15000	Atrichoblast2	1.64659	49	Os10g0564300	Endodermis	1.88998	21
OG0001982	AT4G15000	Atrichoblast2	1.64659	49	Os02g0284600	Endodermis	1.51155	108
OG0001127	AT3G09200	Atrichoblast2	1.64361	50	Os08g0130500	Endodermis	1.37387	157
OG0001954	AT4G00100	Atrichoblast2	1.64322	51	Os08g0117300	Endodermis	1.71948	43
OG0001759	AT1G08360	Atrichoblast2	1.63642	52	Os02g0321900	Endodermis	1.54471	97
OG0001759	AT1G08360	Atrichoblast2	1.63642	52	Os01g0860300	Endodermis	1.3204	170
OG0003358	AT2G36620	Atrichoblast2	1.63412	53	Os01g0815800	Endodermis	1.49776	116
OG0003358	AT2G36620	Atrichoblast2	1.63412	53	Os05g0486700	Endodermis	1.48577	121
OG0003432	AT3G45030	Atrichoblast2	1.61643	54	Os03g0249400	Endodermis	1.549	94
OG0003432	AT3G45030	Atrichoblast2	1.61643	54	Os10g0170200	Endodermis	1.41752	141
OG0002485	AT5G58420	Atrichoblast2	1.61405	55	Os01g0358400	Endodermis	1.83417	27
OG0002485	AT5G58420	Atrichoblast2	1.61405	55	Os02g0105900	Endodermis	1.33342	166
OG0002643	AT3G49010	Atrichoblast2	1.61054	56	Os03g0576700	Endodermis	1.62284	71
OG0002643	AT3G49010	Atrichoblast2	1.61054	56	Os06g0115500	Endodermis	1.41166	145
OG0001208	AT5G41520	Atrichoblast2	1.60523	57	Os01g0962600	Endodermis	1.56518	89
OG0001208	AT5G41520	Atrichoblast2	1.60523	57	Os04g0430100	Endodermis	1.40563	146
OG0000627	AT3G04920	Atrichoblast2	1.6044	58	Os01g0723200	Endodermis	1.63714	66
OG0000627	AT3G04920	Atrichoblast2	1.6044	58	Os02g0229000	Endodermis	1.39297	152
OG0000627	AT3G04920	Atrichoblast2	1.6044	58	Os06g0555400	Endodermis	1.3449	164
OG0002539	AT3G09500	Atrichoblast2	1.5965	60	Os04g0376000	Endodermis	1.41347	143
OG0001017	AT1G41880	Atrichoblast2	1.59501	61	Os02g0785800	Endodermis	1.42155	138
OG0001017	AT1G41880	Atrichoblast2	1.59501	61	Os05g0556900	Endodermis	1.40026	149
OG0001342	AT1G22780	Atrichoblast2	1.58856	62	Os03g0794700	Endodermis	1.74853	41
OG0001342	AT1G22780	Atrichoblast2	1.58856	62	Os07g0173501	Endodermis	1.30791	176
OG0000832	AT3G04400	Atrichoblast2	1.58023	63	Os03g0139100	Endodermis	1.62716	70
OG0000832	AT3G04400	Atrichoblast2	1.58023	63	Os10g0466700	Endodermis	1.50721	112
OG0000832	AT3G04400	Atrichoblast2	1.58023	63	Os02g0814700	Endodermis	1.46297	126
OG0000930	AT5G23740	Atrichoblast2	1.57591	65	Os04g0613600	Endodermis	1.81282	30
OG0000930	AT5G23740	Atrichoblast2	1.57591	65	Os07g0565100	Endodermis	1.79417	31
OG0000930	AT5G23740	Atrichoblast2	1.57591	65	Os07g0565000	Endodermis	1.56709	86
OG0001423	AT1G48630	Atrichoblast2	1.57196	66	Os05g0552300	Endodermis	2.00239	11
OG0001423	AT1G48630	Atrichoblast2	1.57196	66	Os01g0686800	Endodermis	1.35927	162
OG0002679	AT3G02080	Atrichoblast2	1.56866	67	Os03g0424800	Endodermis	1.86359	23
OG0002679	AT3G02080	Atrichoblast2	1.56866	67	Os03g0424500	Endodermis	1.61567	72
OG0001185	AT3G23390	Atrichoblast2	1.56497	69	Os07g0523700	Endodermis	1.68394	51
OG0001185	AT3G23390	Atrichoblast2	1.56497	69	Os07g0450000	Endodermis	1.22424	199
OG0001454	AT2G47610	Atrichoblast2	1.56273	70	Os08g0326400	Endodermis	1.66061	61
OG0001454	AT2G47610	Atrichoblast2	1.56273	70	Os09g0507800	Endodermis	1.57293	82
OG0001378	AT1G72370	Atrichoblast2	1.55832	71	Os03g0182600	Endodermis	1.55108	92
OG0002565	AT2G36160	Atrichoblast2	1.55494	72	Os02g0534800	Endodermis	1.60991	73
OG0002565	AT2G36160	Atrichoblast2	1.55494	72	Os02g0162500	Endodermis	1.56977	83
OG0002565	AT2G36160	Atrichoblast2	1.55494	72	Os04g0413600	Endodermis	1.31332	174
OG0000932	AT3G04840	Atrichoblast2	1.55392	73	Os03g0200500	Endodermis	1.58805	78
OG0000932	AT3G04840	Atrichoblast2	1.55392	73	Os02g0287000	Endodermis	1.47398	123
OG0000932	AT3G04840	Atrichoblast2	1.55392	73	Os12g0406200	Endodermis	1.35057	163
OG0002679	AT5G61170	Atrichoblast2	1.55223	74	Os03g0424800	Endodermis	1.86359	23
OG0002679	AT5G61170	Atrichoblast2	1.55223	74	Os03g0424500	Endodermis	1.61567	72
OG0000746	AT4G18730	Atrichoblast2	1.55009	75	Os05g0207300	Endodermis	1.51452	106
OG0000746	AT4G18730	Atrichoblast2	1.55009	75	Os02g0235600	Endodermis	1.22512	198
OG0000746	AT4G18730	Atrichoblast2	1.55009	75	Os01g0205500	Endodermis	1.22252	200
OG0001061	AT1G43170	Atrichoblast2	1.54954	77	Os11g0168200	Endodermis	1.49933	115
OG0001061	AT1G43170	Atrichoblast2	1.54954	77	Os12g0167900	Endodermis	1.40252	148
OG0000924	AT2G44120	Atrichoblast2	1.5415	78	Os08g0234000	Endodermis	1.60479	74
OG0000924	AT2G44120	Atrichoblast2	1.5415	78	Os04g0605900	Endodermis	1.51533	105
OG0003292	AT3G11940	Atrichoblast2	1.53458	79	Os01g0100700	Endodermis	1.84955	26
OG0003292	AT3G11940	Atrichoblast2	1.53458	79	Os11g0482000	Endodermis	1.43376	134
OG0001732	AT3G14600	Atrichoblast2	1.53187	80	Os05g0565000	Endodermis	1.53039	102
OG0001732	AT3G14600	Atrichoblast2	1.53187	80	Os01g0752300	Endodermis	1.43742	133
OG0002612	AT3G24830	Atrichoblast2	1.52266	81	Os03g0756000	Endodermis	1.55754	91
OG0002612	AT3G24830	Atrichoblast2	1.52266	81	Os07g0109500	Endodermis	1.41856	140
OG0001017	AT3G55750	Atrichoblast2	1.52127	82	Os02g0785800	Endodermis	1.42155	138
OG0001017	AT3G55750	Atrichoblast2	1.52127	82	Os05g0556900	Endodermis	1.40026	149
OG0001290	AT1G57660	Atrichoblast2	1.52023	83	Os03g0141000	Endodermis	1.50955	111
OG0001954	AT3G60770	Atrichoblast2	1.51711	84	Os08g0117300	Endodermis	1.71948	43
OG0001290	AT1G09590	Atrichoblast2	1.51701	85	Os03g0141000	Endodermis	1.50955	111
OG0001792	AT5G59850	Atrichoblast2	1.50948	86	Os07g0208000	Endodermis	1.91131	19
OG0001792	AT5G59850	Atrichoblast2	1.50948	86	Os02g0478600	Endodermis	1.66326	58
OG0002622	AT3G05560	Atrichoblast2	1.50612	87	Os07g0674200	Endodermis	1.51329	107
OG0002622	AT3G05560	Atrichoblast2	1.50612	87	Os03g0343500	Endodermis	1.25632	189
OG0000377	AT2G27720	Atrichoblast2	1.50432	88	Os01g0191100	Endodermis	1.4307	135
OG0000377	AT2G27720	Atrichoblast2	1.50432	88	Os05g0445500	Endodermis	1.31591	173
OG0002485	AT5G07090	Atrichoblast2	1.49987	89	Os01g0358400	Endodermis	1.83417	27
OG0002485	AT5G07090	Atrichoblast2	1.49987	89	Os02g0105900	Endodermis	1.33342	166
OG0002658	AT3G25520	Atrichoblast2	1.49875	90	Os01g0896700	Endodermis	1.70737	47
OG0002658	AT3G25520	Atrichoblast2	1.49875	90	Os01g0896800	Endodermis	1.42942	136
OG0002481	AT3G56340	Atrichoblast2	1.49534	91	Os05g0477300	Endodermis	1.5016	114
OG0002481	AT3G56340	Atrichoblast2	1.49534	91	Os01g0823300	Endodermis	1.36816	159
OG0001567	AT4G17390	Atrichoblast2	1.48766	93	Os03g0598800	Endodermis	1.75334	40
OG0000591	AT4G10450	Atrichoblast2	1.48585	94	Os09g0485900	Endodermis	1.38602	154
OG0003344	AT4G39200	Atrichoblast2	1.48183	95	Os08g0559200	Endodermis	1.58884	77
OG0002565	AT3G11510	Atrichoblast2	1.4728	96	Os02g0534800	Endodermis	1.60991	73
OG0002565	AT3G11510	Atrichoblast2	1.4728	96	Os02g0162500	Endodermis	1.56977	83
OG0002565	AT3G11510	Atrichoblast2	1.4728	96	Os04g0413600	Endodermis	1.31332	174
OG0001335	AT5G09510	Atrichoblast2	1.4706	97	Os03g0798600	Endodermis	1.36046	161
OG0003358	AT3G53020	Atrichoblast2	1.46959	98	Os01g0815800	Endodermis	1.49776	116
OG0003358	AT3G53020	Atrichoblast2	1.46959	98	Os05g0486700	Endodermis	1.48577	121
OG0006226	AT3G61110	Atrichoblast2	1.46487	101	Os02g0478700	Endodermis	1.71033	45
OG0001374	AT1G18540	Atrichoblast2	1.45582	102	Os04g0473400	Endodermis	1.54715	96
OG0001374	AT1G18540	Atrichoblast2	1.45582	102	Os02g0591700	Endodermis	1.26645	187
OG0002462	AT5G02450	Atrichoblast2	1.45401	103	Os05g0459900	Endodermis	1.49481	117
OG0000591	AT1G33120	Atrichoblast2	1.44806	104	Os09g0485900	Endodermis	1.38602	154
OG0006060	AT2G43460	Atrichoblast2	1.44464	105	Os07g0546700	Endodermis	1.76947	37
OG0006060	AT2G43460	Atrichoblast2	1.44464	105	Os11g0433900	Endodermis	1.60247	75
OG0002512	AT4G36130	Atrichoblast2	1.44166	106	Os12g0567700	Endodermis	1.90062	20
OG0002631	AT3G49910	Atrichoblast2	1.44043	108	Os12g0150100	Endodermis	1.5793	80
OG0002631	AT3G49910	Atrichoblast2	1.44043	108	Os11g0151300	Endodermis	1.36889	158
OG0003292	AT2G37270	Atrichoblast2	1.43719	109	Os01g0100700	Endodermis	1.84955	26
OG0003292	AT2G37270	Atrichoblast2	1.43719	109	Os11g0482000	Endodermis	1.43376	134
OG0003604	AT4G18100	Atrichoblast2	1.42424	111	Os09g0501200	Endodermis	1.42692	137
OG0006060	AT3G59540	Atrichoblast2	1.42325	113	Os07g0546700	Endodermis	1.76947	37
OG0006060	AT3G59540	Atrichoblast2	1.42325	113	Os11g0433900	Endodermis	1.60247	75
OG0001806	AT1G52300	Atrichoblast2	1.4162	114	Os02g0111700	Endodermis	1.5738	81
OG0001806	AT1G52300	Atrichoblast2	1.4162	114	Os08g0128500	Endodermis	1.28669	183
OG0000627	AT5G28060	Atrichoblast2	1.41591	115	Os01g0723200	Endodermis	1.63714	66
OG0000627	AT5G28060	Atrichoblast2	1.41591	115	Os02g0229000	Endodermis	1.39297	152
OG0000627	AT5G28060	Atrichoblast2	1.41591	115	Os06g0555400	Endodermis	1.3449	164
OG0001158	AT5G27700	Atrichoblast2	1.40895	116	Os03g0345200	Endodermis	1.51009	109
OG0002614	AT3G05590	Atrichoblast2	1.40866	117	Os05g0155100	Endodermis	1.71161	44
OG0002614	AT3G05590	Atrichoblast2	1.40866	117	Os03g0341100	Endodermis	1.38379	155
OG0000930	AT3G48930	Atrichoblast2	1.40532	118	Os04g0613600	Endodermis	1.81282	30
OG0000930	AT3G48930	Atrichoblast2	1.40532	118	Os07g0565100	Endodermis	1.79417	31
OG0000930	AT3G48930	Atrichoblast2	1.40532	118	Os07g0565000	Endodermis	1.56709	86
OG0004358	AT1G30230	Atrichoblast2	1.39569	122	Os07g0614500	Endodermis	1.71027	46
OG0002288	AT2G47110	Atrichoblast2	1.38083	125	Os05g0160200	Endodermis	1.7398	42
OG0002288	AT2G47110	Atrichoblast2	1.38083	125	Os01g0328400	Endodermis	1.53275	101
OG0001328	AT1G69620	Atrichoblast2	1.37778	126	Os08g0156800	Endodermis	1.56597	87
OG0001328	AT1G69620	Atrichoblast2	1.37778	126	Os08g0436800	Endodermis	1.41745	142
OG0004675	AT5G64140	Atrichoblast2	1.37747	127	Os10g0411700	Endodermis	1.58195	79
OG0001717	AT1G02780	Atrichoblast2	1.37261	128	Os03g0337800	Endodermis	1.42131	139
OG0001335	AT1G04270	Atrichoblast2	1.3657	129	Os03g0798600	Endodermis	1.36046	161
OG0001208	AT5G52650	Atrichoblast2	1.34639	133	Os01g0962600	Endodermis	1.56518	89
OG0001208	AT5G52650	Atrichoblast2	1.34639	133	Os04g0430100	Endodermis	1.40563	146
OG0002622	AT5G27770	Atrichoblast2	1.34489	134	Os07g0674200	Endodermis	1.51329	107
OG0002622	AT5G27770	Atrichoblast2	1.34489	134	Os03g0343500	Endodermis	1.25632	189
OG0001759	AT2G27530	Atrichoblast2	1.34262	135	Os02g0321900	Endodermis	1.54471	97
OG0001759	AT2G27530	Atrichoblast2	1.34262	135	Os01g0860300	Endodermis	1.3204	170
OG0000591	AT1G33140	Atrichoblast2	1.34152	136	Os09g0485900	Endodermis	1.38602	154
OG0004675	AT5G03850	Atrichoblast2	1.34095	137	Os10g0411700	Endodermis	1.58195	79
OG0001328	AT3G28900	Atrichoblast2	1.34075	138	Os08g0156800	Endodermis	1.56597	87
OG0001328	AT3G28900	Atrichoblast2	1.34075	138	Os08g0436800	Endodermis	1.41745	142
OG0001913	AT2G05220	Atrichoblast2	1.32744	142	Os03g0109500	Endodermis	1.75517	39
OG0001913	AT2G05220	Atrichoblast2	1.32744	142	Os10g0411800	Endodermis	1.56945	84
OG0009419	AT5G19510	Atrichoblast2	1.30797	144	Os07g0662500	Endodermis	1.40296	147
OG0001445	AT3G53870	Atrichoblast2	1.30747	145	Os03g0577000	Endodermis	1.44243	131
OG0001913	AT5G04800	Atrichoblast2	1.30233	146	Os03g0109500	Endodermis	1.75517	39
OG0001913	AT5G04800	Atrichoblast2	1.30233	146	Os10g0411800	Endodermis	1.56945	84
OG0001485	AT2G09990	Atrichoblast2	1.28835	149	Os12g0124200	Endodermis	1.75744	38
OG0001485	AT2G09990	Atrichoblast2	1.28835	149	Os11g0127900	Endodermis	1.68089	52
OG0001445	AT5G35530	Atrichoblast2	1.26648	155	Os03g0577000	Endodermis	1.44243	131
OG0001342	AT1G34030	Atrichoblast2	1.25387	158	Os03g0794700	Endodermis	1.74853	41
OG0001342	AT1G34030	Atrichoblast2	1.25387	158	Os07g0173501	Endodermis	1.30791	176
OG0003432	AT5G62300	Atrichoblast2	1.23863	160	Os03g0249400	Endodermis	1.549	94
OG0003432	AT5G62300	Atrichoblast2	1.23863	160	Os10g0170200	Endodermis	1.41752	141
OG0001745	AT3G18740	Atrichoblast2	1.23482	161	Os01g0276000	Endodermis	1.7773	34
OG0001745	AT3G18740	Atrichoblast2	1.23482	161	Os05g0490100	Endodermis	1.63051	69
OG0000832	AT2G33370	Atrichoblast2	1.23292	162	Os03g0139100	Endodermis	1.62716	70
OG0000832	AT2G33370	Atrichoblast2	1.23292	162	Os10g0466700	Endodermis	1.50721	112
OG0000832	AT2G33370	Atrichoblast2	1.23292	162	Os02g0814700	Endodermis	1.46297	126
OG0000746	AT3G58700	Atrichoblast2	1.22574	164	Os05g0207300	Endodermis	1.51452	106
OG0000746	AT3G58700	Atrichoblast2	1.22574	164	Os02g0235600	Endodermis	1.22512	198
OG0000746	AT3G58700	Atrichoblast2	1.22574	164	Os01g0205500	Endodermis	1.22252	200
OG0001208	AT4G25740	Atrichoblast2	1.21894	166	Os01g0962600	Endodermis	1.56518	89
OG0001208	AT4G25740	Atrichoblast2	1.21894	166	Os04g0430100	Endodermis	1.40563	146
OG0004023	AT1G23290	Atrichoblast2	1.21741	167	Os03g0408300	Endodermis	1.92565	16
OG0003432	AT3G47370	Atrichoblast2	1.21127	169	Os03g0249400	Endodermis	1.549	94
OG0003432	AT3G47370	Atrichoblast2	1.21127	169	Os10g0170200	Endodermis	1.41752	141
OG0001912	AT2G19750	Atrichoblast2	1.20097	170	Os06g0172600	Endodermis	1.54145	98
OG0002485	AT2G17360	Atrichoblast2	1.1791	174	Os01g0358400	Endodermis	1.83417	27
OG0002485	AT2G17360	Atrichoblast2	1.1791	174	Os02g0105900	Endodermis	1.33342	166
OG0001531	AT5G02870	Atrichoblast2	1.17148	176	Os07g0180900	Endodermis	1.50988	110
OG0001531	AT5G02870	Atrichoblast2	1.17148	176	Os03g0796501	Endodermis	1.4437	130
OG0001445	AT2G31610	Atrichoblast2	1.16758	177	Os03g0577000	Endodermis	1.44243	131
OG0001912	AT4G29390	Atrichoblast2	1.16725	178	Os06g0172600	Endodermis	1.54145	98
OG0001342	AT4G09800	Atrichoblast2	1.15858	179	Os03g0794700	Endodermis	1.74853	41
OG0001342	AT4G09800	Atrichoblast2	1.15858	179	Os07g0173501	Endodermis	1.30791	176
OG0001158	AT3G53890	Atrichoblast2	1.15117	181	Os03g0345200	Endodermis	1.51009	109
OG0002481	AT2G40590	Atrichoblast2	1.1463	184	Os05g0477300	Endodermis	1.5016	114
OG0002481	AT2G40590	Atrichoblast2	1.1463	184	Os01g0823300	Endodermis	1.36816	159
OG0001792	AT1G07770	Atrichoblast2	1.14015	186	Os07g0208000	Endodermis	1.91131	19
OG0001792	AT1G07770	Atrichoblast2	1.14015	186	Os02g0478600	Endodermis	1.66326	58
OG0001290	AT1G57860	Atrichoblast2	1.13814	187	Os03g0141000	Endodermis	1.50955	111
OG0003610	AT4G31700	Atrichoblast2	1.13795	188	Os07g0622100	Endodermis	1.63704	67
OG0000905	AT3G53430	Atrichoblast2	1.13087	191	Os04g0598200	Endodermis	1.67177	54
OG0000905	AT3G53430	Atrichoblast2	1.13087	191	Os02g0699600	Endodermis	1.49045	119
OG0001792	AT3G46040	Atrichoblast2	1.10714	199	Os07g0208000	Endodermis	1.91131	19
OG0001792	AT3G46040	Atrichoblast2	1.10714	199	Os02g0478600	Endodermis	1.66326	58
OG0001993	AT5G22650	Atrichoblast2	1.10419	200	Os05g0597100	Endodermis	1.65502	63
OG0004105	AT1G27400	Atrichoblast2	1.91695	6	Os09g0258600	Meristem	1.51969	25
OG0000905	AT2G37190	Atrichoblast2	1.91572	7	Os02g0699600	Meristem	1.42195	55
OG0000905	AT2G37190	Atrichoblast2	1.91572	7	Os04g0598200	Meristem	1.41274	58
OG0002512	AT2G18020	Atrichoblast2	1.91187	8	Os12g0567700	Meristem	1.54647	23
OG0001301	AT2G32060	Atrichoblast2	1.90961	9	Os07g0229900	Meristem	1.51185	28
OG0001301	AT2G32060	Atrichoblast2	1.90961	9	Os07g0150200	Meristem	1.23323	126
OG0001173	AT5G02960	Atrichoblast2	1.89424	10	Os01g0834500	Meristem	1.48483	36
OG0001173	AT5G02960	Atrichoblast2	1.89424	10	Os03g0818400	Meristem	1.42407	53
OG0003476	AT3G60245	Atrichoblast2	1.89344	11	Os05g0557000	Meristem	1.28932	104
OG0003476	AT3G60245	Atrichoblast2	1.89344	11	Os01g0679700	Meristem	1.18559	148
OG0002614	AT5G27850	Atrichoblast2	1.84773	12	Os05g0155100	Meristem	1.59781	15
OG0002614	AT5G27850	Atrichoblast2	1.84773	12	Os03g0341100	Meristem	1.1538	154
OG0000377	AT2G27710	Atrichoblast2	1.84768	13	Os01g0191100	Meristem	1.5116	29
OG0000377	AT2G27710	Atrichoblast2	1.84768	13	Os05g0445500	Meristem	1.07664	181
OG0000377	AT2G27710	Atrichoblast2	1.84768	13	Os02g0529700	Meristem	1.01758	199
OG0001454	AT3G62870	Atrichoblast2	1.84647	14	Os08g0326400	Meristem	1.47218	38
OG0001454	AT3G62870	Atrichoblast2	1.84647	14	Os09g0507800	Meristem	1.47025	39
OG0001759	AT5G22440	Atrichoblast2	1.84088	15	Os02g0321900	Meristem	1.34815	82
OG0001759	AT5G22440	Atrichoblast2	1.84088	15	Os01g0860300	Meristem	1.02678	195
OG0001290	AT1G09690	Atrichoblast2	1.82788	16	Os03g0141000	Meristem	1.47289	37
OG0002612	AT3G07110	Atrichoblast2	1.8274	17	Os03g0756000	Meristem	1.46814	40
OG0002612	AT3G07110	Atrichoblast2	1.8274	17	Os07g0109500	Meristem	1.16942	151
OG0000746	AT5G45775	Atrichoblast2	1.82218	18	Os05g0207300	Meristem	1.37885	70
OG0000746	AT5G45775	Atrichoblast2	1.82218	18	Os01g0205500	Meristem	1.24667	120
OG0001301	AT1G15930	Atrichoblast2	1.82081	19	Os07g0229900	Meristem	1.51185	28
OG0001301	AT1G15930	Atrichoblast2	1.82081	19	Os07g0150200	Meristem	1.23323	126
OG0001567	AT4G16720	Atrichoblast2	1.79937	20	Os03g0598800	Meristem	1.61668	14
OG0000932	AT4G34670	Atrichoblast2	1.77464	22	Os03g0200500	Meristem	1.45908	41
OG0000932	AT4G34670	Atrichoblast2	1.77464	22	Os12g0406200	Meristem	1.20093	140
OG0000932	AT4G34670	Atrichoblast2	1.77464	22	Os02g0287000	Meristem	1.14977	156
OG0001806	AT3G16080	Atrichoblast2	1.77336	23	Os02g0111700	Meristem	1.22708	131
OG0001806	AT3G16080	Atrichoblast2	1.77336	23	Os08g0128500	Meristem	1.09108	177
OG0002288	AT3G62250	Atrichoblast2	1.76801	24	Os05g0160200	Meristem	1.55877	21
OG0002288	AT3G62250	Atrichoblast2	1.76801	24	Os01g0328400	Meristem	1.41156	59
OG0003646	AT5G57290	Atrichoblast2	1.76305	25	Os01g0231700	Meristem	1.34394	83
OG0002811	AT5G15200	Atrichoblast2	1.74839	26	Os03g0154700	Meristem	1.51123	30
OG0002811	AT5G15200	Atrichoblast2	1.74839	26	Os11g0602600	Meristem	1.36539	75
OG0001485	AT5G18380	Atrichoblast2	1.74305	27	Os11g0127900	Meristem	1.43786	48
OG0001485	AT5G18380	Atrichoblast2	1.74305	27	Os12g0124200	Meristem	1.31003	95
OG0002550	AT4G27090	Atrichoblast2	1.73851	28	Os02g0622300	Meristem	1.52604	24
OG0002550	AT4G27090	Atrichoblast2	1.73851	28	Os04g0515300	Meristem	1.11683	167
OG0001982	AT3G22230	Atrichoblast2	1.73729	29	Os10g0564300	Meristem	1.58167	20
OG0001982	AT3G22230	Atrichoblast2	1.73729	29	Os02g0284600	Meristem	1.35899	79
OG0001732	AT2G34480	Atrichoblast2	1.72931	32	Os01g0752300	Meristem	1.27305	111
OG0001732	AT2G34480	Atrichoblast2	1.72931	32	Os05g0565000	Meristem	1.05241	188
OG0002462	AT3G53740	Atrichoblast2	1.72891	33	Os05g0459900	Meristem	1.12535	164
OG0001745	AT1G77940	Atrichoblast2	1.72846	34	Os05g0490100	Meristem	1.50526	31
OG0001745	AT1G77940	Atrichoblast2	1.72846	34	Os01g0276000	Meristem	1.36855	74
OG0002658	AT5G39740	Atrichoblast2	1.72484	35	Os01g0896700	Meristem	1.45854	42
OG0002658	AT5G39740	Atrichoblast2	1.72484	35	Os01g0896800	Meristem	1.18678	146
OG0002605	AT4G13850	Atrichoblast2	1.70119	38	Os01g0916600	Meristem	1.30377	97
OG0001863	AT2G39460	Atrichoblast2	1.70063	39	Os01g0348700	Meristem	1.31423	92
OG0001863	AT2G39460	Atrichoblast2	1.70063	39	Os04g0501000	Meristem	1.24931	118
OG0004023	AT1G70600	Atrichoblast2	1.69941	40	Os03g0408300	Meristem	1.62725	11
OG0001045	AT2G41840	Atrichoblast2	1.69372	42	Os03g0807800	Meristem	1.44867	46
OG0004105	AT1G67430	Atrichoblast2	1.69011	43	Os09g0258600	Meristem	1.51969	25
OG0000905	AT5G60670	Atrichoblast2	1.68602	44	Os02g0699600	Meristem	1.42195	55
OG0000905	AT5G60670	Atrichoblast2	1.68602	44	Os04g0598200	Meristem	1.41274	58
OG0000924	AT2G01250	Atrichoblast2	1.67928	45	Os08g0234000	Meristem	1.45319	43
OG0000924	AT2G01250	Atrichoblast2	1.67928	45	Os04g0605900	Meristem	1.25145	116
OG0003344	AT2G21580	Atrichoblast2	1.6693	46	Os08g0559200	Meristem	1.40715	60
OG0001863	AT3G55280	Atrichoblast2	1.66455	48	Os01g0348700	Meristem	1.31423	92
OG0001863	AT3G55280	Atrichoblast2	1.66455	48	Os04g0501000	Meristem	1.24931	118
OG0001982	AT4G15000	Atrichoblast2	1.64659	49	Os10g0564300	Meristem	1.58167	20
OG0001982	AT4G15000	Atrichoblast2	1.64659	49	Os02g0284600	Meristem	1.35899	79
OG0001127	AT3G09200	Atrichoblast2	1.64361	50	Os08g0130500	Meristem	1.32803	86
OG0001954	AT4G00100	Atrichoblast2	1.64322	51	Os08g0117300	Meristem	1.59571	17
OG0001759	AT1G08360	Atrichoblast2	1.63642	52	Os02g0321900	Meristem	1.34815	82
OG0001759	AT1G08360	Atrichoblast2	1.63642	52	Os01g0860300	Meristem	1.02678	195
OG0003358	AT2G36620	Atrichoblast2	1.63412	53	Os01g0815800	Meristem	1.3117	94
OG0003432	AT3G45030	Atrichoblast2	1.61643	54	Os10g0170200	Meristem	1.285	106
OG0003432	AT3G45030	Atrichoblast2	1.61643	54	Os03g0249400	Meristem	1.22509	132
OG0002485	AT5G58420	Atrichoblast2	1.61405	55	Os01g0358400	Meristem	1.37589	71
OG0002485	AT5G58420	Atrichoblast2	1.61405	55	Os02g0105900	Meristem	1.23214	128
OG0002643	AT3G49010	Atrichoblast2	1.61054	56	Os03g0576700	Meristem	1.3794	69
OG0002643	AT3G49010	Atrichoblast2	1.61054	56	Os06g0115500	Meristem	1.2924	102
OG0001208	AT5G41520	Atrichoblast2	1.60523	57	Os01g0962600	Meristem	1.37005	73
OG0001208	AT5G41520	Atrichoblast2	1.60523	57	Os04g0430100	Meristem	1.28177	107
OG0000627	AT3G04920	Atrichoblast2	1.6044	58	Os01g0723200	Meristem	1.62206	12
OG0000627	AT3G04920	Atrichoblast2	1.6044	58	Os06g0555400	Meristem	1.26034	115
OG0000627	AT3G04920	Atrichoblast2	1.6044	58	Os02g0229000	Meristem	1.17414	149
OG0002539	AT3G09500	Atrichoblast2	1.5965	60	Os04g0376000	Meristem	1.24765	119
OG0001017	AT1G41880	Atrichoblast2	1.59501	61	Os05g0556900	Meristem	1.39569	63
OG0001017	AT1G41880	Atrichoblast2	1.59501	61	Os02g0785800	Meristem	1.04968	189
OG0001342	AT1G22780	Atrichoblast2	1.58856	62	Os03g0794700	Meristem	1.34058	84
OG0001342	AT1G22780	Atrichoblast2	1.58856	62	Os07g0173501	Meristem	1.2636	114
OG0000832	AT3G04400	Atrichoblast2	1.58023	63	Os03g0139100	Meristem	1.66476	6
OG0000832	AT3G04400	Atrichoblast2	1.58023	63	Os02g0814700	Meristem	1.42509	51
OG0000832	AT3G04400	Atrichoblast2	1.58023	63	Os10g0466700	Meristem	1.15217	155
OG0000930	AT5G23740	Atrichoblast2	1.57591	65	Os07g0565100	Meristem	1.51242	27
OG0000930	AT5G23740	Atrichoblast2	1.57591	65	Os04g0613600	Meristem	1.41937	57
OG0000930	AT5G23740	Atrichoblast2	1.57591	65	Os07g0565000	Meristem	1.35914	78
OG0001423	AT1G48630	Atrichoblast2	1.57196	66	Os01g0686800	Meristem	1.21733	134
OG0001423	AT1G48630	Atrichoblast2	1.57196	66	Os05g0552300	Meristem	1.0746	182
OG0002679	AT3G02080	Atrichoblast2	1.56866	67	Os03g0424800	Meristem	1.63578	9
OG0002679	AT3G02080	Atrichoblast2	1.56866	67	Os03g0424500	Meristem	1.59061	18
OG0001185	AT3G23390	Atrichoblast2	1.56497	69	Os07g0523700	Meristem	1.38336	66
OG0001185	AT3G23390	Atrichoblast2	1.56497	69	Os07g0450000	Meristem	1.07921	180
OG0001454	AT2G47610	Atrichoblast2	1.56273	70	Os08g0326400	Meristem	1.47218	38
OG0001454	AT2G47610	Atrichoblast2	1.56273	70	Os09g0507800	Meristem	1.47025	39
OG0001378	AT1G72370	Atrichoblast2	1.55832	71	Os03g0182600	Meristem	1.29121	103
OG0001378	AT1G72370	Atrichoblast2	1.55832	71	Os07g0616600	Meristem	1.14737	159
OG0002565	AT2G36160	Atrichoblast2	1.55494	72	Os02g0534800	Meristem	1.38879	65
OG0002565	AT2G36160	Atrichoblast2	1.55494	72	Os04g0413600	Meristem	1.26429	113
OG0002565	AT2G36160	Atrichoblast2	1.55494	72	Os02g0162500	Meristem	1.20734	138
OG0000932	AT3G04840	Atrichoblast2	1.55392	73	Os03g0200500	Meristem	1.45908	41
OG0000932	AT3G04840	Atrichoblast2	1.55392	73	Os12g0406200	Meristem	1.20093	140
OG0000932	AT3G04840	Atrichoblast2	1.55392	73	Os02g0287000	Meristem	1.14977	156
OG0002679	AT5G61170	Atrichoblast2	1.55223	74	Os03g0424800	Meristem	1.63578	9
OG0002679	AT5G61170	Atrichoblast2	1.55223	74	Os03g0424500	Meristem	1.59061	18
OG0000746	AT4G18730	Atrichoblast2	1.55009	75	Os05g0207300	Meristem	1.37885	70
OG0000746	AT4G18730	Atrichoblast2	1.55009	75	Os01g0205500	Meristem	1.24667	120
OG0001061	AT1G43170	Atrichoblast2	1.54954	77	Os11g0168200	Meristem	1.42853	50
OG0001061	AT1G43170	Atrichoblast2	1.54954	77	Os12g0167900	Meristem	1.39743	62
OG0000924	AT2G44120	Atrichoblast2	1.5415	78	Os08g0234000	Meristem	1.45319	43
OG0000924	AT2G44120	Atrichoblast2	1.5415	78	Os04g0605900	Meristem	1.25145	116
OG0003292	AT3G11940	Atrichoblast2	1.53458	79	Os01g0100700	Meristem	1.4998	32
OG0003292	AT3G11940	Atrichoblast2	1.53458	79	Os11g0482000	Meristem	1.22799	130
OG0001732	AT3G14600	Atrichoblast2	1.53187	80	Os01g0752300	Meristem	1.27305	111
OG0001732	AT3G14600	Atrichoblast2	1.53187	80	Os05g0565000	Meristem	1.05241	188
OG0002612	AT3G24830	Atrichoblast2	1.52266	81	Os03g0756000	Meristem	1.46814	40
OG0002612	AT3G24830	Atrichoblast2	1.52266	81	Os07g0109500	Meristem	1.16942	151
OG0001017	AT3G55750	Atrichoblast2	1.52127	82	Os05g0556900	Meristem	1.39569	63
OG0001017	AT3G55750	Atrichoblast2	1.52127	82	Os02g0785800	Meristem	1.04968	189
OG0001290	AT1G57660	Atrichoblast2	1.52023	83	Os03g0141000	Meristem	1.47289	37
OG0001954	AT3G60770	Atrichoblast2	1.51711	84	Os08g0117300	Meristem	1.59571	17
OG0001290	AT1G09590	Atrichoblast2	1.51701	85	Os03g0141000	Meristem	1.47289	37
OG0001792	AT5G59850	Atrichoblast2	1.50948	86	Os07g0208000	Meristem	1.45244	45
OG0001792	AT5G59850	Atrichoblast2	1.50948	86	Os02g0478600	Meristem	1.37101	72
OG0002622	AT3G05560	Atrichoblast2	1.50612	87	Os07g0674200	Meristem	1.30139	98
OG0002622	AT3G05560	Atrichoblast2	1.50612	87	Os03g0343500	Meristem	1.09831	173
OG0000377	AT2G27720	Atrichoblast2	1.50432	88	Os01g0191100	Meristem	1.5116	29
OG0000377	AT2G27720	Atrichoblast2	1.50432	88	Os05g0445500	Meristem	1.07664	181
OG0000377	AT2G27720	Atrichoblast2	1.50432	88	Os02g0529700	Meristem	1.01758	199
OG0002485	AT5G07090	Atrichoblast2	1.49987	89	Os01g0358400	Meristem	1.37589	71
OG0002485	AT5G07090	Atrichoblast2	1.49987	89	Os02g0105900	Meristem	1.23214	128
OG0002658	AT3G25520	Atrichoblast2	1.49875	90	Os01g0896700	Meristem	1.45854	42
OG0002658	AT3G25520	Atrichoblast2	1.49875	90	Os01g0896800	Meristem	1.18678	146
OG0002481	AT3G56340	Atrichoblast2	1.49534	91	Os05g0477300	Meristem	1.3528	81
OG0002481	AT3G56340	Atrichoblast2	1.49534	91	Os01g0823300	Meristem	1.19337	144
OG0001567	AT4G17390	Atrichoblast2	1.48766	93	Os03g0598800	Meristem	1.61668	14
OG0000591	AT4G10450	Atrichoblast2	1.48585	94	Os09g0485900	Meristem	1.23946	123
OG0000591	AT4G10450	Atrichoblast2	1.48585	94	Os02g0103700	Meristem	1.13462	160
OG0003344	AT4G39200	Atrichoblast2	1.48183	95	Os08g0559200	Meristem	1.40715	60
OG0002565	AT3G11510	Atrichoblast2	1.4728	96	Os02g0534800	Meristem	1.38879	65
OG0002565	AT3G11510	Atrichoblast2	1.4728	96	Os04g0413600	Meristem	1.26429	113
OG0002565	AT3G11510	Atrichoblast2	1.4728	96	Os02g0162500	Meristem	1.20734	138
OG0001335	AT5G09510	Atrichoblast2	1.4706	97	Os03g0798600	Meristem	1.27469	109
OG0003358	AT3G53020	Atrichoblast2	1.46959	98	Os01g0815800	Meristem	1.3117	94
OG0006226	AT3G61110	Atrichoblast2	1.46487	101	Os02g0478700	Meristem	1.59572	16
OG0001374	AT1G18540	Atrichoblast2	1.45582	102	Os04g0473400	Meristem	1.38203	67
OG0001374	AT1G18540	Atrichoblast2	1.45582	102	Os02g0591700	Meristem	1.25026	117
OG0002462	AT5G02450	Atrichoblast2	1.45401	103	Os05g0459900	Meristem	1.12535	164
OG0000591	AT1G33120	Atrichoblast2	1.44806	104	Os09g0485900	Meristem	1.23946	123
OG0000591	AT1G33120	Atrichoblast2	1.44806	104	Os02g0103700	Meristem	1.13462	160
OG0006060	AT2G43460	Atrichoblast2	1.44464	105	Os07g0546700	Meristem	1.23647	124
OG0006060	AT2G43460	Atrichoblast2	1.44464	105	Os11g0433900	Meristem	1.19722	142
OG0002512	AT4G36130	Atrichoblast2	1.44166	106	Os12g0567700	Meristem	1.54647	23
OG0002631	AT3G49910	Atrichoblast2	1.44043	108	Os11g0151300	Meristem	1.22505	133
OG0002631	AT3G49910	Atrichoblast2	1.44043	108	Os12g0150100	Meristem	1.11745	166
OG0003292	AT2G37270	Atrichoblast2	1.43719	109	Os01g0100700	Meristem	1.4998	32
OG0003292	AT2G37270	Atrichoblast2	1.43719	109	Os11g0482000	Meristem	1.22799	130
OG0003604	AT4G18100	Atrichoblast2	1.42424	111	Os09g0501200	Meristem	1.4024	61
OG0006060	AT3G59540	Atrichoblast2	1.42325	113	Os07g0546700	Meristem	1.23647	124
OG0006060	AT3G59540	Atrichoblast2	1.42325	113	Os11g0433900	Meristem	1.19722	142
OG0001806	AT1G52300	Atrichoblast2	1.4162	114	Os02g0111700	Meristem	1.22708	131
OG0001806	AT1G52300	Atrichoblast2	1.4162	114	Os08g0128500	Meristem	1.09108	177
OG0000627	AT5G28060	Atrichoblast2	1.41591	115	Os01g0723200	Meristem	1.62206	12
OG0000627	AT5G28060	Atrichoblast2	1.41591	115	Os06g0555400	Meristem	1.26034	115
OG0000627	AT5G28060	Atrichoblast2	1.41591	115	Os02g0229000	Meristem	1.17414	149
OG0002614	AT3G05590	Atrichoblast2	1.40866	117	Os05g0155100	Meristem	1.59781	15
OG0002614	AT3G05590	Atrichoblast2	1.40866	117	Os03g0341100	Meristem	1.1538	154
OG0000930	AT3G48930	Atrichoblast2	1.40532	118	Os07g0565100	Meristem	1.51242	27
OG0000930	AT3G48930	Atrichoblast2	1.40532	118	Os04g0613600	Meristem	1.41937	57
OG0000930	AT3G48930	Atrichoblast2	1.40532	118	Os07g0565000	Meristem	1.35914	78
OG0004358	AT1G30230	Atrichoblast2	1.39569	122	Os07g0614500	Meristem	1.38135	68
OG0002288	AT2G47110	Atrichoblast2	1.38083	125	Os05g0160200	Meristem	1.55877	21
OG0002288	AT2G47110	Atrichoblast2	1.38083	125	Os01g0328400	Meristem	1.41156	59
OG0001328	AT1G69620	Atrichoblast2	1.37778	126	Os08g0156800	Meristem	1.33976	85
OG0001328	AT1G69620	Atrichoblast2	1.37778	126	Os08g0436800	Meristem	1.08718	178
OG0004675	AT5G64140	Atrichoblast2	1.37747	127	Os10g0411700	Meristem	1.30629	96
OG0001717	AT1G02780	Atrichoblast2	1.37261	128	Os03g0337800	Meristem	1.45312	44
OG0001335	AT1G04270	Atrichoblast2	1.3657	129	Os03g0798600	Meristem	1.27469	109
OG0003540	AT3G06700	Atrichoblast2	1.34902	132	Os01g0304000	Meristem	1.05968	185
OG0001208	AT5G52650	Atrichoblast2	1.34639	133	Os01g0962600	Meristem	1.37005	73
OG0001208	AT5G52650	Atrichoblast2	1.34639	133	Os04g0430100	Meristem	1.28177	107
OG0002622	AT5G27770	Atrichoblast2	1.34489	134	Os07g0674200	Meristem	1.30139	98
OG0002622	AT5G27770	Atrichoblast2	1.34489	134	Os03g0343500	Meristem	1.09831	173
OG0001759	AT2G27530	Atrichoblast2	1.34262	135	Os02g0321900	Meristem	1.34815	82
OG0001759	AT2G27530	Atrichoblast2	1.34262	135	Os01g0860300	Meristem	1.02678	195
OG0000591	AT1G33140	Atrichoblast2	1.34152	136	Os09g0485900	Meristem	1.23946	123
OG0000591	AT1G33140	Atrichoblast2	1.34152	136	Os02g0103700	Meristem	1.13462	160
OG0004675	AT5G03850	Atrichoblast2	1.34095	137	Os10g0411700	Meristem	1.30629	96
OG0001328	AT3G28900	Atrichoblast2	1.34075	138	Os08g0156800	Meristem	1.33976	85
OG0001328	AT3G28900	Atrichoblast2	1.34075	138	Os08g0436800	Meristem	1.08718	178
OG0000056	AT5G59690	Atrichoblast2	1.32897	139	Os01g0835900	Meristem	1.10696	169
OG0001913	AT2G05220	Atrichoblast2	1.32744	142	Os10g0411800	Meristem	1.44383	47
OG0001913	AT2G05220	Atrichoblast2	1.32744	142	Os03g0109500	Meristem	1.27439	110
OG0009419	AT5G19510	Atrichoblast2	1.30797	144	Os07g0662500	Meristem	1.16088	153
OG0001445	AT3G53870	Atrichoblast2	1.30747	145	Os03g0577000	Meristem	1.42445	52
OG0001913	AT5G04800	Atrichoblast2	1.30233	146	Os10g0411800	Meristem	1.44383	47
OG0001913	AT5G04800	Atrichoblast2	1.30233	146	Os03g0109500	Meristem	1.27439	110
OG0001485	AT2G09990	Atrichoblast2	1.28835	149	Os11g0127900	Meristem	1.43786	48
OG0001485	AT2G09990	Atrichoblast2	1.28835	149	Os12g0124200	Meristem	1.31003	95
OG0001445	AT5G35530	Atrichoblast2	1.26648	155	Os03g0577000	Meristem	1.42445	52
OG0001342	AT1G34030	Atrichoblast2	1.25387	158	Os03g0794700	Meristem	1.34058	84
OG0001342	AT1G34030	Atrichoblast2	1.25387	158	Os07g0173501	Meristem	1.2636	114
OG0003432	AT5G62300	Atrichoblast2	1.23863	160	Os10g0170200	Meristem	1.285	106
OG0003432	AT5G62300	Atrichoblast2	1.23863	160	Os03g0249400	Meristem	1.22509	132
OG0001745	AT3G18740	Atrichoblast2	1.23482	161	Os05g0490100	Meristem	1.50526	31
OG0001745	AT3G18740	Atrichoblast2	1.23482	161	Os01g0276000	Meristem	1.36855	74
OG0000832	AT2G33370	Atrichoblast2	1.23292	162	Os03g0139100	Meristem	1.66476	6
OG0000832	AT2G33370	Atrichoblast2	1.23292	162	Os02g0814700	Meristem	1.42509	51
OG0000832	AT2G33370	Atrichoblast2	1.23292	162	Os10g0466700	Meristem	1.15217	155
OG0000746	AT3G58700	Atrichoblast2	1.22574	164	Os05g0207300	Meristem	1.37885	70
OG0000746	AT3G58700	Atrichoblast2	1.22574	164	Os01g0205500	Meristem	1.24667	120
OG0000174	AT5G60390	Atrichoblast2	1.22091	165	Os03g0177900	Meristem	1.05317	187
OG0001208	AT4G25740	Atrichoblast2	1.21894	166	Os01g0962600	Meristem	1.37005	73
OG0001208	AT4G25740	Atrichoblast2	1.21894	166	Os04g0430100	Meristem	1.28177	107
OG0004023	AT1G23290	Atrichoblast2	1.21741	167	Os03g0408300	Meristem	1.62725	11
OG0003432	AT3G47370	Atrichoblast2	1.21127	169	Os10g0170200	Meristem	1.285	106
OG0003432	AT3G47370	Atrichoblast2	1.21127	169	Os03g0249400	Meristem	1.22509	132
OG0001912	AT2G19750	Atrichoblast2	1.20097	170	Os06g0172600	Meristem	1.21496	135
OG0002485	AT2G17360	Atrichoblast2	1.1791	174	Os01g0358400	Meristem	1.37589	71
OG0002485	AT2G17360	Atrichoblast2	1.1791	174	Os02g0105900	Meristem	1.23214	128
OG0001531	AT5G02870	Atrichoblast2	1.17148	176	Os07g0180900	Meristem	1.42155	56
OG0001531	AT5G02870	Atrichoblast2	1.17148	176	Os03g0796501	Meristem	1.19861	141
OG0001445	AT2G31610	Atrichoblast2	1.16758	177	Os03g0577000	Meristem	1.42445	52
OG0001912	AT4G29390	Atrichoblast2	1.16725	178	Os06g0172600	Meristem	1.21496	135
OG0001342	AT4G09800	Atrichoblast2	1.15858	179	Os03g0794700	Meristem	1.34058	84
OG0001342	AT4G09800	Atrichoblast2	1.15858	179	Os07g0173501	Meristem	1.2636	114
OG0002481	AT2G40590	Atrichoblast2	1.1463	184	Os05g0477300	Meristem	1.3528	81
OG0002481	AT2G40590	Atrichoblast2	1.1463	184	Os01g0823300	Meristem	1.19337	144
OG0001792	AT1G07770	Atrichoblast2	1.14015	186	Os07g0208000	Meristem	1.45244	45
OG0001792	AT1G07770	Atrichoblast2	1.14015	186	Os02g0478600	Meristem	1.37101	72
OG0001290	AT1G57860	Atrichoblast2	1.13814	187	Os03g0141000	Meristem	1.47289	37
OG0003610	AT4G31700	Atrichoblast2	1.13795	188	Os07g0622100	Meristem	1.49676	33
OG0000905	AT3G53430	Atrichoblast2	1.13087	191	Os02g0699600	Meristem	1.42195	55
OG0000905	AT3G53430	Atrichoblast2	1.13087	191	Os04g0598200	Meristem	1.41274	58
OG0001792	AT3G46040	Atrichoblast2	1.10714	199	Os07g0208000	Meristem	1.45244	45
OG0001792	AT3G46040	Atrichoblast2	1.10714	199	Os02g0478600	Meristem	1.37101	72
OG0001993	AT5G22650	Atrichoblast2	1.10419	200	Os05g0597100	Meristem	1.7565	5
OG0009480	AT5G04080	Phloem	5.51506	1	Os01g0948600	Phloem	4.86982	3
OG0006651	AT4G33660	Phloem	2.77688	11	Os07g0191650	Phloem	4.19647	7
OG0009680	AT5G24800	Phloem	2.35611	17	Os02g0266800	Phloem	1.27475	79
OG0009680	AT5G24800	Phloem	2.35611	17	Os02g0175100	Phloem	1.13096	97
OG0000125	AT2G16740	Phloem	2.34923	18	Os04g0667800	Phloem	0.88662	166
OG0009529	AT5G54660	Phloem	2.10369	22	Os05g0500500	Phloem	0.957567	143
OG0001315	AT1G70670	Phloem	2.08832	23	Os06g0254700	Phloem	1.07996	110
OG0011401	AT2G18196	Phloem	2.02636	25	Os03g0120400	Phloem	0.904001	161
OG0005073	AT5G47920	Phloem	1.88646	32	Os04g0382400	Phloem	1.30902	74
OG0000886	AT3G55370	Phloem	1.43302	61	Os05g0112200	Phloem	1.13713	94
OG0001405	AT2G34140	Phloem	1.38955	66	Os01g0758200	Phloem	1.4635	58
OG0006935	AT5G59890	Phloem	1.295	83	Os05g0113400	Phloem	1.72116	40
OG0000287	AT3G53620	Phloem	1.22738	97	Os05g0438500	Phloem	2.95798	14
OG0001373	AT1G13440	Phloem	1.20365	100	Os08g0126300	Phloem	1.06434	114
OG0000071	AT5G09810	Phloem	1.19892	105	Os10g0510000	Phloem	2.14849	28
OG0000071	AT5G09810	Phloem	1.19892	105	Os11g0163100	Phloem	0.827143	186
OG0004288	AT1G71692	Phloem	1.17301	110	Os08g0112700	Phloem	1.49734	51
OG0000736	AT2G03090	Phloem	1.15032	116	Os05g0477600	Phloem	1.94971	33
OG0000736	AT2G03090	Phloem	1.15032	116	Os01g0823100	Phloem	0.808058	195
OG0010834	AT5G42980	Phloem	1.13066	117	Os05g0508500	Phloem	0.867864	173
OG0000710	AT1G69410	Phloem	1.12074	119	Os07g0597000	Phloem	1.53952	47
OG0001931	AT3G44220	Phloem	1.1032	126	Os12g0159600	Phloem	1.19296	88
OG0000372	AT5G06850	Phloem	1.08494	132	Os06g0614000	Phloem	1.09379	103
OG0001113	AT2G16600	Phloem	1.07618	136	Os10g0154700	Phloem	1.77229	39
OG0001113	AT2G16600	Phloem	1.07618	136	Os02g0121300	Phloem	1.058	118
OG0003384	AT2G31200	Phloem	1.05005	143	Os12g0628100	Phloem	1.63255	44
OG0012801	AT5G49320	Phloem	1.02133	150	Os01g0253400	Phloem	3.41457	10
OG0001890	AT2G36530	Phloem	1.01983	151	Os03g0248600	Phloem	1.01288	128
OG0003091	AT2G35635	Phloem	0.981806	161	Os09g0420800	Phloem	1.49022	53
OG0001113	AT4G38740	Phloem	0.960364	167	Os10g0154700	Phloem	1.77229	39
OG0001113	AT4G38740	Phloem	0.960364	167	Os02g0121300	Phloem	1.058	118
OG0001113	AT4G34870	Phloem	0.94359	173	Os10g0154700	Phloem	1.77229	39
OG0001113	AT4G34870	Phloem	0.94359	173	Os02g0121300	Phloem	1.058	118
OG0000125	AT4G27960	Phloem	0.933682	177	Os04g0667800	Phloem	0.88662	166
OG0008091	AT2G34690	Phloem	0.915642	180	Os03g0784900	Phloem	0.976288	140
OG0001973	AT3G57870	Phloem	0.905016	184	Os10g0536000	Phloem	0.803361	200
OG0000893	AT2G13820	Phloem	0.89602	188	Os07g0625800	Phloem	0.935978	150
OG0005673	AT1G78580	Phloem	0.887483	193	Os05g0518600	Phloem	2.10034	29
OG0000736	AT5G56320	Phloem	0.883706	195	Os05g0477600	Phloem	1.94971	33
OG0000736	AT5G56320	Phloem	0.883706	195	Os01g0823100	Phloem	0.808058	195
OG0001806	AT1G52300	Stele1	1.51424	19	Os02g0111700	Endodermis	1.5738	81
OG0001806	AT1G52300	Stele1	1.51424	19	Os08g0128500	Endodermis	1.28669	183
OG0003604	AT4G18100	Stele1	1.47188	24	Os09g0501200	Endodermis	1.42692	137
OG0001173	AT5G02960	Stele1	1.41076	26	Os03g0818400	Endodermis	1.82818	28
OG0001173	AT5G02960	Stele1	1.41076	26	Os01g0834500	Endodermis	1.77294	35
OG0002658	AT3G25520	Stele1	1.39415	29	Os01g0896700	Endodermis	1.70737	47
OG0002658	AT3G25520	Stele1	1.39415	29	Os01g0896800	Endodermis	1.42942	136
OG0002811	AT5G15200	Stele1	1.39011	30	Os03g0154700	Endodermis	1.77047	36
OG0002811	AT5G15200	Stele1	1.39011	30	Os11g0602600	Endodermis	1.52129	103
OG0001717	AT1G02780	Stele1	1.38628	31	Os03g0337800	Endodermis	1.42131	139
OG0000627	AT5G28060	Stele1	1.38036	33	Os01g0723200	Endodermis	1.63714	66
OG0000627	AT5G28060	Stele1	1.38036	33	Os02g0229000	Endodermis	1.39297	152
OG0000627	AT5G28060	Stele1	1.38036	33	Os06g0555400	Endodermis	1.3449	164
OG0001982	AT4G15000	Stele1	1.38015	34	Os10g0564300	Endodermis	1.88998	21
OG0001982	AT4G15000	Stele1	1.38015	34	Os02g0284600	Endodermis	1.51155	108
OG0002565	AT2G36160	Stele1	1.36236	38	Os02g0534800	Endodermis	1.60991	73
OG0002565	AT2G36160	Stele1	1.36236	38	Os02g0162500	Endodermis	1.56977	83
OG0002565	AT2G36160	Stele1	1.36236	38	Os04g0413600	Endodermis	1.31332	174
OG0001954	AT4G00100	Stele1	1.35333	41	Os08g0117300	Endodermis	1.71948	43
OG0004023	AT1G70600	Stele1	1.33197	42	Os03g0408300	Endodermis	1.92565	16
OG0000832	AT3G04400	Stele1	1.32991	44	Os03g0139100	Endodermis	1.62716	70
OG0000832	AT3G04400	Stele1	1.32991	44	Os10g0466700	Endodermis	1.50721	112
OG0000832	AT3G04400	Stele1	1.32991	44	Os02g0814700	Endodermis	1.46297	126
OG0003344	AT4G39200	Stele1	1.32192	46	Os08g0559200	Endodermis	1.58884	77
OG0002612	AT3G24830	Stele1	1.31533	48	Os03g0756000	Endodermis	1.55754	91
OG0002612	AT3G24830	Stele1	1.31533	48	Os07g0109500	Endodermis	1.41856	140
OG0001792	AT1G07770	Stele1	1.31028	49	Os07g0208000	Endodermis	1.91131	19
OG0001792	AT1G07770	Stele1	1.31028	49	Os02g0478600	Endodermis	1.66326	58
OG0000930	AT3G48930	Stele1	1.30766	50	Os04g0613600	Endodermis	1.81282	30
OG0000930	AT3G48930	Stele1	1.30766	50	Os07g0565100	Endodermis	1.79417	31
OG0000930	AT3G48930	Stele1	1.30766	50	Os07g0565000	Endodermis	1.56709	86
OG0000746	AT4G18730	Stele1	1.28636	53	Os05g0207300	Endodermis	1.51452	106
OG0000746	AT4G18730	Stele1	1.28636	53	Os02g0235600	Endodermis	1.22512	198
OG0000746	AT4G18730	Stele1	1.28636	53	Os01g0205500	Endodermis	1.22252	200
OG0001485	AT5G18380	Stele1	1.28265	54	Os12g0124200	Endodermis	1.75744	38
OG0001485	AT5G18380	Stele1	1.28265	54	Os11g0127900	Endodermis	1.68089	52
OG0003292	AT3G11940	Stele1	1.27777	55	Os01g0100700	Endodermis	1.84955	26
OG0003292	AT3G11940	Stele1	1.27777	55	Os11g0482000	Endodermis	1.43376	134
OG0001732	AT2G34480	Stele1	1.27759	56	Os05g0565000	Endodermis	1.53039	102
OG0001732	AT2G34480	Stele1	1.27759	56	Os01g0752300	Endodermis	1.43742	133
OG0002631	AT3G49910	Stele1	1.27425	57	Os12g0150100	Endodermis	1.5793	80
OG0002631	AT3G49910	Stele1	1.27425	57	Os11g0151300	Endodermis	1.36889	158
OG0001567	AT4G17390	Stele1	1.27322	58	Os03g0598800	Endodermis	1.75334	40
OG0001061	AT1G43170	Stele1	1.26809	59	Os11g0168200	Endodermis	1.49933	115
OG0001061	AT1G43170	Stele1	1.26809	59	Os12g0167900	Endodermis	1.40252	148
OG0002565	AT3G11510	Stele1	1.26545	60	Os02g0534800	Endodermis	1.60991	73
OG0002565	AT3G11510	Stele1	1.26545	60	Os02g0162500	Endodermis	1.56977	83
OG0002565	AT3G11510	Stele1	1.26545	60	Os04g0413600	Endodermis	1.31332	174
OG0006226	AT3G61110	Stele1	1.24869	66	Os02g0478700	Endodermis	1.71033	45
OG0002614	AT5G27850	Stele1	1.22668	72	Os05g0155100	Endodermis	1.71161	44
OG0002614	AT5G27850	Stele1	1.22668	72	Os03g0341100	Endodermis	1.38379	155
OG0002550	AT4G27090	Stele1	1.21899	75	Os02g0622300	Endodermis	1.66267	59
OG0002550	AT4G27090	Stele1	1.21899	75	Os04g0515300	Endodermis	1.56735	85
OG0001342	AT4G09800	Stele1	1.2178	76	Os03g0794700	Endodermis	1.74853	41
OG0001342	AT4G09800	Stele1	1.2178	76	Os07g0173501	Endodermis	1.30791	176
OG0001759	AT2G27530	Stele1	1.2143	77	Os02g0321900	Endodermis	1.54471	97
OG0001759	AT2G27530	Stele1	1.2143	77	Os01g0860300	Endodermis	1.3204	170
OG0001208	AT5G41520	Stele1	1.21179	78	Os01g0962600	Endodermis	1.56518	89
OG0001208	AT5G41520	Stele1	1.21179	78	Os04g0430100	Endodermis	1.40563	146
OG0006060	AT3G59540	Stele1	1.21086	79	Os07g0546700	Endodermis	1.76947	37
OG0006060	AT3G59540	Stele1	1.21086	79	Os11g0433900	Endodermis	1.60247	75
OG0001745	AT1G77940	Stele1	1.20854	82	Os01g0276000	Endodermis	1.7773	34
OG0001745	AT1G77940	Stele1	1.20854	82	Os05g0490100	Endodermis	1.63051	69
OG0002643	AT3G49010	Stele1	1.20431	84	Os03g0576700	Endodermis	1.62284	71
OG0002643	AT3G49010	Stele1	1.20431	84	Os06g0115500	Endodermis	1.41166	145
OG0002462	AT5G02450	Stele1	1.19975	86	Os05g0459900	Endodermis	1.49481	117
OG0001454	AT2G47610	Stele1	1.19842	89	Os08g0326400	Endodermis	1.66061	61
OG0001454	AT2G47610	Stele1	1.19842	89	Os09g0507800	Endodermis	1.57293	82
OG0002288	AT2G47110	Stele1	1.19433	90	Os05g0160200	Endodermis	1.7398	42
OG0002288	AT2G47110	Stele1	1.19433	90	Os01g0328400	Endodermis	1.53275	101
OG0004105	AT1G67430	Stele1	1.19363	91	Os09g0258600	Endodermis	1.91846	17
OG0000377	AT2G27710	Stele1	1.1909	93	Os01g0191100	Endodermis	1.4307	135
OG0000377	AT2G27710	Stele1	1.1909	93	Os05g0445500	Endodermis	1.31591	173
OG0003610	AT4G31700	Stele1	1.17117	94	Os07g0622100	Endodermis	1.63704	67
OG0002658	AT5G39740	Stele1	1.16101	98	Os01g0896700	Endodermis	1.70737	47
OG0002658	AT5G39740	Stele1	1.16101	98	Os01g0896800	Endodermis	1.42942	136
OG0002462	AT3G53740	Stele1	1.16036	99	Os05g0459900	Endodermis	1.49481	117
OG0006060	AT2G43460	Stele1	1.14862	102	Os07g0546700	Endodermis	1.76947	37
OG0006060	AT2G43460	Stele1	1.14862	102	Os11g0433900	Endodermis	1.60247	75
OG0001378	AT1G72370	Stele1	1.14799	103	Os03g0182600	Endodermis	1.55108	92
OG0001127	AT3G09200	Stele1	1.14239	105	Os08g0130500	Endodermis	1.37387	157
OG0002679	AT3G02080	Stele1	1.14114	106	Os03g0424800	Endodermis	1.86359	23
OG0002679	AT3G02080	Stele1	1.14114	106	Os03g0424500	Endodermis	1.61567	72
OG0001454	AT3G62870	Stele1	1.13218	107	Os08g0326400	Endodermis	1.66061	61
OG0001454	AT3G62870	Stele1	1.13218	107	Os09g0507800	Endodermis	1.57293	82
OG0002614	AT3G05590	Stele1	1.12798	108	Os05g0155100	Endodermis	1.71161	44
OG0002614	AT3G05590	Stele1	1.12798	108	Os03g0341100	Endodermis	1.38379	155
OG0002485	AT5G07090	Stele1	1.1242	110	Os01g0358400	Endodermis	1.83417	27
OG0002485	AT5G07090	Stele1	1.1242	110	Os02g0105900	Endodermis	1.33342	166
OG0001567	AT4G16720	Stele1	1.12368	111	Os03g0598800	Endodermis	1.75334	40
OG0003358	AT3G53020	Stele1	1.11996	112	Os01g0815800	Endodermis	1.49776	116
OG0003358	AT3G53020	Stele1	1.11996	112	Os05g0486700	Endodermis	1.48577	121
OG0003476	AT3G60245	Stele1	1.11965	113	Os01g0679700	Endodermis	1.53859	99
OG0003476	AT3G60245	Stele1	1.11965	113	Os05g0557000	Endodermis	1.39876	151
OG0001445	AT3G53870	Stele1	1.1107	114	Os03g0577000	Endodermis	1.44243	131
OG0001913	AT2G05220	Stele1	1.10858	115	Os03g0109500	Endodermis	1.75517	39
OG0001913	AT2G05220	Stele1	1.10858	115	Os10g0411800	Endodermis	1.56945	84
OG0000627	AT3G04920	Stele1	1.10753	116	Os01g0723200	Endodermis	1.63714	66
OG0000627	AT3G04920	Stele1	1.10753	116	Os02g0229000	Endodermis	1.39297	152
OG0000627	AT3G04920	Stele1	1.10753	116	Os06g0555400	Endodermis	1.3449	164
OG0002481	AT3G56340	Stele1	1.1031	117	Os05g0477300	Endodermis	1.5016	114
OG0002481	AT3G56340	Stele1	1.1031	117	Os01g0823300	Endodermis	1.36816	159
OG0001531	AT5G02870	Stele1	1.09871	119	Os07g0180900	Endodermis	1.50988	110
OG0001531	AT5G02870	Stele1	1.09871	119	Os03g0796501	Endodermis	1.4437	130
OG0001328	AT1G69620	Stele1	1.0975	120	Os08g0156800	Endodermis	1.56597	87
OG0001328	AT1G69620	Stele1	1.0975	120	Os08g0436800	Endodermis	1.41745	142
OG0002539	AT3G09500	Stele1	1.0898	124	Os04g0376000	Endodermis	1.41347	143
OG0002622	AT5G27770	Stele1	1.08756	125	Os07g0674200	Endodermis	1.51329	107
OG0002622	AT5G27770	Stele1	1.08756	125	Os03g0343500	Endodermis	1.25632	189
OG0002512	AT2G18020	Stele1	1.08742	126	Os12g0567700	Endodermis	1.90062	20
OG0006621	AT4G09320	Stele1	1.08344	128	Os10g0563700	Endodermis	1.70703	48
OG0000377	AT2G27720	Stele1	1.06719	132	Os01g0191100	Endodermis	1.4307	135
OG0000377	AT2G27720	Stele1	1.06719	132	Os05g0445500	Endodermis	1.31591	173
OG0001374	AT1G18540	Stele1	1.06569	133	Os04g0473400	Endodermis	1.54715	96
OG0001374	AT1G18540	Stele1	1.06569	133	Os02g0591700	Endodermis	1.26645	187
OG0001290	AT1G57660	Stele1	1.06562	134	Os03g0141000	Endodermis	1.50955	111
OG0000932	AT3G04840	Stele1	1.06559	135	Os03g0200500	Endodermis	1.58805	78
OG0000932	AT3G04840	Stele1	1.06559	135	Os02g0287000	Endodermis	1.47398	123
OG0000932	AT3G04840	Stele1	1.06559	135	Os12g0406200	Endodermis	1.35057	163
OG0001185	AT3G23390	Stele1	1.05092	143	Os07g0523700	Endodermis	1.68394	51
OG0001185	AT3G23390	Stele1	1.05092	143	Os07g0450000	Endodermis	1.22424	199
OG0003344	AT2G21580	Stele1	1.04952	145	Os08g0559200	Endodermis	1.58884	77
OG0004023	AT1G23290	Stele1	1.04764	147	Os03g0408300	Endodermis	1.92565	16
OG0004358	AT1G30230	Stele1	1.03247	149	Os07g0614500	Endodermis	1.71027	46
OG0001158	AT3G53890	Stele1	1.0287	151	Os03g0345200	Endodermis	1.51009	109
OG0000924	AT2G01250	Stele1	1.02662	152	Os08g0234000	Endodermis	1.60479	74
OG0000924	AT2G01250	Stele1	1.02662	152	Os04g0605900	Endodermis	1.51533	105
OG0000832	AT2G33370	Stele1	1.02282	157	Os03g0139100	Endodermis	1.62716	70
OG0000832	AT2G33370	Stele1	1.02282	157	Os10g0466700	Endodermis	1.50721	112
OG0000832	AT2G33370	Stele1	1.02282	157	Os02g0814700	Endodermis	1.46297	126
OG0002288	AT3G62250	Stele1	1.01919	158	Os05g0160200	Endodermis	1.7398	42
OG0002288	AT3G62250	Stele1	1.01919	158	Os01g0328400	Endodermis	1.53275	101
OG0009419	AT5G19510	Stele1	1.0139	159	Os07g0662500	Endodermis	1.40296	147
OG0001956	AT4G33865	Stele1	1.01197	160	Os11g0634500	Endodermis	1.45707	127
OG0001956	AT4G33865	Stele1	1.01197	160	Os12g0508300	Endodermis	1.45689	128
OG0001335	AT1G04270	Stele1	1.00812	162	Os03g0798600	Endodermis	1.36046	161
OG0001342	AT1G22780	Stele1	1.00531	163	Os03g0794700	Endodermis	1.74853	41
OG0001342	AT1G22780	Stele1	1.00531	163	Os07g0173501	Endodermis	1.30791	176
OG0001863	AT2G39460	Stele1	1.00425	165	Os01g0348700	Endodermis	1.48305	122
OG0001863	AT2G39460	Stele1	1.00425	165	Os04g0501000	Endodermis	1.24731	191
OG0001342	AT1G34030	Stele1	1.00414	166	Os03g0794700	Endodermis	1.74853	41
OG0001342	AT1G34030	Stele1	1.00414	166	Os07g0173501	Endodermis	1.30791	176
OG0000591	AT1G33140	Stele1	1.00245	167	Os09g0485900	Endodermis	1.38602	154
OG0001954	AT3G60770	Stele1	0.997574	169	Os08g0117300	Endodermis	1.71948	43
OG0000905	AT2G37190	Stele1	0.988572	171	Os04g0598200	Endodermis	1.67177	54
OG0000905	AT2G37190	Stele1	0.988572	171	Os02g0699600	Endodermis	1.49045	119
OG0001045	AT2G41840	Stele1	0.985958	173	Os03g0807800	Endodermis	1.5487	95
OG0000591	AT1G33120	Stele1	0.977732	175	Os09g0485900	Endodermis	1.38602	154
OG0002622	AT3G05560	Stele1	0.971547	177	Os07g0674200	Endodermis	1.51329	107
OG0002622	AT3G05560	Stele1	0.971547	177	Os03g0343500	Endodermis	1.25632	189
OG0000905	AT3G53430	Stele1	0.968434	179	Os04g0598200	Endodermis	1.67177	54
OG0000905	AT3G53430	Stele1	0.968434	179	Os02g0699600	Endodermis	1.49045	119
OG0002679	AT5G61170	Stele1	0.96358	182	Os03g0424800	Endodermis	1.86359	23
OG0002679	AT5G61170	Stele1	0.96358	182	Os03g0424500	Endodermis	1.61567	72
OG0001993	AT5G22650	Stele1	0.961238	183	Os05g0597100	Endodermis	1.65502	63
OG0001017	AT3G55750	Stele1	0.956241	185	Os02g0785800	Endodermis	1.42155	138
OG0001017	AT3G55750	Stele1	0.956241	185	Os05g0556900	Endodermis	1.40026	149
OG0000932	AT4G34670	Stele1	0.954371	189	Os03g0200500	Endodermis	1.58805	78
OG0000932	AT4G34670	Stele1	0.954371	189	Os02g0287000	Endodermis	1.47398	123
OG0000932	AT4G34670	Stele1	0.954371	189	Os12g0406200	Endodermis	1.35057	163
OG0000930	AT5G23740	Stele1	0.947945	190	Os04g0613600	Endodermis	1.81282	30
OG0000930	AT5G23740	Stele1	0.947945	190	Os07g0565100	Endodermis	1.79417	31
OG0000930	AT5G23740	Stele1	0.947945	190	Os07g0565000	Endodermis	1.56709	86
OG0001745	AT3G18740	Stele1	0.94281	193	Os01g0276000	Endodermis	1.7773	34
OG0001745	AT3G18740	Stele1	0.94281	193	Os05g0490100	Endodermis	1.63051	69
OG0002485	AT2G17360	Stele1	0.93961	194	Os01g0358400	Endodermis	1.83417	27
OG0002485	AT2G17360	Stele1	0.93961	194	Os02g0105900	Endodermis	1.33342	166
OG0001732	AT3G14600	Stele1	0.933212	199	Os05g0565000	Endodermis	1.53039	102
OG0001732	AT3G14600	Stele1	0.933212	199	Os01g0752300	Endodermis	1.43742	133
OG0001806	AT1G52300	Stele1	1.51424	19	Os02g0111700	Meristem	1.22708	131
OG0001806	AT1G52300	Stele1	1.51424	19	Os08g0128500	Meristem	1.09108	177
OG0003604	AT4G18100	Stele1	1.47188	24	Os09g0501200	Meristem	1.4024	61
OG0001173	AT5G02960	Stele1	1.41076	26	Os01g0834500	Meristem	1.48483	36
OG0001173	AT5G02960	Stele1	1.41076	26	Os03g0818400	Meristem	1.42407	53
OG0002658	AT3G25520	Stele1	1.39415	29	Os01g0896700	Meristem	1.45854	42
OG0002658	AT3G25520	Stele1	1.39415	29	Os01g0896800	Meristem	1.18678	146
OG0002811	AT5G15200	Stele1	1.39011	30	Os03g0154700	Meristem	1.51123	30
OG0002811	AT5G15200	Stele1	1.39011	30	Os11g0602600	Meristem	1.36539	75
OG0001717	AT1G02780	Stele1	1.38628	31	Os03g0337800	Meristem	1.45312	44
OG0000627	AT5G28060	Stele1	1.38036	33	Os01g0723200	Meristem	1.62206	12
OG0000627	AT5G28060	Stele1	1.38036	33	Os06g0555400	Meristem	1.26034	115
OG0000627	AT5G28060	Stele1	1.38036	33	Os02g0229000	Meristem	1.17414	149
OG0001982	AT4G15000	Stele1	1.38015	34	Os10g0564300	Meristem	1.58167	20
OG0001982	AT4G15000	Stele1	1.38015	34	Os02g0284600	Meristem	1.35899	79
OG0002565	AT2G36160	Stele1	1.36236	38	Os02g0534800	Meristem	1.38879	65
OG0002565	AT2G36160	Stele1	1.36236	38	Os04g0413600	Meristem	1.26429	113
OG0002565	AT2G36160	Stele1	1.36236	38	Os02g0162500	Meristem	1.20734	138
OG0001954	AT4G00100	Stele1	1.35333	41	Os08g0117300	Meristem	1.59571	17
OG0004023	AT1G70600	Stele1	1.33197	42	Os03g0408300	Meristem	1.62725	11
OG0000832	AT3G04400	Stele1	1.32991	44	Os03g0139100	Meristem	1.66476	6
OG0000832	AT3G04400	Stele1	1.32991	44	Os02g0814700	Meristem	1.42509	51
OG0000832	AT3G04400	Stele1	1.32991	44	Os10g0466700	Meristem	1.15217	155
OG0003344	AT4G39200	Stele1	1.32192	46	Os08g0559200	Meristem	1.40715	60
OG0002612	AT3G24830	Stele1	1.31533	48	Os03g0756000	Meristem	1.46814	40
OG0002612	AT3G24830	Stele1	1.31533	48	Os07g0109500	Meristem	1.16942	151
OG0001792	AT1G07770	Stele1	1.31028	49	Os07g0208000	Meristem	1.45244	45
OG0001792	AT1G07770	Stele1	1.31028	49	Os02g0478600	Meristem	1.37101	72
OG0000930	AT3G48930	Stele1	1.30766	50	Os07g0565100	Meristem	1.51242	27
OG0000930	AT3G48930	Stele1	1.30766	50	Os04g0613600	Meristem	1.41937	57
OG0000930	AT3G48930	Stele1	1.30766	50	Os07g0565000	Meristem	1.35914	78
OG0000746	AT4G18730	Stele1	1.28636	53	Os05g0207300	Meristem	1.37885	70
OG0000746	AT4G18730	Stele1	1.28636	53	Os01g0205500	Meristem	1.24667	120
OG0001485	AT5G18380	Stele1	1.28265	54	Os11g0127900	Meristem	1.43786	48
OG0001485	AT5G18380	Stele1	1.28265	54	Os12g0124200	Meristem	1.31003	95
OG0003292	AT3G11940	Stele1	1.27777	55	Os01g0100700	Meristem	1.4998	32
OG0003292	AT3G11940	Stele1	1.27777	55	Os11g0482000	Meristem	1.22799	130
OG0001732	AT2G34480	Stele1	1.27759	56	Os01g0752300	Meristem	1.27305	111
OG0001732	AT2G34480	Stele1	1.27759	56	Os05g0565000	Meristem	1.05241	188
OG0002631	AT3G49910	Stele1	1.27425	57	Os11g0151300	Meristem	1.22505	133
OG0002631	AT3G49910	Stele1	1.27425	57	Os12g0150100	Meristem	1.11745	166
OG0001567	AT4G17390	Stele1	1.27322	58	Os03g0598800	Meristem	1.61668	14
OG0001061	AT1G43170	Stele1	1.26809	59	Os11g0168200	Meristem	1.42853	50
OG0001061	AT1G43170	Stele1	1.26809	59	Os12g0167900	Meristem	1.39743	62
OG0002565	AT3G11510	Stele1	1.26545	60	Os02g0534800	Meristem	1.38879	65
OG0002565	AT3G11510	Stele1	1.26545	60	Os04g0413600	Meristem	1.26429	113
OG0002565	AT3G11510	Stele1	1.26545	60	Os02g0162500	Meristem	1.20734	138
OG0006226	AT3G61110	Stele1	1.24869	66	Os02g0478700	Meristem	1.59572	16
OG0002614	AT5G27850	Stele1	1.22668	72	Os05g0155100	Meristem	1.59781	15
OG0002614	AT5G27850	Stele1	1.22668	72	Os03g0341100	Meristem	1.1538	154
OG0002550	AT4G27090	Stele1	1.21899	75	Os02g0622300	Meristem	1.52604	24
OG0002550	AT4G27090	Stele1	1.21899	75	Os04g0515300	Meristem	1.11683	167
OG0001342	AT4G09800	Stele1	1.2178	76	Os03g0794700	Meristem	1.34058	84
OG0001342	AT4G09800	Stele1	1.2178	76	Os07g0173501	Meristem	1.2636	114
OG0001759	AT2G27530	Stele1	1.2143	77	Os02g0321900	Meristem	1.34815	82
OG0001759	AT2G27530	Stele1	1.2143	77	Os01g0860300	Meristem	1.02678	195
OG0001208	AT5G41520	Stele1	1.21179	78	Os01g0962600	Meristem	1.37005	73
OG0001208	AT5G41520	Stele1	1.21179	78	Os04g0430100	Meristem	1.28177	107
OG0006060	AT3G59540	Stele1	1.21086	79	Os07g0546700	Meristem	1.23647	124
OG0006060	AT3G59540	Stele1	1.21086	79	Os11g0433900	Meristem	1.19722	142
OG0001745	AT1G77940	Stele1	1.20854	82	Os05g0490100	Meristem	1.50526	31
OG0001745	AT1G77940	Stele1	1.20854	82	Os01g0276000	Meristem	1.36855	74
OG0002643	AT3G49010	Stele1	1.20431	84	Os03g0576700	Meristem	1.3794	69
OG0002643	AT3G49010	Stele1	1.20431	84	Os06g0115500	Meristem	1.2924	102
OG0002462	AT5G02450	Stele1	1.19975	86	Os05g0459900	Meristem	1.12535	164
OG0001454	AT2G47610	Stele1	1.19842	89	Os08g0326400	Meristem	1.47218	38
OG0001454	AT2G47610	Stele1	1.19842	89	Os09g0507800	Meristem	1.47025	39
OG0002288	AT2G47110	Stele1	1.19433	90	Os05g0160200	Meristem	1.55877	21
OG0002288	AT2G47110	Stele1	1.19433	90	Os01g0328400	Meristem	1.41156	59
OG0004105	AT1G67430	Stele1	1.19363	91	Os09g0258600	Meristem	1.51969	25
OG0000377	AT2G27710	Stele1	1.1909	93	Os01g0191100	Meristem	1.5116	29
OG0000377	AT2G27710	Stele1	1.1909	93	Os05g0445500	Meristem	1.07664	181
OG0000377	AT2G27710	Stele1	1.1909	93	Os02g0529700	Meristem	1.01758	199
OG0003610	AT4G31700	Stele1	1.17117	94	Os07g0622100	Meristem	1.49676	33
OG0002658	AT5G39740	Stele1	1.16101	98	Os01g0896700	Meristem	1.45854	42
OG0002658	AT5G39740	Stele1	1.16101	98	Os01g0896800	Meristem	1.18678	146
OG0002462	AT3G53740	Stele1	1.16036	99	Os05g0459900	Meristem	1.12535	164
OG0006060	AT2G43460	Stele1	1.14862	102	Os07g0546700	Meristem	1.23647	124
OG0006060	AT2G43460	Stele1	1.14862	102	Os11g0433900	Meristem	1.19722	142
OG0001378	AT1G72370	Stele1	1.14799	103	Os03g0182600	Meristem	1.29121	103
OG0001378	AT1G72370	Stele1	1.14799	103	Os07g0616600	Meristem	1.14737	159
OG0001127	AT3G09200	Stele1	1.14239	105	Os08g0130500	Meristem	1.32803	86
OG0002679	AT3G02080	Stele1	1.14114	106	Os03g0424800	Meristem	1.63578	9
OG0002679	AT3G02080	Stele1	1.14114	106	Os03g0424500	Meristem	1.59061	18
OG0001454	AT3G62870	Stele1	1.13218	107	Os08g0326400	Meristem	1.47218	38
OG0001454	AT3G62870	Stele1	1.13218	107	Os09g0507800	Meristem	1.47025	39
OG0002614	AT3G05590	Stele1	1.12798	108	Os05g0155100	Meristem	1.59781	15
OG0002614	AT3G05590	Stele1	1.12798	108	Os03g0341100	Meristem	1.1538	154
OG0002485	AT5G07090	Stele1	1.1242	110	Os01g0358400	Meristem	1.37589	71
OG0002485	AT5G07090	Stele1	1.1242	110	Os02g0105900	Meristem	1.23214	128
OG0001567	AT4G16720	Stele1	1.12368	111	Os03g0598800	Meristem	1.61668	14
OG0003358	AT3G53020	Stele1	1.11996	112	Os01g0815800	Meristem	1.3117	94
OG0003476	AT3G60245	Stele1	1.11965	113	Os05g0557000	Meristem	1.28932	104
OG0003476	AT3G60245	Stele1	1.11965	113	Os01g0679700	Meristem	1.18559	148
OG0001445	AT3G53870	Stele1	1.1107	114	Os03g0577000	Meristem	1.42445	52
OG0001913	AT2G05220	Stele1	1.10858	115	Os10g0411800	Meristem	1.44383	47
OG0001913	AT2G05220	Stele1	1.10858	115	Os03g0109500	Meristem	1.27439	110
OG0000627	AT3G04920	Stele1	1.10753	116	Os01g0723200	Meristem	1.62206	12
OG0000627	AT3G04920	Stele1	1.10753	116	Os06g0555400	Meristem	1.26034	115
OG0000627	AT3G04920	Stele1	1.10753	116	Os02g0229000	Meristem	1.17414	149
OG0002481	AT3G56340	Stele1	1.1031	117	Os05g0477300	Meristem	1.3528	81
OG0002481	AT3G56340	Stele1	1.1031	117	Os01g0823300	Meristem	1.19337	144
OG0001531	AT5G02870	Stele1	1.09871	119	Os07g0180900	Meristem	1.42155	56
OG0001531	AT5G02870	Stele1	1.09871	119	Os03g0796501	Meristem	1.19861	141
OG0001328	AT1G69620	Stele1	1.0975	120	Os08g0156800	Meristem	1.33976	85
OG0001328	AT1G69620	Stele1	1.0975	120	Os08g0436800	Meristem	1.08718	178
OG0002539	AT3G09500	Stele1	1.0898	124	Os04g0376000	Meristem	1.24765	119
OG0002622	AT5G27770	Stele1	1.08756	125	Os07g0674200	Meristem	1.30139	98
OG0002622	AT5G27770	Stele1	1.08756	125	Os03g0343500	Meristem	1.09831	173
OG0002512	AT2G18020	Stele1	1.08742	126	Os12g0567700	Meristem	1.54647	23
OG0006621	AT4G09320	Stele1	1.08344	128	Os10g0563700	Meristem	1.36444	76
OG0000893	AT2G13820	Stele1	1.07844	130	Os03g0192600	Meristem	1.62068	13
OG0000377	AT2G27720	Stele1	1.06719	132	Os01g0191100	Meristem	1.5116	29
OG0000377	AT2G27720	Stele1	1.06719	132	Os05g0445500	Meristem	1.07664	181
OG0000377	AT2G27720	Stele1	1.06719	132	Os02g0529700	Meristem	1.01758	199
OG0001374	AT1G18540	Stele1	1.06569	133	Os04g0473400	Meristem	1.38203	67
OG0001374	AT1G18540	Stele1	1.06569	133	Os02g0591700	Meristem	1.25026	117
OG0001290	AT1G57660	Stele1	1.06562	134	Os03g0141000	Meristem	1.47289	37
OG0000932	AT3G04840	Stele1	1.06559	135	Os03g0200500	Meristem	1.45908	41
OG0000932	AT3G04840	Stele1	1.06559	135	Os12g0406200	Meristem	1.20093	140
OG0000932	AT3G04840	Stele1	1.06559	135	Os02g0287000	Meristem	1.14977	156
OG0001185	AT3G23390	Stele1	1.05092	143	Os07g0523700	Meristem	1.38336	66
OG0001185	AT3G23390	Stele1	1.05092	143	Os07g0450000	Meristem	1.07921	180
OG0003344	AT2G21580	Stele1	1.04952	145	Os08g0559200	Meristem	1.40715	60
OG0004023	AT1G23290	Stele1	1.04764	147	Os03g0408300	Meristem	1.62725	11
OG0000174	AT5G60390	Stele1	1.03747	148	Os03g0177900	Meristem	1.05317	187
OG0004358	AT1G30230	Stele1	1.03247	149	Os07g0614500	Meristem	1.38135	68
OG0000924	AT2G01250	Stele1	1.02662	152	Os08g0234000	Meristem	1.45319	43
OG0000924	AT2G01250	Stele1	1.02662	152	Os04g0605900	Meristem	1.25145	116
OG0000832	AT2G33370	Stele1	1.02282	157	Os03g0139100	Meristem	1.66476	6
OG0000832	AT2G33370	Stele1	1.02282	157	Os02g0814700	Meristem	1.42509	51
OG0000832	AT2G33370	Stele1	1.02282	157	Os10g0466700	Meristem	1.15217	155
OG0002288	AT3G62250	Stele1	1.01919	158	Os05g0160200	Meristem	1.55877	21
OG0002288	AT3G62250	Stele1	1.01919	158	Os01g0328400	Meristem	1.41156	59
OG0009419	AT5G19510	Stele1	1.0139	159	Os07g0662500	Meristem	1.16088	153
OG0001956	AT4G33865	Stele1	1.01197	160	Os12g0508300	Meristem	1.22984	129
OG0001956	AT4G33865	Stele1	1.01197	160	Os11g0634500	Meristem	1.17021	150
OG0001335	AT1G04270	Stele1	1.00812	162	Os03g0798600	Meristem	1.27469	109
OG0001342	AT1G22780	Stele1	1.00531	163	Os03g0794700	Meristem	1.34058	84
OG0001342	AT1G22780	Stele1	1.00531	163	Os07g0173501	Meristem	1.2636	114
OG0001863	AT2G39460	Stele1	1.00425	165	Os01g0348700	Meristem	1.31423	92
OG0001863	AT2G39460	Stele1	1.00425	165	Os04g0501000	Meristem	1.24931	118
OG0001342	AT1G34030	Stele1	1.00414	166	Os03g0794700	Meristem	1.34058	84
OG0001342	AT1G34030	Stele1	1.00414	166	Os07g0173501	Meristem	1.2636	114
OG0000591	AT1G33140	Stele1	1.00245	167	Os09g0485900	Meristem	1.23946	123
OG0000591	AT1G33140	Stele1	1.00245	167	Os02g0103700	Meristem	1.13462	160
OG0001954	AT3G60770	Stele1	0.997574	169	Os08g0117300	Meristem	1.59571	17
OG0000905	AT2G37190	Stele1	0.988572	171	Os02g0699600	Meristem	1.42195	55
OG0000905	AT2G37190	Stele1	0.988572	171	Os04g0598200	Meristem	1.41274	58
OG0001045	AT2G41840	Stele1	0.985958	173	Os03g0807800	Meristem	1.44867	46
OG0003540	AT3G06700	Stele1	0.978131	174	Os01g0304000	Meristem	1.05968	185
OG0000591	AT1G33120	Stele1	0.977732	175	Os09g0485900	Meristem	1.23946	123
OG0000591	AT1G33120	Stele1	0.977732	175	Os02g0103700	Meristem	1.13462	160
OG0002622	AT3G05560	Stele1	0.971547	177	Os07g0674200	Meristem	1.30139	98
OG0002622	AT3G05560	Stele1	0.971547	177	Os03g0343500	Meristem	1.09831	173
OG0000905	AT3G53430	Stele1	0.968434	179	Os02g0699600	Meristem	1.42195	55
OG0000905	AT3G53430	Stele1	0.968434	179	Os04g0598200	Meristem	1.41274	58
OG0002679	AT5G61170	Stele1	0.96358	182	Os03g0424800	Meristem	1.63578	9
OG0002679	AT5G61170	Stele1	0.96358	182	Os03g0424500	Meristem	1.59061	18
OG0001993	AT5G22650	Stele1	0.961238	183	Os05g0597100	Meristem	1.7565	5
OG0001017	AT3G55750	Stele1	0.956241	185	Os05g0556900	Meristem	1.39569	63
OG0001017	AT3G55750	Stele1	0.956241	185	Os02g0785800	Meristem	1.04968	189
OG0000932	AT4G34670	Stele1	0.954371	189	Os03g0200500	Meristem	1.45908	41
OG0000932	AT4G34670	Stele1	0.954371	189	Os12g0406200	Meristem	1.20093	140
OG0000932	AT4G34670	Stele1	0.954371	189	Os02g0287000	Meristem	1.14977	156
OG0000930	AT5G23740	Stele1	0.947945	190	Os07g0565100	Meristem	1.51242	27
OG0000930	AT5G23740	Stele1	0.947945	190	Os04g0613600	Meristem	1.41937	57
OG0000930	AT5G23740	Stele1	0.947945	190	Os07g0565000	Meristem	1.35914	78
OG0001745	AT3G18740	Stele1	0.94281	193	Os05g0490100	Meristem	1.50526	31
OG0001745	AT3G18740	Stele1	0.94281	193	Os01g0276000	Meristem	1.36855	74
OG0002485	AT2G17360	Stele1	0.93961	194	Os01g0358400	Meristem	1.37589	71
OG0002485	AT2G17360	Stele1	0.93961	194	Os02g0105900	Meristem	1.23214	128
OG0001732	AT3G14600	Stele1	0.933212	199	Os01g0752300	Meristem	1.27305	111
OG0001732	AT3G14600	Stele1	0.933212	199	Os05g0565000	Meristem	1.05241	188
OG0000292	AT2G37170	Meristem_Endocortex	1.96531	17	Os04g0233400	Cortex_like	1.83734	8
OG0000292	AT2G37170	Meristem_Endocortex	1.96531	17	Os02g0629200	Cortex_like	1.56417	16
OG0000292	AT2G37170	Meristem_Endocortex	1.96531	17	Os07g0448800	Cortex_like	1.43474	21
OG0000292	AT2G37170	Meristem_Endocortex	1.96531	17	Os04g0521100	Cortex_like	1.04195	52
OG0013259	AT5G40450	Meristem_Endocortex	1.71073	21	Os02g0131100	Cortex_like	0.995715	62
OG0000292	AT2G37180	Meristem_Endocortex	1.61209	24	Os04g0233400	Cortex_like	1.83734	8
OG0000292	AT2G37180	Meristem_Endocortex	1.61209	24	Os02g0629200	Cortex_like	1.56417	16
OG0000292	AT2G37180	Meristem_Endocortex	1.61209	24	Os07g0448800	Cortex_like	1.43474	21
OG0000292	AT2G37180	Meristem_Endocortex	1.61209	24	Os04g0521100	Cortex_like	1.04195	52
OG0001348	AT2G34070	Meristem_Endocortex	1.52864	30	Os01g0652100	Cortex_like	0.630885	200
OG0000929	AT3G16240	Meristem_Endocortex	1.50298	32	Os02g0658100	Cortex_like	2.12873	4
OG0006921	AT5G64570	Meristem_Endocortex	1.48217	33	Os04g0640700	Cortex_like	1.04482	51
OG0000292	AT3G53420	Meristem_Endocortex	1.38155	41	Os04g0233400	Cortex_like	1.83734	8
OG0000292	AT3G53420	Meristem_Endocortex	1.38155	41	Os02g0629200	Cortex_like	1.56417	16
OG0000292	AT3G53420	Meristem_Endocortex	1.38155	41	Os07g0448800	Cortex_like	1.43474	21
OG0000292	AT3G53420	Meristem_Endocortex	1.38155	41	Os04g0521100	Cortex_like	1.04195	52
OG0003007	AT1G25230	Meristem_Endocortex	1.36511	43	Os03g0238600	Cortex_like	0.661627	176
OG0000416	AT3G61430	Meristem_Endocortex	1.3604	45	Os02g0666200	Cortex_like	1.55836	17
OG0000416	AT3G61430	Meristem_Endocortex	1.3604	45	Os04g0559700	Cortex_like	0.832438	104
OG0004664	AT3G09940	Meristem_Endocortex	1.22643	59	Os08g0557600	Cortex_like	0.947714	70
OG0002286	AT3G18820	Meristem_Endocortex	1.10006	76	Os01g0227300	Cortex_like	1.13568	44
OG0006264	AT3G02780	Meristem_Endocortex	1.06852	81	Os07g0546000	Cortex_like	0.671895	170
OG0000499	AT4G12510	Meristem_Endocortex	0.993895	100	Os04g0554500	Cortex_like	2.19644	1
OG0000499	AT4G12510	Meristem_Endocortex	0.993895	100	Os02g0662000	Cortex_like	2.15974	3
OG0000499	AT4G12510	Meristem_Endocortex	0.993895	100	Os04g0554600	Cortex_like	1.63533	14
OG0000499	AT1G12090	Meristem_Endocortex	0.976959	106	Os04g0554500	Cortex_like	2.19644	1
OG0000499	AT1G12090	Meristem_Endocortex	0.976959	106	Os02g0662000	Cortex_like	2.15974	3
OG0000499	AT1G12090	Meristem_Endocortex	0.976959	106	Os04g0554600	Cortex_like	1.63533	14
OG0004960	AT5G57150	Meristem_Endocortex	0.920911	127	Os04g0301500	Cortex_like	0.728099	148
OG0001057	AT4G39980	Meristem_Endocortex	0.818524	167	Os03g0389700	Cortex_like	0.637099	195
OG0000499	AT4G12520	Meristem_Endocortex	0.778193	180	Os04g0554500	Cortex_like	2.19644	1
OG0000499	AT4G12520	Meristem_Endocortex	0.778193	180	Os02g0662000	Cortex_like	2.15974	3
OG0000499	AT4G12520	Meristem_Endocortex	0.778193	180	Os04g0554600	Cortex_like	1.63533	14
OG0006375	AT3G61440	Meristem_Endocortex	0.777621	182	Os04g0165700	Cortex_like	0.635428	198

## Sheet: ATH_Maize
Table S2: Pairwise comparison of Arabidopsis vs Maize.
Orthogroup	ATH_MG	ATH_clusters	ATH_avg_log2FC	ATH_rank	Maize_MG	Maize_clusters	Maize_avg_log2FC	Maize_rank
OG0001727	AT4G35350	Xylem	5.05762	1	Zm00001d035689	Xylem	3.47134	1
OG0001727	AT4G35350	Xylem	5.05762	1	Zm00001d011787	Xylem	1.74599	7			Note: Trichoblast = Hair
OG0001727	AT1G20850	Xylem	4.27247	2	Zm00001d035689	Xylem	3.47134	1			Note: Atrichoblast = Nonhair
OG0001727	AT1G20850	Xylem	4.27247	2	Zm00001d011787	Xylem	1.74599	7
OG0008357	AT2G28315	Xylem	2.55603	11	Zm00001d017282	Xylem	0.715923	143
OG0003708	AT5G03170	Xylem	2.13164	19	Zm00001d039770	Xylem	1.08535	39
OG0003109	AT1G35780	Xylem	2.04712	21	Zm00001d006910	Xylem	0.722049	138
OG0003708	AT5G60490	Xylem	1.64667	35	Zm00001d039770	Xylem	1.08535	39
OG0000146	AT4G36160	Xylem	1.53997	43	Zm00001d002828	Xylem	1.68445	8
OG0010741	AT1G79620	Xylem	1.46169	52	Zm00001d029012	Xylem	0.913295	63
OG0001320	AT2G47500	Xylem	1.44617	54	Zm00001d028830	Xylem	0.82057	88
OG0003416	AT3G06035	Xylem	1.42731	57	Zm00001d007045	Xylem	0.895322	65
OG0004601	AT2G46225	Xylem	1.41373	59	Zm00001d009707	Xylem	0.776268	110
OG0003436	AT3G10740	Xylem	1.29069	69	Zm00001d044648	Xylem	1.46435	13
OG0006150	AT3G59690	Xylem	1.219	83	Zm00001d012167	Xylem	1.29373	23
OG0011478	AT2G04850	Xylem	1.17973	90	Zm00001d028170	Xylem	1.02872	47
OG0000146	AT1G12260	Xylem	1.16075	91	Zm00001d002828	Xylem	1.68445	8
OG0004504	AT2G04780	Xylem	1.08469	109	Zm00001d020903	Xylem	0.838547	82
OG0001099	AT2G34410	Xylem	0.993816	134	Zm00001d039144	Xylem	0.676445	176
OG0000221	AT1G70490	Xylem	0.96025	144	Zm00001d008295	Xylem	0.74712	120
OG0000327	AT1G75840	Xylem	0.921269	158	Zm00001d015036	Xylem	0.886542	68
OG0002535	AT2G21300	Xylem	0.883128	172	Zm00001d025951	Xylem	0.706224	150
OG0000499	AT1G12090	Cortex	4.25727	1	Zm00001d017508	Cortex	2.06405	1
OG0000499	AT1G12090	Cortex	4.25727	1	Zm00001d026163	Cortex	1.92558	4
OG0000499	AT1G12090	Cortex	4.25727	1	Zm00001d026162	Cortex	1.92	6
OG0000499	AT1G12090	Cortex	4.25727	1	Zm00001d051384	Cortex	0.730556	190
OG0000101	AT1G75780	Cortex	2.18592	9	Zm00001d033457	Cortex	1.26392	28
OG0000499	AT4G12520	Cortex	1.77571	16	Zm00001d017508	Cortex	2.06405	1
OG0000499	AT4G12520	Cortex	1.77571	16	Zm00001d026163	Cortex	1.92558	4
OG0000499	AT4G12520	Cortex	1.77571	16	Zm00001d026162	Cortex	1.92	6
OG0000499	AT4G12520	Cortex	1.77571	16	Zm00001d051384	Cortex	0.730556	190
OG0000416	AT4G23400	Cortex	1.76301	17	Zm00001d002690	Cortex	1.06059	51
OG0000416	AT4G23400	Cortex	1.76301	17	Zm00001d017526	Cortex	1.00057	64
OG0000499	AT1G62510	Cortex	1.65659	24	Zm00001d017508	Cortex	2.06405	1
OG0000499	AT1G62510	Cortex	1.65659	24	Zm00001d026163	Cortex	1.92558	4
OG0000499	AT1G62510	Cortex	1.65659	24	Zm00001d026162	Cortex	1.92	6
OG0000499	AT1G62510	Cortex	1.65659	24	Zm00001d051384	Cortex	0.730556	190
OG0000499	AT4G12510	Cortex	1.62941	25	Zm00001d017508	Cortex	2.06405	1
OG0000499	AT4G12510	Cortex	1.62941	25	Zm00001d026163	Cortex	1.92558	4
OG0000499	AT4G12510	Cortex	1.62941	25	Zm00001d026162	Cortex	1.92	6
OG0000499	AT4G12510	Cortex	1.62941	25	Zm00001d051384	Cortex	0.730556	190
OG0000101	AT1G20010	Cortex	1.53008	36	Zm00001d033457	Cortex	1.26392	28
OG0001348	AT2G42570	Cortex	1.41711	48	Zm00001d044037	Cortex	1.0416	54
OG0000292	AT5G60660	Cortex	1.41207	50	Zm00001d019565	Cortex	1.10266	45
OG0000292	AT5G60660	Cortex	1.41207	50	Zm00001d017288	Cortex	1.06906	50
OG0001348	AT2G34070	Cortex	1.34682	56	Zm00001d044037	Cortex	1.0416	54
OG0006369	AT3G18830	Cortex	1.31693	59	Zm00001d021935	Cortex	0.781353	156
OG0000416	AT4G00430	Cortex	1.30684	61	Zm00001d002690	Cortex	1.06059	51
OG0000416	AT4G00430	Cortex	1.30684	61	Zm00001d017526	Cortex	1.00057	64
OG0000416	AT3G61430	Cortex	1.30363	62	Zm00001d002690	Cortex	1.06059	51
OG0000416	AT3G61430	Cortex	1.30363	62	Zm00001d017526	Cortex	1.00057	64
OG0012819	AT5G26340	Cortex	1.28647	65	Zm00001d028230	Cortex	1.09352	48
OG0000292	AT3G53420	Cortex	1.10517	85	Zm00001d019565	Cortex	1.10266	45
OG0000292	AT3G53420	Cortex	1.10517	85	Zm00001d017288	Cortex	1.06906	50
OG0000292	AT2G37170	Cortex	1.05938	95	Zm00001d019565	Cortex	1.10266	45
OG0000292	AT2G37170	Cortex	1.05938	95	Zm00001d017288	Cortex	1.06906	50
OG0011969	AT3G57520	Cortex	0.910974	138	Zm00001d019163	Cortex	1.53754	9
OG0013259	AT5G40450	Cortex	0.894131	144	Zm00001d015138	Cortex	1.02176	60
OG0000929	AT3G16240	Cortex	0.864429	150	Zm00001d026177	Cortex	1.31037	19
OG0000929	AT3G16240	Cortex	0.864429	150	Zm00001d051362	Cortex	1.28827	24
OG0000965	AT5G13750	Cortex	0.832571	160	Zm00001d005001	Cortex	1.06056	52
OG0000480	AT4G25260	Cortex	0.816376	171	Zm00001d014757	Cortex	0.931737	83
OG0000929	AT4G17340	Cortex	0.78278	182	Zm00001d026177	Cortex	1.31037	19
OG0000929	AT4G17340	Cortex	0.78278	182	Zm00001d051362	Cortex	1.28827	24
OG0001441	AT2G37640	Cortex	0.778207	186	Zm00001d012957	Cortex	1.03434	55
OG0000416	AT1G01620	Cortex	0.776796	189	Zm00001d002690	Cortex	1.06059	51
OG0000416	AT1G01620	Cortex	0.776796	189	Zm00001d017526	Cortex	1.00057	64
OG0000929	AT5G47450	Cortex	0.770332	195	Zm00001d026177	Cortex	1.31037	19
OG0000929	AT5G47450	Cortex	0.770332	195	Zm00001d051362	Cortex	1.28827	24
OG0000378	AT3G29035	Cortex	0.770127	196	Zm00001d003414	Cortex	0.828962	128
OG0000292	AT2G37170	Meristem_Endocortex	1.96531	17	Zm00001d019565	Cortex	1.10266	45
OG0000292	AT2G37170	Meristem_Endocortex	1.96531	17	Zm00001d017288	Cortex	1.06906	50
OG0013259	AT5G40450	Meristem_Endocortex	1.71073	21	Zm00001d015138	Cortex	1.02176	60
OG0000292	AT2G37180	Meristem_Endocortex	1.61209	24	Zm00001d019565	Cortex	1.10266	45
OG0000292	AT2G37180	Meristem_Endocortex	1.61209	24	Zm00001d017288	Cortex	1.06906	50
OG0001348	AT2G34070	Meristem_Endocortex	1.52864	30	Zm00001d044037	Cortex	1.0416	54
OG0000929	AT3G16240	Meristem_Endocortex	1.50298	32	Zm00001d026177	Cortex	1.31037	19
OG0000929	AT3G16240	Meristem_Endocortex	1.50298	32	Zm00001d051362	Cortex	1.28827	24
OG0008321	AT2G36830	Meristem_Endocortex	1.47222	34	Zm00001d027652	Cortex	0.90738	89
OG0001289	AT1G09560	Meristem_Endocortex	1.4544	37	Zm00001d008210	Cortex	1.05686	53
OG0000158	AT1G17190	Meristem_Endocortex	1.39049	40	Zm00001d018809	Cortex	0.845436	114
OG0000292	AT3G53420	Meristem_Endocortex	1.38155	41	Zm00001d019565	Cortex	1.10266	45
OG0000292	AT3G53420	Meristem_Endocortex	1.38155	41	Zm00001d017288	Cortex	1.06906	50
OG0000888	AT2G38240	Meristem_Endocortex	1.37633	42	Zm00001d012456	Cortex	1.12864	39
OG0000416	AT3G61430	Meristem_Endocortex	1.3604	45	Zm00001d002690	Cortex	1.06059	51
OG0000416	AT3G61430	Meristem_Endocortex	1.3604	45	Zm00001d017526	Cortex	1.00057	64
OG0000499	AT4G12510	Meristem_Endocortex	0.993895	100	Zm00001d017508	Cortex	2.06405	1
OG0000499	AT4G12510	Meristem_Endocortex	0.993895	100	Zm00001d026163	Cortex	1.92558	4
OG0000499	AT4G12510	Meristem_Endocortex	0.993895	100	Zm00001d026162	Cortex	1.92	6
OG0000499	AT4G12510	Meristem_Endocortex	0.993895	100	Zm00001d051384	Cortex	0.730556	190
OG0000499	AT1G12090	Meristem_Endocortex	0.976959	106	Zm00001d017508	Cortex	2.06405	1
OG0000499	AT1G12090	Meristem_Endocortex	0.976959	106	Zm00001d026163	Cortex	1.92558	4
OG0000499	AT1G12090	Meristem_Endocortex	0.976959	106	Zm00001d026162	Cortex	1.92	6
OG0000499	AT1G12090	Meristem_Endocortex	0.976959	106	Zm00001d051384	Cortex	0.730556	190
OG0001421	AT1G43160	Meristem_Endocortex	0.953162	109	Zm00001d053195	Cortex	0.842438	117
OG0001421	AT1G43160	Meristem_Endocortex	0.953162	109	Zm00001d010175	Cortex	0.7238	194
OG0000202	AT4G16380	Meristem_Endocortex	0.953059	110	Zm00001d034037	Cortex	0.838566	122
OG0000325	AT5G04340	Meristem_Endocortex	0.947249	115	Zm00001d047330	Cortex	0.859958	106
OG0011969	AT3G57520	Meristem_Endocortex	0.848503	157	Zm00001d019163	Cortex	1.53754	9
OG0000499	AT4G12520	Meristem_Endocortex	0.778193	180	Zm00001d017508	Cortex	2.06405	1
OG0000499	AT4G12520	Meristem_Endocortex	0.778193	180	Zm00001d026163	Cortex	1.92558	4
OG0000499	AT4G12520	Meristem_Endocortex	0.778193	180	Zm00001d026162	Cortex	1.92	6
OG0000499	AT4G12520	Meristem_Endocortex	0.778193	180	Zm00001d051384	Cortex	0.730556	190
OG0000418	AT2G33790	Atrichoblast2	3.01401	1	Zm00001d043590	Epidermis	1.54621	37
OG0003476	AT3G60245	Atrichoblast2	1.89344	11	Zm00001d009509	Epidermis	0.996022	154
OG0000377	AT2G27710	Atrichoblast2	1.84768	13	Zm00001d001899	Epidermis	1.0649	128
OG0000746	AT5G45775	Atrichoblast2	1.82218	18	Zm00001d046317	Epidermis	1.0482	137
OG0002811	AT5G15200	Atrichoblast2	1.74839	26	Zm00001d047186	Epidermis	1.06054	129
OG0003373	AT5G56710	Atrichoblast2	1.73185	31	Zm00001d045889	Epidermis	0.962879	169
OG0001732	AT2G34480	Atrichoblast2	1.72931	32	Zm00001d009579	Epidermis	0.944062	182
OG0004489	AT2G45050	Atrichoblast2	1.7169	36	Zm00001d047081	Epidermis	1.08654	125
OG0001863	AT2G39460	Atrichoblast2	1.70063	39	Zm00001d003127	Epidermis	0.94071	185
OG0000418	AT1G28290	Atrichoblast2	1.69806	41	Zm00001d043590	Epidermis	1.54621	37
OG0001045	AT2G41840	Atrichoblast2	1.69372	42	Zm00001d034550	Epidermis	0.956416	174
OG0001863	AT3G55280	Atrichoblast2	1.66455	48	Zm00001d003127	Epidermis	0.94071	185
OG0001127	AT3G09200	Atrichoblast2	1.64361	50	Zm00001d049619	Epidermis	1.12181	111
OG0001017	AT1G41880	Atrichoblast2	1.59501	61	Zm00001d052075	Epidermis	1.04942	136
OG0000832	AT3G04400	Atrichoblast2	1.58023	63	Zm00001d048368	Epidermis	0.952898	180
OG0001378	AT1G72370	Atrichoblast2	1.55832	71	Zm00001d006871	Epidermis	0.972359	164
OG0002565	AT2G36160	Atrichoblast2	1.55494	72	Zm00001d036568	Epidermis	0.956448	173
OG0000746	AT4G18730	Atrichoblast2	1.55009	75	Zm00001d046317	Epidermis	1.0482	137
OG0001061	AT1G43170	Atrichoblast2	1.54954	77	Zm00001d004839	Epidermis	0.932414	192
OG0001732	AT3G14600	Atrichoblast2	1.53187	80	Zm00001d009579	Epidermis	0.944062	182
OG0001017	AT3G55750	Atrichoblast2	1.52127	82	Zm00001d052075	Epidermis	1.04942	136
OG0000377	AT2G27720	Atrichoblast2	1.50432	88	Zm00001d001899	Epidermis	1.0649	128
OG0002481	AT3G56340	Atrichoblast2	1.49534	91	Zm00001d012992	Epidermis	1.01442	146
OG0002565	AT3G11510	Atrichoblast2	1.4728	96	Zm00001d036568	Epidermis	0.956448	173
OG0001158	AT5G27700	Atrichoblast2	1.40895	116	Zm00001d029124	Epidermis	0.942418	184
OG0001328	AT1G69620	Atrichoblast2	1.37778	126	Zm00001d032181	Epidermis	1.12707	108
OG0001717	AT1G02780	Atrichoblast2	1.37261	128	Zm00001d045069	Epidermis	1.20177	87
OG0003540	AT3G06700	Atrichoblast2	1.34902	132	Zm00001d010030	Epidermis	1.05804	130
OG0001328	AT3G28900	Atrichoblast2	1.34075	138	Zm00001d032181	Epidermis	1.12707	108
OG0000056	AT5G59690	Atrichoblast2	1.32897	139	Zm00001d021477	Epidermis	1.69382	23
OG0000056	AT5G59690	Atrichoblast2	1.32897	139	Zm00001d027394	Epidermis	1.67075	27
OG0000056	AT5G59690	Atrichoblast2	1.32897	139	Zm00001d002546	Epidermis	1.60148	30
OG0000056	AT5G59690	Atrichoblast2	1.32897	139	Zm00001d020585	Epidermis	1.55688	34
OG0000056	AT5G59690	Atrichoblast2	1.32897	139	Zm00001d051478	Epidermis	1.54211	39
OG0000056	AT5G59690	Atrichoblast2	1.32897	139	Zm00001d005791	Epidermis	1.50176	45
OG0000056	AT5G59690	Atrichoblast2	1.32897	139	Zm00001d008669	Epidermis	1.4132	55
OG0000056	AT5G59690	Atrichoblast2	1.32897	139	Zm00001d002543	Epidermis	1.31378	62
OG0000056	AT5G59690	Atrichoblast2	1.32897	139	Zm00001d020584	Epidermis	1.24663	79
OG0000056	AT5G59690	Atrichoblast2	1.32897	139	Zm00001d026015	Epidermis	1.16687	96
OG0000056	AT5G59690	Atrichoblast2	1.32897	139	Zm00001d012439	Epidermis	1.14296	101
OG0000056	AT5G59690	Atrichoblast2	1.32897	139	Zm00001d010575	Epidermis	0.977299	161
OG0000056	AT5G59690	Atrichoblast2	1.32897	139	Zm00001d039733	Epidermis	0.966722	167
OG0000832	AT2G33370	Atrichoblast2	1.23292	162	Zm00001d048368	Epidermis	0.952898	180
OG0000746	AT3G58700	Atrichoblast2	1.22574	164	Zm00001d046317	Epidermis	1.0482	137
OG0001671	AT1G21750	Atrichoblast2	1.21701	168	Zm00001d007301	Epidermis	1.134	103
OG0001912	AT2G19750	Atrichoblast2	1.20097	170	Zm00001d018410	Epidermis	1.18592	92
OG0003373	AT4G26230	Atrichoblast2	1.19881	171	Zm00001d045889	Epidermis	0.962879	169
OG0001912	AT4G29390	Atrichoblast2	1.16725	178	Zm00001d018410	Epidermis	1.18592	92
OG0001158	AT3G53890	Atrichoblast2	1.15117	181	Zm00001d029124	Epidermis	0.942418	184
OG0003373	AT2G19740	Atrichoblast2	1.14906	182	Zm00001d045889	Epidermis	0.962879	169
OG0002481	AT2G40590	Atrichoblast2	1.1463	184	Zm00001d012992	Epidermis	1.01442	146
OG0002315	AT1G54690	Atrichoblast2	1.14373	185	Zm00001d023901	Epidermis	1.23881	80
OG0008904	AT3G19820	Atrichoblast2	1.13607	189	Zm00001d014887	Epidermis	1.11479	112
OG0004105	AT1G27400	Atrichoblast2	1.91695	6	Zm00001d037732	Endodermal_Initials	1.0905	35
OG0004105	AT1G27400	Atrichoblast2	1.91695	6	Zm00001d049815	Endodermal_Initials	0.848439	149
OG0000905	AT2G37190	Atrichoblast2	1.91572	7	Zm00001d051543	Endodermal_Initials	1.07871	40
OG0000905	AT2G37190	Atrichoblast2	1.91572	7	Zm00001d002450	Endodermal_Initials	0.811857	178
OG0002512	AT2G18020	Atrichoblast2	1.91187	8	Zm00001d041568	Endodermal_Initials	0.846588	152
OG0001301	AT2G32060	Atrichoblast2	1.90961	9	Zm00001d039106	Endodermal_Initials	1.00177	60
OG0003476	AT3G60245	Atrichoblast2	1.89344	11	Zm00001d009509	Endodermal_Initials	1.11675	29
OG0002614	AT5G27850	Atrichoblast2	1.84773	12	Zm00001d009848	Endodermal_Initials	0.891105	124
OG0000377	AT2G27710	Atrichoblast2	1.84768	13	Zm00001d009652	Endodermal_Initials	1.05	46
OG0000377	AT2G27710	Atrichoblast2	1.84768	13	Zm00001d009657	Endodermal_Initials	0.962809	77
OG0000377	AT2G27710	Atrichoblast2	1.84768	13	Zm00001d001899	Endodermal_Initials	0.948023	86
OG0000377	AT2G27710	Atrichoblast2	1.84768	13	Zm00001d009653	Endodermal_Initials	0.820033	173
OG0001454	AT3G62870	Atrichoblast2	1.84647	14	Zm00001d031640	Endodermal_Initials	1.34391	6
OG0001454	AT3G62870	Atrichoblast2	1.84647	14	Zm00001d006100	Endodermal_Initials	0.947416	87
OG0001290	AT1G09690	Atrichoblast2	1.82788	16	Zm00001d014082	Endodermal_Initials	1.08139	38
OG0001290	AT1G09690	Atrichoblast2	1.82788	16	Zm00001d027618	Endodermal_Initials	0.854773	147
OG0001290	AT1G09690	Atrichoblast2	1.82788	16	Zm00001d032760	Endodermal_Initials	0.799826	184
OG0000746	AT5G45775	Atrichoblast2	1.82218	18	Zm00001d010016	Endodermal_Initials	1.18974	18
OG0000746	AT5G45775	Atrichoblast2	1.82218	18	Zm00001d046317	Endodermal_Initials	1.03817	51
OG0000746	AT5G45775	Atrichoblast2	1.82218	18	Zm00001d053547	Endodermal_Initials	0.891625	122
OG0001301	AT1G15930	Atrichoblast2	1.82081	19	Zm00001d039106	Endodermal_Initials	1.00177	60
OG0001567	AT4G16720	Atrichoblast2	1.79937	20	Zm00001d006388	Endodermal_Initials	0.886042	130
OG0001567	AT4G16720	Atrichoblast2	1.79937	20	Zm00001d021511	Endodermal_Initials	0.862347	143
OG0000932	AT4G34670	Atrichoblast2	1.77464	22	Zm00001d048159	Endodermal_Initials	0.853925	148
OG0001806	AT3G16080	Atrichoblast2	1.77336	23	Zm00001d054065	Endodermal_Initials	0.899449	116
OG0002811	AT5G15200	Atrichoblast2	1.74839	26	Zm00001d047186	Endodermal_Initials	1.31737	7
OG0002550	AT4G27090	Atrichoblast2	1.73851	28	Zm00001d006287	Endodermal_Initials	1.01282	58
OG0001982	AT3G22230	Atrichoblast2	1.73729	29	Zm00001d036570	Endodermal_Initials	1.00116	61
OG0003373	AT5G56710	Atrichoblast2	1.73185	31	Zm00001d045889	Endodermal_Initials	1.25275	11
OG0001732	AT2G34480	Atrichoblast2	1.72931	32	Zm00001d009579	Endodermal_Initials	0.950512	84
OG0001863	AT2G39460	Atrichoblast2	1.70063	39	Zm00001d003127	Endodermal_Initials	0.907304	109
OG0001863	AT2G39460	Atrichoblast2	1.70063	39	Zm00001d025784	Endodermal_Initials	0.897394	119
OG0001045	AT2G41840	Atrichoblast2	1.69372	42	Zm00001d034550	Endodermal_Initials	0.978415	73
OG0004105	AT1G67430	Atrichoblast2	1.69011	43	Zm00001d037732	Endodermal_Initials	1.0905	35
OG0004105	AT1G67430	Atrichoblast2	1.69011	43	Zm00001d049815	Endodermal_Initials	0.848439	149
OG0000905	AT5G60670	Atrichoblast2	1.68602	44	Zm00001d051543	Endodermal_Initials	1.07871	40
OG0000905	AT5G60670	Atrichoblast2	1.68602	44	Zm00001d002450	Endodermal_Initials	0.811857	178
OG0000924	AT2G01250	Atrichoblast2	1.67928	45	Zm00001d026254	Endodermal_Initials	0.960674	79
OG0001863	AT3G55280	Atrichoblast2	1.66455	48	Zm00001d003127	Endodermal_Initials	0.907304	109
OG0001863	AT3G55280	Atrichoblast2	1.66455	48	Zm00001d025784	Endodermal_Initials	0.897394	119
OG0001982	AT4G15000	Atrichoblast2	1.64659	49	Zm00001d036570	Endodermal_Initials	1.00116	61
OG0001127	AT3G09200	Atrichoblast2	1.64361	50	Zm00001d049619	Endodermal_Initials	1.02486	57
OG0001127	AT3G09200	Atrichoblast2	1.64361	50	Zm00001d035201	Endodermal_Initials	0.888347	128
OG0003432	AT3G45030	Atrichoblast2	1.61643	54	Zm00001d028426	Endodermal_Initials	0.79646	185
OG0001208	AT5G41520	Atrichoblast2	1.60523	57	Zm00001d003672	Endodermal_Initials	0.928534	99
OG0001208	AT5G41520	Atrichoblast2	1.60523	57	Zm00001d025413	Endodermal_Initials	0.782626	199
OG0000627	AT3G04920	Atrichoblast2	1.6044	58	Zm00001d011741	Endodermal_Initials	0.984211	67
OG0001017	AT1G41880	Atrichoblast2	1.59501	61	Zm00001d052075	Endodermal_Initials	1.10541	31
OG0000832	AT3G04400	Atrichoblast2	1.58023	63	Zm00001d048368	Endodermal_Initials	1.09248	34
OG0000832	AT3G04400	Atrichoblast2	1.58023	63	Zm00001d051929	Endodermal_Initials	0.940746	88
OG0000930	AT5G23740	Atrichoblast2	1.57591	65	Zm00001d026286	Endodermal_Initials	0.825582	170
OG0000930	AT5G23740	Atrichoblast2	1.57591	65	Zm00001d002339	Endodermal_Initials	0.783442	198
OG0001423	AT1G48630	Atrichoblast2	1.57196	66	Zm00001d038923	Endodermal_Initials	0.882726	134
OG0001185	AT3G23390	Atrichoblast2	1.56497	69	Zm00001d021652	Endodermal_Initials	0.876742	137
OG0001454	AT2G47610	Atrichoblast2	1.56273	70	Zm00001d031640	Endodermal_Initials	1.34391	6
OG0001454	AT2G47610	Atrichoblast2	1.56273	70	Zm00001d006100	Endodermal_Initials	0.947416	87
OG0001378	AT1G72370	Atrichoblast2	1.55832	71	Zm00001d048253	Endodermal_Initials	1.12188	28
OG0001378	AT1G72370	Atrichoblast2	1.55832	71	Zm00001d006871	Endodermal_Initials	1.08302	36
OG0001378	AT1G72370	Atrichoblast2	1.55832	71	Zm00001d027527	Endodermal_Initials	0.9952	64
OG0002565	AT2G36160	Atrichoblast2	1.55494	72	Zm00001d000120	Endodermal_Initials	1.09858	33
OG0002565	AT2G36160	Atrichoblast2	1.55494	72	Zm00001d036568	Endodermal_Initials	1.0756	42
OG0000932	AT3G04840	Atrichoblast2	1.55392	73	Zm00001d048159	Endodermal_Initials	0.853925	148
OG0000746	AT4G18730	Atrichoblast2	1.55009	75	Zm00001d010016	Endodermal_Initials	1.18974	18
OG0000746	AT4G18730	Atrichoblast2	1.55009	75	Zm00001d046317	Endodermal_Initials	1.03817	51
OG0000746	AT4G18730	Atrichoblast2	1.55009	75	Zm00001d053547	Endodermal_Initials	0.891625	122
OG0001061	AT1G43170	Atrichoblast2	1.54954	77	Zm00001d004839	Endodermal_Initials	1.1911	17
OG0001061	AT1G43170	Atrichoblast2	1.54954	77	Zm00001d004841	Endodermal_Initials	0.921238	101
OG0001061	AT1G43170	Atrichoblast2	1.54954	77	Zm00001d003680	Endodermal_Initials	0.862008	144
OG0001061	AT1G43170	Atrichoblast2	1.54954	77	Zm00001d003683	Endodermal_Initials	0.833583	164
OG0000924	AT2G44120	Atrichoblast2	1.5415	78	Zm00001d026254	Endodermal_Initials	0.960674	79
OG0003292	AT3G11940	Atrichoblast2	1.53458	79	Zm00001d037929	Endodermal_Initials	0.93774	91
OG0001732	AT3G14600	Atrichoblast2	1.53187	80	Zm00001d009579	Endodermal_Initials	0.950512	84
OG0001017	AT3G55750	Atrichoblast2	1.52127	82	Zm00001d052075	Endodermal_Initials	1.10541	31
OG0001290	AT1G57660	Atrichoblast2	1.52023	83	Zm00001d014082	Endodermal_Initials	1.08139	38
OG0001290	AT1G57660	Atrichoblast2	1.52023	83	Zm00001d027618	Endodermal_Initials	0.854773	147
OG0001290	AT1G57660	Atrichoblast2	1.52023	83	Zm00001d032760	Endodermal_Initials	0.799826	184
OG0001290	AT1G09590	Atrichoblast2	1.51701	85	Zm00001d014082	Endodermal_Initials	1.08139	38
OG0001290	AT1G09590	Atrichoblast2	1.51701	85	Zm00001d027618	Endodermal_Initials	0.854773	147
OG0001290	AT1G09590	Atrichoblast2	1.51701	85	Zm00001d032760	Endodermal_Initials	0.799826	184
OG0001792	AT5G59850	Atrichoblast2	1.50948	86	Zm00001d009000	Endodermal_Initials	1.03099	54
OG0000377	AT2G27720	Atrichoblast2	1.50432	88	Zm00001d009652	Endodermal_Initials	1.05	46
OG0000377	AT2G27720	Atrichoblast2	1.50432	88	Zm00001d009657	Endodermal_Initials	0.962809	77
OG0000377	AT2G27720	Atrichoblast2	1.50432	88	Zm00001d001899	Endodermal_Initials	0.948023	86
OG0000377	AT2G27720	Atrichoblast2	1.50432	88	Zm00001d009653	Endodermal_Initials	0.820033	173
OG0002481	AT3G56340	Atrichoblast2	1.49534	91	Zm00001d012992	Endodermal_Initials	0.985686	66
OG0001567	AT4G17390	Atrichoblast2	1.48766	93	Zm00001d006388	Endodermal_Initials	0.886042	130
OG0001567	AT4G17390	Atrichoblast2	1.48766	93	Zm00001d021511	Endodermal_Initials	0.862347	143
OG0002565	AT3G11510	Atrichoblast2	1.4728	96	Zm00001d000120	Endodermal_Initials	1.09858	33
OG0002565	AT3G11510	Atrichoblast2	1.4728	96	Zm00001d036568	Endodermal_Initials	1.0756	42
OG0000413	AT3G05020	Atrichoblast2	1.46556	100	Zm00001d023887	Endodermal_Initials	0.997578	62
OG0006226	AT3G61110	Atrichoblast2	1.46487	101	Zm00001d016491	Endodermal_Initials	1.0816	37
OG0001374	AT1G18540	Atrichoblast2	1.45582	102	Zm00001d050921	Endodermal_Initials	0.996767	63
OG0001374	AT1G18540	Atrichoblast2	1.45582	102	Zm00001d017047	Endodermal_Initials	0.934928	95
OG0001374	AT1G18540	Atrichoblast2	1.45582	102	Zm00001d050920	Endodermal_Initials	0.800778	183
OG0002512	AT4G36130	Atrichoblast2	1.44166	106	Zm00001d041568	Endodermal_Initials	0.846588	152
OG0003292	AT2G37270	Atrichoblast2	1.43719	109	Zm00001d037929	Endodermal_Initials	0.93774	91
OG0003604	AT4G18100	Atrichoblast2	1.42424	111	Zm00001d006064	Endodermal_Initials	1.16714	21
OG0003604	AT4G18100	Atrichoblast2	1.42424	111	Zm00001d021020	Endodermal_Initials	0.837848	158
OG0000413	AT1G54580	Atrichoblast2	1.42408	112	Zm00001d023887	Endodermal_Initials	0.997578	62
OG0001806	AT1G52300	Atrichoblast2	1.4162	114	Zm00001d054065	Endodermal_Initials	0.899449	116
OG0000627	AT5G28060	Atrichoblast2	1.41591	115	Zm00001d011741	Endodermal_Initials	0.984211	67
OG0001158	AT5G27700	Atrichoblast2	1.40895	116	Zm00001d029124	Endodermal_Initials	1.22277	12
OG0002614	AT3G05590	Atrichoblast2	1.40866	117	Zm00001d009848	Endodermal_Initials	0.891105	124
OG0000930	AT3G48930	Atrichoblast2	1.40532	118	Zm00001d026286	Endodermal_Initials	0.825582	170
OG0000930	AT3G48930	Atrichoblast2	1.40532	118	Zm00001d002339	Endodermal_Initials	0.783442	198
OG0001328	AT1G69620	Atrichoblast2	1.37778	126	Zm00001d032181	Endodermal_Initials	1.3511	5
OG0004675	AT5G64140	Atrichoblast2	1.37747	127	Zm00001d047697	Endodermal_Initials	0.872016	139
OG0001717	AT1G02780	Atrichoblast2	1.37261	128	Zm00001d045069	Endodermal_Initials	1.20961	14
OG0003540	AT3G06700	Atrichoblast2	1.34902	132	Zm00001d010030	Endodermal_Initials	0.983147	68
OG0001208	AT5G52650	Atrichoblast2	1.34639	133	Zm00001d003672	Endodermal_Initials	0.928534	99
OG0001208	AT5G52650	Atrichoblast2	1.34639	133	Zm00001d025413	Endodermal_Initials	0.782626	199
OG0004675	AT5G03850	Atrichoblast2	1.34095	137	Zm00001d047697	Endodermal_Initials	0.872016	139
OG0001328	AT3G28900	Atrichoblast2	1.34075	138	Zm00001d032181	Endodermal_Initials	1.3511	5
OG0001445	AT3G53870	Atrichoblast2	1.30747	145	Zm00001d022111	Endodermal_Initials	0.981172	69
OG0001445	AT3G53870	Atrichoblast2	1.30747	145	Zm00001d024511	Endodermal_Initials	0.96165	78
OG0001445	AT5G35530	Atrichoblast2	1.26648	155	Zm00001d022111	Endodermal_Initials	0.981172	69
OG0001445	AT5G35530	Atrichoblast2	1.26648	155	Zm00001d024511	Endodermal_Initials	0.96165	78
OG0003432	AT5G62300	Atrichoblast2	1.23863	160	Zm00001d028426	Endodermal_Initials	0.79646	185
OG0000832	AT2G33370	Atrichoblast2	1.23292	162	Zm00001d048368	Endodermal_Initials	1.09248	34
OG0000832	AT2G33370	Atrichoblast2	1.23292	162	Zm00001d051929	Endodermal_Initials	0.940746	88
OG0000746	AT3G58700	Atrichoblast2	1.22574	164	Zm00001d010016	Endodermal_Initials	1.18974	18
OG0000746	AT3G58700	Atrichoblast2	1.22574	164	Zm00001d046317	Endodermal_Initials	1.03817	51
OG0000746	AT3G58700	Atrichoblast2	1.22574	164	Zm00001d053547	Endodermal_Initials	0.891625	122
OG0000174	AT5G60390	Atrichoblast2	1.22091	165	Zm00001d009868	Endodermal_Initials	0.894296	121
OG0001208	AT4G25740	Atrichoblast2	1.21894	166	Zm00001d003672	Endodermal_Initials	0.928534	99
OG0001208	AT4G25740	Atrichoblast2	1.21894	166	Zm00001d025413	Endodermal_Initials	0.782626	199
OG0003432	AT3G47370	Atrichoblast2	1.21127	169	Zm00001d028426	Endodermal_Initials	0.79646	185
OG0001912	AT2G19750	Atrichoblast2	1.20097	170	Zm00001d018410	Endodermal_Initials	1.14695	24
OG0003373	AT4G26230	Atrichoblast2	1.19881	171	Zm00001d045889	Endodermal_Initials	1.25275	11
OG0001531	AT5G02870	Atrichoblast2	1.17148	176	Zm00001d018957	Endodermal_Initials	0.832143	165
OG0001531	AT5G02870	Atrichoblast2	1.17148	176	Zm00001d007824	Endodermal_Initials	0.826097	169
OG0001445	AT2G31610	Atrichoblast2	1.16758	177	Zm00001d022111	Endodermal_Initials	0.981172	69
OG0001445	AT2G31610	Atrichoblast2	1.16758	177	Zm00001d024511	Endodermal_Initials	0.96165	78
OG0001912	AT4G29390	Atrichoblast2	1.16725	178	Zm00001d018410	Endodermal_Initials	1.14695	24
OG0001158	AT3G53890	Atrichoblast2	1.15117	181	Zm00001d029124	Endodermal_Initials	1.22277	12
OG0003373	AT2G19740	Atrichoblast2	1.14906	182	Zm00001d045889	Endodermal_Initials	1.25275	11
OG0002481	AT2G40590	Atrichoblast2	1.1463	184	Zm00001d012992	Endodermal_Initials	0.985686	66
OG0001792	AT1G07770	Atrichoblast2	1.14015	186	Zm00001d009000	Endodermal_Initials	1.03099	54
OG0001290	AT1G57860	Atrichoblast2	1.13814	187	Zm00001d014082	Endodermal_Initials	1.08139	38
OG0001290	AT1G57860	Atrichoblast2	1.13814	187	Zm00001d027618	Endodermal_Initials	0.854773	147
OG0001290	AT1G57860	Atrichoblast2	1.13814	187	Zm00001d032760	Endodermal_Initials	0.799826	184
OG0008904	AT3G19820	Atrichoblast2	1.13607	189	Zm00001d014887	Endodermal_Initials	0.956686	82
OG0000905	AT3G53430	Atrichoblast2	1.13087	191	Zm00001d051543	Endodermal_Initials	1.07871	40
OG0000905	AT3G53430	Atrichoblast2	1.13087	191	Zm00001d002450	Endodermal_Initials	0.811857	178
OG0000413	AT1G54630	Atrichoblast2	1.12995	192	Zm00001d023887	Endodermal_Initials	0.997578	62
OG0001792	AT3G46040	Atrichoblast2	1.10714	199	Zm00001d009000	Endodermal_Initials	1.03099	54
OG0004105	AT1G27400	Atrichoblast2	1.91695	6	Zm00001d037732	Endodermis2	0.874339	148
OG0000905	AT2G37190	Atrichoblast2	1.91572	7	Zm00001d051543	Endodermis2	0.874646	146
OG0000905	AT2G37190	Atrichoblast2	1.91572	7	Zm00001d002450	Endodermis2	0.815167	190
OG0001301	AT2G32060	Atrichoblast2	1.90961	9	Zm00001d039106	Endodermis2	0.851563	159
OG0003476	AT3G60245	Atrichoblast2	1.89344	11	Zm00001d009509	Endodermis2	0.896047	133
OG0001454	AT3G62870	Atrichoblast2	1.84647	14	Zm00001d031640	Endodermis2	1.11761	58
OG0001290	AT1G09690	Atrichoblast2	1.82788	16	Zm00001d027618	Endodermis2	0.868285	150
OG0001290	AT1G09690	Atrichoblast2	1.82788	16	Zm00001d014082	Endodermis2	0.861623	152
OG0000746	AT5G45775	Atrichoblast2	1.82218	18	Zm00001d010016	Endodermis2	1.04764	67
OG0001301	AT1G15930	Atrichoblast2	1.82081	19	Zm00001d039106	Endodermis2	0.851563	159
OG0001806	AT3G16080	Atrichoblast2	1.77336	23	Zm00001d054065	Endodermis2	0.807588	199
OG0002811	AT5G15200	Atrichoblast2	1.74839	26	Zm00001d047186	Endodermis2	1.04017	69
OG0001982	AT3G22230	Atrichoblast2	1.73729	29	Zm00001d036570	Endodermis2	0.922265	119
OG0003373	AT5G56710	Atrichoblast2	1.73185	31	Zm00001d045889	Endodermis2	1.02924	72
OG0004105	AT1G67430	Atrichoblast2	1.69011	43	Zm00001d037732	Endodermis2	0.874339	148
OG0000905	AT5G60670	Atrichoblast2	1.68602	44	Zm00001d051543	Endodermis2	0.874646	146
OG0000905	AT5G60670	Atrichoblast2	1.68602	44	Zm00001d002450	Endodermis2	0.815167	190
OG0001982	AT4G15000	Atrichoblast2	1.64659	49	Zm00001d036570	Endodermis2	0.922265	119
OG0001208	AT5G41520	Atrichoblast2	1.60523	57	Zm00001d003672	Endodermis2	0.819164	186
OG0001017	AT1G41880	Atrichoblast2	1.59501	61	Zm00001d052075	Endodermis2	0.88579	139
OG0000832	AT3G04400	Atrichoblast2	1.58023	63	Zm00001d048368	Endodermis2	0.95382	99
OG0000832	AT3G04400	Atrichoblast2	1.58023	63	Zm00001d051929	Endodermis2	0.839662	169
OG0001454	AT2G47610	Atrichoblast2	1.56273	70	Zm00001d031640	Endodermis2	1.11761	58
OG0001378	AT1G72370	Atrichoblast2	1.55832	71	Zm00001d027527	Endodermis2	0.926831	113
OG0001378	AT1G72370	Atrichoblast2	1.55832	71	Zm00001d048253	Endodermis2	0.877663	143
OG0002565	AT2G36160	Atrichoblast2	1.55494	72	Zm00001d036568	Endodermis2	0.906013	127
OG0002565	AT2G36160	Atrichoblast2	1.55494	72	Zm00001d000120	Endodermis2	0.861619	153
OG0000746	AT4G18730	Atrichoblast2	1.55009	75	Zm00001d010016	Endodermis2	1.04764	67
OG0001061	AT1G43170	Atrichoblast2	1.54954	77	Zm00001d004839	Endodermis2	0.915007	121
OG0001017	AT3G55750	Atrichoblast2	1.52127	82	Zm00001d052075	Endodermis2	0.88579	139
OG0001290	AT1G57660	Atrichoblast2	1.52023	83	Zm00001d027618	Endodermis2	0.868285	150
OG0001290	AT1G57660	Atrichoblast2	1.52023	83	Zm00001d014082	Endodermis2	0.861623	152
OG0001290	AT1G09590	Atrichoblast2	1.51701	85	Zm00001d027618	Endodermis2	0.868285	150
OG0001290	AT1G09590	Atrichoblast2	1.51701	85	Zm00001d014082	Endodermis2	0.861623	152
OG0001792	AT5G59850	Atrichoblast2	1.50948	86	Zm00001d009000	Endodermis2	0.911726	123
OG0002481	AT3G56340	Atrichoblast2	1.49534	91	Zm00001d012992	Endodermis2	0.829418	176
OG0002565	AT3G11510	Atrichoblast2	1.4728	96	Zm00001d036568	Endodermis2	0.906013	127
OG0002565	AT3G11510	Atrichoblast2	1.4728	96	Zm00001d000120	Endodermis2	0.861619	153
OG0006226	AT3G61110	Atrichoblast2	1.46487	101	Zm00001d016491	Endodermis2	1.03275	70
OG0003604	AT4G18100	Atrichoblast2	1.42424	111	Zm00001d006064	Endodermis2	0.967693	93
OG0001806	AT1G52300	Atrichoblast2	1.4162	114	Zm00001d054065	Endodermis2	0.807588	199
OG0001158	AT5G27700	Atrichoblast2	1.40895	116	Zm00001d029124	Endodermis2	1.01494	75
OG0001328	AT1G69620	Atrichoblast2	1.37778	126	Zm00001d032181	Endodermis2	1.07201	62
OG0001717	AT1G02780	Atrichoblast2	1.37261	128	Zm00001d045069	Endodermis2	0.972407	92
OG0003540	AT3G06700	Atrichoblast2	1.34902	132	Zm00001d010030	Endodermis2	0.908069	125
OG0001208	AT5G52650	Atrichoblast2	1.34639	133	Zm00001d003672	Endodermis2	0.819164	186
OG0001328	AT3G28900	Atrichoblast2	1.34075	138	Zm00001d032181	Endodermis2	1.07201	62
OG0000056	AT5G59690	Atrichoblast2	1.32897	139	Zm00001d027394	Endodermis2	0.897007	132
OG0000056	AT5G59690	Atrichoblast2	1.32897	139	Zm00001d005791	Endodermis2	0.895641	134
OG0000056	AT5G59690	Atrichoblast2	1.32897	139	Zm00001d020585	Endodermis2	0.874448	147
OG0001445	AT3G53870	Atrichoblast2	1.30747	145	Zm00001d024511	Endodermis2	0.81247	193
OG0001445	AT5G35530	Atrichoblast2	1.26648	155	Zm00001d024511	Endodermis2	0.81247	193
OG0000832	AT2G33370	Atrichoblast2	1.23292	162	Zm00001d048368	Endodermis2	0.95382	99
OG0000832	AT2G33370	Atrichoblast2	1.23292	162	Zm00001d051929	Endodermis2	0.839662	169
OG0000746	AT3G58700	Atrichoblast2	1.22574	164	Zm00001d010016	Endodermis2	1.04764	67
OG0000174	AT5G60390	Atrichoblast2	1.22091	165	Zm00001d009868	Endodermis2	0.833317	172
OG0001208	AT4G25740	Atrichoblast2	1.21894	166	Zm00001d003672	Endodermis2	0.819164	186
OG0001912	AT2G19750	Atrichoblast2	1.20097	170	Zm00001d018410	Endodermis2	0.953057	100
OG0003373	AT4G26230	Atrichoblast2	1.19881	171	Zm00001d045889	Endodermis2	1.02924	72
OG0001445	AT2G31610	Atrichoblast2	1.16758	177	Zm00001d024511	Endodermis2	0.81247	193
OG0001912	AT4G29390	Atrichoblast2	1.16725	178	Zm00001d018410	Endodermis2	0.953057	100
OG0001158	AT3G53890	Atrichoblast2	1.15117	181	Zm00001d029124	Endodermis2	1.01494	75
OG0003373	AT2G19740	Atrichoblast2	1.14906	182	Zm00001d045889	Endodermis2	1.02924	72
OG0002481	AT2G40590	Atrichoblast2	1.1463	184	Zm00001d012992	Endodermis2	0.829418	176
OG0001792	AT1G07770	Atrichoblast2	1.14015	186	Zm00001d009000	Endodermis2	0.911726	123
OG0001290	AT1G57860	Atrichoblast2	1.13814	187	Zm00001d027618	Endodermis2	0.868285	150
OG0001290	AT1G57860	Atrichoblast2	1.13814	187	Zm00001d014082	Endodermis2	0.861623	152
OG0000905	AT3G53430	Atrichoblast2	1.13087	191	Zm00001d051543	Endodermis2	0.874646	146
OG0000905	AT3G53430	Atrichoblast2	1.13087	191	Zm00001d002450	Endodermis2	0.815167	190
OG0001792	AT3G46040	Atrichoblast2	1.10714	199	Zm00001d009000	Endodermis2	0.911726	123
OG0001195	AT5G50720	Phloem	3.61184	2	Zm00001d031773	Endodermis1	1.51716	16
OG0001201	AT5G10625	Phloem	2.8954	10	Zm00001d040298	Endodermis1	1.76652	10
OG0001201	AT5G10625	Phloem	2.8954	10	Zm00001d008325	Endodermis1	1.13427	40
OG0006651	AT4G33660	Phloem	2.77688	11	Zm00001d019069	Endodermis1	2.10445	5
OG0007010	AT5G53120	Phloem	2.4431	16	Zm00001d053404	Endodermis1	1.19792	35
OG0007010	AT5G53120	Phloem	2.4431	16	Zm00001d046112	Endodermis1	1.08308	48
OG0000125	AT2G16740	Phloem	2.34923	18	Zm00001d053897	Endodermis1	1.45325	20
OG0001030	AT2G02130	Phloem	2.23233	21	Zm00001d027500	Endodermis1	2.20726	2
OG0009529	AT5G54660	Phloem	2.10369	22	Zm00001d038608	Endodermis1	0.96392	74
OG0001315	AT1G70670	Phloem	2.08832	23	Zm00001d037343	Endodermis1	1.23561	27
OG0001315	AT1G70670	Phloem	2.08832	23	Zm00001d044732	Endodermis1	0.738091	160
OG0005388	AT1G31812	Phloem	1.44898	59	Zm00001d024518	Endodermis1	0.67974	194
OG0001438	AT5G12140	Phloem	1.38204	68	Zm00001d038558	Endodermis1	1.22918	28
OG0000071	AT5G09810	Phloem	1.19892	105	Zm00001d012277	Endodermis1	0.707838	176
OG0000618	AT2G38640	Phloem	1.11647	122	Zm00001d052371	Endodermis1	0.861044	101
OG0000618	AT2G38640	Phloem	1.11647	122	Zm00001d052372	Endodermis1	0.742749	155
OG0001931	AT3G44220	Phloem	1.1032	126	Zm00001d052776	Endodermis1	0.700885	181
OG0000422	AT5G62890	Phloem	1.09454	129	Zm00001d020345	Endodermis1	0.878598	95
OG0000422	AT5G62890	Phloem	1.09454	129	Zm00001d032322	Endodermis1	0.868834	96
OG0008442	AT2G46630	Phloem	1.08648	131	Zm00001d040171	Endodermis1	0.998284	65
OG0000500	AT1G66200	Phloem	1.08034	135	Zm00001d033747	Endodermis1	1.85912	8
OG0001113	AT2G16600	Phloem	1.07618	136	Zm00001d030339	Endodermis1	1.05379	52
OG0000688	AT5G11100	Phloem	1.00074	158	Zm00001d007034	Endodermis1	0.800484	128
OG0000258	AT1G65960	Phloem	0.973857	163	Zm00001d033805	Endodermis1	0.831834	112
OG0001113	AT4G38740	Phloem	0.960364	167	Zm00001d030339	Endodermis1	1.05379	52
OG0001113	AT4G34870	Phloem	0.94359	173	Zm00001d030339	Endodermis1	1.05379	52
OG0000125	AT4G27960	Phloem	0.933682	177	Zm00001d053897	Endodermis1	1.45325	20
OG0001973	AT3G57870	Phloem	0.905016	184	Zm00001d048473	Endodermis1	0.948142	75
OG0001030	AT2G02130	Stele1	3.59556	1	Zm00001d027500	Endodermal_Initials	0.905755	112
OG0001806	AT1G52300	Stele1	1.51424	19	Zm00001d054065	Endodermal_Initials	0.899449	116
OG0003604	AT4G18100	Stele1	1.47188	24	Zm00001d006064	Endodermal_Initials	1.16714	21
OG0003604	AT4G18100	Stele1	1.47188	24	Zm00001d021020	Endodermal_Initials	0.837848	158
OG0002811	AT5G15200	Stele1	1.39011	30	Zm00001d047186	Endodermal_Initials	1.31737	7
OG0001717	AT1G02780	Stele1	1.38628	31	Zm00001d045069	Endodermal_Initials	1.20961	14
OG0000627	AT5G28060	Stele1	1.38036	33	Zm00001d011741	Endodermal_Initials	0.984211	67
OG0001982	AT4G15000	Stele1	1.38015	34	Zm00001d036570	Endodermal_Initials	1.00116	61
OG0002565	AT2G36160	Stele1	1.36236	38	Zm00001d000120	Endodermal_Initials	1.09858	33
OG0002565	AT2G36160	Stele1	1.36236	38	Zm00001d036568	Endodermal_Initials	1.0756	42
OG0000832	AT3G04400	Stele1	1.32991	44	Zm00001d048368	Endodermal_Initials	1.09248	34
OG0000832	AT3G04400	Stele1	1.32991	44	Zm00001d051929	Endodermal_Initials	0.940746	88
OG0001792	AT1G07770	Stele1	1.31028	49	Zm00001d009000	Endodermal_Initials	1.03099	54
OG0000930	AT3G48930	Stele1	1.30766	50	Zm00001d026286	Endodermal_Initials	0.825582	170
OG0000930	AT3G48930	Stele1	1.30766	50	Zm00001d002339	Endodermal_Initials	0.783442	198
OG0000746	AT4G18730	Stele1	1.28636	53	Zm00001d010016	Endodermal_Initials	1.18974	18
OG0000746	AT4G18730	Stele1	1.28636	53	Zm00001d046317	Endodermal_Initials	1.03817	51
OG0000746	AT4G18730	Stele1	1.28636	53	Zm00001d053547	Endodermal_Initials	0.891625	122
OG0003292	AT3G11940	Stele1	1.27777	55	Zm00001d037929	Endodermal_Initials	0.93774	91
OG0001732	AT2G34480	Stele1	1.27759	56	Zm00001d009579	Endodermal_Initials	0.950512	84
OG0001567	AT4G17390	Stele1	1.27322	58	Zm00001d006388	Endodermal_Initials	0.886042	130
OG0001567	AT4G17390	Stele1	1.27322	58	Zm00001d021511	Endodermal_Initials	0.862347	143
OG0001061	AT1G43170	Stele1	1.26809	59	Zm00001d004839	Endodermal_Initials	1.1911	17
OG0001061	AT1G43170	Stele1	1.26809	59	Zm00001d004841	Endodermal_Initials	0.921238	101
OG0001061	AT1G43170	Stele1	1.26809	59	Zm00001d003680	Endodermal_Initials	0.862008	144
OG0001061	AT1G43170	Stele1	1.26809	59	Zm00001d003683	Endodermal_Initials	0.833583	164
OG0002565	AT3G11510	Stele1	1.26545	60	Zm00001d000120	Endodermal_Initials	1.09858	33
OG0002565	AT3G11510	Stele1	1.26545	60	Zm00001d036568	Endodermal_Initials	1.0756	42
OG0006226	AT3G61110	Stele1	1.24869	66	Zm00001d016491	Endodermal_Initials	1.0816	37
OG0002614	AT5G27850	Stele1	1.22668	72	Zm00001d009848	Endodermal_Initials	0.891105	124
OG0002550	AT4G27090	Stele1	1.21899	75	Zm00001d006287	Endodermal_Initials	1.01282	58
OG0001208	AT5G41520	Stele1	1.21179	78	Zm00001d003672	Endodermal_Initials	0.928534	99
OG0001208	AT5G41520	Stele1	1.21179	78	Zm00001d025413	Endodermal_Initials	0.782626	199
OG0001454	AT2G47610	Stele1	1.19842	89	Zm00001d031640	Endodermal_Initials	1.34391	6
OG0001454	AT2G47610	Stele1	1.19842	89	Zm00001d006100	Endodermal_Initials	0.947416	87
OG0004105	AT1G67430	Stele1	1.19363	91	Zm00001d037732	Endodermal_Initials	1.0905	35
OG0004105	AT1G67430	Stele1	1.19363	91	Zm00001d049815	Endodermal_Initials	0.848439	149
OG0000377	AT2G27710	Stele1	1.1909	93	Zm00001d009652	Endodermal_Initials	1.05	46
OG0000377	AT2G27710	Stele1	1.1909	93	Zm00001d009657	Endodermal_Initials	0.962809	77
OG0000377	AT2G27710	Stele1	1.1909	93	Zm00001d001899	Endodermal_Initials	0.948023	86
OG0000377	AT2G27710	Stele1	1.1909	93	Zm00001d009653	Endodermal_Initials	0.820033	173
OG0001378	AT1G72370	Stele1	1.14799	103	Zm00001d048253	Endodermal_Initials	1.12188	28
OG0001378	AT1G72370	Stele1	1.14799	103	Zm00001d006871	Endodermal_Initials	1.08302	36
OG0001378	AT1G72370	Stele1	1.14799	103	Zm00001d027527	Endodermal_Initials	0.9952	64
OG0001127	AT3G09200	Stele1	1.14239	105	Zm00001d049619	Endodermal_Initials	1.02486	57
OG0001127	AT3G09200	Stele1	1.14239	105	Zm00001d035201	Endodermal_Initials	0.888347	128
OG0001454	AT3G62870	Stele1	1.13218	107	Zm00001d031640	Endodermal_Initials	1.34391	6
OG0001454	AT3G62870	Stele1	1.13218	107	Zm00001d006100	Endodermal_Initials	0.947416	87
OG0002614	AT3G05590	Stele1	1.12798	108	Zm00001d009848	Endodermal_Initials	0.891105	124
OG0001567	AT4G16720	Stele1	1.12368	111	Zm00001d006388	Endodermal_Initials	0.886042	130
OG0001567	AT4G16720	Stele1	1.12368	111	Zm00001d021511	Endodermal_Initials	0.862347	143
OG0003476	AT3G60245	Stele1	1.11965	113	Zm00001d009509	Endodermal_Initials	1.11675	29
OG0001445	AT3G53870	Stele1	1.1107	114	Zm00001d022111	Endodermal_Initials	0.981172	69
OG0001445	AT3G53870	Stele1	1.1107	114	Zm00001d024511	Endodermal_Initials	0.96165	78
OG0000627	AT3G04920	Stele1	1.10753	116	Zm00001d011741	Endodermal_Initials	0.984211	67
OG0002481	AT3G56340	Stele1	1.1031	117	Zm00001d012992	Endodermal_Initials	0.985686	66
OG0001531	AT5G02870	Stele1	1.09871	119	Zm00001d018957	Endodermal_Initials	0.832143	165
OG0001531	AT5G02870	Stele1	1.09871	119	Zm00001d007824	Endodermal_Initials	0.826097	169
OG0001328	AT1G69620	Stele1	1.0975	120	Zm00001d032181	Endodermal_Initials	1.3511	5
OG0002512	AT2G18020	Stele1	1.08742	126	Zm00001d041568	Endodermal_Initials	0.846588	152
OG0000377	AT2G27720	Stele1	1.06719	132	Zm00001d009652	Endodermal_Initials	1.05	46
OG0000377	AT2G27720	Stele1	1.06719	132	Zm00001d009657	Endodermal_Initials	0.962809	77
OG0000377	AT2G27720	Stele1	1.06719	132	Zm00001d001899	Endodermal_Initials	0.948023	86
OG0000377	AT2G27720	Stele1	1.06719	132	Zm00001d009653	Endodermal_Initials	0.820033	173
OG0001374	AT1G18540	Stele1	1.06569	133	Zm00001d050921	Endodermal_Initials	0.996767	63
OG0001374	AT1G18540	Stele1	1.06569	133	Zm00001d017047	Endodermal_Initials	0.934928	95
OG0001374	AT1G18540	Stele1	1.06569	133	Zm00001d050920	Endodermal_Initials	0.800778	183
OG0001290	AT1G57660	Stele1	1.06562	134	Zm00001d014082	Endodermal_Initials	1.08139	38
OG0001290	AT1G57660	Stele1	1.06562	134	Zm00001d027618	Endodermal_Initials	0.854773	147
OG0001290	AT1G57660	Stele1	1.06562	134	Zm00001d032760	Endodermal_Initials	0.799826	184
OG0000932	AT3G04840	Stele1	1.06559	135	Zm00001d048159	Endodermal_Initials	0.853925	148
OG0001185	AT3G23390	Stele1	1.05092	143	Zm00001d021652	Endodermal_Initials	0.876742	137
OG0000174	AT5G60390	Stele1	1.03747	148	Zm00001d009868	Endodermal_Initials	0.894296	121
OG0001158	AT3G53890	Stele1	1.0287	151	Zm00001d029124	Endodermal_Initials	1.22277	12
OG0000924	AT2G01250	Stele1	1.02662	152	Zm00001d026254	Endodermal_Initials	0.960674	79
OG0003373	AT5G56710	Stele1	1.02455	155	Zm00001d045889	Endodermal_Initials	1.25275	11
OG0000832	AT2G33370	Stele1	1.02282	157	Zm00001d048368	Endodermal_Initials	1.09248	34
OG0000832	AT2G33370	Stele1	1.02282	157	Zm00001d051929	Endodermal_Initials	0.940746	88
OG0001956	AT4G33865	Stele1	1.01197	160	Zm00001d041727	Endodermal_Initials	0.979477	71
OG0001863	AT2G39460	Stele1	1.00425	165	Zm00001d003127	Endodermal_Initials	0.907304	109
OG0001863	AT2G39460	Stele1	1.00425	165	Zm00001d025784	Endodermal_Initials	0.897394	119
OG0000905	AT2G37190	Stele1	0.988572	171	Zm00001d051543	Endodermal_Initials	1.07871	40
OG0000905	AT2G37190	Stele1	0.988572	171	Zm00001d002450	Endodermal_Initials	0.811857	178
OG0001045	AT2G41840	Stele1	0.985958	173	Zm00001d034550	Endodermal_Initials	0.978415	73
OG0003540	AT3G06700	Stele1	0.978131	174	Zm00001d010030	Endodermal_Initials	0.983147	68
OG0000905	AT3G53430	Stele1	0.968434	179	Zm00001d051543	Endodermal_Initials	1.07871	40
OG0000905	AT3G53430	Stele1	0.968434	179	Zm00001d002450	Endodermal_Initials	0.811857	178
OG0001017	AT3G55750	Stele1	0.956241	185	Zm00001d052075	Endodermal_Initials	1.10541	31
OG0000932	AT4G34670	Stele1	0.954371	189	Zm00001d048159	Endodermal_Initials	0.853925	148
OG0000930	AT5G23740	Stele1	0.947945	190	Zm00001d026286	Endodermal_Initials	0.825582	170
OG0000930	AT5G23740	Stele1	0.947945	190	Zm00001d002339	Endodermal_Initials	0.783442	198
OG0001732	AT3G14600	Stele1	0.933212	199	Zm00001d009579	Endodermal_Initials	0.950512	84
OG0001030	AT2G02130	Stele1	3.59556	1	Zm00001d027500	Endodermis2	2.27301	7
OG0001405	AT2G34140	Stele1	1.52876	17	Zm00001d010740	Endodermis2	0.822725	185
OG0001806	AT1G52300	Stele1	1.51424	19	Zm00001d054065	Endodermis2	0.807588	199
OG0003604	AT4G18100	Stele1	1.47188	24	Zm00001d006064	Endodermis2	0.967693	93
OG0002811	AT5G15200	Stele1	1.39011	30	Zm00001d047186	Endodermis2	1.04017	69
OG0001717	AT1G02780	Stele1	1.38628	31	Zm00001d045069	Endodermis2	0.972407	92
OG0001982	AT4G15000	Stele1	1.38015	34	Zm00001d036570	Endodermis2	0.922265	119
OG0002565	AT2G36160	Stele1	1.36236	38	Zm00001d036568	Endodermis2	0.906013	127
OG0002565	AT2G36160	Stele1	1.36236	38	Zm00001d000120	Endodermis2	0.861619	153
OG0000832	AT3G04400	Stele1	1.32991	44	Zm00001d048368	Endodermis2	0.95382	99
OG0000832	AT3G04400	Stele1	1.32991	44	Zm00001d051929	Endodermis2	0.839662	169
OG0001792	AT1G07770	Stele1	1.31028	49	Zm00001d009000	Endodermis2	0.911726	123
OG0000746	AT4G18730	Stele1	1.28636	53	Zm00001d010016	Endodermis2	1.04764	67
OG0001061	AT1G43170	Stele1	1.26809	59	Zm00001d004839	Endodermis2	0.915007	121
OG0002565	AT3G11510	Stele1	1.26545	60	Zm00001d036568	Endodermis2	0.906013	127
OG0002565	AT3G11510	Stele1	1.26545	60	Zm00001d000120	Endodermis2	0.861619	153
OG0006226	AT3G61110	Stele1	1.24869	66	Zm00001d016491	Endodermis2	1.03275	70
OG0001208	AT5G41520	Stele1	1.21179	78	Zm00001d003672	Endodermis2	0.819164	186
OG0001454	AT2G47610	Stele1	1.19842	89	Zm00001d031640	Endodermis2	1.11761	58
OG0004105	AT1G67430	Stele1	1.19363	91	Zm00001d037732	Endodermis2	0.874339	148
OG0001378	AT1G72370	Stele1	1.14799	103	Zm00001d027527	Endodermis2	0.926831	113
OG0001378	AT1G72370	Stele1	1.14799	103	Zm00001d048253	Endodermis2	0.877663	143
OG0001454	AT3G62870	Stele1	1.13218	107	Zm00001d031640	Endodermis2	1.11761	58
OG0003476	AT3G60245	Stele1	1.11965	113	Zm00001d009509	Endodermis2	0.896047	133
OG0001445	AT3G53870	Stele1	1.1107	114	Zm00001d024511	Endodermis2	0.81247	193
OG0002481	AT3G56340	Stele1	1.1031	117	Zm00001d012992	Endodermis2	0.829418	176
OG0001328	AT1G69620	Stele1	1.0975	120	Zm00001d032181	Endodermis2	1.07201	62
OG0001290	AT1G57660	Stele1	1.06562	134	Zm00001d027618	Endodermis2	0.868285	150
OG0001290	AT1G57660	Stele1	1.06562	134	Zm00001d014082	Endodermis2	0.861623	152
OG0001315	AT1G70670	Stele1	1.05991	140	Zm00001d037343	Endodermis2	1.12328	57
OG0000174	AT5G60390	Stele1	1.03747	148	Zm00001d009868	Endodermis2	0.833317	172
OG0001158	AT3G53890	Stele1	1.0287	151	Zm00001d029124	Endodermis2	1.01494	75
OG0003373	AT5G56710	Stele1	1.02455	155	Zm00001d045889	Endodermis2	1.02924	72
OG0000832	AT2G33370	Stele1	1.02282	157	Zm00001d048368	Endodermis2	0.95382	99
OG0000832	AT2G33370	Stele1	1.02282	157	Zm00001d051929	Endodermis2	0.839662	169
OG0001956	AT4G33865	Stele1	1.01197	160	Zm00001d041727	Endodermis2	0.812702	192
OG0000905	AT2G37190	Stele1	0.988572	171	Zm00001d051543	Endodermis2	0.874646	146
OG0000905	AT2G37190	Stele1	0.988572	171	Zm00001d002450	Endodermis2	0.815167	190
OG0003540	AT3G06700	Stele1	0.978131	174	Zm00001d010030	Endodermis2	0.908069	125
OG0000905	AT3G53430	Stele1	0.968434	179	Zm00001d051543	Endodermis2	0.874646	146
OG0000905	AT3G53430	Stele1	0.968434	179	Zm00001d002450	Endodermis2	0.815167	190
OG0001017	AT3G55750	Stele1	0.956241	185	Zm00001d052075	Endodermis2	0.88579	139

## Sheet: Rice_Maize
Table S2: Pairwise comparison of Rice vs Maize.
Orthogroup	Rice_MG	Rice_clusters	Rice_avg_log2FC	Rice_rank	Maize_MG	Maize_clusters	Maize_avg_log2FC	Maize_rank
OG0001727	Os05g0108600	Xylem	5.05168	2	Zm00001d035689	Xylem	3.47134	1
OG0001727	Os05g0108600	Xylem	5.05168	2	Zm00001d011787	Xylem	1.74599	7			Note: Trichoblast = Hair
OG0001727	Os01g0971400	Xylem	5.02988	3	Zm00001d035689	Xylem	3.47134	1			Note: Atrichoblast = Nonhair
OG0001727	Os01g0971400	Xylem	5.02988	3	Zm00001d011787	Xylem	1.74599	7
OG0002553	Os03g0850900	Xylem	4.6275	4	Zm00001d025564	Xylem	1.67842	9
OG0001148	Os02g0528100	Xylem	3.64834	7	Zm00001d016683	Xylem	0.840902	81
OG0001148	Os02g0528100	Xylem	3.64834	7	Zm00001d025338	Xylem	0.691674	163
OG0015317	Os01g0134900	Xylem	3.47963	8	Zm00001d039946	Xylem	1.38929	16
OG0001420	Os08g0546700	Xylem	3.34896	10	Zm00001d052734	Xylem	0.712037	145
OG0019657	Os02g0731400	Xylem	3.3149	11	Zm00001d017936	Xylem	1.3213	19
OG0015376	Os01g0260800	Xylem	3.23357	13	Zm00001d008312	Xylem	1.29506	22
OG0011478	Os03g0194300	Xylem	3.17964	16	Zm00001d028170	Xylem	1.02872	47
OG0007150	Os03g0817800	Xylem	3.17775	17	Zm00001d034621	Xylem	1.91456	4
OG0000327	Os02g0312600	Xylem	2.95625	19	Zm00001d015036	Xylem	0.886542	68
OG0013176	Os10g0412700	Xylem	2.73564	22	Zm00001d032972	Xylem	2.5642	2
OG0012971	Os10g0467800	Xylem	2.6661	24	Zm00001d032776	Xylem	1.21414	28
OG0009397	Os09g0422500	Xylem	2.61741	25	Zm00001d005775	Xylem	0.873609	75
OG0001148	Os04g0408600	Xylem	2.51912	29	Zm00001d016683	Xylem	0.840902	81
OG0001148	Os04g0408600	Xylem	2.51912	29	Zm00001d025338	Xylem	0.691674	163
OG0003708	Os05g0163300	Xylem	2.48168	30	Zm00001d039770	Xylem	1.08535	39
OG0000623	Os02g0114200	Xylem	2.40414	32	Zm00001d014983	Xylem	1.12661	34
OG0010741	Os03g0329700	Xylem	2.28179	36	Zm00001d029012	Xylem	0.913295	63
OG0003107	Os03g0209000	Xylem	2.19365	37	Zm00001d028043	Xylem	0.780302	105
OG0003109	Os07g0623600	Xylem	2.0386	40	Zm00001d006910	Xylem	0.722049	138
OG0009923	Os01g0273800	Xylem	2.01712	42	Zm00001d008255	Xylem	1.48439	11
OG0003102	Os12g0155200	Xylem	1.9986	43	Zm00001d023434	Xylem	1.14316	31
OG0002814	Os07g0604400	Xylem	1.92863	45	Zm00001d022082	Xylem	0.938209	57
OG0006438	Os04g0243700	Xylem	1.9212	46	Zm00001d004208	Xylem	1.32019	20
OG0004303	Os03g0123500	Xylem	1.89443	48	Zm00001d027431	Xylem	0.813055	92
OG0004303	Os03g0123500	Xylem	1.89443	48	Zm00001d048471	Xylem	0.674523	179
OG0007840	Os06g0664300	Xylem	1.63293	64	Zm00001d046945	Xylem	0.818174	89
OG0001099	Os01g0631100	Xylem	1.57218	66	Zm00001d039144	Xylem	0.676445	176
OG0011876	Os09g0480100	Xylem	1.50401	71	Zm00001d020869	Xylem	1.05898	45
OG0006150	Os01g0896200	Xylem	1.4667	73	Zm00001d012167	Xylem	1.29373	23
OG0001320	Os03g0301800	Xylem	1.41184	78	Zm00001d028830	Xylem	0.82057	88
OG0008357	Os02g0628200	Xylem	1.31154	87	Zm00001d017282	Xylem	0.715923	143
OG0001099	Os05g0582100	Xylem	1.20659	101	Zm00001d039144	Xylem	0.676445	176
OG0000202	Os03g0412300	Xylem	1.20593	102	Zm00001d029499	Xylem	0.944639	56
OG0003416	Os07g0645000	Xylem	1.1853	105	Zm00001d007045	Xylem	0.895322	65
OG0000774	Os08g0524200	Xylem	1.17683	106	Zm00001d028167	Xylem	0.881715	70
OG0016734	Os08g0432800	Xylem	1.14499	109	Zm00001d050394	Xylem	1.25296	24
OG0004601	Os01g0622700	Xylem	1.11224	116	Zm00001d009707	Xylem	0.776268	110
OG0002453	Os04g0624000	Xylem	1.03186	123	Zm00001d002257	Xylem	0.664428	189
OG0003236	Os04g0683600	Xylem	1.03185	124	Zm00001d002835	Xylem	0.762574	114
OG0001080	Os05g0310500	Xylem	0.955343	139	Zm00001d021615	Xylem	0.915545	61
OG0001431	Os10g0389800	Xylem	0.937253	143	Zm00001d030551	Xylem	0.722265	137
OG0001420	Os09g0525900	Xylem	0.837665	159	Zm00001d052734	Xylem	0.712037	145
OG0000416	Os02g0666200	Xylem	0.811654	163	Zm00001d051403	Xylem	1.08917	38
OG0015697	Os02g0329800	Xylem	0.754523	176	Zm00001d014965	Xylem	1.42464	14
OG0013398	Os01g0571100	Xylem	0.740221	179	Zm00001d011225	Xylem	0.798836	99
OG0000499	Os04g0554500	Cortex	3.52316	2	Zm00001d017508	Cortex	2.06405	1
OG0000499	Os04g0554500	Cortex	3.52316	2	Zm00001d026163	Cortex	1.92558	4
OG0000499	Os04g0554500	Cortex	3.52316	2	Zm00001d026162	Cortex	1.92	6
OG0000499	Os04g0554500	Cortex	3.52316	2	Zm00001d051384	Cortex	0.730556	190
OG0007222	Os10g0552700	Cortex	3.03383	4	Zm00001d029859	Cortex	1.92015	5
OG0007222	Os10g0552800	Cortex	2.90223	5	Zm00001d029859	Cortex	1.92015	5
OG0007222	Os10g0552600	Cortex	2.55772	8	Zm00001d029859	Cortex	1.92015	5
OG0000499	Os02g0662000	Cortex	2.44182	11	Zm00001d017508	Cortex	2.06405	1
OG0000499	Os02g0662000	Cortex	2.44182	11	Zm00001d026163	Cortex	1.92558	4
OG0000499	Os02g0662000	Cortex	2.44182	11	Zm00001d026162	Cortex	1.92	6
OG0000499	Os02g0662000	Cortex	2.44182	11	Zm00001d051384	Cortex	0.730556	190
OG0000499	Os04g0554600	Cortex	2.34678	14	Zm00001d017508	Cortex	2.06405	1
OG0000499	Os04g0554600	Cortex	2.34678	14	Zm00001d026163	Cortex	1.92558	4
OG0000499	Os04g0554600	Cortex	2.34678	14	Zm00001d026162	Cortex	1.92	6
OG0000499	Os04g0554600	Cortex	2.34678	14	Zm00001d051384	Cortex	0.730556	190
OG0001267	Os10g0551800	Cortex	2.33473	15	Zm00001d047117	Cortex	1.9604	2
OG0001267	Os10g0551800	Cortex	2.33473	15	Zm00001d047114	Cortex	1.81388	7
OG0001267	Os10g0551800	Cortex	2.33473	15	Zm00001d047113	Cortex	1.30071	21
OG0001267	Os10g0551800	Cortex	2.33473	15	Zm00001d047116	Cortex	0.743089	178
OG0000842	Os05g0171900	Cortex	1.9132	22	Zm00001d037637	Cortex	1.3252	17
OG0001221	Os03g0135700	Cortex	1.76721	28	Zm00001d027546	Cortex	0.719609	198
OG0000101	Os05g0413200	Cortex	1.64251	33	Zm00001d033457	Cortex	1.26392	28
OG0009986	Os05g0461600	Cortex	1.61516	35	Zm00001d010540	Cortex	0.803269	142
OG0002882	Os07g0676900	Cortex	1.38001	49	Zm00001d022458	Cortex	1.14193	37
OG0000101	Os01g0282800	Cortex	1.23372	57	Zm00001d033457	Cortex	1.26392	28
OG0000101	Os03g0661300	Cortex	1.22346	60	Zm00001d033457	Cortex	1.26392	28
OG0009050	Os09g0426500	Cortex	1.22164	61	Zm00001d020556	Cortex	0.815557	134
OG0001348	Os01g0652100	Cortex	1.20812	67	Zm00001d044037	Cortex	1.0416	54
OG0015810	Os02g0759000	Cortex	1.1214	85	Zm00001d052192	Cortex	0.748636	176
OG0001558	Os08g0205900	Cortex	1.10103	89	Zm00001d002326	Cortex	0.844036	115
OG0000292	Os07g0448800	Cortex	1.07653	94	Zm00001d019565	Cortex	1.10266	45
OG0000292	Os07g0448800	Cortex	1.07653	94	Zm00001d017288	Cortex	1.06906	50
OG0004899	Os04g0569900	Cortex	1.04946	100	Zm00001d002630	Cortex	0.932185	81
OG0009060	Os07g0638100	Cortex	1.01084	109	Zm00001d022277	Cortex	0.996913	65
OG0000101	Os01g0805900	Cortex	1.00217	110	Zm00001d033457	Cortex	1.26392	28
OG0000929	Os06g0336200	Cortex	0.93435	133	Zm00001d026177	Cortex	1.31037	19
OG0000929	Os06g0336200	Cortex	0.93435	133	Zm00001d051362	Cortex	1.28827	24
OG0013259	Os02g0131100	Cortex	0.928005	135	Zm00001d015138	Cortex	1.02176	60
OG0000407	Os02g0741700	Cortex	0.916067	139	Zm00001d032324	Cortex	0.899149	93
OG0003732	Os01g0214200	Cortex	0.913945	141	Zm00001d036234	Cortex	1.27595	26
OG0019564	Os02g0602000	Cortex	0.848524	166	Zm00001d051005	Cortex	0.800754	143
OG0000292	Os04g0233400	Cortex	0.79722	189	Zm00001d019565	Cortex	1.10266	45
OG0000292	Os04g0233400	Cortex	0.79722	189	Zm00001d017288	Cortex	1.06906	50
OG0000416	Os02g0666200	Cortex	0.792764	193	Zm00001d002690	Cortex	1.06059	51
OG0000416	Os02g0666200	Cortex	0.792764	193	Zm00001d017526	Cortex	1.00057	64
OG0013471	Os01g0914300	Cortex	3.67484	1	Zm00001d012080	Cortex_like	2.12821	1
OG0000499	Os04g0554500	Cortex	3.52316	2	Zm00001d026163	Cortex_like	1.3962	12
OG0007222	Os10g0552700	Cortex	3.03383	4	Zm00001d029859	Cortex_like	1.22938	35
OG0007222	Os10g0552800	Cortex	2.90223	5	Zm00001d029859	Cortex_like	1.22938	35
OG0007222	Os10g0552600	Cortex	2.55772	8	Zm00001d029859	Cortex_like	1.22938	35
OG0000499	Os02g0662000	Cortex	2.44182	11	Zm00001d026163	Cortex_like	1.3962	12
OG0000499	Os04g0554600	Cortex	2.34678	14	Zm00001d026163	Cortex_like	1.3962	12
OG0001267	Os10g0551800	Cortex	2.33473	15	Zm00001d047116	Cortex_like	1.41443	10
OG0001267	Os10g0551800	Cortex	2.33473	15	Zm00001d047115	Cortex_like	1.31463	20
OG0001267	Os10g0551800	Cortex	2.33473	15	Zm00001d047113	Cortex_like	1.30922	21
OG0001267	Os10g0551800	Cortex	2.33473	15	Zm00001d047117	Cortex_like	1.29045	23
OG0001267	Os10g0551800	Cortex	2.33473	15	Zm00001d047114	Cortex_like	1.27422	28
OG0000045	Os01g0179600	Cortex	2.27621	16	Zm00001d039607	Cortex_like	1.55397	6
OG0005398	Os06g0711900	Cortex	1.9622	21	Zm00001d014758	Cortex_like	1.27824	25
OG0008136	Os03g0708000	Cortex	1.84235	25	Zm00001d033683	Cortex_like	1.55093	7
OG0008136	Os03g0708000	Cortex	1.84235	25	Zm00001d013461	Cortex_like	0.913917	108
OG0001729	Os02g0205200	Cortex	1.80539	26	Zm00001d044455	Cortex_like	1.08588	52
OG0006921	Os04g0640700	Cortex	1.70703	31	Zm00001d026415	Cortex_like	1.02644	71
OG0000101	Os05g0413200	Cortex	1.64251	33	Zm00001d013612	Cortex_like	1.25871	30
OG0000101	Os05g0413200	Cortex	1.64251	33	Zm00001d043158	Cortex_like	0.944609	98
OG0002396	Os04g0228400	Cortex	1.64177	34	Zm00001d025018	Cortex_like	1.2525	31
OG0015621	Os02g0106100	Cortex	1.50163	40	Zm00001d014947	Cortex_like	1.09407	49
OG0001729	Os01g0611000	Cortex	1.41229	44	Zm00001d044455	Cortex_like	1.08588	52
OG0001197	Os02g0229400	Cortex	1.38324	47	Zm00001d016274	Cortex_like	1.01871	75
OG0013471	Os01g0914100	Cortex	1.38075	48	Zm00001d012080	Cortex_like	2.12821	1
OG0001142	Os01g0270300	Cortex	1.34092	51	Zm00001d008266	Cortex_like	0.970274	87
OG0001142	Os01g0270300	Cortex	1.34092	51	Zm00001d040399	Cortex_like	0.864279	125
OG0016402	Os05g0563600	Cortex	1.25352	55	Zm00001d039010	Cortex_like	0.899768	113
OG0016402	Os05g0563600	Cortex	1.25352	55	Zm00001d009567	Cortex_like	0.835753	139
OG0000361	Os06g0678800	Cortex	1.25045	56	Zm00001d014366	Cortex_like	1.02755	70
OG0000101	Os01g0282800	Cortex	1.23372	57	Zm00001d013612	Cortex_like	1.25871	30
OG0000101	Os01g0282800	Cortex	1.23372	57	Zm00001d043158	Cortex_like	0.944609	98
OG0000101	Os03g0661300	Cortex	1.22346	60	Zm00001d013612	Cortex_like	1.25871	30
OG0000101	Os03g0661300	Cortex	1.22346	60	Zm00001d043158	Cortex_like	0.944609	98
OG0001348	Os01g0652100	Cortex	1.20812	67	Zm00001d044037	Cortex_like	0.76345	196
OG0003177	Os11g0525200	Cortex	1.20053	69	Zm00001d023309	Cortex_like	1.02837	68
OG0000254	Os07g0574800	Cortex	1.15462	77	Zm00001d021891	Cortex_like	0.812053	155
OG0000292	Os07g0448800	Cortex	1.07653	94	Zm00001d005421	Cortex_like	0.91147	111
OG0000101	Os01g0805900	Cortex	1.00217	110	Zm00001d013612	Cortex_like	1.25871	30
OG0000101	Os01g0805900	Cortex	1.00217	110	Zm00001d043158	Cortex_like	0.944609	98
OG0008342	Os03g0255100	Cortex	0.999151	111	Zm00001d028474	Cortex_like	1.22545	36
OG0001778	Os01g0222500	Cortex	0.976368	118	Zm00001d011504	Cortex_like	0.918952	105
OG0003007	Os03g0238600	Cortex	0.974418	120	Zm00001d028368	Cortex_like	1.15917	43
OG0003288	Os03g0780800	Cortex	0.96087	121	Zm00001d034319	Cortex_like	1.24218	33
OG0001197	Os10g0539900	Cortex	0.935159	132	Zm00001d016274	Cortex_like	1.01871	75
OG0003849	Os03g0121200	Cortex	0.926657	136	Zm00001d029747	Cortex_like	0.79783	170
OG0008530	Os05g0397300	Cortex	0.901778	145	Zm00001d038126	Cortex_like	0.791601	175
OG0019086	Os01g0656600	Cortex	0.891849	147	Zm00001d044008	Cortex_like	0.86046	126
OG0016120	Os03g0857600	Cortex	0.861841	158	Zm00001d019593	Cortex_like	0.94286	99
OG0003288	Os12g0628400	Cortex	0.852205	163	Zm00001d034319	Cortex_like	1.24218	33
OG0019794	Os03g0178500	Cortex	0.843369	168	Zm00001d027888	Cortex_like	0.761644	199
OG0000509	Os03g0762400	Cortex	0.832246	171	Zm00001d034129	Cortex_like	0.954527	95
OG0003400	Os01g0557500	Cortex	0.825946	175	Zm00001d044533	Cortex_like	0.796006	172
OG0000292	Os04g0233400	Cortex	0.79722	189	Zm00001d005421	Cortex_like	0.91147	111
OG0000499	Os04g0554500	Cortex_like	2.19644	1	Zm00001d017508	Cortex	2.06405	1
OG0000499	Os04g0554500	Cortex_like	2.19644	1	Zm00001d026163	Cortex	1.92558	4
OG0000499	Os04g0554500	Cortex_like	2.19644	1	Zm00001d026162	Cortex	1.92	6
OG0000499	Os04g0554500	Cortex_like	2.19644	1	Zm00001d051384	Cortex	0.730556	190
OG0002882	Os07g0676900	Cortex_like	2.16166	2	Zm00001d022458	Cortex	1.14193	37
OG0000499	Os02g0662000	Cortex_like	2.15974	3	Zm00001d017508	Cortex	2.06405	1
OG0000499	Os02g0662000	Cortex_like	2.15974	3	Zm00001d026163	Cortex	1.92558	4
OG0000499	Os02g0662000	Cortex_like	2.15974	3	Zm00001d026162	Cortex	1.92	6
OG0000499	Os02g0662000	Cortex_like	2.15974	3	Zm00001d051384	Cortex	0.730556	190
OG0000929	Os02g0658100	Cortex_like	2.12873	4	Zm00001d026177	Cortex	1.31037	19
OG0000929	Os02g0658100	Cortex_like	2.12873	4	Zm00001d051362	Cortex	1.28827	24
OG0007222	Os10g0552600	Cortex_like	2.11954	5	Zm00001d029859	Cortex	1.92015	5
OG0001267	Os10g0551800	Cortex_like	2.01413	6	Zm00001d047117	Cortex	1.9604	2
OG0001267	Os10g0551800	Cortex_like	2.01413	6	Zm00001d047114	Cortex	1.81388	7
OG0001267	Os10g0551800	Cortex_like	2.01413	6	Zm00001d047113	Cortex	1.30071	21
OG0001267	Os10g0551800	Cortex_like	2.01413	6	Zm00001d047116	Cortex	0.743089	178
OG0000292	Os04g0233400	Cortex_like	1.83734	8	Zm00001d019565	Cortex	1.10266	45
OG0000292	Os04g0233400	Cortex_like	1.83734	8	Zm00001d017288	Cortex	1.06906	50
OG0007222	Os10g0552800	Cortex_like	1.75259	9	Zm00001d029859	Cortex	1.92015	5
OG0007222	Os10g0552700	Cortex_like	1.7476	10	Zm00001d029859	Cortex	1.92015	5
OG0000499	Os04g0554600	Cortex_like	1.63533	14	Zm00001d017508	Cortex	2.06405	1
OG0000499	Os04g0554600	Cortex_like	1.63533	14	Zm00001d026163	Cortex	1.92558	4
OG0000499	Os04g0554600	Cortex_like	1.63533	14	Zm00001d026162	Cortex	1.92	6
OG0000499	Os04g0554600	Cortex_like	1.63533	14	Zm00001d051384	Cortex	0.730556	190
OG0000292	Os02g0629200	Cortex_like	1.56417	16	Zm00001d019565	Cortex	1.10266	45
OG0000292	Os02g0629200	Cortex_like	1.56417	16	Zm00001d017288	Cortex	1.06906	50
OG0000416	Os02g0666200	Cortex_like	1.55836	17	Zm00001d002690	Cortex	1.06059	51
OG0000416	Os02g0666200	Cortex_like	1.55836	17	Zm00001d017526	Cortex	1.00057	64
OG0000292	Os07g0448800	Cortex_like	1.43474	21	Zm00001d019565	Cortex	1.10266	45
OG0000292	Os07g0448800	Cortex_like	1.43474	21	Zm00001d017288	Cortex	1.06906	50
OG0000101	Os03g0661300	Cortex_like	1.12751	45	Zm00001d033457	Cortex	1.26392	28
OG0000292	Os04g0521100	Cortex_like	1.04195	52	Zm00001d019565	Cortex	1.10266	45
OG0000292	Os04g0521100	Cortex_like	1.04195	52	Zm00001d017288	Cortex	1.06906	50
OG0001448	Os03g0676400	Cortex_like	1.0142	57	Zm00001d033389	Cortex	0.719805	197
OG0013259	Os02g0131100	Cortex_like	0.995715	62	Zm00001d015138	Cortex	1.02176	60
OG0004899	Os04g0569900	Cortex_like	0.98015	66	Zm00001d002630	Cortex	0.932185	81
OG0001900	Os09g0478600	Cortex_like	0.938052	72	Zm00001d005978	Cortex	0.791909	148
OG0000416	Os04g0559700	Cortex_like	0.832438	104	Zm00001d002690	Cortex	1.06059	51
OG0000416	Os04g0559700	Cortex_like	0.832438	104	Zm00001d017526	Cortex	1.00057	64
OG0000407	Os02g0741700	Cortex_like	0.797011	112	Zm00001d032324	Cortex	0.899149	93
OG0015619	Os01g0975000	Cortex_like	0.795944	113	Zm00001d010385	Cortex	0.865615	104
OG0015959	Os03g0345700	Cortex_like	0.765169	127	Zm00001d047492	Cortex	0.853333	109
OG0009050	Os09g0426500	Cortex_like	0.756488	130	Zm00001d020556	Cortex	0.815557	134
OG0001221	Os03g0135700	Cortex_like	0.741883	137	Zm00001d027546	Cortex	0.719609	198
OG0014013	Os10g0109300	Cortex_like	0.736008	144	Zm00001d030199	Cortex	1.26796	27
OG0003979	Os01g0884300	Cortex_like	0.707414	155	Zm00001d038221	Cortex	0.761366	165
OG0001267	Os10g0552200	Cortex_like	0.675613	168	Zm00001d047117	Cortex	1.9604	2
OG0001267	Os10g0552200	Cortex_like	0.675613	168	Zm00001d047114	Cortex	1.81388	7
OG0001267	Os10g0552200	Cortex_like	0.675613	168	Zm00001d047113	Cortex	1.30071	21
OG0001267	Os10g0552200	Cortex_like	0.675613	168	Zm00001d047116	Cortex	0.743089	178
OG0015810	Os02g0759000	Cortex_like	0.643236	191	Zm00001d052192	Cortex	0.748636	176
OG0001348	Os01g0652100	Cortex_like	0.630885	200	Zm00001d044037	Cortex	1.0416	54
OG0010085	Os03g0288000	Trichoblast2	5.0847	1	Zm00001d048611	Phloem	1.05976	28
OG0000532	Os02g0543000	Trichoblast2	4.38338	5	Zm00001d040786	Phloem	1.62491	2
OG0000532	Os02g0543000	Trichoblast2	4.38338	5	Zm00001d040787	Phloem	1.47622	5
OG0000532	Os02g0543000	Trichoblast2	4.38338	5	Zm00001d016760	Phloem	1.31926	11
OG0000532	Os02g0543000	Trichoblast2	4.38338	5	Zm00001d025401	Phloem	0.938746	53
OG0000307	Os10g0530200	Trichoblast2	3.99207	7	Zm00001d029699	Phloem	0.713209	170
OG0002352	Os02g0208500	Trichoblast2	3.17998	14	Zm00001d036136	Phloem	1.00829	41
OG0002032	Os03g0331700	Trichoblast2	2.24421	38	Zm00001d022430	Phloem	0.787656	118
OG0000619	Os01g0627500	Trichoblast2	1.90477	54	Zm00001d044156	Phloem	0.905215	65
OG0001438	Os01g0803200	Trichoblast2	1.72561	69	Zm00001d038558	Phloem	0.991253	46
OG0005984	Os06g0319133	Trichoblast2	1.65423	75	Zm00001d045888	Phloem	0.819622	102
OG0010085	Os11g0704500	Trichoblast2	1.56696	79	Zm00001d048611	Phloem	1.05976	28
OG0016250	Os04g0569300	Trichoblast2	1.52087	84	Zm00001d002632	Phloem	0.999922	44
OG0016540	Os06g0717900	Trichoblast2	1.32211	106	Zm00001d014804	Phloem	0.702295	183
OG0001509	Os01g0835500	Trichoblast2	1.26743	116	Zm00001d042961	Phloem	0.698691	191
OG0016671	Os07g0683900	Trichoblast2	1.1336	141	Zm00001d022421	Phloem	0.698739	190
OG0000907	Os04g0533300	Trichoblast2	1.13201	142	Zm00001d017386	Phloem	0.882785	76
OG0000907	Os04g0533300	Trichoblast2	1.13201	142	Zm00001d002842	Phloem	0.768112	131
OG0002453	Os07g0512200	Trichoblast2	1.02589	170	Zm00001d002257	Phloem	0.790868	115
OG0002453	Os07g0512200	Trichoblast2	1.02589	170	Zm00001d049405	Phloem	0.726417	160
OG0000927	Os07g0176500	Trichoblast2	0.945839	192	Zm00001d034427	Phloem	0.924825	61
OG0000682	Os02g0173800	Trichoblast2	0.900624	200	Zm00001d015401	Phloem	0.716867	166
OG0002877	Os10g0454200	Atrichoblast	2.83104	2	Zm00001d038382	Epidermis	1.46163	48
OG0010092	Os07g0639000	Atrichoblast	2.49719	8	Zm00001d006933	Epidermis	1.78963	21
OG0015640	Os02g0157600	Atrichoblast	2.30934	12	Zm00001d053862	Epidermis	1.82799	17
OG0001289	Os01g0284500	Atrichoblast	1.62893	40	Zm00001d008210	Epidermis	0.977284	162
OG0019294	Os01g0937050	Atrichoblast	1.53876	50	Zm00001d042179	Epidermis	2.12939	6
OG0009986	Os01g0838200	Atrichoblast	1.41647	61	Zm00001d042936	Epidermis	0.929455	196
OG0001930	Os08g0524400	Atrichoblast	1.31357	70	Zm00001d021017	Epidermis	1.43626	51
OG0016114	Os03g0838400	Atrichoblast	1.21112	85	Zm00001d034782	Epidermis	1.13309	104
OG0001930	Os09g0501100	Atrichoblast	1.17101	89	Zm00001d021017	Epidermis	1.43626	51
OG0007115	Os02g0690600	Atrichoblast	1.05092	115	Zm00001d017671	Epidermis	0.995266	155
OG0000115	Os01g0949900	Atrichoblast	1.00691	123	Zm00001d042102	Epidermis	1.12775	107
OG0001440	Os03g0833100	Atrichoblast	0.959999	133	Zm00001d034731	Epidermis	1.1431	100
OG0021191	Os08g0245200	Atrichoblast	0.955265	136	Zm00001d050224	Epidermis	1.11083	114
OG0004690	Os04g0583500	Atrichoblast	0.954837	137	Zm00001d026014	Epidermis	1.28721	69
OG0004690	Os04g0583500	Atrichoblast	0.954837	137	Zm00001d002548	Epidermis	1.25694	74
OG0000115	Os01g0949750	Atrichoblast	0.863691	166	Zm00001d042102	Epidermis	1.12775	107
OG0010632	Os03g0734300	Atrichoblast	0.860872	167	Zm00001d040245	Epidermis	1.1853	93
OG0018807	Os01g0118400	Atrichoblast	0.847466	171	Zm00001d040075	Epidermis	1.02875	144
OG0020420	Os05g0135200	Atrichoblast	0.817873	182	Zm00001d010924	Epidermis	1.31677	61
OG0019974	Os03g0563600	Atrichoblast	0.809234	184	Zm00001d032405	Epidermis	1.45523	49
OG0016285	Os04g0652700	Atrichoblast	0.799007	185	Zm00001d002035	Epidermis	0.964688	168
OG0003629	Os02g0717600	Atrichoblast	0.787114	191	Zm00001d017849	Epidermis	1.05718	131
OG0009937	Os01g0342900	Atrichoblast	0.768238	199	Zm00001d015025	Epidermis	0.935751	189
OG0000498	Os08g0127100	Atrichoblast	2.60454	7	Zm00001d035157	Stele1	0.854188	83
OG0000498	Os08g0127100	Atrichoblast	2.60454	7	Zm00001d002176	Stele1	0.702691	164
OG0000250	Os03g0830200	Atrichoblast	1.76562	33	Zm00001d050899	Stele1	0.996015	38
OG0000250	Os03g0830200	Atrichoblast	1.76562	33	Zm00001d012899	Stele1	0.83177	97
OG0000250	Os03g0830200	Atrichoblast	1.76562	33	Zm00001d012900	Stele1	0.802352	107
OG0001438	Os01g0803200	Atrichoblast	1.42911	58	Zm00001d038558	Stele1	0.698433	170
OG0020767	Os06g0470000	Atrichoblast	1.24802	78	Zm00001d046004	Stele1	0.697899	171
OG0000178	Os01g0557100	Atrichoblast	1.22563	83	Zm00001d012603	Stele1	1.01239	34
OG0010085	Os11g0704500	Atrichoblast	1.16271	92	Zm00001d048611	Stele1	0.904424	65
OG0002769	Os06g0103200	Atrichoblast	1.09011	108	Zm00001d035865	Stele1	0.72629	147
OG0000115	Os01g0949900	Atrichoblast	1.00691	123	Zm00001d018220	Stele1	0.80342	106
OG0000115	Os01g0949900	Atrichoblast	1.00691	123	Zm00001d042099	Stele1	0.787327	118
OG0005272	Os10g0416100	Atrichoblast	0.986576	128	Zm00001d032947	Stele1	1.1914	10
OG0000927	Os03g0795300	Atrichoblast	0.952266	139	Zm00001d034427	Stele1	0.926155	58
OG0000927	Os03g0795300	Atrichoblast	0.952266	139	Zm00001d013080	Stele1	0.840741	90
OG0008853	Os08g0526400	Atrichoblast	0.943594	142	Zm00001d031580	Stele1	0.746877	136
OG0019275	Os01g0920500	Atrichoblast	0.925814	146	Zm00001d042337	Stele1	1.01084	35
OG0010134	Os12g0630500	Atrichoblast	0.920161	147	Zm00001d043121	Stele1	0.667598	199
OG0001138	Os02g0605900	Atrichoblast	0.912266	149	Zm00001d003190	Stele1	0.814813	102
OG0000115	Os01g0949750	Atrichoblast	0.863691	166	Zm00001d018220	Stele1	0.80342	106
OG0000115	Os01g0949750	Atrichoblast	0.863691	166	Zm00001d042099	Stele1	0.787327	118
OG0021910	Os12g0603800	Atrichoblast	0.776211	195	Zm00001d041430	Stele1	1.07415	26
OG0001423	Os05g0552300	Endodermis	2.00239	11	Zm00001d038923	Endodermal_Initials	0.882726	134
OG0004105	Os09g0258600	Endodermis	1.91846	17	Zm00001d037732	Endodermal_Initials	1.0905	35
OG0004105	Os09g0258600	Endodermis	1.91846	17	Zm00001d049815	Endodermal_Initials	0.848439	149
OG0001792	Os07g0208000	Endodermis	1.91131	19	Zm00001d009000	Endodermal_Initials	1.03099	54
OG0002512	Os12g0567700	Endodermis	1.90062	20	Zm00001d041568	Endodermal_Initials	0.846588	152
OG0001982	Os10g0564300	Endodermis	1.88998	21	Zm00001d036570	Endodermal_Initials	1.00116	61
OG0003292	Os01g0100700	Endodermis	1.84955	26	Zm00001d037929	Endodermal_Initials	0.93774	91
OG0000930	Os04g0613600	Endodermis	1.81282	30	Zm00001d026286	Endodermal_Initials	0.825582	170
OG0000930	Os04g0613600	Endodermis	1.81282	30	Zm00001d002339	Endodermal_Initials	0.783442	198
OG0000930	Os07g0565100	Endodermis	1.79417	31	Zm00001d026286	Endodermal_Initials	0.825582	170
OG0000930	Os07g0565100	Endodermis	1.79417	31	Zm00001d002339	Endodermal_Initials	0.783442	198
OG0011587	Os02g0618250	Endodermis	1.78153	33	Zm00001d017242	Endodermal_Initials	0.836666	160
OG0002811	Os03g0154700	Endodermis	1.77047	36	Zm00001d047186	Endodermal_Initials	1.31737	7
OG0001567	Os03g0598800	Endodermis	1.75334	40	Zm00001d006388	Endodermal_Initials	0.886042	130
OG0001567	Os03g0598800	Endodermis	1.75334	40	Zm00001d021511	Endodermal_Initials	0.862347	143
OG0002614	Os05g0155100	Endodermis	1.71161	44	Zm00001d009848	Endodermal_Initials	0.891105	124
OG0006226	Os02g0478700	Endodermis	1.71033	45	Zm00001d016491	Endodermal_Initials	1.0816	37
OG0001185	Os07g0523700	Endodermis	1.68394	51	Zm00001d021652	Endodermal_Initials	0.876742	137
OG0004492	Os07g0608700	Endodermis	1.67665	53	Zm00001d047271	Endodermal_Initials	1.08053	39
OG0000905	Os04g0598200	Endodermis	1.67177	54	Zm00001d051543	Endodermal_Initials	1.07871	40
OG0000905	Os04g0598200	Endodermis	1.67177	54	Zm00001d002450	Endodermal_Initials	0.811857	178
OG0001301	Os07g0229900	Endodermis	1.66513	57	Zm00001d039106	Endodermal_Initials	1.00177	60
OG0001792	Os02g0478600	Endodermis	1.66326	58	Zm00001d009000	Endodermal_Initials	1.03099	54
OG0002550	Os02g0622300	Endodermis	1.66267	59	Zm00001d006287	Endodermal_Initials	1.01282	58
OG0001454	Os08g0326400	Endodermis	1.66061	61	Zm00001d031640	Endodermal_Initials	1.34391	6
OG0001454	Os08g0326400	Endodermis	1.66061	61	Zm00001d006100	Endodermal_Initials	0.947416	87
OG0002099	Os04g0349500	Endodermis	1.66008	62	Zm00001d053632	Endodermal_Initials	1.15683	23
OG0002099	Os04g0349500	Endodermis	1.66008	62	Zm00001d053636	Endodermal_Initials	0.970754	75
OG0000821	Os03g0109600	Endodermis	1.64713	64	Zm00001d034855	Endodermal_Initials	1.04177	49
OG0000627	Os01g0723200	Endodermis	1.63714	66	Zm00001d011741	Endodermal_Initials	0.984211	67
OG0000832	Os03g0139100	Endodermis	1.62716	70	Zm00001d048368	Endodermal_Initials	1.09248	34
OG0000832	Os03g0139100	Endodermis	1.62716	70	Zm00001d051929	Endodermal_Initials	0.940746	88
OG0002565	Os02g0534800	Endodermis	1.60991	73	Zm00001d000120	Endodermal_Initials	1.09858	33
OG0002565	Os02g0534800	Endodermis	1.60991	73	Zm00001d036568	Endodermal_Initials	1.0756	42
OG0000924	Os08g0234000	Endodermis	1.60479	74	Zm00001d026254	Endodermal_Initials	0.960674	79
OG0000932	Os03g0200500	Endodermis	1.58805	78	Zm00001d048159	Endodermal_Initials	0.853925	148
OG0004675	Os10g0411700	Endodermis	1.58195	79	Zm00001d047697	Endodermal_Initials	0.872016	139
OG0001806	Os02g0111700	Endodermis	1.5738	81	Zm00001d054065	Endodermal_Initials	0.899449	116
OG0001454	Os09g0507800	Endodermis	1.57293	82	Zm00001d031640	Endodermal_Initials	1.34391	6
OG0001454	Os09g0507800	Endodermis	1.57293	82	Zm00001d006100	Endodermal_Initials	0.947416	87
OG0002565	Os02g0162500	Endodermis	1.56977	83	Zm00001d000120	Endodermal_Initials	1.09858	33
OG0002565	Os02g0162500	Endodermis	1.56977	83	Zm00001d036568	Endodermal_Initials	1.0756	42
OG0002550	Os04g0515300	Endodermis	1.56735	85	Zm00001d006287	Endodermal_Initials	1.01282	58
OG0000930	Os07g0565000	Endodermis	1.56709	86	Zm00001d026286	Endodermal_Initials	0.825582	170
OG0000930	Os07g0565000	Endodermis	1.56709	86	Zm00001d002339	Endodermal_Initials	0.783442	198
OG0001328	Os08g0156800	Endodermis	1.56597	87	Zm00001d032181	Endodermal_Initials	1.3511	5
OG0001208	Os01g0962600	Endodermis	1.56518	89	Zm00001d003672	Endodermal_Initials	0.928534	99
OG0001208	Os01g0962600	Endodermis	1.56518	89	Zm00001d025413	Endodermal_Initials	0.782626	199
OG0001378	Os03g0182600	Endodermis	1.55108	92	Zm00001d048253	Endodermal_Initials	1.12188	28
OG0001378	Os03g0182600	Endodermis	1.55108	92	Zm00001d006871	Endodermal_Initials	1.08302	36
OG0001378	Os03g0182600	Endodermis	1.55108	92	Zm00001d027527	Endodermal_Initials	0.9952	64
OG0003432	Os03g0249400	Endodermis	1.549	94	Zm00001d028426	Endodermal_Initials	0.79646	185
OG0001045	Os03g0807800	Endodermis	1.5487	95	Zm00001d034550	Endodermal_Initials	0.978415	73
OG0001374	Os04g0473400	Endodermis	1.54715	96	Zm00001d050921	Endodermal_Initials	0.996767	63
OG0001374	Os04g0473400	Endodermis	1.54715	96	Zm00001d017047	Endodermal_Initials	0.934928	95
OG0001374	Os04g0473400	Endodermis	1.54715	96	Zm00001d050920	Endodermal_Initials	0.800778	183
OG0001912	Os06g0172600	Endodermis	1.54145	98	Zm00001d018410	Endodermal_Initials	1.14695	24
OG0003476	Os01g0679700	Endodermis	1.53859	99	Zm00001d009509	Endodermal_Initials	1.11675	29
OG0000821	Os03g0851000	Endodermis	1.53774	100	Zm00001d034855	Endodermal_Initials	1.04177	49
OG0001732	Os05g0565000	Endodermis	1.53039	102	Zm00001d009579	Endodermal_Initials	0.950512	84
OG0002811	Os11g0602600	Endodermis	1.52129	103	Zm00001d047186	Endodermal_Initials	1.31737	7
OG0000924	Os04g0605900	Endodermis	1.51533	105	Zm00001d026254	Endodermal_Initials	0.960674	79
OG0000746	Os05g0207300	Endodermis	1.51452	106	Zm00001d010016	Endodermal_Initials	1.18974	18
OG0000746	Os05g0207300	Endodermis	1.51452	106	Zm00001d046317	Endodermal_Initials	1.03817	51
OG0000746	Os05g0207300	Endodermis	1.51452	106	Zm00001d053547	Endodermal_Initials	0.891625	122
OG0001982	Os02g0284600	Endodermis	1.51155	108	Zm00001d036570	Endodermal_Initials	1.00116	61
OG0001158	Os03g0345200	Endodermis	1.51009	109	Zm00001d029124	Endodermal_Initials	1.22277	12
OG0001531	Os07g0180900	Endodermis	1.50988	110	Zm00001d018957	Endodermal_Initials	0.832143	165
OG0001531	Os07g0180900	Endodermis	1.50988	110	Zm00001d007824	Endodermal_Initials	0.826097	169
OG0001290	Os03g0141000	Endodermis	1.50955	111	Zm00001d014082	Endodermal_Initials	1.08139	38
OG0001290	Os03g0141000	Endodermis	1.50955	111	Zm00001d027618	Endodermal_Initials	0.854773	147
OG0001290	Os03g0141000	Endodermis	1.50955	111	Zm00001d032760	Endodermal_Initials	0.799826	184
OG0000832	Os10g0466700	Endodermis	1.50721	112	Zm00001d048368	Endodermal_Initials	1.09248	34
OG0000832	Os10g0466700	Endodermis	1.50721	112	Zm00001d051929	Endodermal_Initials	0.940746	88
OG0002207	Os07g0641700	Endodermis	1.5062	113	Zm00001d029263	Endodermal_Initials	1.0269	55
OG0002207	Os07g0641700	Endodermis	1.5062	113	Zm00001d007031	Endodermal_Initials	0.978979	72
OG0002207	Os07g0641700	Endodermis	1.5062	113	Zm00001d022307	Endodermal_Initials	0.91941	104
OG0002481	Os05g0477300	Endodermis	1.5016	114	Zm00001d012992	Endodermal_Initials	0.985686	66
OG0001061	Os11g0168200	Endodermis	1.49933	115	Zm00001d004839	Endodermal_Initials	1.1911	17
OG0001061	Os11g0168200	Endodermis	1.49933	115	Zm00001d004841	Endodermal_Initials	0.921238	101
OG0001061	Os11g0168200	Endodermis	1.49933	115	Zm00001d003680	Endodermal_Initials	0.862008	144
OG0001061	Os11g0168200	Endodermis	1.49933	115	Zm00001d003683	Endodermal_Initials	0.833583	164
OG0000905	Os02g0699600	Endodermis	1.49045	119	Zm00001d051543	Endodermal_Initials	1.07871	40
OG0000905	Os02g0699600	Endodermis	1.49045	119	Zm00001d002450	Endodermal_Initials	0.811857	178
OG0002207	Os03g0366000	Endodermis	1.48977	120	Zm00001d029263	Endodermal_Initials	1.0269	55
OG0002207	Os03g0366000	Endodermis	1.48977	120	Zm00001d007031	Endodermal_Initials	0.978979	72
OG0002207	Os03g0366000	Endodermis	1.48977	120	Zm00001d022307	Endodermal_Initials	0.91941	104
OG0001863	Os01g0348700	Endodermis	1.48305	122	Zm00001d003127	Endodermal_Initials	0.907304	109
OG0001863	Os01g0348700	Endodermis	1.48305	122	Zm00001d025784	Endodermal_Initials	0.897394	119
OG0000932	Os02g0287000	Endodermis	1.47398	123	Zm00001d048159	Endodermal_Initials	0.853925	148
OG0003151	Os03g0297100	Endodermis	1.47107	125	Zm00001d047707	Endodermal_Initials	0.920991	102
OG0000832	Os02g0814700	Endodermis	1.46297	126	Zm00001d048368	Endodermal_Initials	1.09248	34
OG0000832	Os02g0814700	Endodermis	1.46297	126	Zm00001d051929	Endodermal_Initials	0.940746	88
OG0001956	Os11g0634500	Endodermis	1.45707	127	Zm00001d041727	Endodermal_Initials	0.979477	71
OG0001956	Os12g0508300	Endodermis	1.45689	128	Zm00001d041727	Endodermal_Initials	0.979477	71
OG0001531	Os03g0796501	Endodermis	1.4437	130	Zm00001d018957	Endodermal_Initials	0.832143	165
OG0001531	Os03g0796501	Endodermis	1.4437	130	Zm00001d007824	Endodermal_Initials	0.826097	169
OG0001445	Os03g0577000	Endodermis	1.44243	131	Zm00001d022111	Endodermal_Initials	0.981172	69
OG0001445	Os03g0577000	Endodermis	1.44243	131	Zm00001d024511	Endodermal_Initials	0.96165	78
OG0001301	Os07g0150200	Endodermis	1.44069	132	Zm00001d039106	Endodermal_Initials	1.00177	60
OG0001732	Os01g0752300	Endodermis	1.43742	133	Zm00001d009579	Endodermal_Initials	0.950512	84
OG0003292	Os11g0482000	Endodermis	1.43376	134	Zm00001d037929	Endodermal_Initials	0.93774	91
OG0000377	Os01g0191100	Endodermis	1.4307	135	Zm00001d009652	Endodermal_Initials	1.05	46
OG0000377	Os01g0191100	Endodermis	1.4307	135	Zm00001d009657	Endodermal_Initials	0.962809	77
OG0000377	Os01g0191100	Endodermis	1.4307	135	Zm00001d001899	Endodermal_Initials	0.948023	86
OG0000377	Os01g0191100	Endodermis	1.4307	135	Zm00001d009653	Endodermal_Initials	0.820033	173
OG0003604	Os09g0501200	Endodermis	1.42692	137	Zm00001d006064	Endodermal_Initials	1.16714	21
OG0003604	Os09g0501200	Endodermis	1.42692	137	Zm00001d021020	Endodermal_Initials	0.837848	158
OG0001017	Os02g0785800	Endodermis	1.42155	138	Zm00001d052075	Endodermal_Initials	1.10541	31
OG0001717	Os03g0337800	Endodermis	1.42131	139	Zm00001d045069	Endodermal_Initials	1.20961	14
OG0003432	Os10g0170200	Endodermis	1.41752	141	Zm00001d028426	Endodermal_Initials	0.79646	185
OG0001328	Os08g0436800	Endodermis	1.41745	142	Zm00001d032181	Endodermal_Initials	1.3511	5
OG0001208	Os04g0430100	Endodermis	1.40563	146	Zm00001d003672	Endodermal_Initials	0.928534	99
OG0001208	Os04g0430100	Endodermis	1.40563	146	Zm00001d025413	Endodermal_Initials	0.782626	199
OG0001061	Os12g0167900	Endodermis	1.40252	148	Zm00001d004839	Endodermal_Initials	1.1911	17
OG0001061	Os12g0167900	Endodermis	1.40252	148	Zm00001d004841	Endodermal_Initials	0.921238	101
OG0001061	Os12g0167900	Endodermis	1.40252	148	Zm00001d003680	Endodermal_Initials	0.862008	144
OG0001061	Os12g0167900	Endodermis	1.40252	148	Zm00001d003683	Endodermal_Initials	0.833583	164
OG0001017	Os05g0556900	Endodermis	1.40026	149	Zm00001d052075	Endodermal_Initials	1.10541	31
OG0003476	Os05g0557000	Endodermis	1.39876	151	Zm00001d009509	Endodermal_Initials	1.11675	29
OG0000627	Os02g0229000	Endodermis	1.39297	152	Zm00001d011741	Endodermal_Initials	0.984211	67
OG0002614	Os03g0341100	Endodermis	1.38379	155	Zm00001d009848	Endodermal_Initials	0.891105	124
OG0003151	Os05g0346300	Endodermis	1.38285	156	Zm00001d047707	Endodermal_Initials	0.920991	102
OG0001127	Os08g0130500	Endodermis	1.37387	157	Zm00001d049619	Endodermal_Initials	1.02486	57
OG0001127	Os08g0130500	Endodermis	1.37387	157	Zm00001d035201	Endodermal_Initials	0.888347	128
OG0002481	Os01g0823300	Endodermis	1.36816	159	Zm00001d012992	Endodermal_Initials	0.985686	66
OG0001423	Os01g0686800	Endodermis	1.35927	162	Zm00001d038923	Endodermal_Initials	0.882726	134
OG0000932	Os12g0406200	Endodermis	1.35057	163	Zm00001d048159	Endodermal_Initials	0.853925	148
OG0000627	Os06g0555400	Endodermis	1.3449	164	Zm00001d011741	Endodermal_Initials	0.984211	67
OG0004938	Os06g0181566	Endodermis	1.3375	165	Zm00001d045121	Endodermal_Initials	0.929255	98
OG0004938	Os02g0797200	Endodermis	1.31894	172	Zm00001d045121	Endodermal_Initials	0.929255	98
OG0000377	Os05g0445500	Endodermis	1.31591	173	Zm00001d009652	Endodermal_Initials	1.05	46
OG0000377	Os05g0445500	Endodermis	1.31591	173	Zm00001d009657	Endodermal_Initials	0.962809	77
OG0000377	Os05g0445500	Endodermis	1.31591	173	Zm00001d001899	Endodermal_Initials	0.948023	86
OG0000377	Os05g0445500	Endodermis	1.31591	173	Zm00001d009653	Endodermal_Initials	0.820033	173
OG0002565	Os04g0413600	Endodermis	1.31332	174	Zm00001d000120	Endodermal_Initials	1.09858	33
OG0002565	Os04g0413600	Endodermis	1.31332	174	Zm00001d036568	Endodermal_Initials	1.0756	42
OG0001806	Os08g0128500	Endodermis	1.28669	183	Zm00001d054065	Endodermal_Initials	0.899449	116
OG0001374	Os02g0591700	Endodermis	1.26645	187	Zm00001d050921	Endodermal_Initials	0.996767	63
OG0001374	Os02g0591700	Endodermis	1.26645	187	Zm00001d017047	Endodermal_Initials	0.934928	95
OG0001374	Os02g0591700	Endodermis	1.26645	187	Zm00001d050920	Endodermal_Initials	0.800778	183
OG0001863	Os04g0501000	Endodermis	1.24731	191	Zm00001d003127	Endodermal_Initials	0.907304	109
OG0001863	Os04g0501000	Endodermis	1.24731	191	Zm00001d025784	Endodermal_Initials	0.897394	119
OG0000746	Os02g0235600	Endodermis	1.22512	198	Zm00001d010016	Endodermal_Initials	1.18974	18
OG0000746	Os02g0235600	Endodermis	1.22512	198	Zm00001d046317	Endodermal_Initials	1.03817	51
OG0000746	Os02g0235600	Endodermis	1.22512	198	Zm00001d053547	Endodermal_Initials	0.891625	122
OG0001185	Os07g0450000	Endodermis	1.22424	199	Zm00001d021652	Endodermal_Initials	0.876742	137
OG0000746	Os01g0205500	Endodermis	1.22252	200	Zm00001d010016	Endodermal_Initials	1.18974	18
OG0000746	Os01g0205500	Endodermis	1.22252	200	Zm00001d046317	Endodermal_Initials	1.03817	51
OG0000746	Os01g0205500	Endodermis	1.22252	200	Zm00001d053547	Endodermal_Initials	0.891625	122
OG0000832	Os03g0139100	Meristem	1.66476	6	Zm00001d048368	Endodermal_Initials	1.09248	34
OG0000832	Os03g0139100	Meristem	1.66476	6	Zm00001d051929	Endodermal_Initials	0.940746	88
OG0000627	Os01g0723200	Meristem	1.62206	12	Zm00001d011741	Endodermal_Initials	0.984211	67
OG0001567	Os03g0598800	Meristem	1.61668	14	Zm00001d006388	Endodermal_Initials	0.886042	130
OG0001567	Os03g0598800	Meristem	1.61668	14	Zm00001d021511	Endodermal_Initials	0.862347	143
OG0002614	Os05g0155100	Meristem	1.59781	15	Zm00001d009848	Endodermal_Initials	0.891105	124
OG0006226	Os02g0478700	Meristem	1.59572	16	Zm00001d016491	Endodermal_Initials	1.0816	37
OG0001982	Os10g0564300	Meristem	1.58167	20	Zm00001d036570	Endodermal_Initials	1.00116	61
OG0002512	Os12g0567700	Meristem	1.54647	23	Zm00001d041568	Endodermal_Initials	0.846588	152
OG0002550	Os02g0622300	Meristem	1.52604	24	Zm00001d006287	Endodermal_Initials	1.01282	58
OG0004105	Os09g0258600	Meristem	1.51969	25	Zm00001d037732	Endodermal_Initials	1.0905	35
OG0004105	Os09g0258600	Meristem	1.51969	25	Zm00001d049815	Endodermal_Initials	0.848439	149
OG0000930	Os07g0565100	Meristem	1.51242	27	Zm00001d026286	Endodermal_Initials	0.825582	170
OG0000930	Os07g0565100	Meristem	1.51242	27	Zm00001d002339	Endodermal_Initials	0.783442	198
OG0001301	Os07g0229900	Meristem	1.51185	28	Zm00001d039106	Endodermal_Initials	1.00177	60
OG0000377	Os01g0191100	Meristem	1.5116	29	Zm00001d009652	Endodermal_Initials	1.05	46
OG0000377	Os01g0191100	Meristem	1.5116	29	Zm00001d009657	Endodermal_Initials	0.962809	77
OG0000377	Os01g0191100	Meristem	1.5116	29	Zm00001d001899	Endodermal_Initials	0.948023	86
OG0000377	Os01g0191100	Meristem	1.5116	29	Zm00001d009653	Endodermal_Initials	0.820033	173
OG0002811	Os03g0154700	Meristem	1.51123	30	Zm00001d047186	Endodermal_Initials	1.31737	7
OG0003292	Os01g0100700	Meristem	1.4998	32	Zm00001d037929	Endodermal_Initials	0.93774	91
OG0004410	Os01g0914000	Meristem	1.49193	34	Zm00001d042386	Endodermal_Initials	0.936866	92
OG0011587	Os02g0618250	Meristem	1.48589	35	Zm00001d017242	Endodermal_Initials	0.836666	160
OG0001290	Os03g0141000	Meristem	1.47289	37	Zm00001d014082	Endodermal_Initials	1.08139	38
OG0001290	Os03g0141000	Meristem	1.47289	37	Zm00001d027618	Endodermal_Initials	0.854773	147
OG0001290	Os03g0141000	Meristem	1.47289	37	Zm00001d032760	Endodermal_Initials	0.799826	184
OG0001454	Os08g0326400	Meristem	1.47218	38	Zm00001d031640	Endodermal_Initials	1.34391	6
OG0001454	Os08g0326400	Meristem	1.47218	38	Zm00001d006100	Endodermal_Initials	0.947416	87
OG0001454	Os09g0507800	Meristem	1.47025	39	Zm00001d031640	Endodermal_Initials	1.34391	6
OG0001454	Os09g0507800	Meristem	1.47025	39	Zm00001d006100	Endodermal_Initials	0.947416	87
OG0000932	Os03g0200500	Meristem	1.45908	41	Zm00001d048159	Endodermal_Initials	0.853925	148
OG0000924	Os08g0234000	Meristem	1.45319	43	Zm00001d026254	Endodermal_Initials	0.960674	79
OG0001717	Os03g0337800	Meristem	1.45312	44	Zm00001d045069	Endodermal_Initials	1.20961	14
OG0001792	Os07g0208000	Meristem	1.45244	45	Zm00001d009000	Endodermal_Initials	1.03099	54
OG0001045	Os03g0807800	Meristem	1.44867	46	Zm00001d034550	Endodermal_Initials	0.978415	73
OG0001061	Os11g0168200	Meristem	1.42853	50	Zm00001d004839	Endodermal_Initials	1.1911	17
OG0001061	Os11g0168200	Meristem	1.42853	50	Zm00001d004841	Endodermal_Initials	0.921238	101
OG0001061	Os11g0168200	Meristem	1.42853	50	Zm00001d003680	Endodermal_Initials	0.862008	144
OG0001061	Os11g0168200	Meristem	1.42853	50	Zm00001d003683	Endodermal_Initials	0.833583	164
OG0000832	Os02g0814700	Meristem	1.42509	51	Zm00001d048368	Endodermal_Initials	1.09248	34
OG0000832	Os02g0814700	Meristem	1.42509	51	Zm00001d051929	Endodermal_Initials	0.940746	88
OG0001445	Os03g0577000	Meristem	1.42445	52	Zm00001d022111	Endodermal_Initials	0.981172	69
OG0001445	Os03g0577000	Meristem	1.42445	52	Zm00001d024511	Endodermal_Initials	0.96165	78
OG0002099	Os04g0349500	Meristem	1.42347	54	Zm00001d053632	Endodermal_Initials	1.15683	23
OG0002099	Os04g0349500	Meristem	1.42347	54	Zm00001d053636	Endodermal_Initials	0.970754	75
OG0000905	Os02g0699600	Meristem	1.42195	55	Zm00001d051543	Endodermal_Initials	1.07871	40
OG0000905	Os02g0699600	Meristem	1.42195	55	Zm00001d002450	Endodermal_Initials	0.811857	178
OG0001531	Os07g0180900	Meristem	1.42155	56	Zm00001d018957	Endodermal_Initials	0.832143	165
OG0001531	Os07g0180900	Meristem	1.42155	56	Zm00001d007824	Endodermal_Initials	0.826097	169
OG0000930	Os04g0613600	Meristem	1.41937	57	Zm00001d026286	Endodermal_Initials	0.825582	170
OG0000930	Os04g0613600	Meristem	1.41937	57	Zm00001d002339	Endodermal_Initials	0.783442	198
OG0000905	Os04g0598200	Meristem	1.41274	58	Zm00001d051543	Endodermal_Initials	1.07871	40
OG0000905	Os04g0598200	Meristem	1.41274	58	Zm00001d002450	Endodermal_Initials	0.811857	178
OG0003604	Os09g0501200	Meristem	1.4024	61	Zm00001d006064	Endodermal_Initials	1.16714	21
OG0003604	Os09g0501200	Meristem	1.4024	61	Zm00001d021020	Endodermal_Initials	0.837848	158
OG0001061	Os12g0167900	Meristem	1.39743	62	Zm00001d004839	Endodermal_Initials	1.1911	17
OG0001061	Os12g0167900	Meristem	1.39743	62	Zm00001d004841	Endodermal_Initials	0.921238	101
OG0001061	Os12g0167900	Meristem	1.39743	62	Zm00001d003680	Endodermal_Initials	0.862008	144
OG0001061	Os12g0167900	Meristem	1.39743	62	Zm00001d003683	Endodermal_Initials	0.833583	164
OG0001017	Os05g0556900	Meristem	1.39569	63	Zm00001d052075	Endodermal_Initials	1.10541	31
OG0002565	Os02g0534800	Meristem	1.38879	65	Zm00001d000120	Endodermal_Initials	1.09858	33
OG0002565	Os02g0534800	Meristem	1.38879	65	Zm00001d036568	Endodermal_Initials	1.0756	42
OG0001185	Os07g0523700	Meristem	1.38336	66	Zm00001d021652	Endodermal_Initials	0.876742	137
OG0001374	Os04g0473400	Meristem	1.38203	67	Zm00001d050921	Endodermal_Initials	0.996767	63
OG0001374	Os04g0473400	Meristem	1.38203	67	Zm00001d017047	Endodermal_Initials	0.934928	95
OG0001374	Os04g0473400	Meristem	1.38203	67	Zm00001d050920	Endodermal_Initials	0.800778	183
OG0000746	Os05g0207300	Meristem	1.37885	70	Zm00001d010016	Endodermal_Initials	1.18974	18
OG0000746	Os05g0207300	Meristem	1.37885	70	Zm00001d046317	Endodermal_Initials	1.03817	51
OG0000746	Os05g0207300	Meristem	1.37885	70	Zm00001d053547	Endodermal_Initials	0.891625	122
OG0001792	Os02g0478600	Meristem	1.37101	72	Zm00001d009000	Endodermal_Initials	1.03099	54
OG0001208	Os01g0962600	Meristem	1.37005	73	Zm00001d003672	Endodermal_Initials	0.928534	99
OG0001208	Os01g0962600	Meristem	1.37005	73	Zm00001d025413	Endodermal_Initials	0.782626	199
OG0002811	Os11g0602600	Meristem	1.36539	75	Zm00001d047186	Endodermal_Initials	1.31737	7
OG0000930	Os07g0565000	Meristem	1.35914	78	Zm00001d026286	Endodermal_Initials	0.825582	170
OG0000930	Os07g0565000	Meristem	1.35914	78	Zm00001d002339	Endodermal_Initials	0.783442	198
OG0001982	Os02g0284600	Meristem	1.35899	79	Zm00001d036570	Endodermal_Initials	1.00116	61
OG0005387	Os02g0743400	Meristem	1.3542	80	Zm00001d018024	Endodermal_Initials	0.914412	107
OG0002481	Os05g0477300	Meristem	1.3528	81	Zm00001d012992	Endodermal_Initials	0.985686	66
OG0001328	Os08g0156800	Meristem	1.33976	85	Zm00001d032181	Endodermal_Initials	1.3511	5
OG0001127	Os08g0130500	Meristem	1.32803	86	Zm00001d049619	Endodermal_Initials	1.02486	57
OG0001127	Os08g0130500	Meristem	1.32803	86	Zm00001d035201	Endodermal_Initials	0.888347	128
OG0002099	Os02g0489400	Meristem	1.31848	89	Zm00001d053632	Endodermal_Initials	1.15683	23
OG0002099	Os02g0489400	Meristem	1.31848	89	Zm00001d053636	Endodermal_Initials	0.970754	75
OG0003151	Os05g0346300	Meristem	1.31586	91	Zm00001d047707	Endodermal_Initials	0.920991	102
OG0001863	Os01g0348700	Meristem	1.31423	92	Zm00001d003127	Endodermal_Initials	0.907304	109
OG0001863	Os01g0348700	Meristem	1.31423	92	Zm00001d025784	Endodermal_Initials	0.897394	119
OG0004675	Os10g0411700	Meristem	1.30629	96	Zm00001d047697	Endodermal_Initials	0.872016	139
OG0000620	Os01g0938900	Meristem	1.30052	99	Zm00001d047477	Endodermal_Initials	0.781685	200
OG0015772	Os02g0669000	Meristem	1.29258	101	Zm00001d051419	Endodermal_Initials	0.935022	94
OG0001378	Os03g0182600	Meristem	1.29121	103	Zm00001d048253	Endodermal_Initials	1.12188	28
OG0001378	Os03g0182600	Meristem	1.29121	103	Zm00001d006871	Endodermal_Initials	1.08302	36
OG0001378	Os03g0182600	Meristem	1.29121	103	Zm00001d027527	Endodermal_Initials	0.9952	64
OG0003476	Os05g0557000	Meristem	1.28932	104	Zm00001d009509	Endodermal_Initials	1.11675	29
OG0003432	Os10g0170200	Meristem	1.285	106	Zm00001d028426	Endodermal_Initials	0.79646	185
OG0001208	Os04g0430100	Meristem	1.28177	107	Zm00001d003672	Endodermal_Initials	0.928534	99
OG0001208	Os04g0430100	Meristem	1.28177	107	Zm00001d025413	Endodermal_Initials	0.782626	199
OG0001732	Os01g0752300	Meristem	1.27305	111	Zm00001d009579	Endodermal_Initials	0.950512	84
OG0002207	Os07g0641700	Meristem	1.27076	112	Zm00001d029263	Endodermal_Initials	1.0269	55
OG0002207	Os07g0641700	Meristem	1.27076	112	Zm00001d007031	Endodermal_Initials	0.978979	72
OG0002207	Os07g0641700	Meristem	1.27076	112	Zm00001d022307	Endodermal_Initials	0.91941	104
OG0002565	Os04g0413600	Meristem	1.26429	113	Zm00001d000120	Endodermal_Initials	1.09858	33
OG0002565	Os04g0413600	Meristem	1.26429	113	Zm00001d036568	Endodermal_Initials	1.0756	42
OG0000627	Os06g0555400	Meristem	1.26034	115	Zm00001d011741	Endodermal_Initials	0.984211	67
OG0000924	Os04g0605900	Meristem	1.25145	116	Zm00001d026254	Endodermal_Initials	0.960674	79
OG0001374	Os02g0591700	Meristem	1.25026	117	Zm00001d050921	Endodermal_Initials	0.996767	63
OG0001374	Os02g0591700	Meristem	1.25026	117	Zm00001d017047	Endodermal_Initials	0.934928	95
OG0001374	Os02g0591700	Meristem	1.25026	117	Zm00001d050920	Endodermal_Initials	0.800778	183
OG0001863	Os04g0501000	Meristem	1.24931	118	Zm00001d003127	Endodermal_Initials	0.907304	109
OG0001863	Os04g0501000	Meristem	1.24931	118	Zm00001d025784	Endodermal_Initials	0.897394	119
OG0000746	Os01g0205500	Meristem	1.24667	120	Zm00001d010016	Endodermal_Initials	1.18974	18
OG0000746	Os01g0205500	Meristem	1.24667	120	Zm00001d046317	Endodermal_Initials	1.03817	51
OG0000746	Os01g0205500	Meristem	1.24667	120	Zm00001d053547	Endodermal_Initials	0.891625	122
OG0000620	Os05g0373700	Meristem	1.23378	125	Zm00001d047477	Endodermal_Initials	0.781685	200
OG0001301	Os07g0150200	Meristem	1.23323	126	Zm00001d039106	Endodermal_Initials	1.00177	60
OG0000821	Os10g0483000	Meristem	1.23242	127	Zm00001d034855	Endodermal_Initials	1.04177	49
OG0001956	Os12g0508300	Meristem	1.22984	129	Zm00001d041727	Endodermal_Initials	0.979477	71
OG0003292	Os11g0482000	Meristem	1.22799	130	Zm00001d037929	Endodermal_Initials	0.93774	91
OG0001806	Os02g0111700	Meristem	1.22708	131	Zm00001d054065	Endodermal_Initials	0.899449	116
OG0003432	Os03g0249400	Meristem	1.22509	132	Zm00001d028426	Endodermal_Initials	0.79646	185
OG0001423	Os01g0686800	Meristem	1.21733	134	Zm00001d038923	Endodermal_Initials	0.882726	134
OG0001912	Os06g0172600	Meristem	1.21496	135	Zm00001d018410	Endodermal_Initials	1.14695	24
OG0000071	Os10g0510000	Meristem	1.2109	137	Zm00001d013873	Endodermal_Initials	1.10762	30
OG0000071	Os10g0510000	Meristem	1.2109	137	Zm00001d053177	Endodermal_Initials	1.04331	48
OG0000071	Os10g0510000	Meristem	1.2109	137	Zm00001d032480	Endodermal_Initials	0.932344	96
OG0002565	Os02g0162500	Meristem	1.20734	138	Zm00001d000120	Endodermal_Initials	1.09858	33
OG0002565	Os02g0162500	Meristem	1.20734	138	Zm00001d036568	Endodermal_Initials	1.0756	42
OG0000932	Os12g0406200	Meristem	1.20093	140	Zm00001d048159	Endodermal_Initials	0.853925	148
OG0001531	Os03g0796501	Meristem	1.19861	141	Zm00001d018957	Endodermal_Initials	0.832143	165
OG0001531	Os03g0796501	Meristem	1.19861	141	Zm00001d007824	Endodermal_Initials	0.826097	169
OG0002481	Os01g0823300	Meristem	1.19337	144	Zm00001d012992	Endodermal_Initials	0.985686	66
OG0000821	Os03g0851000	Meristem	1.18598	147	Zm00001d034855	Endodermal_Initials	1.04177	49
OG0003476	Os01g0679700	Meristem	1.18559	148	Zm00001d009509	Endodermal_Initials	1.11675	29
OG0000627	Os02g0229000	Meristem	1.17414	149	Zm00001d011741	Endodermal_Initials	0.984211	67
OG0001956	Os11g0634500	Meristem	1.17021	150	Zm00001d041727	Endodermal_Initials	0.979477	71
OG0002614	Os03g0341100	Meristem	1.1538	154	Zm00001d009848	Endodermal_Initials	0.891105	124
OG0000832	Os10g0466700	Meristem	1.15217	155	Zm00001d048368	Endodermal_Initials	1.09248	34
OG0000832	Os10g0466700	Meristem	1.15217	155	Zm00001d051929	Endodermal_Initials	0.940746	88
OG0000932	Os02g0287000	Meristem	1.14977	156	Zm00001d048159	Endodermal_Initials	0.853925	148
OG0001378	Os07g0616600	Meristem	1.14737	159	Zm00001d048253	Endodermal_Initials	1.12188	28
OG0001378	Os07g0616600	Meristem	1.14737	159	Zm00001d006871	Endodermal_Initials	1.08302	36
OG0001378	Os07g0616600	Meristem	1.14737	159	Zm00001d027527	Endodermal_Initials	0.9952	64
OG0004938	Os02g0797200	Meristem	1.12987	163	Zm00001d045121	Endodermal_Initials	0.929255	98
OG0002550	Os04g0515300	Meristem	1.11683	167	Zm00001d006287	Endodermal_Initials	1.01282	58
OG0000821	Os03g0109600	Meristem	1.11571	168	Zm00001d034855	Endodermal_Initials	1.04177	49
OG0001861	Os03g0808300	Meristem	1.10062	172	Zm00001d021839	Endodermal_Initials	1.06035	45
OG0003151	Os03g0297100	Meristem	1.09437	174	Zm00001d047707	Endodermal_Initials	0.920991	102
OG0001806	Os08g0128500	Meristem	1.09108	177	Zm00001d054065	Endodermal_Initials	0.899449	116
OG0001328	Os08g0436800	Meristem	1.08718	178	Zm00001d032181	Endodermal_Initials	1.3511	5
OG0001185	Os07g0450000	Meristem	1.07921	180	Zm00001d021652	Endodermal_Initials	0.876742	137
OG0000377	Os05g0445500	Meristem	1.07664	181	Zm00001d009652	Endodermal_Initials	1.05	46
OG0000377	Os05g0445500	Meristem	1.07664	181	Zm00001d009657	Endodermal_Initials	0.962809	77
OG0000377	Os05g0445500	Meristem	1.07664	181	Zm00001d001899	Endodermal_Initials	0.948023	86
OG0000377	Os05g0445500	Meristem	1.07664	181	Zm00001d009653	Endodermal_Initials	0.820033	173
OG0001423	Os05g0552300	Meristem	1.0746	182	Zm00001d038923	Endodermal_Initials	0.882726	134
OG0004492	Os07g0608700	Meristem	1.06285	183	Zm00001d047271	Endodermal_Initials	1.08053	39
OG0003540	Os01g0304000	Meristem	1.05968	185	Zm00001d010030	Endodermal_Initials	0.983147	68
OG0001040	Os05g0350600	Meristem	1.05573	186	Zm00001d010504	Endodermal_Initials	0.817075	174
OG0000174	Os03g0177900	Meristem	1.05317	187	Zm00001d009868	Endodermal_Initials	0.894296	121
OG0001732	Os05g0565000	Meristem	1.05241	188	Zm00001d009579	Endodermal_Initials	0.950512	84
OG0001017	Os02g0785800	Meristem	1.04968	189	Zm00001d052075	Endodermal_Initials	1.10541	31
OG0002207	Os03g0366000	Meristem	1.04485	191	Zm00001d029263	Endodermal_Initials	1.0269	55
OG0002207	Os03g0366000	Meristem	1.04485	191	Zm00001d007031	Endodermal_Initials	0.978979	72
OG0002207	Os03g0366000	Meristem	1.04485	191	Zm00001d022307	Endodermal_Initials	0.91941	104
OG0004492	Os03g0410900	Meristem	1.03852	193	Zm00001d047271	Endodermal_Initials	1.08053	39
OG0001265	Os06g0156600	Meristem	1.02464	197	Zm00001d016031	Endodermal_Initials	0.897868	118
OG0000377	Os02g0529700	Meristem	1.01758	199	Zm00001d009652	Endodermal_Initials	1.05	46
OG0000377	Os02g0529700	Meristem	1.01758	199	Zm00001d009657	Endodermal_Initials	0.962809	77
OG0000377	Os02g0529700	Meristem	1.01758	199	Zm00001d001899	Endodermal_Initials	0.948023	86
OG0000377	Os02g0529700	Meristem	1.01758	199	Zm00001d009653	Endodermal_Initials	0.820033	173
OG0009381	Os07g0119400	Meristem	1.0093	200	Zm00001d018696	Endodermal_Initials	0.906919	110
OG0009365	Os12g0160100	Phloem	5.45932	1	Zm00001d023477	Endodermis2	2.70199	2
OG0005618	Os07g0531500	Phloem	4.96839	2	Zm00001d021674	Endodermis2	2.58772	3
OG0015225	Os08g0138600	Phloem	4.76929	4	Zm00001d049606	Endodermis2	2.89224	1
OG0016817	Os09g0458900	Phloem	4.67726	5	Zm00001d005895	Endodermis2	1.46927	20
OG0001556	Os02g0581200	Phloem	4.41721	6	Zm00001d016992	Endodermis2	2.01896	10
OG0006651	Os07g0191650	Phloem	4.19647	7	Zm00001d019069	Endodermis2	2.41781	4
OG0012801	Os01g0253400	Phloem	3.41457	10	Zm00001d040275	Endodermis2	1.19138	43
OG0016633	Os07g0586800	Phloem	2.8823	15	Zm00001d021971	Endodermis2	1.30021	32
OG0003849	Os10g0536700	Phloem	2.54238	22	Zm00001d029747	Endodermis2	1.23957	40
OG0001068	Os03g0756300	Phloem	2.3249	26	Zm00001d034062	Endodermis2	1.04361	68
OG0000071	Os10g0510000	Phloem	2.14849	28	Zm00001d013873	Endodermis2	0.925895	114
OG0000071	Os10g0510000	Phloem	2.14849	28	Zm00001d032480	Endodermis2	0.901274	130
OG0000071	Os10g0510000	Phloem	2.14849	28	Zm00001d053177	Endodermis2	0.841682	165
OG0005673	Os05g0518600	Phloem	2.10034	29	Zm00001d010755	Endodermis2	1.38501	26
OG0019953	Os03g0400700	Phloem	2.07796	30	Zm00001d029444	Endodermis2	1.5344	18
OG0013427	Os01g0700000	Phloem	1.88154	35	Zm00001d043736	Endodermis2	0.943956	104
OG0013427	Os01g0700000	Phloem	1.88154	35	Zm00001d011658	Endodermis2	0.860431	155
OG0001265	Os05g0209600	Phloem	1.78308	37	Zm00001d010451	Endodermis2	0.898962	131
OG0003524	Os07g0635900	Phloem	1.6594	43	Zm00001d022264	Endodermis2	1.14254	51
OG0012829	Os03g0176900	Phloem	1.51864	49	Zm00001d027881	Endodermis2	0.884432	142
OG0001265	Os06g0156600	Phloem	1.51056	50	Zm00001d010451	Endodermis2	0.898962	131
OG0001405	Os01g0758200	Phloem	1.4635	58	Zm00001d010740	Endodermis2	0.822725	185
OG0002207	Os03g0366000	Phloem	1.44255	60	Zm00001d029263	Endodermis2	1.00294	81
OG0002207	Os03g0366000	Phloem	1.44255	60	Zm00001d007031	Endodermis2	0.962894	95
OG0002207	Os03g0366000	Phloem	1.44255	60	Zm00001d022307	Endodermis2	0.815129	191
OG0008051	Os05g0547850	Phloem	1.41972	61	Zm00001d009445	Endodermis2	0.825163	181
OG0006837	Os01g0849500	Phloem	1.40995	63	Zm00001d042857	Endodermis2	1.63537	14
OG0006837	Os01g0849500	Phloem	1.40995	63	Zm00001d027681	Endodermis2	0.961203	96
OG0016516	Os06g0664800	Phloem	1.30518	75	Zm00001d046947	Endodermis2	0.930258	110
OG0015514	Os01g0755700	Phloem	1.28692	77	Zm00001d043422	Endodermis2	0.957054	97
OG0021776	Os11g0629100	Phloem	1.26503	81	Zm00001d048799	Endodermis2	1.40571	24
OG0009381	Os07g0119400	Phloem	1.22363	84	Zm00001d018696	Endodermis2	0.978579	88
OG0009986	Os05g0461600	Phloem	1.21117	85	Zm00001d042936	Endodermis2	0.829591	175
OG0002207	Os07g0641700	Phloem	1.14678	93	Zm00001d029263	Endodermis2	1.00294	81
OG0002207	Os07g0641700	Phloem	1.14678	93	Zm00001d007031	Endodermis2	0.962894	95
OG0002207	Os07g0641700	Phloem	1.14678	93	Zm00001d022307	Endodermis2	0.815129	191
OG0015206	Os01g0543100	Phloem	1.10931	100	Zm00001d009373	Endodermis2	1.05099	66
OG0018947	Os01g0327400	Phloem	1.08251	108	Zm00001d009138	Endodermis2	1.08042	60
OG0001315	Os06g0254700	Phloem	1.07996	110	Zm00001d037343	Endodermis2	1.12328	57
OG0020970	Os07g0253000	Phloem	1.02898	124	Zm00001d019320	Endodermis2	1.07837	61
OG0001235	Os02g0508100	Phloem	1.00641	132	Zm00001d016567	Endodermis2	1.28036	34
OG0018902	Os01g0248800	Phloem	0.985309	137	Zm00001d040246	Endodermis2	1.42035	22
OG0009529	Os05g0500500	Phloem	0.957567	143	Zm00001d038608	Endodermis2	1.23375	41
OG0009529	Os05g0500500	Phloem	0.957567	143	Zm00001d010693	Endodermis2	1.06755	64
OG0009540	Os04g0498000	Phloem	0.955896	144	Zm00001d025771	Endodermis2	1.29367	33
OG0019737	Os03g0111200	Phloem	0.928981	152	Zm00001d027330	Endodermis2	0.890212	137
OG0011401	Os03g0120400	Phloem	0.904001	161	Zm00001d027405	Endodermis2	1.05658	65
OG0004024	Os05g0428400	Phloem	0.900386	163	Zm00001d010211	Endodermis2	1.23218	42
OG0000071	Os11g0163100	Phloem	0.827143	186	Zm00001d013873	Endodermis2	0.925895	114
OG0000071	Os11g0163100	Phloem	0.827143	186	Zm00001d032480	Endodermis2	0.901274	130
OG0000071	Os11g0163100	Phloem	0.827143	186	Zm00001d053177	Endodermis2	0.841682	165
OG0000733	Os08g0402500	Phloem	0.818114	189	Zm00001d032287	Endodermis2	1.08958	59
OG0015225	Os08g0138600	Phloem	4.76929	4	Zm00001d049606	Endodermis1	2.16112	4
OG0016817	Os09g0458900	Phloem	4.67726	5	Zm00001d005895	Endodermis1	1.09872	46
OG0001556	Os02g0581200	Phloem	4.41721	6	Zm00001d016992	Endodermis1	1.10514	45
OG0001556	Os02g0581200	Phloem	4.41721	6	Zm00001d050908	Endodermis1	0.679695	195
OG0006651	Os07g0191650	Phloem	4.19647	7	Zm00001d019069	Endodermis1	2.10445	5
OG0016633	Os07g0586800	Phloem	2.8823	15	Zm00001d021971	Endodermis1	0.893042	90
OG0015817	Os02g0773200	Phloem	2.8051	16	Zm00001d018229	Endodermis1	0.854347	104
OG0001241	Os06g0523300	Phloem	2.57455	21	Zm00001d008961	Endodermis1	0.907446	84
OG0001068	Os03g0756300	Phloem	2.3249	26	Zm00001d034062	Endodermis1	0.885369	92
OG0000071	Os10g0510000	Phloem	2.14849	28	Zm00001d012277	Endodermis1	0.707838	176
OG0013972	Os08g0535800	Phloem	1.94782	34	Zm00001d031655	Endodermis1	1.0521	53
OG0001113	Os10g0154700	Phloem	1.77229	39	Zm00001d030339	Endodermis1	1.05379	52
OG0012829	Os03g0176900	Phloem	1.51864	49	Zm00001d027881	Endodermis1	0.690924	187
OG0015376	Os01g0260800	Phloem	1.36733	66	Zm00001d008312	Endodermis1	0.772622	145
OG0000439	Os04g0498600	Phloem	1.3625	67	Zm00001d025773	Endodermis1	1.07013	50
OG0016516	Os06g0664800	Phloem	1.30518	75	Zm00001d046947	Endodermis1	1.22874	29
OG0001931	Os12g0159600	Phloem	1.19296	88	Zm00001d052776	Endodermis1	0.700885	181
OG0015206	Os01g0543100	Phloem	1.10931	100	Zm00001d009373	Endodermis1	1.50406	17
OG0000907	Os02g0642200	Phloem	1.08807	106	Zm00001d017386	Endodermis1	1.00002	63
OG0000907	Os02g0642200	Phloem	1.08807	106	Zm00001d002842	Endodermis1	0.862261	100
OG0001315	Os06g0254700	Phloem	1.07996	110	Zm00001d037343	Endodermis1	1.23561	27
OG0001315	Os06g0254700	Phloem	1.07996	110	Zm00001d044732	Endodermis1	0.738091	160
OG0001113	Os02g0121300	Phloem	1.058	118	Zm00001d030339	Endodermis1	1.05379	52
OG0007689	Os08g0135400	Phloem	1.00646	131	Zm00001d035211	Endodermis1	1.53093	15
OG0009529	Os05g0500500	Phloem	0.957567	143	Zm00001d038608	Endodermis1	0.96392	74
OG0019737	Os03g0111200	Phloem	0.928981	152	Zm00001d027330	Endodermis1	1.19481	36
OG0003972	Os03g0843100	Phloem	0.911314	158	Zm00001d005495	Endodermis1	0.782877	140
OG0000125	Os04g0667800	Phloem	0.88662	166	Zm00001d053897	Endodermis1	1.45325	20
OG0000071	Os11g0163100	Phloem	0.827143	186	Zm00001d012277	Endodermis1	0.707838	176
OG0000907	Os04g0533300	Phloem	0.814694	192	Zm00001d017386	Endodermis1	1.00002	63
OG0000907	Os04g0533300	Phloem	0.814694	192	Zm00001d002842	Endodermis1	0.862261	100
OG0001498	Os02g0778400	Phloem	0.806359	197	Zm00001d035916	Endodermis1	0.834894	111
OG0001973	Os10g0536000	Phloem	0.803361	200	Zm00001d048473	Endodermis1	0.948142	75

## Sheet: ATH_Tom
Table S2: Pairwise comparison of Arabidopsis vs Tomato.
Orthogroup	ATH_MG	ATH_clusters	ATH_avg_log2FC	ATH_rank	Tom_MG	Tom_clusters	Tom_avg_log2FC	Tom_rank
OG0001727	AT4G35350	Xylem	5.05762	1	Solyc12g094700	Xylem	4.79004	2
OG0001727	AT4G35350	Xylem	5.05762	1	Solyc04g082710	Xylem	3.97572	5			Note: Trichoblast = Hair
OG0001727	AT1G20850	Xylem	4.27247	2	Solyc12g094700	Xylem	4.79004	2			Note: Atrichoblast = Nonhair
OG0001727	AT1G20850	Xylem	4.27247	2	Solyc04g082710	Xylem	3.97572	5
OG0001811	AT3G18280	Xylem	3.69932	3	Solyc03g119210	Xylem	1.55404	49
OG0001906	AT5G59290	Xylem	3.39185	5	Solyc11g066150	Xylem	2.96433	13
OG0001906	AT5G59290	Xylem	3.39185	5	Solyc04g011400	Xylem	1.33222	75
OG0000569	AT5G15490	Xylem	3.22899	6	Solyc02g067080	Xylem	1.72702	38
OG0000569	AT5G15490	Xylem	3.22899	6	Solyc03g115380	Xylem	1.49054	57
OG0018628	AT5G16490	Xylem	2.7418	7	Solyc11g008880	Xylem	1.56272	47
OG0003481	AT5G49460	Xylem	2.41921	13	Solyc12g099260	Xylem	1.52436	51
OG0003481	AT5G49460	Xylem	2.41921	13	Solyc01g059880	Xylem	0.583034	199
OG0000287	AT3G53620	Xylem	2.36308	16	Solyc09g010380	Xylem	1.26222	81
OG0000287	AT3G53620	Xylem	2.36308	16	Solyc02g085050	Xylem	1.17395	93
OG0006220	AT3G51030	Xylem	2.18676	17	Solyc02g084710	Xylem	1.00404	110
OG0003109	AT1G35780	Xylem	2.04712	21	Solyc04g073970	Xylem	1.34461	71
OG0002209	AT1G60810	Xylem	2.00874	22	Solyc05g005160	Xylem	1.65557	41
OG0002209	AT1G60810	Xylem	2.00874	22	Solyc01g101040	Xylem	1.4813	59
OG0005437	AT1G68810	Xylem	1.96917	25	Solyc05g009880	Xylem	2.00372	31
OG0000569	AT3G29360	Xylem	1.85012	27	Solyc02g067080	Xylem	1.72702	38
OG0000569	AT3G29360	Xylem	1.85012	27	Solyc03g115380	Xylem	1.49054	57
OG0000893	AT2G13820	Xylem	1.77919	30	Solyc01g105010	Xylem	1.39146	66
OG0000071	AT3G12110	Xylem	1.76566	31	Solyc10g080500	Xylem	1.60048	44
OG0004276	AT1G02640	Xylem	1.6421	36	Solyc01g079570	Xylem	1.68785	39
OG0004902	AT5G67230	Xylem	1.54881	41	Solyc11g011850	Xylem	1.49489	56
OG0001292	AT1G33800	Xylem	1.48605	49	Solyc11g031950	Xylem	1.35566	69
OG0004006	AT1G09210	Xylem	1.43747	55	Solyc01g100380	Xylem	0.969494	112
OG0012698	AT5G06370	Xylem	1.43506	56	Solyc01g007110	Xylem	0.577834	200
OG0003416	AT3G06035	Xylem	1.42731	57	Solyc01g079780	Xylem	1.68034	40
OG0004601	AT2G46225	Xylem	1.41373	59	Solyc01g095280	Xylem	0.895824	122
OG0000101	AT5G12250	Xylem	1.37992	62	Solyc06g035970	Xylem	1.38514	67
OG0000101	AT5G12250	Xylem	1.37992	62	Solyc03g025730	Xylem	0.934846	118
OG0000902	AT3G55990	Xylem	1.34106	64	Solyc03g096030	Xylem	2.86877	14
OG0005437	AT3G25710	Xylem	1.28464	71	Solyc05g009880	Xylem	2.00372	31
OG0007845	AT1G33470	Xylem	1.28205	72	Solyc11g044470	Xylem	0.781893	149
OG0006686	AT5G49720	Xylem	1.2304	80	Solyc01g102580	Xylem	0.953132	115
OG0006935	AT5G59890	Xylem	1.22974	81	Solyc09g010440	Xylem	0.806019	142
OG0006150	AT3G59690	Xylem	1.219	83	Solyc08g014280	Xylem	1.50104	54
OG0011478	AT2G04850	Xylem	1.17973	90	Solyc07g048050	Xylem	1.89531	34
OG0000254	AT1G50010	Xylem	1.14975	94	Solyc04g077020	Xylem	1.11249	98
OG0005714	AT5G56540	Xylem	1.12241	101	Solyc01g005590	Xylem	0.750156	153
OG0001348	AT2G31110	Xylem	1.11692	103	Solyc02g077080	Xylem	1.19338	90
OG0002013	AT4G17890	Xylem	1.10136	105	Solyc08g076920	Xylem	0.780895	150
OG0009096	AT5G54240	Xylem	1.0868	107	Solyc07g063620	Xylem	1.10774	101
OG0004504	AT2G04780	Xylem	1.08469	109	Solyc07g048090	Xylem	2.43039	22
OG0002209	AT1G10670	Xylem	1.08346	110	Solyc05g005160	Xylem	1.65557	41
OG0002209	AT1G10670	Xylem	1.08346	110	Solyc01g101040	Xylem	1.4813	59
OG0001040	AT2G30060	Xylem	1.07947	113	Solyc06g082120	Xylem	0.809544	141
OG0001040	AT2G30060	Xylem	1.07947	113	Solyc08g062660	Xylem	0.714656	170
OG0000071	AT5G09810	Xylem	1.07081	114	Solyc10g080500	Xylem	1.60048	44
OG0003268	AT2G29050	Xylem	1.06563	117	Solyc09g010880	Xylem	0.78016	151
OG0000101	AT5G23860	Xylem	1.06495	118	Solyc06g035970	Xylem	1.38514	67
OG0000101	AT5G23860	Xylem	1.06495	118	Solyc03g025730	Xylem	0.934846	118
OG0000254	AT4G14960	Xylem	1.04842	121	Solyc04g077020	Xylem	1.11249	98
OG0001099	AT2G34410	Xylem	0.993816	134	Solyc02g071120	Xylem	0.6495	185
OG0003319	AT2G40320	Xylem	0.989079	136	Solyc06g050920	Xylem	3.12392	11
OG0000254	AT1G04820	Xylem	0.977716	140	Solyc04g077020	Xylem	1.11249	98
OG0000221	AT1G70490	Xylem	0.96025	144	Solyc05g005190	Xylem	0.913495	121
OG0003418	AT3G03250	Xylem	0.958365	145	Solyc11g011960	Xylem	1.08753	103
OG0000101	AT5G62700	Xylem	0.946963	149	Solyc06g035970	Xylem	1.38514	67
OG0000101	AT5G62700	Xylem	0.946963	149	Solyc03g025730	Xylem	0.934846	118
OG0004514	AT2G35120	Xylem	0.941756	152	Solyc02g068740	Xylem	0.723659	166
OG0005714	AT1G55330	Xylem	0.932165	155	Solyc01g005590	Xylem	0.750156	153
OG0000327	AT1G75840	Xylem	0.921269	158	Solyc02g077400	Xylem	1.83796	35
OG0000723	AT3G17390	Xylem	0.905454	164	Solyc10g083970	Xylem	0.668794	183
OG0001906	AT3G46440	Xylem	0.893488	167	Solyc11g066150	Xylem	2.96433	13
OG0001906	AT3G46440	Xylem	0.893488	167	Solyc04g011400	Xylem	1.33222	75
OG0001292	AT4G09990	Xylem	0.891406	168	Solyc11g031950	Xylem	1.35566	69
OG0002401	AT2G31390	Xylem	0.87732	175	Solyc06g073190	Xylem	2.36176	24
OG0000071	AT3G53750	Xylem	0.85513	181	Solyc10g080500	Xylem	1.60048	44
OG0005714	AT4G26320	Xylem	0.829046	193	Solyc01g005590	Xylem	0.750156	153
OG0000071	AT2G37620	Xylem	0.824857	195	Solyc10g080500	Xylem	1.60048	44
OG0001348	AT1G29050	Xylem	0.821862	196	Solyc02g077080	Xylem	1.19338	90
OG0000499	AT1G12090	Cortex	4.25727	1	Solyc08g078930	EXO_iCOR1	3.61505	1
OG0000499	AT1G12090	Cortex	4.25727	1	Solyc08g078910	EXO_iCOR1	3.4688	2
OG0000499	AT1G12090	Cortex	4.25727	1	Solyc08g078900	EXO_iCOR1	2.21338	9
OG0014804	AT2G45180	Cortex	3.67828	3	Solyc08g074480	EXO_iCOR1	2.23715	8
OG0014804	AT2G45180	Cortex	3.67828	3	Solyc08g005960	EXO_iCOR1	1.83573	18
OG0000509	AT4G30170	Cortex	3.10491	4	Solyc08g069040	EXO_iCOR1	0.92084	89
OG0000101	AT1G75780	Cortex	2.18592	9	Solyc04g081490	EXO_iCOR1	1.55882	27
OG0000101	AT1G75780	Cortex	2.18592	9	Solyc03g025730	EXO_iCOR1	0.732648	132
OG0002400	AT1G03870	Cortex	2.02565	11	Solyc07g053540	EXO_iCOR1	1.34449	37
OG0000499	AT4G12520	Cortex	1.77571	16	Solyc08g078930	EXO_iCOR1	3.61505	1
OG0000499	AT4G12520	Cortex	1.77571	16	Solyc08g078910	EXO_iCOR1	3.4688	2
OG0000499	AT4G12520	Cortex	1.77571	16	Solyc08g078900	EXO_iCOR1	2.21338	9
OG0000416	AT4G23400	Cortex	1.76301	17	Solyc12g056220	EXO_iCOR1	2.00074	12
OG0000416	AT4G23400	Cortex	1.76301	17	Solyc08g008045	EXO_iCOR1	1.52246	31
OG0000416	AT4G23400	Cortex	1.76301	17	Solyc08g081190	EXO_iCOR1	1.19693	52
OG0003760	AT5G46890	Cortex	1.75858	19	Solyc08g079200	EXO_iCOR1	3.09149	3
OG0003760	AT5G46890	Cortex	1.75858	19	Solyc08g078870	EXO_iCOR1	2.95895	4
OG0003760	AT5G46890	Cortex	1.75858	19	Solyc08g079190	EXO_iCOR1	2.86546	5
OG0000499	AT1G62510	Cortex	1.65659	24	Solyc08g078930	EXO_iCOR1	3.61505	1
OG0000499	AT1G62510	Cortex	1.65659	24	Solyc08g078910	EXO_iCOR1	3.4688	2
OG0000499	AT1G62510	Cortex	1.65659	24	Solyc08g078900	EXO_iCOR1	2.21338	9
OG0000499	AT4G12510	Cortex	1.62941	25	Solyc08g078930	EXO_iCOR1	3.61505	1
OG0000499	AT4G12510	Cortex	1.62941	25	Solyc08g078910	EXO_iCOR1	3.4688	2
OG0000499	AT4G12510	Cortex	1.62941	25	Solyc08g078900	EXO_iCOR1	2.21338	9
OG0003760	AT5G46900	Cortex	1.62462	26	Solyc08g079200	EXO_iCOR1	3.09149	3
OG0003760	AT5G46900	Cortex	1.62462	26	Solyc08g078870	EXO_iCOR1	2.95895	4
OG0003760	AT5G46900	Cortex	1.62462	26	Solyc08g079190	EXO_iCOR1	2.86546	5
OG0003007	AT1G25230	Cortex	1.60163	27	Solyc04g008260	EXO_iCOR1	1.10996	63
OG0009323	AT4G20260	Cortex	1.59966	29	Solyc10g005100	EXO_iCOR1	1.38859	35
OG0003987	AT1G76090	Cortex	1.5961	30	Solyc01g111830	EXO_iCOR1	1.12385	60
OG0004230	AT2G06255	Cortex	1.56331	31	Solyc07g041340	EXO_iCOR1	0.585219	188
OG0002949	AT1G19450	Cortex	1.53311	35	Solyc12g089180	EXO_iCOR1	0.81945	103
OG0000101	AT1G20010	Cortex	1.53008	36	Solyc04g081490	EXO_iCOR1	1.55882	27
OG0000101	AT1G20010	Cortex	1.53008	36	Solyc03g025730	EXO_iCOR1	0.732648	132
OG0000370	AT5G15230	Cortex	1.52044	38	Solyc03g116060	EXO_iCOR1	2.35677	7
OG0018590	AT4G35100	Cortex	1.43495	44	Solyc10g055630	EXO_iCOR1	0.607165	175
OG0004717	AT3G12610	Cortex	1.42294	47	Solyc01g086920	EXO_iCOR1	0.86041	97
OG0000292	AT5G60660	Cortex	1.41207	50	Solyc06g011350	EXO_iCOR1	2.12688	11
OG0000292	AT5G60660	Cortex	1.41207	50	Solyc09g007770	EXO_iCOR1	1.97866	14
OG0000292	AT5G60660	Cortex	1.41207	50	Solyc09g007760	EXO_iCOR1	1.69686	20
OG0000292	AT5G60660	Cortex	1.41207	50	Solyc11g069430	EXO_iCOR1	1.58709	25
OG0000416	AT4G00430	Cortex	1.30684	61	Solyc12g056220	EXO_iCOR1	2.00074	12
OG0000416	AT4G00430	Cortex	1.30684	61	Solyc08g008045	EXO_iCOR1	1.52246	31
OG0000416	AT4G00430	Cortex	1.30684	61	Solyc08g081190	EXO_iCOR1	1.19693	52
OG0000416	AT3G61430	Cortex	1.30363	62	Solyc12g056220	EXO_iCOR1	2.00074	12
OG0000416	AT3G61430	Cortex	1.30363	62	Solyc08g008045	EXO_iCOR1	1.52246	31
OG0000416	AT3G61430	Cortex	1.30363	62	Solyc08g081190	EXO_iCOR1	1.19693	52
OG0003029	AT1G78570	Cortex	1.19418	71	Solyc07g062130	EXO_iCOR1	0.638944	165
OG0001212	AT4G24220	Cortex	1.17532	74	Solyc10g049620	EXO_iCOR1	0.833522	100
OG0003966	AT1G76670	Cortex	1.16585	76	Solyc12g095790	EXO_iCOR1	0.797689	108
OG0000292	AT3G53420	Cortex	1.10517	85	Solyc06g011350	EXO_iCOR1	2.12688	11
OG0000292	AT3G53420	Cortex	1.10517	85	Solyc09g007770	EXO_iCOR1	1.97866	14
OG0000292	AT3G53420	Cortex	1.10517	85	Solyc09g007760	EXO_iCOR1	1.69686	20
OG0000292	AT3G53420	Cortex	1.10517	85	Solyc11g069430	EXO_iCOR1	1.58709	25
OG0000952	AT4G12730	Cortex	1.09704	86	Solyc07g045440	EXO_iCOR1	1.53641	29
OG0000952	AT4G12730	Cortex	1.09704	86	Solyc10g005960	EXO_iCOR1	1.01789	74
OG0000292	AT2G37170	Cortex	1.05938	95	Solyc06g011350	EXO_iCOR1	2.12688	11
OG0000292	AT2G37170	Cortex	1.05938	95	Solyc09g007770	EXO_iCOR1	1.97866	14
OG0000292	AT2G37170	Cortex	1.05938	95	Solyc09g007760	EXO_iCOR1	1.69686	20
OG0000292	AT2G37170	Cortex	1.05938	95	Solyc11g069430	EXO_iCOR1	1.58709	25
OG0004330	AT1G05850	Cortex	1.04504	100	Solyc09g098540	EXO_iCOR1	0.593343	183
OG0001064	AT5G43060	Cortex	1.04408	101	Solyc12g088670	EXO_iCOR1	0.628844	168
OG0001075	AT1G55360	Cortex	1.03549	102	Solyc01g081570	EXO_iCOR1	1.28254	43
OG0000589	AT3G07010	Cortex	1.03476	103	Solyc05g014000	EXO_iCOR1	1.29764	40
OG0000254	AT1G50010	Cortex	1.03223	104	Solyc04g077020	EXO_iCOR1	1.08439	65
OG0000254	AT1G50010	Cortex	1.03223	104	Solyc08g006890	EXO_iCOR1	1.0391	69
OG0000361	AT1G76160	Cortex	0.995236	113	Solyc04g082140	EXO_iCOR1	0.909222	90
OG0000361	AT1G76160	Cortex	0.995236	113	Solyc07g052240	EXO_iCOR1	0.735759	130
OG0006686	AT5G49720	Cortex	0.990449	115	Solyc05g005080	EXO_iCOR1	1.36417	36
OG0003314	AT4G32410	Cortex	0.967267	119	Solyc08g061100	EXO_iCOR1	0.592559	184
OG0009751	AT5G05170	Cortex	0.948534	124	Solyc01g087210	EXO_iCOR1	0.766952	119
OG0000723	AT3G17390	Cortex	0.939451	126	Solyc09g008280	EXO_iCOR1	0.764509	121
OG0002404	AT1G76490	Cortex	0.932204	128	Solyc02g082260	EXO_iCOR1	0.716924	139
OG0000254	AT1G04820	Cortex	0.919559	134	Solyc04g077020	EXO_iCOR1	1.08439	65
OG0000254	AT1G04820	Cortex	0.919559	134	Solyc08g006890	EXO_iCOR1	1.0391	69
OG0000929	AT3G16240	Cortex	0.864429	150	Solyc12g044330	EXO_iCOR1	1.14795	57
OG0004182	AT1G08200	Cortex	0.854559	155	Solyc01g009420	EXO_iCOR1	0.961755	83
OG0000764	AT5G60920	Cortex	0.846921	157	Solyc02g065765	EXO_iCOR1	0.793335	113
OG0007892	AT1G30690	Cortex	0.845901	158	Solyc02g070210	EXO_iCOR1	0.840039	99
OG0000965	AT5G13750	Cortex	0.832571	160	Solyc01g096740	EXO_iCOR1	0.648949	160
OG0001064	AT1G47128	Cortex	0.814634	173	Solyc12g088670	EXO_iCOR1	0.628844	168
OG0000361	AT4G22010	Cortex	0.806262	177	Solyc04g082140	EXO_iCOR1	0.909222	90
OG0000361	AT4G22010	Cortex	0.806262	177	Solyc07g052240	EXO_iCOR1	0.735759	130
OG0000838	AT1G04250	Cortex	0.797786	179	Solyc09g083290	EXO_iCOR1	0.770333	117
OG0000929	AT4G17340	Cortex	0.78278	182	Solyc12g044330	EXO_iCOR1	1.14795	57
OG0000416	AT1G01620	Cortex	0.776796	189	Solyc12g056220	EXO_iCOR1	2.00074	12
OG0000416	AT1G01620	Cortex	0.776796	189	Solyc08g008045	EXO_iCOR1	1.52246	31
OG0000416	AT1G01620	Cortex	0.776796	189	Solyc08g081190	EXO_iCOR1	1.19693	52
OG0014670	AT5G44020	Cortex	0.773944	194	Solyc09g090600	EXO_iCOR1	0.723004	133
OG0000929	AT5G47450	Cortex	0.770332	195	Solyc12g044330	EXO_iCOR1	1.14795	57
OG0005647	AT4G02270	Trichoblast1	5.43111	2	Solyc09g075410	Epidermis1	4.20487	2
OG0005647	AT3G62680	Trichoblast1	5.24054	3	Solyc09g075410	Epidermis1	4.20487	2
OG0003086	AT4G00680	Trichoblast1	4.56195	9	Solyc06g035980	Epidermis1	4.7186	1
OG0003086	AT1G01750	Trichoblast1	3.93589	15	Solyc06g035980	Epidermis1	4.7186	1
OG0009323	AT5G44610	Trichoblast1	3.83765	17	Solyc10g005100	Epidermis1	1.0322	163
OG0011789	AT5G04960	Trichoblast1	3.8147	18	Solyc02g014300	Epidermis1	2.96173	17
OG0004896	AT4G28850	Trichoblast1	3.73862	20	Solyc12g007270	Epidermis1	1.17694	128
OG0002400	AT2G20520	Trichoblast1	3.55675	22	Solyc07g053540	Epidermis1	1.04728	159
OG0005647	AT1G54970	Trichoblast1	3.54791	23	Solyc09g075410	Epidermis1	4.20487	2
OG0000287	AT4G01480	Trichoblast1	3.34656	28	Solyc12g055830	Epidermis1	2.74101	24
OG0002774	AT5G22410	Trichoblast1	3.17284	32	Solyc01g009410	Epidermis1	3.55276	8
OG0002297	AT3G05490	Trichoblast1	3.16938	33	Solyc01g099520	Epidermis1	2.26993	33
OG0002004	AT3G54040	Trichoblast1	3.13246	35	Solyc10g086710	Epidermis1	2.83962	21
OG0001117	AT4G34580	Trichoblast1	2.92767	37	Solyc01g109860	Epidermis1	1.97724	49
OG0007946	AT1G62980	Trichoblast1	2.90717	39	Solyc08g080060	Epidermis1	3.18086	13
OG0011021	AT1G30870	Trichoblast1	2.8987	40	Solyc02g082090	Epidermis1	4.14507	3
OG0007946	AT1G12560	Trichoblast1	2.84631	44	Solyc08g080060	Epidermis1	3.18086	13
OG0008148	AT3G60280	Trichoblast1	2.79501	46	Solyc01g090120	Epidermis1	3.33153	12
OG0000071	AT3G18780	Trichoblast1	2.71462	48	Solyc04g011500	Epidermis1	1.77357	60
OG0000071	AT3G18780	Trichoblast1	2.71462	48	Solyc10g080500	Epidermis1	1.3434	96
OG0004063	AT1G63220	Trichoblast1	2.61343	51	Solyc08g080680	Epidermis1	1.19109	121
OG0002400	AT5G44130	Trichoblast1	2.4786	57	Solyc07g053540	Epidermis1	1.04728	159
OG0011426	AT2G39900	Trichoblast1	2.3411	62	Solyc05g052780	Epidermis1	1.46388	81
OG0001481	AT5G56170	Trichoblast1	2.32219	63	Solyc07g066100	Epidermis1	1.01425	169
OG0001407	AT3G07880	Trichoblast1	2.31791	65	Solyc11g012270	Epidermis1	1.89549	53
OG0000287	AT2G46860	Trichoblast1	2.25105	71	Solyc12g055830	Epidermis1	2.74101	24
OG0001134	AT2G39518	Trichoblast1	2.24694	72	Solyc04g051270	Epidermis1	2.01425	45
OG0002736	AT5G46870	Trichoblast1	2.06452	81	Solyc08g076530	Epidermis1	1.31653	104
OG0002661	AT4G23710	Trichoblast1	1.96014	89	Solyc05g056020	Epidermis1	1.10816	143
OG0003307	AT2G41970	Trichoblast1	1.90407	91	Solyc03g059080	Epidermis1	1.09861	146
OG0002394	AT1G10200	Trichoblast1	1.9028	92	Solyc03g114000	Epidermis1	0.943603	184
OG0000178	AT2G23620	Trichoblast1	1.89213	94	Solyc03g070380	Epidermis1	1.28224	110
OG0001399	AT4G26690	Trichoblast1	1.88551	96	Solyc07g065120	Epidermis1	1.79025	58
OG0001997	AT3G23600	Trichoblast1	1.84215	101	Solyc01g080220	Epidermis1	1.05385	157
OG0000249	AT1G73580	Trichoblast1	1.83525	102	Solyc02g091520	Epidermis1	2.07615	41
OG0000249	AT1G73580	Trichoblast1	1.83525	102	Solyc03g118720	Epidermis1	0.90873	195
OG0002980	AT2G03720	Trichoblast1	1.81866	104	Solyc06g069420	Epidermis1	1.8114	57
OG0002980	AT2G03720	Trichoblast1	1.81866	104	Solyc03g114820	Epidermis1	1.45956	82
OG0014670	AT5G44020	Trichoblast1	1.76504	109	Solyc09g090600	Epidermis1	2.13178	37
OG0000327	AT1G20090	Trichoblast1	1.74122	112	Solyc02g083580	Epidermis1	1.0266	165
OG0000328	AT4G38920	Trichoblast1	1.69344	120	Solyc02g084360	Epidermis1	1.10979	141
OG0005662	AT1G78260	Trichoblast1	1.68068	124	Solyc04g074310	Epidermis1	0.955356	181
OG0000327	AT1G75840	Trichoblast1	1.658	129	Solyc02g083580	Epidermis1	1.0266	165
OG0005647	AT2G47540	Trichoblast1	1.65137	130	Solyc09g075410	Epidermis1	4.20487	2
OG0002228	AT3G46830	Trichoblast1	1.63578	133	Solyc06g005810	Epidermis1	1.60492	72
OG0002400	AT1G03870	Trichoblast1	1.63505	134	Solyc07g053540	Epidermis1	1.04728	159
OG0000071	AT1G49240	Trichoblast1	1.63069	136	Solyc04g011500	Epidermis1	1.77357	60
OG0000071	AT1G49240	Trichoblast1	1.63069	136	Solyc10g080500	Epidermis1	1.3434	96
OG0000328	AT1G19910	Trichoblast1	1.61624	141	Solyc02g084360	Epidermis1	1.10979	141
OG0000158	AT1G53680	Trichoblast1	1.58845	147	Solyc07g056420	Epidermis1	1.82321	56
OG0000158	AT1G53680	Trichoblast1	1.58845	147	Solyc07g056470	Epidermis1	1.42531	84
OG0005500	AT1G27330	Trichoblast1	1.58705	148	Solyc05g015530	Epidermis1	1.00595	173
OG0001431	AT3G14350	Trichoblast1	1.583	149	Solyc03g123740	Epidermis1	1.15002	132
OG0004680	AT5G67500	Trichoblast1	1.57849	152	Solyc02g092440	Epidermis1	1.27329	111
OG0005760	AT1G12040	Trichoblast1	1.5661	154	Solyc11g005150	Epidermis1	2.14891	36
OG0002228	AT5G59150	Trichoblast1	1.56456	155	Solyc06g005810	Epidermis1	1.60492	72
OG0009797	AT5G59520	Trichoblast1	1.54737	158	Solyc06g005620	Epidermis1	1.3316	97
OG0000328	AT4G34720	Trichoblast1	1.52279	164	Solyc02g084360	Epidermis1	1.10979	141
OG0011073	AT1G48930	Trichoblast1	1.49552	171	Solyc02g014220	Epidermis1	2.90907	19
OG0000825	AT1G70460	Trichoblast1	1.46331	177	Solyc02g089760	Epidermis1	0.934319	189
OG0000327	AT4G35950	Trichoblast1	1.45471	179	Solyc02g083580	Epidermis1	1.0266	165
OG0000328	AT2G16510	Trichoblast1	1.43124	184	Solyc02g084360	Epidermis1	1.10979	141
OG0004018	AT1G16170	Trichoblast1	1.42502	186	Solyc03g117760	Epidermis1	1.02217	166
OG0007946	AT1G62980	Trichoblast2	2.72561	1	Solyc08g080060	Epidermis1	3.18086	13
OG0007946	AT1G12560	Trichoblast2	2.61994	2	Solyc08g080060	Epidermis1	3.18086	13
OG0011021	AT1G30870	Trichoblast2	2.3733	7	Solyc02g082090	Epidermis1	4.14507	3
OG0000287	AT4G01480	Trichoblast2	2.3052	8	Solyc12g055830	Epidermis1	2.74101	24
OG0001117	AT4G34580	Trichoblast2	2.05826	11	Solyc01g109860	Epidermis1	1.97724	49
OG0002004	AT3G54040	Trichoblast2	1.92253	14	Solyc10g086710	Epidermis1	2.83962	21
OG0001407	AT3G07880	Trichoblast2	1.87229	16	Solyc11g012270	Epidermis1	1.89549	53
OG0011073	AT1G48930	Trichoblast2	1.80924	19	Solyc02g014220	Epidermis1	2.90907	19
OG0004515	AT2G24260	Trichoblast2	1.70301	23	Solyc12g010170	Epidermis1	1.02203	167
OG0002774	AT5G22410	Trichoblast2	1.68561	25	Solyc01g009410	Epidermis1	3.55276	8
OG0003307	AT2G41970	Trichoblast2	1.68144	26	Solyc03g059080	Epidermis1	1.09861	146
OG0003086	AT1G01750	Trichoblast2	1.66042	27	Solyc06g035980	Epidermis1	4.7186	1
OG0003086	AT4G00680	Trichoblast2	1.64588	31	Solyc06g035980	Epidermis1	4.7186	1
OG0000929	AT5G47450	Trichoblast2	1.62627	33	Solyc12g044330	Epidermis1	1.3303	98
OG0000929	AT5G47450	Trichoblast2	1.62627	33	Solyc06g060760	Epidermis1	1.11976	138
OG0009096	AT4G27350	Trichoblast2	1.60129	37	Solyc07g063620	Epidermis1	1.30036	108
OG0005647	AT2G47540	Trichoblast2	1.55991	41	Solyc09g075410	Epidermis1	4.20487	2
OG0014670	AT5G44020	Trichoblast2	1.46497	51	Solyc09g090600	Epidermis1	2.13178	37
OG0002297	AT3G05490	Trichoblast2	1.46454	52	Solyc01g099520	Epidermis1	2.26993	33
OG0004063	AT1G63220	Trichoblast2	1.43057	56	Solyc08g080680	Epidermis1	1.19109	121
OG0001134	AT2G39518	Trichoblast2	1.42059	58	Solyc04g051270	Epidermis1	2.01425	45
OG0000929	AT4G17340	Trichoblast2	1.27807	75	Solyc12g044330	Epidermis1	1.3303	98
OG0000929	AT4G17340	Trichoblast2	1.27807	75	Solyc06g060760	Epidermis1	1.11976	138
OG0002661	AT4G23710	Trichoblast2	1.24282	82	Solyc05g056020	Epidermis1	1.10816	143
OG0001481	AT5G56170	Trichoblast2	1.19528	94	Solyc07g066100	Epidermis1	1.01425	169
OG0000825	AT1G70460	Trichoblast2	1.13573	106	Solyc02g089760	Epidermis1	0.934319	189
OG0000071	AT3G18780	Trichoblast2	1.1279	114	Solyc04g011500	Epidermis1	1.77357	60
OG0000071	AT3G18780	Trichoblast2	1.1279	114	Solyc10g080500	Epidermis1	1.3434	96
OG0004927	AT5G65690	Trichoblast2	1.11723	119	Solyc04g076880	Epidermis1	1.23967	117
OG0001033	AT1G04280	Trichoblast2	1.09839	124	Solyc06g053810	Epidermis1	1.31954	101
OG0001997	AT3G23600	Trichoblast2	1.0876	128	Solyc01g080220	Epidermis1	1.05385	157
OG0005647	AT1G54970	Trichoblast2	1.07405	130	Solyc09g075410	Epidermis1	4.20487	2
OG0000261	AT2G44450	Trichoblast2	1.046	135	Solyc01g074030	Epidermis1	1.30305	107
OG0005647	AT3G62680	Trichoblast2	1.0241	145	Solyc09g075410	Epidermis1	4.20487	2
OG0002980	AT2G03720	Trichoblast2	1.02191	146	Solyc06g069420	Epidermis1	1.8114	57
OG0002980	AT2G03720	Trichoblast2	1.02191	146	Solyc03g114820	Epidermis1	1.45956	82
OG0000158	AT1G53680	Trichoblast2	1.01744	148	Solyc07g056420	Epidermis1	1.82321	56
OG0000158	AT1G53680	Trichoblast2	1.01744	148	Solyc07g056470	Epidermis1	1.42531	84
OG0001974	AT5G16910	Trichoblast2	1.00818	152	Solyc03g097050	Epidermis1	0.915272	192
OG0001055	AT1G14010	Trichoblast2	1.00023	157	Solyc01g010940	Epidermis1	1.02942	164
OG0011426	AT2G39900	Trichoblast2	0.955117	173	Solyc05g052780	Epidermis1	1.46388	81
OG0009323	AT5G44610	Trichoblast2	0.951097	177	Solyc10g005100	Epidermis1	1.0322	163
OG0007857	AT4G00460	Trichoblast2	0.940226	180	Solyc01g094610	Epidermis1	1.08353	151
OG0000328	AT1G19910	Trichoblast2	0.917443	191	Solyc02g084360	Epidermis1	1.10979	141
OG0000328	AT4G38920	Trichoblast2	0.89994	200	Solyc02g084360	Epidermis1	1.10979	141
OG0011420	AT2G37130	Atrichoblast1	3.08059	4	Solyc09g007520	Epidermis2	3.12443	14
OG0001138	AT2G43590	Atrichoblast1	2.61343	8	Solyc04g072000	Epidermis2	1.41942	104
OG0002542	AT4G19030	Atrichoblast1	2.44196	10	Solyc02g071920	Epidermis2	1.41649	106
OG0008778	AT3G19660	Atrichoblast1	1.64216	35	Solyc01g106890	Epidermis2	1.37361	116
OG0011246	AT1G25275	Atrichoblast1	1.42986	50	Solyc01g150164	Epidermis2	2.53459	27
OG0002385	AT1G30700	Atrichoblast1	1.35402	59	Solyc02g070090	Epidermis2	2.44269	29
OG0000487	AT1G22400	Atrichoblast1	1.25229	74	Solyc12g057060	Epidermis2	2.31193	32
OG0002564	AT4G16190	Atrichoblast1	1.23379	79	Solyc01g110110	Epidermis2	1.91865	50
OG0000834	AT1G03220	Atrichoblast1	1.22163	83	Solyc01g080010	Epidermis2	3.66602	6
OG0003129	AT1G78830	Atrichoblast1	1.18699	89	Solyc07g062490	Epidermis2	1.66724	69
OG0002636	AT4G13180	Atrichoblast1	1.14554	98	Solyc06g071060	Epidermis2	1.01291	193
OG0012013	AT3G28210	Atrichoblast1	1.07125	116	Solyc02g087210	Epidermis2	1.27035	137
OG0010659	AT1G71950	Atrichoblast1	1.01916	136	Solyc06g065370	Epidermis2	1.18949	148
OG0001064	AT1G47128	Atrichoblast1	1.00847	142	Solyc04g078540	Epidermis2	2.71133	20
OG0012914	AT5G13190	Atrichoblast1	0.999339	146	Solyc01g009780	Epidermis2	1.82491	58
OG0000491	AT3G01290	Atrichoblast1	0.95701	161	Solyc03g113220	Epidermis2	1.99365	46
OG0004162	AT2G33150	Atrichoblast1	0.947181	166	Solyc09g091470	Epidermis2	1.18719	149
OG0004443	AT3G53480	Atrichoblast1	0.895054	185	Solyc01g101070	Epidermis2	2.04423	41
OG0001984	AT4G13510	Atrichoblast1	0.881663	192	Solyc09g090730	Epidermis2	2.27747	34
OG0004419	AT2G39420	Atrichoblast1	0.880327	193	Solyc04g010250	Epidermis2	1.81563	62
OG0001008	AT1G60730	Atrichoblast1	0.870101	200	Solyc09g097960	Epidermis2	1.98864	47
OG0001140	AT2G21660	Atrichoblast2	1.99847	5	Solyc01g109660	MZ	0.99525	200
OG0004105	AT1G27400	Atrichoblast2	1.91695	6	Solyc06g071880	MZ	1.48176	20
OG0004105	AT1G27400	Atrichoblast2	1.91695	6	Solyc06g071870	MZ	1.31628	63
OG0000905	AT2G37190	Atrichoblast2	1.91572	7	Solyc06g075180	MZ	1.051	182
OG0002512	AT2G18020	Atrichoblast2	1.91187	8	Solyc07g063890	MZ	1.40888	32
OG0002512	AT2G18020	Atrichoblast2	1.91187	8	Solyc10g006580	MZ	1.34533	51
OG0001301	AT2G32060	Atrichoblast2	1.90961	9	Solyc12g042650	MZ	1.19453	106
OG0001173	AT5G02960	Atrichoblast2	1.89424	10	Solyc10g086020	MZ	1.4101	31
OG0001173	AT5G02960	Atrichoblast2	1.89424	10	Solyc10g084310	MZ	1.32737	57
OG0001173	AT5G02960	Atrichoblast2	1.89424	10	Solyc09g007350	MZ	1.04506	183
OG0003476	AT3G60245	Atrichoblast2	1.89344	11	Solyc08g077720	MZ	1.27542	71
OG0002614	AT5G27850	Atrichoblast2	1.84773	12	Solyc01g099900	MZ	1.31321	65
OG0002614	AT5G27850	Atrichoblast2	1.84773	12	Solyc09g075290	MZ	1.23974	89
OG0000377	AT2G27710	Atrichoblast2	1.84768	13	Solyc06g074430	MZ	1.38735	40
OG0000377	AT2G27710	Atrichoblast2	1.84768	13	Solyc01g009447	MZ	1.26595	75
OG0000377	AT2G27710	Atrichoblast2	1.84768	13	Solyc11g067100	MZ	1.14824	130
OG0001454	AT3G62870	Atrichoblast2	1.84647	14	Solyc06g064470	MZ	1.31949	59
OG0001454	AT3G62870	Atrichoblast2	1.84647	14	Solyc01g097760	MZ	1.20174	102
OG0001454	AT3G62870	Atrichoblast2	1.84647	14	Solyc06g050120	MZ	1.12933	142
OG0001759	AT5G22440	Atrichoblast2	1.84088	15	Solyc11g068420	MZ	1.06634	173
OG0001290	AT1G09690	Atrichoblast2	1.82788	16	Solyc10g080590	MZ	1.34969	49
OG0001290	AT1G09690	Atrichoblast2	1.82788	16	Solyc10g078960	MZ	1.16859	118
OG0002612	AT3G07110	Atrichoblast2	1.8274	17	Solyc05g053670	MZ	1.02117	192
OG0000746	AT5G45775	Atrichoblast2	1.82218	18	Solyc12g010930	MZ	1.25206	83
OG0000746	AT5G45775	Atrichoblast2	1.82218	18	Solyc10g007980	MZ	1.18852	110
OG0000746	AT5G45775	Atrichoblast2	1.82218	18	Solyc02g086240	MZ	1.13786	136
OG0000746	AT5G45775	Atrichoblast2	1.82218	18	Solyc07g055230	MZ	1.13497	139
OG0001301	AT1G15930	Atrichoblast2	1.82081	19	Solyc12g042650	MZ	1.19453	106
OG0001567	AT4G16720	Atrichoblast2	1.79937	20	Solyc06g064630	MZ	1.56689	10
OG0001567	AT4G16720	Atrichoblast2	1.79937	20	Solyc06g060400	MZ	1.39741	37
OG0001567	AT4G16720	Atrichoblast2	1.79937	20	Solyc04g008460	MZ	1.23687	91
OG0000932	AT4G34670	Atrichoblast2	1.77464	22	Solyc06g072490	MZ	1.175	116
OG0000932	AT4G34670	Atrichoblast2	1.77464	22	Solyc09g082520	MZ	1.12408	145
OG0000932	AT4G34670	Atrichoblast2	1.77464	22	Solyc03g097900	MZ	1.10045	157
OG0001806	AT3G16080	Atrichoblast2	1.77336	23	Solyc03g120780	MZ	1.48125	21
OG0001806	AT3G16080	Atrichoblast2	1.77336	23	Solyc06g066660	MZ	1.40643	33
OG0002288	AT3G62250	Atrichoblast2	1.76801	24	Solyc12g099025	MZ	1.26376	77
OG0002288	AT3G62250	Atrichoblast2	1.76801	24	Solyc01g068045	MZ	1.22671	94
OG0002288	AT3G62250	Atrichoblast2	1.76801	24	Solyc12g098940	MZ	1.12173	148
OG0003646	AT5G57290	Atrichoblast2	1.76305	25	Solyc07g009330	MZ	1.36795	43
OG0002811	AT5G15200	Atrichoblast2	1.74839	26	Solyc01g010580	MZ	1.11076	153
OG0001485	AT5G18380	Atrichoblast2	1.74305	27	Solyc04g026100	MZ	1.17985	115
OG0001485	AT5G18380	Atrichoblast2	1.74305	27	Solyc01g068530	MZ	1.08659	161
OG0002550	AT4G27090	Atrichoblast2	1.73851	28	Solyc06g083820	MZ	1.58832	9
OG0002550	AT4G27090	Atrichoblast2	1.73851	28	Solyc09g066430	MZ	1.47548	22
OG0001982	AT3G22230	Atrichoblast2	1.73729	29	Solyc06g073300	MZ	1.03013	187
OG0001982	AT3G22230	Atrichoblast2	1.73729	29	Solyc07g043360	MZ	1.02985	188
OG0003373	AT5G56710	Atrichoblast2	1.73185	31	Solyc05g008010	MZ	1.18987	109
OG0003373	AT5G56710	Atrichoblast2	1.73185	31	Solyc12g008720	MZ	1.08591	162
OG0001732	AT2G34480	Atrichoblast2	1.72931	32	Solyc08g016180	MZ	1.22032	95
OG0002462	AT3G53740	Atrichoblast2	1.72891	33	Solyc03g025520	MZ	1.02184	191
OG0001745	AT1G77940	Atrichoblast2	1.72846	34	Solyc01g009100	MZ	1.31741	61
OG0001745	AT1G77940	Atrichoblast2	1.72846	34	Solyc04g072660	MZ	1.01424	196
OG0002658	AT5G39740	Atrichoblast2	1.72484	35	Solyc06g007670	MZ	1.13312	140
OG0002658	AT5G39740	Atrichoblast2	1.72484	35	Solyc06g082870	MZ	1.10024	158
OG0002605	AT4G13850	Atrichoblast2	1.70119	38	Solyc05g053780	MZ	1.43749	28
OG0001863	AT2G39460	Atrichoblast2	1.70063	39	Solyc09g005720	MZ	1.18377	112
OG0001863	AT2G39460	Atrichoblast2	1.70063	39	Solyc10g086330	MZ	1.05471	180
OG0004023	AT1G70600	Atrichoblast2	1.69941	40	Solyc03g112360	MZ	1.31648	62
OG0004023	AT1G70600	Atrichoblast2	1.69941	40	Solyc06g071720	MZ	1.10756	154
OG0001045	AT2G41840	Atrichoblast2	1.69372	42	Solyc04g074300	MZ	1.44738	24
OG0001045	AT2G41840	Atrichoblast2	1.69372	42	Solyc04g063290	MZ	1.15154	127
OG0004105	AT1G67430	Atrichoblast2	1.69011	43	Solyc06g071880	MZ	1.48176	20
OG0004105	AT1G67430	Atrichoblast2	1.69011	43	Solyc06g071870	MZ	1.31628	63
OG0000905	AT5G60670	Atrichoblast2	1.68602	44	Solyc06g075180	MZ	1.051	182
OG0000924	AT2G01250	Atrichoblast2	1.67928	45	Solyc07g008370	MZ	1.29524	69
OG0003344	AT2G21580	Atrichoblast2	1.6693	46	Solyc02g069850	MZ	1.44199	25
OG0003344	AT2G21580	Atrichoblast2	1.6693	46	Solyc10g052660	MZ	1.06855	171
OG0006112	AT2G19730	Atrichoblast2	1.66531	47	Solyc03g121330	MZ	1.34249	52
OG0001863	AT3G55280	Atrichoblast2	1.66455	48	Solyc09g005720	MZ	1.18377	112
OG0001863	AT3G55280	Atrichoblast2	1.66455	48	Solyc10g086330	MZ	1.05471	180
OG0001982	AT4G15000	Atrichoblast2	1.64659	49	Solyc06g073300	MZ	1.03013	187
OG0001982	AT4G15000	Atrichoblast2	1.64659	49	Solyc07g043360	MZ	1.02985	188
OG0001127	AT3G09200	Atrichoblast2	1.64361	50	Solyc05g054580	MZ	1.24673	85
OG0001954	AT4G00100	Atrichoblast2	1.64322	51	Solyc11g072260	MZ	1.41785	30
OG0001954	AT4G00100	Atrichoblast2	1.64322	51	Solyc03g083530	MZ	1.08286	163
OG0001954	AT4G00100	Atrichoblast2	1.64322	51	Solyc05g051000	MZ	1.04255	184
OG0001759	AT1G08360	Atrichoblast2	1.63642	52	Solyc11g068420	MZ	1.06634	173
OG0003432	AT3G45030	Atrichoblast2	1.61643	54	Solyc01g096580	MZ	1.49924	16
OG0003432	AT3G45030	Atrichoblast2	1.61643	54	Solyc01g096590	MZ	1.2671	74
OG0002485	AT5G58420	Atrichoblast2	1.61405	55	Solyc02g070340	MZ	1.25357	82
OG0002643	AT3G49010	Atrichoblast2	1.61054	56	Solyc08g075700	MZ	1.19111	108
OG0001208	AT5G41520	Atrichoblast2	1.60523	57	Solyc01g099670	MZ	1.36743	44
OG0000627	AT3G04920	Atrichoblast2	1.6044	58	Solyc09g065330	MZ	1.483	19
OG0000627	AT3G04920	Atrichoblast2	1.6044	58	Solyc06g084230	MZ	1.33937	54
OG0000627	AT3G04920	Atrichoblast2	1.6044	58	Solyc01g097870	MZ	1.18235	113
OG0002539	AT3G09500	Atrichoblast2	1.5965	60	Solyc04g010240	MZ	1.3161	64
OG0001017	AT1G41880	Atrichoblast2	1.59501	61	Solyc05g052810	MZ	1.20375	101
OG0001017	AT1G41880	Atrichoblast2	1.59501	61	Solyc03g096360	MZ	1.19233	107
OG0001342	AT1G22780	Atrichoblast2	1.58856	62	Solyc03g078290	MZ	1.54521	11
OG0001342	AT1G22780	Atrichoblast2	1.58856	62	Solyc06g073370	MZ	1.38789	39
OG0000832	AT3G04400	Atrichoblast2	1.58023	63	Solyc09g090610	MZ	1.36238	45
OG0000832	AT3G04400	Atrichoblast2	1.58023	63	Solyc06g083780	MZ	1.12249	147
OG0000832	AT3G04400	Atrichoblast2	1.58023	63	Solyc06g008170	MZ	1.07282	169
OG0000832	AT3G04400	Atrichoblast2	1.58023	63	Solyc09g072865	MZ	1.06675	172
OG0000930	AT5G23740	Atrichoblast2	1.57591	65	Solyc06g073800	MZ	1.34918	50
OG0000930	AT5G23740	Atrichoblast2	1.57591	65	Solyc06g073790	MZ	1.21268	97
OG0000930	AT5G23740	Atrichoblast2	1.57591	65	Solyc12g042080	MZ	1.16341	120
OG0001423	AT1G48630	Atrichoblast2	1.57196	66	Solyc03g119040	MZ	1.39877	36
OG0001423	AT1G48630	Atrichoblast2	1.57196	66	Solyc06g069010	MZ	1.20431	100
OG0002679	AT3G02080	Atrichoblast2	1.56866	67	Solyc03g115360	MZ	1.23408	93
OG0002679	AT3G02080	Atrichoblast2	1.56866	67	Solyc12g039120	MZ	1.15839	122
OG0001185	AT3G23390	Atrichoblast2	1.56497	69	Solyc03g112850	MZ	1.25886	79
OG0001454	AT2G47610	Atrichoblast2	1.56273	70	Solyc06g064470	MZ	1.31949	59
OG0001454	AT2G47610	Atrichoblast2	1.56273	70	Solyc01g097760	MZ	1.20174	102
OG0001454	AT2G47610	Atrichoblast2	1.56273	70	Solyc06g050120	MZ	1.12933	142
OG0001378	AT1G72370	Atrichoblast2	1.55832	71	Solyc06g072120	MZ	1.25015	84
OG0001378	AT1G72370	Atrichoblast2	1.55832	71	Solyc03g019780	MZ	1.09845	159
OG0002565	AT2G36160	Atrichoblast2	1.55494	72	Solyc09g010100	MZ	1.16752	119
OG0000932	AT3G04840	Atrichoblast2	1.55392	73	Solyc06g072490	MZ	1.175	116
OG0000932	AT3G04840	Atrichoblast2	1.55392	73	Solyc09g082520	MZ	1.12408	145
OG0000932	AT3G04840	Atrichoblast2	1.55392	73	Solyc03g097900	MZ	1.10045	157
OG0002679	AT5G61170	Atrichoblast2	1.55223	74	Solyc03g115360	MZ	1.23408	93
OG0002679	AT5G61170	Atrichoblast2	1.55223	74	Solyc12g039120	MZ	1.15839	122
OG0000746	AT4G18730	Atrichoblast2	1.55009	75	Solyc12g010930	MZ	1.25206	83
OG0000746	AT4G18730	Atrichoblast2	1.55009	75	Solyc10g007980	MZ	1.18852	110
OG0000746	AT4G18730	Atrichoblast2	1.55009	75	Solyc02g086240	MZ	1.13786	136
OG0000746	AT4G18730	Atrichoblast2	1.55009	75	Solyc07g055230	MZ	1.13497	139
OG0001061	AT1G43170	Atrichoblast2	1.54954	77	Solyc01g104590	MZ	1.38949	38
OG0000924	AT2G44120	Atrichoblast2	1.5415	78	Solyc07g008370	MZ	1.29524	69
OG0003292	AT3G11940	Atrichoblast2	1.53458	79	Solyc10g078620	MZ	1.15245	125
OG0001732	AT3G14600	Atrichoblast2	1.53187	80	Solyc08g016180	MZ	1.22032	95
OG0002612	AT3G24830	Atrichoblast2	1.52266	81	Solyc05g053670	MZ	1.02117	192
OG0001017	AT3G55750	Atrichoblast2	1.52127	82	Solyc05g052810	MZ	1.20375	101
OG0001017	AT3G55750	Atrichoblast2	1.52127	82	Solyc03g096360	MZ	1.19233	107
OG0001290	AT1G57660	Atrichoblast2	1.52023	83	Solyc10g080590	MZ	1.34969	49
OG0001290	AT1G57660	Atrichoblast2	1.52023	83	Solyc10g078960	MZ	1.16859	118
OG0001954	AT3G60770	Atrichoblast2	1.51711	84	Solyc11g072260	MZ	1.41785	30
OG0001954	AT3G60770	Atrichoblast2	1.51711	84	Solyc03g083530	MZ	1.08286	163
OG0001954	AT3G60770	Atrichoblast2	1.51711	84	Solyc05g051000	MZ	1.04255	184
OG0001290	AT1G09590	Atrichoblast2	1.51701	85	Solyc10g080590	MZ	1.34969	49
OG0001290	AT1G09590	Atrichoblast2	1.51701	85	Solyc10g078960	MZ	1.16859	118
OG0001792	AT5G59850	Atrichoblast2	1.50948	86	Solyc04g150158	MZ	1.13673	137
OG0002622	AT3G05560	Atrichoblast2	1.50612	87	Solyc01g099830	MZ	1.25933	78
OG0002622	AT3G05560	Atrichoblast2	1.50612	87	Solyc09g075150	MZ	1.00726	197
OG0000377	AT2G27720	Atrichoblast2	1.50432	88	Solyc06g074430	MZ	1.38735	40
OG0000377	AT2G27720	Atrichoblast2	1.50432	88	Solyc01g009447	MZ	1.26595	75
OG0000377	AT2G27720	Atrichoblast2	1.50432	88	Solyc11g067100	MZ	1.14824	130
OG0002485	AT5G07090	Atrichoblast2	1.49987	89	Solyc02g070340	MZ	1.25357	82
OG0002658	AT3G25520	Atrichoblast2	1.49875	90	Solyc06g007670	MZ	1.13312	140
OG0002658	AT3G25520	Atrichoblast2	1.49875	90	Solyc06g082870	MZ	1.10024	158
OG0002481	AT3G56340	Atrichoblast2	1.49534	91	Solyc04g008810	MZ	1.14072	134
OG0001567	AT4G17390	Atrichoblast2	1.48766	93	Solyc06g064630	MZ	1.56689	10
OG0001567	AT4G17390	Atrichoblast2	1.48766	93	Solyc06g060400	MZ	1.39741	37
OG0001567	AT4G17390	Atrichoblast2	1.48766	93	Solyc04g008460	MZ	1.23687	91
OG0000591	AT4G10450	Atrichoblast2	1.48585	94	Solyc06g073310	MZ	1.30706	67
OG0003344	AT4G39200	Atrichoblast2	1.48183	95	Solyc02g069850	MZ	1.44199	25
OG0003344	AT4G39200	Atrichoblast2	1.48183	95	Solyc10g052660	MZ	1.06855	171
OG0002565	AT3G11510	Atrichoblast2	1.4728	96	Solyc09g010100	MZ	1.16752	119
OG0001335	AT5G09510	Atrichoblast2	1.4706	97	Solyc02g082000	MZ	1.1356	138
OG0006226	AT3G61110	Atrichoblast2	1.46487	101	Solyc01g008090	MZ	1.18214	114
OG0001374	AT1G18540	Atrichoblast2	1.45582	102	Solyc11g012110	MZ	1.29443	70
OG0001374	AT1G18540	Atrichoblast2	1.45582	102	Solyc04g014720	MZ	1.07779	166
OG0002462	AT5G02450	Atrichoblast2	1.45401	103	Solyc03g025520	MZ	1.02184	191
OG0000591	AT1G33120	Atrichoblast2	1.44806	104	Solyc06g073310	MZ	1.30706	67
OG0006060	AT2G43460	Atrichoblast2	1.44464	105	Solyc05g055640	MZ	1.10216	156
OG0002512	AT4G36130	Atrichoblast2	1.44166	106	Solyc07g063890	MZ	1.40888	32
OG0002512	AT4G36130	Atrichoblast2	1.44166	106	Solyc10g006580	MZ	1.34533	51
OG0002631	AT3G49910	Atrichoblast2	1.44043	108	Solyc02g092430	MZ	1.30634	68
OG0003292	AT2G37270	Atrichoblast2	1.43719	109	Solyc10g078620	MZ	1.15245	125
OG0003604	AT4G18100	Atrichoblast2	1.42424	111	Solyc08g006900	MZ	1.34151	53
OG0006060	AT3G59540	Atrichoblast2	1.42325	113	Solyc05g055640	MZ	1.10216	156
OG0001806	AT1G52300	Atrichoblast2	1.4162	114	Solyc03g120780	MZ	1.48125	21
OG0001806	AT1G52300	Atrichoblast2	1.4162	114	Solyc06g066660	MZ	1.40643	33
OG0000627	AT5G28060	Atrichoblast2	1.41591	115	Solyc09g065330	MZ	1.483	19
OG0000627	AT5G28060	Atrichoblast2	1.41591	115	Solyc06g084230	MZ	1.33937	54
OG0000627	AT5G28060	Atrichoblast2	1.41591	115	Solyc01g097870	MZ	1.18235	113
OG0001158	AT5G27700	Atrichoblast2	1.40895	116	Solyc01g066840	MZ	1.23937	90
OG0002614	AT3G05590	Atrichoblast2	1.40866	117	Solyc01g099900	MZ	1.31321	65
OG0002614	AT3G05590	Atrichoblast2	1.40866	117	Solyc09g075290	MZ	1.23974	89
OG0000930	AT3G48930	Atrichoblast2	1.40532	118	Solyc06g073800	MZ	1.34918	50
OG0000930	AT3G48930	Atrichoblast2	1.40532	118	Solyc06g073790	MZ	1.21268	97
OG0000930	AT3G48930	Atrichoblast2	1.40532	118	Solyc12g042080	MZ	1.16341	120
OG0003390	AT3G52590	Atrichoblast2	1.38152	124	Solyc08g008590	MZ	1.15185	126
OG0003390	AT3G52590	Atrichoblast2	1.38152	124	Solyc08g083120	MZ	1.1424	132
OG0003390	AT3G52590	Atrichoblast2	1.38152	124	Solyc01g096290	MZ	1.01906	194
OG0002288	AT2G47110	Atrichoblast2	1.38083	125	Solyc12g099025	MZ	1.26376	77
OG0002288	AT2G47110	Atrichoblast2	1.38083	125	Solyc01g068045	MZ	1.22671	94
OG0002288	AT2G47110	Atrichoblast2	1.38083	125	Solyc12g098940	MZ	1.12173	148
OG0001328	AT1G69620	Atrichoblast2	1.37778	126	Solyc05g007560	MZ	1.20657	99
OG0004675	AT5G64140	Atrichoblast2	1.37747	127	Solyc02g021400	MZ	1.25868	80
OG0001717	AT1G02780	Atrichoblast2	1.37261	128	Solyc09g075430	MZ	1.36837	42
OG0001717	AT1G02780	Atrichoblast2	1.37261	128	Solyc06g009210	MZ	1.15283	124
OG0001335	AT1G04270	Atrichoblast2	1.3657	129	Solyc02g082000	MZ	1.1356	138
OG0003540	AT3G06700	Atrichoblast2	1.34902	132	Solyc05g053440	MZ	1.32917	56
OG0001208	AT5G52650	Atrichoblast2	1.34639	133	Solyc01g099670	MZ	1.36743	44
OG0002622	AT5G27770	Atrichoblast2	1.34489	134	Solyc01g099830	MZ	1.25933	78
OG0002622	AT5G27770	Atrichoblast2	1.34489	134	Solyc09g075150	MZ	1.00726	197
OG0001759	AT2G27530	Atrichoblast2	1.34262	135	Solyc11g068420	MZ	1.06634	173
OG0000591	AT1G33140	Atrichoblast2	1.34152	136	Solyc06g073310	MZ	1.30706	67
OG0004675	AT5G03850	Atrichoblast2	1.34095	137	Solyc02g021400	MZ	1.25868	80
OG0001328	AT3G28900	Atrichoblast2	1.34075	138	Solyc05g007560	MZ	1.20657	99
OG0000056	AT5G59690	Atrichoblast2	1.32897	139	Solyc04g011390	MZ	2.04634	1
OG0000056	AT5G59690	Atrichoblast2	1.32897	139	Solyc11g072860	MZ	1.54094	12
OG0000056	AT5G59690	Atrichoblast2	1.32897	139	Solyc06g005430	MZ	1.11472	149
OG0000056	AT5G59690	Atrichoblast2	1.32897	139	Solyc06g075850	MZ	1.08021	165
OG0000056	AT5G59690	Atrichoblast2	1.32897	139	Solyc06g075930	MZ	1.07403	167
OG0000056	AT5G59690	Atrichoblast2	1.32897	139	Solyc06g075830	MZ	1.02839	189
OG0006112	AT4G29410	Atrichoblast2	1.32781	141	Solyc03g121330	MZ	1.34249	52
OG0001913	AT2G05220	Atrichoblast2	1.32744	142	Solyc05g055230	MZ	1.16098	121
OG0001913	AT2G05220	Atrichoblast2	1.32744	142	Solyc11g006690	MZ	1.11298	152
OG0001445	AT3G53870	Atrichoblast2	1.30747	145	Solyc07g041310	MZ	1.18815	111
OG0001445	AT3G53870	Atrichoblast2	1.30747	145	Solyc08g061843	MZ	1.14232	133
OG0001445	AT3G53870	Atrichoblast2	1.30747	145	Solyc08g061955	MZ	1.12931	143
OG0001913	AT5G04800	Atrichoblast2	1.30233	146	Solyc05g055230	MZ	1.16098	121
OG0001913	AT5G04800	Atrichoblast2	1.30233	146	Solyc11g006690	MZ	1.11298	152
OG0001485	AT2G09990	Atrichoblast2	1.28835	149	Solyc04g026100	MZ	1.17985	115
OG0001485	AT2G09990	Atrichoblast2	1.28835	149	Solyc01g068530	MZ	1.08659	161
OG0005539	AT1G56045	Atrichoblast2	1.28056	152	Solyc06g007210	MZ	1.40574	34
OG0005539	AT3G56020	Atrichoblast2	1.27998	153	Solyc06g007210	MZ	1.40574	34
OG0001445	AT5G35530	Atrichoblast2	1.26648	155	Solyc07g041310	MZ	1.18815	111
OG0001445	AT5G35530	Atrichoblast2	1.26648	155	Solyc08g061843	MZ	1.14232	133
OG0001445	AT5G35530	Atrichoblast2	1.26648	155	Solyc08g061955	MZ	1.12931	143
OG0001342	AT1G34030	Atrichoblast2	1.25387	158	Solyc03g078290	MZ	1.54521	11
OG0001342	AT1G34030	Atrichoblast2	1.25387	158	Solyc06g073370	MZ	1.38789	39
OG0003432	AT5G62300	Atrichoblast2	1.23863	160	Solyc01g096580	MZ	1.49924	16
OG0003432	AT5G62300	Atrichoblast2	1.23863	160	Solyc01g096590	MZ	1.2671	74
OG0001745	AT3G18740	Atrichoblast2	1.23482	161	Solyc01g009100	MZ	1.31741	61
OG0001745	AT3G18740	Atrichoblast2	1.23482	161	Solyc04g072660	MZ	1.01424	196
OG0000832	AT2G33370	Atrichoblast2	1.23292	162	Solyc09g090610	MZ	1.36238	45
OG0000832	AT2G33370	Atrichoblast2	1.23292	162	Solyc06g083780	MZ	1.12249	147
OG0000832	AT2G33370	Atrichoblast2	1.23292	162	Solyc06g008170	MZ	1.07282	169
OG0000832	AT2G33370	Atrichoblast2	1.23292	162	Solyc09g072865	MZ	1.06675	172
OG0000746	AT3G58700	Atrichoblast2	1.22574	164	Solyc12g010930	MZ	1.25206	83
OG0000746	AT3G58700	Atrichoblast2	1.22574	164	Solyc10g007980	MZ	1.18852	110
OG0000746	AT3G58700	Atrichoblast2	1.22574	164	Solyc02g086240	MZ	1.13786	136
OG0000746	AT3G58700	Atrichoblast2	1.22574	164	Solyc07g055230	MZ	1.13497	139
OG0000174	AT5G60390	Atrichoblast2	1.22091	165	Solyc06g009970	MZ	1.01684	195
OG0001208	AT4G25740	Atrichoblast2	1.21894	166	Solyc01g099670	MZ	1.36743	44
OG0004023	AT1G23290	Atrichoblast2	1.21741	167	Solyc03g112360	MZ	1.31648	62
OG0004023	AT1G23290	Atrichoblast2	1.21741	167	Solyc06g071720	MZ	1.10756	154
OG0003432	AT3G47370	Atrichoblast2	1.21127	169	Solyc01g096580	MZ	1.49924	16
OG0003432	AT3G47370	Atrichoblast2	1.21127	169	Solyc01g096590	MZ	1.2671	74
OG0001912	AT2G19750	Atrichoblast2	1.20097	170	Solyc08g076340	MZ	1.05402	181
OG0001912	AT2G19750	Atrichoblast2	1.20097	170	Solyc12g008700	MZ	1.03534	185
OG0003373	AT4G26230	Atrichoblast2	1.19881	171	Solyc05g008010	MZ	1.18987	109
OG0003373	AT4G26230	Atrichoblast2	1.19881	171	Solyc12g008720	MZ	1.08591	162
OG0002485	AT2G17360	Atrichoblast2	1.1791	174	Solyc02g070340	MZ	1.25357	82
OG0001531	AT5G02870	Atrichoblast2	1.17148	176	Solyc10g084350	MZ	1.24033	88
OG0001531	AT5G02870	Atrichoblast2	1.17148	176	Solyc10g086010	MZ	1.14259	131
OG0001531	AT5G02870	Atrichoblast2	1.17148	176	Solyc09g007250	MZ	1.09432	160
OG0001445	AT2G31610	Atrichoblast2	1.16758	177	Solyc07g041310	MZ	1.18815	111
OG0001445	AT2G31610	Atrichoblast2	1.16758	177	Solyc08g061843	MZ	1.14232	133
OG0001445	AT2G31610	Atrichoblast2	1.16758	177	Solyc08g061955	MZ	1.12931	143
OG0001912	AT4G29390	Atrichoblast2	1.16725	178	Solyc08g076340	MZ	1.05402	181
OG0001912	AT4G29390	Atrichoblast2	1.16725	178	Solyc12g008700	MZ	1.03534	185
OG0001342	AT4G09800	Atrichoblast2	1.15858	179	Solyc03g078290	MZ	1.54521	11
OG0001342	AT4G09800	Atrichoblast2	1.15858	179	Solyc06g073370	MZ	1.38789	39
OG0001158	AT3G53890	Atrichoblast2	1.15117	181	Solyc01g066840	MZ	1.23937	90
OG0003373	AT2G19740	Atrichoblast2	1.14906	182	Solyc05g008010	MZ	1.18987	109
OG0003373	AT2G19740	Atrichoblast2	1.14906	182	Solyc12g008720	MZ	1.08591	162
OG0018576	AT4G21960	Atrichoblast2	1.1474	183	Solyc02g080530	MZ	1.11459	151
OG0002481	AT2G40590	Atrichoblast2	1.1463	184	Solyc04g008810	MZ	1.14072	134
OG0002315	AT1G54690	Atrichoblast2	1.14373	185	Solyc09g082710	MZ	1.67193	4
OG0002315	AT1G54690	Atrichoblast2	1.14373	185	Solyc03g005220	MZ	1.35332	48
OG0001792	AT1G07770	Atrichoblast2	1.14015	186	Solyc04g150158	MZ	1.13673	137
OG0001290	AT1G57860	Atrichoblast2	1.13814	187	Solyc10g080590	MZ	1.34969	49
OG0001290	AT1G57860	Atrichoblast2	1.13814	187	Solyc10g078960	MZ	1.16859	118
OG0003610	AT4G31700	Atrichoblast2	1.13795	188	Solyc12g096300	MZ	1.25461	81
OG0003610	AT4G31700	Atrichoblast2	1.13795	188	Solyc08g006040	MZ	1.06049	175
OG0003610	AT4G31700	Atrichoblast2	1.13795	188	Solyc08g074240	MZ	1.01974	193
OG0000905	AT3G53430	Atrichoblast2	1.13087	191	Solyc06g075180	MZ	1.051	182
OG0003640	AT5G52470	Atrichoblast2	1.12364	193	Solyc03g025270	MZ	1.5019	15
OG0001792	AT3G46040	Atrichoblast2	1.10714	199	Solyc04g150158	MZ	1.13673	137
OG0001993	AT5G22650	Atrichoblast2	1.10419	200	Solyc09g009030	MZ	1.19977	104
OG0006036	AT2G36100	Endodermis	6.13185	1	Solyc09g010200	Exodermis2	5.46905	3
OG0003143	AT2G28670	Endodermis	5.39872	2	Solyc06g075630	Exodermis2	5.47122	2
OG0005923	AT3G55230	Endodermis	4.38173	5	Solyc04g010270	Exodermis2	3.92539	7
OG0005923	AT3G55230	Endodermis	4.38173	5	Solyc05g054780	Exodermis2	3.56691	9
OG0006036	AT3G11550	Endodermis	4.22185	7	Solyc09g010200	Exodermis2	5.46905	3
OG0004727	AT3G24020	Endodermis	3.92733	9	Solyc09g091210	Exodermis2	5.60112	1
OG0004727	AT4G13580	Endodermis	3.57365	10	Solyc09g091210	Exodermis2	5.60112	1
OG0006036	AT2G27370	Endodermis	2.99664	14	Solyc09g010200	Exodermis2	5.46905	3
OG0000426	AT3G22600	Endodermis	2.16199	27	Solyc03g005200	Exodermis2	1.85671	22
OG0000426	AT3G22600	Endodermis	2.16199	27	Solyc09g065430	Exodermis2	1.36975	37
OG0005923	AT2G39430	Endodermis	1.88733	33	Solyc04g010270	Exodermis2	3.92539	7
OG0005923	AT2G39430	Endodermis	1.88733	33	Solyc05g054780	Exodermis2	3.56691	9
OG0007683	AT1G44970	Endodermis	1.84407	37	Solyc04g080760	Exodermis2	3.87326	8
OG0001765	AT5G65020	Endodermis	1.83994	38	Solyc04g055170	Exodermis2	1.35783	38
OG0005525	AT3G20510	Endodermis	1.54567	58	Solyc10g006310	Exodermis2	0.576432	169
OG0000756	AT3G53260	Endodermis	1.5269	60	Solyc09g007900	Exodermis2	1.65508	29
OG0000756	AT3G53260	Endodermis	1.5269	60	Solyc05g056170	Exodermis2	0.681966	133
OG0000756	AT3G53260	Endodermis	1.5269	60	Solyc10g086180	Exodermis2	0.656806	140
OG0008936	AT5G21090	Endodermis	1.4733	69	Solyc10g081190	Exodermis2	1.02052	74
OG0003618	AT4G34050	Endodermis	1.30772	96	Solyc02g093270	Exodermis2	1.69613	26
OG0003618	AT4G34050	Endodermis	1.30772	96	Solyc02g093250	Exodermis2	1.37933	36
OG0006333	AT3G60450	Endodermis	1.30168	99	Solyc05g050800	Exodermis2	0.597496	162
OG0001155	AT5G28646	Endodermis	1.29635	103	Solyc09g083400	Exodermis2	1.94551	20
OG0005525	AT1G50740	Endodermis	1.27784	108	Solyc10g006310	Exodermis2	0.576432	169
OG0000756	AT2G37040	Endodermis	1.20887	127	Solyc09g007900	Exodermis2	1.65508	29
OG0000756	AT2G37040	Endodermis	1.20887	127	Solyc05g056170	Exodermis2	0.681966	133
OG0000756	AT2G37040	Endodermis	1.20887	127	Solyc10g086180	Exodermis2	0.656806	140
OG0002767	AT5G61210	Endodermis	1.2029	129	Solyc06g069570	Exodermis2	0.736866	119
OG0000813	AT1G35260	Endodermis	1.16472	134	Solyc04g150104	Exodermis2	1.15741	55
OG0002735	AT4G34920	Endodermis	1.1525	137	Solyc01g111250	Exodermis2	1.04589	70
OG0001306	AT1G13360	Endodermis	1.10766	147	Solyc04g007130	Exodermis2	0.523965	184
OG0011546	AT2G32150	Endodermis	1.02519	165	Solyc09g075890	Exodermis2	0.683634	132
OG0001735	AT1G03040	Endodermis	1.00452	170	Solyc09g065820	Exodermis2	1.0485	69
OG0006036	AT5G06200	Endodermis	0.970375	182	Solyc09g010200	Exodermis2	5.46905	3
OG0001379	AT1G72230	Endodermis	0.943388	196	Solyc04g074740	Exodermis2	2.79679	12
OG0001057	AT1G22410	Endodermis	0.934629	200	Solyc04g074480	Exodermis2	1.31259	41
OG0000492	AT3G21770	Phloem	2.96588	8	Solyc07g052510	Phloem1	3.1668	4
OG0000125	AT2G16740	Phloem	2.34923	18	Solyc10g011740	Phloem1	1.54156	33
OG0001030	AT2G02130	Phloem	2.23233	21	Solyc04g008470	Phloem1	3.33387	3
OG0001315	AT1G70670	Phloem	2.08832	23	Solyc04g007960	Phloem1	1.88025	14
OG0006399	AT3G43270	Phloem	1.7711	37	Solyc07g017600	Phloem1	2.41067	5
OG0008241	AT2G45470	Phloem	1.71074	39	Solyc01g091530	Phloem1	1.58045	30
OG0014989	AT4G14130	Phloem	1.56856	49	Solyc09g092520	Phloem1	1.28233	61
OG0000886	AT3G55370	Phloem	1.43302	61	Solyc06g076030	Phloem1	1.37294	47
OG0003457	AT3G12090	Phloem	1.35367	74	Solyc04g049080	Phloem1	1.62551	28
OG0006935	AT5G59890	Phloem	1.295	83	Solyc09g010440	Phloem1	1.36565	49
OG0001526	AT5G57110	Phloem	1.23375	96	Solyc07g008320	Phloem1	1.68834	21
OG0000287	AT3G53620	Phloem	1.22738	97	Solyc09g010380	Phloem1	2.17148	7
OG0000071	AT5G09810	Phloem	1.19892	105	Solyc05g054480	Phloem1	1.47892	37
OG0000071	AT5G09810	Phloem	1.19892	105	Solyc11g005330	Phloem1	1.18942	72
OG0002391	AT3G61820	Phloem	1.17574	108	Solyc01g096040	Phloem1	1.40299	42
OG0000560	AT3G21510	Phloem	1.15473	114	Solyc01g080540	Phloem1	0.990556	97
OG0002252	AT3G14310	Phloem	1.03281	147	Solyc03g123630	Phloem1	1.3125	56
OG0014685	AT1G32860	Phloem	1.03192	148	Solyc08g083310	Phloem1	1.33173	55
OG0008634	AT3G05910	Phloem	1.01755	153	Solyc01g102350	Phloem1	0.921312	111
OG0000258	AT1G65960	Phloem	0.973857	163	Solyc01g005000	Phloem1	1.86404	15
OG0000258	AT1G65960	Phloem	0.973857	163	Solyc11g011920	Phloem1	1.43901	40
OG0007845	AT1G33470	Phloem	0.949952	169	Solyc11g044470	Phloem1	1.38955	43
OG0000125	AT4G27960	Phloem	0.933682	177	Solyc10g011740	Phloem1	1.54156	33
OG0001973	AT3G57870	Phloem	0.905016	184	Solyc04g078620	Phloem1	1.54566	32
OG0001973	AT3G57870	Phloem	0.905016	184	Solyc03g044260	Phloem1	0.61962	198
OG0000893	AT2G13820	Phloem	0.89602	188	Solyc01g105010	Phloem1	1.19097	71
OG0001197	AT4G35300	Phloem	0.878955	198	Solyc04g082700	Phloem1	0.956544	107
OG0014923	AT3G05900	Phloem	0.874019	199	Solyc01g102310	Phloem1	1.37271	48
OG0009480	AT5G04080	Phloem	5.51506	1	Solyc04g040210	Phloem2	4.25899	5
OG0009480	AT5G04080	Phloem	5.51506	1	Solyc10g084060	Phloem2	2.27943	36
OG0000227	AT5G43380	Phloem	3.3654	5	Solyc09g090060	Phloem2	1.5937	75
OG0000492	AT3G21770	Phloem	2.96588	8	Solyc07g052510	Phloem2	2.20809	39
OG0013005	AT5G66440	Phloem	2.72091	12	Solyc02g084960	Phloem2	1.32854	118
OG0007010	AT5G53120	Phloem	2.4431	16	Solyc03g007240	Phloem2	3.41602	9
OG0000125	AT2G16740	Phloem	2.34923	18	Solyc02g083570	Phloem2	2.62839	30
OG0000125	AT2G16740	Phloem	2.34923	18	Solyc10g011740	Phloem2	1.37653	111
OG0001030	AT2G02130	Phloem	2.23233	21	Solyc04g008470	Phloem2	3.38069	10
OG0009529	AT5G54660	Phloem	2.10369	22	Solyc07g064020	Phloem2	2.36702	35
OG0001315	AT1G70670	Phloem	2.08832	23	Solyc04g007960	Phloem2	1.24028	134
OG0014628	AT1G10380	Phloem	1.90582	31	Solyc05g006700	Phloem2	3.10908	16
OG0006399	AT3G43270	Phloem	1.7711	37	Solyc07g017600	Phloem2	2.67221	28
OG0003120	AT4G19840	Phloem	1.40701	64	Solyc02g069020	Phloem2	2.69043	27
OG0003457	AT3G12090	Phloem	1.35367	74	Solyc04g049080	Phloem2	2.10624	42
OG0008283	AT2G47710	Phloem	1.33387	77	Solyc06g009050	Phloem2	1.9222	48
OG0004805	AT5G02380	Phloem	1.3236	78	Solyc09g010800	Phloem2	1.25929	130
OG0006935	AT5G59890	Phloem	1.295	83	Solyc09g010440	Phloem2	2.37929	34
OG0002755	AT4G26840	Phloem	1.26273	90	Solyc07g049360	Phloem2	2.64596	29
OG0001526	AT5G57110	Phloem	1.23375	96	Solyc07g008320	Phloem2	1.41744	106
OG0000287	AT3G53620	Phloem	1.22738	97	Solyc09g010380	Phloem2	3.1078	17
OG0004288	AT1G71692	Phloem	1.17301	110	Solyc11g032100	Phloem2	1.36358	114
OG0000560	AT3G21510	Phloem	1.15473	114	Solyc01g080540	Phloem2	1.10376	165
OG0000710	AT1G69410	Phloem	1.12074	119	Solyc12g010060	Phloem2	1.50791	88
OG0000710	AT1G69410	Phloem	1.12074	119	Solyc07g005560	Phloem2	0.974292	192
OG0001113	AT2G16600	Phloem	1.07618	136	Solyc01g111170	Phloem2	0.99964	184
OG0002266	AT4G21310	Phloem	1.04671	144	Solyc02g079940	Phloem2	2.83089	23
OG0002266	AT4G21310	Phloem	1.04671	144	Solyc07g052910	Phloem2	2.16265	41
OG0002266	AT4G21310	Phloem	1.04671	144	Solyc05g046130	Phloem2	1.30252	122
OG0002252	AT3G14310	Phloem	1.03281	147	Solyc03g123630	Phloem2	3.65328	7
OG0008634	AT3G05910	Phloem	1.01755	153	Solyc01g102350	Phloem2	2.00429	46
OG0003091	AT2G35635	Phloem	0.981806	161	Solyc10g005560	Phloem2	0.970829	193
OG0000258	AT1G65960	Phloem	0.973857	163	Solyc01g005000	Phloem2	4.43257	4
OG0000258	AT1G65960	Phloem	0.973857	163	Solyc11g011920	Phloem2	2.25143	38
OG0001113	AT4G38740	Phloem	0.960364	167	Solyc01g111170	Phloem2	0.99964	184
OG0001113	AT4G34870	Phloem	0.94359	173	Solyc01g111170	Phloem2	0.99964	184
OG0000125	AT4G27960	Phloem	0.933682	177	Solyc02g083570	Phloem2	2.62839	30
OG0000125	AT4G27960	Phloem	0.933682	177	Solyc10g011740	Phloem2	1.37653	111
OG0001973	AT3G57870	Phloem	0.905016	184	Solyc02g093110	Phloem2	1.3131	120
OG0001973	AT3G57870	Phloem	0.905016	184	Solyc04g078620	Phloem2	1.28418	127
OG0001197	AT4G35300	Phloem	0.878955	198	Solyc04g082700	Phloem2	1.34222	117
OG0001806	AT1G52300	Stele1	1.51424	19	Solyc03g120780	MZ	1.48125	21
OG0001806	AT1G52300	Stele1	1.51424	19	Solyc06g066660	MZ	1.40643	33
OG0003604	AT4G18100	Stele1	1.47188	24	Solyc08g006900	MZ	1.34151	53
OG0001173	AT5G02960	Stele1	1.41076	26	Solyc10g086020	MZ	1.4101	31
OG0001173	AT5G02960	Stele1	1.41076	26	Solyc10g084310	MZ	1.32737	57
OG0001173	AT5G02960	Stele1	1.41076	26	Solyc09g007350	MZ	1.04506	183
OG0002658	AT3G25520	Stele1	1.39415	29	Solyc06g007670	MZ	1.13312	140
OG0002658	AT3G25520	Stele1	1.39415	29	Solyc06g082870	MZ	1.10024	158
OG0002811	AT5G15200	Stele1	1.39011	30	Solyc01g010580	MZ	1.11076	153
OG0001717	AT1G02780	Stele1	1.38628	31	Solyc09g075430	MZ	1.36837	42
OG0001717	AT1G02780	Stele1	1.38628	31	Solyc06g009210	MZ	1.15283	124
OG0000627	AT5G28060	Stele1	1.38036	33	Solyc09g065330	MZ	1.483	19
OG0000627	AT5G28060	Stele1	1.38036	33	Solyc06g084230	MZ	1.33937	54
OG0000627	AT5G28060	Stele1	1.38036	33	Solyc01g097870	MZ	1.18235	113
OG0001982	AT4G15000	Stele1	1.38015	34	Solyc06g073300	MZ	1.03013	187
OG0001982	AT4G15000	Stele1	1.38015	34	Solyc07g043360	MZ	1.02985	188
OG0002565	AT2G36160	Stele1	1.36236	38	Solyc09g010100	MZ	1.16752	119
OG0001954	AT4G00100	Stele1	1.35333	41	Solyc11g072260	MZ	1.41785	30
OG0001954	AT4G00100	Stele1	1.35333	41	Solyc03g083530	MZ	1.08286	163
OG0001954	AT4G00100	Stele1	1.35333	41	Solyc05g051000	MZ	1.04255	184
OG0004023	AT1G70600	Stele1	1.33197	42	Solyc03g112360	MZ	1.31648	62
OG0004023	AT1G70600	Stele1	1.33197	42	Solyc06g071720	MZ	1.10756	154
OG0000832	AT3G04400	Stele1	1.32991	44	Solyc09g090610	MZ	1.36238	45
OG0000832	AT3G04400	Stele1	1.32991	44	Solyc06g083780	MZ	1.12249	147
OG0000832	AT3G04400	Stele1	1.32991	44	Solyc06g008170	MZ	1.07282	169
OG0000832	AT3G04400	Stele1	1.32991	44	Solyc09g072865	MZ	1.06675	172
OG0003344	AT4G39200	Stele1	1.32192	46	Solyc02g069850	MZ	1.44199	25
OG0003344	AT4G39200	Stele1	1.32192	46	Solyc10g052660	MZ	1.06855	171
OG0002612	AT3G24830	Stele1	1.31533	48	Solyc05g053670	MZ	1.02117	192
OG0001792	AT1G07770	Stele1	1.31028	49	Solyc04g150158	MZ	1.13673	137
OG0000930	AT3G48930	Stele1	1.30766	50	Solyc06g073800	MZ	1.34918	50
OG0000930	AT3G48930	Stele1	1.30766	50	Solyc06g073790	MZ	1.21268	97
OG0000930	AT3G48930	Stele1	1.30766	50	Solyc12g042080	MZ	1.16341	120
OG0000746	AT4G18730	Stele1	1.28636	53	Solyc12g010930	MZ	1.25206	83
OG0000746	AT4G18730	Stele1	1.28636	53	Solyc10g007980	MZ	1.18852	110
OG0000746	AT4G18730	Stele1	1.28636	53	Solyc02g086240	MZ	1.13786	136
OG0000746	AT4G18730	Stele1	1.28636	53	Solyc07g055230	MZ	1.13497	139
OG0001485	AT5G18380	Stele1	1.28265	54	Solyc04g026100	MZ	1.17985	115
OG0001485	AT5G18380	Stele1	1.28265	54	Solyc01g068530	MZ	1.08659	161
OG0003292	AT3G11940	Stele1	1.27777	55	Solyc10g078620	MZ	1.15245	125
OG0001732	AT2G34480	Stele1	1.27759	56	Solyc08g016180	MZ	1.22032	95
OG0002631	AT3G49910	Stele1	1.27425	57	Solyc02g092430	MZ	1.30634	68
OG0001567	AT4G17390	Stele1	1.27322	58	Solyc06g064630	MZ	1.56689	10
OG0001567	AT4G17390	Stele1	1.27322	58	Solyc06g060400	MZ	1.39741	37
OG0001567	AT4G17390	Stele1	1.27322	58	Solyc04g008460	MZ	1.23687	91
OG0001061	AT1G43170	Stele1	1.26809	59	Solyc01g104590	MZ	1.38949	38
OG0002565	AT3G11510	Stele1	1.26545	60	Solyc09g010100	MZ	1.16752	119
OG0006226	AT3G61110	Stele1	1.24869	66	Solyc01g008090	MZ	1.18214	114
OG0002614	AT5G27850	Stele1	1.22668	72	Solyc01g099900	MZ	1.31321	65
OG0002614	AT5G27850	Stele1	1.22668	72	Solyc09g075290	MZ	1.23974	89
OG0002550	AT4G27090	Stele1	1.21899	75	Solyc06g083820	MZ	1.58832	9
OG0002550	AT4G27090	Stele1	1.21899	75	Solyc09g066430	MZ	1.47548	22
OG0001342	AT4G09800	Stele1	1.2178	76	Solyc03g078290	MZ	1.54521	11
OG0001342	AT4G09800	Stele1	1.2178	76	Solyc06g073370	MZ	1.38789	39
OG0001759	AT2G27530	Stele1	1.2143	77	Solyc11g068420	MZ	1.06634	173
OG0001208	AT5G41520	Stele1	1.21179	78	Solyc01g099670	MZ	1.36743	44
OG0006060	AT3G59540	Stele1	1.21086	79	Solyc05g055640	MZ	1.10216	156
OG0001745	AT1G77940	Stele1	1.20854	82	Solyc01g009100	MZ	1.31741	61
OG0001745	AT1G77940	Stele1	1.20854	82	Solyc04g072660	MZ	1.01424	196
OG0002643	AT3G49010	Stele1	1.20431	84	Solyc08g075700	MZ	1.19111	108
OG0002462	AT5G02450	Stele1	1.19975	86	Solyc03g025520	MZ	1.02184	191
OG0001454	AT2G47610	Stele1	1.19842	89	Solyc06g064470	MZ	1.31949	59
OG0001454	AT2G47610	Stele1	1.19842	89	Solyc01g097760	MZ	1.20174	102
OG0001454	AT2G47610	Stele1	1.19842	89	Solyc06g050120	MZ	1.12933	142
OG0002288	AT2G47110	Stele1	1.19433	90	Solyc12g099025	MZ	1.26376	77
OG0002288	AT2G47110	Stele1	1.19433	90	Solyc01g068045	MZ	1.22671	94
OG0002288	AT2G47110	Stele1	1.19433	90	Solyc12g098940	MZ	1.12173	148
OG0004105	AT1G67430	Stele1	1.19363	91	Solyc06g071880	MZ	1.48176	20
OG0004105	AT1G67430	Stele1	1.19363	91	Solyc06g071870	MZ	1.31628	63
OG0000377	AT2G27710	Stele1	1.1909	93	Solyc06g074430	MZ	1.38735	40
OG0000377	AT2G27710	Stele1	1.1909	93	Solyc01g009447	MZ	1.26595	75
OG0000377	AT2G27710	Stele1	1.1909	93	Solyc11g067100	MZ	1.14824	130
OG0003610	AT4G31700	Stele1	1.17117	94	Solyc12g096300	MZ	1.25461	81
OG0003610	AT4G31700	Stele1	1.17117	94	Solyc08g006040	MZ	1.06049	175
OG0003610	AT4G31700	Stele1	1.17117	94	Solyc08g074240	MZ	1.01974	193
OG0003390	AT3G52590	Stele1	1.16296	96	Solyc08g008590	MZ	1.15185	126
OG0003390	AT3G52590	Stele1	1.16296	96	Solyc08g083120	MZ	1.1424	132
OG0003390	AT3G52590	Stele1	1.16296	96	Solyc01g096290	MZ	1.01906	194
OG0006112	AT2G19730	Stele1	1.16254	97	Solyc03g121330	MZ	1.34249	52
OG0002658	AT5G39740	Stele1	1.16101	98	Solyc06g007670	MZ	1.13312	140
OG0002658	AT5G39740	Stele1	1.16101	98	Solyc06g082870	MZ	1.10024	158
OG0002462	AT3G53740	Stele1	1.16036	99	Solyc03g025520	MZ	1.02184	191
OG0006060	AT2G43460	Stele1	1.14862	102	Solyc05g055640	MZ	1.10216	156
OG0001378	AT1G72370	Stele1	1.14799	103	Solyc06g072120	MZ	1.25015	84
OG0001378	AT1G72370	Stele1	1.14799	103	Solyc03g019780	MZ	1.09845	159
OG0001127	AT3G09200	Stele1	1.14239	105	Solyc05g054580	MZ	1.24673	85
OG0002679	AT3G02080	Stele1	1.14114	106	Solyc03g115360	MZ	1.23408	93
OG0002679	AT3G02080	Stele1	1.14114	106	Solyc12g039120	MZ	1.15839	122
OG0001454	AT3G62870	Stele1	1.13218	107	Solyc06g064470	MZ	1.31949	59
OG0001454	AT3G62870	Stele1	1.13218	107	Solyc01g097760	MZ	1.20174	102
OG0001454	AT3G62870	Stele1	1.13218	107	Solyc06g050120	MZ	1.12933	142
OG0002614	AT3G05590	Stele1	1.12798	108	Solyc01g099900	MZ	1.31321	65
OG0002614	AT3G05590	Stele1	1.12798	108	Solyc09g075290	MZ	1.23974	89
OG0002485	AT5G07090	Stele1	1.1242	110	Solyc02g070340	MZ	1.25357	82
OG0001567	AT4G16720	Stele1	1.12368	111	Solyc06g064630	MZ	1.56689	10
OG0001567	AT4G16720	Stele1	1.12368	111	Solyc06g060400	MZ	1.39741	37
OG0001567	AT4G16720	Stele1	1.12368	111	Solyc04g008460	MZ	1.23687	91
OG0003476	AT3G60245	Stele1	1.11965	113	Solyc08g077720	MZ	1.27542	71
OG0001445	AT3G53870	Stele1	1.1107	114	Solyc07g041310	MZ	1.18815	111
OG0001445	AT3G53870	Stele1	1.1107	114	Solyc08g061843	MZ	1.14232	133
OG0001445	AT3G53870	Stele1	1.1107	114	Solyc08g061955	MZ	1.12931	143
OG0001913	AT2G05220	Stele1	1.10858	115	Solyc05g055230	MZ	1.16098	121
OG0001913	AT2G05220	Stele1	1.10858	115	Solyc11g006690	MZ	1.11298	152
OG0000627	AT3G04920	Stele1	1.10753	116	Solyc09g065330	MZ	1.483	19
OG0000627	AT3G04920	Stele1	1.10753	116	Solyc06g084230	MZ	1.33937	54
OG0000627	AT3G04920	Stele1	1.10753	116	Solyc01g097870	MZ	1.18235	113
OG0002481	AT3G56340	Stele1	1.1031	117	Solyc04g008810	MZ	1.14072	134
OG0001531	AT5G02870	Stele1	1.09871	119	Solyc10g084350	MZ	1.24033	88
OG0001531	AT5G02870	Stele1	1.09871	119	Solyc10g086010	MZ	1.14259	131
OG0001531	AT5G02870	Stele1	1.09871	119	Solyc09g007250	MZ	1.09432	160
OG0001328	AT1G69620	Stele1	1.0975	120	Solyc05g007560	MZ	1.20657	99
OG0002539	AT3G09500	Stele1	1.0898	124	Solyc04g010240	MZ	1.3161	64
OG0002622	AT5G27770	Stele1	1.08756	125	Solyc01g099830	MZ	1.25933	78
OG0002622	AT5G27770	Stele1	1.08756	125	Solyc09g075150	MZ	1.00726	197
OG0002512	AT2G18020	Stele1	1.08742	126	Solyc07g063890	MZ	1.40888	32
OG0002512	AT2G18020	Stele1	1.08742	126	Solyc10g006580	MZ	1.34533	51
OG0006621	AT4G09320	Stele1	1.08344	128	Solyc01g089970	MZ	1.21657	96
OG0000377	AT2G27720	Stele1	1.06719	132	Solyc06g074430	MZ	1.38735	40
OG0000377	AT2G27720	Stele1	1.06719	132	Solyc01g009447	MZ	1.26595	75
OG0000377	AT2G27720	Stele1	1.06719	132	Solyc11g067100	MZ	1.14824	130
OG0001374	AT1G18540	Stele1	1.06569	133	Solyc11g012110	MZ	1.29443	70
OG0001374	AT1G18540	Stele1	1.06569	133	Solyc04g014720	MZ	1.07779	166
OG0001290	AT1G57660	Stele1	1.06562	134	Solyc10g080590	MZ	1.34969	49
OG0001290	AT1G57660	Stele1	1.06562	134	Solyc10g078960	MZ	1.16859	118
OG0000932	AT3G04840	Stele1	1.06559	135	Solyc06g072490	MZ	1.175	116
OG0000932	AT3G04840	Stele1	1.06559	135	Solyc09g082520	MZ	1.12408	145
OG0000932	AT3G04840	Stele1	1.06559	135	Solyc03g097900	MZ	1.10045	157
OG0001185	AT3G23390	Stele1	1.05092	143	Solyc03g112850	MZ	1.25886	79
OG0003344	AT2G21580	Stele1	1.04952	145	Solyc02g069850	MZ	1.44199	25
OG0003344	AT2G21580	Stele1	1.04952	145	Solyc10g052660	MZ	1.06855	171
OG0004023	AT1G23290	Stele1	1.04764	147	Solyc03g112360	MZ	1.31648	62
OG0004023	AT1G23290	Stele1	1.04764	147	Solyc06g071720	MZ	1.10756	154
OG0000174	AT5G60390	Stele1	1.03747	148	Solyc06g009970	MZ	1.01684	195
OG0001158	AT3G53890	Stele1	1.0287	151	Solyc01g066840	MZ	1.23937	90
OG0000924	AT2G01250	Stele1	1.02662	152	Solyc07g008370	MZ	1.29524	69
OG0003373	AT5G56710	Stele1	1.02455	155	Solyc05g008010	MZ	1.18987	109
OG0003373	AT5G56710	Stele1	1.02455	155	Solyc12g008720	MZ	1.08591	162
OG0000832	AT2G33370	Stele1	1.02282	157	Solyc09g090610	MZ	1.36238	45
OG0000832	AT2G33370	Stele1	1.02282	157	Solyc06g083780	MZ	1.12249	147
OG0000832	AT2G33370	Stele1	1.02282	157	Solyc06g008170	MZ	1.07282	169
OG0000832	AT2G33370	Stele1	1.02282	157	Solyc09g072865	MZ	1.06675	172
OG0002288	AT3G62250	Stele1	1.01919	158	Solyc12g099025	MZ	1.26376	77
OG0002288	AT3G62250	Stele1	1.01919	158	Solyc01g068045	MZ	1.22671	94
OG0002288	AT3G62250	Stele1	1.01919	158	Solyc12g098940	MZ	1.12173	148
OG0001956	AT4G33865	Stele1	1.01197	160	Solyc11g020877	MZ	1.10735	155
OG0001335	AT1G04270	Stele1	1.00812	162	Solyc02g082000	MZ	1.1356	138
OG0001342	AT1G22780	Stele1	1.00531	163	Solyc03g078290	MZ	1.54521	11
OG0001342	AT1G22780	Stele1	1.00531	163	Solyc06g073370	MZ	1.38789	39
OG0001863	AT2G39460	Stele1	1.00425	165	Solyc09g005720	MZ	1.18377	112
OG0001863	AT2G39460	Stele1	1.00425	165	Solyc10g086330	MZ	1.05471	180
OG0001342	AT1G34030	Stele1	1.00414	166	Solyc03g078290	MZ	1.54521	11
OG0001342	AT1G34030	Stele1	1.00414	166	Solyc06g073370	MZ	1.38789	39
OG0000591	AT1G33140	Stele1	1.00245	167	Solyc06g073310	MZ	1.30706	67
OG0001954	AT3G60770	Stele1	0.997574	169	Solyc11g072260	MZ	1.41785	30
OG0001954	AT3G60770	Stele1	0.997574	169	Solyc03g083530	MZ	1.08286	163
OG0001954	AT3G60770	Stele1	0.997574	169	Solyc05g051000	MZ	1.04255	184
OG0000905	AT2G37190	Stele1	0.988572	171	Solyc06g075180	MZ	1.051	182
OG0001045	AT2G41840	Stele1	0.985958	173	Solyc04g074300	MZ	1.44738	24
OG0001045	AT2G41840	Stele1	0.985958	173	Solyc04g063290	MZ	1.15154	127
OG0003540	AT3G06700	Stele1	0.978131	174	Solyc05g053440	MZ	1.32917	56
OG0000591	AT1G33120	Stele1	0.977732	175	Solyc06g073310	MZ	1.30706	67
OG0005539	AT3G56020	Stele1	0.9757	176	Solyc06g007210	MZ	1.40574	34
OG0002622	AT3G05560	Stele1	0.971547	177	Solyc01g099830	MZ	1.25933	78
OG0002622	AT3G05560	Stele1	0.971547	177	Solyc09g075150	MZ	1.00726	197
OG0000905	AT3G53430	Stele1	0.968434	179	Solyc06g075180	MZ	1.051	182
OG0002679	AT5G61170	Stele1	0.96358	182	Solyc03g115360	MZ	1.23408	93
OG0002679	AT5G61170	Stele1	0.96358	182	Solyc12g039120	MZ	1.15839	122
OG0001993	AT5G22650	Stele1	0.961238	183	Solyc09g009030	MZ	1.19977	104
OG0001017	AT3G55750	Stele1	0.956241	185	Solyc05g052810	MZ	1.20375	101
OG0001017	AT3G55750	Stele1	0.956241	185	Solyc03g096360	MZ	1.19233	107
OG0000932	AT4G34670	Stele1	0.954371	189	Solyc06g072490	MZ	1.175	116
OG0000932	AT4G34670	Stele1	0.954371	189	Solyc09g082520	MZ	1.12408	145
OG0000932	AT4G34670	Stele1	0.954371	189	Solyc03g097900	MZ	1.10045	157
OG0000930	AT5G23740	Stele1	0.947945	190	Solyc06g073800	MZ	1.34918	50
OG0000930	AT5G23740	Stele1	0.947945	190	Solyc06g073790	MZ	1.21268	97
OG0000930	AT5G23740	Stele1	0.947945	190	Solyc12g042080	MZ	1.16341	120
OG0001745	AT3G18740	Stele1	0.94281	193	Solyc01g009100	MZ	1.31741	61
OG0001745	AT3G18740	Stele1	0.94281	193	Solyc04g072660	MZ	1.01424	196
OG0002485	AT2G17360	Stele1	0.93961	194	Solyc02g070340	MZ	1.25357	82
OG0001732	AT3G14600	Stele1	0.933212	199	Solyc08g016180	MZ	1.22032	95
OG0000893	AT2G13820	Stele2	2.63506	2	Solyc01g105010	Vascular1	2.89479	7
OG0000316	AT1G77690	Stele2	2.56335	3	Solyc11g013310	Vascular1	3.24781	4
OG0000316	AT1G77690	Stele2	2.56335	3	Solyc09g014380	Vascular1	0.545053	170
OG0008127	AT2G46890	Stele2	2.22359	6	Solyc01g005320	Vascular1	3.66156	2
OG0014989	AT4G14130	Stele2	2.01186	8	Solyc09g092520	Vascular1	1.80756	25
OG0001379	AT1G72230	Stele2	1.83404	17	Solyc04g074740	Vascular1	3.20709	5
OG0008241	AT2G45470	Stele2	1.76909	18	Solyc01g091530	Vascular1	1.45816	46
OG0000756	AT2G37040	Stele2	1.7028	25	Solyc09g007920	Vascular1	1.93392	23
OG0000756	AT2G37040	Stele2	1.7028	25	Solyc10g086180	Vascular1	1.0303	74
OG0002232	AT3G25780	Stele2	1.65963	31	Solyc02g085730	Vascular1	0.700617	125
OG0005714	AT1G55330	Stele2	1.59824	38	Solyc01g005590	Vascular1	1.57933	37
OG0002232	AT3G25770	Stele2	1.57638	39	Solyc02g085730	Vascular1	0.700617	125
OG0004056	AT1G11580	Stele2	1.53144	46	Solyc02g080200	Vascular1	1.52092	41
OG0001148	AT3G52920	Stele2	1.36093	65	Solyc11g066970	Vascular1	1.68681	30
OG0000071	AT3G12110	Stele2	1.2633	83	Solyc05g054480	Vascular1	2.36332	14
OG0000071	AT3G12110	Stele2	1.2633	83	Solyc10g080500	Vascular1	1.479	42
OG0000071	AT3G12110	Stele2	1.2633	83	Solyc11g005330	Vascular1	1.2236	60
OG0000071	AT3G12110	Stele2	1.2633	83	Solyc04g011500	Vascular1	0.906141	90
OG0000071	AT3G12110	Stele2	1.2633	83	Solyc03g078400	Vascular1	0.710794	122
OG0014923	AT3G05900	Stele2	1.17704	101	Solyc01g102310	Vascular1	1.54731	39
OG0000071	AT5G09810	Stele2	1.13496	114	Solyc05g054480	Vascular1	2.36332	14
OG0000071	AT5G09810	Stele2	1.13496	114	Solyc10g080500	Vascular1	1.479	42
OG0000071	AT5G09810	Stele2	1.13496	114	Solyc11g005330	Vascular1	1.2236	60
OG0000071	AT5G09810	Stele2	1.13496	114	Solyc04g011500	Vascular1	0.906141	90
OG0000071	AT5G09810	Stele2	1.13496	114	Solyc03g078400	Vascular1	0.710794	122
OG0010945	AT1G75500	Stele2	1.11862	117	Solyc04g080940	Vascular1	4.27838	1
OG0014627	AT1G80690	Stele2	1.11615	118	Solyc03g117100	Vascular1	1.35755	53
OG0000837	AT5G43700	Stele2	1.11102	119	Solyc09g083280	Vascular1	0.667865	133
OG0006150	AT2G43680	Stele2	1.06467	129	Solyc08g014280	Vascular1	1.60536	35
OG0000416	AT1G01620	Stele2	0.975586	151	Solyc01g094690	Vascular1	2.50876	9
OG0000416	AT1G01620	Stele2	0.975586	151	Solyc12g056220	Vascular1	1.25599	57
OG0000416	AT1G01620	Stele2	0.975586	151	Solyc08g081190	Vascular1	0.809434	104
OG0018624	AT5G65670	Stele2	0.973454	152	Solyc04g076850	Vascular1	1.12163	67
OG0009540	AT5G57770	Stele2	0.938017	166	Solyc07g006320	Vascular1	2.50343	10
OG0007845	AT1G33470	Stele2	0.915469	173	Solyc11g044470	Vascular1	1.00412	79
OG0001409	AT3G59350	Stele2	0.915158	174	Solyc12g098820	Vascular1	0.935481	88
OG0004148	AT5G19440	Stele2	0.886093	191	Solyc01g008550	Vascular1	0.549645	168
OG0001148	AT2G36410	Stele2	0.869798	193	Solyc11g066970	Vascular1	1.68681	30
OG0010785	AT1G79760	Stele2	0.862842	194	Solyc03g120970	Vascular1	2.4616	12

## Sheet: ATH_Tom_Shoot
Table S2: Pairwise comparison of Arabidopsis vs Tomato shoot.
Orthogroup	ATH_MG	ATH_clusters	ATH_avg_log2FC	ATH_rank	Tom_MG	Tom_clusters	Tom_avg_log2FC	Tom_rank
OG0000088	AT2G38540	Epidermis	4.76998	1	Solyc10g075100	Epidermis1	3.72672	2
OG0000088	AT2G38540	Epidermis	4.76998	1	Solyc09g018010	Epidermis1	1.53392	63
OG0002576	AT2G42840	Epidermis	4.34271	2	Solyc07g055950	Epidermis1	3.17327	4			Note: Epidermis1 = Hair in Tomato
OG0008325	AT2G27385	Epidermis	4.07818	3	Solyc06g074260	Epidermis1	1.02607	135			Note: Epidermis2 = Nonhair in Tomato
OG0002993	AT1G09310	Epidermis	3.70549	6	Solyc01g100760	Epidermis1	2.79472	7
OG0002993	AT1G09310	Epidermis	3.70549	6	Solyc01g100750	Epidermis1	1.99534	34
OG0002993	AT1G09310	Epidermis	3.70549	6	Solyc01g100770	Epidermis1	1.18212	102
OG0008529	AT3G16370	Epidermis	3.42495	8	Solyc03g121180	Epidermis1	2.28655	20
OG0005589	AT1G27950	Epidermis	3.27963	10	Solyc05g015490	Epidermis1	1.31426	86
OG0000088	AT3G51600	Epidermis	3.12737	11	Solyc10g075100	Epidermis1	3.72672	2
OG0000088	AT3G51600	Epidermis	3.12737	11	Solyc09g018010	Epidermis1	1.53392	63
OG0000516	AT3G04290	Epidermis	2.59016	14	Solyc11g006250	Epidermis1	3.12837	5
OG0000516	AT3G04290	Epidermis	2.59016	14	Solyc04g050570	Epidermis1	2.40086	15
OG0004001	AT1G17200	Epidermis	2.40872	16	Solyc07g056040	Epidermis1	2.08028	26
OG0001322	AT1G29670	Epidermis	2.40782	17	Solyc02g071610	Epidermis1	1.92176	38
OG0001322	AT1G29670	Epidermis	2.40782	17	Solyc03g005900	Epidermis1	1.11724	117
OG0002993	AT1G56580	Epidermis	2.38999	18	Solyc01g100760	Epidermis1	2.79472	7
OG0002993	AT1G56580	Epidermis	2.38999	18	Solyc01g100750	Epidermis1	1.99534	34
OG0002993	AT1G56580	Epidermis	2.38999	18	Solyc01g100770	Epidermis1	1.18212	102
OG0004501	AT4G21620	Epidermis	2.3489	20	Solyc02g078850	Epidermis1	2.06527	28
OG0011308	AT2G26250	Epidermis	2.29905	21	Solyc08g067260	Epidermis1	1.78775	46
OG0001322	AT5G45670	Epidermis	2.19398	23	Solyc02g071610	Epidermis1	1.92176	38
OG0001322	AT5G45670	Epidermis	2.19398	23	Solyc03g005900	Epidermis1	1.11724	117
OG0012867	AT5G45950	Epidermis	1.9486	25	Solyc02g077330	Epidermis1	2.03594	30
OG0004239	AT1G72970	Epidermis	1.89766	26	Solyc06g062600	Epidermis1	1.77049	48
OG0003365	AT3G43720	Epidermis	1.82912	27	Solyc11g072030	Epidermis1	2.23406	21
OG0011246	AT1G25275	Epidermis	1.73009	30	Solyc01g104720	Epidermis1	0.987742	146
OG0000370	AT5G15230	Epidermis	1.6485	33	Solyc02g089350	Epidermis1	2.30973	18
OG0000370	AT5G15230	Epidermis	1.6485	33	Solyc06g069790	Epidermis1	2.03426	31
OG0000579	AT4G04890	Epidermis	1.63853	34	Solyc10g005330	Epidermis1	0.956408	155
OG0000579	AT4G21750	Epidermis	1.53543	35	Solyc10g005330	Epidermis1	0.956408	155
OG0000909	AT5G10480	Epidermis	1.26287	39	Solyc04g014370	Epidermis1	2.00542	33
OG0002731	AT5G57560	Epidermis	1.09085	44	Solyc03g093120	Epidermis1	1.2359	95
OG0002805	AT5G19290	Epidermis	1.03959	46	Solyc05g056000	Epidermis1	1.24301	92
OG0000723	AT3G17390	Epidermis	0.729922	61	Solyc09g008280	Epidermis1	0.839402	186
OG0002209	AT1G10670	Epidermis	0.711464	62	Solyc01g101040	Epidermis1	0.814435	190
OG0000071	AT1G49240	Epidermis	0.709239	64	Solyc10g080500	Epidermis1	1.13455	112
OG0009267	AT4G24190	Epidermis	0.60543	73	Solyc04g081570	Epidermis1	0.786829	198
OG0004006	AT1G56340	Epidermis	0.551845	86	Solyc01g100380	Epidermis1	0.99784	143
OG0000088	AT2G38540	Epidermis	4.76998	1	Solyc09g018010	Epidermis2	1.01564	19
OG0000088	AT2G38540	Epidermis	4.76998	1	Solyc10g075100	Epidermis2	0.612661	53
OG0002576	AT2G42840	Epidermis	4.34271	2	Solyc12g011010	Epidermis2	1.77413	4
OG0002576	AT2G42840	Epidermis	4.34271	2	Solyc07g055950	Epidermis2	1.03947	18
OG0008325	AT2G27385	Epidermis	4.07818	3	Solyc06g074260	Epidermis2	1.64782	6
OG0002993	AT1G09310	Epidermis	3.70549	6	Solyc01g100750	Epidermis2	1.00251	22
OG0002993	AT1G09310	Epidermis	3.70549	6	Solyc01g100760	Epidermis2	0.467136	69
OG0005589	AT1G27950	Epidermis	3.27963	10	Solyc05g015490	Epidermis2	1.20304	12
OG0000088	AT3G51600	Epidermis	3.12737	11	Solyc09g018010	Epidermis2	1.01564	19
OG0000088	AT3G51600	Epidermis	3.12737	11	Solyc10g075100	Epidermis2	0.612661	53
OG0000516	AT3G04290	Epidermis	2.59016	14	Solyc11g006250	Epidermis2	0.84246	35
OG0001322	AT1G29670	Epidermis	2.40782	17	Solyc02g071610	Epidermis2	0.954556	25
OG0002993	AT1G56580	Epidermis	2.38999	18	Solyc01g100750	Epidermis2	1.00251	22
OG0002993	AT1G56580	Epidermis	2.38999	18	Solyc01g100760	Epidermis2	0.467136	69
OG0004501	AT4G21620	Epidermis	2.3489	20	Solyc02g078850	Epidermis2	0.464142	70
OG0011308	AT2G26250	Epidermis	2.29905	21	Solyc08g067260	Epidermis2	0.787883	40
OG0001322	AT5G45670	Epidermis	2.19398	23	Solyc02g071610	Epidermis2	0.954556	25
OG0003365	AT3G43720	Epidermis	1.82912	27	Solyc11g072030	Epidermis2	0.82867	36
OG0000370	AT5G15230	Epidermis	1.6485	33	Solyc06g069790	Epidermis2	1.52929	8
OG0000579	AT4G04890	Epidermis	1.63853	34	Solyc10g005330	Epidermis2	1.89991	3
OG0000579	AT4G04890	Epidermis	1.63853	34	Solyc03g031760	Epidermis2	0.895063	31
OG0000579	AT4G21750	Epidermis	1.53543	35	Solyc10g005330	Epidermis2	1.89991	3
OG0000579	AT4G21750	Epidermis	1.53543	35	Solyc03g031760	Epidermis2	0.895063	31
OG0004717	AT3G20820	Epidermis	0.880986	54	Solyc01g086920	Epidermis2	0.526506	63
OG0000759	AT5G48810	Epidermis	0.660013	66	Solyc06g083440	Epidermis2	0.562062	57
OG0011717	AT2G24270	Epidermis	0.582414	80	Solyc07g005390	Epidermis2	0.261391	115
OG0003365	AT3G43720	Guard	2.91065	37	Solyc11g072030	Epidermis1	2.23406	21
OG0001128	AT2G04570	Guard	2.89686	39	Solyc07g049430	Epidermis1	1.52867	64
OG0007855	AT1G68530	Guard	2.81528	44	Solyc02g085870	Epidermis1	2.44235	13
OG0002993	AT1G56580	Guard	2.74696	49	Solyc01g100760	Epidermis1	2.79472	7
OG0002993	AT1G56580	Guard	2.74696	49	Solyc01g100750	Epidermis1	1.99534	34
OG0002993	AT1G56580	Guard	2.74696	49	Solyc01g100770	Epidermis1	1.18212	102
OG0001685	AT4G00360	Guard	2.59617	55	Solyc01g094750	Epidermis1	1.3962	79
OG0000160	AT3G28910	Guard	2.49522	62	Solyc02g067340	Epidermis1	1.83528	41
OG0000160	AT3G28910	Guard	2.49522	62	Solyc10g081490	Epidermis1	1.80629	45
OG0000160	AT3G28910	Guard	2.49522	62	Solyc02g087960	Epidermis1	0.996786	144
OG0003524	AT3G05880	Guard	2.46491	65	Solyc01g102290	Epidermis1	0.968187	150
OG0000160	AT1G08810	Guard	2.23913	77	Solyc02g067340	Epidermis1	1.83528	41
OG0000160	AT1G08810	Guard	2.23913	77	Solyc10g081490	Epidermis1	1.80629	45
OG0000160	AT1G08810	Guard	2.23913	77	Solyc02g087960	Epidermis1	0.996786	144
OG0000370	AT5G15230	Guard	2.09633	85	Solyc02g089350	Epidermis1	2.30973	18
OG0000370	AT5G15230	Guard	2.09633	85	Solyc06g069790	Epidermis1	2.03426	31
OG0003622	AT4G36250	Guard	1.87095	100	Solyc02g084640	Epidermis1	0.892639	169
OG0004501	AT4G21620	Guard	1.73807	109	Solyc02g078850	Epidermis1	2.06527	28
OG0011308	AT2G26250	Guard	1.59005	123	Solyc08g067260	Epidermis1	1.78775	46
OG0006034	AT2G30500	Guard	1.56212	126	Solyc08g077680	Epidermis1	0.94795	156
OG0007599	AT1G53210	Guard	1.288	142	Solyc07g062700	Epidermis1	1.59129	57
OG0005589	AT1G27950	Guard	1.14262	153	Solyc05g015490	Epidermis1	1.31426	86
OG0011246	AT1G25275	Guard	1.09238	160	Solyc01g104720	Epidermis1	0.987742	146
OG0008529	AT3G16370	Guard	1.07709	162	Solyc03g121180	Epidermis1	2.28655	20
OG0000148	AT2G34430	Mesophyll1	2.98222	1	Solyc03g005770	Mesophyll1	0.721132	8
OG0000148	AT2G34430	Mesophyll1	2.98222	1	Solyc03g005760	Mesophyll1	0.621156	17
OG0000421	AT5G38420	Mesophyll1	2.91507	2	Solyc02g085950	Mesophyll1	1.15969	1
OG0000421	AT5G38420	Mesophyll1	2.91507	2	Solyc03g034220	Mesophyll1	0.579805	21
OG0000421	AT5G38420	Mesophyll1	2.91507	2	Solyc02g063150	Mesophyll1	0.55205	23
OG0003272	AT3G27690	Mesophyll1	2.87625	3	Solyc07g047850	Mesophyll1	0.512678	33
OG0014804	AT2G45180	Mesophyll1	2.69572	6	Solyc08g074480	Mesophyll1	0.856611	3
OG0000421	AT5G38430	Mesophyll1	2.67308	7	Solyc02g085950	Mesophyll1	1.15969	1
OG0000421	AT5G38430	Mesophyll1	2.67308	7	Solyc03g034220	Mesophyll1	0.579805	21
OG0000421	AT5G38430	Mesophyll1	2.67308	7	Solyc02g063150	Mesophyll1	0.55205	23
OG0008301	AT2G26500	Mesophyll1	2.50019	10	Solyc01g109040	Mesophyll1	0.410941	56
OG0010975	AT1G30380	Mesophyll1	2.49198	11	Solyc08g006930	Mesophyll1	0.461852	45
OG0009853	AT5G64040	Mesophyll1	2.48937	12	Solyc08g013670	Mesophyll1	0.457852	46
OG0006115	AT2G46820	Mesophyll1	2.48811	13	Solyc10g005050	Mesophyll1	0.279542	145
OG0004424	AT4G28750	Mesophyll1	2.37573	17	Solyc09g063130	Mesophyll1	0.37985	75
OG0004424	AT4G28750	Mesophyll1	2.37573	17	Solyc06g083680	Mesophyll1	0.295168	136
OG0000421	AT5G38410	Mesophyll1	2.36766	18	Solyc02g085950	Mesophyll1	1.15969	1
OG0000421	AT5G38410	Mesophyll1	2.36766	18	Solyc03g034220	Mesophyll1	0.579805	21
OG0000421	AT5G38410	Mesophyll1	2.36766	18	Solyc02g063150	Mesophyll1	0.55205	23
OG0010889	AT1G08380	Mesophyll1	2.22846	21	Solyc06g074200	Mesophyll1	0.527477	29
OG0007511	AT1G12900	Mesophyll1	2.22501	23	Solyc04g009030	Mesophyll1	0.320638	123
OG0004858	AT4G05180	Mesophyll1	2.1498	25	Solyc02g079950	Mesophyll1	0.268555	150
OG0003381	AT2G39730	Mesophyll1	2.1323	26	Solyc10g086580	Mesophyll1	0.529754	27
OG0007482	AT1G55670	Mesophyll1	2.09009	27	Solyc07g066150	Mesophyll1	0.40216	63
OG0006787	AT5G54270	Mesophyll1	2.08584	28	Solyc12g011450	Mesophyll1	0.827029	5
OG0006787	AT5G54270	Mesophyll1	2.08584	28	Solyc07g063600	Mesophyll1	0.522601	30
OG0007967	AT1G79040	Mesophyll1	2.03396	30	Solyc07g066310	Mesophyll1	0.403323	62
OG0011562	AT2G06520	Mesophyll1	2.03188	31	Solyc05g025600	Mesophyll1	0.328591	115
OG0000421	AT1G67090	Mesophyll1	2.03099	32	Solyc02g085950	Mesophyll1	1.15969	1
OG0000421	AT1G67090	Mesophyll1	2.03099	32	Solyc03g034220	Mesophyll1	0.579805	21
OG0000421	AT1G67090	Mesophyll1	2.03099	32	Solyc02g063150	Mesophyll1	0.55205	23
OG0002038	AT4G01150	Mesophyll1	1.96536	35	Solyc01g095430	Mesophyll1	0.365876	85
OG0004108	AT1G03130	Mesophyll1	1.95953	37	Solyc06g054260	Mesophyll1	0.334297	110
OG0000148	AT2G34420	Mesophyll1	1.94724	38	Solyc03g005770	Mesophyll1	0.721132	8
OG0000148	AT2G34420	Mesophyll1	1.94724	38	Solyc03g005760	Mesophyll1	0.621156	17
OG0007521	AT1G70760	Mesophyll1	1.87638	40	Solyc05g026550	Mesophyll1	0.410686	57
OG0004167	AT1G61520	Mesophyll1	1.85755	42	Solyc10g007690	Mesophyll1	0.370458	83
OG0004108	AT4G02770	Mesophyll1	1.85304	43	Solyc06g054260	Mesophyll1	0.334297	110
OG0005731	AT1G15820	Mesophyll1	1.82091	46	Solyc01g105030	Mesophyll1	0.392424	68
OG0005731	AT1G15820	Mesophyll1	1.82091	46	Solyc01g105050	Mesophyll1	0.378785	78
OG0003156	AT1G52230	Mesophyll1	1.80785	47	Solyc06g066640	Mesophyll1	0.407903	59
OG0003156	AT1G52230	Mesophyll1	1.80785	47	Solyc12g044280	Mesophyll1	0.395451	66
OG0015100	AT4G37930	Mesophyll1	1.78306	50	Solyc02g091560	Mesophyll1	0.343007	101
OG0003334	AT2G21330	Mesophyll1	1.75225	52	Solyc02g084440	Mesophyll1	0.505827	35
OG0010925	AT1G21500	Mesophyll1	1.73752	54	Solyc12g019550	Mesophyll1	0.396574	65
OG0004663	AT3G47470	Mesophyll1	1.73316	56	Solyc03g115900	Mesophyll1	0.485963	41
OG0000148	AT1G29910	Mesophyll1	1.73055	57	Solyc03g005770	Mesophyll1	0.721132	8
OG0000148	AT1G29910	Mesophyll1	1.73055	57	Solyc03g005760	Mesophyll1	0.621156	17
OG0006208	AT3G61470	Mesophyll1	1.6917	60	Solyc10g006230	Mesophyll1	0.361191	90
OG0003334	AT4G38970	Mesophyll1	1.68161	61	Solyc02g084440	Mesophyll1	0.505827	35
OG0003272	AT2G05100	Mesophyll1	1.64109	64	Solyc07g047850	Mesophyll1	0.512678	33
OG0002324	AT1G31330	Mesophyll1	1.62935	67	Solyc02g069450	Mesophyll1	0.409501	58
OG0002324	AT1G31330	Mesophyll1	1.62935	67	Solyc02g069460	Mesophyll1	0.378332	79
OG0000148	AT1G29920	Mesophyll1	1.62083	70	Solyc03g005770	Mesophyll1	0.721132	8
OG0000148	AT1G29920	Mesophyll1	1.62083	70	Solyc03g005760	Mesophyll1	0.621156	17
OG0004858	AT4G21280	Mesophyll1	1.61072	71	Solyc02g079950	Mesophyll1	0.268555	150
OG0011413	AT2G39470	Mesophyll1	1.60603	73	Solyc10g054420	Mesophyll1	0.282191	142
OG0006506	AT5G01530	Mesophyll1	1.59026	74	Solyc09g014520	Mesophyll1	0.38956	70
OG0008401	AT2G10940	Mesophyll1	1.55203	79	Solyc12g009650	Mesophyll1	0.836967	4
OG0007511	AT3G26650	Mesophyll1	1.53645	81	Solyc04g009030	Mesophyll1	0.320638	123
OG0005747	AT1G67740	Mesophyll1	1.53605	82	Solyc10g077120	Mesophyll1	0.462173	44
OG0003156	AT3G16140	Mesophyll1	1.53263	84	Solyc06g066640	Mesophyll1	0.407903	59
OG0003156	AT3G16140	Mesophyll1	1.53263	84	Solyc12g044280	Mesophyll1	0.395451	66
OG0002009	AT4G22890	Mesophyll1	1.50915	89	Solyc08g080050	Mesophyll1	0.250928	157
OG0006506	AT3G08940	Mesophyll1	1.47023	96	Solyc09g014520	Mesophyll1	0.38956	70
OG0003272	AT2G05070	Mesophyll1	1.4168	104	Solyc07g047850	Mesophyll1	0.512678	33
OG0000148	AT1G29930	Mesophyll1	1.37924	114	Solyc03g005770	Mesophyll1	0.721132	8
OG0000148	AT1G29930	Mesophyll1	1.37924	114	Solyc03g005760	Mesophyll1	0.621156	17
OG0013311	ATCG00470	Mesophyll1	1.34414	120	Solyc01g017220	Mesophyll1	0.399866	64
OG0004424	AT2G20260	Mesophyll1	1.27452	135	Solyc09g063130	Mesophyll1	0.37985	75
OG0004424	AT2G20260	Mesophyll1	1.27452	135	Solyc06g083680	Mesophyll1	0.295168	136
OG0012820	AT5G61410	Mesophyll1	1.27194	136	Solyc03g115820	Mesophyll1	0.31712	124
OG0007952	AT1G06680	Mesophyll1	1.22408	146	Solyc07g044860	Mesophyll1	0.33501	109
OG0000502	AT1G03680	Mesophyll1	1.19868	151	Solyc12g013810	Mesophyll1	0.332446	114
OG0006493	AT3G27160	Mesophyll1	1.1578	160	Solyc02g068090	Mesophyll1	0.348992	99
OG0002213	AT1G60950	Mesophyll1	1.12338	169	Solyc10g044520	Mesophyll1	0.639601	14
OG0012628	AT4G25050	Mesophyll1	1.10906	172	Solyc03g118410	Mesophyll1	0.544955	25
OG0010552	AT1G74730	Mesophyll1	1.10852	173	Solyc03g113240	Mesophyll1	0.259817	155
OG0009500	AT5G02160	Mesophyll1	0.997216	197	Solyc10g086570	Mesophyll1	0.352098	97
OG0000148	AT2G34430	Mesophyll1	2.98222	1	Solyc03g005770	Mesophyll2	0.581877	58
OG0000421	AT5G38420	Mesophyll1	2.91507	2	Solyc03g034220	Mesophyll2	0.423778	107
OG0000421	AT5G38420	Mesophyll1	2.91507	2	Solyc02g063150	Mesophyll2	0.365587	153
OG0003272	AT3G27690	Mesophyll1	2.87625	3	Solyc07g047850	Mesophyll2	0.401628	125
OG0000421	AT5G38430	Mesophyll1	2.67308	7	Solyc03g034220	Mesophyll2	0.423778	107
OG0000421	AT5G38430	Mesophyll1	2.67308	7	Solyc02g063150	Mesophyll2	0.365587	153
OG0008301	AT2G26500	Mesophyll1	2.50019	10	Solyc01g109040	Mesophyll2	0.393514	130
OG0000421	AT5G38410	Mesophyll1	2.36766	18	Solyc03g034220	Mesophyll2	0.423778	107
OG0000421	AT5G38410	Mesophyll1	2.36766	18	Solyc02g063150	Mesophyll2	0.365587	153
OG0010889	AT1G08380	Mesophyll1	2.22846	21	Solyc06g074200	Mesophyll2	0.330192	178
OG0004858	AT4G05180	Mesophyll1	2.1498	25	Solyc02g079950	Mesophyll2	0.358855	157
OG0003381	AT2G39730	Mesophyll1	2.1323	26	Solyc10g086580	Mesophyll2	0.328979	179
OG0006787	AT5G54270	Mesophyll1	2.08584	28	Solyc07g063600	Mesophyll2	0.932387	28
OG0006787	AT5G54270	Mesophyll1	2.08584	28	Solyc12g011450	Mesophyll2	0.399284	127
OG0000421	AT1G67090	Mesophyll1	2.03099	32	Solyc03g034220	Mesophyll2	0.423778	107
OG0000421	AT1G67090	Mesophyll1	2.03099	32	Solyc02g063150	Mesophyll2	0.365587	153
OG0002038	AT4G01150	Mesophyll1	1.96536	35	Solyc01g095430	Mesophyll2	0.400543	126
OG0000148	AT2G34420	Mesophyll1	1.94724	38	Solyc03g005770	Mesophyll2	0.581877	58
OG0007521	AT1G70760	Mesophyll1	1.87638	40	Solyc05g026550	Mesophyll2	0.446032	97
OG0004167	AT1G61520	Mesophyll1	1.85755	42	Solyc10g007690	Mesophyll2	0.316898	190
OG0003156	AT1G52230	Mesophyll1	1.80785	47	Solyc06g066640	Mesophyll2	0.577529	59
OG0003156	AT1G52230	Mesophyll1	1.80785	47	Solyc12g044280	Mesophyll2	0.412568	116
OG0003334	AT2G21330	Mesophyll1	1.75225	52	Solyc02g084440	Mesophyll2	0.3668	151
OG0004663	AT3G47470	Mesophyll1	1.73316	56	Solyc03g115900	Mesophyll2	0.390403	132
OG0000148	AT1G29910	Mesophyll1	1.73055	57	Solyc03g005770	Mesophyll2	0.581877	58
OG0006208	AT3G61470	Mesophyll1	1.6917	60	Solyc10g006230	Mesophyll2	0.478873	84
OG0003334	AT4G38970	Mesophyll1	1.68161	61	Solyc02g084440	Mesophyll2	0.3668	151
OG0003272	AT2G05100	Mesophyll1	1.64109	64	Solyc07g047850	Mesophyll2	0.401628	125
OG0002324	AT1G31330	Mesophyll1	1.62935	67	Solyc02g069450	Mesophyll2	0.407477	120
OG0002324	AT1G31330	Mesophyll1	1.62935	67	Solyc02g069460	Mesophyll2	0.304923	197
OG0000148	AT1G29920	Mesophyll1	1.62083	70	Solyc03g005770	Mesophyll2	0.581877	58
OG0004858	AT4G21280	Mesophyll1	1.61072	71	Solyc02g079950	Mesophyll2	0.358855	157
OG0009040	AT4G03280	Mesophyll1	1.6084	72	Solyc12g005630	Mesophyll2	0.362189	155
OG0011413	AT2G39470	Mesophyll1	1.60603	73	Solyc10g054420	Mesophyll2	0.53857	72
OG0000486	AT4G35090	Mesophyll1	1.58049	75	Solyc12g094620	Mesophyll2	0.562784	65
OG0006356	AT3G55800	Mesophyll1	1.55812	77	Solyc05g052600	Mesophyll2	0.317304	189
OG0008401	AT2G10940	Mesophyll1	1.55203	79	Solyc12g009650	Mesophyll2	0.377589	143
OG0003156	AT3G16140	Mesophyll1	1.53263	84	Solyc06g066640	Mesophyll2	0.577529	59
OG0003156	AT3G16140	Mesophyll1	1.53263	84	Solyc12g044280	Mesophyll2	0.412568	116
OG0012197	AT3G54890	Mesophyll1	1.44685	100	Solyc05g056050	Mesophyll2	0.475425	86
OG0003272	AT2G05070	Mesophyll1	1.4168	104	Solyc07g047850	Mesophyll2	0.401628	125
OG0000148	AT1G29930	Mesophyll1	1.37924	114	Solyc03g005770	Mesophyll2	0.581877	58
OG0009131	AT4G09010	Mesophyll1	1.02229	194	Solyc04g074640	Mesophyll2	0.426158	106
OG0002834	ATCG00040	Mesophyll2	1.54731	1	Solyc09g061390	Mesophyll1	0.489975	40
OG0003557	AT3G27850	Mesophyll2	1.20326	10	Solyc02g086730	Mesophyll1	0.375701	80
OG0006478	AT3G15190	Mesophyll2	1.11676	12	Solyc07g062870	Mesophyll1	0.278423	146
OG0008397	AT2G28000	Mesophyll2	1.09536	14	Solyc11g069790	Mesophyll1	0.298182	134
OG0003689	AT5G20720	Mesophyll2	1.06607	19	Solyc07g042250	Mesophyll1	0.289237	137
OG0003557	AT3G27830	Mesophyll2	1.03898	23	Solyc02g086730	Mesophyll1	0.375701	80
OG0010981	AT1G75350	Mesophyll2	1.02032	26	Solyc04g080630	Mesophyll1	0.420903	52
OG0007988	AT1G32990	Mesophyll2	1.0039	27	Solyc08g083350	Mesophyll1	0.321472	122
OG0003243	AT2G37660	Mesophyll2	0.96917	30	Solyc09g010930	Mesophyll1	0.356434	92
OG0007733	AT1G05190	Mesophyll2	0.960958	32	Solyc12g100160	Mesophyll1	0.298359	133
OG0005542	AT1G79850	Mesophyll2	0.950949	35	Solyc03g120630	Mesophyll1	0.342764	102
OG0011439	AT2G24090	Mesophyll2	0.944676	40	Solyc07g006000	Mesophyll1	0.33791	107
OG0005633	AT1G35680	Mesophyll2	0.930331	45	Solyc06g065390	Mesophyll1	0.304381	130
OG0010781	AT1G29070	Mesophyll2	0.923297	47	Solyc01g056780	Mesophyll1	0.340455	104
OG0006751	AT5G08280	Mesophyll2	0.915471	49	Solyc07g066470	Mesophyll1	0.310137	128
OG0007421	AT1G09750	Mesophyll2	0.910715	51	Solyc12g087940	Mesophyll1	0.716976	9
OG0008401	AT2G10940	Mesophyll2	0.897424	56	Solyc12g009650	Mesophyll1	0.836967	4
OG0011741	AT3G44890	Mesophyll2	0.877048	61	Solyc11g066410	Mesophyll1	0.277173	147
OG0007020	ATCG00740	Mesophyll2	0.87629	62	Solyc01g017440	Mesophyll1	0.430097	48
OG0006744	AT5G30510	Mesophyll2	0.871233	64	Solyc01g057830	Mesophyll1	0.314214	126
OG0006025	AT2G38140	Mesophyll2	0.850085	69	Solyc05g052710	Mesophyll1	0.354909	95
OG0006888	AT5G63310	Mesophyll2	0.833777	71	Solyc06g071960	Mesophyll1	0.316216	125
OG0009162	AT5G47190	Mesophyll2	0.833342	72	Solyc08g078010	Mesophyll1	0.419402	53
OG0000148	AT1G29920	Mesophyll2	0.799948	77	Solyc03g005770	Mesophyll1	0.721132	8
OG0000148	AT1G29920	Mesophyll2	0.799948	77	Solyc03g005760	Mesophyll1	0.621156	17
OG0009162	AT4G17560	Mesophyll2	0.785244	82	Solyc08g078010	Mesophyll1	0.419402	53
OG0000148	AT1G29910	Mesophyll2	0.773302	87	Solyc03g005770	Mesophyll1	0.721132	8
OG0000148	AT1G29910	Mesophyll2	0.773302	87	Solyc03g005760	Mesophyll1	0.621156	17
OG0004917	AT4G17600	Mesophyll2	0.747945	92	Solyc08g077880	Mesophyll1	0.324912	119
OG0006493	AT3G27160	Mesophyll2	0.728119	98	Solyc02g068090	Mesophyll1	0.348992	99
OG0007508	AT1G44575	Mesophyll2	0.720006	100	Solyc06g060340	Mesophyll1	0.323069	121
OG0002213	AT1G10960	Mesophyll2	0.630962	137	Solyc10g044520	Mesophyll1	0.639601	14
OG0012628	AT4G25050	Mesophyll2	0.600415	164	Solyc03g118410	Mesophyll1	0.544955	25
OG0002550	AT2G20450	Mesophyll2	0.673581	123	Solyc06g008260	MZ1	0.277416	128
OG0003610	AT4G31700	Mesophyll2	0.662856	127	Solyc12g096300	MZ1	0.256815	162
OG0002485	AT5G07090	Mesophyll2	0.653824	128	Solyc02g070330	MZ1	0.304738	104
OG0003344	AT4G39200	Mesophyll2	0.649421	129	Solyc02g069850	MZ1	0.267492	147
OG0002631	AT3G49910	Mesophyll2	0.630532	138	Solyc03g044000	MZ1	0.250475	171
OG0001454	AT2G47610	Mesophyll2	0.628885	139	Solyc01g097760	MZ1	0.344459	79
OG0001208	AT5G52650	Mesophyll2	0.622	142	Solyc12g096540	MZ1	0.402194	61
OG0001208	AT5G52650	Mesophyll2	0.622	142	Solyc01g099670	MZ1	0.313229	97
OG0002679	AT5G61170	Mesophyll2	0.619499	143	Solyc12g039120	MZ1	0.276559	131
OG0004105	AT1G27400	Mesophyll2	0.611052	151	Solyc06g071880	MZ1	0.250358	172
OG0001127	AT3G09200	Mesophyll2	0.607353	156	Solyc05g054580	MZ1	0.323511	87
OG0000832	AT1G04480	Mesophyll2	0.59661	167	Solyc09g090610	MZ1	0.308316	102
OG0001045	AT2G41840	Mesophyll2	0.587225	175	Solyc04g063290	MZ1	0.317938	91
OG0001717	AT1G02780	Mesophyll2	0.583358	179	Solyc06g009210	MZ1	0.25541	166
OG0001342	AT1G22780	Mesophyll2	0.579112	181	Solyc03g078290	MZ1	0.28509	120
OG0001301	AT2G32060	Mesophyll2	0.576779	183	Solyc12g042650	MZ1	0.294322	113
OG0001982	AT4G15000	Mesophyll2	0.571787	187	Solyc06g073300	MZ1	0.271487	143
OG0002539	AT3G09500	Mesophyll2	0.570128	191	Solyc04g010240	MZ1	0.326993	85
OG0001485	AT5G18380	Mesophyll2	0.567384	193	Solyc05g005690	MZ1	0.363056	72
OG0001173	AT5G02960	Mesophyll2	0.561899	200	Solyc10g084310	MZ1	0.301595	106
OG0008401	AT2G10940	Mesophyll3	1.36051	1	Solyc12g009650	Mesophyll1	0.836967	4
OG0000148	AT1G29910	Mesophyll3	1.02462	8	Solyc03g005770	Mesophyll1	0.721132	8
OG0000148	AT1G29910	Mesophyll3	1.02462	8	Solyc03g005760	Mesophyll1	0.621156	17
OG0000421	AT5G38410	Mesophyll3	0.945259	12	Solyc02g085950	Mesophyll1	1.15969	1
OG0000421	AT5G38410	Mesophyll3	0.945259	12	Solyc03g034220	Mesophyll1	0.579805	21
OG0000421	AT5G38410	Mesophyll3	0.945259	12	Solyc02g063150	Mesophyll1	0.55205	23
OG0000148	AT1G29920	Mesophyll3	0.909793	14	Solyc03g005770	Mesophyll1	0.721132	8
OG0000148	AT1G29920	Mesophyll3	0.909793	14	Solyc03g005760	Mesophyll1	0.621156	17
OG0010781	AT1G29070	Mesophyll3	0.880908	16	Solyc01g056780	Mesophyll1	0.340455	104
OG0011439	AT2G24090	Mesophyll3	0.87593	18	Solyc07g006000	Mesophyll1	0.33791	107
OG0007421	AT1G09750	Mesophyll3	0.854671	19	Solyc12g087940	Mesophyll1	0.716976	9
OG0010981	AT1G75350	Mesophyll3	0.823542	21	Solyc04g080630	Mesophyll1	0.420903	52
OG0006025	AT2G38140	Mesophyll3	0.805931	26	Solyc05g052710	Mesophyll1	0.354909	95
OG0007508	AT1G44575	Mesophyll3	0.782724	29	Solyc06g060340	Mesophyll1	0.323069	121
OG0004424	AT2G20260	Mesophyll3	0.767753	32	Solyc09g063130	Mesophyll1	0.37985	75
OG0004424	AT2G20260	Mesophyll3	0.767753	32	Solyc06g083680	Mesophyll1	0.295168	136
OG0006493	AT3G27160	Mesophyll3	0.765861	33	Solyc02g068090	Mesophyll1	0.348992	99
OG0000421	AT1G67090	Mesophyll3	0.73996	44	Solyc02g085950	Mesophyll1	1.15969	1
OG0000421	AT1G67090	Mesophyll3	0.73996	44	Solyc03g034220	Mesophyll1	0.579805	21
OG0000421	AT1G67090	Mesophyll3	0.73996	44	Solyc02g063150	Mesophyll1	0.55205	23
OG0005542	AT1G79850	Mesophyll3	0.717852	49	Solyc03g120630	Mesophyll1	0.342764	102
OG0012628	AT4G25050	Mesophyll3	0.716431	51	Solyc03g118410	Mesophyll1	0.544955	25
OG0009519	AT5G35630	Mesophyll3	0.707943	56	Solyc01g080280	Mesophyll1	0.365566	86
OG0000148	AT2G34430	Mesophyll3	0.703189	57	Solyc03g005770	Mesophyll1	0.721132	8
OG0000148	AT2G34430	Mesophyll3	0.703189	57	Solyc03g005760	Mesophyll1	0.621156	17
OG0003557	AT3G27830	Mesophyll3	0.698292	60	Solyc02g086730	Mesophyll1	0.375701	80
OG0011741	AT3G44890	Mesophyll3	0.695224	61	Solyc11g066410	Mesophyll1	0.277173	147
OG0004858	AT4G21280	Mesophyll3	0.692834	62	Solyc02g079950	Mesophyll1	0.268555	150
OG0007988	AT1G32990	Mesophyll3	0.68948	63	Solyc08g083350	Mesophyll1	0.321472	122
OG0007733	AT1G05190	Mesophyll3	0.684001	65	Solyc12g100160	Mesophyll1	0.298359	133
OG0002324	AT1G31330	Mesophyll3	0.682892	66	Solyc02g069450	Mesophyll1	0.409501	58
OG0002324	AT1G31330	Mesophyll3	0.682892	66	Solyc02g069460	Mesophyll1	0.378332	79
OG0003381	AT2G39730	Mesophyll3	0.680691	70	Solyc10g086580	Mesophyll1	0.529754	27
OG0003597	AT4G12800	Mesophyll3	0.680283	71	Solyc06g082940	Mesophyll1	0.426199	51
OG0003597	AT4G12800	Mesophyll3	0.680283	71	Solyc06g082950	Mesophyll1	0.379586	76
OG0003156	AT3G16140	Mesophyll3	0.673982	73	Solyc06g066640	Mesophyll1	0.407903	59
OG0003156	AT3G16140	Mesophyll3	0.673982	73	Solyc12g044280	Mesophyll1	0.395451	66
OG0004049	AT1G32470	Mesophyll3	0.669775	74	Solyc08g007040	Mesophyll1	0.587376	20
OG0004049	AT1G32470	Mesophyll3	0.669775	74	Solyc06g061070	Mesophyll1	0.333308	112
OG0003334	AT4G38970	Mesophyll3	0.669108	76	Solyc02g084440	Mesophyll1	0.505827	35
OG0005633	AT1G35680	Mesophyll3	0.669084	77	Solyc06g065390	Mesophyll1	0.304381	130
OG0006208	AT3G61470	Mesophyll3	0.666515	78	Solyc10g006230	Mesophyll1	0.361191	90
OG0004663	AT3G47470	Mesophyll3	0.666028	79	Solyc03g115900	Mesophyll1	0.485963	41
OG0009162	AT5G47190	Mesophyll3	0.662983	81	Solyc08g078010	Mesophyll1	0.419402	53
OG0007482	AT1G55670	Mesophyll3	0.661135	82	Solyc07g066150	Mesophyll1	0.40216	63
OG0003272	AT2G05070	Mesophyll3	0.650091	89	Solyc07g047850	Mesophyll1	0.512678	33
OG0006478	AT3G15190	Mesophyll3	0.638146	97	Solyc07g062870	Mesophyll1	0.278423	146
OG0009162	AT4G17560	Mesophyll3	0.634221	100	Solyc08g078010	Mesophyll1	0.419402	53
OG0003156	AT1G52230	Mesophyll3	0.628902	101	Solyc06g066640	Mesophyll1	0.407903	59
OG0003156	AT1G52230	Mesophyll3	0.628902	101	Solyc12g044280	Mesophyll1	0.395451	66
OG0006506	AT5G01530	Mesophyll3	0.624916	105	Solyc09g014520	Mesophyll1	0.38956	70
OG0007511	AT3G26650	Mesophyll3	0.619937	107	Solyc04g009030	Mesophyll1	0.320638	123
OG0010889	AT1G08380	Mesophyll3	0.619238	108	Solyc06g074200	Mesophyll1	0.527477	29
OG0003557	AT3G27850	Mesophyll3	0.618839	109	Solyc02g086730	Mesophyll1	0.375701	80
OG0000148	AT1G29930	Mesophyll3	0.616572	111	Solyc03g005770	Mesophyll1	0.721132	8
OG0000148	AT1G29930	Mesophyll3	0.616572	111	Solyc03g005760	Mesophyll1	0.621156	17
OG0001951	AT3G18080	Mesophyll3	0.609344	114	Solyc03g119080	Mesophyll1	0.429464	49
OG0006355	AT5G13140	Mesophyll3	0.609341	115	Solyc02g094330	Mesophyll1	0.356384	94
OG0010975	AT1G30380	Mesophyll3	0.606433	117	Solyc08g006930	Mesophyll1	0.461852	45
OG0006744	AT5G30510	Mesophyll3	0.60255	122	Solyc01g057830	Mesophyll1	0.314214	126
OG0000502	AT3G15360	Mesophyll3	0.601626	123	Solyc12g013810	Mesophyll1	0.332446	114
OG0006506	AT3G08940	Mesophyll3	0.601283	124	Solyc09g014520	Mesophyll1	0.38956	70
OG0009853	AT5G64040	Mesophyll3	0.596013	126	Solyc08g013670	Mesophyll1	0.457852	46
OG0009500	AT5G02160	Mesophyll3	0.592971	129	Solyc10g086570	Mesophyll1	0.352098	97
OG0006751	AT5G08280	Mesophyll3	0.589966	131	Solyc07g066470	Mesophyll1	0.310137	128
OG0007967	AT1G79040	Mesophyll3	0.589787	132	Solyc07g066310	Mesophyll1	0.403323	62
OG0004167	AT1G61520	Mesophyll3	0.587039	134	Solyc10g007690	Mesophyll1	0.370458	83
OG0004049	AT2G35370	Mesophyll3	0.554614	148	Solyc08g007040	Mesophyll1	0.587376	20
OG0004049	AT2G35370	Mesophyll3	0.554614	148	Solyc06g061070	Mesophyll1	0.333308	112
OG0007511	AT1G12900	Mesophyll3	0.554412	149	Solyc04g009030	Mesophyll1	0.320638	123
OG0004858	AT4G05180	Mesophyll3	0.554017	150	Solyc02g079950	Mesophyll1	0.268555	150
OG0010925	AT1G21500	Mesophyll3	0.553449	151	Solyc12g019550	Mesophyll1	0.396574	65
OG0015100	AT4G37930	Mesophyll3	0.544391	156	Solyc02g091560	Mesophyll1	0.343007	101
OG0000502	AT1G03680	Mesophyll3	0.542895	158	Solyc12g013810	Mesophyll1	0.332446	114
OG0002038	AT4G01150	Mesophyll3	0.537784	162	Solyc01g095430	Mesophyll1	0.365876	85
OG0012820	AT5G61410	Mesophyll3	0.535117	163	Solyc03g115820	Mesophyll1	0.31712	124
OG0005747	AT1G67740	Mesophyll3	0.525099	170	Solyc10g077120	Mesophyll1	0.462173	44
OG0006787	AT5G54270	Mesophyll3	0.517265	172	Solyc12g011450	Mesophyll1	0.827029	5
OG0006787	AT5G54270	Mesophyll3	0.517265	172	Solyc07g063600	Mesophyll1	0.522601	30
OG0013311	ATCG00470	Mesophyll3	0.509178	177	Solyc01g017220	Mesophyll1	0.399866	64
OG0003272	AT2G05100	Mesophyll3	0.507884	180	Solyc07g047850	Mesophyll1	0.512678	33
OG0005731	AT1G15820	Mesophyll3	0.507596	182	Solyc01g105030	Mesophyll1	0.392424	68
OG0005731	AT1G15820	Mesophyll3	0.507596	182	Solyc01g105050	Mesophyll1	0.378785	78
OG0009610	AT5G13630	Mesophyll3	0.503766	188	Solyc04g015750	Mesophyll1	0.332595	113
OG0007020	ATCG00740	Mesophyll3	0.503733	189	Solyc01g017440	Mesophyll1	0.430097	48
OG0011562	AT2G06520	Mesophyll3	0.500057	193	Solyc05g025600	Mesophyll1	0.328591	115
OG0008401	AT2G10940	Mesophyll3	1.36051	1	Solyc12g009650	Mesophyll2	0.377589	143
OG0001030	AT2G02100	Mesophyll3	1.13126	6	Solyc07g007750	Mesophyll2	1.35115	17
OG0000148	AT1G29910	Mesophyll3	1.02462	8	Solyc03g005770	Mesophyll2	0.581877	58
OG0000421	AT5G38410	Mesophyll3	0.945259	12	Solyc03g034220	Mesophyll2	0.423778	107
OG0000421	AT5G38410	Mesophyll3	0.945259	12	Solyc02g063150	Mesophyll2	0.365587	153
OG0003042	AT4G02380	Mesophyll3	0.913217	13	Solyc06g009140	Mesophyll2	1.80162	10
OG0000148	AT1G29920	Mesophyll3	0.909793	14	Solyc03g005770	Mesophyll2	0.581877	58
OG0008136	AT2G06925	Mesophyll3	0.877868	17	Solyc07g014730	Mesophyll2	0.342342	169
OG0007421	AT1G09750	Mesophyll3	0.854671	19	Solyc12g087940	Mesophyll2	0.5641	63
OG0011246	AT1G25275	Mesophyll3	0.813676	24	Solyc01g104720	Mesophyll2	0.304881	198
OG0000421	AT1G67090	Mesophyll3	0.73996	44	Solyc03g034220	Mesophyll2	0.423778	107
OG0000421	AT1G67090	Mesophyll3	0.73996	44	Solyc02g063150	Mesophyll2	0.365587	153
OG0012197	AT3G54890	Mesophyll3	0.714487	54	Solyc05g056050	Mesophyll2	0.475425	86
OG0009040	AT4G03280	Mesophyll3	0.708595	55	Solyc12g005630	Mesophyll2	0.362189	155
OG0000148	AT2G34430	Mesophyll3	0.703189	57	Solyc03g005770	Mesophyll2	0.581877	58
OG0008751	AT3G54400	Mesophyll3	0.703151	58	Solyc01g096450	Mesophyll2	0.372393	149
OG0004858	AT4G21280	Mesophyll3	0.692834	62	Solyc02g079950	Mesophyll2	0.358855	157
OG0002324	AT1G31330	Mesophyll3	0.682892	66	Solyc02g069450	Mesophyll2	0.407477	120
OG0002324	AT1G31330	Mesophyll3	0.682892	66	Solyc02g069460	Mesophyll2	0.304923	197
OG0003381	AT2G39730	Mesophyll3	0.680691	70	Solyc10g086580	Mesophyll2	0.328979	179
OG0003597	AT4G12800	Mesophyll3	0.680283	71	Solyc06g082950	Mesophyll2	0.356298	158
OG0003597	AT4G12800	Mesophyll3	0.680283	71	Solyc06g082940	Mesophyll2	0.320502	187
OG0003156	AT3G16140	Mesophyll3	0.673982	73	Solyc06g066640	Mesophyll2	0.577529	59
OG0003156	AT3G16140	Mesophyll3	0.673982	73	Solyc12g044280	Mesophyll2	0.412568	116
OG0003334	AT4G38970	Mesophyll3	0.669108	76	Solyc02g084440	Mesophyll2	0.3668	151
OG0006208	AT3G61470	Mesophyll3	0.666515	78	Solyc10g006230	Mesophyll2	0.478873	84
OG0004663	AT3G47470	Mesophyll3	0.666028	79	Solyc03g115900	Mesophyll2	0.390403	132
OG0003272	AT2G05070	Mesophyll3	0.650091	89	Solyc07g047850	Mesophyll2	0.401628	125
OG0003156	AT1G52230	Mesophyll3	0.628902	101	Solyc06g066640	Mesophyll2	0.577529	59
OG0003156	AT1G52230	Mesophyll3	0.628902	101	Solyc12g044280	Mesophyll2	0.412568	116
OG0010889	AT1G08380	Mesophyll3	0.619238	108	Solyc06g074200	Mesophyll2	0.330192	178
OG0000148	AT1G29930	Mesophyll3	0.616572	111	Solyc03g005770	Mesophyll2	0.581877	58
OG0001951	AT3G18080	Mesophyll3	0.609344	114	Solyc03g119080	Mesophyll2	0.33865	171
OG0006355	AT5G13140	Mesophyll3	0.609341	115	Solyc02g094330	Mesophyll2	0.345271	168
OG0008732	AT3G56940	Mesophyll3	0.605774	119	Solyc10g077040	Mesophyll2	0.449198	95
OG0001695	AT1G59870	Mesophyll3	0.589426	133	Solyc03g120980	Mesophyll2	0.914258	30
OG0004167	AT1G61520	Mesophyll3	0.587039	134	Solyc10g007690	Mesophyll2	0.316898	190
OG0004805	AT3G09390	Mesophyll3	0.573278	141	Solyc09g010800	Mesophyll2	0.349326	164
OG0009131	AT4G09010	Mesophyll3	0.56164	143	Solyc04g074640	Mesophyll2	0.426158	106
OG0004858	AT4G05180	Mesophyll3	0.554017	150	Solyc02g079950	Mesophyll2	0.358855	157
OG0002038	AT4G01150	Mesophyll3	0.537784	162	Solyc01g095430	Mesophyll2	0.400543	126
OG0000817	AT1G19180	Mesophyll3	0.533845	165	Solyc07g042170	Mesophyll2	1.22902	22
OG0003261	AT2G23810	Mesophyll3	0.526052	169	Solyc07g006280	Mesophyll2	1.24006	21
OG0006787	AT5G54270	Mesophyll3	0.517265	172	Solyc07g063600	Mesophyll2	0.932387	28
OG0006787	AT5G54270	Mesophyll3	0.517265	172	Solyc12g011450	Mesophyll2	0.399284	127
OG0003272	AT2G05100	Mesophyll3	0.507884	180	Solyc07g047850	Mesophyll2	0.401628	125
OG0000056	AT5G59690	Proliferating1	3.29583	1	Solyc06g005430	MZ1	1.78317	3
OG0000056	AT5G59690	Proliferating1	3.29583	1	Solyc06g075930	MZ1	1.75326	6
OG0000056	AT5G59690	Proliferating1	3.29583	1	Solyc11g072860	MZ1	1.74343	7
OG0000056	AT5G59690	Proliferating1	3.29583	1	Solyc04g011390	MZ1	1.70902	10
OG0000056	AT5G59690	Proliferating1	3.29583	1	Solyc11g072840	MZ1	1.67837	13
OG0000056	AT5G59690	Proliferating1	3.29583	1	Solyc06g005420	MZ1	1.63517	16
OG0000056	AT5G59690	Proliferating1	3.29583	1	Solyc06g075960	MZ1	1.59925	21
OG0000056	AT5G59690	Proliferating1	3.29583	1	Solyc05g054610	MZ1	1.53498	23
OG0000056	AT5G59690	Proliferating1	3.29583	1	Solyc06g075830	MZ1	1.52473	24
OG0000056	AT5G59690	Proliferating1	3.29583	1	Solyc11g066160	MZ1	1.38002	29
OG0000056	AT5G59690	Proliferating1	3.29583	1	Solyc06g072240	MZ1	0.604191	41
OG0000062	AT5G10400	Proliferating1	3.2534	2	Solyc02g077480	MZ1	1.6158	18
OG0000062	AT5G10400	Proliferating1	3.2534	2	Solyc10g008910	MZ1	1.61564	19
OG0000062	AT5G10400	Proliferating1	3.2534	2	Solyc12g056540	MZ1	1.61189	20
OG0000062	AT5G10400	Proliferating1	3.2534	2	Solyc04g074580	MZ1	1.41477	25
OG0000062	AT5G10400	Proliferating1	3.2534	2	Solyc01g079110	MZ1	1.2699	31
OG0000525	AT5G59870	Proliferating1	3.23093	3	Solyc01g099410	MZ1	1.88218	2
OG0000525	AT5G59870	Proliferating1	3.23093	3	Solyc11g073250	MZ1	1.78205	5
OG0000525	AT5G59870	Proliferating1	3.23093	3	Solyc09g010400	MZ1	1.73472	8
OG0000062	AT5G65360	Proliferating1	3.07522	4	Solyc02g077480	MZ1	1.6158	18
OG0000062	AT5G65360	Proliferating1	3.07522	4	Solyc10g008910	MZ1	1.61564	19
OG0000062	AT5G65360	Proliferating1	3.07522	4	Solyc12g056540	MZ1	1.61189	20
OG0000062	AT5G65360	Proliferating1	3.07522	4	Solyc04g074580	MZ1	1.41477	25
OG0000062	AT5G65360	Proliferating1	3.07522	4	Solyc01g079110	MZ1	1.2699	31
OG0000133	AT5G22880	Proliferating1	3.06551	5	Solyc06g074780	MZ1	1.93757	1
OG0000133	AT5G22880	Proliferating1	3.06551	5	Solyc11g066430	MZ1	1.78252	4
OG0000133	AT5G22880	Proliferating1	3.06551	5	Solyc05g055440	MZ1	1.6829	12
OG0000133	AT5G22880	Proliferating1	3.06551	5	Solyc11g007930	MZ1	1.66768	14
OG0000133	AT5G22880	Proliferating1	3.06551	5	Solyc06g075800	MZ1	1.53784	22
OG0000133	AT5G22880	Proliferating1	3.06551	5	Solyc12g011455	MZ1	1.39391	27
OG0000133	AT5G22880	Proliferating1	3.06551	5	Solyc02g038690	MZ1	1.35065	30
OG0000133	AT5G22880	Proliferating1	3.06551	5	Solyc12g013510	MZ1	1.26544	32
OG0000062	AT1G09200	Proliferating1	2.90606	6	Solyc02g077480	MZ1	1.6158	18
OG0000062	AT1G09200	Proliferating1	2.90606	6	Solyc10g008910	MZ1	1.61564	19
OG0000062	AT1G09200	Proliferating1	2.90606	6	Solyc12g056540	MZ1	1.61189	20
OG0000062	AT1G09200	Proliferating1	2.90606	6	Solyc04g074580	MZ1	1.41477	25
OG0000062	AT1G09200	Proliferating1	2.90606	6	Solyc01g079110	MZ1	1.2699	31
OG0001293	AT1G51060	Proliferating1	2.78902	7	Solyc10g006560	MZ1	1.66022	15
OG0001293	AT1G51060	Proliferating1	2.78902	7	Solyc12g005270	MZ1	1.39455	26
OG0001293	AT3G20670	Proliferating1	2.72521	8	Solyc10g006560	MZ1	1.66022	15
OG0001293	AT3G20670	Proliferating1	2.72521	8	Solyc12g005270	MZ1	1.39455	26
OG0000056	AT1G07820	Proliferating1	2.71017	9	Solyc06g005430	MZ1	1.78317	3
OG0000056	AT1G07820	Proliferating1	2.71017	9	Solyc06g075930	MZ1	1.75326	6
OG0000056	AT1G07820	Proliferating1	2.71017	9	Solyc11g072860	MZ1	1.74343	7
OG0000056	AT1G07820	Proliferating1	2.71017	9	Solyc04g011390	MZ1	1.70902	10
OG0000056	AT1G07820	Proliferating1	2.71017	9	Solyc11g072840	MZ1	1.67837	13
OG0000056	AT1G07820	Proliferating1	2.71017	9	Solyc06g005420	MZ1	1.63517	16
OG0000056	AT1G07820	Proliferating1	2.71017	9	Solyc06g075960	MZ1	1.59925	21
OG0000056	AT1G07820	Proliferating1	2.71017	9	Solyc05g054610	MZ1	1.53498	23
OG0000056	AT1G07820	Proliferating1	2.71017	9	Solyc06g075830	MZ1	1.52473	24
OG0000056	AT1G07820	Proliferating1	2.71017	9	Solyc11g066160	MZ1	1.38002	29
OG0000056	AT1G07820	Proliferating1	2.71017	9	Solyc06g072240	MZ1	0.604191	41
OG0000062	AT3G27360	Proliferating1	2.64273	10	Solyc02g077480	MZ1	1.6158	18
OG0000062	AT3G27360	Proliferating1	2.64273	10	Solyc10g008910	MZ1	1.61564	19
OG0000062	AT3G27360	Proliferating1	2.64273	10	Solyc12g056540	MZ1	1.61189	20
OG0000062	AT3G27360	Proliferating1	2.64273	10	Solyc04g074580	MZ1	1.41477	25
OG0000062	AT3G27360	Proliferating1	2.64273	10	Solyc01g079110	MZ1	1.2699	31
OG0000133	AT3G45980	Proliferating1	2.61684	11	Solyc06g074780	MZ1	1.93757	1
OG0000133	AT3G45980	Proliferating1	2.61684	11	Solyc11g066430	MZ1	1.78252	4
OG0000133	AT3G45980	Proliferating1	2.61684	11	Solyc05g055440	MZ1	1.6829	12
OG0000133	AT3G45980	Proliferating1	2.61684	11	Solyc11g007930	MZ1	1.66768	14
OG0000133	AT3G45980	Proliferating1	2.61684	11	Solyc06g075800	MZ1	1.53784	22
OG0000133	AT3G45980	Proliferating1	2.61684	11	Solyc12g011455	MZ1	1.39391	27
OG0000133	AT3G45980	Proliferating1	2.61684	11	Solyc02g038690	MZ1	1.35065	30
OG0000133	AT3G45980	Proliferating1	2.61684	11	Solyc12g013510	MZ1	1.26544	32
OG0000133	AT2G37470	Proliferating1	2.59605	12	Solyc06g074780	MZ1	1.93757	1
OG0000133	AT2G37470	Proliferating1	2.59605	12	Solyc11g066430	MZ1	1.78252	4
OG0000133	AT2G37470	Proliferating1	2.59605	12	Solyc05g055440	MZ1	1.6829	12
OG0000133	AT2G37470	Proliferating1	2.59605	12	Solyc11g007930	MZ1	1.66768	14
OG0000133	AT2G37470	Proliferating1	2.59605	12	Solyc06g075800	MZ1	1.53784	22
OG0000133	AT2G37470	Proliferating1	2.59605	12	Solyc12g011455	MZ1	1.39391	27
OG0000133	AT2G37470	Proliferating1	2.59605	12	Solyc02g038690	MZ1	1.35065	30
OG0000133	AT2G37470	Proliferating1	2.59605	12	Solyc12g013510	MZ1	1.26544	32
OG0000133	AT3G46030	Proliferating1	2.59158	13	Solyc06g074780	MZ1	1.93757	1
OG0000133	AT3G46030	Proliferating1	2.59158	13	Solyc11g066430	MZ1	1.78252	4
OG0000133	AT3G46030	Proliferating1	2.59158	13	Solyc05g055440	MZ1	1.6829	12
OG0000133	AT3G46030	Proliferating1	2.59158	13	Solyc11g007930	MZ1	1.66768	14
OG0000133	AT3G46030	Proliferating1	2.59158	13	Solyc06g075800	MZ1	1.53784	22
OG0000133	AT3G46030	Proliferating1	2.59158	13	Solyc12g011455	MZ1	1.39391	27
OG0000133	AT3G46030	Proliferating1	2.59158	13	Solyc02g038690	MZ1	1.35065	30
OG0000133	AT3G46030	Proliferating1	2.59158	13	Solyc12g013510	MZ1	1.26544	32
OG0000133	AT5G59910	Proliferating1	2.54968	14	Solyc06g074780	MZ1	1.93757	1
OG0000133	AT5G59910	Proliferating1	2.54968	14	Solyc11g066430	MZ1	1.78252	4
OG0000133	AT5G59910	Proliferating1	2.54968	14	Solyc05g055440	MZ1	1.6829	12
OG0000133	AT5G59910	Proliferating1	2.54968	14	Solyc11g007930	MZ1	1.66768	14
OG0000133	AT5G59910	Proliferating1	2.54968	14	Solyc06g075800	MZ1	1.53784	22
OG0000133	AT5G59910	Proliferating1	2.54968	14	Solyc12g011455	MZ1	1.39391	27
OG0000133	AT5G59910	Proliferating1	2.54968	14	Solyc02g038690	MZ1	1.35065	30
OG0000133	AT5G59910	Proliferating1	2.54968	14	Solyc12g013510	MZ1	1.26544	32
OG0000056	AT3G46320	Proliferating1	2.52788	15	Solyc06g005430	MZ1	1.78317	3
OG0000056	AT3G46320	Proliferating1	2.52788	15	Solyc06g075930	MZ1	1.75326	6
OG0000056	AT3G46320	Proliferating1	2.52788	15	Solyc11g072860	MZ1	1.74343	7
OG0000056	AT3G46320	Proliferating1	2.52788	15	Solyc04g011390	MZ1	1.70902	10
OG0000056	AT3G46320	Proliferating1	2.52788	15	Solyc11g072840	MZ1	1.67837	13
OG0000056	AT3G46320	Proliferating1	2.52788	15	Solyc06g005420	MZ1	1.63517	16
OG0000056	AT3G46320	Proliferating1	2.52788	15	Solyc06g075960	MZ1	1.59925	21
OG0000056	AT3G46320	Proliferating1	2.52788	15	Solyc05g054610	MZ1	1.53498	23
OG0000056	AT3G46320	Proliferating1	2.52788	15	Solyc06g075830	MZ1	1.52473	24
OG0000056	AT3G46320	Proliferating1	2.52788	15	Solyc11g066160	MZ1	1.38002	29
OG0000056	AT3G46320	Proliferating1	2.52788	15	Solyc06g072240	MZ1	0.604191	41
OG0000056	AT3G45930	Proliferating1	2.48252	16	Solyc06g005430	MZ1	1.78317	3
OG0000056	AT3G45930	Proliferating1	2.48252	16	Solyc06g075930	MZ1	1.75326	6
OG0000056	AT3G45930	Proliferating1	2.48252	16	Solyc11g072860	MZ1	1.74343	7
OG0000056	AT3G45930	Proliferating1	2.48252	16	Solyc04g011390	MZ1	1.70902	10
OG0000056	AT3G45930	Proliferating1	2.48252	16	Solyc11g072840	MZ1	1.67837	13
OG0000056	AT3G45930	Proliferating1	2.48252	16	Solyc06g005420	MZ1	1.63517	16
OG0000056	AT3G45930	Proliferating1	2.48252	16	Solyc06g075960	MZ1	1.59925	21
OG0000056	AT3G45930	Proliferating1	2.48252	16	Solyc05g054610	MZ1	1.53498	23
OG0000056	AT3G45930	Proliferating1	2.48252	16	Solyc06g075830	MZ1	1.52473	24
OG0000056	AT3G45930	Proliferating1	2.48252	16	Solyc11g066160	MZ1	1.38002	29
OG0000056	AT3G45930	Proliferating1	2.48252	16	Solyc06g072240	MZ1	0.604191	41
OG0000062	AT5G10390	Proliferating1	2.48166	17	Solyc02g077480	MZ1	1.6158	18
OG0000062	AT5G10390	Proliferating1	2.48166	17	Solyc10g008910	MZ1	1.61564	19
OG0000062	AT5G10390	Proliferating1	2.48166	17	Solyc12g056540	MZ1	1.61189	20
OG0000062	AT5G10390	Proliferating1	2.48166	17	Solyc04g074580	MZ1	1.41477	25
OG0000062	AT5G10390	Proliferating1	2.48166	17	Solyc01g079110	MZ1	1.2699	31
OG0000056	AT2G28740	Proliferating1	2.47539	18	Solyc06g005430	MZ1	1.78317	3
OG0000056	AT2G28740	Proliferating1	2.47539	18	Solyc06g075930	MZ1	1.75326	6
OG0000056	AT2G28740	Proliferating1	2.47539	18	Solyc11g072860	MZ1	1.74343	7
OG0000056	AT2G28740	Proliferating1	2.47539	18	Solyc04g011390	MZ1	1.70902	10
OG0000056	AT2G28740	Proliferating1	2.47539	18	Solyc11g072840	MZ1	1.67837	13
OG0000056	AT2G28740	Proliferating1	2.47539	18	Solyc06g005420	MZ1	1.63517	16
OG0000056	AT2G28740	Proliferating1	2.47539	18	Solyc06g075960	MZ1	1.59925	21
OG0000056	AT2G28740	Proliferating1	2.47539	18	Solyc05g054610	MZ1	1.53498	23
OG0000056	AT2G28740	Proliferating1	2.47539	18	Solyc06g075830	MZ1	1.52473	24
OG0000056	AT2G28740	Proliferating1	2.47539	18	Solyc11g066160	MZ1	1.38002	29
OG0000056	AT2G28740	Proliferating1	2.47539	18	Solyc06g072240	MZ1	0.604191	41
OG0000056	AT5G59970	Proliferating1	2.43454	19	Solyc06g005430	MZ1	1.78317	3
OG0000056	AT5G59970	Proliferating1	2.43454	19	Solyc06g075930	MZ1	1.75326	6
OG0000056	AT5G59970	Proliferating1	2.43454	19	Solyc11g072860	MZ1	1.74343	7
OG0000056	AT5G59970	Proliferating1	2.43454	19	Solyc04g011390	MZ1	1.70902	10
OG0000056	AT5G59970	Proliferating1	2.43454	19	Solyc11g072840	MZ1	1.67837	13
OG0000056	AT5G59970	Proliferating1	2.43454	19	Solyc06g005420	MZ1	1.63517	16
OG0000056	AT5G59970	Proliferating1	2.43454	19	Solyc06g075960	MZ1	1.59925	21
OG0000056	AT5G59970	Proliferating1	2.43454	19	Solyc05g054610	MZ1	1.53498	23
OG0000056	AT5G59970	Proliferating1	2.43454	19	Solyc06g075830	MZ1	1.52473	24
OG0000056	AT5G59970	Proliferating1	2.43454	19	Solyc11g066160	MZ1	1.38002	29
OG0000056	AT5G59970	Proliferating1	2.43454	19	Solyc06g072240	MZ1	0.604191	41
OG0002315	AT1G08880	Proliferating1	2.36645	20	Solyc09g082710	MZ1	1.62005	17
OG0000056	AT3G53730	Proliferating1	2.35795	21	Solyc06g005430	MZ1	1.78317	3
OG0000056	AT3G53730	Proliferating1	2.35795	21	Solyc06g075930	MZ1	1.75326	6
OG0000056	AT3G53730	Proliferating1	2.35795	21	Solyc11g072860	MZ1	1.74343	7
OG0000056	AT3G53730	Proliferating1	2.35795	21	Solyc04g011390	MZ1	1.70902	10
OG0000056	AT3G53730	Proliferating1	2.35795	21	Solyc11g072840	MZ1	1.67837	13
OG0000056	AT3G53730	Proliferating1	2.35795	21	Solyc06g005420	MZ1	1.63517	16
OG0000056	AT3G53730	Proliferating1	2.35795	21	Solyc06g075960	MZ1	1.59925	21
OG0000056	AT3G53730	Proliferating1	2.35795	21	Solyc05g054610	MZ1	1.53498	23
OG0000056	AT3G53730	Proliferating1	2.35795	21	Solyc06g075830	MZ1	1.52473	24
OG0000056	AT3G53730	Proliferating1	2.35795	21	Solyc11g066160	MZ1	1.38002	29
OG0000056	AT3G53730	Proliferating1	2.35795	21	Solyc06g072240	MZ1	0.604191	41
OG0001293	AT4G27230	Proliferating1	2.22627	23	Solyc10g006560	MZ1	1.66022	15
OG0001293	AT4G27230	Proliferating1	2.22627	23	Solyc12g005270	MZ1	1.39455	26
OG0001380	AT3G54560	Proliferating1	2.19292	24	Solyc09g065755	MZ1	0.291098	114
OG0003963	AT1G14900	Proliferating1	2.08874	25	Solyc04g007890	MZ1	1.70214	11
OG0000525	AT5G27670	Proliferating1	2.08195	26	Solyc01g099410	MZ1	1.88218	2
OG0000525	AT5G27670	Proliferating1	2.08195	26	Solyc11g073250	MZ1	1.78205	5
OG0000525	AT5G27670	Proliferating1	2.08195	26	Solyc09g010400	MZ1	1.73472	8
OG0000133	AT1G07790	Proliferating1	1.99636	27	Solyc06g074780	MZ1	1.93757	1
OG0000133	AT1G07790	Proliferating1	1.99636	27	Solyc11g066430	MZ1	1.78252	4
OG0000133	AT1G07790	Proliferating1	1.99636	27	Solyc05g055440	MZ1	1.6829	12
OG0000133	AT1G07790	Proliferating1	1.99636	27	Solyc11g007930	MZ1	1.66768	14
OG0000133	AT1G07790	Proliferating1	1.99636	27	Solyc06g075800	MZ1	1.53784	22
OG0000133	AT1G07790	Proliferating1	1.99636	27	Solyc12g011455	MZ1	1.39391	27
OG0000133	AT1G07790	Proliferating1	1.99636	27	Solyc02g038690	MZ1	1.35065	30
OG0000133	AT1G07790	Proliferating1	1.99636	27	Solyc12g013510	MZ1	1.26544	32
OG0002315	AT1G54690	Proliferating1	1.83962	30	Solyc09g082710	MZ1	1.62005	17
OG0001293	AT5G54640	Proliferating1	1.72368	31	Solyc10g006560	MZ1	1.66022	15
OG0001293	AT5G54640	Proliferating1	1.72368	31	Solyc12g005270	MZ1	1.39455	26
OG0000062	AT5G10980	Proliferating1	1.34902	32	Solyc02g077480	MZ1	1.6158	18
OG0000062	AT5G10980	Proliferating1	1.34902	32	Solyc10g008910	MZ1	1.61564	19
OG0000062	AT5G10980	Proliferating1	1.34902	32	Solyc12g056540	MZ1	1.61189	20
OG0000062	AT5G10980	Proliferating1	1.34902	32	Solyc04g074580	MZ1	1.41477	25
OG0000062	AT5G10980	Proliferating1	1.34902	32	Solyc01g079110	MZ1	1.2699	31
OG0009629	AT5G23420	Proliferating1	1.33467	33	Solyc04g008820	MZ1	0.755921	35
OG0001380	AT2G38810	Proliferating1	1.32831	34	Solyc09g065755	MZ1	0.291098	114
OG0008707	AT3G07800	Proliferating1	1.29052	35	Solyc11g065760	MZ1	0.552728	45
OG0003053	AT1G20696	Proliferating1	1.18667	36	Solyc02g082700	MZ1	1.25496	33
OG0003053	AT1G20696	Proliferating1	1.18667	36	Solyc03g032130	MZ1	0.671704	38
OG0003053	AT1G20693	Proliferating1	1.14914	37	Solyc02g082700	MZ1	1.25496	33
OG0003053	AT1G20693	Proliferating1	1.14914	37	Solyc03g032130	MZ1	0.671704	38
OG0003427	AT5G63550	Proliferating1	1.12671	38	Solyc06g072660	MZ1	0.294607	112
OG0000062	AT4G40040	Proliferating1	0.962661	42	Solyc02g077480	MZ1	1.6158	18
OG0000062	AT4G40040	Proliferating1	0.962661	42	Solyc10g008910	MZ1	1.61564	19
OG0000062	AT4G40040	Proliferating1	0.962661	42	Solyc12g056540	MZ1	1.61189	20
OG0000062	AT4G40040	Proliferating1	0.962661	42	Solyc04g074580	MZ1	1.41477	25
OG0000062	AT4G40040	Proliferating1	0.962661	42	Solyc01g079110	MZ1	1.2699	31
OG0005416	AT2G29570	Proliferating1	0.936311	43	Solyc06g076660	MZ1	0.419555	59
OG0005416	AT1G07370	Proliferating1	0.874604	47	Solyc06g076660	MZ1	0.419555	59
OG0004083	AT5G38690	Proliferating1	0.842317	49	Solyc02g063060	MZ1	0.451835	52
OG0011563	AT2G28790	Proliferating1	0.689043	76	Solyc11g066130	MZ1	0.267896	145
OG0001301	AT2G32060	Proliferating1	0.612631	105	Solyc12g042650	MZ1	0.294322	113
OG0000056	AT1G07660	Proliferating1	0.602436	111	Solyc06g005430	MZ1	1.78317	3
OG0000056	AT1G07660	Proliferating1	0.602436	111	Solyc06g075930	MZ1	1.75326	6
OG0000056	AT1G07660	Proliferating1	0.602436	111	Solyc11g072860	MZ1	1.74343	7
OG0000056	AT1G07660	Proliferating1	0.602436	111	Solyc04g011390	MZ1	1.70902	10
OG0000056	AT1G07660	Proliferating1	0.602436	111	Solyc11g072840	MZ1	1.67837	13
OG0000056	AT1G07660	Proliferating1	0.602436	111	Solyc06g005420	MZ1	1.63517	16
OG0000056	AT1G07660	Proliferating1	0.602436	111	Solyc06g075960	MZ1	1.59925	21
OG0000056	AT1G07660	Proliferating1	0.602436	111	Solyc05g054610	MZ1	1.53498	23
OG0000056	AT1G07660	Proliferating1	0.602436	111	Solyc06g075830	MZ1	1.52473	24
OG0000056	AT1G07660	Proliferating1	0.602436	111	Solyc11g066160	MZ1	1.38002	29
OG0000056	AT1G07660	Proliferating1	0.602436	111	Solyc06g072240	MZ1	0.604191	41
OG0004675	AT5G64140	Proliferating1	0.585691	119	Solyc02g021400	MZ1	0.266054	150
OG0001982	AT4G15000	Proliferating1	0.573424	128	Solyc06g073300	MZ1	0.271487	143
OG0001127	AT3G09200	Proliferating1	0.557433	134	Solyc05g054580	MZ1	0.323511	87
OG0001045	AT2G41840	Proliferating1	0.552324	137	Solyc04g063290	MZ1	0.317938	91
OG0002631	AT3G49910	Proliferating1	0.540121	142	Solyc03g044000	MZ1	0.250475	171
OG0002550	AT2G20450	Proliferating1	0.535189	146	Solyc06g008260	MZ1	0.277416	128
OG0002485	AT5G07090	Proliferating1	0.530062	148	Solyc02g070330	MZ1	0.304738	104
OG0003610	AT4G31700	Proliferating1	0.51957	156	Solyc12g096300	MZ1	0.256815	162
OG0001342	AT1G22780	Proliferating1	0.518297	157	Solyc03g078290	MZ1	0.28509	120
OG0001982	AT3G22230	Proliferating1	0.515693	161	Solyc06g073300	MZ1	0.271487	143
OG0002811	AT5G15200	Proliferating1	0.514582	164	Solyc01g010580	MZ1	0.321107	90
OG0002512	AT4G36130	Proliferating1	0.512901	167	Solyc10g006580	MZ1	0.273859	136
OG0001912	AT5G56670	Proliferating1	0.511642	169	Solyc12g008700	MZ1	0.314681	94
OG0001173	AT5G02960	Proliferating1	0.51164	170	Solyc10g084310	MZ1	0.301595	106
OG0001806	AT3G16080	Proliferating1	0.510411	175	Solyc06g066660	MZ1	0.250705	170
OG0001454	AT2G47610	Proliferating1	0.507252	178	Solyc01g097760	MZ1	0.344459	79
OG0004105	AT1G67430	Proliferating1	0.506141	180	Solyc06g071880	MZ1	0.250358	172
OG0001485	AT5G18380	Proliferating1	0.50579	182	Solyc05g005690	MZ1	0.363056	72
OG0001912	AT4G29390	Proliferating1	0.501602	186	Solyc12g008700	MZ1	0.314681	94
OG0000056	AT5G59690	Proliferating1	3.29583	1	Solyc11g072840	MZ2	1.39538	8
OG0000056	AT5G59690	Proliferating1	3.29583	1	Solyc06g072240	MZ2	1.07105	19
OG0000056	AT5G59690	Proliferating1	3.29583	1	Solyc05g054610	MZ2	1.0066	23
OG0000056	AT5G59690	Proliferating1	3.29583	1	Solyc11g072860	MZ2	0.889371	28
OG0000056	AT5G59690	Proliferating1	3.29583	1	Solyc06g005430	MZ2	0.795101	39
OG0000056	AT5G59690	Proliferating1	3.29583	1	Solyc04g011390	MZ2	0.720892	45
OG0000056	AT5G59690	Proliferating1	3.29583	1	Solyc06g005420	MZ2	0.461807	82
OG0000056	AT5G59690	Proliferating1	3.29583	1	Solyc06g075930	MZ2	0.425632	93
OG0000056	AT5G59690	Proliferating1	3.29583	1	Solyc06g075830	MZ2	0.38225	121
OG0000056	AT5G59690	Proliferating1	3.29583	1	Solyc06g075960	MZ2	0.378218	123
OG0000056	AT5G59690	Proliferating1	3.29583	1	Solyc11g066160	MZ2	0.285455	176
OG0000062	AT5G10400	Proliferating1	3.2534	2	Solyc01g079110	MZ2	1.02409	20
OG0000062	AT5G10400	Proliferating1	3.2534	2	Solyc02g077480	MZ2	0.529493	66
OG0000062	AT5G10400	Proliferating1	3.2534	2	Solyc10g008910	MZ2	0.46274	81
OG0000062	AT5G10400	Proliferating1	3.2534	2	Solyc12g056540	MZ2	0.356585	133
OG0000062	AT5G10400	Proliferating1	3.2534	2	Solyc04g074580	MZ2	0.284471	178
OG0000525	AT5G59870	Proliferating1	3.23093	3	Solyc11g073250	MZ2	1.1098	18
OG0000525	AT5G59870	Proliferating1	3.23093	3	Solyc01g099410	MZ2	0.592345	54
OG0000525	AT5G59870	Proliferating1	3.23093	3	Solyc09g010400	MZ2	0.528514	67
OG0000062	AT5G65360	Proliferating1	3.07522	4	Solyc01g079110	MZ2	1.02409	20
OG0000062	AT5G65360	Proliferating1	3.07522	4	Solyc02g077480	MZ2	0.529493	66
OG0000062	AT5G65360	Proliferating1	3.07522	4	Solyc10g008910	MZ2	0.46274	81
OG0000062	AT5G65360	Proliferating1	3.07522	4	Solyc12g056540	MZ2	0.356585	133
OG0000062	AT5G65360	Proliferating1	3.07522	4	Solyc04g074580	MZ2	0.284471	178
OG0000133	AT5G22880	Proliferating1	3.06551	5	Solyc06g075800	MZ2	0.875996	29
OG0000133	AT5G22880	Proliferating1	3.06551	5	Solyc11g007930	MZ2	0.729885	44
OG0000133	AT5G22880	Proliferating1	3.06551	5	Solyc06g074780	MZ2	0.629685	53
OG0000133	AT5G22880	Proliferating1	3.06551	5	Solyc11g066430	MZ2	0.541642	63
OG0000133	AT5G22880	Proliferating1	3.06551	5	Solyc02g038690	MZ2	0.371164	126
OG0000133	AT5G22880	Proliferating1	3.06551	5	Solyc05g055440	MZ2	0.365311	132
OG0000062	AT1G09200	Proliferating1	2.90606	6	Solyc01g079110	MZ2	1.02409	20
OG0000062	AT1G09200	Proliferating1	2.90606	6	Solyc02g077480	MZ2	0.529493	66
OG0000062	AT1G09200	Proliferating1	2.90606	6	Solyc10g008910	MZ2	0.46274	81
OG0000062	AT1G09200	Proliferating1	2.90606	6	Solyc12g056540	MZ2	0.356585	133
OG0000062	AT1G09200	Proliferating1	2.90606	6	Solyc04g074580	MZ2	0.284471	178
OG0001293	AT1G51060	Proliferating1	2.78902	7	Solyc12g005270	MZ2	0.550231	61
OG0001293	AT1G51060	Proliferating1	2.78902	7	Solyc10g006560	MZ2	0.543174	62
OG0001293	AT3G20670	Proliferating1	2.72521	8	Solyc12g005270	MZ2	0.550231	61
OG0001293	AT3G20670	Proliferating1	2.72521	8	Solyc10g006560	MZ2	0.543174	62
OG0000056	AT1G07820	Proliferating1	2.71017	9	Solyc11g072840	MZ2	1.39538	8
OG0000056	AT1G07820	Proliferating1	2.71017	9	Solyc06g072240	MZ2	1.07105	19
OG0000056	AT1G07820	Proliferating1	2.71017	9	Solyc05g054610	MZ2	1.0066	23
OG0000056	AT1G07820	Proliferating1	2.71017	9	Solyc11g072860	MZ2	0.889371	28
OG0000056	AT1G07820	Proliferating1	2.71017	9	Solyc06g005430	MZ2	0.795101	39
OG0000056	AT1G07820	Proliferating1	2.71017	9	Solyc04g011390	MZ2	0.720892	45
OG0000056	AT1G07820	Proliferating1	2.71017	9	Solyc06g005420	MZ2	0.461807	82
OG0000056	AT1G07820	Proliferating1	2.71017	9	Solyc06g075930	MZ2	0.425632	93
OG0000056	AT1G07820	Proliferating1	2.71017	9	Solyc06g075830	MZ2	0.38225	121
OG0000056	AT1G07820	Proliferating1	2.71017	9	Solyc06g075960	MZ2	0.378218	123
OG0000056	AT1G07820	Proliferating1	2.71017	9	Solyc11g066160	MZ2	0.285455	176
OG0000062	AT3G27360	Proliferating1	2.64273	10	Solyc01g079110	MZ2	1.02409	20
OG0000062	AT3G27360	Proliferating1	2.64273	10	Solyc02g077480	MZ2	0.529493	66
OG0000062	AT3G27360	Proliferating1	2.64273	10	Solyc10g008910	MZ2	0.46274	81
OG0000062	AT3G27360	Proliferating1	2.64273	10	Solyc12g056540	MZ2	0.356585	133
OG0000062	AT3G27360	Proliferating1	2.64273	10	Solyc04g074580	MZ2	0.284471	178
OG0000133	AT3G45980	Proliferating1	2.61684	11	Solyc06g075800	MZ2	0.875996	29
OG0000133	AT3G45980	Proliferating1	2.61684	11	Solyc11g007930	MZ2	0.729885	44
OG0000133	AT3G45980	Proliferating1	2.61684	11	Solyc06g074780	MZ2	0.629685	53
OG0000133	AT3G45980	Proliferating1	2.61684	11	Solyc11g066430	MZ2	0.541642	63
OG0000133	AT3G45980	Proliferating1	2.61684	11	Solyc02g038690	MZ2	0.371164	126
OG0000133	AT3G45980	Proliferating1	2.61684	11	Solyc05g055440	MZ2	0.365311	132
OG0000133	AT2G37470	Proliferating1	2.59605	12	Solyc06g075800	MZ2	0.875996	29
OG0000133	AT2G37470	Proliferating1	2.59605	12	Solyc11g007930	MZ2	0.729885	44
OG0000133	AT2G37470	Proliferating1	2.59605	12	Solyc06g074780	MZ2	0.629685	53
OG0000133	AT2G37470	Proliferating1	2.59605	12	Solyc11g066430	MZ2	0.541642	63
OG0000133	AT2G37470	Proliferating1	2.59605	12	Solyc02g038690	MZ2	0.371164	126
OG0000133	AT2G37470	Proliferating1	2.59605	12	Solyc05g055440	MZ2	0.365311	132
OG0000133	AT3G46030	Proliferating1	2.59158	13	Solyc06g075800	MZ2	0.875996	29
OG0000133	AT3G46030	Proliferating1	2.59158	13	Solyc11g007930	MZ2	0.729885	44
OG0000133	AT3G46030	Proliferating1	2.59158	13	Solyc06g074780	MZ2	0.629685	53
OG0000133	AT3G46030	Proliferating1	2.59158	13	Solyc11g066430	MZ2	0.541642	63
OG0000133	AT3G46030	Proliferating1	2.59158	13	Solyc02g038690	MZ2	0.371164	126
OG0000133	AT3G46030	Proliferating1	2.59158	13	Solyc05g055440	MZ2	0.365311	132
OG0000133	AT5G59910	Proliferating1	2.54968	14	Solyc06g075800	MZ2	0.875996	29
OG0000133	AT5G59910	Proliferating1	2.54968	14	Solyc11g007930	MZ2	0.729885	44
OG0000133	AT5G59910	Proliferating1	2.54968	14	Solyc06g074780	MZ2	0.629685	53
OG0000133	AT5G59910	Proliferating1	2.54968	14	Solyc11g066430	MZ2	0.541642	63
OG0000133	AT5G59910	Proliferating1	2.54968	14	Solyc02g038690	MZ2	0.371164	126
OG0000133	AT5G59910	Proliferating1	2.54968	14	Solyc05g055440	MZ2	0.365311	132
OG0000056	AT3G46320	Proliferating1	2.52788	15	Solyc11g072840	MZ2	1.39538	8
OG0000056	AT3G46320	Proliferating1	2.52788	15	Solyc06g072240	MZ2	1.07105	19
OG0000056	AT3G46320	Proliferating1	2.52788	15	Solyc05g054610	MZ2	1.0066	23
OG0000056	AT3G46320	Proliferating1	2.52788	15	Solyc11g072860	MZ2	0.889371	28
OG0000056	AT3G46320	Proliferating1	2.52788	15	Solyc06g005430	MZ2	0.795101	39
OG0000056	AT3G46320	Proliferating1	2.52788	15	Solyc04g011390	MZ2	0.720892	45
OG0000056	AT3G46320	Proliferating1	2.52788	15	Solyc06g005420	MZ2	0.461807	82
OG0000056	AT3G46320	Proliferating1	2.52788	15	Solyc06g075930	MZ2	0.425632	93
OG0000056	AT3G46320	Proliferating1	2.52788	15	Solyc06g075830	MZ2	0.38225	121
OG0000056	AT3G46320	Proliferating1	2.52788	15	Solyc06g075960	MZ2	0.378218	123
OG0000056	AT3G46320	Proliferating1	2.52788	15	Solyc11g066160	MZ2	0.285455	176
OG0000056	AT3G45930	Proliferating1	2.48252	16	Solyc11g072840	MZ2	1.39538	8
OG0000056	AT3G45930	Proliferating1	2.48252	16	Solyc06g072240	MZ2	1.07105	19
OG0000056	AT3G45930	Proliferating1	2.48252	16	Solyc05g054610	MZ2	1.0066	23
OG0000056	AT3G45930	Proliferating1	2.48252	16	Solyc11g072860	MZ2	0.889371	28
OG0000056	AT3G45930	Proliferating1	2.48252	16	Solyc06g005430	MZ2	0.795101	39
OG0000056	AT3G45930	Proliferating1	2.48252	16	Solyc04g011390	MZ2	0.720892	45
OG0000056	AT3G45930	Proliferating1	2.48252	16	Solyc06g005420	MZ2	0.461807	82
OG0000056	AT3G45930	Proliferating1	2.48252	16	Solyc06g075930	MZ2	0.425632	93
OG0000056	AT3G45930	Proliferating1	2.48252	16	Solyc06g075830	MZ2	0.38225	121
OG0000056	AT3G45930	Proliferating1	2.48252	16	Solyc06g075960	MZ2	0.378218	123
OG0000056	AT3G45930	Proliferating1	2.48252	16	Solyc11g066160	MZ2	0.285455	176
OG0000062	AT5G10390	Proliferating1	2.48166	17	Solyc01g079110	MZ2	1.02409	20
OG0000062	AT5G10390	Proliferating1	2.48166	17	Solyc02g077480	MZ2	0.529493	66
OG0000062	AT5G10390	Proliferating1	2.48166	17	Solyc10g008910	MZ2	0.46274	81
OG0000062	AT5G10390	Proliferating1	2.48166	17	Solyc12g056540	MZ2	0.356585	133
OG0000062	AT5G10390	Proliferating1	2.48166	17	Solyc04g074580	MZ2	0.284471	178
OG0000056	AT2G28740	Proliferating1	2.47539	18	Solyc11g072840	MZ2	1.39538	8
OG0000056	AT2G28740	Proliferating1	2.47539	18	Solyc06g072240	MZ2	1.07105	19
OG0000056	AT2G28740	Proliferating1	2.47539	18	Solyc05g054610	MZ2	1.0066	23
OG0000056	AT2G28740	Proliferating1	2.47539	18	Solyc11g072860	MZ2	0.889371	28
OG0000056	AT2G28740	Proliferating1	2.47539	18	Solyc06g005430	MZ2	0.795101	39
OG0000056	AT2G28740	Proliferating1	2.47539	18	Solyc04g011390	MZ2	0.720892	45
OG0000056	AT2G28740	Proliferating1	2.47539	18	Solyc06g005420	MZ2	0.461807	82
OG0000056	AT2G28740	Proliferating1	2.47539	18	Solyc06g075930	MZ2	0.425632	93
OG0000056	AT2G28740	Proliferating1	2.47539	18	Solyc06g075830	MZ2	0.38225	121
OG0000056	AT2G28740	Proliferating1	2.47539	18	Solyc06g075960	MZ2	0.378218	123
OG0000056	AT2G28740	Proliferating1	2.47539	18	Solyc11g066160	MZ2	0.285455	176
OG0000056	AT5G59970	Proliferating1	2.43454	19	Solyc11g072840	MZ2	1.39538	8
OG0000056	AT5G59970	Proliferating1	2.43454	19	Solyc06g072240	MZ2	1.07105	19
OG0000056	AT5G59970	Proliferating1	2.43454	19	Solyc05g054610	MZ2	1.0066	23
OG0000056	AT5G59970	Proliferating1	2.43454	19	Solyc11g072860	MZ2	0.889371	28
OG0000056	AT5G59970	Proliferating1	2.43454	19	Solyc06g005430	MZ2	0.795101	39
OG0000056	AT5G59970	Proliferating1	2.43454	19	Solyc04g011390	MZ2	0.720892	45
OG0000056	AT5G59970	Proliferating1	2.43454	19	Solyc06g005420	MZ2	0.461807	82
OG0000056	AT5G59970	Proliferating1	2.43454	19	Solyc06g075930	MZ2	0.425632	93
OG0000056	AT5G59970	Proliferating1	2.43454	19	Solyc06g075830	MZ2	0.38225	121
OG0000056	AT5G59970	Proliferating1	2.43454	19	Solyc06g075960	MZ2	0.378218	123
OG0000056	AT5G59970	Proliferating1	2.43454	19	Solyc11g066160	MZ2	0.285455	176
OG0002315	AT1G08880	Proliferating1	2.36645	20	Solyc09g082710	MZ2	0.953794	26
OG0000056	AT3G53730	Proliferating1	2.35795	21	Solyc11g072840	MZ2	1.39538	8
OG0000056	AT3G53730	Proliferating1	2.35795	21	Solyc06g072240	MZ2	1.07105	19
OG0000056	AT3G53730	Proliferating1	2.35795	21	Solyc05g054610	MZ2	1.0066	23
OG0000056	AT3G53730	Proliferating1	2.35795	21	Solyc11g072860	MZ2	0.889371	28
OG0000056	AT3G53730	Proliferating1	2.35795	21	Solyc06g005430	MZ2	0.795101	39
OG0000056	AT3G53730	Proliferating1	2.35795	21	Solyc04g011390	MZ2	0.720892	45
OG0000056	AT3G53730	Proliferating1	2.35795	21	Solyc06g005420	MZ2	0.461807	82
OG0000056	AT3G53730	Proliferating1	2.35795	21	Solyc06g075930	MZ2	0.425632	93
OG0000056	AT3G53730	Proliferating1	2.35795	21	Solyc06g075830	MZ2	0.38225	121
OG0000056	AT3G53730	Proliferating1	2.35795	21	Solyc06g075960	MZ2	0.378218	123
OG0000056	AT3G53730	Proliferating1	2.35795	21	Solyc11g066160	MZ2	0.285455	176
OG0001293	AT4G27230	Proliferating1	2.22627	23	Solyc12g005270	MZ2	0.550231	61
OG0001293	AT4G27230	Proliferating1	2.22627	23	Solyc10g006560	MZ2	0.543174	62
OG0003963	AT1G14900	Proliferating1	2.08874	25	Solyc04g007890	MZ2	0.674263	48
OG0000525	AT5G27670	Proliferating1	2.08195	26	Solyc11g073250	MZ2	1.1098	18
OG0000525	AT5G27670	Proliferating1	2.08195	26	Solyc01g099410	MZ2	0.592345	54
OG0000525	AT5G27670	Proliferating1	2.08195	26	Solyc09g010400	MZ2	0.528514	67
OG0000133	AT1G07790	Proliferating1	1.99636	27	Solyc06g075800	MZ2	0.875996	29
OG0000133	AT1G07790	Proliferating1	1.99636	27	Solyc11g007930	MZ2	0.729885	44
OG0000133	AT1G07790	Proliferating1	1.99636	27	Solyc06g074780	MZ2	0.629685	53
OG0000133	AT1G07790	Proliferating1	1.99636	27	Solyc11g066430	MZ2	0.541642	63
OG0000133	AT1G07790	Proliferating1	1.99636	27	Solyc02g038690	MZ2	0.371164	126
OG0000133	AT1G07790	Proliferating1	1.99636	27	Solyc05g055440	MZ2	0.365311	132
OG0006468	AT3G27060	Proliferating1	1.9117	28	Solyc02g094160	MZ2	0.797965	37
OG0002315	AT1G54690	Proliferating1	1.83962	30	Solyc09g082710	MZ2	0.953794	26
OG0001293	AT5G54640	Proliferating1	1.72368	31	Solyc12g005270	MZ2	0.550231	61
OG0001293	AT5G54640	Proliferating1	1.72368	31	Solyc10g006560	MZ2	0.543174	62
OG0000062	AT5G10980	Proliferating1	1.34902	32	Solyc01g079110	MZ2	1.02409	20
OG0000062	AT5G10980	Proliferating1	1.34902	32	Solyc02g077480	MZ2	0.529493	66
OG0000062	AT5G10980	Proliferating1	1.34902	32	Solyc10g008910	MZ2	0.46274	81
OG0000062	AT5G10980	Proliferating1	1.34902	32	Solyc12g056540	MZ2	0.356585	133
OG0000062	AT5G10980	Proliferating1	1.34902	32	Solyc04g074580	MZ2	0.284471	178
OG0009629	AT5G23420	Proliferating1	1.33467	33	Solyc04g008820	MZ2	1.63506	4
OG0008707	AT3G07800	Proliferating1	1.29052	35	Solyc11g065760	MZ2	1.41242	7
OG0003053	AT1G20696	Proliferating1	1.18667	36	Solyc02g082700	MZ2	0.657604	50
OG0003053	AT1G20693	Proliferating1	1.14914	37	Solyc02g082700	MZ2	0.657604	50
OG0003427	AT5G63550	Proliferating1	1.12671	38	Solyc06g072660	MZ2	1.3483	10
OG0003427	AT5G63550	Proliferating1	1.12671	38	Solyc03g097490	MZ2	0.642943	51
OG0000062	AT4G40040	Proliferating1	0.962661	42	Solyc01g079110	MZ2	1.02409	20
OG0000062	AT4G40040	Proliferating1	0.962661	42	Solyc02g077480	MZ2	0.529493	66
OG0000062	AT4G40040	Proliferating1	0.962661	42	Solyc10g008910	MZ2	0.46274	81
OG0000062	AT4G40040	Proliferating1	0.962661	42	Solyc12g056540	MZ2	0.356585	133
OG0000062	AT4G40040	Proliferating1	0.962661	42	Solyc04g074580	MZ2	0.284471	178
OG0005416	AT2G29570	Proliferating1	0.936311	43	Solyc06g076660	MZ2	0.388687	116
OG0002018	AT4G26630	Proliferating1	0.921954	45	Solyc07g065490	MZ2	0.300038	168
OG0008965	AT3G54750	Proliferating1	0.898497	46	Solyc01g006700	MZ2	0.398506	111
OG0005416	AT1G07370	Proliferating1	0.874604	47	Solyc06g076660	MZ2	0.388687	116
OG0004083	AT5G38690	Proliferating1	0.842317	49	Solyc02g063060	MZ2	0.738688	42
OG0004771	AT3G46940	Proliferating1	0.755505	58	Solyc01g100030	MZ2	0.957448	25
OG0004537	AT2G21790	Proliferating1	0.668214	85	Solyc04g012060	MZ2	1.11465	17
OG0004537	AT2G21790	Proliferating1	0.668214	85	Solyc04g051350	MZ2	0.848041	30
OG0000056	AT1G07660	Proliferating1	0.602436	111	Solyc11g072840	MZ2	1.39538	8
OG0000056	AT1G07660	Proliferating1	0.602436	111	Solyc06g072240	MZ2	1.07105	19
OG0000056	AT1G07660	Proliferating1	0.602436	111	Solyc05g054610	MZ2	1.0066	23
OG0000056	AT1G07660	Proliferating1	0.602436	111	Solyc11g072860	MZ2	0.889371	28
OG0000056	AT1G07660	Proliferating1	0.602436	111	Solyc06g005430	MZ2	0.795101	39
OG0000056	AT1G07660	Proliferating1	0.602436	111	Solyc04g011390	MZ2	0.720892	45
OG0000056	AT1G07660	Proliferating1	0.602436	111	Solyc06g005420	MZ2	0.461807	82
OG0000056	AT1G07660	Proliferating1	0.602436	111	Solyc06g075930	MZ2	0.425632	93
OG0000056	AT1G07660	Proliferating1	0.602436	111	Solyc06g075830	MZ2	0.38225	121
OG0000056	AT1G07660	Proliferating1	0.602436	111	Solyc06g075960	MZ2	0.378218	123
OG0000056	AT1G07660	Proliferating1	0.602436	111	Solyc11g066160	MZ2	0.285455	176
OG0000416	AT1G01620	Proliferating2	1.53352	25	Solyc01g094690	MZ1	0.272743	138
OG0000416	AT4G00430	Proliferating2	1.01819	46	Solyc01g094690	MZ1	0.272743	138
OG0018633	AT5G48480	Proliferating2	1.01183	47	Solyc06g007610	MZ1	0.367709	69
OG0003999	AT1G17140	Proliferating2	0.733183	67	Solyc07g056650	MZ1	0.327236	84
OG0001380	AT3G54560	Proliferating2	0.65567	85	Solyc09g065755	MZ1	0.291098	114
OG0003610	AT4G31700	Proliferating2	0.637677	92	Solyc12g096300	MZ1	0.256815	162
OG0000832	AT1G04480	Proliferating2	0.625301	100	Solyc09g090610	MZ1	0.308316	102
OG0001454	AT2G47610	Proliferating2	0.624145	102	Solyc01g097760	MZ1	0.344459	79
OG0002679	AT5G61170	Proliferating2	0.623889	103	Solyc12g039120	MZ1	0.276559	131
OG0003344	AT4G39200	Proliferating2	0.615261	108	Solyc02g069850	MZ1	0.267492	147
OG0001982	AT4G15000	Proliferating2	0.600838	120	Solyc06g073300	MZ1	0.271487	143
OG0002631	AT3G49910	Proliferating2	0.597811	121	Solyc03g044000	MZ1	0.250475	171
OG0001806	AT1G52300	Proliferating2	0.594742	123	Solyc06g066660	MZ1	0.250705	170
OG0001806	AT3G16080	Proliferating2	0.579319	135	Solyc06g066660	MZ1	0.250705	170
OG0001045	AT2G41840	Proliferating2	0.571472	141	Solyc04g063290	MZ1	0.317938	91
OG0004023	AT1G70600	Proliferating2	0.570756	142	Solyc03g112360	MZ1	0.300593	108
OG0001374	AT1G18540	Proliferating2	0.567165	144	Solyc04g014720	MZ1	0.358339	74
OG0002512	AT2G18020	Proliferating2	0.561848	152	Solyc10g006580	MZ1	0.273859	136
OG0001485	AT5G18380	Proliferating2	0.556971	155	Solyc05g005690	MZ1	0.363056	72
OG0000746	AT5G45775	Proliferating2	0.556433	157	Solyc12g010930	MZ1	0.258421	158
OG0002512	AT4G36130	Proliferating2	0.546687	164	Solyc10g006580	MZ1	0.273859	136
OG0004105	AT1G67430	Proliferating2	0.546074	166	Solyc06g071880	MZ1	0.250358	172
OG0001717	AT1G02780	Proliferating2	0.542642	170	Solyc06g009210	MZ1	0.25541	166
OG0004675	AT5G64140	Proliferating2	0.540415	172	Solyc02g021400	MZ1	0.266054	150
OG0002539	AT3G09500	Proliferating2	0.537939	174	Solyc04g010240	MZ1	0.326993	85
OG0002811	AT5G15200	Proliferating2	0.535719	177	Solyc01g010580	MZ1	0.321107	90
OG0001912	AT5G56670	Proliferating2	0.533525	181	Solyc12g008700	MZ1	0.314681	94
OG0003344	AT2G21580	Proliferating2	0.529815	183	Solyc02g069850	MZ1	0.267492	147
OG0001127	AT3G09200	Proliferating2	0.529571	184	Solyc05g054580	MZ1	0.323511	87
OG0000746	AT4G18730	Proliferating2	0.525819	188	Solyc12g010930	MZ1	0.258421	158
OG0002658	AT3G25520	Proliferating2	0.525321	189	Solyc06g007670	MZ1	0.312764	98
OG0001912	AT4G29390	Proliferating2	0.51753	198	Solyc12g008700	MZ1	0.314681	94
OG0002485	AT5G07090	Proliferating2	0.516825	199	Solyc02g070330	MZ1	0.304738	104
OG0004320	AT1G50490	Proliferating2	2.82619	4	Solyc11g065190	Ribzone	2.50639	9
OG0018387	AT3G02120	Proliferating2	2.79785	5	Solyc02g088830	Ribzone	3.1901	3
OG0007780	AT1G08560	Proliferating2	2.75988	6	Solyc06g053760	Ribzone	2.09246	19
OG0004872	AT4G23800	Proliferating2	2.50945	10	Solyc08g082070	Ribzone	2.4863	11
OG0012735	AT5G47500	Proliferating2	2.04642	12	Solyc08g078640	Ribzone	2.74616	6
OG0010764	AT1G02730	Proliferating2	2.00731	13	Solyc09g075550	Ribzone	2.34917	15
OG0007892	AT1G30690	Proliferating2	1.9974	14	Solyc02g070210	Ribzone	2.00129	26
OG0011776	AT3G25980	Proliferating2	1.96325	15	Solyc05g014370	Ribzone	2.42029	13
OG0000254	AT1G50010	Proliferating2	1.85292	17	Solyc02g087880	Ribzone	1.51684	43
OG0012542	AT4G15830	Proliferating2	1.79343	19	Solyc01g080750	Ribzone	2.43799	12
OG0004525	AT5G55180	Proliferating2	1.74293	20	Solyc12g014420	Ribzone	1.11818	82
OG0012635	AT5G44560	Proliferating2	1.61801	22	Solyc02g069680	Ribzone	1.56055	40
OG0018590	AT4G35100	Proliferating2	1.58867	23	Solyc10g055630	Ribzone	0.639705	150
OG0004527	AT2G25880	Proliferating2	1.58017	24	Solyc08g066050	Ribzone	1.59833	37
OG0004527	AT2G25880	Proliferating2	1.58017	24	Solyc12g095870	Ribzone	1.18655	74
OG0000416	AT1G01620	Proliferating2	1.53352	25	Solyc08g081190	Ribzone	0.726838	132
OG0000416	AT1G01620	Proliferating2	1.53352	25	Solyc12g056220	Ribzone	0.608518	153
OG0004527	AT4G32830	Proliferating2	1.51519	28	Solyc08g066050	Ribzone	1.59833	37
OG0004527	AT4G32830	Proliferating2	1.51519	28	Solyc12g095870	Ribzone	1.18655	74
OG0000101	AT2G29550	Proliferating2	1.46667	29	Solyc10g085020	Ribzone	1.20827	70
OG0006855	AT5G05080	Proliferating2	1.44386	30	Solyc10g081160	Ribzone	1.26177	65
OG0000254	AT1G04820	Proliferating2	1.42584	31	Solyc02g087880	Ribzone	1.51684	43
OG0010839	AT1G18370	Proliferating2	1.24007	34	Solyc03g119220	Ribzone	1.41296	53
OG0004320	AT3G20060	Proliferating2	1.239	35	Solyc11g065190	Ribzone	2.50639	9
OG0006422	AT3G23890	Proliferating2	1.13613	39	Solyc01g087500	Ribzone	0.59478	158
OG0000101	AT5G62700	Proliferating2	1.12228	40	Solyc10g085020	Ribzone	1.20827	70
OG0001561	AT4G05190	Proliferating2	1.11221	41	Solyc07g064030	Ribzone	1.2944	62
OG0000327	AT1G20090	Proliferating2	1.03137	45	Solyc02g083580	Ribzone	0.496603	168
OG0000416	AT4G00430	Proliferating2	1.01819	46	Solyc08g081190	Ribzone	0.726838	132
OG0000416	AT4G00430	Proliferating2	1.01819	46	Solyc12g056220	Ribzone	0.608518	153
OG0006957	AT5G60930	Proliferating2	1.00551	48	Solyc04g076310	Ribzone	0.605462	155
OG0006847	AT5G62550	Proliferating2	0.963294	49	Solyc06g070970	Ribzone	0.946935	99
OG0006847	AT5G62550	Proliferating2	0.963294	49	Solyc03g113090	Ribzone	0.607341	154
OG0002332	AT3G19590	Proliferating2	0.910889	51	Solyc01g107160	Ribzone	0.374125	197
OG0012365	AT4G12420	Proliferating2	0.88967	54	Solyc08g079090	Ribzone	0.666061	145
OG0003745	AT5G51600	Proliferating2	0.882128	56	Solyc03g007130	Ribzone	2.06259	21
OG0000101	AT5G62690	Proliferating2	0.841199	57	Solyc10g085020	Ribzone	1.20827	70
OG0000254	AT4G14960	Proliferating2	0.839878	58	Solyc02g087880	Ribzone	1.51684	43
OG0006585	AT4G03210	Proliferating2	0.825901	59	Solyc07g052980	Ribzone	0.53898	164
OG0002994	AT1G67230	Proliferating2	0.823107	60	Solyc03g045050	Ribzone	0.470772	173
OG0001148	AT3G09980	Proliferating2	0.721864	69	Solyc10g083520	Ribzone	0.936925	102
OG0001148	AT3G52920	Proliferating2	0.695613	72	Solyc10g083520	Ribzone	0.936925	102
OG0004872	AT4G23800	Proliferating3	2.78782	3	Solyc08g082070	Ribzone	2.4863	11
OG0000254	AT1G50010	Proliferating3	2.34474	7	Solyc02g087880	Ribzone	1.51684	43
OG0002961	AT1G44110	Proliferating3	2.19078	9	Solyc11g005090	Ribzone	0.796459	119
OG0000101	AT2G29550	Proliferating3	2.14122	10	Solyc10g085020	Ribzone	1.20827	70
OG0006847	AT5G62550	Proliferating3	2.08836	12	Solyc06g070970	Ribzone	0.946935	99
OG0006847	AT5G62550	Proliferating3	2.08836	12	Solyc03g113090	Ribzone	0.607341	154
OG0003615	AT4G28950	Proliferating3	1.81835	26	Solyc07g020800	Ribzone	0.75141	125
OG0004320	AT1G50490	Proliferating3	1.78486	29	Solyc11g065190	Ribzone	2.50639	9
OG0006422	AT3G23890	Proliferating3	1.77675	30	Solyc01g087500	Ribzone	0.59478	158
OG0018620	AT5G01910	Proliferating3	1.69378	34	Solyc06g082850	Ribzone	0.732205	130
OG0000254	AT1G04820	Proliferating3	1.67496	35	Solyc02g087880	Ribzone	1.51684	43
OG0000101	AT5G62700	Proliferating3	1.66548	36	Solyc10g085020	Ribzone	1.20827	70
OG0008166	AT2G26180	Proliferating3	1.61268	42	Solyc08g062940	Ribzone	0.667067	144
OG0002332	AT3G19590	Proliferating3	1.60333	44	Solyc01g107160	Ribzone	0.374125	197
OG0006957	AT5G60930	Proliferating3	1.59924	45	Solyc04g076310	Ribzone	0.605462	155
OG0000327	AT1G20090	Proliferating3	1.54217	52	Solyc02g083580	Ribzone	0.496603	168
OG0000418	AT1G28290	Proliferating3	1.52764	53	Solyc02g078040	Ribzone	0.676815	142
OG0014557	AT1G17480	Proliferating3	1.40718	64	Solyc03g121760	Ribzone	0.684387	139
OG0001561	AT4G05190	Proliferating3	1.40104	66	Solyc07g064030	Ribzone	1.2944	62
OG0011244	AT1G16070	Proliferating3	1.37922	70	Solyc03g117730	Ribzone	1.06933	84
OG0000254	AT4G14960	Proliferating3	1.35937	72	Solyc02g087880	Ribzone	1.51684	43
OG0014557	AT1G72670	Proliferating3	1.34793	75	Solyc03g121760	Ribzone	0.684387	139
OG0014982	AT3G01710	Proliferating3	1.32892	81	Solyc02g093720	Ribzone	1.19944	72
OG0005714	AT1G55330	Proliferating3	1.30269	85	Solyc10g078580	Ribzone	0.616891	152
OG0004647	AT4G33400	Proliferating3	1.23782	91	Solyc04g078940	Ribzone	0.725019	133
OG0001561	AT4G21270	Proliferating3	1.21918	96	Solyc07g064030	Ribzone	1.2944	62
OG0001148	AT3G52920	Proliferating3	1.18704	102	Solyc10g083520	Ribzone	0.936925	102
OG0002215	AT5G37010	Proliferating3	1.17452	103	Solyc02g081440	Ribzone	0.6833	141
OG0000101	AT5G62690	Proliferating3	1.17188	106	Solyc10g085020	Ribzone	1.20827	70
OG0000696	AT4G18570	Proliferating3	1.15734	108	Solyc02g077090	Ribzone	0.722862	134
OG0009795	AT5G48460	Proliferating3	1.1427	112	Solyc09g056170	Ribzone	0.439692	184
OG0008062	AT1G72250	Proliferating3	1.12706	113	Solyc12g011290	Ribzone	0.704951	136
OG0011921	AT3G20150	Proliferating3	1.12046	114	Solyc07g065210	Ribzone	1.20091	71
OG0000327	AT1G75840	Proliferating3	1.09793	118	Solyc02g083580	Ribzone	0.496603	168
OG0004527	AT4G32830	Proliferating3	1.02764	134	Solyc08g066050	Ribzone	1.59833	37
OG0004527	AT4G32830	Proliferating3	1.02764	134	Solyc12g095870	Ribzone	1.18655	74
OG0005552	AT1G59540	Proliferating3	1.00817	141	Solyc04g077540	Ribzone	0.534	165
OG0000416	AT1G01620	Proliferating3	0.928925	162	Solyc08g081190	Ribzone	0.726838	132
OG0000416	AT1G01620	Proliferating3	0.928925	162	Solyc12g056220	Ribzone	0.608518	153
OG0012172	AT3G19050	Proliferating3	0.910528	167	Solyc01g108670	Ribzone	1.02332	87
OG0002683	AT4G16120	Proliferating3	0.891562	177	Solyc01g065530	Ribzone	0.969993	95
OG0000132	AT5G02500	Proliferating3	0.851765	196	Solyc10g086410	Ribzone	0.425346	185
OG0000087	AT5G57350	Companion	3.51944	10	Solyc07g017780	Phloem	1.37863	122
OG0009480	AT5G04080	Companion	3.12246	21	Solyc10g084060	Phloem	4.41174	1
OG0009480	AT5G04080	Companion	3.12246	21	Solyc04g040210	Phloem	2.40865	31
OG0006935	AT5G59890	Companion	2.96054	23	Solyc09g010440	Phloem	1.26286	148
OG0008432	AT2G24940	Companion	2.44277	32	Solyc08g029160	Phloem	1.33874	129
OG0002082	AT5G40370	Companion	2.43296	34	Solyc06g005260	Phloem	1.26055	151
OG0018682	AT5G54940	Companion	2.41808	35	Solyc07g064620	Phloem	1.44089	114
OG0009213	AT4G34560	Companion	2.17085	45	Solyc01g109800	Phloem	1.21299	162
OG0000439	AT3G02470	Companion	2.16295	46	Solyc05g010420	Phloem	2.04391	49
OG0006408	AT3G21600	Companion	1.87431	60	Solyc12g008460	Phloem	1.1624	177
OG0005673	AT1G78580	Companion	1.39461	84	Solyc07g062140	Phloem	1.79693	71
OG0005601	AT1G78020	Companion	1.05737	112	Solyc05g051860	Phloem	1.14089	185
OG0008864	AT3G12490	Companion	1.05257	113	Solyc03g097270	Phloem	1.7001	77
OG0008535	AT3G17020	Companion	1.03765	116	Solyc01g059930	Phloem	1.35186	126
OG0000087	AT2G18960	Vascular1	2.30552	13	Solyc07g017780	Phloem	1.37863	122
OG0008432	AT2G24940	Vascular1	1.47295	33	Solyc08g029160	Phloem	1.33874	129
OG0008535	AT3G17020	Vascular1	1.37381	36	Solyc01g059930	Phloem	1.35186	126
OG0011408	AT4G37790	Vascular1	1.34476	37	Solyc02g091930	Phloem	1.70764	75
OG0006935	AT5G59890	Vascular1	1.1804	50	Solyc09g010440	Phloem	1.26286	148
OG0002082	AT5G40370	Vascular1	1.11576	60	Solyc06g005260	Phloem	1.26055	151
OG0000037	AT2G25450	Vascular1	1.00742	83	Solyc09g089580	Phloem	1.91265	59
OG0002564	AT4G39090	Vascular1	0.979955	94	Solyc01g110110	Phloem	1.71541	74
OG0003618	AT4G34050	Vascular1	0.949796	103	Solyc10g050160	Phloem	1.38436	119
OG0006631	AT4G38580	Vascular1	0.905756	120	Solyc01g111600	Phloem	1.13383	189
OG0011426	AT2G39900	Vascular1	0.836422	141	Solyc05g052780	Phloem	1.25241	154
OG0010574	AT1G74840	Vascular1	0.799728	156	Solyc03g113620	Phloem	2.11485	45
OG0010574	AT1G74840	Vascular1	0.799728	156	Solyc06g071230	Phloem	1.43461	115
OG0001133	AT2G38800	Vascular1	0.76509	166	Solyc01g068460	Phloem	1.27698	144
OG0000724	AT5G53160	Vascular1	0.732436	184	Solyc01g095700	Phloem	2.09194	47
OG0015159	AT5G19530	Xylem	3.70375	2	Solyc08g061970	Xylem	4.02531	3
OG0010945	AT1G75500	Xylem	3.35598	3	Solyc04g080940	Xylem	3.57718	6
OG0001811	AT3G18280	Xylem	3.23061	4	Solyc03g119210	Xylem	1.68226	60
OG0001811	AT3G18280	Xylem	3.23061	4	Solyc05g008895	Xylem	1.56408	67
OG0000316	AT2G21050	Xylem	2.78577	6	Solyc09g014380	Xylem	3.58533	5
OG0000316	AT2G21050	Xylem	2.78577	6	Solyc10g055260	Xylem	3.3172	9
OG0000316	AT2G21050	Xylem	2.78577	6	Solyc01g111310	Xylem	2.91841	13
OG0014679	AT1G28400	Xylem	2.28747	9	Solyc07g053640	Xylem	0.985616	150
OG0000589	AT4G24780	Xylem	2.20443	10	Solyc03g111690	Xylem	2.0769	31
OG0012833	AT5G61480	Xylem	1.94686	12	Solyc03g093330	Xylem	1.99686	34
OG0012833	AT5G61480	Xylem	1.94686	12	Solyc05g051640	Xylem	1.56999	66
OG0000316	AT2G38120	Xylem	1.86095	14	Solyc09g014380	Xylem	3.58533	5
OG0000316	AT2G38120	Xylem	1.86095	14	Solyc10g055260	Xylem	3.3172	9
OG0000316	AT2G38120	Xylem	1.86095	14	Solyc01g111310	Xylem	2.91841	13
OG0002434	AT2G33310	Xylem	1.80443	15	Solyc12g096980	Xylem	2.865	15
OG0002434	AT2G33310	Xylem	1.80443	15	Solyc09g090910	Xylem	1.04326	139
OG0001441	AT2G39700	Xylem	1.73784	17	Solyc06g051800	Xylem	1.7783	49
OG0011011	AT1G47670	Xylem	1.71327	18	Solyc04g079560	Xylem	1.81261	44
OG0018624	AT5G65670	Xylem	1.4886	23	Solyc04g076850	Xylem	2.34977	22
OG0002320	AT4G08685	Xylem	1.46478	24	Solyc05g051870	Xylem	1.21005	110
OG0000824	AT1G70370	Xylem	1.36898	26	Solyc03g114240	Xylem	2.41655	20
OG0001441	AT2G28950	Xylem	1.16075	32	Solyc06g051800	Xylem	1.7783	49
OG0000258	AT1G65960	Xylem	0.887367	46	Solyc11g011920	Xylem	1.17456	116
OG0000723	AT1G02500	Xylem	0.808462	53	Solyc09g008280	Xylem	1.55401	69
OG0000723	AT2G36880	Xylem	0.779559	57	Solyc09g008280	Xylem	1.55401	69
OG0000254	AT4G14960	Xylem	0.748387	65	Solyc04g077020	Xylem	1.15977	119
OG0002394	AT1G10200	Xylem	0.740089	68	Solyc04g077780	Xylem	1.44024	80
OG0000254	AT1G04820	Xylem	0.702136	73	Solyc04g077020	Xylem	1.15977	119
OG0000101	AT5G12250	Xylem	0.661946	78	Solyc06g035970	Xylem	1.45158	79
OG0001499	AT5G17920	Xylem	0.645889	83	Solyc10g081510	Xylem	0.868672	182
OG0014854	AT2G24765	Xylem	0.61898	94	Solyc07g006640	Xylem	0.855077	194
OG0000723	AT3G17390	Xylem	0.543173	121	Solyc09g008280	Xylem	1.55401	69
OG0000101	AT5G44340	Xylem	0.504974	144	Solyc06g035970	Xylem	1.45158	79

## Sheet: Rice_Tom_SHAP
Table S2: Pairwise comparison of rice vs Arabidopsis,
Orthogroup	Rice_MG	Rice_clusters	Rice_Shap_value	Rice_rank	Tom_MG	Tom_clusters	Tom_Shap_value	Tom_rank
OG0001727	Os05g0108600	Xylem	0.00599146	1	Solyc12g094700	Xylem	0.00086485	7
OG0001727	Os05g0108600	Xylem	0.00599146	1	Solyc04g082710	Xylem	0.000682863	9			Note: Epidermis1 = Hair in Tomato
OG0001069	Os07g0638500	Xylem	0.00295041	4	Solyc08g081790	Xylem	8.45675e-06	153			Note: Epidermis2 = Nonhair in Tomato
OG0011478	Os03g0194300	Xylem	0.00212669	6	Solyc07g048050	Xylem	0.000908063	6			Note: Trichoblast = Hair
OG0001227	Os03g0807500	Xylem	0.00199577	8	Solyc09g075810	Xylem	0.00119744	3			Note: Atrichoblast = Nonhair
OG0001727	Os01g0971400	Xylem	0.001937	9	Solyc12g094700	Xylem	0.00086485	7
OG0001727	Os01g0971400	Xylem	0.001937	9	Solyc04g082710	Xylem	0.000682863	9
OG0013176	Os10g0412700	Xylem	0.00187116	10	Solyc02g087520	Xylem	1.65284e-05	130
OG0003708	Os05g0163300	Xylem	0.000906531	14	Solyc06g075220	Xylem	7.26305e-05	67
OG0003708	Os05g0163300	Xylem	0.000906531	14	Solyc11g069250	Xylem	2.00765e-06	187
OG0010741	Os03g0329700	Xylem	0.000701798	20	Solyc10g085670	Xylem	0.000186917	33
OG0000327	Os02g0312600	Xylem	0.00057121	24	Solyc02g077400	Xylem	0.000250609	26
OG0001292	Os12g0204500	Xylem	0.000559409	26	Solyc01g103360	Xylem	1.51978e-05	135
OG0012971	Os10g0467800	Xylem	0.000492547	32	Solyc09g072820	Xylem	0.000669261	10
OG0011905	Os03g0216500	Xylem	0.000454005	33	Solyc01g087140	Xylem	0.000181011	36
OG0005437	Os03g0260600	Xylem	0.00040309	36	Solyc05g009880	Xylem	0.000490896	13
OG0000569	Os12g0443600	Xylem	0.000396	38	Solyc03g115380	Xylem	6.51767e-05	70
OG0009397	Os09g0422500	Xylem	0.000367071	39	Solyc07g005840	Xylem	0.000240131	28
OG0002024	Os11g0195800	Xylem	0.000350144	41	Solyc01g103700	Xylem	8.06651e-05	62
OG0001119	Os01g0842400	Xylem	0.000314518	42	Solyc09g011960	Xylem	2.95423e-05	107
OG0001119	Os01g0842400	Xylem	0.000314518	42	Solyc09g150105	Xylem	2.20753e-05	120
OG0001119	Os01g0842400	Xylem	0.000314518	42	Solyc09g010995	Xylem	2.19479e-05	121
OG0002814	Os07g0604400	Xylem	0.000308104	43	Solyc02g089130	Xylem	0.000255092	24
OG0002814	Os07g0604400	Xylem	0.000308104	43	Solyc03g070440	Xylem	0.000154674	42
OG0013079	Os03g0859900	Xylem	0.000279498	44	Solyc11g069840	Xylem	0.000449162	14
OG0011922	Os02g0532500	Xylem	0.000239783	50	Solyc11g006980	Xylem	2.46415e-05	112
OG0003016	Os05g0406800	Xylem	0.00021512	57	Solyc06g084420	Xylem	2.85792e-05	110
OG0000623	Os02g0114200	Xylem	0.000179851	62	Solyc06g074850	Xylem	0.000163061	38
OG0001727	Os02g0715000	Xylem	0.000121008	73	Solyc12g094700	Xylem	0.00086485	7
OG0001727	Os02g0715000	Xylem	0.000121008	73	Solyc04g082710	Xylem	0.000682863	9
OG0010770	Os04g0636400	Xylem	0.000115768	74	Solyc02g078910	Xylem	5.96668e-05	80
OG0005668	Os03g0640800	Xylem	0.000113474	76	Solyc02g024070	Xylem	8.15392e-05	60
OG0007840	Os06g0664300	Xylem	0.000109321	78	Solyc02g081970	Xylem	0.000102025	53
OG0000629	Os02g0158500	Xylem	0.00010557	80	Solyc02g093090	Xylem	3.30224e-05	102
OG0000629	Os02g0158500	Xylem	0.00010557	80	Solyc02g064945	Xylem	2.81521e-06	179
OG0000316	Os05g0447200	Xylem	9.78948e-05	83	Solyc01g111310	Xylem	7.01761e-05	68
OG0000316	Os05g0447200	Xylem	9.78948e-05	83	Solyc10g055260	Xylem	9.89626e-06	147
OG0004869	Os01g0703300	Xylem	9.23364e-05	85	Solyc12g015800	Xylem	3.80779e-05	97
OG0001320	Os03g0301800	Xylem	9.12502e-05	86	Solyc09g075480	Xylem	2.26973e-05	118
OG0006771	Os01g0634500	Xylem	7.72501e-05	91	Solyc02g085110	Xylem	8.32448e-05	58
OG0006771	Os01g0634500	Xylem	7.72501e-05	91	Solyc02g085120	Xylem	7.44504e-05	65
OG0006771	Os01g0634500	Xylem	7.72501e-05	91	Solyc02g062660	Xylem	1.98018e-05	124
OG0003860	Os03g0806800	Xylem	5.32541e-05	110	Solyc09g075980	Xylem	2.73672e-06	180
OG0000410	Os08g0554100	Xylem	5.01538e-05	112	Solyc04g076660	Xylem	1.85674e-05	127
OG0003607	Os05g0563000	Xylem	3.7026e-05	120	Solyc07g053590	Xylem	1.00746e-05	146
OG0003436	Os12g0128700	Xylem	2.69559e-05	134	Solyc10g081120	Xylem	1.86426e-05	126
OG0001812	Os01g0631900	Xylem	2.3043e-05	141	Solyc02g080880	Xylem	5.37557e-05	84
OG0002295	Os02g0767200	Xylem	2.14187e-05	144	Solyc12g088800	Xylem	3.7574e-05	98
OG0012909	Os11g0245500	Xylem	1.65463e-05	157	Solyc01g102720	Xylem	6.05456e-05	78
OG0000146	Os04g0536500	Xylem	1.56389e-05	159	Solyc02g084350	Xylem	0.00014341	45
OG0000146	Os04g0536500	Xylem	1.56389e-05	159	Solyc08g079120	Xylem	7.34618e-05	66
OG0000146	Os04g0536500	Xylem	1.56389e-05	159	Solyc06g034340	Xylem	6.06257e-05	77
OG0000146	Os04g0536500	Xylem	1.56389e-05	159	Solyc06g065410	Xylem	2.82022e-05	111
OG0000146	Os04g0536500	Xylem	1.56389e-05	159	Solyc03g083880	Xylem	4.96538e-06	166
OG0000146	Os04g0536500	Xylem	1.56389e-05	159	Solyc11g018660	Xylem	3.59034e-06	174
OG0007686	Os08g0531100	Xylem	1.44049e-05	162	Solyc05g015320	Xylem	0.000155344	40
OG0012674	Os11g0537350	Xylem	9.45874e-06	181	Solyc07g065330	Xylem	1.74113e-05	128
OG0002024	Os12g0182100	Xylem	8.95984e-06	183	Solyc01g103700	Xylem	8.06651e-05	62
OG0000316	Os03g0244600	Xylem	7.13578e-06	197	Solyc01g111310	Xylem	7.01761e-05	68
OG0000316	Os03g0244600	Xylem	7.13578e-06	197	Solyc10g055260	Xylem	9.89626e-06	147
OG0011043	Os03g0179100	Xylem	6.92217e-06	200	Solyc05g006500	Xylem	1.72533e-06	193
OG0009365	Os12g0160100	Phloem	0.00551726	1	Solyc08g062760	Phloem1	7.67918e-06	165
OG0005618	Os07g0531500	Phloem	0.00438594	6	Solyc02g080100	Phloem1	6.57641e-06	170
OG0000287	Os05g0438500	Phloem	0.00128179	16	Solyc09g010380	Phloem1	0.00136096	10
OG0005961	Os03g0267800	Phloem	0.00015339	46	Solyc05g052910	Phloem1	0.000177596	45
OG0004288	Os08g0112700	Phloem	0.000104928	56	Solyc11g032100	Phloem1	3.28227e-05	107
OG0004910	Os01g0191300	Phloem	8.07014e-05	63	Solyc05g026180	Phloem1	2.62102e-05	113
OG0000886	Os05g0112200	Phloem	7.56882e-05	65	Solyc06g076030	Phloem1	0.000422874	27
OG0011477	Os01g0176700	Phloem	7.44112e-05	66	Solyc12g006800	Phloem1	9.55634e-06	157
OG0000907	Os02g0642200	Phloem	6.58141e-05	68	Solyc01g094370	Phloem1	0.00171317	7
OG0000907	Os02g0642200	Phloem	6.58141e-05	68	Solyc06g035920	Phloem1	0.000613018	19
OG0001235	Os02g0508100	Phloem	5.59723e-05	73	Solyc02g094210	Phloem1	1.88203e-05	124
OG0001711	Os01g0788200	Phloem	5.4885e-05	74	Solyc02g080190	Phloem1	0.000811081	16
OG0005481	Os01g0699900	Phloem	4.33854e-05	84	Solyc02g071310	Phloem1	0.000725567	17
OG0009365	Os11g0157701	Phloem	4.32587e-05	85	Solyc08g062760	Phloem1	7.67918e-06	165
OG0013013	Os03g0100020	Phloem	3.88918e-05	88	Solyc08g076850	Phloem1	0.000907614	13
OG0000422	Os08g0420600	Phloem	3.23558e-05	96	Solyc05g006020	Phloem1	0.000153797	53
OG0001030	Os03g0130300	Phloem	2.6992e-05	105	Solyc04g008470	Phloem1	0.00332574	4
OG0003457	Os05g0126100	Phloem	1.24392e-05	123	Solyc04g049080	Phloem1	0.000984442	11
OG0000409	Os02g0686100	Phloem	5.28212e-06	158	Solyc02g082420	Phloem1	3.93335e-05	99
OG0006399	Os08g0450100	Phloem	3.82416e-06	168	Solyc07g017600	Phloem1	0.00244065	6
OG0009480	Os01g0948600	Phloem	0.00480961	4	Solyc04g040210	Phloem2	0.000625415	4
OG0009480	Os01g0948600	Phloem	0.00480961	4	Solyc10g084060	Phloem2	0.000126212	28
OG0001785	Os02g0132500	Phloem	0.00227921	11	Solyc01g109880	Phloem2	0.000154349	22
OG0001553	Os12g0147800	Phloem	0.000490156	26	Solyc06g074540	Phloem2	5.57607e-06	95
OG0006408	Os01g0723100	Phloem	0.000346736	31	Solyc12g008460	Phloem2	3.07711e-05	57
OG0000372	Os06g0614000	Phloem	0.000291198	34	Solyc03g077920	Phloem2	2.42952e-05	61
OG0002722	Os09g0536400	Phloem	0.000110945	54	Solyc02g083760	Phloem2	1.20208e-05	74
OG0001201	Os01g0257300	Phloem	0.000105259	55	Solyc01g066970	Phloem2	3.39437e-06	101
OG0009529	Os05g0500500	Phloem	5.20916e-05	77	Solyc07g064020	Phloem2	0.000247809	14
OG0000268	Os10g0489000	Phloem	4.83199e-05	82	Solyc04g008940	Phloem2	3.24348e-06	102
OG0000497	Os01g0612500	Phloem	3.80872e-05	89	Solyc12g042890	Phloem2	2.63373e-06	105
OG0000511	Os02g0531600	Phloem	3.18125e-05	98	Solyc09g009560	Phloem2	2.04036e-05	64
OG0000511	Os02g0531600	Phloem	3.18125e-05	98	Solyc03g026050	Phloem2	5.65988e-06	94
OG0001452	Os07g0100800	Phloem	1.95647e-05	107	Solyc03g096390	Phloem2	7.85246e-05	35
OG0000511	Os11g0152500	Phloem	1.86327e-05	109	Solyc09g009560	Phloem2	2.04036e-05	64
OG0000511	Os11g0152500	Phloem	1.86327e-05	109	Solyc03g026050	Phloem2	5.65988e-06	94
OG0003855	Os07g0619200	Phloem	1.22147e-05	125	Solyc04g079080	Phloem2	1.26976e-06	118
OG0013245	Os03g0858200	Phloem	7.2872e-06	144	Solyc04g081460	Phloem2	4.69389e-05	50
OG0000125	Os02g0120600	Phloem	7.21544e-06	145	Solyc02g083570	Phloem2	0.000155382	21
OG0000125	Os02g0120600	Phloem	7.21544e-06	145	Solyc03g033410	Phloem2	2.2702e-06	109
OG0003576	Os07g0685300	Phloem	4.62012e-06	162	Solyc10g083340	Phloem2	1.34975e-06	115
OG0008240	Os12g0596300	Phloem	4.10941e-06	166	Solyc01g109230	Phloem2	1.10607e-05	79
OG0007138	Os03g0389000	Phloem	3.12671e-06	172	Solyc05g052130	Phloem2	2.63332e-05	60
OG0000499	Os04g0554500	Cortex	0.00715498	5	Solyc08g078930	EXO_iCOR1	0.0137034	2
OG0000499	Os04g0554500	Cortex	0.00715498	5	Solyc08g078910	EXO_iCOR1	0.00906379	4
OG0000499	Os04g0554500	Cortex	0.00715498	5	Solyc08g078900	EXO_iCOR1	0.00422506	9
OG0007421	Os03g0186900	Cortex	0.00519083	9	Solyc04g076190	EXO_iCOR1	0.000415637	32
OG0007421	Os03g0186900	Cortex	0.00519083	9	Solyc12g087940	EXO_iCOR1	7.24926e-05	85
OG0008136	Os03g0708000	Cortex	0.00423698	12	Solyc07g014730	EXO_iCOR1	0.000176499	54
OG0000499	Os04g0554600	Cortex	0.00265566	13	Solyc08g078930	EXO_iCOR1	0.0137034	2
OG0000499	Os04g0554600	Cortex	0.00265566	13	Solyc08g078910	EXO_iCOR1	0.00906379	4
OG0000499	Os04g0554600	Cortex	0.00265566	13	Solyc08g078900	EXO_iCOR1	0.00422506	9
OG0004392	Os11g0643800	Cortex	0.00250071	14	Solyc09g074230	EXO_iCOR1	0.000290576	41
OG0004392	Os11g0643800	Cortex	0.00250071	14	Solyc01g080680	EXO_iCOR1	0.000135428	59
OG0006921	Os04g0640700	Cortex	0.00196219	20	Solyc01g104950	EXO_iCOR1	0.000295859	40
OG0000045	Os01g0179600	Cortex	0.000952684	28	Solyc07g008230	EXO_iCOR1	1.1194e-05	180
OG0001348	Os01g0652100	Cortex	0.000727067	32	Solyc03g006220	EXO_iCOR1	3.72744e-05	109
OG0003359	Os04g0605100	Cortex	0.000469319	42	Solyc08g006320	EXO_iCOR1	0.000781193	21
OG0003259	Os03g0338400	Cortex	0.000375375	46	Solyc06g050840	EXO_iCOR1	1.60166e-05	159
OG0002391	Os01g0598600	Cortex	0.000261533	51	Solyc01g096040	EXO_iCOR1	0.000277107	42
OG0008724	Os01g0957100	Cortex	0.000241865	55	Solyc09g098290	EXO_iCOR1	1.60856e-05	158
OG0006481	Os05g0534500	Cortex	6.95123e-05	90	Solyc12g006997	EXO_iCOR1	0.00183336	13
OG0006481	Os01g0719600	Cortex	6.30417e-05	92	Solyc12g006997	EXO_iCOR1	0.00183336	13
OG0001752	Os01g0636500	Cortex	5.75189e-05	100	Solyc05g005170	EXO_iCOR1	8.76511e-06	198
OG0006355	Os09g0508200	Cortex	4.08927e-05	106	Solyc02g094330	EXO_iCOR1	0.000470965	31
OG0003259	Os07g0676600	Cortex	3.2811e-05	111	Solyc06g050840	EXO_iCOR1	1.60166e-05	159
OG0004392	Os03g0363600	Cortex	2.57422e-05	119	Solyc09g074230	EXO_iCOR1	0.000290576	41
OG0004392	Os03g0363600	Cortex	2.57422e-05	119	Solyc01g080680	EXO_iCOR1	0.000135428	59
OG0001684	Os07g0561800	Cortex	5.23989e-06	170	Solyc05g053860	EXO_iCOR1	1.02964e-05	189
OG0000292	Os04g0233400	Cortex_like	0.000937783	15	Solyc09g007770	EXO_iCOR2	0.00191135	11
OG0000292	Os04g0233400	Cortex_like	0.000937783	15	Solyc06g011350	EXO_iCOR2	0.00124065	19
OG0000292	Os04g0233400	Cortex_like	0.000937783	15	Solyc09g007760	EXO_iCOR2	0.00106802	22
OG0000292	Os04g0233400	Cortex_like	0.000937783	15	Solyc10g084120	EXO_iCOR2	0.00104757	24
OG0001722	Os01g0667900	Cortex_like	0.00090298	17	Solyc07g053550	EXO_iCOR2	9.67889e-05	144
OG0003979	Os01g0884300	Cortex_like	0.000726942	24	Solyc06g060230	EXO_iCOR2	0.000146345	113
OG0000292	Os02g0629200	Cortex_like	0.000682819	29	Solyc09g007770	EXO_iCOR2	0.00191135	11
OG0000292	Os02g0629200	Cortex_like	0.000682819	29	Solyc06g011350	EXO_iCOR2	0.00124065	19
OG0000292	Os02g0629200	Cortex_like	0.000682819	29	Solyc09g007760	EXO_iCOR2	0.00106802	22
OG0000292	Os02g0629200	Cortex_like	0.000682819	29	Solyc10g084120	EXO_iCOR2	0.00104757	24
OG0001722	Os05g0563900	Cortex_like	0.000644848	30	Solyc07g053550	EXO_iCOR2	9.67889e-05	144
OG0008614	Os04g0683700	Cortex_like	0.000587971	36	Solyc06g035960	EXO_iCOR2	6.37493e-05	174
OG0002632	Os03g0290300	Cortex_like	0.000464325	48	Solyc06g051400	EXO_iCOR2	8.64546e-05	150
OG0001761	Os04g0373400	Cortex_like	0.000357168	58	Solyc03g118970	EXO_iCOR2	0.000269321	79
OG0003509	Os03g0618300	Cortex_like	0.000352966	60	Solyc01g108860	EXO_iCOR2	0.00516542	2
OG0001915	Os07g0480800	Cortex_like	0.000326878	64	Solyc09g008320	EXO_iCOR2	0.00156314	12
OG0002372	Os11g0599200	Cortex_like	0.000286959	70	Solyc01g095620	EXO_iCOR2	0.000207238	87
OG0001138	Os02g0605900	Cortex_like	0.000273166	74	Solyc04g072000	EXO_iCOR2	0.000887057	29
OG0000753	Os05g0571200	Cortex_like	0.000220128	99	Solyc01g095630	EXO_iCOR2	0.000134978	119
OG0004199	Os04g0119500	Cortex_like	0.000177814	105	Solyc08g083330	EXO_iCOR2	0.000510678	46
OG0005133	Os05g0542200	Cortex_like	8.45551e-05	151	Solyc03g083010	EXO_iCOR2	0.000330572	65
OG0001857	Os01g0570800	Cortex_like	7.36671e-05	159	Solyc12g008960	EXO_iCOR2	8.24052e-05	155
OG0000492	Os06g0681600	Exodermis	0.014651	1	Solyc07g052530	Exodermis1	0.0108018	2
OG0000492	Os06g0681600	Exodermis	0.014651	1	Solyc05g046030	Exodermis1	0.0065352	6
OG0000492	Os06g0681600	Exodermis	0.014651	1	Solyc05g046020	Exodermis1	0.00539908	7
OG0000492	Os06g0681600	Exodermis	0.014651	1	Solyc07g052540	Exodermis1	0.0051056	8
OG0000492	Os06g0681600	Exodermis	0.014651	1	Solyc05g046010	Exodermis1	0.00200368	19
OG0000492	Os06g0681600	Exodermis	0.014651	1	Solyc07g047740	Exodermis1	0.00161945	21
OG0000492	Os06g0681600	Exodermis	0.014651	1	Solyc07g049240	Exodermis1	0.000142466	74
OG0000773	Os05g0499300	Exodermis	0.00695496	3	Solyc08g075830	Exodermis1	0.00694505	5
OG0000773	Os05g0499300	Exodermis	0.00695496	3	Solyc12g005783	Exodermis1	0.00503028	10
OG0000773	Os05g0499300	Exodermis	0.00695496	3	Solyc12g005787	Exodermis1	0.00461041	12
OG0007742	Os03g0115700	Exodermis	0.00279365	8	Solyc08g082870	Exodermis1	5.59414e-05	94
OG0000426	Os07g0174900	Exodermis	0.000794054	17	Solyc03g005200	Exodermis1	0.00424563	13
OG0000426	Os07g0174900	Exodermis	0.000794054	17	Solyc09g065430	Exodermis1	0.00416979	14
OG0000426	Os07g0174900	Exodermis	0.000794054	17	Solyc09g065420	Exodermis1	0.00139691	25
OG0000426	Os07g0174900	Exodermis	0.000794054	17	Solyc09g065410	Exodermis1	0.000612296	42
OG0000426	Os07g0174900	Exodermis	0.000794054	17	Solyc09g082280	Exodermis1	0.000400584	52
OG0000426	Os07g0174900	Exodermis	0.000794054	17	Solyc06g054060	Exodermis1	8.53755e-05	83
OG0000426	Os07g0174900	Exodermis	0.000794054	17	Solyc06g054070	Exodermis1	2.52832e-05	132
OG0000417	Os01g0246700	Exodermis	0.000716532	18	Solyc07g051840	Exodermis1	1.33017e-05	172
OG0002623	Os01g0895300	Exodermis	0.000680267	21	Solyc09g019980	Exodermis1	0.000617315	41
OG0006369	Os07g0582400	Exodermis	0.000454096	27	Solyc01g109460	Exodermis1	0.000151664	73
OG0000162	Os02g0584700	Exodermis	0.000136707	51	Solyc07g056200	Exodermis1	3.79335e-05	115
OG0003728	Os11g0507200	Exodermis	5.16534e-05	79	Solyc03g097500	Exodermis1	0.00153295	22
OG0004898	Os08g0549000	Exodermis	3.07581e-05	107	Solyc01g111500	Exodermis1	1.63064e-05	157
OG0009752	Os11g0116300	Exodermis	8.69958e-06	167	Solyc05g052240	Exodermis1	8.98707e-05	82
OG0000532	Os01g0959200	Exodermis	6.2197e-06	184	Solyc04g071600	Exodermis1	4.60167e-05	104
OG0000532	Os01g0959200	Exodermis	6.2197e-06	184	Solyc04g071580	Exodermis1	8.57016e-06	197
OG0000929	Os02g0658100	Endodermis	0.00263156	7	Solyc12g044330	MZ	0.00134046	16
OG0002512	Os12g0567700	Endodermis	0.002042	10	Solyc07g063890	MZ	0.00110278	21
OG0002512	Os12g0567700	Endodermis	0.002042	10	Solyc10g006580	MZ	0.000935817	31
OG0002658	Os01g0896700	Endodermis	0.00186559	11	Solyc06g007670	MZ	0.000443419	89
OG0002658	Os01g0896700	Endodermis	0.00186559	11	Solyc06g082870	MZ	0.000253062	159
OG0001173	Os01g0834500	Endodermis	0.00165052	13	Solyc10g086020	MZ	0.00324525	2
OG0001173	Os01g0834500	Endodermis	0.00165052	13	Solyc10g084310	MZ	0.000658703	55
OG0001745	Os01g0276000	Endodermis	0.00158117	14	Solyc01g009100	MZ	0.000970839	29
OG0002288	Os05g0160200	Endodermis	0.00127362	16	Solyc01g068045	MZ	0.00103441	27
OG0002288	Os05g0160200	Endodermis	0.00127362	16	Solyc12g099025	MZ	0.000468654	83
OG0002288	Os05g0160200	Endodermis	0.00127362	16	Solyc12g098940	MZ	0.000420262	95
OG0004023	Os03g0408300	Endodermis	0.00117885	17	Solyc03g112360	MZ	0.000695132	49
OG0004023	Os03g0408300	Endodermis	0.00117885	17	Solyc06g071720	MZ	0.000335761	120
OG0001792	Os07g0208000	Endodermis	0.00116086	18	Solyc04g150158	MZ	0.000688904	51
OG0001185	Os07g0523700	Endodermis	0.00107036	20	Solyc03g112850	MZ	0.00190055	7
OG0001342	Os03g0794700	Endodermis	0.00104389	21	Solyc03g078290	MZ	0.00115158	20
OG0001342	Os03g0794700	Endodermis	0.00104389	21	Solyc06g073370	MZ	0.000834343	36
OG0000832	Os10g0466700	Endodermis	0.00104068	22	Solyc09g090610	MZ	0.000422369	91
OG0000832	Os10g0466700	Endodermis	0.00104068	22	Solyc06g083780	MZ	0.00021216	191
OG0004105	Os09g0258600	Endodermis	0.000865325	25	Solyc06g071880	MZ	0.00140746	15
OG0004105	Os09g0258600	Endodermis	0.000865325	25	Solyc06g071870	MZ	0.000795654	40
OG0006060	Os07g0546700	Endodermis	0.000808796	27	Solyc05g055640	MZ	0.0002112	195
OG0001423	Os05g0552300	Endodermis	0.000804025	28	Solyc03g119040	MZ	0.00104702	26
OG0001423	Os05g0552300	Endodermis	0.000804025	28	Solyc06g069010	MZ	0.00026719	154
OG0001485	Os11g0127900	Endodermis	0.000772047	30	Solyc04g026100	MZ	0.000234191	171
OG0002099	Os04g0349500	Endodermis	0.000759905	31	Solyc06g083180	MZ	0.000421492	94
OG0002099	Os04g0349500	Endodermis	0.000759905	31	Solyc09g057650	MZ	0.000333823	121
OG0006621	Os10g0563700	Endodermis	0.000748015	33	Solyc01g089970	MZ	0.00169546	11
OG0001454	Os08g0326400	Endodermis	0.000665184	37	Solyc06g050120	MZ	0.000566816	67
OG0001454	Os08g0326400	Endodermis	0.000665184	37	Solyc06g064470	MZ	0.000483906	80
OG0001454	Os08g0326400	Endodermis	0.000665184	37	Solyc01g097760	MZ	0.000284028	144
OG0003292	Os01g0100700	Endodermis	0.000650407	38	Solyc10g078620	MZ	0.000446273	88
OG0003292	Os01g0100700	Endodermis	0.000650407	38	Solyc11g042610	MZ	0.000390372	105
OG0001301	Os07g0229900	Endodermis	0.000609218	39	Solyc12g042650	MZ	0.000229763	176
OG0002679	Os03g0424500	Endodermis	0.00060781	40	Solyc12g039120	MZ	0.000488792	78
OG0002679	Os03g0424500	Endodermis	0.00060781	40	Solyc03g115360	MZ	0.000419948	97
OG0002643	Os03g0576700	Endodermis	0.000498162	43	Solyc08g075700	MZ	0.000925628	32
OG0008884	Os11g0579800	Endodermis	0.000492482	44	Solyc10g078540	MZ	0.000381889	108
OG0001745	Os05g0490100	Endodermis	0.000411718	47	Solyc01g009100	MZ	0.000970839	29
OG0001485	Os12g0124200	Endodermis	0.000400368	49	Solyc04g026100	MZ	0.000234191	171
OG0006060	Os11g0433900	Endodermis	0.00039575	50	Solyc05g055640	MZ	0.0002112	195
OG0001792	Os02g0478600	Endodermis	0.000386429	51	Solyc04g150158	MZ	0.000688904	51
OG0000930	Os04g0613600	Endodermis	0.000382241	52	Solyc06g073790	MZ	0.000563254	68
OG0000930	Os04g0613600	Endodermis	0.000382241	52	Solyc06g073800	MZ	0.000518164	73
OG0000930	Os04g0613600	Endodermis	0.000382241	52	Solyc12g042080	MZ	0.000424537	90
OG0002811	Os03g0154700	Endodermis	0.000343069	54	Solyc01g010580	MZ	0.000405065	100
OG0001045	Os03g0807800	Endodermis	0.000343049	55	Solyc04g074300	MZ	0.00233247	4
OG0001045	Os03g0807800	Endodermis	0.000343049	55	Solyc04g063290	MZ	0.00036737	115
OG0001806	Os02g0111700	Endodermis	0.000321932	58	Solyc03g120780	MZ	0.000773338	45
OG0001806	Os02g0111700	Endodermis	0.000321932	58	Solyc06g066660	MZ	0.000650563	57
OG0000924	Os08g0234000	Endodermis	0.000321021	59	Solyc07g008370	MZ	0.000578079	66
OG0002485	Os01g0358400	Endodermis	0.000298055	61	Solyc02g070340	MZ	0.000371389	112
OG0002485	Os01g0358400	Endodermis	0.000298055	61	Solyc02g070330	MZ	0.000283541	145
OG0000930	Os07g0565100	Endodermis	0.000265366	65	Solyc06g073790	MZ	0.000563254	68
OG0000930	Os07g0565100	Endodermis	0.000265366	65	Solyc06g073800	MZ	0.000518164	73
OG0000930	Os07g0565100	Endodermis	0.000265366	65	Solyc12g042080	MZ	0.000424537	90
OG0003476	Os05g0557000	Endodermis	0.000254791	67	Solyc08g077720	MZ	0.000798358	39
OG0001328	Os08g0156800	Endodermis	0.000247193	68	Solyc05g007560	MZ	0.000236345	168
OG0001454	Os09g0507800	Endodermis	0.000246772	69	Solyc06g050120	MZ	0.000566816	67
OG0001454	Os09g0507800	Endodermis	0.000246772	69	Solyc06g064470	MZ	0.000483906	80
OG0001454	Os09g0507800	Endodermis	0.000246772	69	Solyc01g097760	MZ	0.000284028	144
OG0002485	Os02g0105900	Endodermis	0.000219743	73	Solyc02g070340	MZ	0.000371389	112
OG0002485	Os02g0105900	Endodermis	0.000219743	73	Solyc02g070330	MZ	0.000283541	145
OG0002539	Os04g0376000	Endodermis	0.000207145	76	Solyc04g010240	MZ	0.00108666	23
OG0002539	Os04g0376000	Endodermis	0.000207145	76	Solyc06g075620	MZ	0.000242093	163
OG0002539	Os04g0376000	Endodermis	0.000207145	76	Solyc05g054810	MZ	0.000198425	200
OG0002811	Os11g0602600	Endodermis	0.000189753	80	Solyc01g010580	MZ	0.000405065	100
OG0000932	Os02g0287000	Endodermis	0.000186294	81	Solyc06g072490	MZ	0.000771463	46
OG0000932	Os02g0287000	Endodermis	0.000186294	81	Solyc09g082520	MZ	0.000241596	164
OG0001913	Os03g0109500	Endodermis	0.000171223	84	Solyc11g006690	MZ	0.000402562	102
OG0001913	Os03g0109500	Endodermis	0.000171223	84	Solyc05g055230	MZ	0.000237434	166
OG0001374	Os04g0473400	Endodermis	0.000170037	86	Solyc11g012110	MZ	0.000793001	42
OG0002658	Os01g0896800	Endodermis	0.000164893	87	Solyc06g007670	MZ	0.000443419	89
OG0002658	Os01g0896800	Endodermis	0.000164893	87	Solyc06g082870	MZ	0.000253062	159
OG0001759	Os02g0321900	Endodermis	0.00016432	88	Solyc11g068420	MZ	0.000291151	140
OG0001863	Os04g0501000	Endodermis	0.000159493	90	Solyc10g086330	MZ	0.000240551	165
OG0001863	Os04g0501000	Endodermis	0.000159493	90	Solyc09g005720	MZ	0.000221969	182
OG0001863	Os01g0348700	Endodermis	0.000157762	92	Solyc10g086330	MZ	0.000240551	165
OG0001863	Os01g0348700	Endodermis	0.000157762	92	Solyc09g005720	MZ	0.000221969	182
OG0001732	Os05g0565000	Endodermis	0.000154611	94	Solyc02g070640	MZ	0.000460343	85
OG0001732	Os05g0565000	Endodermis	0.000154611	94	Solyc08g016180	MZ	0.000300939	134
OG0001732	Os05g0565000	Endodermis	0.000154611	94	Solyc02g070650	MZ	0.00021207	192
OG0003432	Os03g0249400	Endodermis	0.000151988	96	Solyc01g096580	MZ	0.00183275	9
OG0003432	Os03g0249400	Endodermis	0.000151988	96	Solyc01g096590	MZ	0.000448445	87
OG0003540	Os01g0304000	Endodermis	0.000151676	97	Solyc05g053440	MZ	0.000940769	30
OG0001208	Os01g0962600	Endodermis	0.000148236	98	Solyc01g099670	MZ	0.000757652	48
OG0000821	Os03g0851000	Endodermis	0.000144134	99	Solyc07g008720	MZ	0.00037632	109
OG0003151	Os03g0297100	Endodermis	0.0001395	100	Solyc06g069090	MZ	0.00131412	17
OG0001342	Os07g0173501	Endodermis	0.000121459	106	Solyc03g078290	MZ	0.00115158	20
OG0001342	Os07g0173501	Endodermis	0.000121459	106	Solyc06g073370	MZ	0.000834343	36
OG0001378	Os03g0182600	Endodermis	0.000105948	111	Solyc06g072120	MZ	0.000920841	33
OG0001378	Os03g0182600	Endodermis	0.000105948	111	Solyc03g019780	MZ	0.000579836	65
OG0002631	Os11g0151300	Endodermis	9.56568e-05	116	Solyc02g092430	MZ	0.00032511	126
OG0002614	Os03g0341100	Endodermis	9.46308e-05	118	Solyc09g075290	MZ	0.000594658	61
OG0001732	Os01g0752300	Endodermis	8.21017e-05	123	Solyc02g070640	MZ	0.000460343	85
OG0001732	Os01g0752300	Endodermis	8.21017e-05	123	Solyc08g016180	MZ	0.000300939	134
OG0001732	Os01g0752300	Endodermis	8.21017e-05	123	Solyc02g070650	MZ	0.00021207	192
OG0003604	Os09g0502000	Endodermis	7.77824e-05	126	Solyc08g006900	MZ	0.000232501	173
OG0000932	Os12g0406200	Endodermis	7.38452e-05	128	Solyc06g072490	MZ	0.000771463	46
OG0000932	Os12g0406200	Endodermis	7.38452e-05	128	Solyc09g082520	MZ	0.000241596	164
OG0001423	Os01g0686800	Endodermis	7.22466e-05	129	Solyc03g119040	MZ	0.00104702	26
OG0001423	Os01g0686800	Endodermis	7.22466e-05	129	Solyc06g069010	MZ	0.00026719	154
OG0000627	Os02g0229000	Endodermis	7.01879e-05	130	Solyc09g065330	MZ	0.0019584	6
OG0000627	Os02g0229000	Endodermis	7.01879e-05	130	Solyc06g084230	MZ	0.000635007	58
OG0000627	Os02g0229000	Endodermis	7.01879e-05	130	Solyc01g097870	MZ	0.000271016	153
OG0001378	Os07g0616600	Endodermis	5.59438e-05	140	Solyc06g072120	MZ	0.000920841	33
OG0001378	Os07g0616600	Endodermis	5.59438e-05	140	Solyc03g019780	MZ	0.000579836	65
OG0001531	Os03g0796501	Endodermis	5.26347e-05	145	Solyc10g084350	MZ	0.000501625	74
OG0001531	Os03g0796501	Endodermis	5.26347e-05	145	Solyc10g086010	MZ	0.00038912	106
OG0001531	Os03g0796501	Endodermis	5.26347e-05	145	Solyc09g007250	MZ	0.000262413	156
OG0000746	Os01g0205500	Endodermis	4.89866e-05	146	Solyc10g007980	MZ	0.000687164	52
OG0000746	Os01g0205500	Endodermis	4.89866e-05	146	Solyc07g055230	MZ	0.000398464	103
OG0000746	Os01g0205500	Endodermis	4.89866e-05	146	Solyc02g086240	MZ	0.000278723	148
OG0002517	Os10g0462900	Endodermis	4.63162e-05	148	Solyc05g053470	MZ	0.000463491	84
OG0001759	Os01g0860300	Endodermis	4.53833e-05	150	Solyc11g068420	MZ	0.000291151	140
OG0000930	Os04g0502300	Endodermis	3.24914e-05	159	Solyc06g073790	MZ	0.000563254	68
OG0000930	Os04g0502300	Endodermis	3.24914e-05	159	Solyc06g073800	MZ	0.000518164	73
OG0000930	Os04g0502300	Endodermis	3.24914e-05	159	Solyc12g042080	MZ	0.000424537	90
OG0001127	Os11g0135400	Endodermis	1.95429e-05	178	Solyc05g054580	MZ	0.000460166	86
OG0004709	Os03g0370500	Endodermis	9.98021e-06	195	Solyc02g081810	MZ	0.000343789	117
OG0012250	Os03g0241200	Meristem	0.00213395	2	Solyc09g011420	MZ	0.000327088	125
OG0004675	Os10g0411700	Meristem	0.00130371	6	Solyc02g021400	MZ	0.000367691	114
OG0000832	Os03g0139100	Meristem	0.00123989	8	Solyc09g090610	MZ	0.000422369	91
OG0000832	Os03g0139100	Meristem	0.00123989	8	Solyc06g083780	MZ	0.00021216	191
OG0002679	Os03g0424800	Meristem	0.00113006	9	Solyc12g039120	MZ	0.000488792	78
OG0002679	Os03g0424800	Meristem	0.00113006	9	Solyc03g115360	MZ	0.000419948	97
OG0001954	Os08g0117300	Meristem	0.001033	10	Solyc11g072260	MZ	0.0011982	19
OG0001954	Os08g0117300	Meristem	0.001033	10	Solyc01g091220	MZ	0.000216696	187
OG0001993	Os05g0597100	Meristem	0.000894842	11	Solyc09g009030	MZ	0.000213543	190
OG0002803	Os08g0116500	Meristem	0.000845932	13	Solyc01g104370	MZ	0.0012705	18
OG0006226	Os02g0478700	Meristem	0.000835532	14	Solyc01g008090	MZ	0.000271639	152
OG0002614	Os05g0155100	Meristem	0.000819685	15	Solyc09g075290	MZ	0.000594658	61
OG0001173	Os03g0818400	Meristem	0.000760768	16	Solyc10g086020	MZ	0.00324525	2
OG0001173	Os03g0818400	Meristem	0.000760768	16	Solyc10g084310	MZ	0.000658703	55
OG0001567	Os03g0598800	Meristem	0.0007257	17	Solyc06g060400	MZ	0.00101039	28
OG0001567	Os03g0598800	Meristem	0.0007257	17	Solyc06g064630	MZ	0.000901494	34
OG0001567	Os03g0598800	Meristem	0.0007257	17	Solyc04g008460	MZ	0.000407058	99
OG0002612	Os03g0756000	Meristem	0.000638892	20	Solyc05g053670	MZ	0.000417348	98
OG0003432	Os10g0170200	Meristem	0.000566714	23	Solyc01g096580	MZ	0.00183275	9
OG0003432	Os10g0170200	Meristem	0.000566714	23	Solyc01g096590	MZ	0.000448445	87
OG0000832	Os02g0814700	Meristem	0.000552868	25	Solyc09g090610	MZ	0.000422369	91
OG0000832	Os02g0814700	Meristem	0.000552868	25	Solyc06g083780	MZ	0.00021216	191
OG0001913	Os10g0411800	Meristem	0.000546095	26	Solyc11g006690	MZ	0.000402562	102
OG0001913	Os10g0411800	Meristem	0.000546095	26	Solyc05g055230	MZ	0.000237434	166
OG0001717	Os03g0337800	Meristem	0.000545728	27	Solyc09g075430	MZ	0.000684526	54
OG0000377	Os01g0191100	Meristem	0.000489848	29	Solyc06g074430	MZ	0.00170933	10
OG0003344	Os08g0559200	Meristem	0.000467805	30	Solyc02g069850	MZ	0.00401704	1
OG0003344	Os08g0559200	Meristem	0.000467805	30	Solyc10g052660	MZ	0.000549169	69
OG0001301	Os07g0150200	Meristem	0.000464368	31	Solyc12g042650	MZ	0.000229763	176
OG0001290	Os03g0141000	Meristem	0.000440232	33	Solyc10g078960	MZ	0.000490263	76
OG0001290	Os03g0141000	Meristem	0.000440232	33	Solyc10g080590	MZ	0.000404598	101
OG0003610	Os07g0622100	Meristem	0.000419785	34	Solyc12g096300	MZ	0.000689378	50
OG0003610	Os07g0622100	Meristem	0.000419785	34	Solyc08g074240	MZ	0.000225736	179
OG0003610	Os07g0622100	Meristem	0.000419785	34	Solyc08g006040	MZ	0.000217456	186
OG0000746	Os05g0207300	Meristem	0.000386098	35	Solyc10g007980	MZ	0.000687164	52
OG0000746	Os05g0207300	Meristem	0.000386098	35	Solyc07g055230	MZ	0.000398464	103
OG0000746	Os05g0207300	Meristem	0.000386098	35	Solyc02g086240	MZ	0.000278723	148
OG0000525	Os03g0279200	Meristem	0.000355971	37	Solyc01g099410	MZ	0.000795143	41
OG0000525	Os03g0279200	Meristem	0.000355971	37	Solyc09g010400	MZ	0.00042232	92
OG0000525	Os03g0279200	Meristem	0.000355971	37	Solyc11g073250	MZ	0.000302902	133
OG0000525	Os03g0279200	Meristem	0.000355971	37	Solyc11g073260	MZ	0.000229737	177
OG0001061	Os12g0167900	Meristem	0.000355592	38	Solyc01g104590	MZ	0.000762436	47
OG0002288	Os01g0328400	Meristem	0.000354484	39	Solyc01g068045	MZ	0.00103441	27
OG0002288	Os01g0328400	Meristem	0.000354484	39	Solyc12g099025	MZ	0.000468654	83
OG0002288	Os01g0328400	Meristem	0.000354484	39	Solyc12g098940	MZ	0.000420262	95
OG0002550	Os02g0622300	Meristem	0.000330955	42	Solyc09g066430	MZ	0.0029036	3
OG0002550	Os02g0622300	Meristem	0.000330955	42	Solyc06g083820	MZ	0.000799695	38
OG0000627	Os01g0723200	Meristem	0.000313342	43	Solyc09g065330	MZ	0.0019584	6
OG0000627	Os01g0723200	Meristem	0.000313342	43	Solyc06g084230	MZ	0.000635007	58
OG0000627	Os01g0723200	Meristem	0.000313342	43	Solyc01g097870	MZ	0.000271016	153
OG0000932	Os03g0200500	Meristem	0.000302874	44	Solyc06g072490	MZ	0.000771463	46
OG0000932	Os03g0200500	Meristem	0.000302874	44	Solyc09g082520	MZ	0.000241596	164
OG0001531	Os07g0180900	Meristem	0.000189135	59	Solyc10g084350	MZ	0.000501625	74
OG0001531	Os07g0180900	Meristem	0.000189135	59	Solyc10g086010	MZ	0.00038912	106
OG0001531	Os07g0180900	Meristem	0.000189135	59	Solyc09g007250	MZ	0.000262413	156
OG0001374	Os02g0591700	Meristem	0.000171215	61	Solyc11g012110	MZ	0.000793001	42
OG0003151	Os05g0346300	Meristem	0.000163805	62	Solyc06g069090	MZ	0.00131412	17
OG0004489	Os10g0557600	Meristem	0.000163357	63	Solyc01g090760	MZ	0.00107813	24
OG0002622	Os07g0674200	Meristem	0.00016252	64	Solyc01g099830	MZ	0.000521619	72
OG0003292	Os11g0482000	Meristem	0.000161453	66	Solyc10g078620	MZ	0.000446273	88
OG0003292	Os11g0482000	Meristem	0.000161453	66	Solyc11g042610	MZ	0.000390372	105
OG0001127	Os08g0130500	Meristem	0.000157364	67	Solyc05g054580	MZ	0.000460166	86
OG0000955	Os05g0589600	Meristem	0.00015643	68	Solyc08g007220	MZ	0.000218198	183
OG0000056	Os04g0583600	Meristem	0.000130959	75	Solyc04g011390	MZ	0.000829532	37
OG0000056	Os04g0583600	Meristem	0.000130959	75	Solyc11g072860	MZ	0.000596368	60
OG0000056	Os04g0583600	Meristem	0.000130959	75	Solyc06g075830	MZ	0.00032207	127
OG0000056	Os04g0583600	Meristem	0.000130959	75	Solyc06g005430	MZ	0.000299782	136
OG0000056	Os04g0583600	Meristem	0.000130959	75	Solyc06g075930	MZ	0.000284809	143
OG0000056	Os04g0583600	Meristem	0.000130959	75	Solyc05g054610	MZ	0.000230497	175
OG0000056	Os04g0583600	Meristem	0.000130959	75	Solyc06g075850	MZ	0.000205695	197
OG0002605	Os01g0916600	Meristem	0.000129974	76	Solyc05g053780	MZ	0.000374959	110
OG0001017	Os05g0556900	Meristem	0.000127728	79	Solyc03g096360	MZ	0.000779258	44
OG0001017	Os05g0556900	Meristem	0.000127728	79	Solyc05g052810	MZ	0.000250109	160
OG0002643	Os06g0115500	Meristem	0.000122616	82	Solyc08g075700	MZ	0.000925628	32
OG0000620	Os05g0373700	Meristem	0.000117864	86	Solyc03g080160	MZ	0.00141074	14
OG0000056	Os02g0684500	Meristem	0.000100995	97	Solyc04g011390	MZ	0.000829532	37
OG0000056	Os02g0684500	Meristem	0.000100995	97	Solyc11g072860	MZ	0.000596368	60
OG0000056	Os02g0684500	Meristem	0.000100995	97	Solyc06g075830	MZ	0.00032207	127
OG0000056	Os02g0684500	Meristem	0.000100995	97	Solyc06g005430	MZ	0.000299782	136
OG0000056	Os02g0684500	Meristem	0.000100995	97	Solyc06g075930	MZ	0.000284809	143
OG0000056	Os02g0684500	Meristem	0.000100995	97	Solyc05g054610	MZ	0.000230497	175
OG0000056	Os02g0684500	Meristem	0.000100995	97	Solyc06g075850	MZ	0.000205695	197
OG0000056	Os05g0466600	Meristem	9.5078e-05	103	Solyc04g011390	MZ	0.000829532	37
OG0000056	Os05g0466600	Meristem	9.5078e-05	103	Solyc11g072860	MZ	0.000596368	60
OG0000056	Os05g0466600	Meristem	9.5078e-05	103	Solyc06g075830	MZ	0.00032207	127
OG0000056	Os05g0466600	Meristem	9.5078e-05	103	Solyc06g005430	MZ	0.000299782	136
OG0000056	Os05g0466600	Meristem	9.5078e-05	103	Solyc06g075930	MZ	0.000284809	143
OG0000056	Os05g0466600	Meristem	9.5078e-05	103	Solyc05g054610	MZ	0.000230497	175
OG0000056	Os05g0466600	Meristem	9.5078e-05	103	Solyc06g075850	MZ	0.000205695	197
OG0000056	Os01g0835900	Meristem	9.25436e-05	107	Solyc04g011390	MZ	0.000829532	37
OG0000056	Os01g0835900	Meristem	9.25436e-05	107	Solyc11g072860	MZ	0.000596368	60
OG0000056	Os01g0835900	Meristem	9.25436e-05	107	Solyc06g075830	MZ	0.00032207	127
OG0000056	Os01g0835900	Meristem	9.25436e-05	107	Solyc06g005430	MZ	0.000299782	136
OG0000056	Os01g0835900	Meristem	9.25436e-05	107	Solyc06g075930	MZ	0.000284809	143
OG0000056	Os01g0835900	Meristem	9.25436e-05	107	Solyc05g054610	MZ	0.000230497	175
OG0000056	Os01g0835900	Meristem	9.25436e-05	107	Solyc06g075850	MZ	0.000205695	197
OG0003049	Os03g0352300	Meristem	8.44854e-05	111	Solyc01g100570	MZ	0.000317088	128
OG0001111	Os08g0129200	Meristem	8.21486e-05	113	Solyc01g111300	MZ	0.000212061	193
OG0009408	Os06g0274200	Meristem	7.96286e-05	117	Solyc12g038980	MZ	0.000590023	63
OG0000056	Os03g0119900	Meristem	7.79315e-05	119	Solyc04g011390	MZ	0.000829532	37
OG0000056	Os03g0119900	Meristem	7.79315e-05	119	Solyc11g072860	MZ	0.000596368	60
OG0000056	Os03g0119900	Meristem	7.79315e-05	119	Solyc06g075830	MZ	0.00032207	127
OG0000056	Os03g0119900	Meristem	7.79315e-05	119	Solyc06g005430	MZ	0.000299782	136
OG0000056	Os03g0119900	Meristem	7.79315e-05	119	Solyc06g075930	MZ	0.000284809	143
OG0000056	Os03g0119900	Meristem	7.79315e-05	119	Solyc05g054610	MZ	0.000230497	175
OG0000056	Os03g0119900	Meristem	7.79315e-05	119	Solyc06g075850	MZ	0.000205695	197
OG0000821	Os10g0483000	Meristem	7.74087e-05	120	Solyc07g008720	MZ	0.00037632	109
OG0001185	Os07g0450000	Meristem	7.72587e-05	121	Solyc03g112850	MZ	0.00190055	7
OG0001293	Os08g0427700	Meristem	7.41784e-05	122	Solyc10g006560	MZ	0.000387483	107
OG0001293	Os08g0427700	Meristem	7.41784e-05	122	Solyc12g005270	MZ	0.000342591	118
OG0002099	Os02g0489400	Meristem	6.78159e-05	128	Solyc06g083180	MZ	0.000421492	94
OG0002099	Os02g0489400	Meristem	6.78159e-05	128	Solyc09g057650	MZ	0.000333823	121
OG0010894	Os02g0682600	Meristem	5.65743e-05	143	Solyc08g083380	MZ	0.000298575	137
OG0000377	Os02g0529700	Meristem	5.36468e-05	148	Solyc06g074430	MZ	0.00170933	10
OG0002315	Os12g0530000	Meristem	5.11425e-05	153	Solyc09g082710	MZ	0.000421882	93
OG0002315	Os12g0530000	Meristem	5.11425e-05	153	Solyc03g005220	MZ	0.000300452	135
OG0000591	Os02g0103700	Meristem	4.46437e-05	163	Solyc06g073310	MZ	0.00204629	5
OG0000591	Os02g0103700	Meristem	4.46437e-05	163	Solyc08g014550	MZ	0.000275023	150
OG0000056	Os09g0433600	Meristem	4.02312e-05	174	Solyc04g011390	MZ	0.000829532	37
OG0000056	Os09g0433600	Meristem	4.02312e-05	174	Solyc11g072860	MZ	0.000596368	60
OG0000056	Os09g0433600	Meristem	4.02312e-05	174	Solyc06g075830	MZ	0.00032207	127
OG0000056	Os09g0433600	Meristem	4.02312e-05	174	Solyc06g005430	MZ	0.000299782	136
OG0000056	Os09g0433600	Meristem	4.02312e-05	174	Solyc06g075930	MZ	0.000284809	143
OG0000056	Os09g0433600	Meristem	4.02312e-05	174	Solyc05g054610	MZ	0.000230497	175
OG0000056	Os09g0433600	Meristem	4.02312e-05	174	Solyc06g075850	MZ	0.000205695	197
OG0002047	Os09g0491772	Meristem	3.83871e-05	179	Solyc01g106210	MZ	0.000217829	184
OG0000062	Os06g0160001	Meristem	3.67418e-05	188	Solyc01g074000	MZ	0.000790001	43
OG0000062	Os06g0160001	Meristem	3.67418e-05	188	Solyc02g077480	MZ	0.000656958	56
OG0000062	Os06g0160001	Meristem	3.67418e-05	188	Solyc10g008910	MZ	0.000591094	62
OG0000062	Os06g0160001	Meristem	3.67418e-05	188	Solyc01g079110	MZ	0.000468798	82
OG0000955	Os01g0603000	Meristem	3.50105e-05	194	Solyc08g007220	MZ	0.000218198	183
OG0004709	Os07g0636000	Meristem	3.42183e-05	197	Solyc02g081810	MZ	0.000343789	117
OG0003086	Os02g0663800	Trichoblast1	0.00761177	1	Solyc06g035980	Epidermis1	0.0108746	1
OG0003086	Os04g0555700	Trichoblast1	0.00360364	7	Solyc06g035980	Epidermis1	0.0108746	1
OG0001974	Os10g0578200	Trichoblast1	0.00198678	13	Solyc08g005280	Epidermis1	9.55615e-05	106
OG0001974	Os10g0578200	Trichoblast1	0.00198678	13	Solyc03g097050	Epidermis1	3.51347e-05	136
OG0001577	Os12g0165600	Trichoblast1	0.000262322	58	Solyc02g094370	Epidermis1	2.06273e-05	155
OG0007946	Os10g0535900	Trichoblast1	0.000166049	78	Solyc08g080060	Epidermis1	0.00140012	34
OG0001577	Os11g0167600	Trichoblast1	8.49953e-05	106	Solyc02g094370	Epidermis1	2.06273e-05	155
OG0003307	Os03g0719850	Trichoblast1	6.20609e-05	121	Solyc03g059080	Epidermis1	0.00112526	36
OG0001353	Os02g0272300	Trichoblast1	5.17437e-05	130	Solyc03g120650	Epidermis1	0.000311483	76
OG0001353	Os02g0272300	Trichoblast1	5.17437e-05	130	Solyc06g066650	Epidermis1	0.000137217	98
OG0001399	Os04g0472300	Trichoblast1	4.92231e-05	135	Solyc07g065120	Epidermis1	0.000336778	74
OG0001509	Os01g0835500	Trichoblast1	4.42016e-05	140	Solyc06g075570	Epidermis1	0.000365584	70
OG0000175	Os01g0533900	Trichoblast1	4.19456e-05	145	Solyc06g009280	Epidermis1	0.000134335	100
OG0007857	Os10g0550300	Trichoblast1	3.51432e-05	155	Solyc01g094610	Epidermis1	0.000179531	92
OG0007892	Os06g0671800	Trichoblast1	3.29573e-05	156	Solyc09g025230	Epidermis1	1.05485e-05	182
OG0008143	Os04g0381700	Trichoblast1	1.86608e-05	189	Solyc06g051550	Epidermis1	0.000137859	97
OG0011021	Os07g0499500	Trichoblast2	0.00747182	3	Solyc02g082090	Epidermis1	0.00628933	3
OG0011073	Os04g0674800	Trichoblast2	0.00501196	4	Solyc02g014220	Epidermis1	0.00462242	7
OG0001117	Os10g0122600	Trichoblast2	0.00388188	7	Solyc01g109860	Epidermis1	0.000495504	60
OG0011518	Os01g0232000	Trichoblast2	0.000924772	17	Solyc08g066840	Epidermis1	0.000662394	54
OG0000287	Os05g0114000	Trichoblast2	0.000388958	33	Solyc12g055830	Epidermis1	0.00607438	4
OG0007077	Os11g0654400	Trichoblast2	0.000299297	37	Solyc10g086620	Epidermis1	3.63219e-05	134
OG0012906	Os01g0806400	Trichoblast2	1.71546e-05	114	Solyc07g065420	Epidermis1	0.00437215	9
OG0004232	Os11g0232100	Trichoblast2	4.63193e-06	181	Solyc06g065260	Epidermis1	3.64879e-05	133
OG0012751	Os03g0759600	Trichoblast2	4.01284e-06	192	Solyc03g115710	Epidermis1	0.000322064	75
OG0000232	Os05g0574100	Trichoblast2	3.32211e-06	196	Solyc02g077430	Epidermis1	2.04633e-05	156
OG0000500	Os03g0223400	Atrichoblast	0.00724782	1	Solyc11g011380	Epidermis1	0.00408358	11
OG0000500	Os03g0223400	Atrichoblast	0.00724782	1	Solyc04g014510	Epidermis1	0.00161356	29
OG0002322	Os03g0195800	Atrichoblast	0.00313017	10	Solyc10g047170	Epidermis1	2.97779e-05	139
OG0009137	Os01g0916400	Atrichoblast	0.00285209	14	Solyc09g092430	Epidermis1	4.31547e-05	125
OG0003239	Os02g0102300	Atrichoblast	0.000641412	52	Solyc06g073583	Epidermis1	2.64741e-05	144
OG0000898	Os01g0770700	Atrichoblast	0.000320709	78	Solyc09g014870	Epidermis1	9.4138e-06	188
OG0002774	Os10g0566800	Atrichoblast	0.00016105	107	Solyc01g009410	Epidermis1	0.00708106	2
OG0002774	Os10g0566800	Atrichoblast	0.00016105	107	Solyc01g009400	Epidermis1	0.000198125	89
OG0009797	Os01g0972200	Atrichoblast	5.05794e-05	150	Solyc06g005620	Epidermis1	0.000900435	46
OG0000797	Os04g0223500	Atrichoblast	3.09395e-05	170	Solyc01g112100	Epidermis1	0.000261481	82
OG0002459	Os05g0382900	Atrichoblast	2.13525e-05	196	Solyc01g097540	Epidermis1	0.000434924	63
OG0000498	Os08g0127100	Atrichoblast	0.00429376	6	Solyc02g093860	Epidermis2	0.00682151	2
OG0001289	Os01g0284500	Atrichoblast	0.00378243	7	Solyc01g102400	Epidermis2	0.00159947	25
OG0000250	Os03g0830200	Atrichoblast	0.00185295	22	Solyc01g005470	Epidermis2	3.1657e-05	127
OG0005249	Os10g0370800	Atrichoblast	0.00152624	24	Solyc12g056960	Epidermis2	0.00116481	32
OG0000190	Os10g0444700	Atrichoblast	0.00130226	27	Solyc09g090070	Epidermis2	0.000195262	61
OG0000933	Os08g0398300	Atrichoblast	0.000812043	43	Solyc03g113040	Epidermis2	0.000450568	45
OG0004107	Os07g0106200	Atrichoblast	0.000781059	44	Solyc02g079220	Epidermis2	0.00262295	15
OG0007115	Os02g0690600	Atrichoblast	0.000683164	50	Solyc01g080920	Epidermis2	0.000219505	58
OG0000751	Os12g0432600	Atrichoblast	0.000206865	97	Solyc07g053420	Epidermis2	2.87642e-05	131
OG0001984	Os02g0620600	Atrichoblast	0.00012338	119	Solyc09g090730	Epidermis2	0.00074091	38
OG0002564	Os04g0311400	Atrichoblast	9.45847e-05	131	Solyc01g110110	Epidermis2	0.00057315	42
OG0000115	Os01g0950000	Atrichoblast	5.42339e-05	148	Solyc09g011520	Epidermis2	0.00253964	16
OG0000115	Os01g0950000	Atrichoblast	5.42339e-05	148	Solyc06g069040	Epidermis2	0.00017838	66
OG0007115	Os04g0589700	Atrichoblast	4.319e-05	158	Solyc01g080920	Epidermis2	0.000219505	58
OG0000179	Os05g0399300	Atrichoblast	3.68978e-05	161	Solyc10g055820	Epidermis2	4.59078e-05	109
