# Supplementary material for: Cross-species single-cell annotation with orthologous marker gene groups
Source: Research Square preprint supplement (doi:10.21203/rs.3.rs-3079082/v1), 2023-06-26
Supplement: Supplementary file 3 [file 150dbecdbb3861bfda5364a7.xlsx]

## Sheet: Xylem
Table S5: Conserved OMGs across three species using marker genes identified by the SVM method.
Orthogroup	ATH_MG	ATH_celltype	Novel	SVM_value	ATH_rank	Maize_MG	Maize_celltype	Novel	SVM_value	Maize_rank	Rice_MG	Rice_celltype	Novel	SVM_value	Rice_rank
OG0000146	AT4G36160	Xylem	Novel	0.0073415	7	Zm00001d002828	Xylem	Novel	0.0169867	17	Os04g0536500	Xylem	Novel	0.00400799	195
OG0000146	AT5G66300	Xylem	Novel	0.00466005	33	Zm00001d002828	Xylem	Novel	0.0169867	17	Os04g0536500	Xylem	Novel	0.00400799	195
OG0000146	AT1G12260	Xylem	Novel	0.00257096	101	Zm00001d002828	Xylem	Novel	0.0169867	17	Os04g0536500	Xylem	Novel	0.00400799	195
OG0000146	AT1G71930	Xylem	Novel	0.00148239	196	Zm00001d002828	Xylem	Novel	0.0169867	17	Os04g0536500	Xylem	Novel	0.00400799	195
OG0000316	AT2G21050	Xylem	Novel	0.0016765	173	Zm00001d028401	Xylem	Novel	0.00488046	114	Os05g0447200	Xylem	Novel	0.00782249	120
OG0001100	AT5G59845	Xylem	Novel	0.00175395	160	Zm00001d013222	Xylem	Novel	0.02439	10	Os03g0760800	Xylem	Novel	0.0121624	79
OG0001119	AT5G60020	Xylem	Novel	0.0017788	156	Zm00001d042906	Xylem	Novel	0.00147797	172	Os01g0842400	Xylem	Novel	0.0179054	43
OG0001289	AT3G62020	Xylem	Novel	0.00204223	132	Zm00001d018954	Xylem	Novel	0.00300895	143	Os05g0277500	Xylem	Novel	0.0208676	32
OG0001289	AT3G62020	Xylem	Novel	0.00204223	132	Zm00001d018954	Xylem	Novel	0.00300895	143	Os01g0249200	Xylem	Novel	0.00472716	172
OG0001289	AT1G02335	Xylem	Novel	0.00167731	172	Zm00001d018954	Xylem	Novel	0.00300895	143	Os05g0277500	Xylem	Novel	0.0208676	32
OG0001289	AT1G02335	Xylem	Novel	0.00167731	172	Zm00001d018954	Xylem	Novel	0.00300895	143	Os01g0249200	Xylem	Novel	0.00472716	172
OG0001727	AT4G35350	Xylem	Novel	0.00643542	12	Zm00001d035689	Xylem	Novel	0.0794168	1	Os05g0108600	Xylem	Novel	0.0731805	1
OG0001727	AT4G35350	Xylem	Novel	0.00643542	12	Zm00001d035689	Xylem	Novel	0.0794168	1	Os02g0715000	Xylem	Novel	0.00453868	177
OG0001727	AT4G35350	Xylem	Novel	0.00643542	12	Zm00001d035689	Xylem	Novel	0.0794168	1	Os01g0971400	Xylem	Novel	0.0480806	6
OG0001727	AT4G35350	Xylem	Novel	0.00643542	12	Zm00001d011787	Xylem	Novel	0.0107926	52	Os05g0108600	Xylem	Novel	0.0731805	1
OG0001727	AT4G35350	Xylem	Novel	0.00643542	12	Zm00001d011787	Xylem	Novel	0.0107926	52	Os02g0715000	Xylem	Novel	0.00453868	177
OG0001727	AT4G35350	Xylem	Novel	0.00643542	12	Zm00001d011787	Xylem	Novel	0.0107926	52	Os01g0971400	Xylem	Novel	0.0480806	6
OG0001727	AT1G20850	Xylem	Novel	0.00426439	41	Zm00001d035689	Xylem	Novel	0.0794168	1	Os05g0108600	Xylem	Novel	0.0731805	1
OG0001727	AT1G20850	Xylem	Novel	0.00426439	41	Zm00001d035689	Xylem	Novel	0.0794168	1	Os02g0715000	Xylem	Novel	0.00453868	177
OG0001727	AT1G20850	Xylem	Novel	0.00426439	41	Zm00001d035689	Xylem	Novel	0.0794168	1	Os01g0971400	Xylem	Novel	0.0480806	6
OG0001727	AT1G20850	Xylem	Novel	0.00426439	41	Zm00001d011787	Xylem	Novel	0.0107926	52	Os05g0108600	Xylem	Novel	0.0731805	1
OG0001727	AT1G20850	Xylem	Novel	0.00426439	41	Zm00001d011787	Xylem	Novel	0.0107926	52	Os02g0715000	Xylem	Novel	0.00453868	177
OG0001727	AT1G20850	Xylem	Novel	0.00426439	41	Zm00001d011787	Xylem	Novel	0.0107926	52	Os01g0971400	Xylem	Novel	0.0480806	6
OG0003708	AT5G03170	Xylem	Novel	0.00496935	28	Zm00001d039770	Xylem	Novel	0.015499	23	Os05g0163300	Xylem	Novel	0.0334506	14
OG0003708	AT5G60490	Xylem	Novel	0.00424897	42	Zm00001d039770	Xylem	Novel	0.015499	23	Os05g0163300	Xylem	Novel	0.0334506	14
OG0004808	AT3G52820	Xylem	Novel	0.00146915	198	Zm00001d025343	Xylem	Novel	0.00101226	189	Os04g0410600	Xylem	Novel	0.0181392	41
OG0005437	AT1G68810	Xylem	Novel	0.00967138	3	Zm00001d047878	Xylem	Novel	0.00622408	98	Os03g0260600	Xylem	Novel	0.014646	62
OG0005437	AT3G25710	Xylem	Novel	0.00548983	22	Zm00001d047878	Xylem	Novel	0.00622408	98	Os03g0260600	Xylem	Novel	0.014646	62
OG0009397	AT5G17420	Xylem	Novel	0.00273174	97	Zm00001d020531	Xylem	Novel	0.00169714	168	Os09g0422500	Xylem	Novel	0.0173329	47
OG0009397	AT5G17420	Xylem	Novel	0.00273174	97	Zm00001d005775	Xylem	Novel	0.00485628	115	Os09g0422500	Xylem	Novel	0.0173329	47
OG0009507	AT5G02640	Xylem	Novel	0.00659408	10	Zm00001d035556	Xylem	Novel	0.00382525	132	Os05g0120300	Xylem	Novel	0.0456581	7
OG0010741	AT1G79620	Xylem	Novel	0.00247654	105	Zm00001d029012	Xylem	Novel	0.0114698	49	Os03g0329700	Xylem	Novel	0.0259603	22
OG0011478	AT2G04850	Xylem	Novel	0.0033432	66	Zm00001d028170	Xylem	Novel	0.0148886	25	Os03g0194300	Xylem	Novel	0.0417887	10
OG0012971	AT5G44030	Xylem	Novel	0.00205509	131	Zm00001d032776	Xylem	Novel	0.00802465	80	Os10g0467800	Xylem	Novel	0.0190627	39
OG0013176	AT5G40020	Xylem	Novel	0.00202408	134	Zm00001d032972	Xylem	Novel	0.0464943	2	Os10g0412700	Xylem	Novel	0.0436908	8

## Sheet: Cortex
Orthogroup	ATH_MG	ATH_celltype	Novel	SVM_value	ATH_rank	Maize_MG	Maize_celltype	Novel	SVM_value	Maize_rank	Rice_MG	Rice_celltype	Novel	SVM_value	Rice_rank
OG0000499	AT1G12090	Cortex	Novel	0.00790526	3	Zm00001d026163	Cortex_like	Novel	0.0249667	2	Os02g0662000	Cortex_like	Novel	0.0519129	1
OG0000499	AT1G12090	Cortex	Novel	0.00790526	3	Zm00001d026163	Cortex_like	Novel	0.0249667	2	Os04g0554600	Cortex_like	Novel	0.0179115	31
OG0000499	AT1G12090	Cortex	Novel	0.00790526	3	Zm00001d026162	Cortex_like	Novel	0.00825269	51	Os02g0662000	Cortex_like	Novel	0.0519129	1
OG0000499	AT1G12090	Cortex	Novel	0.00790526	3	Zm00001d026162	Cortex_like	Novel	0.00825269	51	Os04g0554600	Cortex_like	Novel	0.0179115	31
OG0000499	AT1G12090	Cortex	Novel	0.00790526	3	Zm00001d051384	Cortex_like	Novel	0.00572679	88	Os02g0662000	Cortex_like	Novel	0.0519129	1
OG0000499	AT1G12090	Cortex	Novel	0.00790526	3	Zm00001d051384	Cortex_like	Novel	0.00572679	88	Os04g0554600	Cortex_like	Novel	0.0179115	31
OG0000499	AT4G12520	Cortex	Novel	0.00292038	69	Zm00001d026163	Cortex_like	Novel	0.0249667	2	Os02g0662000	Cortex_like	Novel	0.0519129	1
OG0000499	AT4G12520	Cortex	Novel	0.00292038	69	Zm00001d026163	Cortex_like	Novel	0.0249667	2	Os04g0554600	Cortex_like	Novel	0.0179115	31
OG0000499	AT4G12520	Cortex	Novel	0.00292038	69	Zm00001d026162	Cortex_like	Novel	0.00825269	51	Os02g0662000	Cortex_like	Novel	0.0519129	1
OG0000499	AT4G12520	Cortex	Novel	0.00292038	69	Zm00001d026162	Cortex_like	Novel	0.00825269	51	Os04g0554600	Cortex_like	Novel	0.0179115	31
OG0000499	AT4G12520	Cortex	Novel	0.00292038	69	Zm00001d051384	Cortex_like	Novel	0.00572679	88	Os02g0662000	Cortex_like	Novel	0.0519129	1
OG0000499	AT4G12520	Cortex	Novel	0.00292038	69	Zm00001d051384	Cortex_like	Novel	0.00572679	88	Os04g0554600	Cortex_like	Novel	0.0179115	31
OG0000499	AT1G62510	Cortex	Novel	0.00291893	70	Zm00001d026163	Cortex_like	Novel	0.0249667	2	Os02g0662000	Cortex_like	Novel	0.0519129	1
OG0000499	AT1G62510	Cortex	Novel	0.00291893	70	Zm00001d026163	Cortex_like	Novel	0.0249667	2	Os04g0554600	Cortex_like	Novel	0.0179115	31
OG0000499	AT1G62510	Cortex	Novel	0.00291893	70	Zm00001d026162	Cortex_like	Novel	0.00825269	51	Os02g0662000	Cortex_like	Novel	0.0519129	1
OG0000499	AT1G62510	Cortex	Novel	0.00291893	70	Zm00001d026162	Cortex_like	Novel	0.00825269	51	Os04g0554600	Cortex_like	Novel	0.0179115	31
OG0000499	AT1G62510	Cortex	Novel	0.00291893	70	Zm00001d051384	Cortex_like	Novel	0.00572679	88	Os02g0662000	Cortex_like	Novel	0.0519129	1
OG0000499	AT1G62510	Cortex	Novel	0.00291893	70	Zm00001d051384	Cortex_like	Novel	0.00572679	88	Os04g0554600	Cortex_like	Novel	0.0179115	31
OG0008136	AT2G06925	Cortex	Novel	0.00285689	77	Zm00001d033683	Cortex_like	Novel	0.0180556	10	Os03g0708000	Cortex_like	Novel	0.0149933	53
OG0008136	AT2G06925	Cortex	Novel	0.00285689	77	Zm00001d013461	Cortex_like	Novel	0.00539225	95	Os03g0708000	Cortex_like	Novel	0.0149933	53

## Sheet: Nonhair
Orthogroup	ATH_MG	ATH_celltype	Novel	SVM_value	ATH_rank	Maize_MG	Maize_celltype	Novel	SVM_value	Maize_rank	Rice_MG	Rice_celltype	Novel	SVM_value	Rice_rank
OG0000378	AT3G29035	Atrichoblast1	Novel	0.00447004	37	Zm00001d022517	Epidermis	Novel	0.010165	31	Os03g0327100	Atrichoblast	Novel	0.0072829	134
OG0000378	AT5G39610	Atrichoblast1	Novel	0.00351288	86	Zm00001d022517	Epidermis	Novel	0.010165	31	Os03g0327100	Atrichoblast	Novel	0.0072829	134
OG0002396	AT1G20190	Atrichoblast1	Novel	0.00454884	34	Zm00001d027717	Epidermis	Novel	0.00448112	83	Os03g0155300	Atrichoblast	Novel	0.0103955	95
OG0002396	AT1G20190	Atrichoblast1	Novel	0.00454884	34	Zm00001d027718	Epidermis	Novel	0.00441928	85	Os03g0155300	Atrichoblast	Novel	0.0103955	95

## Sheet: Hair
Orthogroup	ATH_MG	ATH_celltype	Novel	SVM_value	ATH_rank	Maize_MG	Maize_celltype	Novel	SVM_value	Maize_rank	Rice_MG	Rice_celltype	Novel	SVM_value	Rice_rank
OG0002774	AT5G22410	Trichoblast1	Novel	0.00451202	39	Zm00001d047066	Epidermis	Novel	0.00330258	108	Os09g0323700	Trichoblast1	Novel	0.000501855	65
OG0005038	AT5G50200	Trichoblast1	Novel	0.00290725	66	Zm00001d017095	Epidermis	Novel	0.014629	11	Os02g0595900	Trichoblast1	Novel	0.0237363	3

## Sheet: Phloem
Orthogroup	ATH_MG	ATH_celltype	Novel	SVM_value	ATH_rank	Maize_MG	Maize_celltype	Novel	SVM_value	Maize_rank	Rice_MG	Rice_celltype	Novel	SVM_value	Rice_rank
OG0000268	AT5G23370	Phloem	Novel	0.00203768	121	Zm00001d025901	Phloem	Novel	0.0175239	39	Os10g0489000	Phloem	Novel	0.00279279	177

## Sheet: Stele
Orthogroup	ATH_MG	ATH_celltype	Novel	SVM_value	ATH_rank	Maize_MG	Maize_celltype	Novel	SVM_value	Maize_rank	Rice_MG	Rice_celltype	Novel	SVM_value	Rice_rank
OG0001173	AT5G02960	Stele1	Novel	0.0021066	52	Zm00001d010566	Stele1	Novel	0.0103316	31	Os01g0834500	Stele	Novel	0.0143614	53
OG0002485	AT5G58420	Stele1	Novel	0.00235709	37	Zm00001d012878	Stele1	Novel	0.0107436	26	Os02g0105900	Stele	Novel	0.0121608	82
OG0002643	AT3G49010	Stele1	Novel	0.00265227	24	Zm00001d011992	Stele1	Novel	0.0063916	66	Os03g0576700	Stele	Novel	0.0147521	50
