# Supplementary material for: Cross-species single-cell annotation with orthologous marker gene groups
Source: Research Square preprint supplement (doi:10.21203/rs.3.rs-3079082/v1), 2023-06-26
Supplement: Supplementary file 4 [file 3269e180179df3fcb98aa527.xlsx]

## Sheet: Xylem
Table S4: Conserved OMGs across three species using marker genes identified by the SHAP method.
Orthogroup	ATH_MG	ATH_celltype	Novel	SHAP_value	ATH_rank	Maize_MG	Maize_celltype	Novel	SHAP_value	Maize_rank	Rice_MG	Rice_celltype	Novel	SHAP_value	Rice_rank
OG0000146	AT4G36160	Xylem	Novel	0.00253096	3	Zm00001d002828	Xylem	Novel	0.000993155	5	Os04g0536500	Xylem	Novel	1.56389e-05	159
OG0000146	AT5G66300	Xylem	Novel	0.00144826	8	Zm00001d002828	Xylem	Novel	0.000993155	5	Os04g0536500	Xylem	Novel	1.56389e-05	159
OG0000146	AT1G12260	Xylem	Novel	0.000951835	14	Zm00001d002828	Xylem	Novel	0.000993155	5	Os04g0536500	Xylem	Novel	1.56389e-05	159
OG0000146	AT1G71930	Xylem	Novel	0.000392795	38	Zm00001d002828	Xylem	Novel	0.000993155	5	Os04g0536500	Xylem	Novel	1.56389e-05	159
OG0000316	AT2G21050	Xylem	Novel	2.86045e-05	177	Zm00001d028401	Xylem	Novel	4.85884e-05	77	Os05g0447200	Xylem	Novel	9.78948e-05	83
OG0000316	AT2G21050	Xylem	Novel	2.86045e-05	177	Zm00001d028401	Xylem	Novel	4.85884e-05	77	Os03g0244600	Xylem	Novel	7.13578e-06	197
OG0001148	AT2G27740	Xylem	Novel	0.00014197	93	Zm00001d016683	Xylem	Novel	0.000253281	29	Os02g0528100	Xylem	Novel	0.00309734	3
OG0001148	AT2G27740	Xylem	Novel	0.00014197	93	Zm00001d016683	Xylem	Novel	0.000253281	29	Os04g0408600	Xylem	Novel	0.000147014	68
OG0001148	AT2G27740	Xylem	Novel	0.00014197	93	Zm00001d025338	Xylem	Novel	5.04135e-05	75	Os02g0528100	Xylem	Novel	0.00309734	3
OG0001148	AT2G27740	Xylem	Novel	0.00014197	93	Zm00001d025338	Xylem	Novel	5.04135e-05	75	Os04g0408600	Xylem	Novel	0.000147014	68
OG0001227	AT5G26330	Xylem	Novel	9.18323e-05	113	Zm00001d013038	Xylem	Novel	6.52448e-06	139	Os03g0807500	Xylem	Novel	0.00199577	8
OG0001289	AT3G62020	Xylem	Novel	0.000322975	45	Zm00001d018954	Xylem	Novel	7.852e-06	134	Os05g0277500	Xylem	Novel	0.000830963	16
OG0001289	AT3G62020	Xylem	Novel	0.000322975	45	Zm00001d018954	Xylem	Novel	7.852e-06	134	Os01g0249200	Xylem	Novel	2.73835e-05	132
OG0001727	AT4G35350	Xylem	Novel	0.000518613	28	Zm00001d035689	Xylem	Novel	0.00328478	1	Os01g0971400	Xylem	Novel	0.001937	9
OG0001727	AT4G35350	Xylem	Novel	0.000518613	28	Zm00001d035689	Xylem	Novel	0.00328478	1	Os05g0108600	Xylem	Novel	0.00599146	1
OG0001727	AT4G35350	Xylem	Novel	0.000518613	28	Zm00001d035689	Xylem	Novel	0.00328478	1	Os02g0715000	Xylem	Novel	0.000121008	73
OG0001727	AT4G35350	Xylem	Novel	0.000518613	28	Zm00001d011787	Xylem	Novel	0.000503506	9	Os01g0971400	Xylem	Novel	0.001937	9
OG0001727	AT4G35350	Xylem	Novel	0.000518613	28	Zm00001d011787	Xylem	Novel	0.000503506	9	Os05g0108600	Xylem	Novel	0.00599146	1
OG0001727	AT4G35350	Xylem	Novel	0.000518613	28	Zm00001d011787	Xylem	Novel	0.000503506	9	Os02g0715000	Xylem	Novel	0.000121008	73
OG0001727	AT1G20850	Xylem	Novel	0.000229393	68	Zm00001d035689	Xylem	Novel	0.00328478	1	Os01g0971400	Xylem	Novel	0.001937	9
OG0001727	AT1G20850	Xylem	Novel	0.000229393	68	Zm00001d035689	Xylem	Novel	0.00328478	1	Os05g0108600	Xylem	Novel	0.00599146	1
OG0001727	AT1G20850	Xylem	Novel	0.000229393	68	Zm00001d035689	Xylem	Novel	0.00328478	1	Os02g0715000	Xylem	Novel	0.000121008	73
OG0001727	AT1G20850	Xylem	Novel	0.000229393	68	Zm00001d011787	Xylem	Novel	0.000503506	9	Os01g0971400	Xylem	Novel	0.001937	9
OG0001727	AT1G20850	Xylem	Novel	0.000229393	68	Zm00001d011787	Xylem	Novel	0.000503506	9	Os05g0108600	Xylem	Novel	0.00599146	1
OG0001727	AT1G20850	Xylem	Novel	0.000229393	68	Zm00001d011787	Xylem	Novel	0.000503506	9	Os02g0715000	Xylem	Novel	0.000121008	73
OG0002019	AT4G18425	Xylem	Novel	3.20237e-05	167	Zm00001d009557	Xylem	Novel	9.23084e-06	129	Os05g0562800	Xylem	Novel	1.87277e-05	151
OG0002814	AT5G15630	Xylem	Novel	4.29046e-05	148	Zm00001d022082	Xylem	Novel	8.91191e-05	55	Os07g0604400	Xylem	Novel	0.000308104	43
OG0003708	AT5G03170	Xylem	Novel	0.00175679	6	Zm00001d039770	Xylem	Novel	0.0002661	25	Os05g0163300	Xylem	Novel	0.000906531	14
OG0003708	AT5G60490	Xylem	Novel	0.000864184	16	Zm00001d039770	Xylem	Novel	0.0002661	25	Os05g0163300	Xylem	Novel	0.000906531	14
OG0004869	AT4G26580	Xylem	Novel	2.41828e-05	187	Zm00001d043728	Xylem	Novel	2.83808e-06	165	Os01g0703300	Xylem	Novel	9.23364e-05	85
OG0005437	AT1G68810	Xylem	Novel	0.00313967	1	Zm00001d047878	Xylem	Novel	6.13452e-05	70	Os03g0260600	Xylem	Novel	0.00040309	36
OG0005437	AT3G25710	Xylem	Novel	0.000392962	37	Zm00001d047878	Xylem	Novel	6.13452e-05	70	Os03g0260600	Xylem	Novel	0.00040309	36
OG0008841	AT3G21550	Xylem	Novel	2.38864e-05	189	Zm00001d047420	Xylem	Novel	3.37082e-06	159	Os03g0370400	Xylem	Novel	3.08605e-05	127
OG0009397	AT5G17420	Xylem	Novel	0.000250461	62	Zm00001d005775	Xylem	Novel	7.59082e-05	65	Os09g0422500	Xylem	Novel	0.000367071	39
OG0009397	AT5G17420	Xylem	Novel	0.000250461	62	Zm00001d020531	Xylem	Novel	1.44419e-05	117	Os09g0422500	Xylem	Novel	0.000367071	39
OG0009507	AT5G02640	Xylem	Novel	0.00107024	11	Zm00001d035556	Xylem	Novel	2.73238e-05	91	Os05g0120300	Xylem	Novel	0.0021812	5
OG0010741	AT1G79620	Xylem	Novel	0.000568862	23	Zm00001d029012	Xylem	Novel	0.000284518	20	Os03g0329700	Xylem	Novel	0.000701798	20
OG0011478	AT2G04850	Xylem	Novel	0.00121138	10	Zm00001d028170	Xylem	Novel	0.000335426	17	Os03g0194300	Xylem	Novel	0.00212669	6
OG0012971	AT5G44030	Xylem	Novel	0.000176959	83	Zm00001d032776	Xylem	Novel	0.000381792	14	Os10g0467800	Xylem	Novel	0.000492547	32
OG0013079	AT5G60720	Xylem	Novel	0.000165894	84	Zm00001d012808	Xylem	Novel	6.80827e-07	189	Os03g0859900	Xylem	Novel	0.000279498	44
OG0013176	AT5G40020	Xylem	Novel	3.13039e-05	170	Zm00001d032972	Xylem	Novel	0.00234751	2	Os10g0412700	Xylem	Novel	0.00187116	10

## Sheet: Cortex
Orthogroup	ATH_MG	ATH_celltype	Novel	SHAP_value	ATH_rank	Maize_MG	Maize_celltype	Novel	SHAP_value	Maize_rank	Rice_MG	Rice_celltype	Novel	SHAP_value	Rice_rank
OG0000499	AT1G12090	Cortex	Novel	0.0026097	4	Zm00001d051384	Cortex_like	Novel	7.50459e-05	146	Os04g0554500	Cortex	Novel	0.00715498	5
OG0000499	AT1G12090	Cortex	Novel	0.0026097	4	Zm00001d051384	Cortex_like	Novel	7.50459e-05	146	Os04g0554600	Cortex	Novel	0.00265566	13
OG0000499	AT1G62510	Cortex	Novel	0.00107769	19	Zm00001d051384	Cortex_like	Novel	7.50459e-05	146	Os04g0554500	Cortex	Novel	0.00715498	5
OG0000499	AT1G62510	Cortex	Novel	0.00107769	19	Zm00001d051384	Cortex_like	Novel	7.50459e-05	146	Os04g0554600	Cortex	Novel	0.00265566	13
OG0000499	AT4G12510	Cortex	Novel	0.000106162	93	Zm00001d051384	Cortex_like	Novel	7.50459e-05	146	Os04g0554500	Cortex	Novel	0.00715498	5
OG0000499	AT4G12510	Cortex	Novel	0.000106162	93	Zm00001d051384	Cortex_like	Novel	7.50459e-05	146	Os04g0554600	Cortex	Novel	0.00265566	13
OG0000499	AT4G12520	Cortex	Novel	3.83916e-05	150	Zm00001d051384	Cortex_like	Novel	7.50459e-05	146	Os04g0554500	Cortex	Novel	0.00715498	5
OG0000499	AT4G12520	Cortex	Novel	3.83916e-05	150	Zm00001d051384	Cortex_like	Novel	7.50459e-05	146	Os04g0554600	Cortex	Novel	0.00265566	13
OG0004220	AT1G72210	Cortex	Novel	4.81163e-05	137	Zm00001d048229	Cortex_like	Novel	5.87133e-05	163	Os03g0188400	Cortex	Novel	2.37289e-05	122
OG0008136	AT2G06925	Cortex	Novel	0.000850649	27	Zm00001d033683	Cortex_like	Novel	0.00212217	11	Os03g0708000	Cortex	Novel	0.00423698	12
OG0008136	AT2G06925	Cortex	Novel	0.000850649	27	Zm00001d013461	Cortex_like	Novel	0.000213142	87	Os03g0708000	Cortex	Novel	0.00423698	12

## Sheet: Nonhair
Orthogroup	ATH_MG	ATH_celltype	Novel	SHAP_value	ATH_rank	Maize_MG	Maize_celltype	Novel	SHAP_value	Maize_rank	Rice_MG	Rice_celltype	Novel	SHAP_value	Rice_rank
OG0000418	AT1G28290	Atrichoblast2	Novel	0.0019407	1	Zm00001d043590	Epidermis	Novel	0.000864575	28	Os01g0726100	Atrichoblast	Novel	9.93107e-05	129
OG0000418	AT2G33790	Atrichoblast2	Novel	0.000631172	18	Zm00001d043590	Epidermis	Novel	0.000864575	28	Os01g0726100	Atrichoblast	Novel	9.93107e-05	129
OG0011122	AT1G68150	Atrichoblast2	Novel	0.000122573	108	Zm00001d018203	Epidermis	Novel	2.03106e-05	114	Os02g0770500	Atrichoblast	Novel	5.80299e-05	145

## Sheet: Hair
Orthogroup	ATH_MG	ATH_celltype	Novel	SHAP_value	ATH_rank	Maize_MG	Maize_celltype	Novel	SHAP_value	Maize_rank	Rice_MG	Rice_celltype	Novel	SHAP_value	Rice_rank
OG0000331	AT2G43820	Trichoblast2	Novel	0.00184555	31	Zm00001d021167	Epidermis	Novel	1.1138e-05	125	Os09g0517900	Trichoblast2	Novel	1.33428e-05	132

## Sheet: Phloem
Orthogroup	ATH_MG	ATH_celltype	Novel	SHAP_value	ATH_rank	Maize_MG	Maize_celltype	Novel	SHAP_value	Maize_rank	Rice_MG	Rice_celltype	Novel	SHAP_value	Rice_rank
OG0006651	AT4G33660	Phloem	Novel	0.000471475	13	Zm00001d034497	Phloem	Novel	0.00144762	21	Os07g0191650	Phloem	Novel	0.00456095	5

## Sheet: Stele
Orthogroup	ATH_MG	ATH_celltype	Novel	SHAP_value	ATH_rank	Maize_MG	Maize_celltype	Novel	SHAP_value	Maize_rank	Rice_MG	Rice_celltype	Novel	SHAP_value	Rice_rank
OG0000736	AT2G03090	Stele1	Novel	0.000125995	199	Zm00001d038476	Stele2	Novel	0.000938668	29	Os05g0477600	Stele	Novel	0.000487217	40
OG0000736	AT2G03090	Stele1	Novel	0.000125995	199	Zm00001d038476	Stele2	Novel	0.000938668	29	Os01g0823100	Stele	Novel	0.000400997	44

## Sheet: Endo_Stele
Orthogroup	ATH_MG	ATH_celltype	Novel	SHAP_value	ATH_rank	Maize_MG	Maize_celltype	Novel	SHAP_value	Maize_rank	Rice_MG	Rice_celltype	Novel	SHAP_value	Rice_rank
OG0000746	AT4G18730	Stele1	Novel	0.00117118	47	Zm00001d010016	Endodermal_Initials	Novel	0.000162418	83	Os01g0205500	Endodermis	Novel	4.89866e-05	146
OG0000821	AT1G17880	Stele1	Novel	0.000314263	140	Zm00001d034855	Endodermal_Initials	Novel	0.000157525	86	Os03g0851000	Endodermis	Novel	0.000144134	99
OG0000832	AT1G04480	Stele1	Novel	0.000257554	149	Zm00001d051929	Endodermal_Initials	Novel	0.00040541	49	Os10g0466700	Endodermis	Novel	0.00104068	22
OG0000832	AT1G04480	Stele1	Novel	0.000257554	149	Zm00001d048368	Endodermal_Initials	Novel	0.00299159	6	Os10g0466700	Endodermis	Novel	0.00104068	22
OG0000832	AT3G04400	Stele1	Novel	0.00135247	40	Zm00001d051929	Endodermal_Initials	Novel	0.00040541	49	Os10g0466700	Endodermis	Novel	0.00104068	22
OG0000832	AT3G04400	Stele1	Novel	0.00135247	40	Zm00001d048368	Endodermal_Initials	Novel	0.00299159	6	Os10g0466700	Endodermis	Novel	0.00104068	22
OG0000832	AT2G33370	Stele1	Novel	0.000332677	135	Zm00001d051929	Endodermal_Initials	Novel	0.00040541	49	Os10g0466700	Endodermis	Novel	0.00104068	22
OG0000832	AT2G33370	Stele1	Novel	0.000332677	135	Zm00001d048368	Endodermal_Initials	Novel	0.00299159	6	Os10g0466700	Endodermis	Novel	0.00104068	22
OG0000924	AT2G01250	Stele1	Novel	0.000546125	98	Zm00001d026254	Endodermal_Initials	Novel	0.000593733	39	Os08g0234000	Endodermis	Novel	0.000321021	59
OG0001185	AT3G23390	Stele1	Novel	0.000316159	138	Zm00001d021652	Endodermal_Initials	Novel	0.000475547	46	Os07g0523700	Endodermis	Novel	0.00107036	20
OG0001208	AT5G41520	Stele1	Novel	0.000843802	65	Zm00001d003672	Endodermal_Initials	Novel	0.000257899	64	Os01g0962600	Endodermis	Novel	0.000148236	98
OG0001301	AT2G32060	Stele1	Novel	0.000231632	152	Zm00001d039106	Endodermal_Initials	Novel	0.000552363	42	Os07g0229900	Endodermis	Novel	0.000609218	39
OG0001328	AT1G69620	Stele1	Novel	0.0014294	37	Zm00001d032181	Endodermal_Initials	Novel	0.000389453	53	Os08g0156800	Endodermis	Novel	0.000247193	68
OG0001374	AT1G18540	Stele1	Novel	0.000546596	97	Zm00001d017047	Endodermal_Initials	Novel	0.000278247	62	Os04g0473400	Endodermis	Novel	0.000170037	86
OG0001374	AT1G18540	Stele1	Novel	0.000546596	97	Zm00001d050921	Endodermal_Initials	Novel	7.4246e-05	132	Os04g0473400	Endodermis	Novel	0.000170037	86
OG0001378	AT1G72370	Stele1	Novel	0.000607107	92	Zm00001d027527	Endodermal_Initials	Novel	5.34904e-05	152	Os03g0182600	Endodermis	Novel	0.000105948	111
OG0001378	AT1G72370	Stele1	Novel	0.000607107	92	Zm00001d027527	Endodermal_Initials	Novel	5.34904e-05	152	Os07g0616600	Endodermis	Novel	5.59438e-05	140
OG0001378	AT1G72370	Stele1	Novel	0.000607107	92	Zm00001d048253	Endodermal_Initials	Novel	5.48918e-05	151	Os03g0182600	Endodermis	Novel	0.000105948	111
OG0001378	AT1G72370	Stele1	Novel	0.000607107	92	Zm00001d048253	Endodermal_Initials	Novel	5.48918e-05	151	Os07g0616600	Endodermis	Novel	5.59438e-05	140
OG0001454	AT2G47610	Stele1	Novel	0.0024175	13	Zm00001d031640	Endodermal_Initials	Novel	0.00078049	30	Os08g0326400	Endodermis	Novel	0.000665184	37
OG0001454	AT2G47610	Stele1	Novel	0.0024175	13	Zm00001d031640	Endodermal_Initials	Novel	0.00078049	30	Os09g0507800	Endodermis	Novel	0.000246772	69
OG0001454	AT3G62870	Stele1	Novel	0.000574461	93	Zm00001d031640	Endodermal_Initials	Novel	0.00078049	30	Os08g0326400	Endodermis	Novel	0.000665184	37
OG0001454	AT3G62870	Stele1	Novel	0.000574461	93	Zm00001d031640	Endodermal_Initials	Novel	0.00078049	30	Os09g0507800	Endodermis	Novel	0.000246772	69
OG0001792	AT5G59850	Stele1	Novel	0.000142029	191	Zm00001d009000	Endodermal_Initials	Novel	0.00147979	13	Os07g0208000	Endodermis	Novel	0.00116086	18
OG0001792	AT5G59850	Stele1	Novel	0.000142029	191	Zm00001d009000	Endodermal_Initials	Novel	0.00147979	13	Os02g0478600	Endodermis	Novel	0.000386429	51
OG0001792	AT1G07770	Stele1	Novel	0.00118259	46	Zm00001d009000	Endodermal_Initials	Novel	0.00147979	13	Os07g0208000	Endodermis	Novel	0.00116086	18
OG0001792	AT1G07770	Stele1	Novel	0.00118259	46	Zm00001d009000	Endodermal_Initials	Novel	0.00147979	13	Os02g0478600	Endodermis	Novel	0.000386429	51
OG0001806	AT1G52300	Stele1	Novel	0.00200845	23	Zm00001d054065	Endodermal_Initials	Novel	0.00109223	16	Os02g0111700	Endodermis	Novel	0.000321932	58
OG0001806	AT1G52300	Stele1	Novel	0.00200845	23	Zm00001d014969	Endodermal_Initials	Novel	0.000787218	29	Os02g0111700	Endodermis	Novel	0.000321932	58
OG0002565	AT2G36160	Stele1	Novel	0.00124804	44	Zm00001d000120	Endodermal_Initials	Novel	6.66224e-05	139	Os02g0534800	Endodermis	Novel	0.000210389	75
OG0002565	AT2G36160	Stele1	Novel	0.00124804	44	Zm00001d036568	Endodermal_Initials	Novel	0.00129119	14	Os02g0534800	Endodermis	Novel	0.000210389	75
OG0002565	AT3G11510	Stele1	Novel	0.00068256	84	Zm00001d000120	Endodermal_Initials	Novel	6.66224e-05	139	Os02g0534800	Endodermis	Novel	0.000210389	75
OG0002565	AT3G11510	Stele1	Novel	0.00068256	84	Zm00001d036568	Endodermal_Initials	Novel	0.00129119	14	Os02g0534800	Endodermis	Novel	0.000210389	75
OG0002614	AT5G27850	Stele1	Novel	0.000886955	60	Zm00001d009848	Endodermal_Initials	Novel	0.00153868	12	Os03g0341100	Endodermis	Novel	9.46308e-05	118
OG0002614	AT3G05590	Stele1	Novel	0.000693677	82	Zm00001d009848	Endodermal_Initials	Novel	0.00153868	12	Os03g0341100	Endodermis	Novel	9.46308e-05	118
OG0002811	AT5G15200	Stele1	Novel	0.00115945	48	Zm00001d047186	Endodermal_Initials	Novel	0.00040703	48	Os03g0154700	Endodermis	Novel	0.000343069	54
OG0002811	AT5G15200	Stele1	Novel	0.00115945	48	Zm00001d047186	Endodermal_Initials	Novel	0.00040703	48	Os11g0602600	Endodermis	Novel	0.000189753	80
OG0003476	AT3G60245	Stele1	Novel	0.000498214	104	Zm00001d009509	Endodermal_Initials	Novel	7.41625e-05	133	Os05g0557000	Endodermis	Novel	0.000254791	67
OG0003604	AT4G18100	Stele1	Novel	0.00134265	41	Zm00001d006064	Endodermal_Initials	Novel	0.000243998	67	Os09g0502000	Endodermis	Novel	7.77824e-05	126
OG0003604	AT4G18100	Stele1	Novel	0.00134265	41	Zm00001d021020	Endodermal_Initials	Novel	9.29203e-05	115	Os09g0502000	Endodermis	Novel	7.77824e-05	126
OG0004105	AT1G67430	Stele1	Novel	0.00108681	51	Zm00001d037732	Endodermal_Initials	Novel	0.000114851	107	Os09g0258600	Endodermis	Novel	0.000865325	25

## Sheet: Endo_Nonhair
Orthogroup	ATH_MG	ATH_celltype	Novel	SHAP_value	ATH_rank	Maize_MG	Maize_celltype	Novel	SHAP_value	Maize_rank	Rice_MG	Rice_celltype	Novel	SHAP_value	Rice_rank
OG0000746	AT5G45775	Atrichoblast2	Novel	0.00011195	115	Zm00001d010016	Endodermal_Initials	Novel	0.000162418	83	Os01g0205500	Endodermis	Novel	4.89866e-05	146
OG0000746	AT3G58700	Atrichoblast2	Novel	5.64151e-05	163	Zm00001d010016	Endodermal_Initials	Novel	0.000162418	83	Os01g0205500	Endodermis	Novel	4.89866e-05	146
OG0001301	AT1G15930	Atrichoblast2	Novel	0.000347624	39	Zm00001d039106	Endodermal_Initials	Novel	0.000552363	42	Os07g0229900	Endodermis	Novel	0.000609218	39
OG0001374	AT1G74060	Atrichoblast2	Novel	0.000127788	103	Zm00001d017047	Endodermal_Initials	Novel	0.000278247	62	Os04g0473400	Endodermis	Novel	0.000170037	86
OG0001374	AT1G74060	Atrichoblast2	Novel	0.000127788	103	Zm00001d050921	Endodermal_Initials	Novel	7.4246e-05	132	Os04g0473400	Endodermis	Novel	0.000170037	86
OG0004105	AT1G27400	Atrichoblast2	Novel	0.000303526	45	Zm00001d037732	Endodermal_Initials	Novel	0.000114851	107	Os09g0258600	Endodermis	Novel	0.000865325	25
