# Supplementary material for: Cross-species single-cell annotation with orthologous marker gene groups
Source: Research Square preprint supplement (doi:10.21203/rs.3.rs-3079082/v1), 2023-06-26
Supplement: Supplementary file 5 [file 743e604b97dc9ad9acc772fe.xlsx]

## Sheet: ATH_Seurat
Marker_Genes	Orthogroup	Clusters	Values
AT2G02130	OG0001030	Stele1	3.59556
AT1G44800	OG0002249	Stele1	2.37248
AT3G14990	OG0005506	Stele1	2.30196
AT4G14010	OG0018521	Stele1	2.30129
AT3G16330	OG0001768	Stele1	2.2747
AT3G21770	OG0000492	Stele1	2.27296
AT4G18510	OG0017720	Stele1	2.10246
AT3G11930	OG0008854	Stele1	2.06721
AT2G30860	OG0018126	Stele1	2.03282
AT2G33830	OG0003237	Stele1	1.81817
AT4G14130	OG0014989	Stele1	1.80484
AT4G11210	OG0001069	Stele1	1.77946
AT4G22212	OG0006544	Stele1	1.74962
AT1G62480	OG0017964	Stele1	1.67183
AT3G11630	OG0006296	Stele1	1.61348
AT1G26450	OG0017888	Stele1	1.57541
AT2G34140	OG0001405	Stele1	1.52876
AT5G24800	OG0009680	Stele1	1.52534
AT1G52300	OG0001806	Stele1	1.51424
AT3G45700	OG0000437	Stele1	1.51327
AT3G28600	OG0011961	Stele1	1.50046
AT5G56540	OG0005714	Stele1	1.49609
AT2G37040	OG0000756	Stele1	1.4766
AT4G18100	OG0003604	Stele1	1.47188
AT1G62380	OG0018003	Stele1	1.4562
AT5G02960	OG0001173	Stele1	1.41076
AT1G27130	OG0010699	Stele1	1.4091
AT4G22570	OG0002277	Stele1	1.40095
AT3G25520	OG0002658	Stele1	1.39415
AT5G15200	OG0002811	Stele1	1.39011
AT1G02780	OG0001717	Stele1	1.38628
AT5G05790	OG0012034	Stele1	1.38208
AT5G28060	OG0000627	Stele1	1.38036
AT4G15000	OG0001982	Stele1	1.38015
AT1G13440	OG0001373	Stele1	1.37987
AT4G05120	OG0000711	Stele1	1.37636
AT3G18280	OG0001811	Stele1	1.36274
AT2G36160	OG0002565	Stele1	1.36236
AT1G10370	OG0001082	Stele1	1.35782
AT1G14890	OG0014444	Stele1	1.35618
AT4G00100	OG0001954	Stele1	1.35333
AT1G70600	OG0004023	Stele1	1.33197
AT2G30490	OG0011638	Stele1	1.33036
AT3G04400	OG0000832	Stele1	1.32991
AT2G45470	OG0008241	Stele1	1.32984
AT4G39200	OG0003344	Stele1	1.32192
AT5G15960	OG0018712	Stele1	1.3158
AT3G24830	OG0002612	Stele1	1.31533
AT1G07770	OG0001792	Stele1	1.31028
AT3G48930	OG0000930	Stele1	1.30766
AT1G75750	OG0014615	Stele1	1.30589
AT4G34050	OG0003618	Stele1	1.28657
AT4G18730	OG0000746	Stele1	1.28636
AT5G18380	OG0001485	Stele1	1.28265
AT3G11940	OG0003292	Stele1	1.27777
AT2G34480	OG0001732	Stele1	1.27759
AT3G49910	OG0002631	Stele1	1.27425
AT4G17390	OG0001567	Stele1	1.27322
AT1G43170	OG0001061	Stele1	1.26809
AT3G11510	OG0002565	Stele1	1.26545
AT2G30395	OG0005843	Stele1	1.26533
AT2G30400	OG0001334	Stele1	1.2596
AT5G46700	OG0013013	Stele1	1.25739
AT4G30460	OG0006629	Stele1	1.25538
AT3G59930	OG0003234	Stele1	1.24938
AT3G61110	OG0006226	Stele1	1.24869
AT4G26320	OG0005714	Stele1	1.2364
AT4G29100	OG0001457	Stele1	1.23463
AT3G25780	OG0002232	Stele1	1.23359
AT1G63180	OG0005443	Stele1	1.2316
AT4G18170	OG0018495	Stele1	1.22729
AT5G27850	OG0002614	Stele1	1.22668
AT4G15340	OG0004267	Stele1	1.22335
AT2G22860	OG0000716	Stele1	1.21953
AT4G27090	OG0002550	Stele1	1.21899
AT4G09800	OG0001342	Stele1	1.2178
AT2G27530	OG0001759	Stele1	1.2143
AT5G41520	OG0001208	Stele1	1.21179
AT3G59540	OG0006060	Stele1	1.21086
AT5G17760	OG0006182	Stele1	1.21074
AT5G19875	OG0008129	Stele1	1.20974
AT1G77940	OG0001745	Stele1	1.20854
AT2G42910	OG0004565	Stele1	1.20617
AT3G49010	OG0002643	Stele1	1.20431
AT3G60450	OG0006333	Stele1	1.20053
AT5G02450	OG0002462	Stele1	1.19975
AT2G43120	OG0003335	Stele1	1.19968
AT3G43430	OG0018368	Stele1	1.19849
AT2G47610	OG0001454	Stele1	1.19842
AT2G47110	OG0002288	Stele1	1.19433
AT1G67430	OG0004105	Stele1	1.19363
AT4G34600	OG0004386	Stele1	1.19148
AT2G27710	OG0000377	Stele1	1.1909
AT4G31700	OG0003610	Stele1	1.17117
AT1G60710	OG0001008	Stele1	1.16554
AT3G52590	OG0003390	Stele1	1.16296
AT2G19730	OG0006112	Stele1	1.16254
AT5G39740	OG0002658	Stele1	1.16101
AT3G53740	OG0002462	Stele1	1.16036
AT3G03990	OG0008694	Stele1	1.15032
AT5G47700	OG0014637	Stele1	1.14924
AT2G43460	OG0006060	Stele1	1.14862
AT1G72370	OG0001378	Stele1	1.14799
AT1G12080	OG0017964	Stele1	1.14688
AT3G09200	OG0001127	Stele1	1.14239
AT3G02080	OG0002679	Stele1	1.14114
AT3G62870	OG0001454	Stele1	1.13218
AT3G05590	OG0002614	Stele1	1.12798
AT1G66050	OG0000567	Stele1	1.12449
AT5G07090	OG0002485	Stele1	1.1242
AT4G16720	OG0001567	Stele1	1.12368
AT3G53020	OG0003358	Stele1	1.11996
AT3G60245	OG0003476	Stele1	1.11965
AT3G53870	OG0001445	Stele1	1.1107
AT2G05220	OG0001913	Stele1	1.10858
AT3G04920	OG0000627	Stele1	1.10753
AT3G56340	OG0002481	Stele1	1.1031
AT2G05830	OG0006062	Stele1	1.10117
AT5G02870	OG0001531	Stele1	1.09871
AT1G69620	OG0001328	Stele1	1.0975
AT5G09650	OG0006911	Stele1	1.09724
AT1G76410	OG0000409	Stele1	1.0958
AT4G34230	OG0009119	Stele1	1.09145
AT3G09500	OG0002539	Stele1	1.0898
AT5G27770	OG0002622	Stele1	1.08756
AT2G18020	OG0002512	Stele1	1.08742
AT2G44160	OG0006084	Stele1	1.08456
AT4G09320	OG0006621	Stele1	1.08344
AT2G35120	OG0004514	Stele1	1.08002
AT2G13820	OG0000893	Stele1	1.07844
AT5G11670	OG0000252	Stele1	1.0755
AT2G27720	OG0000377	Stele1	1.06719
AT1G18540	OG0001374	Stele1	1.06569
AT1G57660	OG0001290	Stele1	1.06562
AT3G04840	OG0000932	Stele1	1.06559
AT1G66230	OG0000321	Stele1	1.06433
AT2G36530	OG0001890	Stele1	1.06406
AT5G28080	OG0004747	Stele1	1.064
AT1G71692	OG0004288	Stele1	1.06164
AT1G70670	OG0001315	Stele1	1.05991
AT5G14180	OG0002111	Stele1	1.05881
AT5G03610	OG0004598	Stele1	1.05674
AT3G23390	OG0001185	Stele1	1.05092
AT1G43910	OG0007463	Stele1	1.0509
AT2G21580	OG0003344	Stele1	1.04952
AT1G23760	OG0000824	Stele1	1.04812
AT1G23290	OG0004023	Stele1	1.04764
AT5G60390	OG0000174	Stele1	1.03747
AT1G30230	OG0004358	Stele1	1.03247
AT4G33700	OG0000713	Stele1	1.03017
AT3G53890	OG0001158	Stele1	1.0287
AT2G01250	OG0000924	Stele1	1.02662
AT5G46710	OG0002429	Stele1	1.0258
AT3G02560	OG0018360	Stele1	1.02469
AT5G56710	OG0003373	Stele1	1.02455
AT1G02500	OG0000723	Stele1	1.02444
AT2G33370	OG0000832	Stele1	1.02282
AT3G62250	OG0002288	Stele1	1.01919
AT5G19510	OG0009419	Stele1	1.0139
AT4G33865	OG0001956	Stele1	1.01197
AT1G01100	OG0014637	Stele1	1.01032
AT1G04270	OG0001335	Stele1	1.00812
AT1G22780	OG0001342	Stele1	1.00531
AT5G43380	OG0000227	Stele1	1.00515
AT2G39460	OG0001863	Stele1	1.00425
AT1G34030	OG0001342	Stele1	1.00414
AT1G33140	OG0000591	Stele1	1.00245
AT5G20720	OG0003689	Stele1	1.00129
AT3G60770	OG0001954	Stele1	0.997574
AT1G71880	OG0003003	Stele1	0.989797
AT2G37190	OG0000905	Stele1	0.988572
AT5G46590	OG0003198	Stele1	0.985959
AT2G41840	OG0001045	Stele1	0.985958
AT3G06700	OG0003540	Stele1	0.978131
AT1G33120	OG0000591	Stele1	0.977732
AT3G56020	OG0005539	Stele1	0.9757
AT3G05560	OG0002622	Stele1	0.971547
AT2G34340	OG0004028	Stele1	0.968633
AT3G53430	OG0000905	Stele1	0.968434
AT5G26340	OG0012819	Stele1	0.96654
AT5G47210	OG0018542	Stele1	0.966096
AT5G61170	OG0002679	Stele1	0.96358
AT5G22650	OG0001993	Stele1	0.961238
AT1G14320	OG0003020	Stele1	0.961009
AT3G55750	OG0001017	Stele1	0.956241
AT1G48850	OG0005706	Stele1	0.954967
AT5G03300	OG0002674	Stele1	0.954596
AT1G16350	OG0003997	Stele1	0.954568
AT4G34670	OG0000932	Stele1	0.954371
AT5G23740	OG0000930	Stele1	0.947945
AT3G26760	OG0001988	Stele1	0.947837
AT5G16130	OG0018360	Stele1	0.943638
AT3G18740	OG0001745	Stele1	0.94281
AT2G17360	OG0002485	Stele1	0.93961
AT5G16010	OG0003695	Stele1	0.938445
AT5G54980	OG0009592	Stele1	0.934213
AT5G12020	OG0002776	Stele1	0.934155
AT3G03780	OG0001499	Stele1	0.933386
AT3G14600	OG0001732	Stele1	0.933212
AT5G24760	OG0006922	Stele1	0.93261
AT1G05260	OG0000492	Meristem_Endocortex	5.361
AT4G11290	OG0000492	Meristem_Endocortex	4.57272
AT3G22600	OG0000426	Meristem_Endocortex	3.70149
AT2G14900	OG0001100	Meristem_Endocortex	3.63829
AT3G45070	OG0000049	Meristem_Endocortex	3.16573
AT1G13420	OG0000049	Meristem_Endocortex	2.76313
AT5G20820	OG0001233	Meristem_Endocortex	2.72989
AT3G22620	OG0001760	Meristem_Endocortex	2.5887
AT3G32980	OG0004523	Meristem_Endocortex	2.40237
AT1G69930	OG0010699	Meristem_Endocortex	2.3929
AT4G05100	OG0012248	Meristem_Endocortex	2.28126
AT4G11190	OG0001069	Meristem_Endocortex	2.21213
AT5G57620	OG0001501	Meristem_Endocortex	2.12462
AT3G11660	OG0004539	Meristem_Endocortex	2.11277
AT1G02900	OG0002297	Meristem_Endocortex	2.10129
AT3G17820	OG0000500	Meristem_Endocortex	2.09127
AT2G37170	OG0000292	Meristem_Endocortex	1.96531
AT1G72630	OG0004230	Meristem_Endocortex	1.86913
AT5G28020	OG0014968	Meristem_Endocortex	1.83859
AT5G04120	OG0008533	Meristem_Endocortex	1.79229
AT5G40450	OG0013259	Meristem_Endocortex	1.71073
AT2G43340	OG0004305	Meristem_Endocortex	1.64436
AT4G22110	OG0007691	Meristem_Endocortex	1.61928
AT2G37180	OG0000292	Meristem_Endocortex	1.61209
AT3G09390	OG0004805	Meristem_Endocortex	1.58118
AT2G16720	OG0018189	Meristem_Endocortex	1.57049
AT1G17300	OG0014482	Meristem_Endocortex	1.5528
AT1G75750	OG0014615	Meristem_Endocortex	1.54374
AT4G18930	OG0006707	Meristem_Endocortex	1.5346
AT2G34070	OG0001348	Meristem_Endocortex	1.52864
AT5G36180	OG0000098	Meristem_Endocortex	1.51418
AT3G16240	OG0000929	Meristem_Endocortex	1.50298
AT5G64570	OG0006921	Meristem_Endocortex	1.48217
AT2G36830	OG0008321	Meristem_Endocortex	1.47222
AT1G52760	OG0014600	Meristem_Endocortex	1.46522
AT1G72940	OG0000693	Meristem_Endocortex	1.45981
AT1G09560	OG0001289	Meristem_Endocortex	1.4544
AT3G06778	OG0012212	Meristem_Endocortex	1.43509
AT2G30860	OG0018126	Meristem_Endocortex	1.39864
AT1G17190	OG0000158	Meristem_Endocortex	1.39049
AT3G53420	OG0000292	Meristem_Endocortex	1.38155
AT2G38240	OG0000888	Meristem_Endocortex	1.37633
AT1G25230	OG0003007	Meristem_Endocortex	1.36511
AT3G44870	OG0001818	Meristem_Endocortex	1.3641
AT3G61430	OG0000416	Meristem_Endocortex	1.3604
AT5G61820	OG0009379	Meristem_Endocortex	1.35952
AT3G61890	OG0003387	Meristem_Endocortex	1.32102
AT4G21830	OG0018564	Meristem_Endocortex	1.31994
AT4G09030	OG0017958	Meristem_Endocortex	1.30515
AT1G69490	OG0007731	Meristem_Endocortex	1.30489
AT2G29980	OG0004547	Meristem_Endocortex	1.29977
AT2G27510	OG0000917	Meristem_Endocortex	1.29911
AT5G23220	OG0009614	Meristem_Endocortex	1.27393
AT4G26320	OG0005714	Meristem_Endocortex	1.26476
AT3G09032	OG0018305	Meristem_Endocortex	1.26229
AT2G40970	OG0003245	Meristem_Endocortex	1.24747
AT3G59620	OG0005837	Meristem_Endocortex	1.24197
AT4G36640	OG0005371	Meristem_Endocortex	1.2339
AT3G09940	OG0004664	Meristem_Endocortex	1.22643
AT2G28305	OG0000428	Meristem_Endocortex	1.19635
AT1G23040	OG0014455	Meristem_Endocortex	1.1959
AT4G16447	OG0018462	Meristem_Endocortex	1.19079
AT5G46890	OG0003760	Meristem_Endocortex	1.18364
AT1G29195	OG0005487	Meristem_Endocortex	1.18309
AT1G11580	OG0004056	Meristem_Endocortex	1.17359
AT4G31800	OG0000706	Meristem_Endocortex	1.17201
AT4G24220	OG0001212	Meristem_Endocortex	1.17168
AT4G30530	OG0001884	Meristem_Endocortex	1.17097
AT1G19450	OG0002949	Meristem_Endocortex	1.16774
AT5G07010	OG0000049	Meristem_Endocortex	1.14625
AT1G11210	OG0007637	Meristem_Endocortex	1.14295
AT1G03790	OG0014671	Meristem_Endocortex	1.13156
AT3G22830	OG0001929	Meristem_Endocortex	1.13128
AT5G37540	OG0010743	Meristem_Endocortex	1.12642
AT5G59590	OG0000754	Meristem_Endocortex	1.11141
AT3G18820	OG0002286	Meristem_Endocortex	1.10006
AT3G44320	OG0014935	Meristem_Endocortex	1.09277
AT1G49660	OG0000811	Meristem_Endocortex	1.08091
AT4G23100	OG0006645	Meristem_Endocortex	1.07977
AT2G44790	OG0008148	Meristem_Endocortex	1.07138
AT3G02780	OG0006264	Meristem_Endocortex	1.06852
AT4G25100	OG0002725	Meristem_Endocortex	1.06613
AT4G29700	OG0015116	Meristem_Endocortex	1.06333
AT5G65390	OG0011617	Meristem_Endocortex	1.06041
AT2G41660	OG0014791	Meristem_Endocortex	1.05317
AT5G24580	OG0013037	Meristem_Endocortex	1.04348
AT5G13220	OG0015269	Meristem_Endocortex	1.03985
AT3G25290	OG0000774	Meristem_Endocortex	1.03704
AT5G18690	OG0004485	Meristem_Endocortex	1.03194
AT5G13180	OG0014744	Meristem_Endocortex	1.0313
AT5G25770	OG0013253	Meristem_Endocortex	1.0307
AT4G01070	OG0002372	Meristem_Endocortex	1.02554
AT1G01360	OG0000724	Meristem_Endocortex	1.02059
AT1G28330	OG0003237	Meristem_Endocortex	1.0177
AT3G02770	OG0001166	Meristem_Endocortex	1.01248
AT3G03990	OG0008694	Meristem_Endocortex	1.00881
AT2G02710	OG0006152	Meristem_Endocortex	1.00111
AT5G43910	OG0004967	Meristem_Endocortex	1.00092
AT3G15810	OG0004077	Meristem_Endocortex	0.99927
AT4G12510	OG0000499	Meristem_Endocortex	0.993895
AT1G55330	OG0005714	Meristem_Endocortex	0.992349
AT3G01513	OG0018328	Meristem_Endocortex	0.991472
AT5G49800	OG0012909	Meristem_Endocortex	0.985483
AT1G20190	OG0002396	Meristem_Endocortex	0.983325
AT5G66580	OG0000425	Meristem_Endocortex	0.978558
AT1G12090	OG0000499	Meristem_Endocortex	0.976959
AT5G42650	OG0005122	Meristem_Endocortex	0.970997
AT4G34050	OG0003618	Meristem_Endocortex	0.970607
AT1G43160	OG0001421	Meristem_Endocortex	0.953162
AT4G16380	OG0000202	Meristem_Endocortex	0.953059
AT1G22470	OG0001787	Meristem_Endocortex	0.951505
AT1G21980	OG0003995	Meristem_Endocortex	0.950636
AT1G70670	OG0001315	Meristem_Endocortex	0.949161
AT4G01410	OG0015081	Meristem_Endocortex	0.947605
AT5G04340	OG0000325	Meristem_Endocortex	0.947249
AT3G22240	OG0001354	Meristem_Endocortex	0.947163
AT1G65890	OG0001296	Meristem_Endocortex	0.944551
AT2G16700	OG0008305	Meristem_Endocortex	0.943019
AT3G19100	OG0001313	Meristem_Endocortex	0.942453
AT1G77120	OG0005558	Meristem_Endocortex	0.939787
AT5G62520	OG0001311	Meristem_Endocortex	0.937911
AT3G10985	OG0006361	Meristem_Endocortex	0.937351
AT2G46680	OG0003387	Meristem_Endocortex	0.931162
AT4G08770	OG0004523	Meristem_Endocortex	0.930819
AT4G04830	OG0006698	Meristem_Endocortex	0.926711
AT1G27760	OG0001774	Meristem_Endocortex	0.923181
AT5G57150	OG0004960	Meristem_Endocortex	0.920911
AT5G05410	OG0018406	Meristem_Endocortex	0.920439
AT4G39030	OG0006153	Meristem_Endocortex	0.918638
AT3G23090	OG0001155	Meristem_Endocortex	0.918028
AT5G43760	OG0017980	Meristem_Endocortex	0.914474
AT5G65790	OG0001501	Meristem_Endocortex	0.911789
AT2G21130	OG0001113	Meristem_Endocortex	0.908964
AT2G47930	OG0004485	Meristem_Endocortex	0.90767
AT2G45680	OG0004467	Meristem_Endocortex	0.907337
AT3G24420	OG0012143	Meristem_Endocortex	0.905989
AT2G02990	OG0004104	Meristem_Endocortex	0.905637
AT3G04520	OG0003117	Meristem_Endocortex	0.8969
AT2G17450	OG0000409	Meristem_Endocortex	0.895684
AT1G55210	OG0007716	Meristem_Endocortex	0.889624
AT3G53600	OG0018136	Meristem_Endocortex	0.888935
AT5G46900	OG0003760	Meristem_Endocortex	0.887072
AT5G61890	OG0009387	Meristem_Endocortex	0.885263
AT1G78100	OG0014559	Meristem_Endocortex	0.88268
AT1G69295	OG0017888	Meristem_Endocortex	0.882512
AT5G63790	OG0015150	Meristem_Endocortex	0.879272
AT1G74950	OG0000817	Meristem_Endocortex	0.878408
AT1G44170	OG0007523	Meristem_Endocortex	0.877768
AT3G17810	OG0011906	Meristem_Endocortex	0.874482
AT3G44326	OG0000616	Meristem_Endocortex	0.873329
AT4G28240	OG0015046	Meristem_Endocortex	0.871989
AT1G62370	OG0001829	Meristem_Endocortex	0.869413
AT3G55720	OG0003485	Meristem_Endocortex	0.86693
AT2G46510	OG0001807	Meristem_Endocortex	0.864779
AT1G76690	OG0001004	Meristem_Endocortex	0.856992
AT5G47240	OG0009440	Meristem_Endocortex	0.851949
AT3G57520	OG0011969	Meristem_Endocortex	0.848503
AT1G53180	OG0014517	Meristem_Endocortex	0.847842
AT1G09090	OG0005452	Meristem_Endocortex	0.838231
AT3G10525	OG0018436	Meristem_Endocortex	0.827991
AT5G60460	OG0005008	Meristem_Endocortex	0.827567
AT1G13195	OG0001680	Meristem_Endocortex	0.827315
AT1G76790	OG0000810	Meristem_Endocortex	0.826933
AT3G14310	OG0002252	Meristem_Endocortex	0.821543
AT3G13520	OG0005714	Meristem_Endocortex	0.821101
AT5G10300	OG0000178	Meristem_Endocortex	0.819847
AT4G39980	OG0001057	Meristem_Endocortex	0.818524
AT5G18680	OG0018399	Meristem_Endocortex	0.812063
AT1G35260	OG0000813	Meristem_Endocortex	0.811259
AT1G61795	OG0000330	Meristem_Endocortex	0.811084
AT4G35080	OG0003362	Meristem_Endocortex	0.810936
AT4G02590	OG0001735	Meristem_Endocortex	0.80984
AT1G62975	OG0002407	Meristem_Endocortex	0.804275
AT2G18193	OG0014760	Meristem_Endocortex	0.7958
AT4G25030	OG0003634	Meristem_Endocortex	0.7955
AT3G23690	OG0004621	Meristem_Endocortex	0.795071
AT1G61590	OG0005634	Meristem_Endocortex	0.790427
AT1G65840	OG0002959	Meristem_Endocortex	0.789414
AT5G54390	OG0006814	Meristem_Endocortex	0.782243
AT4G12520	OG0000499	Meristem_Endocortex	0.778193
AT2G30870	OG0018126	Meristem_Endocortex	0.77775
AT3G61440	OG0006375	Meristem_Endocortex	0.777621
AT5G56540	OG0005714	Meristem_Endocortex	0.777094
AT3G22890	OG0001086	Meristem_Endocortex	0.775633
AT3G50800	OG0000425	Meristem_Endocortex	0.764923
AT5G19520	OG0006759	Meristem_Endocortex	0.763326
AT1G16370	OG0017722	Meristem_Endocortex	0.757618
AT2G39800	OG0006156	Meristem_Endocortex	0.757231
AT1G69760	OG0014509	Meristem_Endocortex	0.749948
AT5G52310	OG0012366	Meristem_Endocortex	0.746042
AT5G51040	OG0013289	Meristem_Endocortex	0.744058
AT3G24120	OG0000942	Meristem_Endocortex	0.743763
AT3G22540	OG0006353	Meristem_Endocortex	0.743632
AT4G30960	OG0000951	Meristem_Endocortex	0.740511
AT3G47960	OG0001366	Meristem_Endocortex	0.737755
AT3G07460	OG0003546	Meristem_Endocortex	0.735112
AT4G01150	OG0002038	Meristem_Endocortex	0.734793
AT5G54160	OG0009434	Meristem_Endocortex	0.732764
AT1G76240	OG0001333	Meristem_Endocortex	0.73075
AT3G23000	OG0004754	Meristem_Endocortex	0.728425
AT4G12545	OG0015071	Atrichoblast1	4.04688
AT4G12550	OG0015071	Atrichoblast1	3.86257
AT1G70850	OG0000813	Atrichoblast1	3.25028
AT2G37130	OG0011420	Atrichoblast1	3.08059
AT1G14960	OG0000678	Atrichoblast1	2.96892
AT1G65310	OG0010871	Atrichoblast1	2.85516
AT1G73260	OG0001314	Atrichoblast1	2.72448
AT2G43590	OG0001138	Atrichoblast1	2.61343
AT1G19020	OG0000858	Atrichoblast1	2.5872
AT4G19030	OG0002542	Atrichoblast1	2.44196
AT4G30280	OG0010871	Atrichoblast1	2.42607
AT2G17500	OG0000887	Atrichoblast1	2.26007
AT2G37750	OG0002470	Atrichoblast1	2.24523
AT5G64100	OG0018710	Atrichoblast1	2.22268
AT1G14870	OG0000250	Atrichoblast1	2.18557
AT5G07460	OG0002729	Atrichoblast1	2.16932
AT3G09260	OG0001305	Atrichoblast1	2.15895
AT5G14360	OG0006955	Atrichoblast1	2.13496
AT4G21840	OG0018564	Atrichoblast1	2.06335
AT2G46740	OG0002299	Atrichoblast1	2.054
AT2G39530	OG0001134	Atrichoblast1	2.00646
AT5G19230	OG0003416	Atrichoblast1	1.99507
AT2G38870	OG0000106	Atrichoblast1	1.98183
AT3G29250	OG0001440	Atrichoblast1	1.9793
AT1G78000	OG0002322	Atrichoblast1	1.96503
AT5G10695	OG0000782	Atrichoblast1	1.93307
AT4G30290	OG0010871	Atrichoblast1	1.87758
AT4G20860	OG0003627	Atrichoblast1	1.8678
AT2G39040	OG0001142	Atrichoblast1	1.83648
AT3G29035	OG0000378	Atrichoblast1	1.79114
AT3G49580	OG0000765	Atrichoblast1	1.78367
AT3G08030	OG0006291	Atrichoblast1	1.74779
AT4G23400	OG0000416	Atrichoblast1	1.68365
AT5G43580	OG0000106	Atrichoblast1	1.66138
AT3G19660	OG0008778	Atrichoblast1	1.64216
AT2G43820	OG0000331	Atrichoblast1	1.61529
AT5G48010	OG0004267	Atrichoblast1	1.60831
AT2G23810	OG0003261	Atrichoblast1	1.57132
AT5G44380	OG0011400	Atrichoblast1	1.56955
AT2G34500	OG0001887	Atrichoblast1	1.5645
AT2G45400	OG0011434	Atrichoblast1	1.54165
AT3G16400	OG0005837	Atrichoblast1	1.53921
AT1G07590	OG0010616	Atrichoblast1	1.52059
AT2G37640	OG0001441	Atrichoblast1	1.51391
AT5G06860	OG0001168	Atrichoblast1	1.50448
AT5G41080	OG0006447	Atrichoblast1	1.49833
AT4G20780	OG0002032	Atrichoblast1	1.48768
AT1G06120	OG0003192	Atrichoblast1	1.4845
AT3G15356	OG0005469	Atrichoblast1	1.47169
AT1G25275	OG0011246	Atrichoblast1	1.42986
AT2G31570	OG0018186	Atrichoblast1	1.4277
AT4G35750	OG0004870	Atrichoblast1	1.40929
AT3G24500	OG0012158	Atrichoblast1	1.40485
AT3G15370	OG0018348	Atrichoblast1	1.38476
AT5G46900	OG0003760	Atrichoblast1	1.373
AT4G27410	OG0015123	Atrichoblast1	1.37067
AT3G28740	OG0000135	Atrichoblast1	1.36869
AT3G14595	OG0001308	Atrichoblast1	1.35964
AT1G30700	OG0002385	Atrichoblast1	1.35402
AT5G19240	OG0003416	Atrichoblast1	1.348
AT5G40690	OG0012865	Atrichoblast1	1.34292
AT1G08930	OG0002302	Atrichoblast1	1.3313
AT5G45280	OG0009044	Atrichoblast1	1.3235
AT1G05340	OG0001354	Atrichoblast1	1.31682
AT2G29460	OG0004518	Atrichoblast1	1.31484
AT5G20150	OG0005952	Atrichoblast1	1.27893
AT1G14860	OG0001299	Atrichoblast1	1.27631
AT5G27760	OG0003451	Atrichoblast1	1.27319
AT3G16420	OG0000083	Atrichoblast1	1.2683
AT3G14770	OG0004666	Atrichoblast1	1.26583
AT2G31090	OG0008456	Atrichoblast1	1.26384
AT1G76070	OG0003985	Atrichoblast1	1.25908
AT1G10140	OG0000585	Atrichoblast1	1.25605
AT1G22400	OG0000487	Atrichoblast1	1.25229
AT1G70790	OG0017683	Atrichoblast1	1.25031
AT5G13750	OG0000965	Atrichoblast1	1.24656
AT4G20830	OG0005604	Atrichoblast1	1.24187
AT5G13080	OG0003424	Atrichoblast1	1.23482
AT4G16190	OG0002564	Atrichoblast1	1.23379
AT4G25830	OG0004908	Atrichoblast1	1.22575
AT2G01670	OG0001299	Atrichoblast1	1.22461
AT2G38750	OG0005885	Atrichoblast1	1.22255
AT1G03220	OG0000834	Atrichoblast1	1.22163
AT3G28940	OG0006327	Atrichoblast1	1.21622
AT3G01190	OG0000773	Atrichoblast1	1.21545
AT3G15500	OG0017876	Atrichoblast1	1.21342
AT5G66170	OG0003239	Atrichoblast1	1.21319
AT4G36500	OG0008168	Atrichoblast1	1.19248
AT1G78830	OG0003129	Atrichoblast1	1.18699
AT2G25735	OG0002532	Atrichoblast1	1.18151
AT3G19030	OG0010614	Atrichoblast1	1.1777
AT4G37010	OG0008577	Atrichoblast1	1.17621
AT1G56300	OG0002956	Atrichoblast1	1.17307
AT4G13395	OG0012602	Atrichoblast1	1.17171
AT5G46890	OG0003760	Atrichoblast1	1.16854
AT5G57910	OG0002712	Atrichoblast1	1.16642
AT3G21710	OG0004832	Atrichoblast1	1.15606
AT4G13180	OG0002636	Atrichoblast1	1.14554
AT4G00430	OG0000416	Atrichoblast1	1.14407
AT5G26260	OG0000112	Atrichoblast1	1.14285
AT4G24340	OG0009216	Atrichoblast1	1.13356
AT4G37070	OG0015037	Atrichoblast1	1.13212
AT2G30130	OG0008318	Atrichoblast1	1.13146
AT3G49780	OG0000716	Atrichoblast1	1.1308
AT3G44860	OG0001818	Atrichoblast1	1.12292
AT3G04720	OG0001545	Atrichoblast1	1.12255
AT5G25450	OG0003664	Atrichoblast1	1.11997
AT1G73010	OG0000861	Atrichoblast1	1.11304
AT3G15630	OG0003138	Atrichoblast1	1.10746
AT3G14260	OG0000563	Atrichoblast1	1.10554
AT3G04010	OG0018320	Atrichoblast1	1.10144
AT2G39110	OG0002484	Atrichoblast1	1.0965
AT5G39580	OG0015166	Atrichoblast1	1.09368
AT3G49845	OG0001354	Atrichoblast1	1.09163
AT3G19010	OG0003509	Atrichoblast1	1.08758
AT3G28210	OG0012013	Atrichoblast1	1.07125
AT1G53830	OG0002252	Atrichoblast1	1.07056
AT3G49870	OG0006300	Atrichoblast1	1.06505
AT4G15610	OG0006439	Atrichoblast1	1.06417
AT3G10815	OG0006006	Atrichoblast1	1.06242
AT4G23870	OG0018503	Atrichoblast1	1.06099
AT1G04040	OG0014670	Atrichoblast1	1.05491
AT5G54840	OG0001999	Atrichoblast1	1.04693
AT2G29995	OG0011268	Atrichoblast1	1.04487
AT5G47990	OG0000176	Atrichoblast1	1.04466
AT5G67620	OG0009807	Atrichoblast1	1.04226
AT5G40890	OG0012171	Atrichoblast1	1.0359
AT3G50260	OG0000489	Atrichoblast1	1.03039
AT3G09390	OG0004805	Atrichoblast1	1.02969
AT3G17790	OG0014890	Atrichoblast1	1.02921
AT4G19230	OG0004958	Atrichoblast1	1.02859
AT4G32480	OG0003242	Atrichoblast1	1.02357
AT1G67920	OG0007703	Atrichoblast1	1.02159
AT3G28910	OG0000160	Atrichoblast1	1.02015
AT4G15760	OG0003673	Atrichoblast1	1.01924
AT1G71950	OG0010659	Atrichoblast1	1.01916
AT4G02940	OG0004401	Atrichoblast1	1.01753
AT2G24550	OG0000613	Atrichoblast1	1.01608
AT4G30390	OG0018524	Atrichoblast1	1.01536
AT4G04610	OG0002411	Atrichoblast1	1.01502
AT1G22280	OG0004299	Atrichoblast1	1.00929
AT1G47128	OG0001064	Atrichoblast1	1.00847
AT1G80920	OG0004146	Atrichoblast1	1.00732
AT2G20670	OG0003242	Atrichoblast1	1.00656
AT4G32150	OG0003326	Atrichoblast1	1.00353
AT5G13190	OG0012914	Atrichoblast1	0.999339
AT1G58190	OG0001815	Atrichoblast1	0.990906
AT3G51730	OG0006183	Atrichoblast1	0.986234
AT5G06300	OG0000428	Atrichoblast1	0.984634
AT1G32460	OG0007568	Atrichoblast1	0.984414
AT1G80180	OG0001718	Atrichoblast1	0.983025
AT5G65300	OG0001787	Atrichoblast1	0.979346
AT3G63310	OG0004099	Atrichoblast1	0.977855
AT4G10380	OG0012468	Atrichoblast1	0.975083
AT3G29350	OG0000560	Atrichoblast1	0.973175
AT1G30730	OG0007893	Atrichoblast1	0.967078
AT2G22880	OG0001448	Atrichoblast1	0.965075
AT2G29500	OG0000557	Atrichoblast1	0.962321
AT1G74020	OG0014701	Atrichoblast1	0.961728
AT2G29470	OG0004518	Atrichoblast1	0.961399
AT3G01290	OG0000491	Atrichoblast1	0.95701
AT1G04250	OG0000838	Atrichoblast1	0.956491
AT3G14850	OG0014929	Atrichoblast1	0.952549
AT3G47340	OG0001939	Atrichoblast1	0.950952
AT3G05165	OG0002302	Atrichoblast1	0.950872
AT2G33150	OG0004162	Atrichoblast1	0.947181
AT4G39670	OG0012507	Atrichoblast1	0.942072
AT5G16830	OG0001217	Atrichoblast1	0.938704
AT3G29780	OG0014892	Atrichoblast1	0.936714
AT2G45760	OG0014742	Atrichoblast1	0.934614
AT5G42380	OG0000871	Atrichoblast1	0.930473
AT5G02020	OG0000606	Atrichoblast1	0.928874
AT3G61190	OG0014742	Atrichoblast1	0.92748
AT5G59820	OG0006077	Atrichoblast1	0.925195
AT2G41810	OG0011432	Atrichoblast1	0.923175
AT2G27830	OG0001484	Atrichoblast1	0.921981
AT2G41380	OG0001104	Atrichoblast1	0.921086
AT3G59710	OG0006254	Atrichoblast1	0.92013
AT4G33666	OG0018074	Atrichoblast1	0.916416
AT1G66580	OG0003020	Atrichoblast1	0.906617
AT3G05390	OG0008566	Atrichoblast1	0.906532
AT4G29270	OG0004911	Atrichoblast1	0.902206
AT3G11780	OG0002007	Atrichoblast1	0.898345
AT5G59030	OG0000898	Atrichoblast1	0.895277
AT3G53480	OG0004443	Atrichoblast1	0.895054
AT5G54940	OG0018682	Atrichoblast1	0.894997
AT5G39610	OG0000378	Atrichoblast1	0.894606
AT1G64200	OG0001778	Atrichoblast1	0.890092
AT5G24140	OG0013151	Atrichoblast1	0.886656
AT1G15010	OG0003207	Atrichoblast1	0.88628
AT3G48890	OG0001523	Atrichoblast1	0.882263
AT4G13510	OG0001984	Atrichoblast1	0.881663
AT2G39420	OG0004419	Atrichoblast1	0.880327
AT1G32928	OG0001093	Atrichoblast1	0.87822
AT5G01750	OG0003065	Atrichoblast1	0.877508
AT4G38060	OG0002050	Atrichoblast1	0.875944
AT1G18980	OG0002221	Atrichoblast1	0.874584
AT1G52342	OG0000329	Atrichoblast1	0.874133
AT1G23060	OG0014462	Atrichoblast1	0.873121
AT1G60730	OG0001008	Atrichoblast1	0.870101
AT1G62980	OG0007946	Trichoblast2	2.72561
AT1G12560	OG0007946	Trichoblast2	2.61994
AT5G05500	OG0013196	Trichoblast2	2.5488
AT5G17820	OG0003025	Trichoblast2	2.53617
AT2G01540	OG0017683	Trichoblast2	2.50611
AT1G58270	OG0000112	Trichoblast2	2.3739
AT1G30870	OG0011021	Trichoblast2	2.3733
AT4G01480	OG0000287	Trichoblast2	2.3052
AT2G34910	OG0003155	Trichoblast2	2.24902
AT3G09925	OG0014922	Trichoblast2	2.20062
AT4G34580	OG0001117	Trichoblast2	2.05826
AT3G19390	OG0014880	Trichoblast2	1.98923
AT5G54490	OG0000430	Trichoblast2	1.97664
AT3G54040	OG0002004	Trichoblast2	1.92253
AT3G54580	OG0010768	Trichoblast2	1.89696
AT3G07880	OG0001407	Trichoblast2	1.87229
AT2G47650	OG0000515	Trichoblast2	1.8451
AT1G27740	OG0004151	Trichoblast2	1.83022
AT1G48930	OG0011073	Trichoblast2	1.80924
AT3G61560	OG0000609	Trichoblast2	1.79037
AT5G58010	OG0009407	Trichoblast2	1.78709
AT4G33467	OG0009325	Trichoblast2	1.70505
AT2G24260	OG0004515	Trichoblast2	1.70301
AT1G35670	OG0001368	Trichoblast2	1.69934
AT5G22410	OG0002774	Trichoblast2	1.68561
AT2G41970	OG0003307	Trichoblast2	1.68144
AT1G01750	OG0003086	Trichoblast2	1.66042
AT1G30850	OG0003155	Trichoblast2	1.65958
AT4G39675	OG0014766	Trichoblast2	1.64979
AT1G52240	OG0017911	Trichoblast2	1.647
AT4G00680	OG0003086	Trichoblast2	1.64588
AT4G26010	OG0003025	Trichoblast2	1.6349
AT5G47450	OG0000929	Trichoblast2	1.62627
AT5G67400	OG0000509	Trichoblast2	1.62379
AT3G28550	OG0010768	Trichoblast2	1.62082
AT5G40860	OG0004812	Trichoblast2	1.60392
AT4G27350	OG0009096	Trichoblast2	1.60129
AT3G23190	OG0018332	Trichoblast2	1.58772
AT3G52290	OG0001162	Trichoblast2	1.57295
AT2G39110	OG0002484	Trichoblast2	1.57106
AT2G47540	OG0005647	Trichoblast2	1.55991
AT5G41080	OG0006447	Trichoblast2	1.54753
AT3G22570	OG0000426	Trichoblast2	1.54228
AT1G23750	OG0005531	Trichoblast2	1.51409
AT3G04720	OG0001545	Trichoblast2	1.50466
AT4G09990	OG0001292	Trichoblast2	1.50414
AT1G06923	OG0005843	Trichoblast2	1.49743
AT1G05810	OG0002431	Trichoblast2	1.4925
AT4G29905	OG0000782	Trichoblast2	1.47658
AT3G24670	OG0000589	Trichoblast2	1.47387
AT5G44020	OG0014670	Trichoblast2	1.46497
AT3G05490	OG0002297	Trichoblast2	1.46454
AT4G37070	OG0015037	Trichoblast2	1.46097
AT5G05370	OG0004716	Trichoblast2	1.45756
AT2G21045	OG0003239	Trichoblast2	1.44169
AT1G63220	OG0004063	Trichoblast2	1.43057
AT5G38700	OG0003656	Trichoblast2	1.42417
AT2G39518	OG0001134	Trichoblast2	1.42059
AT2G43820	OG0000331	Trichoblast2	1.40642
AT2G04170	OG0000112	Trichoblast2	1.39592
AT1G45145	OG0010834	Trichoblast2	1.38716
AT2G46170	OG0000609	Trichoblast2	1.37973
AT1G13950	OG0000710	Trichoblast2	1.37874
AT4G22666	OG0012283	Trichoblast2	1.37774
AT4G25820	OG0015089	Trichoblast2	1.37764
AT2G46140	OG0001076	Trichoblast2	1.37008
AT5G13500	OG0003746	Trichoblast2	1.36935
AT2G32380	OG0002327	Trichoblast2	1.36216
AT2G27080	OG0005934	Trichoblast2	1.33207
AT2G25240	OG0014782	Trichoblast2	1.3271
AT2G39570	OG0008421	Trichoblast2	1.31341
AT2G31350	OG0005764	Trichoblast2	1.3129
AT4G19230	OG0004958	Trichoblast2	1.28321
AT5G40510	OG0011730	Trichoblast2	1.28168
AT4G17340	OG0000929	Trichoblast2	1.27807
AT5G11070	OG0002532	Trichoblast2	1.27467
AT3G20410	OG0000362	Trichoblast2	1.27249
AT4G15610	OG0006439	Trichoblast2	1.27082
AT4G40060	OG0001910	Trichoblast2	1.25562
AT5G67480	OG0015032	Trichoblast2	1.25225
AT5G57625	OG0018546	Trichoblast2	1.2511
AT4G23710	OG0002661	Trichoblast2	1.24282
AT1G23720	OG0010768	Trichoblast2	1.22678
AT4G24026	OG0002740	Trichoblast2	1.22193
AT1G25400	OG0011039	Trichoblast2	1.22001
AT3G56930	OG0003258	Trichoblast2	1.2166
AT3G06300	OG0006430	Trichoblast2	1.2155
AT3G26690	OG0004007	Trichoblast2	1.21419
AT3G47340	OG0001939	Trichoblast2	1.20546
AT1G54290	OG0000565	Trichoblast2	1.20398
AT3G60330	OG0000087	Trichoblast2	1.19957
AT1G56220	OG0005841	Trichoblast2	1.19901
AT5G23030	OG0017859	Trichoblast2	1.1958
AT5G56170	OG0001481	Trichoblast2	1.19528
AT5G64100	OG0018710	Trichoblast2	1.19032
AT5G13080	OG0003424	Trichoblast2	1.18938
AT3G54590	OG0010768	Trichoblast2	1.18515
AT3G49960	OG0000509	Trichoblast2	1.18324
AT2G38790	OG0014781	Trichoblast2	1.17881
AT5G24140	OG0013151	Trichoblast2	1.17728
AT2G17440	OG0005888	Trichoblast2	1.17718
AT4G22214	OG0006544	Trichoblast2	1.16263
AT4G09570	OG0001368	Trichoblast2	1.1533
AT1G14170	OG0018037	Trichoblast2	1.14868
AT3G03160	OG0004693	Trichoblast2	1.1365
AT1G70460	OG0000825	Trichoblast2	1.13573
AT4G22080	OG0010944	Trichoblast2	1.1356
AT5G39320	OG0000569	Trichoblast2	1.1351
AT1G71780	OG0005821	Trichoblast2	1.13309
AT3G15630	OG0003138	Trichoblast2	1.13262
AT1G32460	OG0007568	Trichoblast2	1.12953
AT5G48657	OG0018324	Trichoblast2	1.12927
AT2G02960	OG0007810	Trichoblast2	1.12912
AT3G18780	OG0000071	Trichoblast2	1.1279
AT3G02040	OG0006447	Trichoblast2	1.127
AT3G16390	OG0005837	Trichoblast2	1.12069
AT1G14870	OG0000250	Trichoblast2	1.12032
AT3G14280	OG0001938	Trichoblast2	1.11907
AT5G65690	OG0004927	Trichoblast2	1.11723
AT1G62660	OG0003010	Trichoblast2	1.11623
AT2G17130	OG0002492	Trichoblast2	1.11061
AT2G35730	OG0008426	Trichoblast2	1.10225
AT1G21360	OG0007475	Trichoblast2	1.0986
AT1G04280	OG0001033	Trichoblast2	1.09839
AT3G48570	OG0002002	Trichoblast2	1.09761
AT5G20150	OG0005952	Trichoblast2	1.09518
AT2G36895	OG0011651	Trichoblast2	1.08986
AT3G23600	OG0001997	Trichoblast2	1.0876
AT2G41110	OG0000259	Trichoblast2	1.08146
AT1G54970	OG0005647	Trichoblast2	1.07405
AT1G08340	OG0003102	Trichoblast2	1.07086
AT2G17720	OG0001824	Trichoblast2	1.07011
AT2G20670	OG0003242	Trichoblast2	1.05725
AT5G43830	OG0004607	Trichoblast2	1.05291
AT2G44450	OG0000261	Trichoblast2	1.046
AT4G40090	OG0011617	Trichoblast2	1.04542
AT4G39730	OG0002525	Trichoblast2	1.04249
AT2G38500	OG0014840	Trichoblast2	1.04083
AT3G21070	OG0004825	Trichoblast2	1.03722
AT2G32270	OG0001371	Trichoblast2	1.03705
AT5G65930	OG0009886	Trichoblast2	1.03502
AT2G46600	OG0000430	Trichoblast2	1.03114
AT5G66650	OG0001848	Trichoblast2	1.02935
AT5G40690	OG0012865	Trichoblast2	1.02654
AT3G62680	OG0005647	Trichoblast2	1.0241
AT2G03720	OG0002980	Trichoblast2	1.02191
AT3G05920	OG0008637	Trichoblast2	1.01921
AT1G53680	OG0000158	Trichoblast2	1.01744
AT4G02620	OG0009157	Trichoblast2	1.01741
AT1G32928	OG0001093	Trichoblast2	1.01491
AT5G46230	OG0000116	Trichoblast2	1.00878
AT5G16910	OG0001974	Trichoblast2	1.00818
AT4G37640	OG0000718	Trichoblast2	1.00724
AT4G25570	OG0004887	Trichoblast2	1.00655
AT2G34500	OG0001887	Trichoblast2	1.00314
AT2G45750	OG0002403	Trichoblast2	1.00129
AT1G14010	OG0001055	Trichoblast2	1.00023
AT5G11110	OG0004877	Trichoblast2	0.992498
AT3G17780	OG0007975	Trichoblast2	0.986596
AT3G21510	OG0000560	Trichoblast2	0.981649
AT5G54640	OG0001293	Trichoblast2	0.980843
AT3G44190	OG0002637	Trichoblast2	0.978005
AT4G35750	OG0004870	Trichoblast2	0.974984
AT5G57830	OG0003316	Trichoblast2	0.972607
AT5G11440	OG0015160	Trichoblast2	0.971594
AT5G15650	OG0000626	Trichoblast2	0.96855
AT4G30320	OG0012546	Trichoblast2	0.967487
AT1G75220	OG0002949	Trichoblast2	0.966061
AT3G01290	OG0000491	Trichoblast2	0.963825
AT1G72020	OG0005423	Trichoblast2	0.96225
AT5G27150	OG0004759	Trichoblast2	0.957812
AT1G80230	OG0001730	Trichoblast2	0.957765
AT2G39900	OG0011426	Trichoblast2	0.955117
AT2G19760	OG0000614	Trichoblast2	0.954224
AT3G21180	OG0001526	Trichoblast2	0.954015
AT3G05170	OG0004125	Trichoblast2	0.953568
AT5G44610	OG0009323	Trichoblast2	0.951097
AT4G21105	OG0004904	Trichoblast2	0.947807
AT1G09740	OG0007419	Trichoblast2	0.944856
AT4G00460	OG0007857	Trichoblast2	0.940226
AT2G17500	OG0000887	Trichoblast2	0.939558
AT4G29480	OG0004413	Trichoblast2	0.937851
AT5G61650	OG0005947	Trichoblast2	0.936964
AT5G01750	OG0003065	Trichoblast2	0.933087
AT5G56550	OG0003681	Trichoblast2	0.932121
AT3G07480	OG0008776	Trichoblast2	0.931677
AT3G51730	OG0006183	Trichoblast2	0.926278
AT5G14470	OG0008876	Trichoblast2	0.922359
AT1G80380	OG0010566	Trichoblast2	0.92166
AT1G19360	OG0002205	Trichoblast2	0.918282
AT1G19910	OG0000328	Trichoblast2	0.917443
AT2G47690	OG0008276	Trichoblast2	0.915814
AT4G20860	OG0003627	Trichoblast2	0.912443
AT5G17390	OG0018226	Trichoblast2	0.908746
AT4G24920	OG0002002	Trichoblast2	0.908496
AT5G63990	OG0002813	Trichoblast2	0.907352
AT1G70490	OG0000221	Trichoblast2	0.906594
AT5G16510	OG0006767	Trichoblast2	0.904425
AT4G39670	OG0012507	Trichoblast2	0.904262
AT4G38920	OG0000328	Trichoblast2	0.89994
AT1G12090	OG0000499	Cortex	4.25727
AT1G21310	OG0007530	Cortex	3.9541
AT2G45180	OG0014804	Cortex	3.67828
AT4G30170	OG0000509	Cortex	3.10491
AT5G13930	OG0003697	Cortex	3.02645
AT1G20190	OG0002396	Cortex	2.88272
AT1G29025	OG0010562	Cortex	2.65632
AT2G06850	OG0008132	Cortex	2.58047
AT1G75780	OG0000101	Cortex	2.18592
AT1G13930	OG0005632	Cortex	2.06865
AT1G03870	OG0002400	Cortex	2.02565
AT3G51240	OG0012080	Cortex	1.99142
AT3G44310	OG0014935	Cortex	1.92895
AT5G47990	OG0000176	Cortex	1.90542
AT4G12880	OG0005920	Cortex	1.90281
AT4G12520	OG0000499	Cortex	1.77571
AT4G23400	OG0000416	Cortex	1.76301
AT5G19520	OG0006759	Cortex	1.75914
AT5G46890	OG0003760	Cortex	1.75858
AT2G25735	OG0002532	Cortex	1.72782
AT5G23220	OG0009614	Cortex	1.72023
AT1G13420	OG0000049	Cortex	1.70206
AT5G48000	OG0001678	Cortex	1.65946
AT1G62510	OG0000499	Cortex	1.65659
AT4G12510	OG0000499	Cortex	1.62941
AT5G46900	OG0003760	Cortex	1.62462
AT1G25230	OG0003007	Cortex	1.60163
AT5G39580	OG0015166	Cortex	1.60151
AT4G20260	OG0009323	Cortex	1.59966
AT1G76090	OG0003987	Cortex	1.5961
AT2G06255	OG0004230	Cortex	1.56331
AT5G42590	OG0000084	Cortex	1.55206
AT5G65380	OG0005034	Cortex	1.5453
AT5G10430	OG0011617	Cortex	1.5359
AT1G19450	OG0002949	Cortex	1.53311
AT1G20010	OG0000101	Cortex	1.53008
AT2G02990	OG0004104	Cortex	1.5234
AT5G15230	OG0000370	Cortex	1.52044
AT4G30280	OG0010871	Cortex	1.51852
AT3G48000	OG0002279	Cortex	1.51162
AT1G58360	OG0001804	Cortex	1.50698
AT5G42250	OG0006893	Cortex	1.48992
AT5G65390	OG0011617	Cortex	1.44237
AT4G35100	OG0018590	Cortex	1.43495
AT1G07985	OG0007788	Cortex	1.42939
AT1G06640	OG0000037	Cortex	1.42295
AT3G12610	OG0004717	Cortex	1.42294
AT2G42570	OG0001348	Cortex	1.41711
AT5G11420	OG0001729	Cortex	1.41448
AT5G60660	OG0000292	Cortex	1.41207
AT2G43535	OG0005835	Cortex	1.40282
AT5G19340	OG0011885	Cortex	1.39609
AT3G28740	OG0000135	Cortex	1.37105
AT3G15356	OG0005469	Cortex	1.3526
AT1G11670	OG0017870	Cortex	1.34862
AT2G34070	OG0001348	Cortex	1.34682
AT2G47460	OG0018104	Cortex	1.34679
AT5G08640	OG0002056	Cortex	1.31732
AT3G18830	OG0006369	Cortex	1.31693
AT5G25460	OG0001729	Cortex	1.31646
AT4G00430	OG0000416	Cortex	1.30684
AT3G61430	OG0000416	Cortex	1.30363
AT3G13790	OG0010807	Cortex	1.29783
AT3G17020	OG0008535	Cortex	1.29578
AT5G26340	OG0012819	Cortex	1.28647
AT3G50640	OG0001164	Cortex	1.26266
AT5G04120	OG0008533	Cortex	1.24467
AT2G22170	OG0002525	Cortex	1.24055
AT5G44380	OG0011400	Cortex	1.23699
AT5G63450	OG0003514	Cortex	1.22405
AT1G78570	OG0003029	Cortex	1.19418
AT1G05575	OG0001042	Cortex	1.18305
AT1G14960	OG0000678	Cortex	1.17891
AT4G24220	OG0001212	Cortex	1.17532
AT3G14850	OG0014929	Cortex	1.16849
AT1G76670	OG0003966	Cortex	1.16585
AT5G64620	OG0002810	Cortex	1.165
AT1G62660	OG0003010	Cortex	1.15939
AT5G48010	OG0004267	Cortex	1.1486
AT1G59870	OG0001695	Cortex	1.14177
AT1G22440	OG0007691	Cortex	1.13624
AT5G16010	OG0003695	Cortex	1.12487
AT5G07860	OG0002769	Cortex	1.11543
AT2G47600	OG0008197	Cortex	1.10652
AT3G53420	OG0000292	Cortex	1.10517
AT4G12730	OG0000952	Cortex	1.09704
AT3G23810	OG0006218	Cortex	1.09697
AT1G08930	OG0002302	Cortex	1.09563
AT5G49360	OG0004276	Cortex	1.09533
AT5G19250	OG0003416	Cortex	1.08365
AT4G32460	OG0001729	Cortex	1.07612
AT2G29750	OG0001026	Cortex	1.07197
AT5G02270	OG0013293	Cortex	1.06769
AT1G17300	OG0014482	Cortex	1.06173
AT2G37170	OG0000292	Cortex	1.05938
AT1G76640	OG0000871	Cortex	1.0546
AT3G07460	OG0003546	Cortex	1.0513
AT1G75680	OG0005692	Cortex	1.04861
AT1G76650	OG0000871	Cortex	1.04655
AT1G05850	OG0004330	Cortex	1.04504
AT5G43060	OG0001064	Cortex	1.04408
AT1G55360	OG0001075	Cortex	1.03549
AT3G07010	OG0000589	Cortex	1.03476
AT1G50010	OG0000254	Cortex	1.03223
AT3G20390	OG0011901	Cortex	1.03155
AT5G27450	OG0002771	Cortex	1.02731
AT2G25810	OG0011518	Cortex	1.02272
AT5G09440	OG0005115	Cortex	1.01777
AT3G09940	OG0004664	Cortex	1.01707
AT5G49280	OG0008874	Cortex	1.00994
AT3G57020	OG0000495	Cortex	1.00384
AT1G76790	OG0000810	Cortex	1.00162
AT1G76160	OG0000361	Cortex	0.995236
AT1G15210	OG0001695	Cortex	0.99113
AT5G49720	OG0006686	Cortex	0.990449
AT1G22740	OG0004068	Cortex	0.986192
AT4G33150	OG0009251	Cortex	0.986055
AT5G47770	OG0006722	Cortex	0.981677
AT4G32410	OG0003314	Cortex	0.967267
AT3G12700	OG0001943	Cortex	0.961431
AT1G76240	OG0001333	Cortex	0.960262
AT2G34500	OG0001887	Cortex	0.95935
AT5G19230	OG0003416	Cortex	0.953029
AT5G05170	OG0009751	Cortex	0.948534
AT3G25760	OG0002232	Cortex	0.944182
AT3G17390	OG0000723	Cortex	0.939451
AT4G04830	OG0006698	Cortex	0.932438
AT1G76490	OG0002404	Cortex	0.932204
AT5G07460	OG0002729	Cortex	0.931539
AT1G05680	OG0011208	Cortex	0.931407
AT3G25290	OG0000774	Cortex	0.93022
AT5G14360	OG0006955	Cortex	0.922925
AT5G05270	OG0009752	Cortex	0.921346
AT1G04820	OG0000254	Cortex	0.919559
AT3G14260	OG0000563	Cortex	0.919456
AT1G78830	OG0003129	Cortex	0.913552
AT5G40890	OG0012171	Cortex	0.913428
AT3G57520	OG0011969	Cortex	0.910974
AT3G05910	OG0008634	Cortex	0.910188
AT2G46930	OG0008130	Cortex	0.906854
AT5G15150	OG0012165	Cortex	0.903668
AT5G44110	OG0011109	Cortex	0.902599
AT3G29350	OG0000560	Cortex	0.902063
AT5G40450	OG0013259	Cortex	0.894131
AT2G35880	OG0011579	Cortex	0.888787
AT3G12120	OG0000931	Cortex	0.875242
AT5G65870	OG0000716	Cortex	0.874928
AT1G16850	OG0017928	Cortex	0.873784
AT3G48520	OG0003514	Cortex	0.870276
AT3G16240	OG0000929	Cortex	0.864429
AT4G24110	OG0018573	Cortex	0.864353
AT1G77330	OG0002210	Cortex	0.858863
AT4G25100	OG0002725	Cortex	0.858681
AT5G53370	OG0006307	Cortex	0.856909
AT1G08200	OG0004182	Cortex	0.854559
AT1G74500	OG0017791	Cortex	0.849718
AT5G60920	OG0000764	Cortex	0.846921
AT1G30690	OG0007892	Cortex	0.845901
AT1G53180	OG0014517	Cortex	0.835645
AT5G13750	OG0000965	Cortex	0.832571
AT1G12240	OG0003010	Cortex	0.829087
AT1G14290	OG0001766	Cortex	0.826528
AT3G24420	OG0012143	Cortex	0.825531
AT3G47960	OG0001366	Cortex	0.825252
AT2G27000	OG0000176	Cortex	0.820459
AT3G26590	OG0000686	Cortex	0.818851
AT4G36500	OG0008168	Cortex	0.817888
AT2G26690	OG0008185	Cortex	0.817737
AT4G35060	OG0006631	Cortex	0.817484
AT5G36180	OG0000098	Cortex	0.817438
AT4G25260	OG0000480	Cortex	0.816376
AT1G78040	OG0002320	Cortex	0.815517
AT1G47128	OG0001064	Cortex	0.814634
AT3G45070	OG0000049	Cortex	0.813794
AT5G24165	OG0004924	Cortex	0.813006
AT5G67480	OG0015032	Cortex	0.810965
AT4G22010	OG0000361	Cortex	0.806262
AT1G08500	OG0010934	Cortex	0.797925
AT1G04250	OG0000838	Cortex	0.797786
AT5G28020	OG0014968	Cortex	0.791842
AT4G34260	OG0009144	Cortex	0.782843
AT4G17340	OG0000929	Cortex	0.78278
AT3G09260	OG0001305	Cortex	0.781372
AT4G37010	OG0008577	Cortex	0.780949
AT1G65840	OG0002959	Cortex	0.779065
AT2G37640	OG0001441	Cortex	0.778207
AT1G28190	OG0011207	Cortex	0.77739
AT1G06700	OG0001409	Cortex	0.776998
AT1G01620	OG0000416	Cortex	0.776796
AT5G23830	OG0004134	Cortex	0.776649
AT1G01630	OG0001390	Cortex	0.776363
AT2G02780	OG0007818	Cortex	0.77635
AT4G25830	OG0004908	Cortex	0.775234
AT5G44020	OG0014670	Cortex	0.773944
AT5G47450	OG0000929	Cortex	0.770332
AT3G29035	OG0000378	Cortex	0.770127
AT5G26660	OG0009445	Cortex	0.769547
AT2G41660	OG0014791	Cortex	0.76941
AT3G61440	OG0006375	Cortex	0.768538
AT2G06925	OG0008136	Cortex	0.768483
AT1G12080	OG0017964	Stele2	3.15497
AT2G13820	OG0000893	Stele2	2.63506
AT1G77690	OG0000316	Stele2	2.56335
AT1G14890	OG0014444	Stele2	2.33201
AT1G64660	OG0005623	Stele2	2.27567
AT2G46890	OG0008127	Stele2	2.22359
AT1G72150	OG0017739	Stele2	2.0925
AT4G14130	OG0014989	Stele2	2.01186
AT1G22710	OG0003003	Stele2	2.00935
AT4G05120	OG0000711	Stele2	1.97717
AT3G16330	OG0001768	Stele2	1.97245
AT1G66230	OG0000321	Stele2	1.95953
AT1G63180	OG0005443	Stele2	1.91121
AT2G34140	OG0001405	Stele2	1.90357
AT1G62480	OG0017964	Stele2	1.88683
AT4G11210	OG0001069	Stele2	1.83455
AT1G72230	OG0001379	Stele2	1.83404
AT2G45470	OG0008241	Stele2	1.76909
AT3G28600	OG0011961	Stele2	1.7652
AT1G25530	OG0017915	Stele2	1.7527
AT1G66200	OG0000500	Stele2	1.74619
AT5G46700	OG0013013	Stele2	1.72513
AT2G29640	OG0011534	Stele2	1.71616
AT2G40480	OG0018086	Stele2	1.70354
AT2G37040	OG0000756	Stele2	1.7028
AT1G71880	OG0003003	Stele2	1.68492
AT2G30520	OG0005929	Stele2	1.68032
AT3G14990	OG0005506	Stele2	1.67764
AT5G05690	OG0006984	Stele2	1.67736
AT1G76410	OG0000409	Stele2	1.66737
AT3G25780	OG0002232	Stele2	1.65963
AT1G66600	OG0005703	Stele2	1.6426
AT5G03610	OG0004598	Stele2	1.63511
AT1G66050	OG0000567	Stele2	1.62824
AT2G31345	OG0007944	Stele2	1.61916
AT3G49690	OG0001501	Stele2	1.60541
AT4G22212	OG0006544	Stele2	1.60044
AT1G55330	OG0005714	Stele2	1.59824
AT3G25770	OG0002232	Stele2	1.57638
AT5G62350	OG0000480	Stele2	1.56452
AT3G43430	OG0018368	Stele2	1.56289
AT1G75750	OG0014615	Stele2	1.55003
AT3G11930	OG0008854	Stele2	1.54192
AT2G30490	OG0011638	Stele2	1.54188
AT5G57560	OG0002731	Stele2	1.5406
AT1G11580	OG0004056	Stele2	1.53144
AT2G33830	OG0003237	Stele2	1.51009
AT5G17920	OG0001499	Stele2	1.49561
AT1G61660	OG0003110	Stele2	1.48902
AT5G65870	OG0000716	Stele2	1.46828
AT2G30400	OG0001334	Stele2	1.45515
AT2G26380	OG0003075	Stele2	1.44438
AT3G13650	OG0007716	Stele2	1.44212
AT5G57685	OG0002732	Stele2	1.43795
AT5G21105	OG0006934	Stele2	1.43233
AT1G65960	OG0000258	Stele2	1.42676
AT4G31820	OG0009086	Stele2	1.42155
AT5G54145	OG0012480	Stele2	1.41663
AT1G32100	OG0000843	Stele2	1.41461
AT3G09440	OG0000132	Stele2	1.4104
AT3G03780	OG0001499	Stele2	1.40957
AT1G80120	OG0004077	Stele2	1.38827
AT4G21960	OG0018576	Stele2	1.37937
AT1G20823	OG0000409	Stele2	1.36609
AT3G52920	OG0001148	Stele2	1.36093
AT5G53250	OG0000514	Stele2	1.35157
AT3G61850	OG0008480	Stele2	1.32734
AT3G51670	OG0006233	Stele2	1.32216
AT2G22860	OG0000716	Stele2	1.31672
AT5G19875	OG0008129	Stele2	1.30907
AT4G28290	OG0009046	Stele2	1.3001
AT4G37730	OG0011412	Stele2	1.29754
AT1G70130	OG0001770	Stele2	1.29722
AT5G63160	OG0004738	Stele2	1.2955
AT2G46150	OG0005691	Stele2	1.29224
AT1G20440	OG0014469	Stele2	1.2908
AT5G62070	OG0018625	Stele2	1.28809
AT2G30395	OG0005843	Stele2	1.28761
AT4G36710	OG0018516	Stele2	1.28656
AT1G02400	OG0002979	Stele2	1.27979
AT1G62380	OG0018003	Stele2	1.27916
AT4G18170	OG0018495	Stele2	1.26805
AT3G12110	OG0000071	Stele2	1.2633
AT1G71050	OG0002321	Stele2	1.26189
AT4G22570	OG0002277	Stele2	1.25977
AT5G53120	OG0007010	Stele2	1.2559
AT3G25597	OG0004252	Stele2	1.25211
AT5G16010	OG0003695	Stele2	1.24574
AT1G58340	OG0011074	Stele2	1.23277
AT3G49780	OG0000716	Stele2	1.22755
AT4G01250	OG0002721	Stele2	1.22313
AT2G28650	OG0014604	Stele2	1.21084
AT3G57450	OG0008727	Stele2	1.20904
AT4G34050	OG0003618	Stele2	1.20408
AT3G02910	OG0006331	Stele2	1.20144
AT1G64720	OG0004199	Stele2	1.1971
AT2G40820	OG0003252	Stele2	1.19621
AT5G03960	OG0005792	Stele2	1.19434
AT1G52190	OG0002373	Stele2	1.18297
AT1G21830	OG0002992	Stele2	1.18192
AT3G05900	OG0014923	Stele2	1.17704
AT4G33930	OG0018520	Stele2	1.17669
AT1G69080	OG0002980	Stele2	1.17183
AT2G28660	OG0001882	Stele2	1.16598
AT2G26400	OG0002521	Stele2	1.16596
AT2G43120	OG0003335	Stele2	1.15581
AT2G41010	OG0002468	Stele2	1.15473
AT5G11670	OG0000252	Stele2	1.15304
AT4G39640	OG0005626	Stele2	1.15196
AT3G55420	OG0006416	Stele2	1.15037
AT4G18510	OG0017720	Stele2	1.14625
AT1G12440	OG0011178	Stele2	1.14141
AT1G77020	OG0010789	Stele2	1.13751
AT5G09810	OG0000071	Stele2	1.13496
AT3G15450	OG0003497	Stele2	1.13242
AT5G46590	OG0003198	Stele2	1.12497
AT1G75500	OG0010945	Stele2	1.11862
AT1G80690	OG0014627	Stele2	1.11615
AT5G43700	OG0000837	Stele2	1.11102
AT4G13940	OG0006218	Stele2	1.1033
AT4G34230	OG0009119	Stele2	1.09282
AT5G61890	OG0009387	Stele2	1.09254
AT4G39800	OG0001880	Stele2	1.09188
AT5G12010	OG0015137	Stele2	1.09134
AT1G01470	OG0001076	Stele2	1.09007
AT1G07570	OG0018041	Stele2	1.08852
AT2G43910	OG0018096	Stele2	1.08048
AT5G15960	OG0018712	Stele2	1.07391
AT2G43680	OG0006150	Stele2	1.06467
AT5G02440	OG0018662	Stele2	1.06219
AT4G24060	OG0001060	Stele2	1.05819
AT1G22530	OG0017739	Stele2	1.04511
AT3G03341	OG0012213	Stele2	1.04146
AT5G02380	OG0004805	Stele2	1.03781
AT3G09820	OG0002674	Stele2	1.03611
AT4G15340	OG0004267	Stele2	1.03532
AT5G24760	OG0006922	Stele2	1.02688
AT5G40390	OG0006773	Stele2	1.02219
AT1G52890	OG0017876	Stele2	1.02159
AT4G39090	OG0002564	Stele2	1.00857
AT1G08800	OG0000555	Stele2	1.00636
AT4G13930	OG0006607	Stele2	1.00335
AT2G22850	OG0011412	Stele2	1.00035
AT3G57050	OG0008813	Stele2	1.00003
AT4G38580	OG0006631	Stele2	0.992265
AT5G46710	OG0002429	Stele2	0.991724
AT1G10370	OG0001082	Stele2	0.991677
AT3G29670	OG0001522	Stele2	0.986532
AT4G25700	OG0002734	Stele2	0.976899
AT3G10340	OG0018306	Stele2	0.975913
AT1G01620	OG0000416	Stele2	0.975586
AT5G65670	OG0018624	Stele2	0.973454
AT4G36360	OG0006627	Stele2	0.971927
AT3G49760	OG0011412	Stele2	0.968761
AT2G32240	OG0003108	Stele2	0.96815
AT4G02590	OG0001735	Stele2	0.961779
AT5G01380	OG0001435	Stele2	0.95908
AT5G01340	OG0012844	Stele2	0.954392
AT2G29460	OG0004518	Stele2	0.953878
AT3G55370	OG0000886	Stele2	0.952908
AT1G64740	OG0000254	Stele2	0.947548
AT1G15430	OG0010766	Stele2	0.944659
AT1G30135	OG0001383	Stele2	0.944415
AT1G76180	OG0014469	Stele2	0.942765
AT3G06720	OG0000684	Stele2	0.941686
AT5G57770	OG0009540	Stele2	0.938017
AT4G27450	OG0003497	Stele2	0.931807
AT4G12080	OG0003593	Stele2	0.930817
AT2G45290	OG0003325	Stele2	0.925721
AT2G46370	OG0000107	Stele2	0.919863
AT4G35480	OG0000409	Stele2	0.918526
AT1G60940	OG0000690	Stele2	0.916964
AT1G33470	OG0007845	Stele2	0.915469
AT3G59350	OG0001409	Stele2	0.915158
AT2G25070	OG0003286	Stele2	0.914888
AT3G52360	OG0004534	Stele2	0.911912
AT5G52870	OG0006774	Stele2	0.911597
AT5G60200	OG0000571	Stele2	0.910086
AT5G10410	OG0004868	Stele2	0.908779
AT5G17760	OG0006182	Stele2	0.907131
AT4G37850	OG0001925	Stele2	0.905116
AT2G44300	OG0003385	Stele2	0.902586
AT1G20450	OG0014469	Stele2	0.901552
AT3G23170	OG0007582	Stele2	0.901098
AT1G60710	OG0001008	Stele2	0.900209
AT2G41130	OG0008085	Stele2	0.899798
AT1G73165	OG0017720	Stele2	0.898835
AT3G60490	OG0018069	Stele2	0.897209
AT4G01410	OG0015081	Stele2	0.893311
AT2G16060	OG0004470	Stele2	0.891408
AT5G19440	OG0004148	Stele2	0.886093
AT2G17120	OG0011422	Stele2	0.883715
AT2G36410	OG0001148	Stele2	0.869798
AT1G79760	OG0010785	Stele2	0.862842
AT2G38310	OG0000508	Stele2	0.862393
AT5G11070	OG0002532	Stele2	0.859572
AT1G70700	OG0005457	Stele2	0.854741
AT5G19190	OG0008530	Stele2	0.854598
AT4G14010	OG0018521	Stele2	0.853961
AT5G09800	OG0001177	Stele2	0.853621
AT2G33790	OG0000418	Atrichoblast2	3.01401
AT4G38740	OG0001113	Atrichoblast2	2.20217
AT4G19030	OG0002542	Atrichoblast2	2.15616
AT5G16130	OG0018360	Atrichoblast2	2.02578
AT2G21660	OG0001140	Atrichoblast2	1.99847
AT1G27400	OG0004105	Atrichoblast2	1.91695
AT2G37190	OG0000905	Atrichoblast2	1.91572
AT2G18020	OG0002512	Atrichoblast2	1.91187
AT2G32060	OG0001301	Atrichoblast2	1.90961
AT5G02960	OG0001173	Atrichoblast2	1.89424
AT3G60245	OG0003476	Atrichoblast2	1.89344
AT5G27850	OG0002614	Atrichoblast2	1.84773
AT2G27710	OG0000377	Atrichoblast2	1.84768
AT3G62870	OG0001454	Atrichoblast2	1.84647
AT5G22440	OG0001759	Atrichoblast2	1.84088
AT1G09690	OG0001290	Atrichoblast2	1.82788
AT3G07110	OG0002612	Atrichoblast2	1.8274
AT5G45775	OG0000746	Atrichoblast2	1.82218
AT1G15930	OG0001301	Atrichoblast2	1.82081
AT4G16720	OG0001567	Atrichoblast2	1.79937
AT1G54000	OG0005544	Atrichoblast2	1.78758
AT4G34670	OG0000932	Atrichoblast2	1.77464
AT3G16080	OG0001806	Atrichoblast2	1.77336
AT3G62250	OG0002288	Atrichoblast2	1.76801
AT5G57290	OG0003646	Atrichoblast2	1.76305
AT5G15200	OG0002811	Atrichoblast2	1.74839
AT5G18380	OG0001485	Atrichoblast2	1.74305
AT4G27090	OG0002550	Atrichoblast2	1.73851
AT3G22230	OG0001982	Atrichoblast2	1.73729
AT4G22230	OG0006544	Atrichoblast2	1.73624
AT5G56710	OG0003373	Atrichoblast2	1.73185
AT2G34480	OG0001732	Atrichoblast2	1.72931
AT3G53740	OG0002462	Atrichoblast2	1.72891
AT1G77940	OG0001745	Atrichoblast2	1.72846
AT5G39740	OG0002658	Atrichoblast2	1.72484
AT2G45050	OG0004489	Atrichoblast2	1.7169
AT2G16600	OG0001113	Atrichoblast2	1.70563
AT4G13850	OG0002605	Atrichoblast2	1.70119
AT2G39460	OG0001863	Atrichoblast2	1.70063
AT1G70600	OG0004023	Atrichoblast2	1.69941
AT1G28290	OG0000418	Atrichoblast2	1.69806
AT2G41840	OG0001045	Atrichoblast2	1.69372
AT1G67430	OG0004105	Atrichoblast2	1.69011
AT5G60670	OG0000905	Atrichoblast2	1.68602
AT2G01250	OG0000924	Atrichoblast2	1.67928
AT2G21580	OG0003344	Atrichoblast2	1.6693
AT2G19730	OG0006112	Atrichoblast2	1.66531
AT3G55280	OG0001863	Atrichoblast2	1.66455
AT4G15000	OG0001982	Atrichoblast2	1.64659
AT3G09200	OG0001127	Atrichoblast2	1.64361
AT4G00100	OG0001954	Atrichoblast2	1.64322
AT1G08360	OG0001759	Atrichoblast2	1.63642
AT2G36620	OG0003358	Atrichoblast2	1.63412
AT3G45030	OG0003432	Atrichoblast2	1.61643
AT5G58420	OG0002485	Atrichoblast2	1.61405
AT3G49010	OG0002643	Atrichoblast2	1.61054
AT5G41520	OG0001208	Atrichoblast2	1.60523
AT3G04920	OG0000627	Atrichoblast2	1.6044
AT4G22235	OG0006544	Atrichoblast2	1.59964
AT3G09500	OG0002539	Atrichoblast2	1.5965
AT1G41880	OG0001017	Atrichoblast2	1.59501
AT1G22780	OG0001342	Atrichoblast2	1.58856
AT3G04400	OG0000832	Atrichoblast2	1.58023
AT3G09260	OG0001305	Atrichoblast2	1.57601
AT5G23740	OG0000930	Atrichoblast2	1.57591
AT1G48630	OG0001423	Atrichoblast2	1.57196
AT3G02080	OG0002679	Atrichoblast2	1.56866
AT3G08030	OG0006291	Atrichoblast2	1.56587
AT3G23390	OG0001185	Atrichoblast2	1.56497
AT2G47610	OG0001454	Atrichoblast2	1.56273
AT1G72370	OG0001378	Atrichoblast2	1.55832
AT2G36160	OG0002565	Atrichoblast2	1.55494
AT3G04840	OG0000932	Atrichoblast2	1.55392
AT5G61170	OG0002679	Atrichoblast2	1.55223
AT4G18730	OG0000746	Atrichoblast2	1.55009
AT4G34870	OG0001113	Atrichoblast2	1.54999
AT1G43170	OG0001061	Atrichoblast2	1.54954
AT2G44120	OG0000924	Atrichoblast2	1.5415
AT3G11940	OG0003292	Atrichoblast2	1.53458
AT3G14600	OG0001732	Atrichoblast2	1.53187
AT3G24830	OG0002612	Atrichoblast2	1.52266
AT3G55750	OG0001017	Atrichoblast2	1.52127
AT1G57660	OG0001290	Atrichoblast2	1.52023
AT3G60770	OG0001954	Atrichoblast2	1.51711
AT1G09590	OG0001290	Atrichoblast2	1.51701
AT5G59850	OG0001792	Atrichoblast2	1.50948
AT3G05560	OG0002622	Atrichoblast2	1.50612
AT2G27720	OG0000377	Atrichoblast2	1.50432
AT5G07090	OG0002485	Atrichoblast2	1.49987
AT3G25520	OG0002658	Atrichoblast2	1.49875
AT3G56340	OG0002481	Atrichoblast2	1.49534
AT5G47700	OG0014637	Atrichoblast2	1.48785
AT4G17390	OG0001567	Atrichoblast2	1.48766
AT4G10450	OG0000591	Atrichoblast2	1.48585
AT4G39200	OG0003344	Atrichoblast2	1.48183
AT3G11510	OG0002565	Atrichoblast2	1.4728
AT5G09510	OG0001335	Atrichoblast2	1.4706
AT3G53020	OG0003358	Atrichoblast2	1.46959
AT1G01100	OG0014637	Atrichoblast2	1.46673
AT3G05020	OG0000413	Atrichoblast2	1.46556
AT3G61110	OG0006226	Atrichoblast2	1.46487
AT1G18540	OG0001374	Atrichoblast2	1.45582
AT5G02450	OG0002462	Atrichoblast2	1.45401
AT1G33120	OG0000591	Atrichoblast2	1.44806
AT2G43460	OG0006060	Atrichoblast2	1.44464
AT4G36130	OG0002512	Atrichoblast2	1.44166
AT2G41800	OG0011432	Atrichoblast2	1.44054
AT3G49910	OG0002631	Atrichoblast2	1.44043
AT2G37270	OG0003292	Atrichoblast2	1.43719
AT3G02560	OG0018360	Atrichoblast2	1.42538
AT4G18100	OG0003604	Atrichoblast2	1.42424
AT1G54580	OG0000413	Atrichoblast2	1.42408
AT3G59540	OG0006060	Atrichoblast2	1.42325
AT1G52300	OG0001806	Atrichoblast2	1.4162
AT5G28060	OG0000627	Atrichoblast2	1.41591
AT5G27700	OG0001158	Atrichoblast2	1.40895
AT3G05590	OG0002614	Atrichoblast2	1.40866
AT3G48930	OG0000930	Atrichoblast2	1.40532
AT3G15950	OG0014709	Atrichoblast2	1.40424
AT4G15910	OG0012473	Atrichoblast2	1.40135
AT1G74500	OG0017791	Atrichoblast2	1.39702
AT1G30230	OG0004358	Atrichoblast2	1.39569
AT5G35940	OG0000083	Atrichoblast2	1.38331
AT3G52590	OG0003390	Atrichoblast2	1.38152
AT2G47110	OG0002288	Atrichoblast2	1.38083
AT1G69620	OG0001328	Atrichoblast2	1.37778
AT5G64140	OG0004675	Atrichoblast2	1.37747
AT1G02780	OG0001717	Atrichoblast2	1.37261
AT1G04270	OG0001335	Atrichoblast2	1.3657
AT3G20370	OG0000112	Atrichoblast2	1.3595
AT5G26260	OG0000112	Atrichoblast2	1.35248
AT3G06700	OG0003540	Atrichoblast2	1.34902
AT5G52650	OG0001208	Atrichoblast2	1.34639
AT5G27770	OG0002622	Atrichoblast2	1.34489
AT2G27530	OG0001759	Atrichoblast2	1.34262
AT1G33140	OG0000591	Atrichoblast2	1.34152
AT5G03850	OG0004675	Atrichoblast2	1.34095
AT3G28900	OG0001328	Atrichoblast2	1.34075
AT5G59690	OG0000056	Atrichoblast2	1.32897
AT5G14750	OG0015004	Atrichoblast2	1.32823
AT4G29410	OG0006112	Atrichoblast2	1.32781
AT2G05220	OG0001913	Atrichoblast2	1.32744
AT5G40330	OG0015004	Atrichoblast2	1.31857
AT5G19510	OG0009419	Atrichoblast2	1.30797
AT3G53870	OG0001445	Atrichoblast2	1.30747
AT5G04800	OG0001913	Atrichoblast2	1.30233
AT1G14320	OG0003020	Atrichoblast2	1.29195
AT4G12880	OG0005920	Atrichoblast2	1.28849
AT2G09990	OG0001485	Atrichoblast2	1.28835
AT3G16420	OG0000083	Atrichoblast2	1.28717
AT5G47210	OG0018542	Atrichoblast2	1.28704
AT1G56045	OG0005539	Atrichoblast2	1.28056
AT3G56020	OG0005539	Atrichoblast2	1.27998
AT4G00810	OG0014637	Atrichoblast2	1.27663
AT5G35530	OG0001445	Atrichoblast2	1.26648
AT1G66270	OG0001305	Atrichoblast2	1.26464
AT2G42570	OG0001348	Atrichoblast2	1.26253
AT1G34030	OG0001342	Atrichoblast2	1.25387
AT3G19200	OG0014897	Atrichoblast2	1.24929
AT5G62300	OG0003432	Atrichoblast2	1.23863
AT3G18740	OG0001745	Atrichoblast2	1.23482
AT2G33370	OG0000832	Atrichoblast2	1.23292
AT1G66280	OG0001305	Atrichoblast2	1.22592
AT3G58700	OG0000746	Atrichoblast2	1.22574
AT5G60390	OG0000174	Atrichoblast2	1.22091
AT4G25740	OG0001208	Atrichoblast2	1.21894
AT1G23290	OG0004023	Atrichoblast2	1.21741
AT1G21750	OG0001671	Atrichoblast2	1.21701
AT3G47370	OG0003432	Atrichoblast2	1.21127
AT2G19750	OG0001912	Atrichoblast2	1.20097
AT4G26230	OG0003373	Atrichoblast2	1.19881
AT3G12120	OG0000931	Atrichoblast2	1.18
AT4G03190	OG0006228	Atrichoblast2	1.17975
AT2G17360	OG0002485	Atrichoblast2	1.1791
AT4G10480	OG0017971	Atrichoblast2	1.17336
AT5G02870	OG0001531	Atrichoblast2	1.17148
AT2G31610	OG0001445	Atrichoblast2	1.16758
AT4G29390	OG0001912	Atrichoblast2	1.16725
AT4G09800	OG0001342	Atrichoblast2	1.15858
AT3G28910	OG0000160	Atrichoblast2	1.15375
AT3G53890	OG0001158	Atrichoblast2	1.15117
AT2G19740	OG0003373	Atrichoblast2	1.14906
AT4G21960	OG0018576	Atrichoblast2	1.1474
AT2G40590	OG0002481	Atrichoblast2	1.1463
AT1G54690	OG0002315	Atrichoblast2	1.14373
AT1G07770	OG0001792	Atrichoblast2	1.14015
AT1G57860	OG0001290	Atrichoblast2	1.13814
AT4G31700	OG0003610	Atrichoblast2	1.13795
AT3G19820	OG0008904	Atrichoblast2	1.13607
AT1G65980	OG0005364	Atrichoblast2	1.13471
AT3G53430	OG0000905	Atrichoblast2	1.13087
AT1G54630	OG0000413	Atrichoblast2	1.12995
AT5G52470	OG0003640	Atrichoblast2	1.12364
AT2G25980	OG0000083	Atrichoblast2	1.11946
AT1G13590	OG0000716	Atrichoblast2	1.11884
AT5G15230	OG0000370	Atrichoblast2	1.11855
AT5G06860	OG0001168	Atrichoblast2	1.11598
AT5G19340	OG0011885	Atrichoblast2	1.11026
AT3G46040	OG0001792	Atrichoblast2	1.10714
AT5G22650	OG0001993	Atrichoblast2	1.10419
AT2G36100	OG0006036	Endodermis	6.13185
AT2G28670	OG0003143	Endodermis	5.39872
AT5G42180	OG0001585	Endodermis	4.68871
AT2G40113	OG0003312	Endodermis	4.55392
AT3G55230	OG0005923	Endodermis	4.38173
AT5G66390	OG0015206	Endodermis	4.28698
AT3G11550	OG0006036	Endodermis	4.22185
AT5G15290	OG0005119	Endodermis	3.93329
AT3G24020	OG0004727	Endodermis	3.92733
AT4G13580	OG0004727	Endodermis	3.57365
AT1G61590	OG0005634	Endodermis	3.49997
AT4G17215	OG0003312	Endodermis	3.21283
AT3G22620	OG0001760	Endodermis	3.01448
AT2G27370	OG0006036	Endodermis	2.99664
AT5G65530	OG0002788	Endodermis	2.92734
AT2G34310	OG0014503	Endodermis	2.8374
AT4G19880	OG0000301	Endodermis	2.68926
AT5G66400	OG0002678	Endodermis	2.62625
AT2G30210	OG0008354	Endodermis	2.5713
AT1G06640	OG0000037	Endodermis	2.5082
AT1G71740	OG0014700	Endodermis	2.47725
AT4G22610	OG0012256	Endodermis	2.46067
AT2G28305	OG0000428	Endodermis	2.33569
AT4G08770	OG0004523	Endodermis	2.3029
AT4G02090	OG0009307	Endodermis	2.29709
AT1G18100	OG0004126	Endodermis	2.2651
AT3G22600	OG0000426	Endodermis	2.16199
AT3G21710	OG0004832	Endodermis	2.16068
AT3G32980	OG0004523	Endodermis	2.13529
AT1G03920	OG0001092	Endodermis	2.11393
AT1G02500	OG0000723	Endodermis	2.04592
AT2G47630	OG0005959	Endodermis	1.95654
AT2G39430	OG0005923	Endodermis	1.88733
AT5G06760	OG0002088	Endodermis	1.88384
AT2G46680	OG0003387	Endodermis	1.88163
AT5G42030	OG0003428	Endodermis	1.86697
AT1G44970	OG0007683	Endodermis	1.84407
AT5G65020	OG0001765	Endodermis	1.83994
AT5G48930	OG0006813	Endodermis	1.8341
AT3G09270	OG0000115	Endodermis	1.80338
AT5G39580	OG0015166	Endodermis	1.78202
AT2G38800	OG0001133	Endodermis	1.76082
AT1G23800	OG0002279	Endodermis	1.75909
AT2G40060	OG0001129	Endodermis	1.75829
AT3G22240	OG0001354	Endodermis	1.75561
AT5G42500	OG0007464	Endodermis	1.75085
AT1G68500	OG0014678	Endodermis	1.69481
AT1G60010	OG0000407	Endodermis	1.6846
AT4G34710	OG0003388	Endodermis	1.66199
AT5G58375	OG0003686	Endodermis	1.64955
AT5G23920	OG0006825	Endodermis	1.62943
AT4G19160	OG0015060	Endodermis	1.62379
AT5G18680	OG0018399	Endodermis	1.60332
AT1G49580	OG0001313	Endodermis	1.60143
AT4G25680	OG0009179	Endodermis	1.59653
AT2G34590	OG0004237	Endodermis	1.57487
AT2G32720	OG0000759	Endodermis	1.56757
AT3G20510	OG0005525	Endodermis	1.54567
AT5G36160	OG0004985	Endodermis	1.53187
AT3G53260	OG0000756	Endodermis	1.5269
AT4G29930	OG0004960	Endodermis	1.51951
AT3G49780	OG0000716	Endodermis	1.50956
AT1G78660	OG0002367	Endodermis	1.50634
AT1G02900	OG0002297	Endodermis	1.4995
AT3G61890	OG0003387	Endodermis	1.48854
AT1G65690	OG0000819	Endodermis	1.48446
AT3G14280	OG0001938	Endodermis	1.4841
AT3G48520	OG0003514	Endodermis	1.47872
AT5G21090	OG0008936	Endodermis	1.4733
AT1G21980	OG0003995	Endodermis	1.43986
AT3G13520	OG0005714	Endodermis	1.43334
AT1G60710	OG0001008	Endodermis	1.43274
AT4G22530	OG0001104	Endodermis	1.43156
AT4G05100	OG0012248	Endodermis	1.42996
AT2G44160	OG0006084	Endodermis	1.42723
AT1G20450	OG0014469	Endodermis	1.42722
AT5G19590	OG0012774	Endodermis	1.41939
AT3G25770	OG0002232	Endodermis	1.41932
AT5G04120	OG0008533	Endodermis	1.41718
AT1G14860	OG0001299	Endodermis	1.40245
AT3G01513	OG0018328	Endodermis	1.38068
AT5G67600	OG0001354	Endodermis	1.35888
AT4G15330	OG0000176	Endodermis	1.35691
AT2G02710	OG0006152	Endodermis	1.3558
AT2G38240	OG0000888	Endodermis	1.35497
AT3G59710	OG0006254	Endodermis	1.3498
AT4G10380	OG0012468	Endodermis	1.34863
AT2G01670	OG0001299	Endodermis	1.34446
AT1G27760	OG0001774	Endodermis	1.34307
AT1G77120	OG0005558	Endodermis	1.34097
AT1G23040	OG0014455	Endodermis	1.33745
AT4G13660	OG0000843	Endodermis	1.32866
AT3G60690	OG0001889	Endodermis	1.32778
AT1G13245	OG0000477	Endodermis	1.32043
AT4G01070	OG0002372	Endodermis	1.31107
AT4G34050	OG0003618	Endodermis	1.30772
AT1G62975	OG0002407	Endodermis	1.30548
AT4G30960	OG0000951	Endodermis	1.30391
AT3G60450	OG0006333	Endodermis	1.30168
AT2G43535	OG0005835	Endodermis	1.29925
AT2G28510	OG0000571	Endodermis	1.29838
AT1G16510	OG0001714	Endodermis	1.29826
AT5G28646	OG0001155	Endodermis	1.29635
AT3G14440	OG0000862	Endodermis	1.29624
AT5G25280	OG0002790	Endodermis	1.29613
AT3G52230	OG0011778	Endodermis	1.29301
AT1G61820	OG0000494	Endodermis	1.29251
AT1G50740	OG0005525	Endodermis	1.27784
AT3G56310	OG0004831	Endodermis	1.27015
AT1G65720	OG0003975	Endodermis	1.26247
AT1G23440	OG0018007	Endodermis	1.25495
AT5G63590	OG0002056	Endodermis	1.25117
AT1G62990	OG0004303	Endodermis	1.25067
AT3G11340	OG0000624	Endodermis	1.24628
AT2G36310	OG0006141	Endodermis	1.24507
AT4G24960	OG0001195	Endodermis	1.24457
AT1G51760	OG0005576	Endodermis	1.23716
AT4G04610	OG0002411	Endodermis	1.23555
AT5G17460	OG0013276	Endodermis	1.23194
AT1G06550	OG0011176	Endodermis	1.2318
AT3G05500	OG0008669	Endodermis	1.23133
AT5G43780	OG0001086	Endodermis	1.22912
AT1G62840	OG0002415	Endodermis	1.22772
AT4G25570	OG0004887	Endodermis	1.22665
AT5G06300	OG0000428	Endodermis	1.22319
AT4G37790	OG0011408	Endodermis	1.21956
AT2G37040	OG0000756	Endodermis	1.20887
AT1G69410	OG0000710	Endodermis	1.20399
AT5G61210	OG0002767	Endodermis	1.2029
AT5G42655	OG0015247	Endodermis	1.1897
AT1G20696	OG0003053	Endodermis	1.18699
AT1G20440	OG0014469	Endodermis	1.18466
AT5G52310	OG0012366	Endodermis	1.17415
AT1G35260	OG0000813	Endodermis	1.16472
AT4G39070	OG0002021	Endodermis	1.16392
AT2G20630	OG0002482	Endodermis	1.15926
AT4G34920	OG0002735	Endodermis	1.1525
AT1G66760	OG0014583	Endodermis	1.14923
AT1G23120	OG0000678	Endodermis	1.14222
AT1G36160	OG0003123	Endodermis	1.13891
AT1G43700	OG0001828	Endodermis	1.13149
AT3G22890	OG0001086	Endodermis	1.13072
AT1G22470	OG0001787	Endodermis	1.13018
AT4G28840	OG0002506	Endodermis	1.12807
AT4G10500	OG0012531	Endodermis	1.12759
AT1G05710	OG0008019	Endodermis	1.11835
AT1G13360	OG0001306	Endodermis	1.10766
AT3G56130	OG0018385	Endodermis	1.09342
AT1G61795	OG0000330	Endodermis	1.08837
AT5G01820	OG0015189	Endodermis	1.08338
AT1G72710	OG0001802	Endodermis	1.07655
AT5G37740	OG0000249	Endodermis	1.07227
AT2G42430	OG0011343	Endodermis	1.07063
AT5G58070	OG0004987	Endodermis	1.06856
AT5G07010	OG0000049	Endodermis	1.06815
AT4G20140	OG0006646	Endodermis	1.06527
AT3G11660	OG0004539	Endodermis	1.06231
AT1G42960	OG0014651	Endodermis	1.06153
AT4G33910	OG0009139	Endodermis	1.05549
AT2G27510	OG0000917	Endodermis	1.04875
AT5G61820	OG0009379	Endodermis	1.04636
AT1G14690	OG0001023	Endodermis	1.04421
AT5G58700	OG0000900	Endodermis	1.03889
AT4G34350	OG0012357	Endodermis	1.03655
AT2G32150	OG0011546	Endodermis	1.02519
AT1G09090	OG0005452	Endodermis	1.02473
AT1G69490	OG0007731	Endodermis	1.01454
AT1G09970	OG0005842	Endodermis	1.00865
AT4G29220	OG0000779	Endodermis	1.00775
AT1G03040	OG0001735	Endodermis	1.00452
AT4G34230	OG0009119	Endodermis	1.00265
AT4G17615	OG0009188	Endodermis	0.989359
AT5G45100	OG0002255	Endodermis	0.988211
AT5G54145	OG0012480	Endodermis	0.98344
AT2G30130	OG0008318	Endodermis	0.980249
AT3G49580	OG0000765	Endodermis	0.979886
AT1G63090	OG0017738	Endodermis	0.979872
AT5G42980	OG0010834	Endodermis	0.973282
AT3G55390	OG0012085	Endodermis	0.97183
AT1G53210	OG0007599	Endodermis	0.9708
AT3G06778	OG0012212	Endodermis	0.970711
AT5G06200	OG0006036	Endodermis	0.970375
AT2G30550	OG0003089	Endodermis	0.969289
AT2G36060	OG0004594	Endodermis	0.968033
AT5G55120	OG0006695	Endodermis	0.963316
AT2G17990	OG0005975	Endodermis	0.961526
AT4G33666	OG0018074	Endodermis	0.958998
AT1G60730	OG0001008	Endodermis	0.958996
AT5G54810	OG0004865	Endodermis	0.958563
AT1G76180	OG0014469	Endodermis	0.957576
AT5G15970	OG0018712	Endodermis	0.955234
AT1G78080	OG0002317	Endodermis	0.954734
AT3G16400	OG0005837	Endodermis	0.951972
AT3G52790	OG0018437	Endodermis	0.950387
AT5G09440	OG0005115	Endodermis	0.949529
AT1G72230	OG0001379	Endodermis	0.943388
AT2G33310	OG0002434	Endodermis	0.941525
AT4G19700	OG0002255	Endodermis	0.938905
AT5G03240	OG0000947	Endodermis	0.937599
AT1G22410	OG0001057	Endodermis	0.934629
AT4G40090	OG0011617	Trichoblast1	5.53222
AT4G02270	OG0005647	Trichoblast1	5.43111
AT3G62680	OG0005647	Trichoblast1	5.24054
AT4G25820	OG0015089	Trichoblast1	5.16102
AT5G67400	OG0000509	Trichoblast1	4.9248
AT4G26010	OG0003025	Trichoblast1	4.91256
AT5G57530	OG0015089	Trichoblast1	4.79458
AT5G57625	OG0018546	Trichoblast1	4.73424
AT4G00680	OG0003086	Trichoblast1	4.56195
AT3G49960	OG0000509	Trichoblast1	4.38374
AT5G06630	OG0004415	Trichoblast1	4.29936
AT4G25790	OG0018546	Trichoblast1	4.19358
AT2G30930	OG0017984	Trichoblast1	4.13985
AT3G54580	OG0010768	Trichoblast1	3.95188
AT1G01750	OG0003086	Trichoblast1	3.93589
AT4G13390	OG0004415	Trichoblast1	3.92016
AT5G44610	OG0009323	Trichoblast1	3.83765
AT5G04960	OG0011789	Trichoblast1	3.8147
AT5G05500	OG0013196	Trichoblast1	3.77079
AT4G28850	OG0004896	Trichoblast1	3.73862
AT2G24980	OG0004415	Trichoblast1	3.57091
AT2G20520	OG0002400	Trichoblast1	3.55675
AT1G54970	OG0005647	Trichoblast1	3.54791
AT5G17820	OG0003025	Trichoblast1	3.54644
AT3G54590	OG0010768	Trichoblast1	3.50323
AT4G22666	OG0012283	Trichoblast1	3.42713
AT5G06640	OG0004415	Trichoblast1	3.34823
AT4G01480	OG0000287	Trichoblast1	3.34656
AT3G28550	OG0010768	Trichoblast1	3.26976
AT5G43350	OG0000190	Trichoblast1	3.1925
AT1G06923	OG0005843	Trichoblast1	3.18012
AT5G22410	OG0002774	Trichoblast1	3.17284
AT3G05490	OG0002297	Trichoblast1	3.16938
AT2G19760	OG0000614	Trichoblast1	3.14248
AT3G54040	OG0002004	Trichoblast1	3.13246
AT1G34510	OG0003025	Trichoblast1	3.08526
AT4G34580	OG0001117	Trichoblast1	2.92767
AT4G25220	OG0017923	Trichoblast1	2.9115
AT1G62980	OG0007946	Trichoblast1	2.90717
AT1G30870	OG0011021	Trichoblast1	2.8987
AT2G41110	OG0000259	Trichoblast1	2.88523
AT3G09925	OG0014922	Trichoblast1	2.8792
AT1G22530	OG0017739	Trichoblast1	2.87108
AT1G12560	OG0007946	Trichoblast1	2.84631
AT2G04780	OG0004504	Trichoblast1	2.81547
AT3G60280	OG0008148	Trichoblast1	2.79501
AT3G61560	OG0000609	Trichoblast1	2.77048
AT3G18780	OG0000071	Trichoblast1	2.71462
AT4G30320	OG0012546	Trichoblast1	2.70876
AT1G05810	OG0002431	Trichoblast1	2.66314
AT1G63220	OG0004063	Trichoblast1	2.61343
AT1G23720	OG0010768	Trichoblast1	2.53962
AT2G01540	OG0017683	Trichoblast1	2.53323
AT1G47740	OG0002363	Trichoblast1	2.52183
AT5G53250	OG0000514	Trichoblast1	2.51458
AT5G35190	OG0004415	Trichoblast1	2.51177
AT5G44130	OG0002400	Trichoblast1	2.4786
AT1G01780	OG0010853	Trichoblast1	2.44102
AT5G40510	OG0011730	Trichoblast1	2.43702
AT1G11655	OG0011129	Trichoblast1	2.42386
AT4G09990	OG0001292	Trichoblast1	2.3605
AT2G39900	OG0011426	Trichoblast1	2.3411
AT5G56170	OG0001481	Trichoblast1	2.32219
AT4G22080	OG0010944	Trichoblast1	2.32173
AT3G07880	OG0001407	Trichoblast1	2.31791
AT2G25240	OG0014782	Trichoblast1	2.30334
AT1G35670	OG0001368	Trichoblast1	2.29501
AT4G08400	OG0004415	Trichoblast1	2.2816
AT5G58010	OG0009407	Trichoblast1	2.27841
AT2G46170	OG0000609	Trichoblast1	2.26974
AT2G46860	OG0000287	Trichoblast1	2.25105
AT2G39518	OG0001134	Trichoblast1	2.24694
AT4G18430	OG0000415	Trichoblast1	2.23637
AT5G42510	OG0007464	Trichoblast1	2.20756
AT5G60660	OG0000292	Trichoblast1	2.17901
AT4G01110	OG0011273	Trichoblast1	2.1635
AT1G62660	OG0003010	Trichoblast1	2.12324
AT4G08410	OG0004415	Trichoblast1	2.12137
AT5G05370	OG0004716	Trichoblast1	2.11137
AT1G13950	OG0000710	Trichoblast1	2.10281
AT5G46870	OG0002736	Trichoblast1	2.06452
AT2G21045	OG0003239	Trichoblast1	2.05302
AT1G60810	OG0002209	Trichoblast1	2.0335
AT5G26080	OG0008885	Trichoblast1	2.02829
AT2G27080	OG0005934	Trichoblast1	2.01056
AT2G32270	OG0001371	Trichoblast1	1.98402
AT1G01453	OG0011273	Trichoblast1	1.96194
AT4G24026	OG0002740	Trichoblast1	1.96086
AT4G23710	OG0002661	Trichoblast1	1.96014
AT1G08340	OG0003102	Trichoblast1	1.93148
AT2G41970	OG0003307	Trichoblast1	1.90407
AT1G10200	OG0002394	Trichoblast1	1.9028
AT3G23190	OG0018332	Trichoblast1	1.90029
AT2G23620	OG0000178	Trichoblast1	1.89213
AT3G17600	OG0011771	Trichoblast1	1.89212
AT4G26690	OG0001399	Trichoblast1	1.88551
AT3G05990	OG0011904	Trichoblast1	1.8669
AT3G22570	OG0000426	Trichoblast1	1.85572
AT5G56950	OG0018536	Trichoblast1	1.85122
AT3G60330	OG0000087	Trichoblast1	1.8456
AT3G23600	OG0001997	Trichoblast1	1.84215
AT1G73580	OG0000249	Trichoblast1	1.83525
AT3G20410	OG0000362	Trichoblast1	1.8293
AT2G03720	OG0002980	Trichoblast1	1.81866
AT3G56800	OG0000259	Trichoblast1	1.80034
AT2G32380	OG0002327	Trichoblast1	1.78748
AT1G56220	OG0005841	Trichoblast1	1.78086
AT4G30190	OG0000087	Trichoblast1	1.76762
AT5G44020	OG0014670	Trichoblast1	1.76504
AT4G18640	OG0002046	Trichoblast1	1.76007
AT1G12950	OG0000686	Trichoblast1	1.75294
AT1G20090	OG0000327	Trichoblast1	1.74122
AT3G06300	OG0006430	Trichoblast1	1.73243
AT2G31350	OG0005764	Trichoblast1	1.72964
AT1G14170	OG0018037	Trichoblast1	1.72253
AT1G78300	OG0000124	Trichoblast1	1.71855
AT3G48140	OG0003472	Trichoblast1	1.7174
AT4G02620	OG0009157	Trichoblast1	1.71097
AT1G45145	OG0010834	Trichoblast1	1.71092
AT4G38920	OG0000328	Trichoblast1	1.69344
AT4G33730	OG0006107	Trichoblast1	1.68934
AT1G70410	OG0001050	Trichoblast1	1.68832
AT1G55160	OG0002450	Trichoblast1	1.68284
AT1G78260	OG0005662	Trichoblast1	1.68068
AT2G22170	OG0002525	Trichoblast1	1.67293
AT3G52730	OG0012155	Trichoblast1	1.67113
AT2G30410	OG0011627	Trichoblast1	1.66487
AT5G60920	OG0000764	Trichoblast1	1.66435
AT1G75840	OG0000327	Trichoblast1	1.658
AT2G47540	OG0005647	Trichoblast1	1.65137
AT1G27740	OG0004151	Trichoblast1	1.6436
AT4G29180	OG0000042	Trichoblast1	1.6365
AT3G46830	OG0002228	Trichoblast1	1.63578
AT1G03870	OG0002400	Trichoblast1	1.63505
AT1G09740	OG0007419	Trichoblast1	1.63302
AT1G49240	OG0000071	Trichoblast1	1.63069
AT5G07470	OG0002729	Trichoblast1	1.62981
AT3G15020	OG0002268	Trichoblast1	1.62802
AT2G47360	OG0014644	Trichoblast1	1.62576
AT5G40860	OG0004812	Trichoblast1	1.62435
AT1G19910	OG0000328	Trichoblast1	1.61624
AT4G26570	OG0001576	Trichoblast1	1.61539
AT2G47650	OG0000515	Trichoblast1	1.61234
AT2G17130	OG0002492	Trichoblast1	1.60433
AT1G02570	OG0014644	Trichoblast1	1.59746
AT5G39320	OG0000569	Trichoblast1	1.59233
AT1G53680	OG0000158	Trichoblast1	1.58845
AT1G27330	OG0005500	Trichoblast1	1.58705
AT3G14350	OG0001431	Trichoblast1	1.583
AT1G80230	OG0001730	Trichoblast1	1.5812
AT5G57490	OG0003742	Trichoblast1	1.57967
AT5G67500	OG0004680	Trichoblast1	1.57849
AT1G48240	OG0003190	Trichoblast1	1.57124
AT1G12040	OG0005760	Trichoblast1	1.5661
AT5G59150	OG0002228	Trichoblast1	1.56456
AT4G27320	OG0018552	Trichoblast1	1.55513
AT1G54410	OG0007409	Trichoblast1	1.5525
AT5G59520	OG0009797	Trichoblast1	1.54737
AT3G17780	OG0007975	Trichoblast1	1.546
AT3G07070	OG0003128	Trichoblast1	1.54575
AT4G09570	OG0001368	Trichoblast1	1.53965
AT3G43810	OG0000259	Trichoblast1	1.53484
AT5G15320	OG0006452	Trichoblast1	1.53045
AT4G34720	OG0000328	Trichoblast1	1.52279
AT4G19680	OG0001744	Trichoblast1	1.51933
AT4G25570	OG0004887	Trichoblast1	1.51685
AT5G15650	OG0000626	Trichoblast1	1.50552
AT1G20050	OG0005766	Trichoblast1	1.5005
AT5G48900	OG0000589	Trichoblast1	1.49823
AT2G40765	OG0011483	Trichoblast1	1.49797
AT1G48930	OG0011073	Trichoblast1	1.49552
AT4G21105	OG0004904	Trichoblast1	1.49503
AT2G20760	OG0001129	Trichoblast1	1.48641
AT2G17720	OG0001824	Trichoblast1	1.48096
AT4G29905	OG0000782	Trichoblast1	1.47756
AT1G34760	OG0017968	Trichoblast1	1.4644
AT1G70460	OG0000825	Trichoblast1	1.46331
AT4G33360	OG0012497	Trichoblast1	1.45914
AT4G35950	OG0000327	Trichoblast1	1.45471
AT2G38500	OG0014840	Trichoblast1	1.45248
AT4G18800	OG0002412	Trichoblast1	1.4505
AT1G23750	OG0005531	Trichoblast1	1.43992
AT2G46140	OG0001076	Trichoblast1	1.43612
AT2G16510	OG0000328	Trichoblast1	1.43124
AT1G24180	OG0002259	Trichoblast1	1.42925
AT1G16170	OG0004018	Trichoblast1	1.42502
AT4G29480	OG0004413	Trichoblast1	1.4174
AT5G14390	OG0000938	Trichoblast1	1.41662
AT5G19800	OG0008885	Trichoblast1	1.41057
AT4G17100	OG0002054	Trichoblast1	1.40738
AT5G50460	OG0002002	Trichoblast1	1.40514
AT5G59613	OG0004673	Trichoblast1	1.4042
AT4G20870	OG0003288	Trichoblast1	1.39837
AT5G66280	OG0004774	Trichoblast1	1.39772
AT1G34750	OG0004299	Trichoblast1	1.39676
AT4G26710	OG0006581	Trichoblast1	1.39589
AT1G78900	OG0005473	Trichoblast1	1.3952
AT3G16690	OG0002617	Trichoblast1	1.39261
AT1G72430	OG0017734	Trichoblast1	1.39152
AT3G63080	OG0008080	Trichoblast1	1.39126
AT4G35350	OG0001727	Xylem	5.05762
AT1G20850	OG0001727	Xylem	4.27247
AT3G18280	OG0001811	Xylem	3.69932
AT4G23690	OG0001069	Xylem	3.54911
AT5G59290	OG0001906	Xylem	3.39185
AT5G15490	OG0000569	Xylem	3.22899
AT5G16490	OG0018628	Xylem	2.7418
AT1G75280	OG0000581	Xylem	2.73899
AT4G28140	OG0002472	Xylem	2.63737
AT5G02640	OG0009507	Xylem	2.63729
AT2G28315	OG0008357	Xylem	2.55603
AT1G12780	OG0005443	Xylem	2.42146
AT5G49460	OG0003481	Xylem	2.41921
AT1G55210	OG0007716	Xylem	2.40254
AT5G50950	OG0008193	Xylem	2.40237
AT3G53620	OG0000287	Xylem	2.36308
AT3G51030	OG0006220	Xylem	2.18676
AT3G21270	OG0000571	Xylem	2.13677
AT5G03170	OG0003708	Xylem	2.13164
AT3G43250	OG0004356	Xylem	2.05644
AT1G35780	OG0003109	Xylem	2.04712
AT1G60810	OG0002209	Xylem	2.00874
AT1G14890	OG0014444	Xylem	1.995
AT3G51670	OG0006233	Xylem	1.9785
AT1G68810	OG0005437	Xylem	1.96917
AT1G12080	OG0017964	Xylem	1.90016
AT3G29360	OG0000569	Xylem	1.85012
AT2G37750	OG0002470	Xylem	1.84223
AT3G03341	OG0012213	Xylem	1.80772
AT2G13820	OG0000893	Xylem	1.77919
AT3G12110	OG0000071	Xylem	1.76566
AT1G62981	OG0005856	Xylem	1.74998
AT4G15802	OG0006699	Xylem	1.6758
AT1G77690	OG0000316	Xylem	1.67013
AT5G60490	OG0003708	Xylem	1.64667
AT1G02640	OG0004276	Xylem	1.6421
AT1G32100	OG0000843	Xylem	1.64184
AT1G24600	OG0007703	Xylem	1.64123
AT5G62770	OG0000630	Xylem	1.59685
AT3G05880	OG0003524	Xylem	1.58122
AT5G67230	OG0004902	Xylem	1.54881
AT2G15830	OG0010614	Xylem	1.54253
AT4G36160	OG0000146	Xylem	1.53997
AT3G23170	OG0007582	Xylem	1.53411
AT4G23670	OG0000678	Xylem	1.53133
AT1G72800	OG0001800	Xylem	1.51743
AT2G39400	OG0004419	Xylem	1.51466
AT2G31360	OG0003192	Xylem	1.50132
AT1G33800	OG0001292	Xylem	1.48605
AT1G72230	OG0001379	Xylem	1.48173
AT1G80110	OG0000698	Xylem	1.46665
AT1G79620	OG0010741	Xylem	1.46169
AT3G56170	OG0004593	Xylem	1.44686
AT2G47500	OG0001320	Xylem	1.44617
AT1G09210	OG0004006	Xylem	1.43747
AT5G06370	OG0012698	Xylem	1.43506
AT3G06035	OG0003416	Xylem	1.42731
AT3G47400	OG0008693	Xylem	1.41871
AT2G46225	OG0004601	Xylem	1.41373
AT5G26667	OG0001498	Xylem	1.3968
AT4G34490	OG0003659	Xylem	1.38885
AT5G12250	OG0000101	Xylem	1.37992
AT2G03090	OG0000736	Xylem	1.37412
AT3G55990	OG0000902	Xylem	1.34106
AT5G08370	OG0000968	Xylem	1.33773
AT5G18310	OG0004410	Xylem	1.32876
AT2G47770	OG0008281	Xylem	1.30199
AT4G37450	OG0018203	Xylem	1.30168
AT3G10740	OG0003436	Xylem	1.29069
AT4G24780	OG0000589	Xylem	1.28748
AT3G25710	OG0005437	Xylem	1.28464
AT1G33470	OG0007845	Xylem	1.28205
AT5G66920	OG0009381	Xylem	1.27261
AT4G15910	OG0012473	Xylem	1.26581
AT3G25900	OG0015021	Xylem	1.25515
AT3G05910	OG0008634	Xylem	1.2433
AT3G57450	OG0008727	Xylem	1.2404
AT1G71880	OG0003003	Xylem	1.23552
AT3G18660	OG0001723	Xylem	1.23379
AT5G49720	OG0006686	Xylem	1.2304
AT5G59890	OG0006935	Xylem	1.22974
AT3G16570	OG0002297	Xylem	1.22927
AT3G59690	OG0006150	Xylem	1.219
AT3G12955	OG0015014	Xylem	1.21663
AT1G53170	OG0000562	Xylem	1.21299
AT5G63160	OG0004738	Xylem	1.20701
AT1G13930	OG0005632	Xylem	1.18902
AT1G23190	OG0003970	Xylem	1.18604
AT1G71050	OG0002321	Xylem	1.18486
AT2G04850	OG0011478	Xylem	1.17973
AT1G12260	OG0000146	Xylem	1.16075
AT3G23810	OG0006218	Xylem	1.15412
AT5G55180	OG0004525	Xylem	1.1518
AT1G50010	OG0000254	Xylem	1.14975
AT1G17620	OG0001337	Xylem	1.14893
AT3G22830	OG0001929	Xylem	1.14481
AT2G31200	OG0003384	Xylem	1.1433
AT4G08685	OG0002320	Xylem	1.14148
AT1G56600	OG0014484	Xylem	1.13116
AT2G16720	OG0018189	Xylem	1.13081
AT5G56540	OG0005714	Xylem	1.12241
AT2G30550	OG0003089	Xylem	1.12101
AT2G31110	OG0001348	Xylem	1.11692
AT1G09950	OG0002284	Xylem	1.10217
AT4G17890	OG0002013	Xylem	1.10136
AT1G15100	OG0011197	Xylem	1.08863
AT5G54240	OG0009096	Xylem	1.0868
AT5G14180	OG0002111	Xylem	1.08655
AT2G04780	OG0004504	Xylem	1.08469
AT1G10670	OG0002209	Xylem	1.08346
AT3G10080	OG0011922	Xylem	1.08166
AT3G14595	OG0001308	Xylem	1.0811
AT2G30060	OG0001040	Xylem	1.07947
AT5G09810	OG0000071	Xylem	1.07081
AT1G69080	OG0002980	Xylem	1.06978
AT2G33990	OG0002549	Xylem	1.06788
AT2G29050	OG0003268	Xylem	1.06563
AT5G23860	OG0000101	Xylem	1.06495
AT4G07950	OG0007895	Xylem	1.05858
AT4G11220	OG0000609	Xylem	1.04851
AT4G14960	OG0000254	Xylem	1.04842
AT2G20880	OG0002472	Xylem	1.03934
AT1G01240	OG0003169	Xylem	1.03061
AT4G18640	OG0002046	Xylem	1.03001
AT2G40070	OG0001871	Xylem	1.02993
AT1G02400	OG0002979	Xylem	1.02632
AT2G44770	OG0004508	Xylem	1.02215
AT5G57685	OG0002732	Xylem	1.02011
AT5G57560	OG0002731	Xylem	1.0193
AT1G22985	OG0017836	Xylem	1.00733
AT4G23680	OG0000678	Xylem	1.00418
AT3G01070	OG0005920	Xylem	0.99857
AT1G72150	OG0017739	Xylem	0.998194
AT2G34410	OG0001099	Xylem	0.993816
AT2G24762	OG0006131	Xylem	0.993146
AT2G40320	OG0003319	Xylem	0.989079
AT1G69680	OG0014570	Xylem	0.987737
AT1G62480	OG0017964	Xylem	0.987578
AT3G18950	OG0000479	Xylem	0.986189
AT1G04820	OG0000254	Xylem	0.977716
AT5G35670	OG0015177	Xylem	0.974352
AT5G64030	OG0000695	Xylem	0.968564
AT2G30395	OG0005843	Xylem	0.967051
AT1G70490	OG0000221	Xylem	0.96025
AT3G03250	OG0003418	Xylem	0.958365
AT3G16640	OG0004670	Xylem	0.953881
AT1G19300	OG0004215	Xylem	0.952029
AT3G25597	OG0004252	Xylem	0.946977
AT5G62700	OG0000101	Xylem	0.946963
AT5G49690	OG0000434	Xylem	0.944325
AT5G48500	OG0004410	Xylem	0.944275
AT2G35120	OG0004514	Xylem	0.941756
AT3G59350	OG0001409	Xylem	0.941544
AT3G17660	OG0018264	Xylem	0.934366
AT1G55330	OG0005714	Xylem	0.932165
AT5G01070	OG0001592	Xylem	0.931911
AT4G09890	OG0008998	Xylem	0.924783
AT1G75840	OG0000327	Xylem	0.921269
AT5G06760	OG0002088	Xylem	0.918916
AT4G05050	OG0017812	Xylem	0.916576
AT2G35760	OG0011628	Xylem	0.913874
AT5G02010	OG0012676	Xylem	0.907851
AT5G43700	OG0000837	Xylem	0.906865
AT3G17390	OG0000723	Xylem	0.905454
AT2G44670	OG0011552	Xylem	0.904279
AT5G23400	OG0012992	Xylem	0.901798
AT3G46440	OG0001906	Xylem	0.893488
AT4G09990	OG0001292	Xylem	0.891406
AT5G50450	OG0001738	Xylem	0.890837
AT1G64660	OG0005623	Xylem	0.888963
AT5G18130	OG0006367	Xylem	0.888474
AT2G21300	OG0002535	Xylem	0.883128
AT2G33830	OG0003237	Xylem	0.881097
AT1G05340	OG0001354	Xylem	0.878364
AT2G31390	OG0002401	Xylem	0.87732
AT5G42050	OG0006882	Xylem	0.874373
AT1G71695	OG0004296	Xylem	0.863626
AT2G19810	OG0000512	Xylem	0.8636
AT4G27960	OG0000125	Xylem	0.860684
AT1G24764	OG0001364	Xylem	0.856807
AT3G53750	OG0000071	Xylem	0.85513
AT2G47470	OG0003399	Xylem	0.854354
AT3G15540	OG0014590	Xylem	0.852221
AT5G17920	OG0001499	Xylem	0.85011
AT4G35550	OG0004881	Xylem	0.849197
AT3G50060	OG0002557	Xylem	0.84886
AT4G11210	OG0001069	Xylem	0.845394
AT1G75600	OG0000062	Xylem	0.840528
AT4G28290	OG0009046	Xylem	0.837748
AT3G11170	OG0002632	Xylem	0.833892
AT1G52910	OG0004214	Xylem	0.831598
AT2G22122	OG0014766	Xylem	0.83145
AT4G26320	OG0005714	Xylem	0.829046
AT5G16010	OG0003695	Xylem	0.825427
AT2G37620	OG0000071	Xylem	0.824857
AT1G29050	OG0001348	Xylem	0.821862
AT3G57870	OG0001973	Xylem	0.820918
AT5G62020	OG0001216	Xylem	0.819572
AT1G67300	OG0003054	Xylem	0.817
[truncated: 201 more rows]

## Sheet: ATH_SHAP
Table S8: OMGs with top 200 marker genes found by Seurat, SHAP, and SVM for each cell-type cluster in Arabidopsis, rice, maize, and tomato.
Marker_Genes	Clusters	Novel	SHAP_values	Orthogroup
AT4G12545	Atrichoblast1	Novel	0.00615982	OG0015071
AT2G46740	Atrichoblast1	Novel	0.00527033	OG0002299
AT2G37130	Atrichoblast1	Novel	0.00495891	OG0011420
AT3G16420	Atrichoblast1	Novel	0.0046046	OG0000083
AT3G09260	Atrichoblast1	Novel	0.00459184	OG0001305
AT2G43590	Atrichoblast1	Novel	0.00406734	OG0001138
AT4G12550	Atrichoblast1	Novel	0.00383253	OG0015071
AT3G29250	Atrichoblast1	Novel	0.00325327	OG0001440
AT4G37070	Atrichoblast1	Novel	0.0030367	OG0015037
AT5G26260	Atrichoblast1	Novel	0.00277123	OG0000112
AT5G45280	Atrichoblast1	Novel	0.0025854	OG0009044
AT1G14960	Atrichoblast1	Novel	0.00239648	OG0000678
AT3G28550	Atrichoblast1	Novel	0.00217296	OG0010768
AT2G17500	Atrichoblast1	Novel	0.00214912	OG0000887
AT1G70850	Atrichoblast1	Novel	0.0021058	OG0000813
AT2G46140	Atrichoblast1	Novel	0.00209893	OG0001076
AT5G06860	Atrichoblast1	Novel	0.00206917	OG0001168
AT4G13940	Atrichoblast1	Novel	0.00202762	OG0006218
AT2G21045	Atrichoblast1	Novel	0.00186279	OG0003239
AT5G48010	Atrichoblast1	Novel	0.00184577	OG0004267
AT1G73260	Atrichoblast1	Novel	0.00170721	OG0001314
AT1G06120	Atrichoblast1	Novel	0.00164653	OG0003192
AT1G19020	Atrichoblast1	Novel	0.00161164	OG0000858
AT2G39530	Atrichoblast1	Novel	0.00151401	OG0001134
AT3G52590	Atrichoblast1	Novel	0.00148539	OG0003390
AT5G60390	Atrichoblast1	Novel	0.00134296	OG0000174
AT4G20860	Atrichoblast1	Novel	0.00118316	OG0003627
AT4G19030	Atrichoblast1	Novel	0.00117607	OG0002542
AT5G64100	Atrichoblast1	Novel	0.00112805	OG0018710
AT1G33140	Atrichoblast1	Novel	0.00110861	OG0000591
AT1G14870	Atrichoblast1	Novel	0.001103	OG0000250
AT3G09200	Atrichoblast1	Novel	0.00109972	OG0001127
AT5G44380	Atrichoblast1	Novel	0.0010895	OG0011400
AT4G27090	Atrichoblast1	Novel	0.00108525	OG0002550
AT2G16600	Atrichoblast1	Novel	0.00104021	OG0001113
AT4G34870	Atrichoblast1	Novel	0.00101237	OG0001113
AT3G04720	Atrichoblast1	Novel	0.000996899	OG0001545
AT1G66800	Atrichoblast1	Novel	0.000962044	OG0007459
AT3G24670	Atrichoblast1	Novel	0.000911939	OG0000589
AT3G16460	Atrichoblast1	Novel	0.000901051	OG0000083
AT5G18380	Atrichoblast1	Novel	0.000877815	OG0001485
AT4G21960	Atrichoblast1	Novel	0.000829657	OG0018576
AT5G07460	Atrichoblast1	Novel	0.000810379	OG0002729
AT5G19510	Atrichoblast1	Novel	0.000800593	OG0009419
AT4G30290	Atrichoblast1	Novel	0.000787181	OG0010871
AT1G55210	Atrichoblast1	Novel	0.000768981	OG0007716
AT1G25275	Atrichoblast1	Novel	0.000767188	OG0011246
AT2G30395	Atrichoblast1	Novel	0.000746004	OG0005843
AT5G66170	Atrichoblast1	Novel	0.000743191	OG0003239
AT2G37040	Atrichoblast1	Novel	0.000736147	OG0000756
AT3G01290	Atrichoblast1	Novel	0.000702659	OG0000491
AT4G30280	Atrichoblast1	Novel	0.000696169	OG0010871
AT1G30230	Atrichoblast1	Novel	0.000666882	OG0004358
AT2G39040	Atrichoblast1	Novel	0.000653488	OG0001142
AT4G34230	Atrichoblast1	Novel	0.0006444	OG0009119
AT4G39670	Atrichoblast1	Novel	0.000619063	OG0012507
AT2G05220	Atrichoblast1	Novel	0.000607865	OG0001913
AT2G29995	Atrichoblast1	Novel	0.00058318	OG0011268
AT3G03250	Atrichoblast1	Novel	0.000577336	OG0003418
AT4G00100	Atrichoblast1	Novel	0.000571958	OG0001954
AT4G01410	Atrichoblast1	Novel	0.000553618	OG0015081
AT2G17280	Atrichoblast1	Novel	0.000550307	OG0006022
AT3G08030	Atrichoblast1	Novel	0.000529623	OG0006291
AT1G80240	Atrichoblast1	Novel	0.00051795	OG0001729
AT2G30860	Atrichoblast1	Novel	0.000516718	OG0018126
AT5G58710	Atrichoblast1	Novel	0.000499238	OG0006059
AT1G65310	Atrichoblast1	Novel	0.000497496	OG0010871
AT5G40690	Atrichoblast1	Novel	0.00048827	OG0012865
AT1G23720	Atrichoblast1	Novel	0.000456573	OG0010768
AT2G35730	Atrichoblast1	Novel	0.000452447	OG0008426
AT5G48657	Atrichoblast1	Novel	0.000427466	OG0018324
AT4G21840	Atrichoblast1	Novel	0.000427186	OG0018564
AT5G03300	Atrichoblast1	Novel	0.000423601	OG0002674
AT2G21660	Atrichoblast1	Novel	0.000417683	OG0001140
AT3G28910	Atrichoblast1	Novel	0.000416201	OG0000160
AT5G50460	Atrichoblast1	Novel	0.000398075	OG0002002
AT1G10370	Atrichoblast1	Novel	0.000392316	OG0001082
AT1G12950	Atrichoblast1	Novel	0.00035988	OG0000686
AT3G23810	Atrichoblast1	Novel	0.00035007	OG0006218
AT1G78000	Atrichoblast1	Novel	0.000347429	OG0002322
AT2G05990	Atrichoblast1	Novel	0.000327932	OG0008436
AT1G21750	Atrichoblast1	Novel	0.000293544	OG0001671
AT1G30700	Atrichoblast1	Novel	0.000292353	OG0002385
AT1G78830	Atrichoblast1	Novel	0.000284446	OG0003129
AT3G16430	Atrichoblast1	Novel	0.000265698	OG0000083
AT4G20780	Atrichoblast1	Novel	0.000260467	OG0002032
AT4G15760	Atrichoblast1	Novel	0.000260272	OG0003673
AT3G26440	Atrichoblast1	Novel	0.000259716	OG0017744
AT2G38870	Atrichoblast1	Novel	0.000250943	OG0000106
AT5G42600	Atrichoblast1	Novel	0.000233562	OG0004267
AT1G70790	Atrichoblast1	Novel	0.000232564	OG0017683
AT1G53830	Atrichoblast1	Novel	0.000228775	OG0002252
AT5G14360	Atrichoblast1	Novel	0.000212525	OG0006955
AT1G22400	Atrichoblast1	Novel	0.0002124	OG0000487
AT3G03780	Atrichoblast1	Novel	0.000208921	OG0001499
AT4G37010	Atrichoblast1	Novel	0.000202849	OG0008577
AT5G55190	Atrichoblast1	Novel	0.000202235	OG0002797
AT5G59030	Atrichoblast1	Novel	0.000201373	OG0000898
AT3G05390	Atrichoblast1	Novel	0.000196941	OG0008566
AT5G48175	Atrichoblast1	Novel	0.000189811	OG0001305
AT3G29780	Atrichoblast1	Novel	0.000183934	OG0014892
AT3G01190	Atrichoblast1	Novel	0.000181868	OG0000773
AT5G08240	Atrichoblast1	Novel	0.000171565	OG0006735
AT1G56340	Atrichoblast1	Novel	0.000171431	OG0004006
AT5G24140	Atrichoblast1	Novel	0.000167851	OG0013151
AT1G72800	Atrichoblast1	Novel	0.000151695	OG0001800
AT3G57520	Atrichoblast1	Novel	0.000149061	OG0011969
AT4G28940	Atrichoblast1	Novel	0.000145872	OG0003613
AT3G14770	Atrichoblast1	Novel	0.000141189	OG0004666
AT3G56490	Atrichoblast1	Novel	0.000138698	OG0002313
AT5G54240	Atrichoblast1	Novel	0.000137179	OG0009096
AT4G14560	Atrichoblast1	Novel	0.000136505	OG0000837
AT3G19660	Atrichoblast1	Novel	0.000133197	OG0008778
AT3G16400	Atrichoblast1	Novel	0.000119256	OG0005837
AT1G13280	Atrichoblast1	Novel	0.000116754	OG0002232
AT2G41810	Atrichoblast1	Novel	0.000111415	OG0011432
AT5G07860	Atrichoblast1	Novel	0.000109756	OG0002769
AT4G31985	Atrichoblast1	Novel	0.000107368	OG0004938
AT2G26370	Atrichoblast1	Novel	0.000105395	OG0004134
AT5G52920	Atrichoblast1	Novel	0.000103629	OG0015257
AT4G33110	Atrichoblast1	Novel	0.000100826	OG0002749
AT3G07680	Atrichoblast1	Novel	9.63714e-05	OG0003442
AT1G78570	Atrichoblast1	Novel	9.52707e-05	OG0003029
AT3G25220	Atrichoblast1	Novel	9.51681e-05	OG0004780
AT3G55970	Atrichoblast1	Novel	9.34943e-05	OG0000888
AT3G15370	Atrichoblast1	Novel	9.13005e-05	OG0018348
AT2G37640	Atrichoblast1	Novel	8.87246e-05	OG0001441
AT5G35530	Atrichoblast1	Novel	8.85733e-05	OG0001445
AT2G31610	Atrichoblast1	Novel	8.83415e-05	OG0001445
AT2G45220	Atrichoblast1	Novel	8.62983e-05	OG0018138
AT1G30580	Atrichoblast1	Novel	8.22977e-05	OG0011064
AT5G26360	Atrichoblast1	Novel	8.16639e-05	OG0009514
AT2G18690	Atrichoblast1	Novel	7.93371e-05	OG0008191
AT4G21150	Atrichoblast1	Novel	7.80482e-05	OG0006642
AT3G55360	Atrichoblast1	Novel	7.66283e-05	OG0008828
AT5G50560	Atrichoblast1	Novel	7.56178e-05	OG0018736
AT1G04430	Atrichoblast1	Novel	7.5531e-05	OG0001710
AT2G01720	Atrichoblast1	Novel	7.51038e-05	OG0011661
AT2G18400	Atrichoblast1	Novel	7.47849e-05	OG0005897
AT3G60520	Atrichoblast1	Novel	7.43007e-05	OG0001754
AT5G39670	Atrichoblast1	Novel	7.32872e-05	OG0003512
AT5G10360	Atrichoblast1	Novel	7.2196e-05	OG0003610
AT3G44860	Atrichoblast1	Novel	7.10495e-05	OG0001818
AT2G03120	Atrichoblast1	Novel	6.94347e-05	OG0008402
AT1G56010	Atrichoblast1	Novel	6.91414e-05	OG0008025
AT4G02290	Atrichoblast1	Novel	6.83991e-05	OG0012528
AT1G07590	Atrichoblast1	Novel	6.433e-05	OG0010616
AT1G74050	Atrichoblast1	Novel	6.38931e-05	OG0001374
AT5G19690	Atrichoblast1	Novel	6.24564e-05	OG0009468
AT5G25450	Atrichoblast1	Novel	6.18405e-05	OG0003664
AT2G25110	Atrichoblast1	Novel	6.17288e-05	OG0005940
AT5G40780	Atrichoblast1	Novel	6.09843e-05	OG0000498
AT4G18170	Atrichoblast1	Novel	6.08742e-05	OG0018495
AT5G58650	Atrichoblast1	Novel	6.08558e-05	OG0011268
AT1G79390	Atrichoblast1	Novel	5.98065e-05	OG0017824
AT1G76010	Atrichoblast1	Novel	5.81831e-05	OG0001682
AT1G24360	Atrichoblast1	Novel	5.78848e-05	OG0002376
AT1G18980	Atrichoblast1	Novel	5.72468e-05	OG0002221
AT4G33250	Atrichoblast1	Novel	5.6106e-05	OG0012484
AT2G29550	Atrichoblast1	Novel	5.60053e-05	OG0000101
AT1G30820	Atrichoblast1	Novel	5.51204e-05	OG0000866
AT1G73010	Atrichoblast1	Novel	5.43682e-05	OG0000861
AT1G64980	Atrichoblast1	Novel	5.35045e-05	OG0002342
AT4G34200	Atrichoblast1	Novel	5.32129e-05	OG0000883
AT5G66680	Atrichoblast1	Novel	5.29308e-05	OG0012705
AT5G20890	Atrichoblast1	Novel	5.27364e-05	OG0009545
AT2G41380	Atrichoblast1	Novel	5.18893e-05	OG0001104
AT5G67620	Atrichoblast1	Novel	5.16985e-05	OG0009807
AT5G39610	Atrichoblast1	Novel	5.15628e-05	OG0000378
AT3G61410	Atrichoblast1	Novel	5.12305e-05	OG0002380
AT2G16005	Atrichoblast1	Novel	5.01656e-05	OG0004134
AT4G24190	Atrichoblast1	Novel	4.99193e-05	OG0009267
AT5G42020	Atrichoblast1	Novel	4.98124e-05	OG0003748
AT5G03160	Atrichoblast1	Novel	4.86836e-05	OG0006812
AT1G04690	Atrichoblast1	Novel	4.81505e-05	OG0005612
AT5G13850	Atrichoblast1	Novel	4.79211e-05	OG0000620
AT2G29500	Atrichoblast1	Novel	4.77422e-05	OG0000557
AT1G76930	Atrichoblast1	Novel	4.67383e-05	OG0007530
AT3G19030	Atrichoblast1	Novel	4.62155e-05	OG0010614
AT5G60640	Atrichoblast1	Novel	4.58519e-05	OG0003482
AT1G57990	Atrichoblast1	Novel	4.56687e-05	OG0004053
AT5G23510	Atrichoblast1	Novel	4.52864e-05	OG0003691
AT1G27435	Atrichoblast1	Novel	4.43503e-05	OG0010936
AT4G37390	Atrichoblast1	Novel	4.42962e-05	OG0000568
AT5G11070	Atrichoblast1	Novel	4.38427e-05	OG0002532
AT1G14900	Atrichoblast1	Novel	4.35808e-05	OG0003963
AT4G33790	Atrichoblast1	Novel	4.35222e-05	OG0001513
AT1G07920	Atrichoblast1	Novel	4.34774e-05	OG0000174
AT2G27130	Atrichoblast1	Novel	4.3137e-05	OG0003365
AT5G46290	Atrichoblast1	Novel	4.29827e-05	OG0005145
AT2G22850	Atrichoblast1	Novel	4.08718e-05	OG0011412
AT4G27260	Atrichoblast1	Novel	4.03161e-05	OG0000912
AT2G39705	Atrichoblast1	Novel	3.88479e-05	OG0008419
AT3G46230	Atrichoblast1	Novel	3.85693e-05	OG0000870
AT4G16190	Atrichoblast1	Novel	3.81376e-05	OG0002564
AT3G62120	Atrichoblast1	Novel	3.74213e-05	OG0004674
AT3G10520	Atrichoblast1	Novel	3.63434e-05	OG0018429
AT1G04980	Atrichoblast1	Novel	3.63228e-05	OG0005646
AT4G07950	Atrichoblast1	Novel	3.51968e-05	OG0007895
AT5G14200	Atrichoblast1	Novel	3.5127e-05	OG0003066
AT1G28290	Atrichoblast2	Novel	0.0019407	OG0000418
AT5G56540	Atrichoblast2	Novel	0.00181208	OG0005714
AT4G22235	Atrichoblast2	Novel	0.00157613	OG0006544
AT2G41800	Atrichoblast2	Novel	0.00145949	OG0011432
AT2G43610	Atrichoblast2	Novel	0.00135242	OG0010773
AT3G05020	Atrichoblast2	Novel	0.00127395	OG0000413
AT1G66270	Atrichoblast2	Novel	0.00110867	OG0001305
AT1G74500	Atrichoblast2	Novel	0.00108518	OG0017791
AT4G22230	Atrichoblast2	Novel	0.000977954	OG0006544
AT1G54580	Atrichoblast2	Novel	0.000921889	OG0000413
AT2G25980	Atrichoblast2	Novel	0.000879957	OG0000083
AT1G54000	Atrichoblast2	Novel	0.000822084	OG0005544
AT2G45050	Atrichoblast2	Novel	0.000819571	OG0004489
AT5G14750	Atrichoblast2	Novel	0.000773825	OG0015004
AT5G35940	Atrichoblast2	Novel	0.000752781	OG0000083
AT4G38740	Atrichoblast2	Novel	0.000667132	OG0001113
AT5G42630	Atrichoblast2	Novel	0.00066519	OG0009801
AT2G33790	Atrichoblast2	Novel	0.000631172	OG0000418
AT2G21160	Atrichoblast2	Novel	0.000623903	OG0003254
AT4G23590	Atrichoblast2	Novel	0.000617443	OG0006105
AT4G37870	Atrichoblast2	Novel	0.000544991	OG0004927
AT2G47140	Atrichoblast2	Novel	0.000537863	OG0001440
AT1G65980	Atrichoblast2	Novel	0.000519851	OG0005364
AT3G19820	Atrichoblast2	Novel	0.000514549	OG0008904
AT5G19340	Atrichoblast2	Novel	0.000491631	OG0011885
AT3G15950	Atrichoblast2	Novel	0.000487102	OG0014709
AT1G66280	Atrichoblast2	Novel	0.000459346	OG0001305
AT1G30550	Atrichoblast2	Novel	0.000446634	OG0011060
AT3G20370	Atrichoblast2	Novel	0.000445836	OG0000112
AT3G60530	Atrichoblast2	Novel	0.000440256	OG0004489
AT5G40330	Atrichoblast2	Novel	0.000437777	OG0015004
AT1G68560	Atrichoblast2	Novel	0.000437326	OG0005762
AT5G14030	Atrichoblast2	Novel	0.000410421	OG0004984
AT1G80830	Atrichoblast2	Novel	0.000394971	OG0007412
AT1G32210	Atrichoblast2	Novel	0.00038422	OG0007614
AT1G54630	Atrichoblast2	Novel	0.000370748	OG0000413
AT1G65290	Atrichoblast2	Novel	0.000364112	OG0002306
AT1G09210	Atrichoblast2	Novel	0.000353515	OG0004006
AT1G15930	Atrichoblast2	Novel	0.000347624	OG0001301
AT3G19200	Atrichoblast2	Novel	0.000340216	OG0014897
AT4G22930	Atrichoblast2	Novel	0.000338473	OG0012451
AT1G54030	Atrichoblast2	Novel	0.000335716	OG0005544
AT5G27700	Atrichoblast2	Novel	0.000315149	OG0001158
AT5G20950	Atrichoblast2	Novel	0.000309054	OG0000233
AT1G27400	Atrichoblast2	Novel	0.000303526	OG0004105
AT5G66590	Atrichoblast2	Novel	0.000301796	OG0015154
AT1G01050	Atrichoblast2	Novel	0.000284283	OG0000287
AT5G02580	Atrichoblast2	Novel	0.00028405	OG0000596
AT5G57090	Atrichoblast2	Novel	0.000276918	OG0012905
AT5G57290	Atrichoblast2	Novel	0.00027619	OG0003646
AT4G39840	Atrichoblast2	Novel	0.000275844	OG0000300
AT2G40475	Atrichoblast2	Novel	0.000275696	OG0003280
AT5G45920	Atrichoblast2	Novel	0.000272217	OG0003732
AT2G26240	Atrichoblast2	Novel	0.000269965	OG0008077
AT3G59850	Atrichoblast2	Novel	0.000266782	OG0000278
AT5G48900	Atrichoblast2	Novel	0.000253355	OG0000589
AT3G23470	Atrichoblast2	Novel	0.000250857	OG0008919
AT5G13870	Atrichoblast2	Novel	0.000249165	OG0008132
AT4G00810	Atrichoblast2	Novel	0.000243079	OG0014637
AT3G20940	Atrichoblast2	Novel	0.000242954	OG0000176
AT4G03190	Atrichoblast2	Novel	0.000240814	OG0006228
AT5G53900	Atrichoblast2	Novel	0.000239784	OG0006998
AT1G56045	Atrichoblast2	Novel	0.000238348	OG0005539
AT5G62340	Atrichoblast2	Novel	0.000236926	OG0000480
AT1G13590	Atrichoblast2	Novel	0.000228643	OG0000716
AT1G47640	Atrichoblast2	Novel	0.000226483	OG0014612
AT1G41830	Atrichoblast2	Novel	0.000224735	OG0000361
AT3G12120	Atrichoblast2	Novel	0.000224511	OG0000931
AT5G14020	Atrichoblast2	Novel	0.00022275	OG0012648
AT1G03230	Atrichoblast2	Novel	0.000205855	OG0000834
AT2G04160	Atrichoblast2	Novel	0.000204477	OG0001894
AT1G59960	Atrichoblast2	Novel	0.000200559	OG0000485
AT5G18460	Atrichoblast2	Novel	0.000197609	OG0013159
AT1G20050	Atrichoblast2	Novel	0.000195394	OG0005766
AT2G39210	Atrichoblast2	Novel	0.000193164	OG0001144
AT5G56360	Atrichoblast2	Novel	0.000187205	OG0002059
AT4G32870	Atrichoblast2	Novel	0.000179467	OG0001469
AT2G29020	Atrichoblast2	Novel	0.00017489	OG0008137
AT2G36620	Atrichoblast2	Novel	0.000171205	OG0003358
AT5G09510	Atrichoblast2	Novel	0.000166715	OG0001335
AT1G14320	Atrichoblast2	Novel	0.000166108	OG0003020
AT2G22230	Atrichoblast2	Novel	0.000161712	OG0005968
AT5G27770	Atrichoblast2	Novel	0.000161286	OG0002622
AT5G35740	Atrichoblast2	Novel	0.000158454	OG0011329
AT2G47460	Atrichoblast2	Novel	0.000155939	OG0018104
AT4G36130	Atrichoblast2	Novel	0.000155555	OG0002512
AT1G52600	Atrichoblast2	Novel	0.000153032	OG0004221
AT3G03280	Atrichoblast2	Novel	0.000146445	OG0001928
AT5G26280	Atrichoblast2	Novel	0.000146086	OG0000112
AT3G02230	Atrichoblast2	Novel	0.000143765	OG0000626
AT1G17285	Atrichoblast2	Novel	0.000141072	OG0014482
AT2G04100	Atrichoblast2	Novel	0.000140528	OG0006067
AT3G27230	Atrichoblast2	Novel	0.000140026	OG0001188
AT3G04120	Atrichoblast2	Novel	0.000140009	OG0001373
AT5G65640	Atrichoblast2	Novel	0.000139166	OG0001221
AT1G08360	Atrichoblast2	Novel	0.000137792	OG0001759
AT1G77350	Atrichoblast2	Novel	0.00013506	OG0010572
AT4G00710	Atrichoblast2	Novel	0.000134369	OG0000366
AT3G47380	Atrichoblast2	Novel	0.000134244	OG0000480
AT3G54960	Atrichoblast2	Novel	0.000132956	OG0003482
AT5G50375	Atrichoblast2	Novel	0.000129651	OG0015279
AT5G65810	Atrichoblast2	Novel	0.000128746	OG0002590
AT1G74060	Atrichoblast2	Novel	0.000127788	OG0001374
AT3G45030	Atrichoblast2	Novel	0.000127787	OG0003432
AT1G50430	Atrichoblast2	Novel	0.000123368	OG0007959
AT5G02500	Atrichoblast2	Novel	0.00012318	OG0000132
AT5G50180	Atrichoblast2	Novel	0.000122802	OG0012854
AT1G68150	Atrichoblast2	Novel	0.000122573	OG0011122
AT3G55280	Atrichoblast2	Novel	0.000121418	OG0001863
AT4G29735	Atrichoblast2	Novel	0.000121382	OG0012616
AT5G63650	Atrichoblast2	Novel	0.000120039	OG0000690
AT5G51780	Atrichoblast2	Novel	0.000118609	OG0002407
AT3G23560	Atrichoblast2	Novel	0.000115338	OG0001189
AT2G42870	Atrichoblast2	Novel	0.000115078	OG0008144
AT5G45775	Atrichoblast2	Novel	0.00011195	OG0000746
AT5G47950	Atrichoblast2	Novel	0.000106172	OG0003159
AT2G09990	Atrichoblast2	Novel	0.000102614	OG0001485
AT1G32190	Atrichoblast2	Novel	0.000101315	OG0010754
AT4G31290	Atrichoblast2	Novel	9.93642e-05	OG0006546
AT5G10840	Atrichoblast2	Novel	9.91138e-05	OG0000253
AT4G17190	Atrichoblast2	Novel	9.91103e-05	OG0006722
AT3G14530	Atrichoblast2	Novel	9.85228e-05	OG0000319
AT4G30080	Atrichoblast2	Novel	9.45655e-05	OG0001139
AT5G23840	Atrichoblast2	Novel	9.13653e-05	OG0004134
AT3G60910	Atrichoblast2	Novel	9.02754e-05	OG0011923
AT5G39600	Atrichoblast2	Novel	8.97487e-05	OG0009436
AT4G29870	Atrichoblast2	Novel	8.77283e-05	OG0008161
AT1G26945	Atrichoblast2	Novel	8.55893e-05	OG0001701
AT2G40590	Atrichoblast2	Novel	8.41816e-05	OG0002481
AT1G52070	Atrichoblast2	Novel	8.28875e-05	OG0000083
AT1G57620	Atrichoblast2	Novel	8.25333e-05	OG0003974
AT1G09580	Atrichoblast2	Novel	8.20622e-05	OG0003974
AT3G05900	Atrichoblast2	Novel	8.07993e-05	OG0014923
AT2G17080	Atrichoblast2	Novel	7.92531e-05	OG0003281
AT3G51660	Atrichoblast2	Novel	7.79727e-05	OG0018266
AT4G13850	Atrichoblast2	Novel	7.75846e-05	OG0002605
AT2G20515	Atrichoblast2	Novel	7.65583e-05	OG0011525
AT1G29310	Atrichoblast2	Novel	7.52264e-05	OG0001331
AT5G51500	Atrichoblast2	Novel	7.24211e-05	OG0008693
AT1G35320	Atrichoblast2	Novel	7.22086e-05	OG0011098
AT3G51000	Atrichoblast2	Novel	7.20617e-05	OG0008872
AT4G31320	Atrichoblast2	Novel	7.1639e-05	OG0006063
AT3G58850	Atrichoblast2	Novel	7.05217e-05	OG0008144
AT1G18080	Atrichoblast2	Novel	7.03344e-05	OG0001423
AT1G25450	Atrichoblast2	Novel	7.02506e-05	OG0007855
AT3G47210	Atrichoblast2	Novel	7.0186e-05	OG0003447
AT1G62810	Atrichoblast2	Novel	6.94076e-05	OG0002388
AT1G45015	Atrichoblast2	Novel	6.91634e-05	OG0004134
AT5G04800	Atrichoblast2	Novel	6.84527e-05	OG0001913
AT1G05530	Atrichoblast2	Novel	6.61962e-05	OG0000045
AT4G25630	Atrichoblast2	Novel	6.58055e-05	OG0003640
AT1G73940	Atrichoblast2	Novel	6.21935e-05	OG0014655
AT3G54770	Atrichoblast2	Novel	6.21867e-05	OG0008741
AT1G14080	Atrichoblast2	Novel	6.15247e-05	OG0000576
AT3G04630	Atrichoblast2	Novel	6.08177e-05	OG0001155
AT1G54690	Atrichoblast2	Novel	6.03565e-05	OG0002315
AT5G18790	Atrichoblast2	Novel	6.00457e-05	OG0006435
AT2G43880	Atrichoblast2	Novel	5.97065e-05	OG0011463
AT2G44740	Atrichoblast2	Novel	5.9411e-05	OG0005947
AT4G01240	Atrichoblast2	Novel	5.80667e-05	OG0018557
AT4G17720	Atrichoblast2	Novel	5.80633e-05	OG0002736
AT1G57860	Atrichoblast2	Novel	5.67531e-05	OG0001290
AT3G58700	Atrichoblast2	Novel	5.64151e-05	OG0000746
AT3G17300	Atrichoblast2	Novel	5.55228e-05	OG0008699
AT3G55170	Atrichoblast2	Novel	5.52721e-05	OG0002539
AT4G25250	Atrichoblast2	Novel	5.49913e-05	OG0018527
AT4G28360	Atrichoblast2	Novel	5.33489e-05	OG0004274
AT1G20430	Atrichoblast2	Novel	5.30235e-05	OG0011145
AT2G39960	Atrichoblast2	Novel	5.30155e-05	OG0002515
AT2G21250	Atrichoblast2	Novel	5.2569e-05	OG0005991
AT1G48230	Atrichoblast2	Novel	5.22689e-05	OG0003196
AT5G48760	Atrichoblast2	Novel	5.2111e-05	OG0002612
AT3G43720	Atrichoblast2	Novel	5.18182e-05	OG0003365
AT1G49600	Atrichoblast2	Novel	5.14997e-05	OG0001022
AT3G56070	Atrichoblast2	Novel	5.14803e-05	OG0018424
AT1G31950	Atrichoblast2	Novel	5.07621e-05	OG0000204
AT1G76400	Atrichoblast2	Novel	4.98688e-05	OG0005787
AT2G22121	Atrichoblast2	Novel	4.8541e-05	OG0002578
AT3G52960	Atrichoblast2	Novel	4.84367e-05	OG0006365
AT2G36050	Atrichoblast2	Novel	4.83928e-05	OG0014812
AT2G12646	Atrichoblast2	Novel	4.73796e-05	OG0008473
AT1G48330	Atrichoblast2	Novel	4.65103e-05	OG0004331
AT5G18170	Atrichoblast2	Novel	4.57575e-05	OG0001538
AT1G05660	Atrichoblast2	Novel	4.46361e-05	OG0000278
AT3G57930	Atrichoblast2	Novel	4.37724e-05	OG0000600
AT4G16141	Atrichoblast2	Novel	4.31026e-05	OG0018402
AT1G48920	Atrichoblast2	Novel	4.29052e-05	OG0001395
AT3G13650	Atrichoblast2	Novel	4.27575e-05	OG0007716
AT2G29670	Atrichoblast2	Novel	4.26838e-05	OG0001027
AT5G22140	Atrichoblast2	Novel	4.24013e-05	OG0002637
AT5G42860	Atrichoblast2	Novel	4.22257e-05	OG0004347
AT3G23830	Atrichoblast2	Novel	4.22055e-05	OG0002605
AT5G27120	Atrichoblast2	Novel	4.19597e-05	OG0002669
AT5G11640	Atrichoblast2	Novel	4.14255e-05	OG0012811
AT2G35960	Atrichoblast2	Novel	4.12294e-05	OG0004539
AT1G20580	Atrichoblast2	Novel	4.11468e-05	OG0001426
AT3G50640	Atrichoblast2	Novel	4.0572e-05	OG0001164
AT4G27950	Atrichoblast2	Novel	4.01009e-05	OG0009278
AT5G44585	Atrichoblast2	Novel	3.98836e-05	OG0006800
AT1G63660	Atrichoblast2	Novel	3.97529e-05	OG0010630
AT1G21310	Cortex	Novel	0.00465271	OG0007530
AT2G45180	Cortex	Novel	0.00319654	OG0014804
AT5G42250	Cortex	Novel	0.00290369	OG0006893
AT1G12090	Cortex	Novel	0.0026097	OG0000499
AT4G30170	Cortex	Novel	0.00202761	OG0000509
AT1G06640	Cortex	Novel	0.00197828	OG0000037
AT5G13930	Cortex	Novel	0.00194385	OG0003697
AT2G29750	Cortex	Novel	0.00191438	OG0001026
AT5G47990	Cortex	Novel	0.00180955	OG0000176
AT1G58360	Cortex	Novel	0.00147451	OG0001804
AT3G51240	Cortex	Novel	0.00139018	OG0012080
AT3G29035	Cortex	Novel	0.00133592	OG0000378
AT5G65380	Cortex	Novel	0.00126702	OG0005034
AT2G06850	Cortex	Novel	0.00126378	OG0008132
AT3G44310	Cortex	Novel	0.00119785	OG0014935
AT5G64620	Cortex	Novel	0.00116603	OG0002810
AT4G12880	Cortex	Novel	0.00110909	OG0005920
AT5G48000	Cortex	Novel	0.00108771	OG0001678
AT1G62510	Cortex	Novel	0.00107769	OG0000499
AT3G26590	Cortex	Novel	0.00099172	OG0000686
AT3G48000	Cortex	Novel	0.0009693	OG0002279
AT5G38550	Cortex	Novel	0.000943595	OG0000083
AT1G29025	Cortex	Novel	0.000918368	OG0010562
AT5G42590	Cortex	Novel	0.000917225	OG0000084
AT1G13930	Cortex	Novel	0.000915374	OG0005632
AT1G19450	Cortex	Novel	0.000867278	OG0002949
AT2G06925	Cortex	Novel	0.000850649	OG0008136
AT5G19520	Cortex	Novel	0.000814127	OG0006759
AT5G24410	Cortex	Novel	0.000789033	OG0014898
AT1G75780	Cortex	Novel	0.000780796	OG0000101
AT2G34070	Cortex	Novel	0.000774269	OG0001348
AT5G11420	Cortex	Novel	0.000687199	OG0001729
AT1G20190	Cortex	Novel	0.000675677	OG0002396
AT4G23400	Cortex	Novel	0.000664058	OG0000416
AT2G42570	Cortex	Novel	0.000613134	OG0001348
AT2G43535	Cortex	Novel	0.000609258	OG0005835
AT2G25810	Cortex	Novel	0.000601768	OG0011518
AT5G25460	Cortex	Novel	0.000564593	OG0001729
AT3G14850	Cortex	Novel	0.000536266	OG0014929
AT3G52920	Cortex	Novel	0.00048806	OG0001148
AT1G76090	Cortex	Novel	0.000484994	OG0003987
AT1G55360	Cortex	Novel	0.000462754	OG0001075
AT2G06255	Cortex	Novel	0.000454836	OG0004230
AT1G20010	Cortex	Novel	0.000447648	OG0000101
AT5G36160	Cortex	Novel	0.000431912	OG0004985
AT3G12700	Cortex	Novel	0.000426851	OG0001943
AT3G11210	Cortex	Novel	0.000410451	OG0008704
AT5G35630	Cortex	Novel	0.000402307	OG0009519
AT4G25830	Cortex	Novel	0.00037799	OG0004908
AT5G18840	Cortex	Novel	0.000376263	OG0004392
AT4G33150	Cortex	Novel	0.000369165	OG0009251
AT2G38300	Cortex	Novel	0.000345294	OG0000823
AT4G25260	Cortex	Novel	0.000338286	OG0000480
AT4G04830	Cortex	Novel	0.000326652	OG0006698
AT5G08640	Cortex	Novel	0.000316542	OG0002056
AT3G48340	Cortex	Novel	0.000311423	OG0000926
AT3G25770	Cortex	Novel	0.000300041	OG0002232
AT1G77920	Cortex	Novel	0.00028964	OG0001058
AT1G03870	Cortex	Novel	0.000250925	OG0002400
AT3G28740	Cortex	Novel	0.000248978	OG0000135
AT2G02780	Cortex	Novel	0.000227828	OG0007818
AT1G47480	Cortex	Novel	0.000223442	OG0000811
AT5G53370	Cortex	Novel	0.00021761	OG0006307
AT3G12610	Cortex	Novel	0.000206943	OG0004717
AT1G70370	Cortex	Novel	0.000203055	OG0000824
AT5G05270	Cortex	Novel	0.00019026	OG0009752
AT1G07985	Cortex	Novel	0.000186228	OG0007788
AT5G26660	Cortex	Novel	0.000186087	OG0009445
AT3G57020	Cortex	Novel	0.000184302	OG0000495
AT3G11260	Cortex	Novel	0.000182477	OG0000123
AT5G10770	Cortex	Novel	0.000158813	OG0005010
AT1G51680	Cortex	Novel	0.000157223	OG0000708
AT5G16010	Cortex	Novel	0.000155321	OG0003695
AT4G18360	Cortex	Novel	0.000153842	OG0000767
AT3G18830	Cortex	Novel	0.00015169	OG0006369
AT1G05680	Cortex	Novel	0.000149295	OG0011208
AT5G12940	Cortex	Novel	0.000145625	OG0004717
AT4G21440	Cortex	Novel	0.000142371	OG0012248
AT1G79040	Cortex	Novel	0.000142189	OG0007967
AT4G24110	Cortex	Novel	0.000141457	OG0018573
AT4G29270	Cortex	Novel	0.000140509	OG0004911
AT2G03760	Cortex	Novel	0.000134642	OG0000049
AT1G11670	Cortex	Novel	0.000133182	OG0017870
AT5G49360	Cortex	Novel	0.00013051	OG0004276
AT5G64330	Cortex	Novel	0.00012195	OG0009753
AT3G21240	Cortex	Novel	0.000118973	OG0000708
AT3G24420	Cortex	Novel	0.000116336	OG0012143
AT5G03150	Cortex	Novel	0.000115624	OG0009512
AT2G46930	Cortex	Novel	0.000113321	OG0008130
AT5G15150	Cortex	Novel	0.000112933	OG0012165
AT1G05710	Cortex	Novel	0.000108633	OG0008019
AT2G25735	Cortex	Novel	0.00010733	OG0002532
AT4G12510	Cortex	Novel	0.000106162	OG0000499
AT1G51420	Cortex	Novel	0.000103078	OG0003081
AT3G16450	Cortex	Novel	0.00010284	OG0000083
AT3G53750	Cortex	Novel	0.000100417	OG0000071
AT5G14340	Cortex	Novel	9.99909e-05	OG0000321
AT5G59510	Cortex	Novel	9.69678e-05	OG0018444
AT2G24150	Cortex	Novel	9.49834e-05	OG0001879
AT1G33590	Cortex	Novel	9.08282e-05	OG0003075
AT2G02990	Cortex	Novel	9.08113e-05	OG0004104
AT1G05575	Cortex	Novel	8.78522e-05	OG0001042
AT1G33600	Cortex	Novel	8.63462e-05	OG0003075
AT3G20110	Cortex	Novel	8.47252e-05	OG0000176
AT5G02270	Cortex	Novel	8.26661e-05	OG0013293
AT1G23060	Cortex	Novel	7.97004e-05	OG0014462
AT2G48020	Cortex	Novel	7.73032e-05	OG0004392
AT1G14240	Cortex	Novel	7.56862e-05	OG0001070
AT1G08500	Cortex	Novel	7.46016e-05	OG0010934
AT3G22750	Cortex	Novel	7.31206e-05	OG0006434
AT1G31330	Cortex	Novel	7.15731e-05	OG0002324
AT3G25760	Cortex	Novel	7.12049e-05	OG0002232
AT3G20100	Cortex	Novel	6.97172e-05	OG0000176
AT1G12240	Cortex	Novel	6.64829e-05	OG0003010
AT5G60200	Cortex	Novel	6.47401e-05	OG0000571
AT1G37130	Cortex	Novel	6.44389e-05	OG0002231
AT3G13610	Cortex	Novel	6.41091e-05	OG0007858
AT5G03760	Cortex	Novel	6.3883e-05	OG0000703
AT1G33110	Cortex	Novel	6.25998e-05	OG0000588
AT1G76650	Cortex	Novel	6.10194e-05	OG0000871
AT1G44608	Cortex	Novel	5.93012e-05	OG0002992
AT4G32460	Cortex	Novel	5.88222e-05	OG0001729
AT4G28750	Cortex	Novel	5.85388e-05	OG0004424
AT1G04490	Cortex	Novel	5.8205e-05	OG0005462
AT1G09750	Cortex	Novel	5.79014e-05	OG0007421
AT2G34810	Cortex	Novel	5.66785e-05	OG0007893
AT2G47400	Cortex	Novel	5.61074e-05	OG0004452
AT5G63600	Cortex	Novel	5.58929e-05	OG0002056
AT5G59540	Cortex	Novel	5.49906e-05	OG0000037
AT4G29905	Cortex	Novel	5.35165e-05	OG0000782
AT2G43290	Cortex	Novel	5.16359e-05	OG0014756
AT5G27930	Cortex	Novel	5.10354e-05	OG0006311
AT1G56580	Cortex	Novel	5.02371e-05	OG0002993
AT3G18200	Cortex	Novel	5.00176e-05	OG0006248
AT3G15115	Cortex	Novel	4.83489e-05	OG0014517
AT4G14550	Cortex	Novel	4.81308e-05	OG0000838
AT1G72210	Cortex	Novel	4.81163e-05	OG0004220
AT5G01220	Cortex	Novel	4.76444e-05	OG0002075
AT1G20340	Cortex	Novel	4.61414e-05	OG0005410
AT1G02850	Cortex	Novel	4.48264e-05	OG0001101
AT2G38170	Cortex	Novel	4.36163e-05	OG0003400
AT4G21500	Cortex	Novel	4.29192e-05	OG0015054
AT1G70720	Cortex	Novel	4.25316e-05	OG0017730
AT1G08880	Cortex	Novel	4.17274e-05	OG0002315
AT5G07190	Cortex	Novel	4.13537e-05	OG0015183
AT3G52480	Cortex	Novel	4.12112e-05	OG0018312
AT2G46280	Cortex	Novel	4.1026e-05	OG0003298
AT4G25100	Cortex	Novel	4.03635e-05	OG0002725
AT3G24750	Cortex	Novel	3.92917e-05	OG0014910
AT4G12520	Cortex	Novel	3.83916e-05	OG0000499
AT3G07010	Cortex	Novel	3.80634e-05	OG0000589
AT4G02520	Cortex	Novel	3.73617e-05	OG0001351
AT2G16980	Cortex	Novel	3.72024e-05	OG0000741
AT3G11400	Cortex	Novel	3.67771e-05	OG0008955
AT1G28130	Cortex	Novel	3.63904e-05	OG0003074
AT5G09440	Cortex	Novel	3.59054e-05	OG0005115
AT3G21670	Cortex	Novel	3.34021e-05	OG0006444
AT5G17810	Cortex	Novel	3.29679e-05	OG0002695
AT3G61660	Cortex	Novel	3.21425e-05	OG0011513
AT1G79720	Cortex	Novel	3.20003e-05	OG0007934
AT5G62680	Cortex	Novel	3.07994e-05	OG0001366
AT4G22300	Cortex	Novel	3.07276e-05	OG0001838
AT3G45780	Cortex	Novel	3.06422e-05	OG0004656
AT1G72450	Cortex	Novel	3.01751e-05	OG0017686
AT3G48510	Cortex	Novel	3.01663e-05	OG0001533
AT3G55120	Cortex	Novel	2.98444e-05	OG0003438
AT4G27657	Cortex	Novel	2.95828e-05	OG0012480
AT4G12440	Cortex	Novel	2.8985e-05	OG0002277
AT4G28840	Cortex	Novel	2.86665e-05	OG0002506
AT5G66570	Cortex	Novel	2.84911e-05	OG0004820
AT5G01330	Cortex	Novel	2.74045e-05	OG0000522
AT5G25110	Cortex	Novel	2.71981e-05	OG0002090
AT2G39130	Cortex	Novel	2.69818e-05	OG0000892
AT4G30420	Cortex	Novel	2.67408e-05	OG0009050
AT4G30410	Cortex	Novel	2.62053e-05	OG0001565
AT2G22770	Cortex	Novel	2.58369e-05	OG0018071
AT1G14220	Cortex	Novel	2.56933e-05	OG0004104
AT1G22230	Cortex	Novel	2.56682e-05	OG0004150
AT4G21780	Cortex	Novel	2.54547e-05	OG0012463
AT3G60220	Cortex	Novel	2.53359e-05	OG0006323
AT3G46030	Cortex	Novel	2.49889e-05	OG0000133
AT3G22235	Cortex	Novel	2.45612e-05	OG0001354
AT1G05870	Cortex	Novel	2.41336e-05	OG0004305
AT2G31945	Cortex	Novel	2.40595e-05	OG0001042
AT1G25260	Cortex	Novel	2.39445e-05	OG0004144
AT5G02170	Cortex	Novel	2.36449e-05	OG0006409
AT5G17860	Cortex	Novel	2.30488e-05	OG0003716
AT1G07820	Cortex	Novel	2.27871e-05	OG0000056
AT2G24300	Cortex	Novel	2.22714e-05	OG0018144
AT3G26770	Cortex	Novel	2.22377e-05	OG0001988
AT3G06360	Cortex	Novel	2.18846e-05	OG0004485
AT3G55290	Cortex	Novel	2.14996e-05	OG0001712
AT3G58120	Cortex	Novel	2.114e-05	OG0001490
AT1G08580	Cortex	Novel	2.10425e-05	OG0010941
AT3G59740	Cortex	Novel	2.09138e-05	OG0001770
AT3G51800	Cortex	Novel	2.08181e-05	OG0006500
AT1G72900	Cortex	Novel	2.06231e-05	OG0000693
AT4G28040	Cortex	Novel	1.99135e-05	OG0009050
AT1G23090	Cortex	Novel	1.98333e-05	OG0007672
AT2G38470	Cortex	Novel	1.96117e-05	OG0002541
AT3G55230	Endodermis	Novel	0.00454925	OG0005923
AT2G36100	Endodermis	Novel	0.00402401	OG0006036
AT2G40113	Endodermis	Novel	0.00373696	OG0003312
AT4G13580	Endodermis	Novel	0.00368274	OG0004727
AT2G28670	Endodermis	Novel	0.00354398	OG0003143
AT3G24020	Endodermis	Novel	0.00354285	OG0004727
AT5G42180	Endodermis	Novel	0.00284078	OG0001585
AT5G66390	Endodermis	Novel	0.00257963	OG0015206
AT2G30210	Endodermis	Novel	0.00241002	OG0008354
AT3G11550	Endodermis	Novel	0.00221374	OG0006036
AT1G61590	Endodermis	Novel	0.00206777	OG0005634
AT1G71740	Endodermis	Novel	0.00195136	OG0014700
AT2G34310	Endodermis	Novel	0.00150985	OG0014503
AT4G02090	Endodermis	Novel	0.00132563	OG0009307
AT1G03920	Endodermis	Novel	0.00122014	OG0001092
AT2G47630	Endodermis	Novel	0.00112061	OG0005959
AT5G65530	Endodermis	Novel	0.00110091	OG0002788
AT1G44970	Endodermis	Novel	0.00106279	OG0007683
AT5G15290	Endodermis	Novel	0.000969108	OG0005119
AT2G38800	Endodermis	Novel	0.000906222	OG0001133
AT2G39430	Endodermis	Novel	0.000890481	OG0005923
AT4G19880	Endodermis	Novel	0.000824692	OG0000301
AT4G02830	Endodermis	Novel	0.000733506	OG0001555
AT3G52790	Endodermis	Novel	0.00070219	OG0018437
AT5G23920	Endodermis	Novel	0.00068286	OG0006825
AT4G17215	Endodermis	Novel	0.000659459	OG0003312
AT1G49580	Endodermis	Novel	0.000648909	OG0001313
AT3G21710	Endodermis	Novel	0.00059724	OG0004832
AT2G27370	Endodermis	Novel	0.000535634	OG0006036
AT4G35100	Endodermis	Novel	0.000508898	OG0018590
AT5G06200	Endodermis	Novel	0.000450307	OG0006036
AT4G10500	Endodermis	Novel	0.000307622	OG0012531
AT5G63590	Endodermis	Novel	0.000287422	OG0002056
AT3G14280	Endodermis	Novel	0.000263771	OG0001938
AT5G42030	Endodermis	Novel	0.000253804	OG0003428
AT5G16770	Endodermis	Novel	0.000250889	OG0000874
AT4G17483	Endodermis	Novel	0.000228391	OG0006640
AT5G28646	Endodermis	Novel	0.000218015	OG0001155
AT4G15330	Endodermis	Novel	0.000214132	OG0000176
AT4G00430	Endodermis	Novel	0.000210257	OG0000416
AT4G22610	Endodermis	Novel	0.000209059	OG0012256
AT4G26140	Endodermis	Novel	0.000202155	OG0006472
AT5G10430	Endodermis	Novel	0.000195005	OG0011617
AT1G08320	Endodermis	Novel	0.000186642	OG0014576
AT1G16510	Endodermis	Novel	0.0001769	OG0001714
AT5G39320	Endodermis	Novel	0.000171818	OG0000569
AT1G60680	Endodermis	Novel	0.000162731	OG0001008
AT3G05937	Endodermis	Novel	0.000132725	OG0018326
AT3G53260	Endodermis	Novel	0.000132425	OG0000756
AT5G23810	Endodermis	Novel	0.000128972	OG0006977
AT3G60690	Endodermis	Novel	0.000126719	OG0001889
AT5G42655	Endodermis	Novel	0.000123593	OG0015247
AT1G18100	Endodermis	Novel	0.000119152	OG0004126
AT1G60010	Endodermis	Novel	0.000103184	OG0000407
AT2G26690	Endodermis	Novel	9.95311e-05	OG0008185
AT1G20380	Endodermis	Novel	9.86889e-05	OG0005418
AT3G04320	Endodermis	Novel	9.64454e-05	OG0018275
AT4G35160	Endodermis	Novel	9.57975e-05	OG0000028
AT1G65690	Endodermis	Novel	9.28884e-05	OG0000819
AT2G28110	Endodermis	Novel	9.16753e-05	OG0003374
AT3G55390	Endodermis	Novel	9.16515e-05	OG0012085
AT1G26960	Endodermis	Novel	8.28138e-05	OG0002258
AT3G14440	Endodermis	Novel	8.26036e-05	OG0000862
AT1G61820	Endodermis	Novel	8.23001e-05	OG0000494
AT4G21340	Endodermis	Novel	8.11833e-05	OG0018463
AT4G29930	Endodermis	Novel	7.97203e-05	OG0004960
AT2G22620	Endodermis	Novel	7.89001e-05	OG0000410
AT4G20140	Endodermis	Novel	7.83779e-05	OG0006646
AT1G23120	Endodermis	Novel	7.68884e-05	OG0000678
AT5G51680	Endodermis	Novel	7.37842e-05	OG0015208
AT2G28510	Endodermis	Novel	7.30281e-05	OG0000571
AT2G28305	Endodermis	Novel	7.22857e-05	OG0000428
AT1G66760	Endodermis	Novel	7.21318e-05	OG0014583
AT1G76640	Endodermis	Novel	6.36634e-05	OG0000871
AT3G56620	Endodermis	Novel	6.31871e-05	OG0018061
AT3G09270	Endodermis	Novel	5.85708e-05	OG0000115
AT1G68500	Endodermis	Novel	5.63598e-05	OG0014678
AT5G67210	Endodermis	Novel	5.20598e-05	OG0000629
AT5G66400	Endodermis	Novel	5.18491e-05	OG0002678
AT2G44480	Endodermis	Novel	4.68351e-05	OG0000261
AT5G19190	Endodermis	Novel	4.55375e-05	OG0008530
AT3G61820	Endodermis	Novel	4.49646e-05	OG0002391
AT1G43020	Endodermis	Novel	4.42067e-05	OG0002967
AT4G33420	Endodermis	Novel	4.02906e-05	OG0012584
AT1G13830	Endodermis	Novel	4.00478e-05	OG0007745
AT1G34750	Endodermis	Novel	3.92209e-05	OG0004299
AT4G24130	Endodermis	Novel	3.57761e-05	OG0000116
AT5G50760	Endodermis	Novel	3.55601e-05	OG0006968
AT2G15300	Endodermis	Novel	3.2038e-05	OG0018127
AT1G03700	Endodermis	Novel	3.15831e-05	OG0005802
AT1G09950	Endodermis	Novel	3.10674e-05	OG0002284
AT5G67340	Endodermis	Novel	3.06756e-05	OG0004477
AT4G14940	Endodermis	Novel	2.9509e-05	OG0012270
AT4G30980	Endodermis	Novel	2.94836e-05	OG0004515
AT1G19350	Endodermis	Novel	2.62537e-05	OG0010556
AT5G10520	Endodermis	Novel	2.44706e-05	OG0002788
AT5G66490	Endodermis	Novel	2.34036e-05	OG0008168
AT1G01120	Endodermis	Novel	2.1543e-05	OG0004266
AT4G30220	Endodermis	Novel	2.12287e-05	OG0012629
AT4G19920	Endodermis	Novel	2.09446e-05	OG0000172
AT1G80820	Endodermis	Novel	1.99308e-05	OG0001294
AT3G45080	Endodermis	Novel	1.78285e-05	OG0000049
AT5G64680	Endodermis	Novel	1.66124e-05	OG0007008
AT1G15415	Endodermis	Novel	1.5721e-05	OG0004219
AT1G73640	Endodermis	Novel	1.54647e-05	OG0014548
AT5G10280	Endodermis	Novel	1.48645e-05	OG0000874
AT5G08330	Endodermis	Novel	1.45722e-05	OG0004980
AT3G23550	Endodermis	Novel	1.39826e-05	OG0001189
AT3G15990	Endodermis	Novel	1.39595e-05	OG0011842
AT1G34430	Endodermis	Novel	1.39275e-05	OG0010725
AT2G05940	Endodermis	Novel	1.37528e-05	OG0003386
AT1G23280	Endodermis	Novel	1.33529e-05	OG0004043
AT5G23870	Endodermis	Novel	1.30882e-05	OG0013240
AT3G16530	Endodermis	Novel	1.30601e-05	OG0005469
AT4G31360	Endodermis	Novel	1.26959e-05	OG0006087
AT5G44920	Endodermis	Novel	1.20169e-05	OG0000172
AT3G13470	Endodermis	Novel	1.13746e-05	OG0000587
AT4G39720	Endodermis	Novel	1.08737e-05	OG0000772
AT5G27820	Endodermis	Novel	1.08339e-05	OG0006851
AT4G25200	Endodermis	Novel	1.07983e-05	OG0009153
AT2G43510	Endodermis	Novel	1.06151e-05	OG0005835
AT2G27775	Endodermis	Novel	1.04619e-05	OG0006123
AT1G22110	Endodermis	Novel	9.95712e-06	OG0011058
AT3G22840	Endodermis	Novel	9.49741e-06	OG0002589
AT1G11240	Endodermis	Novel	9.42955e-06	OG0014534
AT3G17130	Endodermis	Novel	9.06579e-06	OG0003990
AT5G60990	Endodermis	Novel	8.91054e-06	OG0006965
AT3G07430	Endodermis	Novel	8.78168e-06	OG0008653
AT3G59880	Endodermis	Novel	8.18829e-06	OG0014823
AT4G05180	Endodermis	Novel	8.07325e-06	OG0004858
AT4G05170	Endodermis	Novel	7.93393e-06	OG0018463
AT4G13100	Endodermis	Novel	7.45692e-06	OG0014902
AT2G21100	Endodermis	Novel	7.25075e-06	OG0018052
AT4G09810	Endodermis	Novel	6.63024e-06	OG0002347
AT1G72310	Endodermis	Novel	6.23254e-06	OG0003009
AT5G52790	Endodermis	Novel	5.69e-06	OG0000713
AT2G28710	Endodermis	Novel	5.24367e-06	OG0006077
AT3G02120	Endodermis	Novel	5.14463e-06	OG0018387
AT4G11320	Endodermis	Novel	4.89567e-06	OG0015043
AT5G15830	Endodermis	Novel	4.74869e-06	OG0001317
AT5G07340	Endodermis	Novel	4.70671e-06	OG0003694
AT1G54540	Endodermis	Novel	4.6885e-06	OG0000819
AT1G33055	Endodermis	Novel	4.47766e-06	OG0014686
AT3G59480	Endodermis	Novel	4.41692e-06	OG0002401
AT5G12420	Endodermis	Novel	4.20624e-06	OG0000481
AT4G18650	Endodermis	Novel	4.17977e-06	OG0002284
AT5G61600	Endodermis	Novel	3.9097e-06	OG0003713
AT1G11190	Endodermis	Novel	3.61528e-06	OG0010770
AT5G11630	Endodermis	Novel	3.54985e-06	OG0009506
AT1G54740	Endodermis	Novel	3.50802e-06	OG0017849
AT1G13600	Endodermis	Novel	3.30059e-06	OG0017865
AT5G06610	Endodermis	Novel	3.26454e-06	OG0009375
AT1G80130	Endodermis	Novel	3.02145e-06	OG0002269
AT5G24380	Endodermis	Novel	2.89954e-06	OG0002800
AT3G12860	Endodermis	Novel	2.8301e-06	OG0003049
AT3G11050	Endodermis	Novel	2.79553e-06	OG0003337
AT4G16820	Endodermis	Novel	2.63817e-06	OG0002747
AT3G51600	Endodermis	Novel	2.61275e-06	OG0000088
AT5G65350	Endodermis	Novel	2.60366e-06	OG0000062
AT2G39700	Endodermis	Novel	2.58485e-06	OG0001441
AT1G20610	Endodermis	Novel	2.39548e-06	OG0000322
AT2G27300	Endodermis	Novel	2.29149e-06	OG0014853
AT1G08440	Endodermis	Novel	2.08458e-06	OG0007730
AT1G64405	Endodermis	Novel	1.88016e-06	OG0004222
AT1G78470	Endodermis	Novel	1.66457e-06	OG0005561
AT2G47810	Endodermis	Novel	1.51157e-06	OG0004500
AT1G77145	Endodermis	Novel	1.50351e-06	OG0007611
AT5G59810	Endodermis	Novel	1.15979e-06	OG0001894
AT1G27461	Endodermis	Novel	1.11553e-06	OG0005852
AT5G07475	Endodermis	Novel	1.0757e-06	OG0012937
AT3G50480	Endodermis	Novel	8.94862e-07	OG0008528
AT5G27330	Endodermis	Novel	7.19061e-07	OG0014993
AT1G34670	Endodermis	Novel	6.55371e-07	OG0000874
AT5G15800	Endodermis	Novel	5.4676e-07	OG0004494
AT1G04220	Endodermis	Novel	5.46316e-07	OG0017980
AT5G24655	Endodermis	Novel	4.62363e-07	OG0000765
AT5G22190	Endodermis	Novel	4.29821e-07	OG0004619
AT2G33720	Endodermis	Novel	3.81961e-07	OG0003149
AT3G22231	Endodermis	Novel	3.53038e-07	OG0001354
AT4G17000	Endodermis	Novel	3.42062e-07	OG0001196
AT3G06390	Endodermis	Novel	2.60931e-07	OG0006439
AT1G05260	Meristem_Endocortex	Novel	0.0134962	OG0000492
AT2G14900	Meristem_Endocortex	Novel	0.0132605	OG0001100
AT3G32980	Meristem_Endocortex	Novel	0.0124651	OG0004523
AT4G11290	Meristem_Endocortex	Novel	0.00973647	OG0000492
AT5G57620	Meristem_Endocortex	Novel	0.00847339	OG0001501
AT4G22110	Meristem_Endocortex	Novel	0.00802447	OG0007691
AT5G28020	Meristem_Endocortex	Novel	0.00791954	OG0014968
AT3G22600	Meristem_Endocortex	Novel	0.00678615	OG0000426
AT1G13420	Meristem_Endocortex	Novel	0.00641234	OG0000049
AT3G17820	Meristem_Endocortex	Novel	0.00533481	OG0000500
AT3G04520	Meristem_Endocortex	Novel	0.00502986	OG0003117
AT3G11660	Meristem_Endocortex	Novel	0.00463796	OG0004539
AT4G16447	Meristem_Endocortex	Novel	0.00410195	OG0018462
AT3G22620	Meristem_Endocortex	Novel	0.00409574	OG0001760
AT4G05100	Meristem_Endocortex	Novel	0.00371534	OG0012248
AT1G70670	Meristem_Endocortex	Novel	0.00291827	OG0001315
AT1G17300	Meristem_Endocortex	Novel	0.00266039	OG0014482
AT1G09090	Meristem_Endocortex	Novel	0.00238075	OG0005452
AT1G72940	Meristem_Endocortex	Novel	0.00231078	OG0000693
AT1G14580	Meristem_Endocortex	Novel	0.00178933	OG0000476
AT4G11190	Meristem_Endocortex	Novel	0.00160985	OG0001069
AT4G29700	Meristem_Endocortex	Novel	0.00156049	OG0015116
AT1G69930	Meristem_Endocortex	Novel	0.00141885	OG0010699
AT2G29980	Meristem_Endocortex	Novel	0.00140745	OG0004547
AT3G09390	Meristem_Endocortex	Novel	0.00114878	OG0004805
AT3G45070	Meristem_Endocortex	Novel	0.00114521	OG0000049
AT1G69490	Meristem_Endocortex	Novel	0.00113148	OG0007731
AT5G46890	Meristem_Endocortex	Novel	0.00112147	OG0003760
AT5G64570	Meristem_Endocortex	Novel	0.000907831	OG0006921
AT5G59590	Meristem_Endocortex	Novel	0.000889407	OG0000754
AT3G59620	Meristem_Endocortex	Novel	0.000786872	OG0005837
AT3G22240	Meristem_Endocortex	Novel	0.000760166	OG0001354
AT5G65790	Meristem_Endocortex	Novel	0.000756089	OG0001501
AT3G26760	Meristem_Endocortex	Novel	0.000749907	OG0001988
AT2G16700	Meristem_Endocortex	Novel	0.000748222	OG0008305
AT1G02900	Meristem_Endocortex	Novel	0.000714965	OG0002297
AT2G37180	Meristem_Endocortex	Novel	0.000707072	OG0000292
AT5G04120	Meristem_Endocortex	Novel	0.000676046	OG0008533
AT5G42500	Meristem_Endocortex	Novel	0.000666763	OG0007464
AT5G46900	Meristem_Endocortex	Novel	0.000650974	OG0003760
AT5G36180	Meristem_Endocortex	Novel	0.0006392	OG0000098
AT1G35260	Meristem_Endocortex	Novel	0.000582921	OG0000813
AT5G20820	Meristem_Endocortex	Novel	0.000582026	OG0001233
AT1G63180	Meristem_Endocortex	Novel	0.000572479	OG0005443
AT5G24580	Meristem_Endocortex	Novel	0.000567947	OG0013037
AT4G32710	Meristem_Endocortex	Novel	0.000491404	OG0001085
AT5G07830	Meristem_Endocortex	Novel	0.000489719	OG0002061
AT2G16750	Meristem_Endocortex	Novel	0.000482005	OG0006005
AT3G14310	Meristem_Endocortex	Novel	0.000463732	OG0002252
AT1G25230	Meristem_Endocortex	Novel	0.000460638	OG0003007
AT4G08770	Meristem_Endocortex	Novel	0.000457739	OG0004523
AT5G18680	Meristem_Endocortex	Novel	0.000453556	OG0018399
AT2G48030	Meristem_Endocortex	Novel	0.00044431	OG0005916
AT3G25290	Meristem_Endocortex	Novel	0.000420586	OG0000774
AT2G33530	Meristem_Endocortex	Novel	0.000391446	OG0001747
AT3G44870	Meristem_Endocortex	Novel	0.000336882	OG0001818
AT5G38790	Meristem_Endocortex	Novel	0.000314733	OG0004818
AT5G07010	Meristem_Endocortex	Novel	0.000306469	OG0000049
AT3G06778	Meristem_Endocortex	Novel	0.000284546	OG0012212
AT1G16390	Meristem_Endocortex	Novel	0.000283336	OG0001684
AT4G26320	Meristem_Endocortex	Novel	0.000264196	OG0005714
AT5G41790	Meristem_Endocortex	Novel	0.000259019	OG0014598
AT5G19240	Meristem_Endocortex	Novel	0.000250473	OG0003416
AT1G65890	Meristem_Endocortex	Novel	0.00024346	OG0001296
AT1G11210	Meristem_Endocortex	Novel	0.000235214	OG0007637
AT2G27360	Meristem_Endocortex	Novel	0.000222272	OG0000852
AT1G77885	Meristem_Endocortex	Novel	0.000212337	OG0017826
AT2G47930	Meristem_Endocortex	Novel	0.000196974	OG0004485
AT5G49800	Meristem_Endocortex	Novel	0.000185104	OG0012909
AT5G37540	Meristem_Endocortex	Novel	0.000182852	OG0010743
AT3G49360	Meristem_Endocortex	Novel	0.000182749	OG0014898
AT3G44320	Meristem_Endocortex	Novel	0.000181257	OG0014935
AT3G61890	Meristem_Endocortex	Novel	0.000178256	OG0003387
AT4G17340	Meristem_Endocortex	Novel	0.000173181	OG0000929
AT5G63595	Meristem_Endocortex	Novel	0.00017191	OG0002056
AT1G23800	Meristem_Endocortex	Novel	0.000165968	OG0002279
AT2G23560	Meristem_Endocortex	Novel	0.000162895	OG0000178
AT2G31750	Meristem_Endocortex	Novel	0.000161097	OG0011208
AT5G47240	Meristem_Endocortex	Novel	0.000159836	OG0009440
AT1G22740	Meristem_Endocortex	Novel	0.000153317	OG0004068
AT5G61130	Meristem_Endocortex	Novel	0.000152773	OG0001068
AT2G44490	Meristem_Endocortex	Novel	0.000137039	OG0001305
AT5G18690	Meristem_Endocortex	Novel	0.000127409	OG0004485
AT3G54400	Meristem_Endocortex	Novel	0.000126842	OG0008751
AT3G56230	Meristem_Endocortex	Novel	0.000120469	OG0003158
AT1G04040	Meristem_Endocortex	Novel	0.000120031	OG0014670
AT3G63210	Meristem_Endocortex	Novel	0.000104602	OG0003504
AT1G65900	Meristem_Endocortex	Novel	0.000102308	OG0014459
AT5G48540	Meristem_Endocortex	Novel	0.000101534	OG0002770
AT1G22490	Meristem_Endocortex	Novel	9.77379e-05	OG0004220
AT1G59940	Meristem_Endocortex	Novel	9.56682e-05	OG0014518
AT4G31800	Meristem_Endocortex	Novel	9.29485e-05	OG0000706
AT5G66580	Meristem_Endocortex	Novel	9.26995e-05	OG0000425
AT5G13910	Meristem_Endocortex	Novel	9.23323e-05	OG0006734
AT2G46680	Meristem_Endocortex	Novel	8.39011e-05	OG0003387
AT5G35670	Meristem_Endocortex	Novel	8.19091e-05	OG0015177
AT4G37300	Meristem_Endocortex	Novel	8.17204e-05	OG0004856
AT5G60580	Meristem_Endocortex	Novel	7.99535e-05	OG0002825
AT4G27760	Meristem_Endocortex	Novel	7.93848e-05	OG0004926
AT4G24780	Meristem_Endocortex	Novel	7.92167e-05	OG0000589
AT1G61795	Meristem_Endocortex	Novel	7.79355e-05	OG0000330
AT1G03790	Meristem_Endocortex	Novel	7.6898e-05	OG0014671
AT2G47550	Meristem_Endocortex	Novel	7.48406e-05	OG0001725
AT2G25150	Meristem_Endocortex	Novel	7.41915e-05	OG0011312
AT2G16720	Meristem_Endocortex	Novel	7.17264e-05	OG0018189
AT1G62975	Meristem_Endocortex	Novel	7.06128e-05	OG0002407
AT2G28650	Meristem_Endocortex	Novel	6.72343e-05	OG0014604
AT2G26190	Meristem_Endocortex	Novel	6.6764e-05	OG0001857
AT5G23400	Meristem_Endocortex	Novel	6.08248e-05	OG0012992
AT1G48480	Meristem_Endocortex	Novel	5.78219e-05	OG0001412
AT1G18880	Meristem_Endocortex	Novel	5.62156e-05	OG0001366
AT3G48350	Meristem_Endocortex	Novel	5.59914e-05	OG0000926
AT5G66040	Meristem_Endocortex	Novel	5.58582e-05	OG0009077
AT3G23730	Meristem_Endocortex	Novel	5.3891e-05	OG0014989
AT4G38400	Meristem_Endocortex	Novel	5.38398e-05	OG0000265
AT2G46600	Meristem_Endocortex	Novel	5.2216e-05	OG0000430
AT5G20270	Meristem_Endocortex	Novel	5.2174e-05	OG0009747
AT2G39980	Meristem_Endocortex	Novel	5.10879e-05	OG0001460
AT1G69920	Meristem_Endocortex	Novel	5.00865e-05	OG0010699
AT4G17220	Meristem_Endocortex	Novel	4.88566e-05	OG0009031
AT2G01420	Meristem_Endocortex	Novel	4.802e-05	OG0007454
AT5G45210	Meristem_Endocortex	Novel	4.69192e-05	OG0002551
AT5G52470	Meristem_Endocortex	Novel	4.52064e-05	OG0003640
AT3G16950	Meristem_Endocortex	Novel	4.48817e-05	OG0006520
AT2G48130	Meristem_Endocortex	Novel	4.36487e-05	OG0000426
AT1G66160	Meristem_Endocortex	Novel	4.31648e-05	OG0000878
AT3G50800	Meristem_Endocortex	Novel	4.3138e-05	OG0000425
AT1G44760	Meristem_Endocortex	Novel	4.19707e-05	OG0004024
AT1G24130	Meristem_Endocortex	Novel	4.19441e-05	OG0000849
AT4G36430	Meristem_Endocortex	Novel	4.01175e-05	OG0014749
AT4G14040	Meristem_Endocortex	Novel	3.93484e-05	OG0009137
AT2G39390	Meristem_Endocortex	Novel	3.90968e-05	OG0002539
AT5G39050	Meristem_Endocortex	Novel	3.74604e-05	OG0001522
AT1G80450	Meristem_Endocortex	Novel	3.7415e-05	OG0014461
AT4G17280	Meristem_Endocortex	Novel	3.7085e-05	OG0012264
AT3G56220	Meristem_Endocortex	Novel	3.67665e-05	OG0003259
AT5G47370	Meristem_Endocortex	Novel	3.54274e-05	OG0000384
AT5G43540	Meristem_Endocortex	Novel	3.40699e-05	OG0003473
AT1G55740	Meristem_Endocortex	Novel	3.39703e-05	OG0004138
AT3G46660	Meristem_Endocortex	Novel	3.27884e-05	OG0000754
AT1G26880	Meristem_Endocortex	Novel	3.1121e-05	OG0001328
AT3G24450	Meristem_Endocortex	Novel	3.0869e-05	OG0006481
AT3G47220	Meristem_Endocortex	Novel	3.06524e-05	OG0018342
AT4G01450	Meristem_Endocortex	Novel	3.02239e-05	OG0000483
AT5G67510	Meristem_Endocortex	Novel	2.97149e-05	OG0002631
AT1G10360	Meristem_Endocortex	Novel	2.96498e-05	OG0001082
AT1G17970	Meristem_Endocortex	Novel	2.9589e-05	OG0002318
AT2G31230	Meristem_Endocortex	Novel	2.88917e-05	OG0017967
AT4G33905	Meristem_Endocortex	Novel	2.83379e-05	OG0003361
AT1G77120	Meristem_Endocortex	Novel	2.76511e-05	OG0005558
AT5G07680	Meristem_Endocortex	Novel	2.73663e-05	OG0000378
AT5G14780	Meristem_Endocortex	Novel	2.72421e-05	OG0003774
AT1G47760	Meristem_Endocortex	Novel	2.72125e-05	OG0017894
AT2G39690	Meristem_Endocortex	Novel	2.71761e-05	OG0006103
AT1G52750	Meristem_Endocortex	Novel	2.64571e-05	OG0004088
AT2G27505	Meristem_Endocortex	Novel	2.52199e-05	OG0000051
AT4G25810	Meristem_Endocortex	Novel	2.50896e-05	OG0002731
AT1G74080	Meristem_Endocortex	Novel	2.47577e-05	OG0017857
AT4G26200	Meristem_Endocortex	Novel	2.46793e-05	OG0009081
AT1G60470	Meristem_Endocortex	Novel	2.4574e-05	OG0017976
AT2G40330	Meristem_Endocortex	Novel	2.34442e-05	OG0000508
AT4G01140	Meristem_Endocortex	Novel	2.33229e-05	OG0004876
AT1G23030	Meristem_Endocortex	Novel	2.30336e-05	OG0005584
AT1G12610	Meristem_Endocortex	Novel	2.22862e-05	OG0000812
AT5G20230	Meristem_Endocortex	Novel	2.19541e-05	OG0013076
AT5G59580	Meristem_Endocortex	Novel	2.18456e-05	OG0000754
AT5G63150	Meristem_Endocortex	Novel	2.16957e-05	OG0009602
AT5G41040	Meristem_Endocortex	Novel	2.16737e-05	OG0003728
AT1G74100	Meristem_Endocortex	Novel	2.0987e-05	OG0002346
AT5G01840	Meristem_Endocortex	Novel	2.08133e-05	OG0015190
AT4G39190	Meristem_Endocortex	Novel	2.06716e-05	OG0018140
AT2G36210	Meristem_Endocortex	Novel	2.04569e-05	OG0014830
AT1G02810	Meristem_Endocortex	Novel	2.03345e-05	OG0001725
AT5G26310	Meristem_Endocortex	Novel	2.02204e-05	OG0011844
AT5G06730	Meristem_Endocortex	Novel	1.9188e-05	OG0003753
AT1G70950	Meristem_Endocortex	Novel	1.91204e-05	OG0014462
AT3G63380	Meristem_Endocortex	Novel	1.90284e-05	OG0006299
AT1G52560	Meristem_Endocortex	Novel	1.77247e-05	OG0011063
AT3G11120	Meristem_Endocortex	Novel	1.74166e-05	OG0005539
AT2G16580	Meristem_Endocortex	Novel	1.74114e-05	OG0000223
AT5G67080	Meristem_Endocortex	Novel	1.7384e-05	OG0014980
AT5G02502	Meristem_Endocortex	Novel	1.72256e-05	OG0006521
AT5G63660	Meristem_Endocortex	Novel	1.68579e-05	OG0015155
AT5G05890	Meristem_Endocortex	Novel	1.68088e-05	OG0000624
AT5G62900	Meristem_Endocortex	Novel	1.63413e-05	OG0000407
AT1G13730	Meristem_Endocortex	Novel	1.60137e-05	OG0010912
AT1G72490	Meristem_Endocortex	Novel	1.59828e-05	OG0001668
AT2G41540	Meristem_Endocortex	Novel	1.54956e-05	OG0001849
AT5G64650	Meristem_Endocortex	Novel	1.54494e-05	OG0009681
AT5G24980	Meristem_Endocortex	Novel	1.53253e-05	OG0006799
AT1G68130	Meristem_Endocortex	Novel	1.51862e-05	OG0000847
AT4G33160	Meristem_Endocortex	Novel	1.51483e-05	OG0004937
AT3G18760	Meristem_Endocortex	Novel	1.51413e-05	OG0008790
AT5G48290	Meristem_Endocortex	Novel	1.49583e-05	OG0000162
AT4G28650	Meristem_Endocortex	Novel	1.49099e-05	OG0003118
AT3G59810	Meristem_Endocortex	Novel	1.48032e-05	OG0008105
AT3G10740	Meristem_Endocortex	Novel	1.459e-05	OG0003436
AT4G35050	Meristem_Endocortex	Novel	1.43931e-05	OG0014770
AT2G38380	Meristem_Endocortex	Novel	1.40368e-05	OG0004523
AT2G36180	Meristem_Endocortex	Novel	1.31854e-05	OG0008454
AT5G04080	Phloem	Novel	0.00167804	OG0009480
AT1G79430	Phloem	Novel	0.00161261	OG0014711
AT5G63990	Phloem	Novel	0.00147803	OG0002813
AT5G57350	Phloem	Novel	0.000999661	OG0000087
AT3G15353	Phloem	Novel	0.000708127	OG0014958
AT5G64240	Phloem	Novel	0.000689854	OG0015266
AT5G42146	Phloem	Novel	0.000684759	OG0013245
AT5G50720	Phloem	Novel	0.000661266	OG0001195
AT3G15650	Phloem	Novel	0.000572616	OG0000497
AT3G12730	Phloem	Novel	0.000521455	OG0000942
AT5G01750	Phloem	Novel	0.000489475	OG0003065
AT3G01950	Phloem	Novel	0.000478164	OG0018245
AT4G33660	Phloem	Novel	0.000471475	OG0006651
AT5G66440	Phloem	Novel	0.000442427	OG0013005
AT2G36650	Phloem	Novel	0.000394792	OG0018166
AT5G54660	Phloem	Novel	0.000391958	OG0009529
AT5G43380	Phloem	Novel	0.000353235	OG0000227
AT1G23530	Phloem	Novel	0.000345015	OG0017724
AT5G10625	Phloem	Novel	0.000310276	OG0001201
AT2G16740	Phloem	Novel	0.000306611	OG0000125
AT1G07640	Phloem	Novel	0.000278935	OG0018018
AT3G44220	Phloem	Novel	0.00027864	OG0001931
AT3G43270	Phloem	Novel	0.000270305	OG0006399
AT5G06850	Phloem	Novel	0.00026637	OG0000372
AT5G48960	Phloem	Novel	0.000261527	OG0012808
AT2G32990	Phloem	Novel	0.000252843	OG0004511
AT3G04300	Phloem	Novel	0.000245752	OG0001514
AT4G21310	Phloem	Novel	0.000235788	OG0002266
AT1G78520	Phloem	Novel	0.000235429	OG0001781
AT3G60490	Phloem	Novel	0.000233989	OG0018069
AT1G10380	Phloem	Novel	0.000224352	OG0014628
AT4G27450	Phloem	Novel	0.00021442	OG0003497
AT2G38640	Phloem	Novel	0.00021178	OG0000618
AT2G41300	Phloem	Novel	0.000202843	OG0000495
AT4G16480	Phloem	Novel	0.000201721	OG0004551
AT4G19840	Phloem	Novel	0.000176261	OG0003120
AT4G26840	Phloem	Novel	0.000174131	OG0002755
AT4G29690	Phloem	Novel	0.000170503	OG0015116
AT1G78580	Phloem	Novel	0.000162639	OG0005673
AT4G39700	Phloem	Novel	0.000150751	OG0003653
AT2G46630	Phloem	Novel	0.000141291	OG0008442
AT1G30110	Phloem	Novel	0.000132689	OG0017897
AT2G39830	Phloem	Novel	0.00013198	OG0005961
AT2G18196	Phloem	Novel	0.000128491	OG0011401
AT3G45610	Phloem	Novel	0.000123521	OG0000571
AT3G14780	Phloem	Novel	0.000118418	OG0018293
AT4G36740	Phloem	Novel	0.000112148	OG0001470
AT2G23960	Phloem	Novel	0.00010216	OG0001884
AT2G03500	Phloem	Novel	0.000101509	OG0011477
AT5G63850	Phloem	Novel	0.0001007	OG0015149
AT2G05760	Phloem	Novel	9.41662e-05	OG0004513
AT5G40980	Phloem	Novel	8.84147e-05	OG0006522
AT5G18970	Phloem	Novel	8.56294e-05	OG0015226
AT3G21600	Phloem	Novel	8.55842e-05	OG0006408
AT2G02000	Phloem	Novel	8.53636e-05	OG0000258
AT5G47920	Phloem	Novel	8.23697e-05	OG0005073
AT5G65280	Phloem	Novel	8.18031e-05	OG0018751
AT1G14730	Phloem	Novel	8.08172e-05	OG0007514
AT1G70710	Phloem	Novel	7.75808e-05	OG0004025
AT1G08160	Phloem	Novel	7.66823e-05	OG0007740
AT1G43650	Phloem	Novel	7.35801e-05	OG0000419
AT2G31940	Phloem	Novel	7.24764e-05	OG0008129
AT5G43870	Phloem	Novel	7.19329e-05	OG0001507
AT1G11570	Phloem	Novel	7.15375e-05	OG0001711
AT3G63200	Phloem	Novel	7.11269e-05	OG0018425
AT5G56320	Phloem	Novel	6.8625e-05	OG0000736
AT5G22090	Phloem	Novel	6.51824e-05	OG0012806
AT1G68430	Phloem	Novel	6.19977e-05	OG0003206
AT3G43250	Phloem	Novel	6.11007e-05	OG0004356
AT1G70280	Phloem	Novel	5.87791e-05	OG0001049
AT5G62940	Phloem	Novel	5.61912e-05	OG0006848
AT5G49320	Phloem	Novel	5.31213e-05	OG0012801
AT1G33080	Phloem	Novel	4.84377e-05	OG0000588
AT2G28810	Phloem	Novel	4.78869e-05	OG0018018
AT4G02810	Phloem	Novel	4.24806e-05	OG0017761
AT5G62960	Phloem	Novel	4.14964e-05	OG0001011
AT5G40960	Phloem	Novel	3.96367e-05	OG0006837
AT2G19590	Phloem	Novel	3.8611e-05	OG0005926
AT1G29520	Phloem	Novel	3.78218e-05	OG0005481
AT2G44130	Phloem	Novel	3.54826e-05	OG0018152
AT5G02750	Phloem	Novel	3.49988e-05	OG0009438
AT3G24770	Phloem	Novel	3.38e-05	OG0014913
AT2G32280	Phloem	Novel	3.32707e-05	OG0002266
AT1G23550	Phloem	Novel	3.22155e-05	OG0001311
AT3G60720	Phloem	Novel	3.17367e-05	OG0006401
AT4G35985	Phloem	Novel	3.13038e-05	OG0003304
AT2G20750	Phloem	Novel	3.06041e-05	OG0008389
AT5G23170	Phloem	Novel	3.04564e-05	OG0013055
AT4G18440	Phloem	Novel	2.866e-05	OG0005581
AT1G31770	Phloem	Novel	2.80244e-05	OG0007446
AT4G37450	Phloem	Novel	2.72228e-05	OG0018203
AT3G63050	Phloem	Novel	2.6608e-05	OG0018206
AT4G15680	Phloem	Novel	2.58853e-05	OG0000136
AT1G24735	Phloem	Novel	2.54328e-05	OG0011212
AT5G59080	Phloem	Novel	2.47064e-05	OG0000606
AT5G04370	Phloem	Novel	2.3748e-05	OG0001907
AT4G36950	Phloem	Novel	2.35214e-05	OG0014980
AT1G31880	Phloem	Novel	2.34595e-05	OG0000808
AT2G15680	Phloem	Novel	2.27168e-05	OG0008095
AT5G41380	Phloem	Novel	2.2636e-05	OG0014607
AT2G37590	Phloem	Novel	2.25981e-05	OG0000886
AT5G17450	Phloem	Novel	2.18146e-05	OG0002321
AT2G32020	Phloem	Novel	2.15395e-05	OG0001486
AT2G37925	Phloem	Novel	2.13621e-05	OG0000898
AT5G42720	Phloem	Novel	2.12102e-05	OG0003291
AT5G55050	Phloem	Novel	2.07037e-05	OG0005051
AT4G20270	Phloem	Novel	2.06986e-05	OG0018551
AT4G23750	Phloem	Novel	2.05117e-05	OG0012341
AT4G05220	Phloem	Novel	2.03081e-05	OG0005618
AT4G24670	Phloem	Novel	1.96849e-05	OG0000556
AT3G62070	Phloem	Novel	1.84431e-05	OG0005949
AT3G18940	Phloem	Novel	1.75322e-05	OG0006326
AT3G22910	Phloem	Novel	1.64954e-05	OG0006299
AT5G13880	Phloem	Novel	1.63993e-05	OG0005073
AT2G02230	Phloem	Novel	1.58988e-05	OG0000698
AT1G52140	Phloem	Novel	1.5582e-05	OG0001768
AT5G56530	Phloem	Novel	1.5448e-05	OG0001075
AT3G28455	Phloem	Novel	1.54139e-05	OG0001549
AT2G43050	Phloem	Novel	1.53027e-05	OG0011610
AT1G11915	Phloem	Novel	1.4999e-05	OG0011097
AT5G14110	Phloem	Novel	1.49972e-05	OG0018245
AT1G71870	Phloem	Novel	1.48804e-05	OG0010648
AT4G03210	Phloem	Novel	1.42018e-05	OG0006585
AT1G74055	Phloem	Novel	1.39544e-05	OG0004282
AT1G63300	Phloem	Novel	1.37873e-05	OG0002261
AT3G58720	Phloem	Novel	1.36736e-05	OG0008964
AT4G17905	Phloem	Novel	1.34259e-05	OG0001942
AT5G17600	Phloem	Novel	1.29831e-05	OG0001942
AT4G13710	Phloem	Novel	1.29689e-05	OG0000589
AT3G17690	Phloem	Novel	1.25488e-05	OG0006237
AT2G20585	Phloem	Novel	1.23242e-05	OG0001813
AT4G20240	Phloem	Novel	1.21131e-05	OG0000084
AT1G70470	Phloem	Novel	1.20096e-05	OG0017724
AT3G01680	Phloem	Novel	1.16296e-05	OG0006418
AT3G13560	Phloem	Novel	1.10477e-05	OG0012094
AT1G63820	Phloem	Novel	1.09234e-05	OG0014607
AT1G75600	Phloem	Novel	1.09038e-05	OG0000062
AT5G50290	Phloem	Novel	1.06921e-05	OG0013027
AT4G24015	Phloem	Novel	1.00997e-05	OG0018577
AT2G16050	Phloem	Novel	9.5766e-06	OG0008240
AT5G05365	Phloem	Novel	9.38206e-06	OG0013249
AT3G17010	Phloem	Novel	9.37784e-06	OG0004429
AT5G67110	Phloem	Novel	8.80035e-06	OG0006782
AT3G51680	Phloem	Novel	8.67041e-06	OG0006236
AT5G21482	Phloem	Novel	8.55167e-06	OG0006820
AT3G03770	Phloem	Novel	8.4104e-06	OG0004665
AT5G24490	Phloem	Novel	8.20436e-06	OG0009613
AT1G63310	Phloem	Novel	8.15276e-06	OG0005486
AT2G30000	Phloem	Novel	8.09764e-06	OG0004066
AT2G28420	Phloem	Novel	7.44028e-06	OG0011532
AT5G27400	Phloem	Novel	7.08866e-06	OG0013006
AT1G78320	Phloem	Novel	7.03846e-06	OG0000158
AT1G54770	Phloem	Novel	6.98205e-06	OG0005620
AT1G20930	Phloem	Novel	6.68004e-06	OG0007625
AT2G43840	Phloem	Novel	6.55897e-06	OG0000331
AT5G02140	Phloem	Novel	6.5569e-06	OG0009498
AT1G21140	Phloem	Novel	6.46644e-06	OG0000357
AT5G09500	Phloem	Novel	6.18261e-06	OG0001335
AT4G31730	Phloem	Novel	6.07591e-06	OG0006131
AT3G17730	Phloem	Novel	5.95707e-06	OG0011736
AT4G14000	Phloem	Novel	5.77545e-06	OG0009133
AT3G51720	Phloem	Novel	5.66249e-06	OG0003351
AT3G63300	Phloem	Novel	5.47643e-06	OG0001507
AT1G65910	Phloem	Novel	5.00665e-06	OG0005392
AT3G21420	Phloem	Novel	4.98533e-06	OG0012181
AT5G39850	Phloem	Novel	4.85463e-06	OG0002811
AT3G05327	Phloem	Novel	4.74442e-06	OG0004794
AT3G20570	Phloem	Novel	4.72437e-06	OG0001120
AT2G44270	Phloem	Novel	4.65803e-06	OG0005421
AT3G62960	Phloem	Novel	4.45604e-06	OG0005752
AT3G13160	Phloem	Novel	4.38844e-06	OG0001286
AT5G13840	Phloem	Novel	4.27104e-06	OG0015213
AT5G56050	Phloem	Novel	4.26513e-06	OG0006574
AT1G48750	Phloem	Novel	3.21246e-06	OG0001811
AT5G60180	Phloem	Novel	3.19901e-06	OG0003063
AT4G20190	Phloem	Novel	3.0224e-06	OG0003155
AT2G44580	Phloem	Novel	2.93957e-06	OG0008173
AT1G73630	Phloem	Novel	2.67946e-06	OG0001357
AT1G32450	Phloem	Novel	2.66868e-06	OG0001029
AT5G14070	Phloem	Novel	2.57345e-06	OG0000136
AT3G55605	Phloem	Novel	2.56731e-06	OG0002498
AT2G27140	Phloem	Novel	2.33295e-06	OG0004555
AT1G02950	Phloem	Novel	2.23735e-06	OG0001351
AT4G15700	Phloem	Novel	2.21407e-06	OG0000136
AT5G03840	Phloem	Novel	2.06904e-06	OG0000511
AT5G09570	Phloem	Novel	2.05466e-06	OG0006913
AT2G40550	Phloem	Novel	1.92518e-06	OG0008214
AT1G76770	Phloem	Novel	1.9251e-06	OG0005806
AT4G28230	Phloem	Novel	1.89714e-06	OG0009039
AT2G42820	Phloem	Novel	1.84212e-06	OG0004417
AT2G27035	Phloem	Novel	1.81435e-06	OG0005920
AT2G34190	Phloem	Novel	1.75201e-06	OG0004513
AT5G43300	Phloem	Novel	1.75069e-06	OG0006447
AT1G05760	Phloem	Novel	1.69943e-06	OG0001400
AT1G33475	Phloem	Novel	1.49742e-06	OG0008045
AT1G04330	Phloem	Novel	1.47316e-06	OG0007582
AT5G46530	Phloem	Novel	1.44904e-06	OG0005481
AT1G64220	Phloem	Novel	1.42662e-06	OG0004210
AT1G65390	Phloem	Novel	1.42557e-06	OG0000172
AT3G25573	Phloem	Novel	1.37173e-06	OG0018452
AT2G02130	Stele1	Novel	0.00781286	OG0001030
AT1G71692	Stele1	Novel	0.0067607	OG0004288
AT5G46700	Stele1	Novel	0.0053304	OG0013013
AT4G18510	Stele1	Novel	0.00437317	OG0017720
AT2G13820	Stele1	Novel	0.00424122	OG0000893
AT3G14990	Stele1	Novel	0.00417076	OG0005506
AT2G24260	Stele1	Novel	0.00411705	OG0004515
AT4G14130	Stele1	Novel	0.00325595	OG0014989
AT4G11210	Stele1	Novel	0.00304665	OG0001069
AT3G16330	Stele1	Novel	0.00294091	OG0001768
AT4G14010	Stele1	Novel	0.00277069	OG0018521
AT4G39200	Stele1	Novel	0.00276453	OG0003344
AT2G47610	Stele1	Novel	0.0024175	OG0001454
AT3G21770	Stele1	Novel	0.00241179	OG0000492
AT1G02780	Stele1	Novel	0.00241068	OG0001717
AT5G03610	Stele1	Novel	0.00229311	OG0004598
AT3G11630	Stele1	Novel	0.00225071	OG0006296
AT4G29100	Stele1	Novel	0.00222069	OG0001457
AT3G45700	Stele1	Novel	0.00215795	OG0000437
AT3G49910	Stele1	Novel	0.00212464	OG0002631
AT3G11930	Stele1	Novel	0.00210687	OG0008854
AT4G22570	Stele1	Novel	0.00205428	OG0002277
AT1G52300	Stele1	Novel	0.00200845	OG0001806
AT1G77020	Stele1	Novel	0.00194298	OG0010789
AT1G44800	Stele1	Novel	0.00192375	OG0002249
AT3G25520	Stele1	Novel	0.00183134	OG0002658
AT3G11940	Stele1	Novel	0.00180951	OG0003292
AT5G16570	Stele1	Novel	0.00177861	OG0000500
AT4G15000	Stele1	Novel	0.00171566	OG0001982
AT1G01100	Stele1	Novel	0.00167429	OG0014637
AT1G62380	Stele1	Novel	0.00163425	OG0018003
AT3G59690	Stele1	Novel	0.00159587	OG0006150
AT5G05790	Stele1	Novel	0.00157551	OG0012034
AT3G02080	Stele1	Novel	0.00153197	OG0002679
AT3G53870	Stele1	Novel	0.00151527	OG0001445
AT1G70600	Stele1	Novel	0.00149309	OG0004023
AT1G69620	Stele1	Novel	0.0014294	OG0001328
AT3G48930	Stele1	Novel	0.00141182	OG0000930
AT2G05830	Stele1	Novel	0.00140743	OG0006062
AT3G04400	Stele1	Novel	0.00135247	OG0000832
AT4G18100	Stele1	Novel	0.00134265	OG0003604
AT5G28060	Stele1	Novel	0.00133512	OG0000627
AT2G27530	Stele1	Novel	0.00127683	OG0001759
AT2G36160	Stele1	Novel	0.00124804	OG0002565
AT4G22212	Stele1	Novel	0.00124538	OG0006544
AT1G07770	Stele1	Novel	0.00118259	OG0001792
AT4G18730	Stele1	Novel	0.00117118	OG0000746
AT5G15200	Stele1	Novel	0.00115945	OG0002811
AT3G59540	Stele1	Novel	0.00114616	OG0006060
AT3G24830	Stele1	Novel	0.0011242	OG0002612
AT1G67430	Stele1	Novel	0.00108681	OG0004105
AT2G34480	Stele1	Novel	0.00107522	OG0001732
AT1G71050	Stele1	Novel	0.00104665	OG0002321
AT2G43460	Stele1	Novel	0.00104484	OG0006060
AT4G09800	Stele1	Novel	0.00102696	OG0001342
AT3G53740	Stele1	Novel	0.00101763	OG0002462
AT5G02450	Stele1	Novel	0.000988678	OG0002462
AT1G62480	Stele1	Novel	0.000959404	OG0017964
AT2G19730	Stele1	Novel	0.000956967	OG0006112
AT5G27850	Stele1	Novel	0.000886955	OG0002614
AT1G23760	Stele1	Novel	0.000874227	OG0000824
AT3G53890	Stele1	Novel	0.000873992	OG0001158
AT1G26450	Stele1	Novel	0.000858295	OG0017888
AT3G61110	Stele1	Novel	0.000848595	OG0006226
AT5G41520	Stele1	Novel	0.000843802	OG0001208
AT1G77940	Stele1	Novel	0.000837074	OG0001745
AT2G47110	Stele1	Novel	0.000831264	OG0002288
AT5G56710	Stele1	Novel	0.000830293	OG0003373
AT1G27030	Stele1	Novel	0.000808194	OG0017745
AT3G28600	Stele1	Novel	0.000798349	OG0011961
AT1G04270	Stele1	Novel	0.000797178	OG0001335
AT5G02960	Stele1	Novel	0.000793853	OG0001173
AT3G62250	Stele1	Novel	0.000781939	OG0002288
AT1G76790	Stele1	Novel	0.000778921	OG0000810
AT1G75750	Stele1	Novel	0.000769539	OG0014615
AT2G38750	Stele1	Novel	0.000758794	OG0005885
AT3G14600	Stele1	Novel	0.000743719	OG0001732
AT3G60770	Stele1	Novel	0.000733229	OG0001954
AT3G26610	Stele1	Novel	0.000730848	OG0012062
AT4G17390	Stele1	Novel	0.000729805	OG0001567
AT5G53120	Stele1	Novel	0.000706989	OG0007010
AT3G05590	Stele1	Novel	0.000693677	OG0002614
AT3G04920	Stele1	Novel	0.000689597	OG0000627
AT3G11510	Stele1	Novel	0.00068256	OG0002565
AT3G55370	Stele1	Novel	0.000682239	OG0000886
AT3G56340	Stele1	Novel	0.000681631	OG0002481
AT3G61990	Stele1	Novel	0.000666855	OG0008890
AT5G07090	Stele1	Novel	0.00066113	OG0002485
AT3G09500	Stele1	Novel	0.000651427	OG0002539
AT5G02870	Stele1	Novel	0.000642242	OG0001531
AT3G49010	Stele1	Novel	0.000633127	OG0002643
AT1G72370	Stele1	Novel	0.000607107	OG0001378
AT3G62870	Stele1	Novel	0.000574461	OG0001454
AT2G31083	Stele1	Novel	0.000564333	OG0008455
AT1G23290	Stele1	Novel	0.000555947	OG0004023
AT1G16310	Stele1	Novel	0.00055123	OG0002984
AT1G18540	Stele1	Novel	0.000546596	OG0001374
AT2G01250	Stele1	Novel	0.000546125	OG0000924
AT3G04840	Stele1	Novel	0.000543141	OG0000932
AT2G33990	Stele1	Novel	0.000538506	OG0002549
AT4G31700	Stele1	Novel	0.000534478	OG0003610
AT3G05560	Stele1	Novel	0.000517499	OG0002622
AT1G22780	Stele1	Novel	0.000509779	OG0001342
AT3G60245	Stele1	Novel	0.000498214	OG0003476
AT3G55750	Stele1	Novel	0.000485057	OG0001017
AT1G09690	Stele1	Novel	0.000484412	OG0001290
AT4G23500	Stele1	Novel	0.000475294	OG0000910
AT3G02560	Stele1	Novel	0.000467531	OG0018360
AT2G42910	Stele1	Novel	0.000462019	OG0004565
AT4G15340	Stele1	Novel	0.000455673	OG0004267
AT4G30660	Stele1	Novel	0.000450884	OG0008233
AT1G43170	Stele1	Novel	0.000448986	OG0001061
AT3G16410	Stele1	Novel	0.000444938	OG0005837
AT5G43180	Stele1	Novel	0.000443843	OG0018650
AT2G37190	Stele1	Novel	0.000440002	OG0000905
AT3G01280	Stele1	Novel	0.000423297	OG0004718
AT2G21060	Stele1	Novel	0.00041825	OG0001111
AT2G27720	Stele1	Novel	0.000417553	OG0000377
AT1G57660	Stele1	Novel	0.000407613	OG0001290
AT1G33120	Stele1	Novel	0.000392961	OG0000591
AT1G16350	Stele1	Novel	0.000376651	OG0003997
AT5G44160	Stele1	Novel	0.000374991	OG0000476
AT5G26340	Stele1	Novel	0.000374263	OG0012819
AT3G22230	Stele1	Novel	0.000369771	OG0001982
AT2G27710	Stele1	Novel	0.000360506	OG0000377
AT4G38580	Stele1	Novel	0.000359787	OG0006631
AT3G53020	Stele1	Novel	0.000358202	OG0003358
AT2G21580	Stele1	Novel	0.000354211	OG0003344
AT5G28080	Stele1	Novel	0.000349312	OG0004747
AT3G06700	Stele1	Novel	0.0003475	OG0003540
AT1G67080	Stele1	Novel	0.000343892	OG0004337
AT2G39460	Stele1	Novel	0.000343272	OG0001863
AT1G20310	Stele1	Novel	0.00034031	OG0003985
AT5G44530	Stele1	Novel	0.00033532	OG0002733
AT2G33370	Stele1	Novel	0.000332677	OG0000832
AT5G24800	Stele1	Novel	0.000332676	OG0009680
AT1G43910	Stele1	Novel	0.000328265	OG0007463
AT3G23390	Stele1	Novel	0.000316159	OG0001185
AT3G56020	Stele1	Novel	0.000315025	OG0005539
AT1G17880	Stele1	Novel	0.000314263	OG0000821
AT5G03850	Stele1	Novel	0.000308927	OG0004675
AT2G19740	Stele1	Novel	0.000291173	OG0003373
AT4G09320	Stele1	Novel	0.000287853	OG0006621
AT1G70310	Stele1	Novel	0.00028519	OG0007820
AT2G42430	Stele1	Novel	0.000284252	OG0011343
AT1G71695	Stele1	Novel	0.000276885	OG0004296
AT3G23170	Stele1	Novel	0.000275459	OG0007582
AT4G34600	Stele1	Novel	0.000262628	OG0004386
AT1G04480	Stele1	Novel	0.000257554	OG0000832
AT2G29530	Stele1	Novel	0.000254912	OG0004602
AT5G19875	Stele1	Novel	0.000243369	OG0008129
AT2G32060	Stele1	Novel	0.000231632	OG0001301
AT2G18020	Stele1	Novel	0.000231614	OG0002512
AT4G16720	Stele1	Novel	0.000225578	OG0001567
AT1G80690	Stele1	Novel	0.000224076	OG0014627
AT2G22860	Stele1	Novel	0.000223555	OG0000716
AT5G17760	Stele1	Novel	0.000219467	OG0006182
AT3G44010	Stele1	Novel	0.00021746	OG0001956
AT4G33700	Stele1	Novel	0.000216459	OG0000713
AT2G17360	Stele1	Novel	0.000215345	OG0002485
AT5G62300	Stele1	Novel	0.000215109	OG0003432
AT3G18740	Stele1	Novel	0.000213109	OG0001745
AT5G47700	Stele1	Novel	0.000210421	OG0014637
AT5G22440	Stele1	Novel	0.000210062	OG0001759
AT4G26230	Stele1	Novel	0.000207462	OG0003373
AT5G19260	Stele1	Novel	0.000206957	OG0008536
AT2G41840	Stele1	Novel	0.000206145	OG0001045
AT1G76240	Stele1	Novel	0.000200018	OG0001333
AT5G16130	Stele1	Novel	0.000198515	OG0018360
AT3G53430	Stele1	Novel	0.000194453	OG0000905
AT5G39740	Stele1	Novel	0.000193225	OG0002658
AT2G33830	Stele1	Novel	0.000191967	OG0003237
AT4G37400	Stele1	Novel	0.000188585	OG0000135
AT5G39580	Stele1	Novel	0.00017678	OG0015166
AT3G12090	Stele1	Novel	0.000174826	OG0003457
AT3G10525	Stele1	Novel	0.000171476	OG0018436
AT5G47720	Stele1	Novel	0.000170604	OG0002068
AT5G54980	Stele1	Novel	0.000165071	OG0009592
AT2G37270	Stele1	Novel	0.000162134	OG0003292
AT3G07110	Stele1	Novel	0.000161532	OG0002612
AT1G27660	Stele1	Novel	0.000159391	OG0007724
AT4G33865	Stele1	Novel	0.000157258	OG0001956
AT5G37660	Stele1	Novel	0.000154977	OG0015276
AT1G41880	Stele1	Novel	0.000150976	OG0001017
AT3G49760	Stele1	Novel	0.00015029	OG0011412
AT3G11280	Stele1	Novel	0.000148088	OG0012034
AT5G22650	Stele1	Novel	0.000147252	OG0001993
AT2G19750	Stele1	Novel	0.0001442	OG0001912
AT1G09590	Stele1	Novel	0.000142902	OG0001290
AT3G47370	Stele1	Novel	0.000142107	OG0003432
AT5G59850	Stele1	Novel	0.000142029	OG0001792
AT4G39660	Stele1	Novel	0.000135868	OG0009232
AT4G29410	Stele1	Novel	0.000132922	OG0006112
AT3G01220	Stele1	Novel	0.00013215	OG0012165
AT1G62840	Stele1	Novel	0.000131726	OG0002415
AT3G59930	Stele1	Novel	0.000131022	OG0003234
AT4G29390	Stele1	Novel	0.000128665	OG0001912
AT4G24770	Stele1	Novel	0.000127771	OG0001560
AT2G03090	Stele1	Novel	0.000125995	OG0000736
AT5G47210	Stele1	Novel	0.000125981	OG0018542
AT2G40480	Stele2	Novel	0.00338936	OG0018086
AT1G25530	Stele2	Novel	0.00320331	OG0017915
AT1G22710	Stele2	Novel	0.0026497	OG0003003
AT1G69080	Stele2	Novel	0.00240892	OG0002980
AT3G51670	Stele2	Novel	0.00218445	OG0006233
AT1G72230	Stele2	Novel	0.00214031	OG0001379
AT1G71880	Stele2	Novel	0.00200421	OG0003003
AT1G66230	Stele2	Novel	0.00190604	OG0000321
AT1G77690	Stele2	Novel	0.00187786	OG0000316
AT1G11580	Stele2	Novel	0.00151887	OG0004056
AT2G30400	Stele2	Novel	0.00147347	OG0001334
AT2G34140	Stele2	Novel	0.00143154	OG0001405
AT5G05690	Stele2	Novel	0.00131654	OG0006984
AT1G79760	Stele2	Novel	0.00122648	OG0010785
AT5G02440	Stele2	Novel	0.00120803	OG0018662
AT5G44020	Stele2	Novel	0.00117598	OG0014670
AT4G31820	Stele2	Novel	0.001163	OG0009086
AT1G12080	Stele2	Novel	0.00116241	OG0017964
AT2G46890	Stele2	Novel	0.000970921	OG0008127
AT4G32000	Stele2	Novel	0.000968205	OG0003409
AT4G05120	Stele2	Novel	0.000835417	OG0000711
AT1G61660	Stele2	Novel	0.00077262	OG0003110
AT5G06570	Stele2	Novel	0.000740048	OG0003685
AT1G64660	Stele2	Novel	0.000731545	OG0005623
AT5G02380	Stele2	Novel	0.000718089	OG0004805
AT2G45470	Stele2	Novel	0.00070519	OG0008241
AT1G72150	Stele2	Novel	0.000652154	OG0017739
AT3G61850	Stele2	Novel	0.000615776	OG0008480
AT5G59090	Stele2	Novel	0.000581807	OG0000436
AT2G29640	Stele2	Novel	0.00049216	OG0011534
AT2G43910	Stele2	Novel	0.000453039	OG0018096
AT1G32100	Stele2	Novel	0.000447044	OG0000843
AT2G26380	Stele2	Novel	0.000430342	OG0003075
AT3G12500	Stele2	Novel	0.000425952	OG0000179
AT1G76410	Stele2	Novel	0.000406488	OG0000409
AT5G48070	Stele2	Novel	0.000400307	OG0010871
AT2G38120	Stele2	Novel	0.000393102	OG0000316
AT4G39640	Stele2	Novel	0.000390463	OG0005626
AT5G54145	Stele2	Novel	0.000389591	OG0012480
AT1G80120	Stele2	Novel	0.000372337	OG0004077
AT2G46150	Stele2	Novel	0.000338215	OG0005691
AT1G75500	Stele2	Novel	0.000329728	OG0010945
AT1G62990	Stele2	Novel	0.000323563	OG0004303
AT5G46590	Stele2	Novel	0.000312262	OG0003198
AT5G08260	Stele2	Novel	0.000310714	OG0015141
AT5G57685	Stele2	Novel	0.000301731	OG0002732
AT3G49690	Stele2	Novel	0.000268834	OG0001501
AT5G57770	Stele2	Novel	0.000268828	OG0009540
AT3G55420	Stele2	Novel	0.000264856	OG0006416
AT5G03960	Stele2	Novel	0.000241498	OG0005792
AT2G41130	Stele2	Novel	0.000237657	OG0008085
AT5G52650	Stele2	Novel	0.000234407	OG0001208
AT2G19460	Stele2	Novel	0.000231137	OG0000376
AT5G23740	Stele2	Novel	0.000223747	OG0000930
AT1G52190	Stele2	Novel	0.000221887	OG0002373
AT1G64740	Stele2	Novel	0.000214201	OG0000254
AT2G16060	Stele2	Novel	0.000214074	OG0004470
AT2G25790	Stele2	Novel	0.000213377	OG0018139
AT2G28660	Stele2	Novel	0.000206324	OG0001882
AT1G33700	Stele2	Novel	0.000206041	OG0017829
AT5G11100	Stele2	Novel	0.000194575	OG0000688
AT1G66050	Stele2	Novel	0.000194444	OG0000567
AT2G01950	Stele2	Novel	0.000193715	OG0011377
AT5G65870	Stele2	Novel	0.000169944	OG0000716
AT4G09160	Stele2	Novel	0.000166918	OG0001789
AT5G21105	Stele2	Novel	0.00015528	OG0006934
AT3G25780	Stele2	Novel	0.000153645	OG0002232
AT1G66600	Stele2	Novel	0.00014542	OG0005703
AT2G31345	Stele2	Novel	0.000145309	OG0007944
AT5G48460	Stele2	Novel	0.000144465	OG0009795
AT2G43120	Stele2	Novel	0.000140498	OG0003335
AT1G47670	Stele2	Novel	0.000133774	OG0011011
AT3G48970	Stele2	Novel	0.000129437	OG0018281
AT4G36710	Stele2	Novel	0.000126774	OG0018516
AT1G77330	Stele2	Novel	0.000123155	OG0002210
AT1G70130	Stele2	Novel	0.000121457	OG0001770
AT5G58420	Stele2	Novel	0.000121056	OG0002485
AT1G66200	Stele2	Novel	0.000117804	OG0000500
AT3G11690	Stele2	Novel	0.000117766	OG0000921
AT3G29670	Stele2	Novel	0.000115399	OG0001522
AT1G04550	Stele2	Novel	0.000109692	OG0002434
AT1G20823	Stele2	Novel	9.28925e-05	OG0000409
AT2G15760	Stele2	Novel	8.90597e-05	OG0004390
AT3G16180	Stele2	Novel	8.8234e-05	OG0002373
AT5G27000	Stele2	Novel	8.47458e-05	OG0001320
AT5G59010	Stele2	Novel	8.01996e-05	OG0000366
AT5G52870	Stele2	Novel	7.81902e-05	OG0006774
AT3G10340	Stele2	Novel	7.76853e-05	OG0018306
AT1G07570	Stele2	Novel	7.71391e-05	OG0018041
AT2G22122	Stele2	Novel	7.68241e-05	OG0014766
AT1G13380	Stele2	Novel	7.65985e-05	OG0010994
AT1G58340	Stele2	Novel	7.42424e-05	OG0011074
AT4G09460	Stele2	Novel	7.39067e-05	OG0007955
AT2G26400	Stele2	Novel	7.33917e-05	OG0002521
AT1G51950	Stele2	Novel	7.01987e-05	OG0002311
AT5G06530	Stele2	Novel	6.92424e-05	OG0012638
AT1G48830	Stele2	Novel	6.67855e-05	OG0003151
AT5G33320	Stele2	Novel	6.65338e-05	OG0005094
AT1G70800	Stele2	Novel	6.58622e-05	OG0000249
AT4G01250	Stele2	Novel	6.53108e-05	OG0002721
AT3G54290	Stele2	Novel	6.52476e-05	OG0006368
AT1G02400	Stele2	Novel	6.30245e-05	OG0002979
AT4G31550	Stele2	Novel	6.15431e-05	OG0003359
AT5G43700	Stele2	Novel	6.01384e-05	OG0000837
AT1G59740	Stele2	Novel	5.98407e-05	OG0017750
AT1G60390	Stele2	Novel	5.85697e-05	OG0000824
AT2G22800	Stele2	Novel	5.81739e-05	OG0011408
AT1G17420	Stele2	Novel	5.80263e-05	OG0001014
AT3G06750	Stele2	Novel	5.54407e-05	OG0008874
AT1G29160	Stele2	Novel	5.45972e-05	OG0001405
AT4G28720	Stele2	Novel	5.39011e-05	OG0003201
AT5G09800	Stele2	Novel	5.22344e-05	OG0001177
AT3G17580	Stele2	Novel	5.2004e-05	OG0004331
AT5G44005	Stele2	Novel	5.17485e-05	OG0003749
AT3G50070	Stele2	Novel	4.90425e-05	OG0002644
AT1G07400	Stele2	Novel	4.90366e-05	OG0000557
AT4G22010	Stele2	Novel	4.74856e-05	OG0000361
AT5G14210	Stele2	Novel	4.69302e-05	OG0005075
AT2G27550	Stele2	Novel	4.57583e-05	OG0000511
AT3G05936	Stele2	Novel	4.4346e-05	OG0012214
AT5G20110	Stele2	Novel	4.41255e-05	OG0013209
AT5G44710	Stele2	Novel	4.39898e-05	OG0009724
AT3G48450	Stele2	Novel	4.38905e-05	OG0018340
AT2G46400	Stele2	Novel	4.17716e-05	OG0000753
AT4G34560	Stele2	Novel	4.12666e-05	OG0009213
AT2G01660	Stele2	Novel	4.09505e-05	OG0017743
AT5G07580	Stele2	Novel	3.97572e-05	OG0012784
AT5G50150	Stele2	Novel	3.96972e-05	OG0000689
AT1G16030	Stele2	Novel	3.83347e-05	OG0000132
AT5G67160	Stele2	Novel	3.67125e-05	OG0004768
AT4G17670	Stele2	Novel	3.64703e-05	OG0015092
AT3G62040	Stele2	Novel	3.29354e-05	OG0011861
AT4G28930	Stele2	Novel	3.278e-05	OG0015055
AT5G15960	Stele2	Novel	3.2211e-05	OG0018712
AT4G14680	Stele2	Novel	3.12424e-05	OG0001086
AT1G02205	Stele2	Novel	3.11881e-05	OG0001108
AT3G54470	Stele2	Novel	3.08708e-05	OG0003564
AT5G04600	Stele2	Novel	3.05313e-05	OG0012877
AT5G62360	Stele2	Novel	2.98711e-05	OG0012919
AT1G22810	Stele2	Novel	2.96046e-05	OG0004095
AT2G22930	Stele2	Novel	2.94164e-05	OG0000564
AT1G74270	Stele2	Novel	2.9023e-05	OG0001017
AT3G45010	Stele2	Novel	2.89689e-05	OG0000623
AT5G16720	Stele2	Novel	2.88451e-05	OG0005449
AT3G11170	Stele2	Novel	2.88097e-05	OG0002632
AT5G57130	Stele2	Novel	2.8761e-05	OG0003661
AT5G18130	Stele2	Novel	2.73818e-05	OG0006367
AT4G15830	Stele2	Novel	2.71629e-05	OG0012542
AT3G56480	Stele2	Novel	2.6199e-05	OG0003252
AT3G20050	Stele2	Novel	2.56075e-05	OG0008517
AT5G66780	Stele2	Novel	2.38974e-05	OG0009361
AT5G11280	Stele2	Novel	2.36736e-05	OG0006794
AT2G43780	Stele2	Novel	2.34548e-05	OG0005918
AT3G26830	Stele2	Novel	2.21703e-05	OG0000187
AT1G35210	Stele2	Novel	2.21198e-05	OG0001787
AT2G05790	Stele2	Novel	2.18341e-05	OG0004525
AT5G56030	Stele2	Novel	2.18312e-05	OG0000643
AT5G10410	Stele2	Novel	2.1622e-05	OG0004868
AT4G10250	Stele2	Novel	2.11829e-05	OG0009289
AT5G38010	Stele2	Novel	2.07064e-05	OG0000754
AT1G08230	Stele2	Novel	2.03419e-05	OG0011238
AT1G18740	Stele2	Novel	1.96898e-05	OG0004170
AT2G28500	Stele2	Novel	1.95916e-05	OG0001073
AT1G80520	Stele2	Novel	1.94443e-05	OG0001808
AT4G28100	Stele2	Novel	1.93825e-05	OG0006591
AT3G49620	Stele2	Novel	1.93278e-05	OG0004612
AT1G31710	Stele2	Novel	1.92018e-05	OG0002378
AT1G05300	Stele2	Novel	1.90835e-05	OG0001371
AT1G15520	Stele2	Novel	1.88739e-05	OG0000291
AT5G20180	Stele2	Novel	1.81817e-05	OG0009716
AT3G20898	Stele2	Novel	1.81434e-05	OG0014446
AT3G47510	Stele2	Novel	1.75193e-05	OG0000375
AT4G37260	Stele2	Novel	1.74889e-05	OG0002557
AT5G52400	Stele2	Novel	1.74369e-05	OG0009520
AT3G44720	Stele2	Novel	1.72976e-05	OG0018247
AT3G16510	Stele2	Novel	1.71229e-05	OG0011749
AT4G38660	Stele2	Novel	1.70789e-05	OG0002722
AT4G37430	Stele2	Novel	1.67156e-05	OG0000135
AT5G47320	Stele2	Novel	1.66522e-05	OG0005003
AT1G12140	Stele2	Novel	1.64308e-05	OG0000315
AT5G17000	Stele2	Novel	1.57685e-05	OG0000584
AT3G58540	Stele2	Novel	1.57326e-05	OG0018383
AT1G24100	Stele2	Novel	1.55963e-05	OG0007889
AT1G14480	Stele2	Novel	1.54029e-05	OG0002989
AT3G16500	Stele2	Novel	1.53526e-05	OG0002311
AT2G45310	Stele2	Novel	1.52261e-05	OG0003092
AT1G64650	Stele2	Novel	1.47663e-05	OG0002331
AT3G53820	Stele2	Novel	1.47153e-05	OG0003473
AT4G10390	Stele2	Novel	1.46803e-05	OG0000590
AT4G15660	Stele2	Novel	1.45915e-05	OG0000136
AT5G28630	Stele2	Novel	1.43903e-05	OG0018747
AT1G68290	Stele2	Novel	1.41529e-05	OG0011131
AT1G29070	Stele2	Novel	1.41372e-05	OG0010781
AT4G40042	Stele2	Novel	1.39074e-05	OG0006100
AT4G29840	Stele2	Novel	1.33462e-05	OG0002384
AT2G46240	Stele2	Novel	1.33089e-05	OG0002491
AT3G59750	Stele2	Novel	1.29267e-05	OG0001770
AT2G28790	Stele2	Novel	1.26888e-05	OG0011563
AT1G15580	Stele2	Novel	1.24903e-05	OG0000837
AT4G15670	Stele2	Novel	1.24414e-05	OG0000136
AT4G00680	Trichoblast1	Novel	0.00284167	OG0003086
AT4G02270	Trichoblast1	Novel	0.002506	OG0005647
AT2G30930	Trichoblast1	Novel	0.00240106	OG0017984
AT4G25820	Trichoblast1	Novel	0.0022306	OG0015089
AT5G57625	Trichoblast1	Novel	0.00203508	OG0018546
AT5G67400	Trichoblast1	Novel	0.00196861	OG0000509
AT5G06630	Trichoblast1	Novel	0.00163091	OG0004415
AT3G49960	Trichoblast1	Novel	0.00157159	OG0000509
AT3G62680	Trichoblast1	Novel	0.00154944	OG0005647
AT4G25790	Trichoblast1	Novel	0.00152436	OG0018546
AT5G44610	Trichoblast1	Novel	0.00147474	OG0009323
AT5G04960	Trichoblast1	Novel	0.00137703	OG0011789
AT4G26010	Trichoblast1	Novel	0.00127008	OG0003025
AT5G57530	Trichoblast1	Novel	0.00119363	OG0015089
AT3G18780	Trichoblast1	Novel	0.00114541	OG0000071
AT4G13390	Trichoblast1	Novel	0.00108976	OG0004415
AT5G06640	Trichoblast1	Novel	0.000904686	OG0004415
AT5G43350	Trichoblast1	Novel	0.000884672	OG0000190
AT2G25240	Trichoblast1	Novel	0.000810473	OG0014782
AT1G63220	Trichoblast1	Novel	0.00076003	OG0004063
AT1G22530	Trichoblast1	Novel	0.000756077	OG0017739
AT4G08410	Trichoblast1	Novel	0.0007518	OG0004415
AT1G06923	Trichoblast1	Novel	0.000746648	OG0005843
AT2G04780	Trichoblast1	Novel	0.000728729	OG0004504
AT4G08400	Trichoblast1	Novel	0.000697915	OG0004415
AT4G22080	Trichoblast1	Novel	0.000665423	OG0010944
AT5G56550	Trichoblast1	Novel	0.00064433	OG0003681
AT2G24980	Trichoblast1	Novel	0.000613371	OG0004415
AT1G47740	Trichoblast1	Novel	0.000608297	OG0002363
AT5G53250	Trichoblast1	Novel	0.000583741	OG0000514
AT3G05490	Trichoblast1	Novel	0.000520935	OG0002297
AT1G34510	Trichoblast1	Novel	0.00051762	OG0003025
AT1G60810	Trichoblast1	Novel	0.000462935	OG0002209
AT5G26080	Trichoblast1	Novel	0.000392927	OG0008885
AT4G01110	Trichoblast1	Novel	0.000388165	OG0011273
AT5G35190	Trichoblast1	Novel	0.000373559	OG0004415
AT4G28850	Trichoblast1	Novel	0.000342216	OG0004896
AT3G60280	Trichoblast1	Novel	0.000330486	OG0008148
AT5G43620	Trichoblast1	Novel	0.000305675	OG0017946
AT1G11655	Trichoblast1	Novel	0.000302887	OG0011129
AT1G01453	Trichoblast1	Novel	0.000290602	OG0011273
AT4G30320	Trichoblast1	Novel	0.000273707	OG0012546
AT5G42510	Trichoblast1	Novel	0.000271118	OG0007464
AT5G46870	Trichoblast1	Novel	0.000270129	OG0002736
AT4G25220	Trichoblast1	Novel	0.000269868	OG0017923
AT2G20520	Trichoblast1	Novel	0.000232523	OG0002400
AT2G46860	Trichoblast1	Novel	0.000206319	OG0000287
AT4G18430	Trichoblast1	Novel	0.000200854	OG0000415
AT2G47950	Trichoblast1	Novel	0.000181619	OG0018122
AT2G44840	Trichoblast1	Novel	0.000167368	OG0001854
AT1G02570	Trichoblast1	Novel	0.000164548	OG0014644
AT5G38200	Trichoblast1	Novel	0.000142897	OG0002430
AT2G37470	Trichoblast1	Novel	0.000130915	OG0000133
AT1G01780	Trichoblast1	Novel	0.000128257	OG0010853
AT3G15500	Trichoblast1	Novel	0.000115844	OG0017876
AT1G72430	Trichoblast1	Novel	0.000115741	OG0017734
AT2G18210	Trichoblast1	Novel	0.000115525	OG0008168
AT1G67920	Trichoblast1	Novel	0.000110287	OG0007703
AT2G34330	Trichoblast1	Novel	0.000108327	OG0017754
AT5G55180	Trichoblast1	Novel	0.000107023	OG0004525
AT5G44130	Trichoblast1	Novel	9.83978e-05	OG0002400
AT1G34760	Trichoblast1	Novel	9.6668e-05	OG0017968
AT3G07490	Trichoblast1	Novel	8.70883e-05	OG0004713
AT3G14350	Trichoblast1	Novel	8.35545e-05	OG0001431
AT1G34540	Trichoblast1	Novel	7.88786e-05	OG0003030
AT1G22330	Trichoblast1	Novel	7.8466e-05	OG0005662
AT1G60050	Trichoblast1	Novel	7.21027e-05	OG0005502
AT1G69680	Trichoblast1	Novel	7.08135e-05	OG0014570
AT1G27730	Trichoblast1	Novel	6.97503e-05	OG0000325
AT3G23870	Trichoblast1	Novel	6.21339e-05	OG0006402
AT4G27280	Trichoblast1	Novel	5.70044e-05	OG0000430
AT4G33730	Trichoblast1	Novel	5.65177e-05	OG0006107
AT2G17660	Trichoblast1	Novel	5.57331e-05	OG0018117
AT5G27670	Trichoblast1	Novel	5.55043e-05	OG0000525
AT3G61190	Trichoblast1	Novel	5.39933e-05	OG0014742
AT5G66280	Trichoblast1	Novel	5.23458e-05	OG0004774
AT1G73165	Trichoblast1	Novel	5.11481e-05	OG0017720
AT4G17490	Trichoblast1	Novel	4.69555e-05	OG0018541
AT5G14800	Trichoblast1	Novel	4.61386e-05	OG0009756
AT2G24570	Trichoblast1	Novel	4.46504e-05	OG0003359
AT1G31860	Trichoblast1	Novel	4.13553e-05	OG0007416
AT3G16050	Trichoblast1	Novel	4.11129e-05	OG0018258
AT3G22540	Trichoblast1	Novel	4.07969e-05	OG0006353
AT4G11280	Trichoblast1	Novel	4.06215e-05	OG0001386
AT5G24880	Trichoblast1	Novel	3.97518e-05	OG0018696
AT2G23620	Trichoblast1	Novel	3.70889e-05	OG0000178
AT3G25250	Trichoblast1	Novel	3.37211e-05	OG0004817
AT4G04900	Trichoblast1	Novel	3.3601e-05	OG0000330
AT3G17790	Trichoblast1	Novel	3.34702e-05	OG0014890
AT2G47530	Trichoblast1	Novel	3.02536e-05	OG0005647
AT4G34930	Trichoblast1	Novel	2.91367e-05	OG0002735
AT1G52270	Trichoblast1	Novel	2.82865e-05	OG0002374
AT1G78100	Trichoblast1	Novel	2.54493e-05	OG0014559
AT1G22500	Trichoblast1	Novel	2.51087e-05	OG0010626
AT1G74940	Trichoblast1	Novel	2.48619e-05	OG0002955
AT1G55290	Trichoblast1	Novel	2.46271e-05	OG0007858
AT1G72240	Trichoblast1	Novel	2.38673e-05	OG0001787
AT5G07450	Trichoblast1	Novel	2.2371e-05	OG0005947
AT5G12030	Trichoblast1	Novel	2.22231e-05	OG0002776
AT3G59900	Trichoblast1	Novel	2.15735e-05	OG0001853
AT5G63270	Trichoblast1	Novel	2.11709e-05	OG0018340
AT1G48640	Trichoblast1	Novel	2.04624e-05	OG0000498
AT1G73500	Trichoblast1	Novel	1.98193e-05	OG0002223
AT4G35660	Trichoblast1	Novel	1.96149e-05	OG0003281
AT4G27270	Trichoblast1	Novel	1.90972e-05	OG0003628
AT5G05840	Trichoblast1	Novel	1.81643e-05	OG0003485
AT5G57540	Trichoblast1	Novel	1.73361e-05	OG0015089
AT5G41761	Trichoblast1	Novel	1.64573e-05	OG0001241
AT3G18450	Trichoblast1	Novel	1.48785e-05	OG0011059
AT1G25240	Trichoblast1	Novel	1.47595e-05	OG0001693
AT1G77870	Trichoblast1	Novel	1.36729e-05	OG0003148
AT1G69240	Trichoblast1	Novel	1.35215e-05	OG0017726
AT3G59340	Trichoblast1	Novel	1.29664e-05	OG0002639
AT2G03980	Trichoblast1	Novel	1.28779e-05	OG0018175
AT4G24570	Trichoblast1	Novel	1.2761e-05	OG0004567
AT5G61650	Trichoblast1	Novel	1.20495e-05	OG0005947
AT1G01660	Trichoblast1	Novel	1.11056e-05	OG0002380
AT1G75160	Trichoblast1	Novel	1.10443e-05	OG0014452
AT5G23160	Trichoblast1	Novel	1.09216e-05	OG0006735
AT3G11020	Trichoblast1	Novel	1.06848e-05	OG0018406
AT4G33070	Trichoblast1	Novel	9.40872e-06	OG0000522
AT1G16440	Trichoblast1	Novel	9.40058e-06	OG0003006
AT4G20980	Trichoblast1	Novel	8.74332e-06	OG0004900
AT5G59410	Trichoblast1	Novel	7.71291e-06	OG0008137
AT5G45580	Trichoblast1	Novel	7.56839e-06	OG0003756
AT3G12830	Trichoblast1	Novel	6.81233e-06	OG0001714
AT3G07600	Trichoblast1	Novel	6.56337e-06	OG0000162
AT2G24970	Trichoblast1	Novel	6.02351e-06	OG0011376
AT4G37090	Trichoblast1	Novel	4.95032e-06	OG0009034
AT3G20557	Trichoblast1	Novel	4.83695e-06	OG0002206
AT1G63450	Trichoblast1	Novel	4.74886e-06	OG0010723
AT5G01050	Trichoblast1	Novel	4.08615e-06	OG0018664
AT5G65158	Trichoblast1	Novel	4.04938e-06	OG0018765
AT1G47610	Trichoblast1	Novel	3.5214e-06	OG0000479
AT5G24190	Trichoblast1	Novel	3.43814e-06	OG0006986
AT1G25422	Trichoblast1	Novel	3.35709e-06	OG0014678
AT1G76210	Trichoblast1	Novel	3.21872e-06	OG0010608
AT1G08090	Trichoblast1	Novel	3.08438e-06	OG0001776
AT5G41280	Trichoblast1	Novel	2.92037e-06	OG0001694
AT5G54050	Trichoblast1	Novel	2.80118e-06	OG0000034
AT5G54790	Trichoblast1	Novel	2.2962e-06	OG0004832
AT5G23990	Trichoblast1	Novel	2.06962e-06	OG0000865
AT1G80620	Trichoblast1	Novel	1.96584e-06	OG0003152
AT5G61850	Trichoblast1	Novel	1.80331e-06	OG0009360
AT3G46900	Trichoblast1	Novel	1.70597e-06	OG0000898
AT4G00130	Trichoblast1	Novel	1.60084e-06	OG0000279
AT1G13080	Trichoblast1	Novel	1.21743e-06	OG0000187
AT3G10560	Trichoblast1	Novel	9.44078e-07	OG0003455
AT3G46090	Trichoblast1	Novel	8.91114e-07	OG0006077
AT2G21610	Trichoblast1	Novel	7.98709e-07	OG0008323
AT5G16330	Trichoblast1	Novel	4.42025e-07	OG0006212
AT1G11920	Trichoblast1	Novel	4.2805e-07	OG0010944
AT4G30140	Trichoblast1	Novel	3.61193e-07	OG0011469
AT2G34910	Trichoblast2	Novel	0.00530377	OG0003155
AT4G40090	Trichoblast2	Novel	0.0040478	OG0011617
AT4G34580	Trichoblast2	Novel	0.00386486	OG0001117
AT1G27740	Trichoblast2	Novel	0.00381498	OG0004151
AT2G41970	Trichoblast2	Novel	0.00365225	OG0003307
AT1G62980	Trichoblast2	Novel	0.00358307	OG0007946
AT5G05500	Trichoblast2	Novel	0.00353408	OG0013196
AT1G58270	Trichoblast2	Novel	0.00351399	OG0000112
AT2G01540	Trichoblast2	Novel	0.00335718	OG0017683
AT3G07880	Trichoblast2	Novel	0.00321163	OG0001407
AT3G09925	Trichoblast2	Novel	0.00315719	OG0014922
AT3G61560	Trichoblast2	Novel	0.00311103	OG0000609
AT1G12560	Trichoblast2	Novel	0.0030685	OG0007946
AT1G01750	Trichoblast2	Novel	0.00293478	OG0003086
AT5G17820	Trichoblast2	Novel	0.00290139	OG0003025
AT5G58010	Trichoblast2	Novel	0.00282528	OG0009407
AT1G30870	Trichoblast2	Novel	0.00281097	OG0011021
AT4G01480	Trichoblast2	Novel	0.00274913	OG0000287
AT5G40510	Trichoblast2	Novel	0.002674	OG0011730
AT2G47650	Trichoblast2	Novel	0.0026355	OG0000515
AT3G54590	Trichoblast2	Novel	0.00257707	OG0010768
AT3G54580	Trichoblast2	Novel	0.00244866	OG0010768
AT5G40860	Trichoblast2	Novel	0.00240366	OG0004812
AT3G23190	Trichoblast2	Novel	0.00219503	OG0018332
AT4G09990	Trichoblast2	Novel	0.00211527	OG0001292
AT1G35670	Trichoblast2	Novel	0.0020981	OG0001368
AT4G34050	Trichoblast2	Novel	0.00206376	OG0003618
AT4G00460	Trichoblast2	Novel	0.00198139	OG0007857
AT2G04170	Trichoblast2	Novel	0.0019422	OG0000112
AT1G23750	Trichoblast2	Novel	0.00187034	OG0005531
AT2G43820	Trichoblast2	Novel	0.00184555	OG0000331
AT3G60330	Trichoblast2	Novel	0.00184365	OG0000087
AT3G21180	Trichoblast2	Novel	0.00177576	OG0001526
AT4G29180	Trichoblast2	Novel	0.00165416	OG0000042
AT1G70460	Trichoblast2	Novel	0.00161076	OG0000825
AT3G19390	Trichoblast2	Novel	0.00150728	OG0014880
AT1G73860	Trichoblast2	Novel	0.00143412	OG0000831
AT3G12540	Trichoblast2	Novel	0.00142325	OG0006103
AT5G41080	Trichoblast2	Novel	0.00124521	OG0006447
AT1G48930	Trichoblast2	Novel	0.00116453	OG0011073
AT5G54490	Trichoblast2	Novel	0.00114344	OG0000430
AT3G17390	Trichoblast2	Novel	0.00111344	OG0000723
AT1G30850	Trichoblast2	Novel	0.00106344	OG0003155
AT4G33467	Trichoblast2	Novel	0.00106209	OG0009325
AT5G43580	Trichoblast2	Novel	0.00104393	OG0000106
AT2G32380	Trichoblast2	Novel	0.000912969	OG0002327
AT1G08340	Trichoblast2	Novel	0.000911298	OG0003102
AT4G22666	Trichoblast2	Novel	0.000894635	OG0012283
AT5G65930	Trichoblast2	Novel	0.000888484	OG0009886
AT4G19230	Trichoblast2	Novel	0.000852595	OG0004958
AT4G30560	Trichoblast2	Novel	0.000852159	OG0001287
AT3G47340	Trichoblast2	Novel	0.000832352	OG0001939
AT5G22410	Trichoblast2	Novel	0.000814678	OG0002774
AT4G24026	Trichoblast2	Novel	0.000722792	OG0002740
AT3G22570	Trichoblast2	Novel	0.000720479	OG0000426
AT2G38500	Trichoblast2	Novel	0.0007189	OG0014840
AT2G31350	Trichoblast2	Novel	0.000718669	OG0005764
AT2G39110	Trichoblast2	Novel	0.000695277	OG0002484
AT1G04280	Trichoblast2	Novel	0.000632466	OG0001033
AT4G15610	Trichoblast2	Novel	0.000626791	OG0006439
AT5G54640	Trichoblast2	Novel	0.000626262	OG0001293
AT2G34500	Trichoblast2	Novel	0.000616486	OG0001887
AT5G13080	Trichoblast2	Novel	0.000592968	OG0003424
AT2G47540	Trichoblast2	Novel	0.000592938	OG0005647
AT2G38790	Trichoblast2	Novel	0.000592607	OG0014781
AT1G05810	Trichoblast2	Novel	0.000586885	OG0002431
AT5G14470	Trichoblast2	Novel	0.000575474	OG0008876
AT1G58190	Trichoblast2	Novel	0.000522243	OG0001815
AT5G23030	Trichoblast2	Novel	0.000512132	OG0017859
AT3G54040	Trichoblast2	Novel	0.000506255	OG0002004
AT5G67480	Trichoblast2	Novel	0.000491813	OG0015032
AT2G27080	Trichoblast2	Novel	0.000479758	OG0005934
AT1G25400	Trichoblast2	Novel	0.000479089	OG0011039
AT1G13950	Trichoblast2	Novel	0.000468958	OG0000710
AT2G20670	Trichoblast2	Novel	0.000452503	OG0003242
AT2G03720	Trichoblast2	Novel	0.000435594	OG0002980
AT5G17390	Trichoblast2	Novel	0.000434966	OG0018226
AT4G33666	Trichoblast2	Novel	0.000425642	OG0018074
AT1G21360	Trichoblast2	Novel	0.000422116	OG0007475
AT5G66650	Trichoblast2	Novel	0.000395607	OG0001848
AT1G14170	Trichoblast2	Novel	0.000381065	OG0018037
AT2G20880	Trichoblast2	Novel	0.000380388	OG0002472
AT3G05170	Trichoblast2	Novel	0.000380163	OG0004125
AT4G31250	Trichoblast2	Novel	0.000366066	OG0001046
AT2G32270	Trichoblast2	Novel	0.000361873	OG0001371
AT5G15230	Trichoblast2	Novel	0.00033616	OG0000370
AT2G29620	Trichoblast2	Novel	0.000330966	OG0010610
AT1G13245	Trichoblast2	Novel	0.000330312	OG0000477
AT1G54970	Trichoblast2	Novel	0.000323708	OG0005647
AT1G54290	Trichoblast2	Novel	0.000322696	OG0000565
AT3G56930	Trichoblast2	Novel	0.000298634	OG0003258
AT5G01280	Trichoblast2	Novel	0.000296016	OG0001871
AT1G15010	Trichoblast2	Novel	0.000293793	OG0003207
AT5G22920	Trichoblast2	Novel	0.000273074	OG0001230
AT3G20410	Trichoblast2	Novel	0.000270155	OG0000362
AT1G52890	Trichoblast2	Novel	0.000261639	OG0017876
AT2G47360	Trichoblast2	Novel	0.000259339	OG0014644
AT1G01140	Trichoblast2	Novel	0.000254638	OG0008031
AT5G53970	Trichoblast2	Novel	0.000253346	OG0005006
AT3G46080	Trichoblast2	Novel	0.000252363	OG0006077
AT5G65390	Trichoblast2	Novel	0.00024616	OG0011617
AT3G52290	Trichoblast2	Novel	0.000238387	OG0001162
AT2G45750	Trichoblast2	Novel	0.000238309	OG0002403
AT5G65090	Trichoblast2	Novel	0.000238053	OG0009757
AT5G24310	Trichoblast2	Novel	0.000226534	OG0003428
AT3G50260	Trichoblast2	Novel	0.000225316	OG0000489
AT1G65610	Trichoblast2	Novel	0.000224737	OG0007424
AT5G65690	Trichoblast2	Novel	0.000224355	OG0004927
AT3G07070	Trichoblast2	Novel	0.000223665	OG0003128
AT2G19060	Trichoblast2	Novel	0.000219718	OG0011469
AT3G06300	Trichoblast2	Novel	0.000213418	OG0006430
AT1G56550	Trichoblast2	Novel	0.000209901	OG0003018
AT3G19615	Trichoblast2	Novel	0.000203051	OG0015024
AT2G40340	Trichoblast2	Novel	0.000201848	OG0004486
AT5G13500	Trichoblast2	Novel	0.000193398	OG0003746
AT1G70440	Trichoblast2	Novel	0.00019254	OG0001311
AT1G73580	Trichoblast2	Novel	0.000192098	OG0000249
AT3G16390	Trichoblast2	Novel	0.000188775	OG0005837
AT3G14260	Trichoblast2	Novel	0.000188308	OG0000563
AT3G17780	Trichoblast2	Novel	0.000182605	OG0007975
AT1G52240	Trichoblast2	Novel	0.000178834	OG0017911
AT5G49270	Trichoblast2	Novel	0.000162535	OG0002683
AT4G01700	Trichoblast2	Novel	0.00015853	OG0005713
AT2G16660	Trichoblast2	Novel	0.000157547	OG0001876
AT1G53680	Trichoblast2	Novel	0.000156506	OG0000158
AT1G65510	Trichoblast2	Novel	0.000154261	OG0010553
AT4G30460	Trichoblast2	Novel	0.000152695	OG0006629
AT5G47230	Trichoblast2	Novel	0.00014992	OG0018541
AT5G47450	Trichoblast2	Novel	0.00014929	OG0000929
AT3G53650	Trichoblast2	Novel	0.000147431	OG0000133
AT2G33460	Trichoblast2	Novel	0.000146334	OG0017755
AT5G47740	Trichoblast2	Novel	0.00014532	OG0005146
AT1G19360	Trichoblast2	Novel	0.000140957	OG0002205
AT1G19200	Trichoblast2	Novel	0.000134024	OG0002955
AT2G39570	Trichoblast2	Novel	0.00013103	OG0008421
AT3G61060	Trichoblast2	Novel	0.000130954	OG0004625
AT4G39675	Trichoblast2	Novel	0.000124175	OG0014766
AT1G08990	Trichoblast2	Novel	0.000121923	OG0010822
AT5G42380	Trichoblast2	Novel	0.000121207	OG0000871
AT5G16510	Trichoblast2	Novel	0.000120404	OG0006767
AT3G53730	Trichoblast2	Novel	0.000117018	OG0000056
AT3G04420	Trichoblast2	Novel	0.000116472	OG0005599
AT1G27140	Trichoblast2	Novel	0.000110748	OG0010699
AT4G33880	Trichoblast2	Novel	0.000109244	OG0018223
AT3G51540	Trichoblast2	Novel	0.000108683	OG0014900
AT5G20250	Trichoblast2	Novel	0.000107204	OG0013297
AT5G13990	Trichoblast2	Novel	0.000107085	OG0001577
AT5G45630	Trichoblast2	Novel	0.00010547	OG0004028
AT4G34131	Trichoblast2	Novel	0.00010151	OG0003306
AT5G20150	Trichoblast2	Novel	0.000100446	OG0005952
AT1G66470	Trichoblast2	Novel	0.000100445	OG0007936
AT2G18876	Trichoblast2	Novel	0.00010019	OG0008196
AT4G09570	Trichoblast2	Novel	0.000100175	OG0001368
AT5G11440	Trichoblast2	Novel	0.000100007	OG0015160
AT1G26910	Trichoblast2	Novel	9.6117e-05	OG0003020
AT3G04060	Trichoblast2	Novel	9.56271e-05	OG0000378
AT1G17147	Trichoblast2	Novel	9.46193e-05	OG0000727
AT5G38700	Trichoblast2	Novel	9.3828e-05	OG0003656
AT1G30990	Trichoblast2	Novel	9.37687e-05	OG0000678
AT2G30020	Trichoblast2	Novel	9.26712e-05	OG0001039
AT1G49660	Trichoblast2	Novel	9.16549e-05	OG0000811
AT4G22214	Trichoblast2	Novel	9.1181e-05	OG0006544
AT5G09430	Trichoblast2	Novel	8.96431e-05	OG0001795
AT4G37640	Trichoblast2	Novel	8.95882e-05	OG0000718
AT2G17880	Trichoblast2	Novel	8.77186e-05	OG0001123
AT5G06990	Trichoblast2	Novel	8.68782e-05	OG0012906
AT1G12040	Trichoblast2	Novel	8.35757e-05	OG0005760
AT2G41730	Trichoblast2	Novel	8.29431e-05	OG0014797
AT3G18560	Trichoblast2	Novel	8.05347e-05	OG0001394
AT5G20885	Trichoblast2	Novel	8.03322e-05	OG0018368
AT1G51060	Trichoblast2	Novel	7.94959e-05	OG0001293
AT3G53370	Trichoblast2	Novel	7.78341e-05	OG0002496
AT4G36880	Trichoblast2	Novel	7.70969e-05	OG0012416
AT2G39518	Trichoblast2	Novel	7.65901e-05	OG0001134
AT3G15356	Trichoblast2	Novel	7.48393e-05	OG0005469
AT2G03350	Trichoblast2	Novel	7.44821e-05	OG0005913
AT5G46230	Trichoblast2	Novel	7.36715e-05	OG0000116
AT1G53920	Trichoblast2	Novel	7.13323e-05	OG0017763
AT1G16000	Trichoblast2	Novel	7.09812e-05	OG0004010
AT3G02040	Trichoblast2	Novel	6.93952e-05	OG0006447
AT5G23395	Trichoblast2	Novel	6.69676e-05	OG0009633
AT2G31020	Trichoblast2	Novel	6.30193e-05	OG0005415
AT5G60800	Trichoblast2	Novel	6.19717e-05	OG0000757
AT1G67070	Trichoblast2	Novel	6.06329e-05	OG0003208
AT5G50200	Trichoblast2	Novel	5.89928e-05	OG0005038
AT4G19680	Trichoblast2	Novel	5.84943e-05	OG0001744
AT4G17100	Trichoblast2	Novel	5.83765e-05	OG0002054
AT3G15540	Trichoblast2	Novel	5.81223e-05	OG0014590
AT2G36410	Trichoblast2	Novel	5.76844e-05	OG0001148
AT4G22758	Trichoblast2	Novel	5.67235e-05	OG0009335
AT1G80160	Trichoblast2	Novel	5.65063e-05	OG0000842
AT1G80180	Trichoblast2	Novel	5.5078e-05	OG0001718
AT1G33090	Trichoblast2	Novel	5.49506e-05	OG0000588
AT5G55730	Trichoblast2	Novel	5.47544e-05	OG0000952
AT4G15390	Trichoblast2	Novel	5.4407e-05	OG0003159
AT4G01360	Trichoblast2	Novel	5.40201e-05	OG0002381
AT3G43960	Trichoblast2	Novel	5.36059e-05	OG0014880
AT5G13200	Trichoblast2	Novel	5.33804e-05	OG0009578
AT2G17710	Trichoblast2	Novel	5.33395e-05	OG0011517
AT5G54100	Trichoblast2	Novel	5.23676e-05	OG0002012
AT1G68810	Xylem	Novel	0.00313967	OG0005437
AT3G51030	Xylem	Novel	0.00303601	OG0006220
AT4G36160	Xylem	Novel	0.00253096	OG0000146
AT4G18640	Xylem	Novel	0.00210058	OG0002046
AT5G08370	Xylem	Novel	0.00186964	OG0000968
AT5G03170	Xylem	Novel	0.00175679	OG0003708
AT4G28140	Xylem	Novel	0.00167905	OG0002472
AT5G66300	Xylem	Novel	0.00144826	OG0000146
AT4G23690	Xylem	Novel	0.00137363	OG0001069
AT2G04850	Xylem	Novel	0.00121138	OG0011478
AT5G02640	Xylem	Novel	0.00107024	OG0009507
AT5G59290	Xylem	Novel	0.00104897	OG0001906
AT3G21270	Xylem	Novel	0.000997449	OG0000571
AT1G12260	Xylem	Novel	0.000951835	OG0000146
AT2G40320	Xylem	Novel	0.000879932	OG0003319
AT5G60490	Xylem	Novel	0.000864184	OG0003708
AT5G50950	Xylem	Novel	0.000857392	OG0008193
AT1G62981	Xylem	Novel	0.000798267	OG0005856
AT5G15490	Xylem	Novel	0.000773998	OG0000569
AT5G53830	Xylem	Novel	0.000682656	OG0001398
AT4G23670	Xylem	Novel	0.000600866	OG0000678
AT1G14890	Xylem	Novel	0.000576945	OG0014444
AT1G79620	Xylem	Novel	0.000568862	OG0010741
AT3G18660	Xylem	Novel	0.000546732	OG0001723
AT4G33120	Xylem	Novel	0.000541623	OG0002749
AT3G17600	Xylem	Novel	0.000538538	OG0011771
AT5G19530	Xylem	Novel	0.000529388	OG0015159
AT4G35350	Xylem	Novel	0.000518613	OG0001727
AT3G10080	Xylem	Novel	0.00050218	OG0011922
AT4G23680	Xylem	Novel	0.000481484	OG0000678
AT3G55990	Xylem	Novel	0.000466	OG0000902
AT5G66920	Xylem	Novel	0.000450861	OG0009381
AT2G35760	Xylem	Novel	0.000450685	OG0011628
AT5G16490	Xylem	Novel	0.000427335	OG0018628
AT1G12780	Xylem	Novel	0.000414126	OG0005443
AT5G67230	Xylem	Novel	0.000399281	OG0004902
AT3G25710	Xylem	Novel	0.000392962	OG0005437
AT1G71930	Xylem	Novel	0.000392795	OG0000146
AT2G28315	Xylem	Novel	0.000392738	OG0008357
AT2G37750	Xylem	Novel	0.000384223	OG0002470
AT2G21540	Xylem	Novel	0.000381538	OG0001117
AT5G01070	Xylem	Novel	0.000356757	OG0001592
AT3G27200	Xylem	Novel	0.000332741	OG0012157
AT2G15830	Xylem	Novel	0.000331298	OG0010614
AT3G62020	Xylem	Novel	0.000322975	OG0001289
AT4G09890	Xylem	Novel	0.000322413	OG0008998
AT4G08685	Xylem	Novel	0.000321404	OG0002320
AT2G39400	Xylem	Novel	0.000320848	OG0004419
AT3G18280	Xylem	Novel	0.00031429	OG0001811
AT2G46760	Xylem	Novel	0.000294812	OG0002299
AT3G56170	Xylem	Novel	0.000291577	OG0004593
AT1G68795	Xylem	Novel	0.000286231	OG0004017
AT2G37210	Xylem	Novel	0.000282254	OG0000428
AT5G12870	Xylem	Novel	0.00027209	OG0009597
AT1G75280	Xylem	Novel	0.000271305	OG0000581
AT3G54260	Xylem	Novel	0.000271163	OG0018363
AT2G19810	Xylem	Novel	0.00026883	OG0000512
AT3G06035	Xylem	Novel	0.000261936	OG0003416
AT3G12110	Xylem	Novel	0.000260969	OG0000071
AT3G17660	Xylem	Novel	0.00025856	OG0018264
AT2G31360	Xylem	Novel	0.000253007	OG0003192
AT5G17420	Xylem	Novel	0.000250461	OG0009397
AT3G47400	Xylem	Novel	0.000243679	OG0008693
AT5G01360	Xylem	Novel	0.000239341	OG0009539
[truncated: 136 more rows]

## Sheet: ATH_SVM
Marker_Genes	Clusters	Novel	SVM_values	Orthogroup
AT4G12550	Atrichoblast1	Novel	0.0109553	OG0015071
AT4G12545	Atrichoblast1	Novel	0.0100069	OG0015071
AT1G14960	Atrichoblast1	Novel	0.00897177	OG0000678
AT1G65310	Atrichoblast1	Novel	0.00810397	OG0010871
AT1G70850	Atrichoblast1	Novel	0.00798305	OG0000813
AT2G29500	Atrichoblast1	Novel	0.00752837	OG0000557
AT2G43590	Atrichoblast1	Novel	0.00746598	OG0001138
AT2G37130	Atrichoblast1	Novel	0.00737309	OG0011420
AT3G46230	Atrichoblast1	Novel	0.00703106	OG0000870
AT5G64100	Atrichoblast1	Novel	0.00683568	OG0018710
AT3G29250	Atrichoblast1	Novel	0.0062946	OG0001440
AT2G46740	Atrichoblast1	Novel	0.00618827	OG0002299
AT3G09260	Atrichoblast1	Novel	0.00617943	OG0001305
AT5G12030	Atrichoblast1	Novel	0.00571157	OG0002776
AT2G38870	Atrichoblast1	Novel	0.00556499	OG0000106
AT4G34050	Atrichoblast1	Novel	0.00552262	OG0003618
AT2G39040	Atrichoblast1	Novel	0.00552075	OG0001142
AT4G23400	Atrichoblast1	Novel	0.00541299	OG0000416
AT5G16010	Atrichoblast1	Novel	0.00537086	OG0003695
AT5G07460	Atrichoblast1	Novel	0.00536675	OG0002729
AT3G16420	Atrichoblast1	Novel	0.00535466	OG0000083
AT2G17500	Atrichoblast1	Novel	0.00531414	OG0000887
AT2G39530	Atrichoblast1	Novel	0.00510998	OG0001134
AT1G07400	Atrichoblast1	Novel	0.00502905	OG0000557
AT4G30280	Atrichoblast1	Novel	0.0050083	OG0010871
AT1G73260	Atrichoblast1	Novel	0.00492509	OG0001314
AT1G78830	Atrichoblast1	Novel	0.00487213	OG0003129
AT3G04720	Atrichoblast1	Novel	0.0048584	OG0001545
AT1G33140	Atrichoblast1	Novel	0.00481423	OG0000591
AT5G48010	Atrichoblast1	Novel	0.00479974	OG0004267
AT4G21840	Atrichoblast1	Novel	0.00470194	OG0018564
AT4G37010	Atrichoblast1	Novel	0.00463758	OG0008577
AT4G20780	Atrichoblast1	Novel	0.00462274	OG0002032
AT1G20190	Atrichoblast1	Novel	0.00454884	OG0002396
AT1G23720	Atrichoblast1	Novel	0.0045426	OG0010768
AT4G27090	Atrichoblast1	Novel	0.00448782	OG0002550
AT3G29035	Atrichoblast1	Novel	0.00447004	OG0000378
AT2G16600	Atrichoblast1	Novel	0.00446122	OG0001113
AT3G52590	Atrichoblast1	Novel	0.00444302	OG0003390
AT3G23810	Atrichoblast1	Novel	0.00441463	OG0006218
AT5G11070	Atrichoblast1	Novel	0.00438005	OG0002532
AT5G04120	Atrichoblast1	Novel	0.00433146	OG0008533
AT5G12020	Atrichoblast1	Novel	0.00432472	OG0002776
AT1G06120	Atrichoblast1	Novel	0.0043018	OG0003192
AT5G45280	Atrichoblast1	Novel	0.0042979	OG0009044
AT4G34230	Atrichoblast1	Novel	0.00427524	OG0009119
AT1G19020	Atrichoblast1	Novel	0.00425939	OG0000858
AT2G29995	Atrichoblast1	Novel	0.00425121	OG0011268
AT4G34870	Atrichoblast1	Novel	0.00421897	OG0001113
AT3G28740	Atrichoblast1	Novel	0.00414264	OG0000135
AT5G43580	Atrichoblast1	Novel	0.00412318	OG0000106
AT3G14260	Atrichoblast1	Novel	0.00409036	OG0000563
AT4G17340	Atrichoblast1	Novel	0.00408576	OG0000929
AT1G80240	Atrichoblast1	Novel	0.004079	OG0001729
AT5G44380	Atrichoblast1	Novel	0.00405831	OG0011400
AT5G46900	Atrichoblast1	Novel	0.00397497	OG0003760
AT5G24140	Atrichoblast1	Novel	0.00396636	OG0013151
AT4G14560	Atrichoblast1	Novel	0.00396233	OG0000837
AT5G23840	Atrichoblast1	Novel	0.00394775	OG0004134
AT3G19820	Atrichoblast1	Novel	0.00394094	OG0008904
AT3G04400	Atrichoblast1	Novel	0.00393409	OG0000832
AT3G14850	Atrichoblast1	Novel	0.00393316	OG0014929
AT2G32120	Atrichoblast1	Novel	0.00391566	OG0011666
AT1G65290	Atrichoblast1	Novel	0.00391395	OG0002306
AT4G25830	Atrichoblast1	Novel	0.00390145	OG0004908
AT2G16005	Atrichoblast1	Novel	0.00389445	OG0004134
AT5G55970	Atrichoblast1	Novel	0.00388722	OG0004869
AT1G72800	Atrichoblast1	Novel	0.00388476	OG0001800
AT4G19230	Atrichoblast1	Novel	0.00379666	OG0004958
AT5G60390	Atrichoblast1	Novel	0.00379364	OG0000174
AT5G19510	Atrichoblast1	Novel	0.00378897	OG0009419
AT3G15500	Atrichoblast1	Novel	0.00377801	OG0017876
AT5G62300	Atrichoblast1	Novel	0.00370119	OG0003432
AT4G20860	Atrichoblast1	Novel	0.00367921	OG0003627
AT3G19660	Atrichoblast1	Novel	0.00366885	OG0008778
AT4G39200	Atrichoblast1	Novel	0.00366228	OG0003344
AT1G78000	Atrichoblast1	Novel	0.00364341	OG0002322
AT1G67920	Atrichoblast1	Novel	0.00364029	OG0007703
AT2G22760	Atrichoblast1	Novel	0.00361788	OG0018071
AT4G37390	Atrichoblast1	Novel	0.00360625	OG0000568
AT5G26660	Atrichoblast1	Novel	0.00360428	OG0009445
AT2G31020	Atrichoblast1	Novel	0.00360207	OG0005415
AT2G26370	Atrichoblast1	Novel	0.00358387	OG0004134
AT3G13650	Atrichoblast1	Novel	0.00354158	OG0007716
AT1G74310	Atrichoblast1	Novel	0.00351491	OG0004338
AT5G39610	Atrichoblast1	Novel	0.00351288	OG0000378
AT5G40780	Atrichoblast1	Novel	0.00342592	OG0000498
AT3G19030	Atrichoblast1	Novel	0.0034093	OG0010614
AT1G67430	Atrichoblast1	Novel	0.00340045	OG0004105
AT5G15200	Atrichoblast1	Novel	0.00339147	OG0002811
AT2G16660	Atrichoblast1	Novel	0.00337889	OG0001876
AT1G54050	Atrichoblast1	Novel	0.00337659	OG0003057
AT1G51420	Atrichoblast1	Novel	0.00336115	OG0003081
AT1G77940	Atrichoblast1	Novel	0.00335619	OG0001745
AT4G37530	Atrichoblast1	Novel	0.0033462	OG0000509
AT1G10370	Atrichoblast1	Novel	0.00334282	OG0001082
AT4G29905	Atrichoblast1	Novel	0.00334071	OG0000782
AT2G39110	Atrichoblast1	Novel	0.00333926	OG0002484
AT1G59860	Atrichoblast1	Novel	0.00333849	OG0000557
AT3G01190	Atrichoblast1	Novel	0.00333727	OG0000773
AT5G66650	Atrichoblast1	Novel	0.00333337	OG0001848
AT4G37410	Atrichoblast1	Novel	0.00331979	OG0000135
AT1G52890	Atrichoblast1	Novel	0.00331232	OG0017876
AT1G69620	Atrichoblast1	Novel	0.00331176	OG0001328
AT5G08240	Atrichoblast1	Novel	0.00331064	OG0006735
AT4G18100	Atrichoblast1	Novel	0.00330631	OG0003604
AT1G07770	Atrichoblast1	Novel	0.0032909	OG0001792
AT5G25450	Atrichoblast1	Novel	0.00329025	OG0003664
AT2G47770	Atrichoblast1	Novel	0.0032759	OG0008281
AT2G47180	Atrichoblast1	Novel	0.00327469	OG0005901
AT3G29780	Atrichoblast1	Novel	0.00327386	OG0014892
AT5G06839	Atrichoblast1	Novel	0.00326615	OG0005144
AT1G57990	Atrichoblast1	Novel	0.00325115	OG0004053
AT1G49500	Atrichoblast1	Novel	0.00325109	OG0010614
AT3G57020	Atrichoblast1	Novel	0.00324282	OG0000495
AT5G18380	Atrichoblast1	Novel	0.0032409	OG0001485
AT4G15760	Atrichoblast1	Novel	0.00319284	OG0003673
AT1G17880	Atrichoblast1	Novel	0.00318803	OG0000821
AT5G38700	Atrichoblast1	Novel	0.00317491	OG0003656
AT4G02290	Atrichoblast1	Novel	0.00316795	OG0012528
AT5G46890	Atrichoblast1	Novel	0.00316021	OG0003760
AT5G52640	Atrichoblast1	Novel	0.0031579	OG0000643
AT5G13080	Atrichoblast1	Novel	0.00315172	OG0003424
AT2G16720	Atrichoblast1	Novel	0.00314994	OG0018189
AT4G33865	Atrichoblast1	Novel	0.00314761	OG0001956
AT4G16190	Atrichoblast1	Novel	0.00312857	OG0002564
AT1G18980	Atrichoblast1	Novel	0.0031046	OG0002221
AT2G45220	Atrichoblast1	Novel	0.00310092	OG0018138
AT2G04160	Atrichoblast1	Novel	0.00309816	OG0001894
AT5G19240	Atrichoblast1	Novel	0.00308004	OG0003416
AT5G63150	Atrichoblast1	Novel	0.00307716	OG0009602
AT5G23510	Atrichoblast1	Novel	0.00307618	OG0003691
AT2G01670	Atrichoblast1	Novel	0.00307173	OG0001299
AT2G40510	Atrichoblast1	Novel	0.00306283	OG0002481
AT5G26340	Atrichoblast1	Novel	0.00305808	OG0012819
AT1G33120	Atrichoblast1	Novel	0.00305019	OG0000591
AT5G48657	Atrichoblast1	Novel	0.00303491	OG0018324
AT2G44490	Atrichoblast1	Novel	0.0030342	OG0001305
AT5G56870	Atrichoblast1	Novel	0.00301804	OG0006472
AT5G42600	Atrichoblast1	Novel	0.00300424	OG0004267
AT2G30620	Atrichoblast1	Novel	0.0029999	OG0017948
AT2G20080	Atrichoblast1	Novel	0.00299988	OG0002506
AT1G44608	Atrichoblast1	Novel	0.00299719	OG0002992
AT2G05220	Atrichoblast1	Novel	0.00298725	OG0001913
AT4G17390	Atrichoblast1	Novel	0.00298483	OG0001567
AT5G55190	Atrichoblast1	Novel	0.00296891	OG0002797
AT3G05590	Atrichoblast1	Novel	0.00295631	OG0002614
AT5G40690	Atrichoblast1	Novel	0.00293934	OG0012865
AT1G01140	Atrichoblast1	Novel	0.00293059	OG0008031
AT3G60690	Atrichoblast1	Novel	0.00292856	OG0001889
AT5G58710	Atrichoblast1	Novel	0.00292294	OG0006059
AT1G30230	Atrichoblast1	Novel	0.00291872	OG0004358
AT1G56070	Atrichoblast1	Novel	0.00291361	OG0001740
AT2G21660	Atrichoblast1	Novel	0.00290875	OG0001140
AT5G48850	Atrichoblast1	Novel	0.00290619	OG0002304
AT5G48540	Atrichoblast1	Novel	0.00290588	OG0002770
AT5G17760	Atrichoblast1	Novel	0.00290469	OG0006182
AT2G38470	Atrichoblast1	Novel	0.00289249	OG0002541
AT1G53830	Atrichoblast1	Novel	0.00288709	OG0002252
AT3G56170	Atrichoblast1	Novel	0.00286209	OG0004593
AT5G52650	Atrichoblast1	Novel	0.00285883	OG0001208
AT5G39050	Atrichoblast1	Novel	0.00285867	OG0001522
AT3G61190	Atrichoblast1	Novel	0.00284707	OG0014742
AT1G07930	Atrichoblast1	Novel	0.00283054	OG0000174
AT1G43670	Atrichoblast1	Novel	0.00282837	OG0005816
AT3G11940	Atrichoblast1	Novel	0.00282508	OG0003292
AT1G49660	Atrichoblast1	Novel	0.00282503	OG0000811
AT4G09460	Atrichoblast1	Novel	0.00281639	OG0007955
AT1G11670	Atrichoblast1	Novel	0.0028054	OG0017870
AT3G60520	Atrichoblast1	Novel	0.00280078	OG0001754
AT1G52600	Atrichoblast1	Novel	0.00279246	OG0004221
AT4G29735	Atrichoblast1	Novel	0.00278397	OG0012616
AT3G01290	Atrichoblast1	Novel	0.00278016	OG0000491
AT3G16400	Atrichoblast1	Novel	0.00277416	OG0005837
AT5G06660	Atrichoblast1	Novel	0.00276718	OG0004652
AT2G21160	Atrichoblast1	Novel	0.00275552	OG0003254
AT3G23560	Atrichoblast1	Novel	0.00275099	OG0001189
AT5G52020	Atrichoblast1	Novel	0.00274475	OG0000554
AT5G56030	Atrichoblast1	Novel	0.00274262	OG0000643
AT1G60190	Atrichoblast1	Novel	0.00273474	OG0003079
AT3G03780	Atrichoblast1	Novel	0.00270915	OG0001499
AT1G52070	Atrichoblast1	Novel	0.00269172	OG0000083
AT4G33250	Atrichoblast1	Novel	0.00268954	OG0012484
AT1G52342	Atrichoblast1	Novel	0.00268826	OG0000329
AT3G24830	Atrichoblast1	Novel	0.00268641	OG0002612
AT5G66780	Atrichoblast1	Novel	0.00267706	OG0009361
AT5G47700	Atrichoblast1	Novel	0.00263051	OG0014637
AT1G14320	Atrichoblast1	Novel	0.00262401	OG0003020
AT3G50260	Atrichoblast1	Novel	0.002619	OG0000489
AT2G34480	Atrichoblast1	Novel	0.00260854	OG0001732
AT3G04630	Atrichoblast1	Novel	0.00260805	OG0001155
AT1G37130	Atrichoblast1	Novel	0.00259909	OG0002231
AT1G27435	Atrichoblast1	Novel	0.00259904	OG0010936
AT1G78100	Atrichoblast1	Novel	0.00258393	OG0014559
AT5G27850	Atrichoblast1	Novel	0.00256906	OG0002614
AT3G05390	Atrichoblast1	Novel	0.00256426	OG0008566
AT3G14770	Atrichoblast1	Novel	0.00255596	OG0004666
AT1G43170	Atrichoblast1	Novel	0.00255498	OG0001061
AT3G44860	Atrichoblast1	Novel	0.0025546	OG0001818
AT1G22400	Atrichoblast1	Novel	0.00254638	OG0000487
AT2G33790	Atrichoblast2	Novel	0.0116956	OG0000418
AT2G41800	Atrichoblast2	Novel	0.00761768	OG0011432
AT1G05680	Atrichoblast2	Novel	0.00753167	OG0011208
AT4G19030	Atrichoblast2	Novel	0.00712587	OG0002542
AT1G28290	Atrichoblast2	Novel	0.00712	OG0000418
AT4G38740	Atrichoblast2	Novel	0.00699522	OG0001113
AT4G22230	Atrichoblast2	Novel	0.00663101	OG0006544
AT5G56540	Atrichoblast2	Novel	0.00636158	OG0005714
AT4G22235	Atrichoblast2	Novel	0.00610312	OG0006544
AT2G43610	Atrichoblast2	Novel	0.00603439	OG0010773
AT2G42870	Atrichoblast2	Novel	0.00589263	OG0008144
AT3G08030	Atrichoblast2	Novel	0.00572966	OG0006291
AT5G40330	Atrichoblast2	Novel	0.00556672	OG0015004
AT1G74500	Atrichoblast2	Novel	0.0055343	OG0017791
AT4G25100	Atrichoblast2	Novel	0.00539904	OG0002725
AT4G25260	Atrichoblast2	Novel	0.00531622	OG0000480
AT5G19520	Atrichoblast2	Novel	0.00529332	OG0006759
AT3G19200	Atrichoblast2	Novel	0.0052469	OG0014897
AT1G13590	Atrichoblast2	Novel	0.00521687	OG0000716
AT5G35940	Atrichoblast2	Novel	0.00518458	OG0000083
AT2G47460	Atrichoblast2	Novel	0.00516465	OG0018104
AT1G54690	Atrichoblast2	Novel	0.00506734	OG0002315
AT2G44740	Atrichoblast2	Novel	0.00472579	OG0005947
AT4G31800	Atrichoblast2	Novel	0.00453959	OG0000706
AT3G28910	Atrichoblast2	Novel	0.00450117	OG0000160
AT3G05020	Atrichoblast2	Novel	0.00449731	OG0000413
AT2G34600	Atrichoblast2	Novel	0.00447633	OG0001383
AT5G02580	Atrichoblast2	Novel	0.00447534	OG0000596
AT2G17280	Atrichoblast2	Novel	0.00447246	OG0006022
AT5G59690	Atrichoblast2	Novel	0.00441848	OG0000056
AT5G13500	Atrichoblast2	Novel	0.00439437	OG0003746
AT1G77330	Atrichoblast2	Novel	0.004394	OG0002210
AT3G15370	Atrichoblast2	Novel	0.00438084	OG0018348
AT3G55750	Atrichoblast2	Novel	0.00436975	OG0001017
AT5G20230	Atrichoblast2	Novel	0.00434115	OG0013076
AT3G49580	Atrichoblast2	Novel	0.00433499	OG0000765
AT5G06860	Atrichoblast2	Novel	0.00433424	OG0001168
AT5G14360	Atrichoblast2	Novel	0.00432989	OG0006955
AT5G42380	Atrichoblast2	Novel	0.00430155	OG0000871
AT2G22121	Atrichoblast2	Novel	0.00428291	OG0002578
AT5G59970	Atrichoblast2	Novel	0.00427786	OG0000056
AT1G70790	Atrichoblast2	Novel	0.00427286	OG0017683
AT2G37640	Atrichoblast2	Novel	0.00425714	OG0001441
AT3G53650	Atrichoblast2	Novel	0.00423607	OG0000133
AT5G15150	Atrichoblast2	Novel	0.00419876	OG0012165
AT3G51660	Atrichoblast2	Novel	0.00419327	OG0018266
AT3G15950	Atrichoblast2	Novel	0.00417558	OG0014709
AT5G14750	Atrichoblast2	Novel	0.0041685	OG0015004
AT5G66170	Atrichoblast2	Novel	0.00416768	OG0003239
AT5G15960	Atrichoblast2	Novel	0.00416037	OG0018712
AT4G30290	Atrichoblast2	Novel	0.00411487	OG0010871
AT2G32210	Atrichoblast2	Novel	0.00411017	OG0001354
AT2G47140	Atrichoblast2	Novel	0.00407599	OG0001440
AT3G47380	Atrichoblast2	Novel	0.00405514	OG0000480
AT4G31290	Atrichoblast2	Novel	0.00404915	OG0006546
AT1G66280	Atrichoblast2	Novel	0.00403051	OG0001305
AT1G54630	Atrichoblast2	Novel	0.00401795	OG0000413
AT1G01100	Atrichoblast2	Novel	0.00401062	OG0014637
AT1G64640	Atrichoblast2	Novel	0.00400608	OG0010900
AT1G12950	Atrichoblast2	Novel	0.00398913	OG0000686
AT1G41830	Atrichoblast2	Novel	0.0039848	OG0000361
AT3G06778	Atrichoblast2	Novel	0.00397871	OG0012212
AT5G19340	Atrichoblast2	Novel	0.00395691	OG0011885
AT3G23470	Atrichoblast2	Novel	0.00394683	OG0008919
AT3G43720	Atrichoblast2	Novel	0.00393949	OG0003365
AT2G29670	Atrichoblast2	Novel	0.00391818	OG0001027
AT1G26945	Atrichoblast2	Novel	0.00391365	OG0001701
AT1G48330	Atrichoblast2	Novel	0.0038877	OG0004331
AT5G22140	Atrichoblast2	Novel	0.00387547	OG0002637
AT3G12110	Atrichoblast2	Novel	0.00387386	OG0000071
AT4G38400	Atrichoblast2	Novel	0.00387322	OG0000265
AT3G04320	Atrichoblast2	Novel	0.00386654	OG0018275
AT5G56550	Atrichoblast2	Novel	0.00386143	OG0003681
AT1G04040	Atrichoblast2	Novel	0.00384612	OG0014670
AT1G25450	Atrichoblast2	Novel	0.00384593	OG0007855
AT2G01250	Atrichoblast2	Novel	0.00376198	OG0000924
AT1G20823	Atrichoblast2	Novel	0.00376037	OG0000409
AT4G26320	Atrichoblast2	Novel	0.00375329	OG0005714
AT3G54810	Atrichoblast2	Novel	0.00375211	OG0014926
AT5G12940	Atrichoblast2	Novel	0.00374442	OG0004717
AT5G10400	Atrichoblast2	Novel	0.00372708	OG0000062
AT1G17285	Atrichoblast2	Novel	0.00366422	OG0014482
AT1G30070	Atrichoblast2	Novel	0.00365554	OG0008067
AT3G16430	Atrichoblast2	Novel	0.00364682	OG0000083
AT2G28740	Atrichoblast2	Novel	0.00363993	OG0000056
AT1G20010	Atrichoblast2	Novel	0.00362586	OG0000101
AT5G59910	Atrichoblast2	Novel	0.00361341	OG0000133
AT1G66800	Atrichoblast2	Novel	0.0035822	OG0007459
AT5G48900	Atrichoblast2	Novel	0.00357967	OG0000589
AT3G55360	Atrichoblast2	Novel	0.00355898	OG0008828
AT4G03190	Atrichoblast2	Novel	0.00355878	OG0006228
AT3G16050	Atrichoblast2	Novel	0.00355441	OG0018258
AT3G03280	Atrichoblast2	Novel	0.00355083	OG0001928
AT1G69680	Atrichoblast2	Novel	0.00354867	OG0014570
AT4G39840	Atrichoblast2	Novel	0.00354454	OG0000300
AT1G47640	Atrichoblast2	Novel	0.00353636	OG0014612
AT1G02400	Atrichoblast2	Novel	0.00349884	OG0002979
AT1G11545	Atrichoblast2	Novel	0.00349613	OG0005503
AT5G07860	Atrichoblast2	Novel	0.00349066	OG0002769
AT3G22275	Atrichoblast2	Novel	0.00348999	OG0001383
AT2G35610	Atrichoblast2	Novel	0.00348318	OG0011557
AT1G23060	Atrichoblast2	Novel	0.00347388	OG0014462
AT5G14020	Atrichoblast2	Novel	0.00344819	OG0012648
AT3G20370	Atrichoblast2	Novel	0.00342364	OG0000112
AT4G22010	Atrichoblast2	Novel	0.00340602	OG0000361
AT1G30110	Atrichoblast2	Novel	0.00340423	OG0017897
AT2G29020	Atrichoblast2	Novel	0.00337641	OG0008137
AT3G52770	Atrichoblast2	Novel	0.00336846	OG0003561
AT1G45015	Atrichoblast2	Novel	0.00334333	OG0004134
AT3G46030	Atrichoblast2	Novel	0.00333673	OG0000133
AT3G53020	Atrichoblast2	Novel	0.00333446	OG0003358
AT4G15000	Atrichoblast2	Novel	0.00329384	OG0001982
AT4G26230	Atrichoblast2	Novel	0.00328465	OG0003373
AT1G16030	Atrichoblast2	Novel	0.00328177	OG0000132
AT4G32870	Atrichoblast2	Novel	0.00327978	OG0001469
AT1G76240	Atrichoblast2	Novel	0.00327176	OG0001333
AT5G44585	Atrichoblast2	Novel	0.00326181	OG0006800
AT5G66590	Atrichoblast2	Novel	0.00325301	OG0015154
AT3G44326	Atrichoblast2	Novel	0.00323371	OG0000616
AT1G16740	Atrichoblast2	Novel	0.00323332	OG0005669
AT3G53730	Atrichoblast2	Novel	0.00322987	OG0000056
AT1G54000	Atrichoblast2	Novel	0.00322197	OG0005544
AT5G42860	Atrichoblast2	Novel	0.00322069	OG0004347
AT3G23730	Atrichoblast2	Novel	0.0032206	OG0014989
AT5G04800	Atrichoblast2	Novel	0.00321968	OG0001913
AT2G41810	Atrichoblast2	Novel	0.00320551	OG0011432
AT2G25900	Atrichoblast2	Novel	0.0032036	OG0000512
AT3G45030	Atrichoblast2	Novel	0.00320155	OG0003432
AT1G13950	Atrichoblast2	Novel	0.00319933	OG0000710
AT5G57090	Atrichoblast2	Novel	0.00319044	OG0012905
AT1G75780	Atrichoblast2	Novel	0.00317525	OG0000101
AT1G56045	Atrichoblast2	Novel	0.00316342	OG0005539
AT4G32000	Atrichoblast2	Novel	0.00315427	OG0003409
AT2G18980	Atrichoblast2	Novel	0.00315335	OG0000509
AT3G12580	Atrichoblast2	Novel	0.0031147	OG0000132
AT1G80830	Atrichoblast2	Novel	0.00310934	OG0007412
AT2G23690	Atrichoblast2	Novel	0.00310389	OG0000425
AT4G29270	Atrichoblast2	Novel	0.00307561	OG0004911
AT2G26240	Atrichoblast2	Novel	0.00306759	OG0008077
AT3G54560	Atrichoblast2	Novel	0.00306421	OG0001380
AT3G12120	Atrichoblast2	Novel	0.0030625	OG0000931
AT3G56070	Atrichoblast2	Novel	0.00305601	OG0018424
AT3G01220	Atrichoblast2	Novel	0.00304943	OG0012165
AT1G73965	Atrichoblast2	Novel	0.00303713	OG0004017
AT3G50640	Atrichoblast2	Novel	0.00303184	OG0001164
AT5G03850	Atrichoblast2	Novel	0.00302811	OG0004675
AT3G16080	Atrichoblast2	Novel	0.00302708	OG0001806
AT5G08180	Atrichoblast2	Novel	0.00302571	OG0009408
AT4G15765	Atrichoblast2	Novel	0.00302528	OG0003673
AT5G41520	Atrichoblast2	Novel	0.00301618	OG0001208
AT5G65890	Atrichoblast2	Novel	0.00301069	OG0018611
AT1G19350	Atrichoblast2	Novel	0.003008	OG0010556
AT2G20880	Atrichoblast2	Novel	0.00299579	OG0002472
AT3G45980	Atrichoblast2	Novel	0.00299578	OG0000133
AT1G44830	Atrichoblast2	Novel	0.00299363	OG0002244
AT1G20580	Atrichoblast2	Novel	0.00299244	OG0001426
AT5G11640	Atrichoblast2	Novel	0.00298276	OG0012811
AT1G21910	Atrichoblast2	Novel	0.0029817	OG0002244
AT3G60770	Atrichoblast2	Novel	0.00298068	OG0001954
AT3G55280	Atrichoblast2	Novel	0.0029781	OG0001863
AT5G27670	Atrichoblast2	Novel	0.00297084	OG0000525
AT5G59030	Atrichoblast2	Novel	0.00296558	OG0000898
AT5G59870	Atrichoblast2	Novel	0.00295235	OG0000525
AT4G22300	Atrichoblast2	Novel	0.00295018	OG0001838
AT5G47370	Atrichoblast2	Novel	0.00294829	OG0000384
AT1G67330	Atrichoblast2	Novel	0.00293739	OG0004116
AT2G45310	Atrichoblast2	Novel	0.00293529	OG0003092
AT1G20950	Atrichoblast2	Novel	0.00293443	OG0004089
AT2G01340	Atrichoblast2	Novel	0.00291086	OG0000474
AT4G36880	Atrichoblast2	Novel	0.00290973	OG0012416
AT5G65640	Atrichoblast2	Novel	0.00290281	OG0001221
AT4G25630	Atrichoblast2	Novel	0.00289917	OG0003640
AT2G29550	Atrichoblast2	Novel	0.00289677	OG0000101
AT3G49720	Atrichoblast2	Novel	0.00289324	OG0002590
AT5G20110	Atrichoblast2	Novel	0.00287821	OG0013209
AT2G04390	Atrichoblast2	Novel	0.00287489	OG0001913
AT1G78340	Atrichoblast2	Novel	0.0028682	OG0000158
AT2G26150	Atrichoblast2	Novel	0.00286575	OG0018088
AT2G07340	Atrichoblast2	Novel	0.00286541	OG0011687
AT1G07590	Atrichoblast2	Novel	0.00286475	OG0010616
AT4G17720	Atrichoblast2	Novel	0.0028333	OG0002736
AT3G58850	Atrichoblast2	Novel	0.00282294	OG0008144
AT3G15540	Atrichoblast2	Novel	0.00282195	OG0014590
AT5G58670	Atrichoblast2	Novel	0.00281914	OG0018543
AT4G02230	Atrichoblast2	Novel	0.00281056	OG0001717
AT4G25250	Atrichoblast2	Novel	0.00280418	OG0018527
AT3G27360	Atrichoblast2	Novel	0.00280074	OG0000062
AT1G09950	Atrichoblast2	Novel	0.00279165	OG0002284
AT3G62990	Atrichoblast2	Novel	0.00278442	OG0018122
AT3G59850	Atrichoblast2	Novel	0.00278315	OG0000278
AT1G07790	Atrichoblast2	Novel	0.00277514	OG0000133
AT1G07820	Atrichoblast2	Novel	0.00277507	OG0000056
AT2G43880	Atrichoblast2	Novel	0.00276906	OG0011463
AT4G13720	Atrichoblast2	Novel	0.00276485	OG0012372
AT1G45130	Atrichoblast2	Novel	0.00274873	OG0017822
AT3G06610	Atrichoblast2	Novel	0.00274802	OG0004710
AT3G56020	Atrichoblast2	Novel	0.00271554	OG0005539
AT3G57150	Atrichoblast2	Novel	0.0027145	OG0004709
AT1G68150	Atrichoblast2	Novel	0.00271243	OG0011122
AT4G01950	Atrichoblast2	Novel	0.0027115	OG0011020
AT1G21310	Cortex	Novel	0.0106222	OG0007530
AT3G44310	Cortex	Novel	0.00804645	OG0014935
AT1G12090	Cortex	Novel	0.00790526	OG0000499
AT2G45180	Cortex	Novel	0.00764674	OG0014804
AT4G30170	Cortex	Novel	0.00718737	OG0000509
AT5G42250	Cortex	Novel	0.00680934	OG0006893
AT3G51240	Cortex	Novel	0.0067068	OG0012080
AT2G43535	Cortex	Novel	0.0062572	OG0005835
AT5G13930	Cortex	Novel	0.00606727	OG0003697
AT3G48000	Cortex	Novel	0.00585837	OG0002279
AT1G06640	Cortex	Novel	0.00581337	OG0000037
AT1G19450	Cortex	Novel	0.0057512	OG0002949
AT2G06850	Cortex	Novel	0.00550007	OG0008132
AT5G65380	Cortex	Novel	0.00549829	OG0005034
AT5G26260	Cortex	Novel	0.00539053	OG0000112
AT2G06255	Cortex	Novel	0.00535433	OG0004230
AT2G02990	Cortex	Novel	0.00520379	OG0004104
AT3G03341	Cortex	Novel	0.0049162	OG0012213
AT2G21045	Cortex	Novel	0.0048742	OG0003239
AT5G25460	Cortex	Novel	0.00484899	OG0001729
AT3G18830	Cortex	Novel	0.00464849	OG0006369
AT5G64620	Cortex	Novel	0.00459696	OG0002810
AT1G76090	Cortex	Novel	0.00458132	OG0003987
AT1G03230	Cortex	Novel	0.0045604	OG0000834
AT5G08640	Cortex	Novel	0.00447582	OG0002056
AT3G11260	Cortex	Novel	0.00446073	OG0000123
AT1G27030	Cortex	Novel	0.00420818	OG0017745
AT5G48000	Cortex	Novel	0.00419076	OG0001678
AT1G76790	Cortex	Novel	0.00418473	OG0000810
AT3G55720	Cortex	Novel	0.00410694	OG0003485
AT1G29025	Cortex	Novel	0.00408244	OG0010562
AT4G30660	Cortex	Novel	0.00405464	OG0008233
AT1G80180	Cortex	Novel	0.00405392	OG0001718
AT1G05710	Cortex	Novel	0.00402126	OG0008019
AT2G25735	Cortex	Novel	0.0039411	OG0002532
AT1G76640	Cortex	Novel	0.00391789	OG0000871
AT1G76650	Cortex	Novel	0.0039175	OG0000871
AT2G46140	Cortex	Novel	0.0039096	OG0001076
AT3G12700	Cortex	Novel	0.00389124	OG0001943
AT1G05575	Cortex	Novel	0.00382535	OG0001042
AT1G58360	Cortex	Novel	0.00379044	OG0001804
AT5G27700	Cortex	Novel	0.00362724	OG0001158
AT3G25290	Cortex	Novel	0.00356781	OG0000774
AT5G42590	Cortex	Novel	0.00356229	OG0000084
AT3G26590	Cortex	Novel	0.00352247	OG0000686
AT5G22580	Cortex	Novel	0.00351133	OG0009406
AT5G47990	Cortex	Novel	0.0034998	OG0000176
AT1G07985	Cortex	Novel	0.00345035	OG0007788
AT3G54400	Cortex	Novel	0.00344446	OG0008751
AT2G48020	Cortex	Novel	0.00336517	OG0004392
AT5G53370	Cortex	Novel	0.00336456	OG0006307
AT4G04830	Cortex	Novel	0.00328808	OG0006698
AT3G20940	Cortex	Novel	0.00327807	OG0000176
AT1G75600	Cortex	Novel	0.00320016	OG0000062
AT3G46660	Cortex	Novel	0.00319577	OG0000754
AT1G77920	Cortex	Novel	0.00317215	OG0001058
AT5G59540	Cortex	Novel	0.00317167	OG0000037
AT2G25810	Cortex	Novel	0.0031611	OG0011518
AT2G47400	Cortex	Novel	0.00313827	OG0004452
AT3G56490	Cortex	Novel	0.00311902	OG0002313
AT4G21440	Cortex	Novel	0.00311117	OG0012248
AT1G09090	Cortex	Novel	0.00309077	OG0005452
AT1G78570	Cortex	Novel	0.00308963	OG0003029
AT4G18170	Cortex	Novel	0.00307866	OG0018495
AT4G00710	Cortex	Novel	0.00305321	OG0000366
AT2G38300	Cortex	Novel	0.00303797	OG0000823
AT4G02520	Cortex	Novel	0.00302274	OG0001351
AT3G24420	Cortex	Novel	0.00299857	OG0012143
AT4G12520	Cortex	Novel	0.00292038	OG0000499
AT1G62510	Cortex	Novel	0.00291893	OG0000499
AT3G15760	Cortex	Novel	0.00291885	OG0001392
AT5G47240	Cortex	Novel	0.00291732	OG0009440
AT4G36950	Cortex	Novel	0.00291223	OG0014980
AT2G24290	Cortex	Novel	0.00290164	OG0008339
AT5G65360	Cortex	Novel	0.00287955	OG0000062
AT2G40880	Cortex	Novel	0.00286975	OG0001438
AT2G06925	Cortex	Novel	0.00285689	OG0008136
AT5G02270	Cortex	Novel	0.00284312	OG0013293
AT1G70370	Cortex	Novel	0.00282707	OG0000824
AT1G55360	Cortex	Novel	0.00282086	OG0001075
AT3G02230	Cortex	Novel	0.00280863	OG0000626
AT1G26960	Cortex	Novel	0.00279551	OG0002258
AT5G56010	Cortex	Novel	0.00278298	OG0000643
AT5G63600	Cortex	Novel	0.00277608	OG0002056
AT1G66760	Cortex	Novel	0.00277524	OG0014583
AT3G25760	Cortex	Novel	0.00274192	OG0002232
AT1G72210	Cortex	Novel	0.00273569	OG0004220
AT3G47220	Cortex	Novel	0.00272584	OG0018342
AT1G52300	Cortex	Novel	0.00272562	OG0001806
AT4G28840	Cortex	Novel	0.00271932	OG0002506
AT1G70310	Cortex	Novel	0.0026814	OG0007820
AT4G24110	Cortex	Novel	0.00267862	OG0018573
AT5G35630	Cortex	Novel	0.00267583	OG0009519
AT1G72900	Cortex	Novel	0.00266089	OG0000693
AT5G66580	Cortex	Novel	0.00264481	OG0000425
AT3G12610	Cortex	Novel	0.00263633	OG0004717
AT1G47480	Cortex	Novel	0.00263355	OG0000811
AT1G17300	Cortex	Novel	0.00261938	OG0014482
AT2G26190	Cortex	Novel	0.00260908	OG0001857
AT2G31750	Cortex	Novel	0.00260823	OG0011208
AT5G05270	Cortex	Novel	0.00260677	OG0009752
AT3G53740	Cortex	Novel	0.00259927	OG0002462
AT2G03760	Cortex	Novel	0.00259859	OG0000049
AT1G12240	Cortex	Novel	0.00258844	OG0003010
AT1G03870	Cortex	Novel	0.00256756	OG0002400
AT1G02850	Cortex	Novel	0.00256545	OG0001101
AT5G41810	Cortex	Novel	0.00255132	OG0007799
AT5G59580	Cortex	Novel	0.0025325	OG0000754
AT1G52565	Cortex	Novel	0.00253002	OG0001392
AT3G44300	Cortex	Novel	0.00251581	OG0014935
AT3G22540	Cortex	Novel	0.00248556	OG0006353
AT1G80440	Cortex	Novel	0.00247869	OG0002220
AT5G11420	Cortex	Novel	0.00245766	OG0001729
AT3G57520	Cortex	Novel	0.00244488	OG0011969
AT3G07800	Cortex	Novel	0.00243164	OG0008707
AT1G48630	Cortex	Novel	0.00242761	OG0001423
AT1G14980	Cortex	Novel	0.00241867	OG0002207
AT4G18360	Cortex	Novel	0.00241481	OG0000767
AT2G03350	Cortex	Novel	0.00239571	OG0005913
AT1G51060	Cortex	Novel	0.00238128	OG0001293
AT2G36160	Cortex	Novel	0.00237766	OG0002565
AT1G74100	Cortex	Novel	0.00234936	OG0002346
AT3G27230	Cortex	Novel	0.00234781	OG0001188
AT5G41790	Cortex	Novel	0.0023473	OG0014598
AT3G55290	Cortex	Novel	0.00233969	OG0001712
AT2G44860	Cortex	Novel	0.00233069	OG0008167
AT3G11210	Cortex	Novel	0.00232512	OG0008704
AT2G45050	Cortex	Novel	0.00232126	OG0004489
AT3G18740	Cortex	Novel	0.00229633	OG0001745
AT1G72450	Cortex	Novel	0.00229139	OG0017686
AT1G02930	Cortex	Novel	0.00227724	OG0001351
AT3G02080	Cortex	Novel	0.00227589	OG0002679
AT3G23550	Cortex	Novel	0.00227362	OG0001189
AT2G44840	Cortex	Novel	0.00226898	OG0001854
AT5G10990	Cortex	Novel	0.00226088	OG0001780
AT1G51680	Cortex	Novel	0.00225928	OG0000708
AT1G64650	Cortex	Novel	0.0022438	OG0002331
AT2G02780	Cortex	Novel	0.00223968	OG0007818
AT1G73010	Cortex	Novel	0.00223838	OG0000861
AT2G47930	Cortex	Novel	0.00221712	OG0004485
AT1G59960	Cortex	Novel	0.00221642	OG0000485
AT1G15580	Cortex	Novel	0.00221177	OG0000837
AT2G17360	Cortex	Novel	0.0022114	OG0002485
AT1G33110	Cortex	Novel	0.00219673	OG0000588
AT4G32460	Cortex	Novel	0.00218803	OG0001729
AT2G26690	Cortex	Novel	0.00217124	OG0008185
AT2G17080	Cortex	Novel	0.00215269	OG0003281
AT1G60960	Cortex	Novel	0.0021506	OG0005479
AT1G09750	Cortex	Novel	0.00214557	OG0007421
AT5G10770	Cortex	Novel	0.00214052	OG0005010
AT1G50430	Cortex	Novel	0.00213646	OG0007959
AT1G60470	Cortex	Novel	0.00213449	OG0017976
AT5G55050	Cortex	Novel	0.00212939	OG0005051
AT3G59360	Cortex	Novel	0.00211827	OG0005917
AT5G37540	Cortex	Novel	0.00211597	OG0010743
AT5G62280	Cortex	Novel	0.00209912	OG0009587
AT4G37430	Cortex	Novel	0.00205048	OG0000135
AT3G55120	Cortex	Novel	0.00204597	OG0003438
AT1G79040	Cortex	Novel	0.00204402	OG0007967
AT5G24410	Cortex	Novel	0.00203615	OG0014898
AT5G41685	Cortex	Novel	0.0020231	OG0004210
AT3G21240	Cortex	Novel	0.00202229	OG0000708
AT3G13610	Cortex	Novel	0.00201304	OG0007858
AT1G22780	Cortex	Novel	0.002011	OG0001342
AT5G25110	Cortex	Novel	0.00200597	OG0002090
AT3G01740	Cortex	Novel	0.0020014	OG0008540
AT5G38550	Cortex	Novel	0.00199391	OG0000083
AT1G02860	Cortex	Novel	0.0019794	OG0014542
AT3G22300	Cortex	Novel	0.00197462	OG0008820
AT5G66040	Cortex	Novel	0.00197421	OG0009077
AT3G52480	Cortex	Novel	0.00197305	OG0018312
AT3G51860	Cortex	Novel	0.00197178	OG0003400
AT4G26760	Cortex	Novel	0.00196542	OG0001573
AT5G24660	Cortex	Novel	0.00193448	OG0000765
AT1G12610	Cortex	Novel	0.00193071	OG0000812
AT3G51000	Cortex	Novel	0.0019193	OG0008872
AT2G17710	Cortex	Novel	0.00191711	OG0011517
AT5G67210	Cortex	Novel	0.00191629	OG0000629
AT1G49410	Cortex	Novel	0.00190064	OG0010635
AT4G26220	Cortex	Novel	0.00189722	OG0015066
AT3G57930	Cortex	Novel	0.00189116	OG0000600
AT1G70280	Cortex	Novel	0.001885	OG0001049
AT5G23870	Cortex	Novel	0.00186792	OG0013240
AT1G73490	Cortex	Novel	0.00186259	OG0001800
AT2G34020	Cortex	Novel	0.00186087	OG0010562
AT4G37910	Cortex	Novel	0.00183492	OG0002047
AT5G19750	Cortex	Novel	0.00179948	OG0009478
AT2G22500	Cortex	Novel	0.00179807	OG0004567
AT4G30270	Cortex	Novel	0.00179728	OG0001214
AT1G04490	Cortex	Novel	0.00179018	OG0005462
AT4G31380	Cortex	Novel	0.00177708	OG0001201
AT5G01220	Cortex	Novel	0.00177368	OG0002075
AT3G56220	Cortex	Novel	0.00176937	OG0003259
AT5G56940	Cortex	Novel	0.00175893	OG0009608
AT5G44920	Cortex	Novel	0.00175317	OG0000172
AT4G01750	Cortex	Novel	0.00174947	OG0003018
AT5G03150	Cortex	Novel	0.00174315	OG0009512
AT5G57700	Cortex	Novel	0.00173972	OG0009857
AT5G28540	Cortex	Novel	0.00173686	OG0003748
AT3G54960	Cortex	Novel	0.00168673	OG0003482
AT2G36100	Endodermis	Novel	0.0170071	OG0006036
AT2G28670	Endodermis	Novel	0.0136551	OG0003143
AT3G55230	Endodermis	Novel	0.012796	OG0005923
AT5G66390	Endodermis	Novel	0.0127214	OG0015206
AT5G42180	Endodermis	Novel	0.0110963	OG0001585
AT3G24020	Endodermis	Novel	0.0106578	OG0004727
AT3G11550	Endodermis	Novel	0.0106261	OG0006036
AT2G40113	Endodermis	Novel	0.0106206	OG0003312
AT4G13580	Endodermis	Novel	0.00955278	OG0004727
AT2G30210	Endodermis	Novel	0.00921136	OG0008354
AT5G65530	Endodermis	Novel	0.00902	OG0002788
AT3G22600	Endodermis	Novel	0.00867238	OG0000426
AT4G17215	Endodermis	Novel	0.0083995	OG0003312
AT3G22620	Endodermis	Novel	0.00802397	OG0001760
AT1G61590	Endodermis	Novel	0.00785999	OG0005634
AT1G18100	Endodermis	Novel	0.00716001	OG0004126
AT2G47630	Endodermis	Novel	0.00697011	OG0005959
AT1G71740	Endodermis	Novel	0.00690716	OG0014700
AT3G32980	Endodermis	Novel	0.00653999	OG0004523
AT5G66400	Endodermis	Novel	0.00633496	OG0002678
AT5G39580	Endodermis	Novel	0.00626877	OG0015166
AT4G02090	Endodermis	Novel	0.00619949	OG0009307
AT4G08770	Endodermis	Novel	0.00590236	OG0004523
AT2G39430	Endodermis	Novel	0.00588322	OG0005923
AT2G34310	Endodermis	Novel	0.0057709	OG0014503
AT4G19880	Endodermis	Novel	0.00552414	OG0000301
AT5G15290	Endodermis	Novel	0.0055138	OG0005119
AT1G03920	Endodermis	Novel	0.00505798	OG0001092
AT2G33830	Endodermis	Novel	0.00503301	OG0003237
AT1G02900	Endodermis	Novel	0.00492735	OG0002297
AT2G28305	Endodermis	Novel	0.00484258	OG0000428
AT2G27370	Endodermis	Novel	0.00482055	OG0006036
AT3G21710	Endodermis	Novel	0.00476883	OG0004832
AT1G65690	Endodermis	Novel	0.00454435	OG0000819
AT3G14280	Endodermis	Novel	0.00451883	OG0001938
AT2G38800	Endodermis	Novel	0.00439667	OG0001133
AT5G42500	Endodermis	Novel	0.00438506	OG0007464
AT5G42030	Endodermis	Novel	0.00416306	OG0003428
AT1G49580	Endodermis	Novel	0.00414485	OG0001313
AT3G22240	Endodermis	Novel	0.00412711	OG0001354
AT1G44970	Endodermis	Novel	0.00399926	OG0007683
AT1G77120	Endodermis	Novel	0.00399585	OG0005558
AT2G37470	Endodermis	Novel	0.00390855	OG0000133
AT4G14010	Endodermis	Novel	0.00390801	OG0018521
AT4G22610	Endodermis	Novel	0.00370682	OG0012256
AT1G68500	Endodermis	Novel	0.00368325	OG0014678
AT5G23920	Endodermis	Novel	0.0036737	OG0006825
AT3G09270	Endodermis	Novel	0.00349387	OG0000115
AT5G36160	Endodermis	Novel	0.00346757	OG0004985
AT3G17390	Endodermis	Novel	0.00334682	OG0000723
AT1G06760	Endodermis	Novel	0.00334424	OG0017948
AT2G42430	Endodermis	Novel	0.00324165	OG0011343
AT4G33666	Endodermis	Novel	0.00323212	OG0018074
AT2G46930	Endodermis	Novel	0.00322417	OG0008130
AT4G02830	Endodermis	Novel	0.00322084	OG0001555
AT1G60680	Endodermis	Novel	0.00320439	OG0001008
AT4G10500	Endodermis	Novel	0.00320384	OG0012531
AT5G63590	Endodermis	Novel	0.00320377	OG0002056
AT1G13245	Endodermis	Novel	0.00319714	OG0000477
AT4G00430	Endodermis	Novel	0.00318726	OG0000416
AT2G46680	Endodermis	Novel	0.00314865	OG0003387
AT1G16510	Endodermis	Novel	0.00310415	OG0001714
AT3G55390	Endodermis	Novel	0.00308351	OG0012085
AT3G45970	Endodermis	Novel	0.00304675	OG0000265
AT3G61060	Endodermis	Novel	0.00302231	OG0004625
AT5G28646	Endodermis	Novel	0.002988	OG0001155
AT1G60010	Endodermis	Novel	0.00295765	OG0000407
AT1G56580	Endodermis	Novel	0.0029353	OG0002993
AT3G59540	Endodermis	Novel	0.00289478	OG0006060
AT5G47210	Endodermis	Novel	0.00288402	OG0018542
AT3G52790	Endodermis	Novel	0.00288145	OG0018437
AT5G10430	Endodermis	Novel	0.00286145	OG0011617
AT4G29930	Endodermis	Novel	0.00285444	OG0004960
AT4G15330	Endodermis	Novel	0.00278168	OG0000176
AT5G06200	Endodermis	Novel	0.00276389	OG0006036
AT1G62990	Endodermis	Novel	0.00275117	OG0004303
AT1G23120	Endodermis	Novel	0.00269749	OG0000678
AT4G20140	Endodermis	Novel	0.00268956	OG0006646
AT5G58650	Endodermis	Novel	0.00263657	OG0011268
AT3G53260	Endodermis	Novel	0.00263399	OG0000756
AT3G62100	Endodermis	Novel	0.00263267	OG0018093
AT4G33150	Endodermis	Novel	0.00263248	OG0009251
AT4G27280	Endodermis	Novel	0.00260423	OG0000430
AT2G22620	Endodermis	Novel	0.00243883	OG0000410
AT3G61890	Endodermis	Novel	0.00243381	OG0003387
AT3G23250	Endodermis	Novel	0.00242929	OG0001983
AT5G42655	Endodermis	Novel	0.00239501	OG0015247
AT4G24130	Endodermis	Novel	0.00234874	OG0000116
AT3G49910	Endodermis	Novel	0.00234567	OG0002631
AT5G09440	Endodermis	Novel	0.0023435	OG0005115
AT4G36430	Endodermis	Novel	0.00233835	OG0014749
AT5G64850	Endodermis	Novel	0.0023327	OG0001590
AT4G14940	Endodermis	Novel	0.00232869	OG0012270
AT5G16770	Endodermis	Novel	0.00230733	OG0000874
AT4G27657	Endodermis	Novel	0.00229119	OG0012480
AT1G08320	Endodermis	Novel	0.00223113	OG0014576
AT2G28650	Endodermis	Novel	0.00222173	OG0014604
AT1G03700	Endodermis	Novel	0.00219297	OG0005802
AT1G62975	Endodermis	Novel	0.00218754	OG0002407
AT1G12920	Endodermis	Novel	0.00217519	OG0000559
AT1G67080	Endodermis	Novel	0.00213748	OG0004337
AT5G10520	Endodermis	Novel	0.00212321	OG0002788
AT4G21340	Endodermis	Novel	0.00203724	OG0018463
AT4G26140	Endodermis	Novel	0.00202014	OG0006472
AT5G51680	Endodermis	Novel	0.00201531	OG0015208
AT1G74080	Endodermis	Novel	0.00199398	OG0017857
AT5G23810	Endodermis	Novel	0.0019867	OG0006977
AT5G10280	Endodermis	Novel	0.00196053	OG0000874
AT2G15300	Endodermis	Novel	0.001956	OG0018127
AT5G22270	Endodermis	Novel	0.00185687	OG0009366
AT2G46000	Endodermis	Novel	0.00184978	OG0005974
AT1G13830	Endodermis	Novel	0.00184105	OG0007745
AT4G34920	Endodermis	Novel	0.00182419	OG0002735
AT4G30980	Endodermis	Novel	0.00177346	OG0004515
AT5G47530	Endodermis	Novel	0.00173687	OG0012264
AT3G32030	Endodermis	Novel	0.00170808	OG0000204
AT4G16720	Endodermis	Novel	0.00170232	OG0001567
AT3G59880	Endodermis	Novel	0.00170018	OG0014823
AT2G44480	Endodermis	Novel	0.00169551	OG0000261
AT1G15385	Endodermis	Novel	0.00165171	OG0000733
AT2G16980	Endodermis	Novel	0.00163066	OG0000741
AT4G35160	Endodermis	Novel	0.00159181	OG0000028
AT1G20380	Endodermis	Novel	0.00158589	OG0005418
AT2G32510	Endodermis	Novel	0.00158435	OG0000717
AT4G33420	Endodermis	Novel	0.00157	OG0012584
AT4G17483	Endodermis	Novel	0.00151705	OG0006640
AT3G45080	Endodermis	Novel	0.00151149	OG0000049
AT1G43020	Endodermis	Novel	0.00150138	OG0002967
AT5G67340	Endodermis	Novel	0.00149659	OG0004477
AT2G28210	Endodermis	Novel	0.00147127	OG0000719
AT3G05937	Endodermis	Novel	0.00132041	OG0018326
AT3G06790	Endodermis	Novel	0.00130023	OG0012038
AT2G18150	Endodermis	Novel	0.00129015	OG0014749
AT3G59480	Endodermis	Novel	0.00127048	OG0002401
AT2G48130	Endodermis	Novel	0.00120692	OG0000426
AT3G15990	Endodermis	Novel	0.00119271	OG0011842
AT2G41540	Endodermis	Novel	0.00119123	OG0001849
AT5G41970	Endodermis	Novel	0.00116384	OG0012966
AT5G60990	Endodermis	Novel	0.00114685	OG0006965
AT5G52790	Endodermis	Novel	0.00110795	OG0000713
AT4G25480	Endodermis	Novel	0.00105808	OG0000812
AT2G42760	Endodermis	Novel	0.00104011	OG0001447
AT1G10360	Endodermis	Novel	0.00102637	OG0001082
AT4G38620	Endodermis	Novel	0.0010252	OG0004898
AT4G13100	Endodermis	Novel	0.00100843	OG0014902
AT3G48350	Endodermis	Novel	0.000990152	OG0000926
AT1G80820	Endodermis	Novel	0.000976001	OG0001294
AT1G13600	Endodermis	Novel	0.000965422	OG0017865
AT5G66490	Endodermis	Novel	0.000945335	OG0008168
AT4G19920	Endodermis	Novel	0.000916227	OG0000172
AT4G18650	Endodermis	Novel	0.000900823	OG0002284
AT3G55090	Endodermis	Novel	0.000885999	OG0001455
AT5G41040	Endodermis	Novel	0.000867103	OG0003728
AT1G58420	Endodermis	Novel	0.000833257	OG0000585
AT1G47760	Endodermis	Novel	0.000797556	OG0017894
AT5G02780	Endodermis	Novel	0.000784886	OG0001237
AT5G24655	Endodermis	Novel	0.000741183	OG0000765
AT2G16750	Endodermis	Novel	0.000699238	OG0006005
AT5G12420	Endodermis	Novel	0.000681662	OG0000481
AT2G21140	Endodermis	Novel	0.000655055	OG0000427
AT5G52670	Endodermis	Novel	0.000623166	OG0005002
AT4G35030	Endodermis	Novel	0.000620384	OG0006005
AT1G54540	Endodermis	Novel	0.000598932	OG0000819
AT3G29430	Endodermis	Novel	0.000586637	OG0000319
AT4G05170	Endodermis	Novel	0.000570431	OG0018463
AT3G29410	Endodermis	Novel	0.00053527	OG0000204
AT1G61070	Endodermis	Novel	0.000530856	OG0001030
AT3G45680	Endodermis	Novel	0.00052656	OG0000437
AT5G02890	Endodermis	Novel	0.000523404	OG0003766
AT4G20970	Endodermis	Novel	0.000522701	OG0002030
AT5G15510	Endodermis	Novel	0.000517987	OG0002608
AT3G56730	Endodermis	Novel	0.000514834	OG0001459
AT5G43540	Endodermis	Novel	0.000513904	OG0003473
AT1G26560	Endodermis	Novel	0.00050944	OG0003061
AT2G38390	Endodermis	Novel	0.000501154	OG0004523
AT2G21100	Endodermis	Novel	0.000484193	OG0018052
AT5G44574	Endodermis	Novel	0.000429869	OG0018771
AT5G61850	Endodermis	Novel	0.000393724	OG0009360
AT3G22550	Endodermis	Novel	0.000391904	OG0003504
AT3G52110	Endodermis	Novel	0.000383625	OG0012177
AT3G01420	Endodermis	Novel	0.000381973	OG0006396
AT1G66550	Endodermis	Novel	0.000367363	OG0005703
AT1G64405	Endodermis	Novel	0.000362344	OG0004222
AT4G39720	Endodermis	Novel	0.000347139	OG0000772
AT1G04220	Endodermis	Novel	0.000336728	OG0017980
AT5G04347	Endodermis	Novel	0.000329081	OG0000256
AT1G75830	Endodermis	Novel	0.000323102	OG0004195
AT4G08780	Endodermis	Novel	0.000309052	OG0004523
AT3G06390	Endodermis	Novel	0.00030624	OG0006439
AT2G47810	Endodermis	Novel	0.000272006	OG0004500
AT4G05180	Endodermis	Novel	0.000261566	OG0004858
AT1G14550	Endodermis	Novel	0.000246405	OG0007467
AT4G37310	Endodermis	Novel	0.000223624	OG0000135
AT1G11362	Endodermis	Novel	0.000221937	OG0003992
AT5G59810	Endodermis	Novel	0.000218027	OG0001894
AT4G22860	Endodermis	Novel	0.000206233	OG0008997
AT3G02940	Endodermis	Novel	0.000203157	OG0000874
AT3G48740	Endodermis	Novel	0.000195852	OG0011786
AT2G27300	Endodermis	Novel	0.000190553	OG0014853
AT1G78470	Endodermis	Novel	0.000175123	OG0005561
AT1G05260	Meristem_Endocortex	Novel	0.010563	OG0000492
AT4G11290	Meristem_Endocortex	Novel	0.00831296	OG0000492
AT2G14900	Meristem_Endocortex	Novel	0.0073352	OG0001100
AT1G69930	Meristem_Endocortex	Novel	0.00616035	OG0010699
AT3G11660	Meristem_Endocortex	Novel	0.00580037	OG0004539
AT2G30860	Meristem_Endocortex	Novel	0.00513665	OG0018126
AT4G11190	Meristem_Endocortex	Novel	0.00507837	OG0001069
AT3G17820	Meristem_Endocortex	Novel	0.0050321	OG0000500
AT3G09390	Meristem_Endocortex	Novel	0.00472796	OG0004805
AT2G34070	Meristem_Endocortex	Novel	0.00456791	OG0001348
AT1G13420	Meristem_Endocortex	Novel	0.0045398	OG0000049
AT4G05100	Meristem_Endocortex	Novel	0.00451287	OG0012248
AT5G28020	Meristem_Endocortex	Novel	0.00428875	OG0014968
AT5G57620	Meristem_Endocortex	Novel	0.00416774	OG0001501
AT3G45070	Meristem_Endocortex	Novel	0.00407116	OG0000049
AT1G72940	Meristem_Endocortex	Novel	0.00388787	OG0000693
AT1G11210	Meristem_Endocortex	Novel	0.00383871	OG0007637
AT2G16700	Meristem_Endocortex	Novel	0.00367893	OG0008305
AT5G20820	Meristem_Endocortex	Novel	0.0036554	OG0001233
AT4G01410	Meristem_Endocortex	Novel	0.00358831	OG0015081
AT5G59590	Meristem_Endocortex	Novel	0.00347555	OG0000754
AT1G69490	Meristem_Endocortex	Novel	0.00319769	OG0007731
AT3G10525	Meristem_Endocortex	Novel	0.00316252	OG0018436
AT3G04520	Meristem_Endocortex	Novel	0.00315681	OG0003117
AT2G28510	Meristem_Endocortex	Novel	0.00297142	OG0000571
AT2G29980	Meristem_Endocortex	Novel	0.00287339	OG0004547
AT5G07010	Meristem_Endocortex	Novel	0.00282702	OG0000049
AT1G15010	Meristem_Endocortex	Novel	0.00278594	OG0003207
AT5G49800	Meristem_Endocortex	Novel	0.00272267	OG0012909
AT1G03790	Meristem_Endocortex	Novel	0.00272267	OG0014671
AT3G15356	Meristem_Endocortex	Novel	0.00259895	OG0005469
AT3G04530	Meristem_Endocortex	Novel	0.00254018	OG0002339
AT1G35260	Meristem_Endocortex	Novel	0.00247203	OG0000813
AT5G65790	Meristem_Endocortex	Novel	0.00241485	OG0001501
AT1G65890	Meristem_Endocortex	Novel	0.00235185	OG0001296
AT1G14580	Meristem_Endocortex	Novel	0.00233739	OG0000476
AT3G11510	Meristem_Endocortex	Novel	0.00232903	OG0002565
AT4G02930	Meristem_Endocortex	Novel	0.00232791	OG0009292
AT4G29700	Meristem_Endocortex	Novel	0.00231515	OG0015116
AT3G47210	Meristem_Endocortex	Novel	0.00230522	OG0003447
AT1G57660	Meristem_Endocortex	Novel	0.00227223	OG0001290
AT1G08880	Meristem_Endocortex	Novel	0.00226819	OG0002315
AT3G50800	Meristem_Endocortex	Novel	0.002243	OG0000425
AT4G22110	Meristem_Endocortex	Novel	0.00223299	OG0007691
AT3G21690	Meristem_Endocortex	Novel	0.00220482	OG0001184
AT5G61130	Meristem_Endocortex	Novel	0.00217496	OG0001068
AT2G36930	Meristem_Endocortex	Novel	0.00216318	OG0008410
AT4G16447	Meristem_Endocortex	Novel	0.00214961	OG0018462
AT1G01300	Meristem_Endocortex	Novel	0.0021194	OG0002391
AT2G31230	Meristem_Endocortex	Novel	0.00208521	OG0017967
AT2G03120	Meristem_Endocortex	Novel	0.00206482	OG0008402
AT1G22490	Meristem_Endocortex	Novel	0.00206437	OG0004220
AT3G49360	Meristem_Endocortex	Novel	0.00203021	OG0014898
AT5G07830	Meristem_Endocortex	Novel	0.00199988	OG0002061
AT1G69920	Meristem_Endocortex	Novel	0.00198217	OG0010699
AT5G56670	Meristem_Endocortex	Novel	0.00197113	OG0001912
AT3G53870	Meristem_Endocortex	Novel	0.00194722	OG0001445
AT2G44460	Meristem_Endocortex	Novel	0.00192667	OG0008433
AT3G62870	Meristem_Endocortex	Novel	0.00191763	OG0001454
AT2G27530	Meristem_Endocortex	Novel	0.00189775	OG0001759
AT2G23560	Meristem_Endocortex	Novel	0.00188676	OG0000178
AT4G21500	Meristem_Endocortex	Novel	0.00187547	OG0015054
AT4G09320	Meristem_Endocortex	Novel	0.00183109	OG0006621
AT3G06040	Meristem_Endocortex	Novel	0.00177871	OG0011739
AT4G32720	Meristem_Endocortex	Novel	0.00175597	OG0004909
AT5G23395	Meristem_Endocortex	Novel	0.00171914	OG0009633
AT1G17970	Meristem_Endocortex	Novel	0.00170099	OG0002318
AT3G11020	Meristem_Endocortex	Novel	0.0016921	OG0018406
AT5G15610	Meristem_Endocortex	Novel	0.00169028	OG0006515
AT2G33530	Meristem_Endocortex	Novel	0.00168041	OG0001747
AT5G54370	Meristem_Endocortex	Novel	0.0016577	OG0015079
AT5G28640	Meristem_Endocortex	Novel	0.00164624	OG0009770
AT2G48030	Meristem_Endocortex	Novel	0.00159941	OG0005916
AT1G24510	Meristem_Endocortex	Novel	0.00159449	OG0007702
AT3G20050	Meristem_Endocortex	Novel	0.00158945	OG0008517
AT5G07090	Meristem_Endocortex	Novel	0.00157171	OG0002485
AT3G52870	Meristem_Endocortex	Novel	0.00155631	OG0002685
AT4G27270	Meristem_Endocortex	Novel	0.00155132	OG0003628
AT1G33040	Meristem_Endocortex	Novel	0.00153497	OG0017971
AT4G17280	Meristem_Endocortex	Novel	0.00150253	OG0012264
AT3G53630	Meristem_Endocortex	Novel	0.00149014	OG0002319
AT3G10740	Meristem_Endocortex	Novel	0.00148099	OG0003436
AT4G30220	Meristem_Endocortex	Novel	0.00147607	OG0012629
AT4G32710	Meristem_Endocortex	Novel	0.00144892	OG0001085
AT4G11630	Meristem_Endocortex	Novel	0.00142279	OG0004246
AT2G31980	Meristem_Endocortex	Novel	0.00141767	OG0004571
AT3G19595	Meristem_Endocortex	Novel	0.00141636	OG0001810
AT2G25150	Meristem_Endocortex	Novel	0.00141012	OG0011312
AT5G38790	Meristem_Endocortex	Novel	0.00140003	OG0004818
AT2G23110	Meristem_Endocortex	Novel	0.00139292	OG0006009
AT5G43650	Meristem_Endocortex	Novel	0.00137073	OG0015246
AT5G03760	Meristem_Endocortex	Novel	0.00136377	OG0000703
AT3G59620	Meristem_Endocortex	Novel	0.00135756	OG0005837
AT1G48480	Meristem_Endocortex	Novel	0.0013298	OG0001412
AT5G44670	Meristem_Endocortex	Novel	0.00128035	OG0008524
AT1G67750	Meristem_Endocortex	Novel	0.00127128	OG0000589
AT1G70640	Meristem_Endocortex	Novel	0.00125139	OG0007534
AT2G22930	Meristem_Endocortex	Novel	0.00122299	OG0000564
AT3G25640	Meristem_Endocortex	Novel	0.00114665	OG0003487
AT4G26200	Meristem_Endocortex	Novel	0.00110433	OG0009081
AT1G03110	Meristem_Endocortex	Novel	0.00105819	OG0010782
AT5G47220	Meristem_Endocortex	Novel	0.0010271	OG0001854
AT1G63050	Meristem_Endocortex	Novel	0.00102565	OG0002950
AT5G38010	Meristem_Endocortex	Novel	0.0010188	OG0000754
AT3G62060	Meristem_Endocortex	Novel	0.0010135	OG0008130
AT3G11070	Meristem_Endocortex	Novel	0.000992477	OG0006304
AT1G16390	Meristem_Endocortex	Novel	0.000986335	OG0001684
AT1G79180	Meristem_Endocortex	Novel	0.000964181	OG0017693
AT2G38380	Meristem_Endocortex	Novel	0.000931966	OG0004523
AT1G02205	Meristem_Endocortex	Novel	0.000915755	OG0001108
AT2G44195	Meristem_Endocortex	Novel	0.000901629	OG0004382
AT5G13470	Meristem_Endocortex	Novel	0.000882169	OG0002083
AT2G28000	Meristem_Endocortex	Novel	0.000849018	OG0008397
AT5G34940	Meristem_Endocortex	Novel	0.000842355	OG0003788
AT5G06730	Meristem_Endocortex	Novel	0.000838905	OG0003753
AT1G01370	Meristem_Endocortex	Novel	0.000773434	OG0014619
AT5G18290	Meristem_Endocortex	Novel	0.000729183	OG0002588
AT5G26310	Meristem_Endocortex	Novel	0.000714623	OG0011844
AT1G79120	Meristem_Endocortex	Novel	0.000688772	OG0007602
AT1G72490	Meristem_Endocortex	Novel	0.000655516	OG0001668
AT5G45210	Meristem_Endocortex	Novel	0.000568143	OG0002551
AT5G17260	Meristem_Endocortex	Novel	0.000430299	OG0018323
AT1G19320	Meristem_Endocortex	Novel	0.00042461	OG0001679
AT1G28630	Meristem_Endocortex	Novel	0.000382493	OG0017813
AT2G46640	Meristem_Endocortex	Novel	0.000368252	OG0014879
AT4G16270	Meristem_Endocortex	Novel	0.000282179	OG0015077
AT1G18590	Meristem_Endocortex	Novel	0.000271432	OG0002346
AT1G78922	Meristem_Endocortex	Novel	0.000223493	OG0014726
AT5G10140	Meristem_Endocortex	Novel	0.000166904	OG0005828
AT2G29340	Meristem_Endocortex	Novel	0.000103444	OG0002974
AT4G27140	Meristem_Endocortex	Novel	6.20622e-05	OG0008988
AT4G15490	Meristem_Endocortex	Novel	5.35895e-05	OG0000937
AT5G18600	Meristem_Endocortex	Novel	3.86337e-05	OG0000136
AT3G26200	Meristem_Endocortex	Novel	3.17736e-05	OG0000187
AT1G06350	Meristem_Endocortex	Novel	2.58857e-05	OG0003192
AT1G15590	Meristem_Endocortex	Novel	2.49123e-05	OG0003967
AT5G39820	Meristem_Endocortex	Novel	9.75426e-06	OG0001702
AT5G04080	Phloem	Novel	0.0180605	OG0009480
AT1G79430	Phloem	Novel	0.00974193	OG0014711
AT3G21770	Phloem	Novel	0.00909983	OG0000492
AT5G50720	Phloem	Novel	0.00886983	OG0001195
AT5G59090	Phloem	Novel	0.00859277	OG0000436
AT1G62380	Phloem	Novel	0.00819695	OG0018003
AT3G15650	Phloem	Novel	0.00809395	OG0000497
AT5G53120	Phloem	Novel	0.00804199	OG0007010
AT4G39700	Phloem	Novel	0.00762758	OG0003653
AT4G27450	Phloem	Novel	0.00724396	OG0003497
AT3G43270	Phloem	Novel	0.00700362	OG0006399
AT5G43380	Phloem	Novel	0.00665757	OG0000227
AT5G63990	Phloem	Novel	0.00653043	OG0002813
AT2G36650	Phloem	Novel	0.00633572	OG0018166
AT5G43870	Phloem	Novel	0.00619185	OG0001507
AT5G66440	Phloem	Novel	0.00611371	OG0013005
AT5G54660	Phloem	Novel	0.00575276	OG0009529
AT2G16740	Phloem	Novel	0.00564998	OG0000125
AT1G07640	Phloem	Novel	0.00545186	OG0018018
AT1G78520	Phloem	Novel	0.00536979	OG0001781
AT5G42146	Phloem	Novel	0.00535272	OG0013245
AT4G33660	Phloem	Novel	0.00534041	OG0006651
AT5G57350	Phloem	Novel	0.00532466	OG0000087
AT5G10625	Phloem	Novel	0.00521614	OG0001201
AT5G11100	Phloem	Novel	0.00495368	OG0000688
AT5G01750	Phloem	Novel	0.00494256	OG0003065
AT3G15353	Phloem	Novel	0.00492653	OG0014958
AT2G21060	Phloem	Novel	0.00492466	OG0001111
AT4G29690	Phloem	Novel	0.00482089	OG0015116
AT1G10380	Phloem	Novel	0.00479309	OG0014628
AT1G43650	Phloem	Novel	0.00469357	OG0000419
AT1G80690	Phloem	Novel	0.00466277	OG0014627
AT1G08160	Phloem	Novel	0.00463015	OG0007740
AT1G80120	Phloem	Novel	0.00450179	OG0004077
AT5G64240	Phloem	Novel	0.00447799	OG0015266
AT4G38580	Phloem	Novel	0.00439663	OG0006631
AT1G14730	Phloem	Novel	0.00437744	OG0007514
AT5G62940	Phloem	Novel	0.00430907	OG0006848
AT3G60490	Phloem	Novel	0.00419627	OG0018069
AT5G60200	Phloem	Novel	0.00416618	OG0000571
AT3G04300	Phloem	Novel	0.00404882	OG0001514
AT2G31940	Phloem	Novel	0.00401996	OG0008129
AT2G41300	Phloem	Novel	0.00399851	OG0000495
AT2G19460	Phloem	Novel	0.00397411	OG0000376
AT5G47920	Phloem	Novel	0.00396074	OG0005073
AT4G21310	Phloem	Novel	0.00392695	OG0002266
AT5G55180	Phloem	Novel	0.00382548	OG0004525
AT1G77885	Phloem	Novel	0.00381081	OG0017826
AT2G18196	Phloem	Novel	0.00378076	OG0011401
AT1G35780	Phloem	Novel	0.00368835	OG0003109
AT2G32990	Phloem	Novel	0.00366306	OG0004511
AT3G45610	Phloem	Novel	0.00364925	OG0000571
AT3G06035	Phloem	Novel	0.00361864	OG0003416
AT5G18970	Phloem	Novel	0.00359493	OG0015226
AT5G48960	Phloem	Novel	0.00353916	OG0012808
AT2G28810	Phloem	Novel	0.00350933	OG0018018
AT2G27550	Phloem	Novel	0.00344863	OG0000511
AT3G55370	Phloem	Novel	0.00342101	OG0000886
AT4G26840	Phloem	Novel	0.00330325	OG0002755
AT2G03500	Phloem	Novel	0.00329096	OG0011477
AT3G12730	Phloem	Novel	0.00328311	OG0000942
AT5G40980	Phloem	Novel	0.00325984	OG0006522
AT5G55730	Phloem	Novel	0.00318125	OG0000952
AT5G24570	Phloem	Novel	0.00316628	OG0012480
AT2G20750	Phloem	Novel	0.00313941	OG0008389
AT3G05900	Phloem	Novel	0.00313654	OG0014923
AT3G14780	Phloem	Novel	0.00312076	OG0018293
AT2G46630	Phloem	Novel	0.00311739	OG0008442
AT5G54640	Phloem	Novel	0.00309168	OG0001293
AT2G42910	Phloem	Novel	0.00308472	OG0004565
AT1G18880	Phloem	Novel	0.00301649	OG0001366
AT4G34560	Phloem	Novel	0.00301497	OG0009213
AT5G40960	Phloem	Novel	0.00300494	OG0006837
AT3G01950	Phloem	Novel	0.00298806	OG0018245
AT1G23530	Phloem	Novel	0.00295553	OG0017724
AT4G35100	Phloem	Novel	0.00293324	OG0018590
AT2G44940	Phloem	Novel	0.00290057	OG0018069
AT3G12090	Phloem	Novel	0.00286829	OG0003457
AT3G22910	Phloem	Novel	0.00283614	OG0006299
AT3G24770	Phloem	Novel	0.00281157	OG0014913
AT3G61820	Phloem	Novel	0.0028067	OG0002391
AT1G68430	Phloem	Novel	0.00279701	OG0003206
AT2G37590	Phloem	Novel	0.00275287	OG0000886
AT2G31085	Phloem	Novel	0.00271887	OG0008455
AT1G24100	Phloem	Novel	0.00267618	OG0007889
AT5G37770	Phloem	Novel	0.00267595	OG0001357
AT2G32280	Phloem	Novel	0.00267584	OG0002266
AT3G44220	Phloem	Novel	0.0026713	OG0001931
AT1G07920	Phloem	Novel	0.00259597	OG0000174
AT5G65280	Phloem	Novel	0.00256996	OG0018751
AT4G28270	Phloem	Novel	0.00251964	OG0001297
AT1G52140	Phloem	Novel	0.00242794	OG0001768
AT5G35670	Phloem	Novel	0.00241925	OG0015177
AT1G61820	Phloem	Novel	0.00240606	OG0000494
AT4G16480	Phloem	Novel	0.00238753	OG0004551
AT1G70710	Phloem	Novel	0.00238282	OG0004025
AT5G63850	Phloem	Novel	0.0023477	OG0015149
AT3G62600	Phloem	Novel	0.00234002	OG0006498
AT4G17220	Phloem	Novel	0.00233472	OG0009031
AT4G35985	Phloem	Novel	0.00232954	OG0003304
AT1G29160	Phloem	Novel	0.00232161	OG0001405
AT5G58110	Phloem	Novel	0.00232075	OG0012720
AT1G29520	Phloem	Novel	0.00231479	OG0005481
AT3G63200	Phloem	Novel	0.002293	OG0018425
AT1G66180	Phloem	Novel	0.00228065	OG0010743
AT5G50150	Phloem	Novel	0.00227648	OG0000689
AT5G18130	Phloem	Novel	0.00226822	OG0006367
AT5G59080	Phloem	Novel	0.00226351	OG0000606
AT3G18950	Phloem	Novel	0.00220549	OG0000479
AT3G51260	Phloem	Novel	0.00220375	OG0003525
AT3G17790	Phloem	Novel	0.00218181	OG0014890
AT3G62070	Phloem	Novel	0.0021378	OG0005949
AT4G15680	Phloem	Novel	0.00213023	OG0000136
AT5G06850	Phloem	Novel	0.00212711	OG0000372
AT4G19840	Phloem	Novel	0.00210173	OG0003120
AT1G70990	Phloem	Novel	0.00209642	OG0014455
AT4G14740	Phloem	Novel	0.00207532	OG0001507
AT2G32020	Phloem	Novel	0.00206637	OG0001486
AT4G34555	Phloem	Novel	0.00205601	OG0003344
AT3G54000	Phloem	Novel	0.00204064	OG0001555
AT5G23370	Phloem	Novel	0.00203768	OG0000268
AT1G31770	Phloem	Novel	0.00200748	OG0007446
AT3G14310	Phloem	Novel	0.00200315	OG0002252
AT3G28455	Phloem	Novel	0.00200278	OG0001549
AT1G31880	Phloem	Novel	0.00199215	OG0000808
AT2G43050	Phloem	Novel	0.00198786	OG0011610
AT2G05760	Phloem	Novel	0.0019817	OG0004513
AT3G04600	Phloem	Novel	0.00194676	OG0011850
AT5G44350	Phloem	Novel	0.00193942	OG0012401
AT5G54900	Phloem	Novel	0.00192804	OG0000592
AT2G38640	Phloem	Novel	0.00192453	OG0000618
AT1G74060	Phloem	Novel	0.00190365	OG0001374
AT5G23860	Phloem	Novel	0.00186294	OG0000101
AT3G15680	Phloem	Novel	0.00186023	OG0006277
AT4G03210	Phloem	Novel	0.00185616	OG0006585
AT5G11990	Phloem	Novel	0.0018488	OG0009365
AT5G22090	Phloem	Novel	0.00180394	OG0012806
AT3G21600	Phloem	Novel	0.00180284	OG0006408
AT5G13880	Phloem	Novel	0.00180057	OG0005073
AT1G02380	Phloem	Novel	0.00177149	OG0017908
AT2G02230	Phloem	Novel	0.00176337	OG0000698
AT5G52920	Phloem	Novel	0.00173945	OG0015257
AT1G12550	Phloem	Novel	0.00171479	OG0007947
AT1G74055	Phloem	Novel	0.00170628	OG0004282
AT5G57130	Phloem	Novel	0.00166179	OG0003661
AT2G38550	Phloem	Novel	0.00163669	OG0006068
AT1G23550	Phloem	Novel	0.00160482	OG0001311
AT1G24735	Phloem	Novel	0.00160222	OG0011212
AT5G02750	Phloem	Novel	0.00159751	OG0009438
AT2G37925	Phloem	Novel	0.00159554	OG0000898
AT3G17010	Phloem	Novel	0.00159162	OG0004429
AT3G61380	Phloem	Novel	0.00158007	OG0005854
AT4G02810	Phloem	Novel	0.0015659	OG0017761
AT4G20240	Phloem	Novel	0.00153728	OG0000084
AT1G78580	Phloem	Novel	0.00149855	OG0005673
AT1G05200	Phloem	Novel	0.00148592	OG0003105
AT2G27740	Phloem	Novel	0.00147508	OG0001148
AT1G50060	Phloem	Novel	0.0014736	OG0010628
AT5G27990	Phloem	Novel	0.0014559	OG0008771
AT1G11570	Phloem	Novel	0.00143887	OG0001711
AT5G23170	Phloem	Novel	0.00143436	OG0013055
AT4G20270	Phloem	Novel	0.00143341	OG0018551
AT1G71870	Phloem	Novel	0.00139659	OG0010648
AT1G11915	Phloem	Novel	0.00138953	OG0011097
AT3G21420	Phloem	Novel	0.00138153	OG0012181
AT3G63300	Phloem	Novel	0.00135821	OG0001507
AT1G63820	Phloem	Novel	0.00133644	OG0014607
AT4G15670	Phloem	Novel	0.00132545	OG0000136
AT3G60720	Phloem	Novel	0.00131363	OG0006401
AT5G49320	Phloem	Novel	0.00130982	OG0012801
AT1G54770	Phloem	Novel	0.001276	OG0005620
AT4G18440	Phloem	Novel	0.00126082	OG0005581
AT2G15680	Phloem	Novel	0.00125845	OG0008095
AT1G60770	Phloem	Novel	0.00125803	OG0010735
AT5G39850	Phloem	Novel	0.00124446	OG0002811
AT5G40150	Phloem	Novel	0.00123658	OG0002662
AT4G05220	Phloem	Novel	0.00122305	OG0005618
AT2G39830	Phloem	Novel	0.00121457	OG0005961
AT5G37250	Phloem	Novel	0.00120994	OG0006925
AT2G04280	Phloem	Novel	0.00120602	OG0004521
AT2G02000	Phloem	Novel	0.00118484	OG0000258
AT5G61600	Phloem	Novel	0.00117895	OG0003713
AT4G15660	Phloem	Novel	0.00117331	OG0000136
AT5G56530	Phloem	Novel	0.00116146	OG0001075
AT2G21560	Phloem	Novel	0.00113839	OG0018140
AT3G10986	Phloem	Novel	0.00113106	OG0014978
AT3G63050	Phloem	Novel	0.00112944	OG0018206
AT2G35790	Phloem	Novel	0.00111953	OG0006128
AT3G19430	Phloem	Novel	0.00109771	OG0000517
AT1G21140	Phloem	Novel	0.00108714	OG0000357
AT5G56050	Phloem	Novel	0.00108553	OG0006574
AT3G16490	Phloem	Novel	0.00108288	OG0001359
AT4G23750	Phloem	Novel	0.00107725	OG0012341
AT2G16850	Phloem	Novel	0.00104296	OG0018063
AT4G31730	Phloem	Novel	0.00103589	OG0006131
AT3G01680	Phloem	Novel	0.00102861	OG0006418
AT4G26780	Phloem	Novel	0.00101124	OG0002756
AT4G26960	Phloem	Novel	0.000974349	OG0018581
AT1G33080	Phloem	Novel	0.000973291	OG0000588
AT2G34570	Phloem	Novel	0.000953306	OG0008265
AT2G02130	Stele1	Novel	0.00806751	OG0001030
AT5G24800	Stele1	Novel	0.00544274	OG0009680
AT1G26450	Stele1	Novel	0.00522422	OG0017888
AT1G70670	Stele1	Novel	0.00471589	OG0001315
AT2G31083	Stele1	Novel	0.00470662	OG0008455
AT1G71692	Stele1	Novel	0.00461006	OG0004288
AT3G61850	Stele1	Novel	0.00428299	OG0008480
AT5G05790	Stele1	Novel	0.00427879	OG0012034
AT1G44800	Stele1	Novel	0.00418732	OG0002249
AT4G22570	Stele1	Novel	0.00394388	OG0002277
AT3G49760	Stele1	Novel	0.00372744	OG0011412
AT1G77020	Stele1	Novel	0.00355832	OG0010789
AT1G43910	Stele1	Novel	0.00332607	OG0007463
AT2G44130	Stele1	Novel	0.00329254	OG0018152
AT2G05830	Stele1	Novel	0.00325229	OG0006062
AT3G11630	Stele1	Novel	0.00307686	OG0006296
AT5G05220	Stele1	Novel	0.00295248	OG0013083
AT2G29530	Stele1	Novel	0.00294513	OG0004602
AT5G19875	Stele1	Novel	0.00289089	OG0008129
AT3G61990	Stele1	Novel	0.00285935	OG0008890
AT3G59690	Stele1	Novel	0.00279433	OG0006150
AT5G19260	Stele1	Novel	0.00275952	OG0008536
AT4G13850	Stele1	Novel	0.00269006	OG0002605
AT3G49010	Stele1	Novel	0.00265227	OG0002643
AT3G48930	Stele1	Novel	0.002647	OG0000930
AT5G24580	Stele1	Novel	0.00258772	OG0013037
AT5G37660	Stele1	Novel	0.00258284	OG0015276
AT3G45700	Stele1	Novel	0.00255622	OG0000437
AT5G18690	Stele1	Novel	0.0024993	OG0004485
AT3G23390	Stele1	Novel	0.00249684	OG0001185
AT1G70600	Stele1	Novel	0.00248791	OG0004023
AT3G62530	Stele1	Novel	0.00245257	OG0018248
AT5G28060	Stele1	Novel	0.00239963	OG0000627
AT2G33370	Stele1	Novel	0.00238891	OG0000832
AT4G34670	Stele1	Novel	0.00237582	OG0000932
AT4G36130	Stele1	Novel	0.00236614	OG0002512
AT5G58420	Stele1	Novel	0.00235709	OG0002485
AT2G36170	Stele1	Novel	0.00234423	OG0003390
AT5G02450	Stele1	Novel	0.00234247	OG0002462
AT2G27710	Stele1	Novel	0.00233196	OG0000377
AT1G23760	Stele1	Novel	0.00232531	OG0000824
AT5G28080	Stele1	Novel	0.00231909	OG0004747
AT4G29410	Stele1	Novel	0.00230785	OG0006112
AT5G64140	Stele1	Novel	0.00228767	OG0004675
AT3G26760	Stele1	Novel	0.00225687	OG0001988
AT4G31700	Stele1	Novel	0.00217557	OG0003610
AT3G48510	Stele1	Novel	0.00216489	OG0001533
AT3G56340	Stele1	Novel	0.00215746	OG0002481
AT5G02870	Stele1	Novel	0.0021418	OG0001531
AT5G59850	Stele1	Novel	0.00214009	OG0001792
AT5G13910	Stele1	Novel	0.00210701	OG0006734
AT5G02960	Stele1	Novel	0.0021066	OG0001173
AT4G27760	Stele1	Novel	0.00209175	OG0004926
AT5G57120	Stele1	Novel	0.00208354	OG0009579
AT3G52580	Stele1	Novel	0.00204327	OG0002565
AT5G23360	Stele1	Novel	0.00203641	OG0000268
AT3G05560	Stele1	Novel	0.00202136	OG0002622
AT5G23350	Stele1	Novel	0.00201138	OG0000268
AT2G44120	Stele1	Novel	0.00201032	OG0000924
AT2G18876	Stele1	Novel	0.00200646	OG0008196
AT1G61260	Stele1	Novel	0.00199555	OG0007637
AT5G14340	Stele1	Novel	0.00196617	OG0000321
AT4G39880	Stele1	Novel	0.00196099	OG0012543
AT2G19750	Stele1	Novel	0.00194875	OG0001912
AT5G48480	Stele1	Novel	0.00194605	OG0018633
AT1G54500	Stele1	Novel	0.00194145	OG0002958
AT5G07030	Stele1	Novel	0.00193762	OG0008751
AT1G41880	Stele1	Novel	0.00193377	OG0001017
AT4G09800	Stele1	Novel	0.0019271	OG0001342
AT5G23535	Stele1	Novel	0.00192011	OG0009688
AT3G30580	Stele1	Novel	0.00191395	OG0004818
AT3G11280	Stele1	Novel	0.00189723	OG0012034
AT5G56500	Stele1	Novel	0.00188733	OG0000587
AT5G48760	Stele1	Novel	0.00187298	OG0002612
AT5G14800	Stele1	Novel	0.00187074	OG0009756
AT5G08350	Stele1	Novel	0.00185302	OG0000268
AT1G14620	Stele1	Novel	0.00185024	OG0007502
AT5G02740	Stele1	Novel	0.00184846	OG0009844
AT3G60140	Stele1	Novel	0.00183094	OG0008433
AT2G47610	Stele1	Novel	0.00182605	OG0001454
AT5G50810	Stele1	Novel	0.00181911	OG0006929
AT2G20585	Stele1	Novel	0.00181462	OG0001813
AT4G24670	Stele1	Novel	0.00179852	OG0000556
AT3G53460	Stele1	Novel	0.00178568	OG0002513
AT1G74560	Stele1	Novel	0.00177729	OG0003106
AT3G04230	Stele1	Novel	0.00177398	OG0001485
AT1G32580	Stele1	Novel	0.00175417	OG0017975
AT1G74458	Stele1	Novel	0.00175391	OG0000375
AT3G26610	Stele1	Novel	0.00173285	OG0012062
AT5G44160	Stele1	Novel	0.001719	OG0000476
AT3G30180	Stele1	Novel	0.00171674	OG0004629
AT3G23990	Stele1	Novel	0.00171598	OG0002517
AT3G59670	Stele1	Novel	0.0017158	OG0001516
AT3G13580	Stele1	Novel	0.0016953	OG0000924
AT1G18080	Stele1	Novel	0.00167742	OG0001423
AT5G16570	Stele1	Novel	0.00167694	OG0000500
AT1G58380	Stele1	Novel	0.00166983	OG0001045
AT3G44720	Stele1	Novel	0.00166548	OG0018247
AT5G62440	Stele1	Novel	0.00163829	OG0006867
AT3G46560	Stele1	Novel	0.00161058	OG0012086
AT3G55690	Stele1	Novel	0.00158003	OG0018102
AT3G17690	Stele1	Novel	0.0015692	OG0006237
AT1G74090	Stele1	Novel	0.00156784	OG0002346
AT3G19680	Stele1	Novel	0.00154154	OG0017717
AT2G44300	Stele1	Novel	0.00152649	OG0003385
AT4G24770	Stele1	Novel	0.00152053	OG0001560
AT4G18340	Stele1	Novel	0.00151324	OG0007658
AT5G58590	Stele1	Novel	0.00150794	OG0001040
AT3G47540	Stele1	Novel	0.00148931	OG0001138
AT1G63980	Stele1	Novel	0.00147638	OG0011008
AT3G22660	Stele1	Novel	0.00143691	OG0006398
AT5G44530	Stele1	Novel	0.00143619	OG0002733
AT1G66190	Stele1	Novel	0.00142403	OG0017792
AT5G11880	Stele1	Novel	0.00142251	OG0006297
AT3G29240	Stele1	Novel	0.00139227	OG0011751
AT3G23620	Stele1	Novel	0.00138854	OG0008825
AT1G68130	Stele1	Novel	0.00138129	OG0000847
AT4G31360	Stele1	Novel	0.00137272	OG0006087
AT5G62670	Stele1	Novel	0.00137269	OG0000087
AT1G61580	Stele1	Novel	0.00136282	OG0001061
AT1G16350	Stele1	Novel	0.00135329	OG0003997
AT1G21090	Stele1	Novel	0.00134841	OG0007434
AT5G47720	Stele1	Novel	0.00134186	OG0002068
AT3G11710	Stele1	Novel	0.00134021	OG0008675
AT2G20060	Stele1	Novel	0.0013367	OG0011437
AT1G73940	Stele1	Novel	0.00133266	OG0014655
AT3G62040	Stele1	Novel	0.00133107	OG0011861
AT1G04870	Stele1	Novel	0.00131871	OG0011230
AT2G40660	Stele1	Novel	0.00130242	OG0006033
AT5G44005	Stele1	Novel	0.00130108	OG0003749
AT2G35605	Stele1	Novel	0.00129303	OG0002217
AT4G29510	Stele1	Novel	0.00128843	OG0005928
AT2G35240	Stele1	Novel	0.00127471	OG0017975
AT2G27970	Stele1	Novel	0.0012486	OG0011611
AT2G44270	Stele1	Novel	0.00124125	OG0005421
AT4G29140	Stele1	Novel	0.00124001	OG0012438
AT5G51220	Stele1	Novel	0.00123254	OG0012677
AT4G23620	Stele1	Novel	0.00123143	OG0006732
AT5G62820	Stele1	Novel	0.00120842	OG0003391
AT4G12390	Stele1	Novel	0.00120388	OG0000480
AT1G64880	Stele1	Novel	0.00119723	OG0007779
AT3G49470	Stele1	Novel	0.00119305	OG0000620
AT5G66860	Stele1	Novel	0.00118703	OG0012657
AT4G36420	Stele1	Novel	0.00116656	OG0009112
AT3G49080	Stele1	Novel	0.00114503	OG0006294
AT3G07430	Stele1	Novel	0.00114366	OG0008653
AT4G26430	Stele1	Novel	0.00113563	OG0009037
AT3G11150	Stele1	Novel	0.00113086	OG0011911
AT3G56620	Stele1	Novel	0.0011235	OG0018061
AT5G46160	Stele1	Novel	0.00111471	OG0012882
AT4G32605	Stele1	Novel	0.00110593	OG0012605
AT1G16310	Stele1	Novel	0.00108767	OG0002984
AT2G32960	Stele1	Novel	0.00108266	OG0018039
AT2G28790	Stele1	Novel	0.00107559	OG0011563
AT2G38970	Stele1	Novel	0.00107068	OG0014845
AT4G23500	Stele1	Novel	0.00105635	OG0000910
AT2G34260	Stele1	Novel	0.00105449	OG0011565
AT3G13160	Stele1	Novel	0.0010527	OG0001286
AT2G04030	Stele1	Novel	0.00105146	OG0008416
AT5G09270	Stele1	Novel	0.00104902	OG0013217
AT5G64080	Stele1	Novel	0.00104329	OG0000893
AT2G21400	Stele1	Novel	0.00104324	OG0000320
AT1G60080	Stele1	Novel	0.00101758	OG0003037
AT2G43360	Stele1	Novel	0.00101429	OG0006109
AT1G73590	Stele1	Novel	0.00100451	OG0005387
AT4G28510	Stele1	Novel	0.00100353	OG0002437
AT5G52820	Stele1	Novel	0.00100077	OG0009442
AT4G14000	Stele1	Novel	0.00100008	OG0009133
AT3G22840	Stele1	Novel	0.000995075	OG0002589
AT1G60850	Stele1	Novel	0.000965453	OG0005490
AT1G80050	Stele1	Novel	0.00096269	OG0002277
AT5G25780	Stele1	Novel	0.000959316	OG0009549
AT3G55605	Stele1	Novel	0.000953372	OG0002498
AT4G15520	Stele1	Novel	0.00094329	OG0012479
AT5G49620	Stele1	Novel	0.000927007	OG0018407
AT2G19720	Stele1	Novel	0.000919318	OG0006015
AT3G61620	Stele1	Novel	0.000913603	OG0014974
AT1G31660	Stele1	Novel	0.000910983	OG0007854
AT5G67160	Stele1	Novel	0.000907556	OG0004768
AT2G42440	Stele1	Novel	0.000902853	OG0008103
AT2G22420	Stele1	Novel	0.00089222	OG0011411
AT1G74930	Stele1	Novel	0.000884538	OG0001006
AT4G30450	Stele1	Novel	0.000883369	OG0006629
AT5G53070	Stele1	Novel	0.000881441	OG0009773
AT4G28410	Stele1	Novel	0.000880998	OG0006105
AT2G19385	Stele1	Novel	0.000852799	OG0008079
AT1G75200	Stele1	Novel	0.000852798	OG0010564
AT3G25717	Stele1	Novel	0.000848978	OG0000477
AT1G48750	Stele1	Novel	0.000841857	OG0001811
AT2G16385	Stele1	Novel	0.000826891	OG0004386
AT4G09810	Stele1	Novel	0.00082612	OG0002347
AT3G14570	Stele1	Novel	0.000809096	OG0018233
AT4G11060	Stele1	Novel	0.000803712	OG0012566
AT5G65340	Stele1	Novel	0.000794903	OG0013091
AT5G06550	Stele1	Novel	0.000791304	OG0012641
AT3G51270	Stele1	Novel	0.000788136	OG0004770
AT2G40900	Stele1	Novel	0.000779919	OG0018061
AT1G02460	Stele1	Novel	0.000776834	OG0004247
AT3G44940	Stele1	Novel	0.000764624	OG0008134
AT4G27490	Stele1	Novel	0.000763998	OG0009155
AT1G12080	Stele2	Novel	0.00898078	OG0017964
AT1G64660	Stele2	Novel	0.00811662	OG0005623
AT1G25530	Stele2	Novel	0.00804501	OG0017915
AT2G13820	Stele2	Novel	0.00796846	OG0000893
AT1G77690	Stele2	Novel	0.0077298	OG0000316
AT1G22710	Stele2	Novel	0.00759896	OG0003003
AT2G46890	Stele2	Novel	0.00717942	OG0008127
AT2G34140	Stele2	Novel	0.00716827	OG0001405
AT3G16330	Stele2	Novel	0.0069237	OG0001768
AT5G46700	Stele2	Novel	0.00671969	OG0013013
AT3G14990	Stele2	Novel	0.00670917	OG0005506
AT5G05690	Stele2	Novel	0.00643915	OG0006984
AT2G40480	Stele2	Novel	0.00641642	OG0018086
AT1G62480	Stele2	Novel	0.00625283	OG0017964
AT5G02380	Stele2	Novel	0.00609751	OG0004805
AT3G49690	Stele2	Novel	0.00601452	OG0001501
AT5G02440	Stele2	Novel	0.00579259	OG0018662
AT4G11210	Stele2	Novel	0.00578622	OG0001069
AT3G25780	Stele2	Novel	0.00575591	OG0002232
AT1G11580	Stele2	Novel	0.00566291	OG0004056
AT4G05120	Stele2	Novel	0.00549086	OG0000711
AT1G66230	Stele2	Novel	0.00544877	OG0000321
AT1G63180	Stele2	Novel	0.00540569	OG0005443
AT3G11930	Stele2	Novel	0.00537177	OG0008854
AT1G32100	Stele2	Novel	0.00532015	OG0000843
AT2G29640	Stele2	Novel	0.00523812	OG0011534
AT2G45470	Stele2	Novel	0.00512444	OG0008241
AT1G66050	Stele2	Novel	0.00511356	OG0000567
AT3G25770	Stele2	Novel	0.00504899	OG0002232
AT1G72230	Stele2	Novel	0.00503522	OG0001379
AT3G23170	Stele2	Novel	0.00482744	OG0007582
AT2G28660	Stele2	Novel	0.0048203	OG0001882
AT1G71880	Stele2	Novel	0.00480745	OG0003003
AT5G54145	Stele2	Novel	0.00476009	OG0012480
AT1G66200	Stele2	Novel	0.00473783	OG0000500
AT1G66600	Stele2	Novel	0.00468178	OG0005703
AT4G31820	Stele2	Novel	0.0046713	OG0009086
AT5G65870	Stele2	Novel	0.00466836	OG0000716
AT1G72150	Stele2	Novel	0.00464576	OG0017739
AT2G37040	Stele2	Novel	0.00461731	OG0000756
AT1G75500	Stele2	Novel	0.0046027	OG0010945
AT2G30400	Stele2	Novel	0.00459967	OG0001334
AT5G03610	Stele2	Novel	0.00456716	OG0004598
AT1G61660	Stele2	Novel	0.0045074	OG0003110
AT3G55420	Stele2	Novel	0.00445004	OG0006416
AT1G76410	Stele2	Novel	0.00442638	OG0000409
AT2G22860	Stele2	Novel	0.0044244	OG0000716
AT5G48070	Stele2	Novel	0.00441236	OG0010871
AT2G46150	Stele2	Novel	0.00438942	OG0005691
AT2G43120	Stele2	Novel	0.00437142	OG0003335
AT4G22212	Stele2	Novel	0.00433955	OG0006544
AT1G22530	Stele2	Novel	0.00433279	OG0017739
AT1G07570	Stele2	Novel	0.00430637	OG0018041
AT2G31360	Stele2	Novel	0.00429425	OG0003192
AT1G52190	Stele2	Novel	0.00428651	OG0002373
AT4G39640	Stele2	Novel	0.00425444	OG0005626
AT4G21960	Stele2	Novel	0.00423437	OG0018576
AT4G18510	Stele2	Novel	0.0042323	OG0017720
AT2G38120	Stele2	Novel	0.00421633	OG0000316
AT2G46600	Stele2	Novel	0.00416257	OG0000430
AT3G16410	Stele2	Novel	0.00415328	OG0005837
AT2G30395	Stele2	Novel	0.00414737	OG0005843
AT1G69080	Stele2	Novel	0.00408902	OG0002980
AT3G29670	Stele2	Novel	0.00404733	OG0001522
AT3G28600	Stele2	Novel	0.00404011	OG0011961
AT5G03960	Stele2	Novel	0.0039394	OG0005792
AT4G36710	Stele2	Novel	0.00393091	OG0018516
AT4G14130	Stele2	Novel	0.00388197	OG0014989
AT4G09160	Stele2	Novel	0.00386795	OG0001789
AT1G70130	Stele2	Novel	0.00384658	OG0001770
AT1G18740	Stele2	Novel	0.00380526	OG0004170
AT2G22850	Stele2	Novel	0.003794	OG0011412
AT5G20885	Stele2	Novel	0.00378981	OG0018368
AT1G45145	Stele2	Novel	0.00378203	OG0010834
AT3G10340	Stele2	Novel	0.00376045	OG0018306
AT1G71050	Stele2	Novel	0.00365729	OG0002321
AT4G01250	Stele2	Novel	0.00365203	OG0002721
AT3G44320	Stele2	Novel	0.00363619	OG0014935
AT2G38750	Stele2	Novel	0.00358793	OG0005885
AT1G79760	Stele2	Novel	0.00358597	OG0010785
AT2G26380	Stele2	Novel	0.00358369	OG0003075
AT4G15340	Stele2	Novel	0.00357903	OG0004267
AT4G39800	Stele2	Novel	0.00356525	OG0001880
AT2G27080	Stele2	Novel	0.00355882	OG0005934
AT1G64740	Stele2	Novel	0.00350257	OG0000254
AT5G43700	Stele2	Novel	0.00347938	OG0000837
AT2G01950	Stele2	Novel	0.00345314	OG0011377
AT3G59930	Stele2	Novel	0.00341187	OG0003234
AT1G52240	Stele2	Novel	0.00339117	OG0017911
AT2G16060	Stele2	Novel	0.00338454	OG0004470
AT2G31345	Stele2	Novel	0.00337465	OG0007944
AT1G14870	Stele2	Novel	0.00331124	OG0000250
AT3G52920	Stele2	Novel	0.00330188	OG0001148
AT4G29840	Stele2	Novel	0.00329895	OG0002384
AT2G34340	Stele2	Novel	0.00328919	OG0004028
AT4G37730	Stele2	Novel	0.00326961	OG0011412
AT5G21105	Stele2	Novel	0.00320977	OG0006934
AT5G57685	Stele2	Novel	0.00320263	OG0002732
AT5G57770	Stele2	Novel	0.00320196	OG0009540
AT2G43910	Stele2	Novel	0.0031966	OG0018096
AT4G13940	Stele2	Novel	0.00317521	OG0006218
AT3G48970	Stele2	Novel	0.00316173	OG0018281
AT5G47230	Stele2	Novel	0.00315568	OG0018541
AT1G13380	Stele2	Novel	0.00314946	OG0010994
AT5G38200	Stele2	Novel	0.00313549	OG0002430
AT5G19190	Stele2	Novel	0.00313533	OG0008530
AT5G48460	Stele2	Novel	0.00312442	OG0009795
AT5G65140	Stele2	Novel	0.00312194	OG0001437
AT5G46590	Stele2	Novel	0.0031133	OG0003198
AT3G48450	Stele2	Novel	0.00307163	OG0018340
AT1G33800	Stele2	Novel	0.00303103	OG0001292
AT3G43250	Stele2	Novel	0.00302963	OG0004356
AT5G07680	Stele2	Novel	0.00302372	OG0000378
AT3G16180	Stele2	Novel	0.00300619	OG0002373
AT2G26400	Stele2	Novel	0.00300443	OG0002521
AT5G52870	Stele2	Novel	0.00294561	OG0006774
AT1G22810	Stele2	Novel	0.00293343	OG0004095
AT1G27730	Stele2	Novel	0.00291504	OG0000325
AT1G62840	Stele2	Novel	0.00290639	OG0002415
AT5G62360	Stele2	Novel	0.00289913	OG0012919
AT2G46690	Stele2	Novel	0.00288551	OG0000513
AT3G11690	Stele2	Novel	0.00283581	OG0000921
AT1G04550	Stele2	Novel	0.00283398	OG0002434
AT1G56340	Stele2	Novel	0.00279375	OG0004006
AT3G06750	Stele2	Novel	0.00279151	OG0008874
AT3G54290	Stele2	Novel	0.00278775	OG0006368
AT5G39670	Stele2	Novel	0.00278048	OG0003512
AT1G30820	Stele2	Novel	0.00277256	OG0000866
AT1G25230	Stele2	Novel	0.00276155	OG0003007
AT5G57560	Stele2	Novel	0.00275824	OG0002731
AT1G04240	Stele2	Novel	0.00274268	OG0000837
AT3G46110	Stele2	Novel	0.00273964	OG0003565
AT1G51950	Stele2	Novel	0.00273319	OG0002311
AT4G37400	Stele2	Novel	0.00273002	OG0000135
AT5G18680	Stele2	Novel	0.0027284	OG0018399
AT4G34600	Stele2	Novel	0.00272775	OG0004386
AT3G55970	Stele2	Novel	0.00271112	OG0000888
AT1G58340	Stele2	Novel	0.00268266	OG0011074
AT4G25700	Stele2	Novel	0.00267327	OG0002734
AT4G39660	Stele2	Novel	0.00267139	OG0009232
AT3G12500	Stele2	Novel	0.00264184	OG0000179
AT5G27000	Stele2	Novel	0.00264103	OG0001320
AT1G73165	Stele2	Novel	0.00261518	OG0017720
AT3G56480	Stele2	Novel	0.00256825	OG0003252
AT1G70800	Stele2	Novel	0.00256453	OG0000249
AT3G53430	Stele2	Novel	0.00255814	OG0000905
AT5G12340	Stele2	Novel	0.00253489	OG0001583
AT3G20898	Stele2	Novel	0.00251545	OG0014446
AT4G39070	Stele2	Novel	0.00248483	OG0002021
AT5G62920	Stele2	Novel	0.00246609	OG0007444
AT1G27400	Stele2	Novel	0.00246234	OG0004105
AT5G07580	Stele2	Novel	0.00242953	OG0012784
AT1G19920	Stele2	Novel	0.00242782	OG0001086
AT4G25810	Stele2	Novel	0.00242692	OG0002731
AT4G03415	Stele2	Novel	0.00242302	OG0003032
AT5G16970	Stele2	Novel	0.00241557	OG0000584
AT2G39570	Stele2	Novel	0.00241383	OG0008421
AT4G33700	Stele2	Novel	0.00238592	OG0000713
AT1G24530	Stele2	Novel	0.0023841	OG0000849
AT5G60800	Stele2	Novel	0.00234252	OG0000757
AT4G17490	Stele2	Novel	0.00232696	OG0018541
AT2G46400	Stele2	Novel	0.00231414	OG0000753
AT2G25790	Stele2	Novel	0.00228929	OG0018139
AT1G33700	Stele2	Novel	0.00228838	OG0017829
AT1G26470	Stele2	Novel	0.0022881	OG0007874
AT4G28720	Stele2	Novel	0.002246	OG0003201
AT5G06570	Stele2	Novel	0.00223928	OG0003685
AT1G80530	Stele2	Novel	0.00223102	OG0001794
AT4G26130	Stele2	Novel	0.00222216	OG0000733
AT3G44735	Stele2	Novel	0.00221049	OG0001553
AT1G78110	Stele2	Novel	0.00219649	OG0004150
AT3G50060	Stele2	Novel	0.00219443	OG0002557
AT1G12140	Stele2	Novel	0.00216749	OG0000315
AT5G33320	Stele2	Novel	0.00215013	OG0005094
AT1G20310	Stele2	Novel	0.00212985	OG0003985
AT1G47670	Stele2	Novel	0.00211865	OG0011011
AT4G39190	Stele2	Novel	0.00210816	OG0018140
AT3G49620	Stele2	Novel	0.0020941	OG0004612
AT5G09800	Stele2	Novel	0.00208532	OG0001177
AT2G15760	Stele2	Novel	0.00205315	OG0004390
AT1G80450	Stele2	Novel	0.00204466	OG0014461
AT3G27060	Stele2	Novel	0.00203008	OG0006468
AT4G28930	Stele2	Novel	0.00201962	OG0015055
AT2G24570	Stele2	Novel	0.00201669	OG0003359
AT3G45010	Stele2	Novel	0.00199625	OG0000623
AT5G59010	Stele2	Novel	0.00199493	OG0000366
AT3G03200	Stele2	Novel	0.00199279	OG0018323
AT3G54150	Stele2	Novel	0.00196658	OG0001104
AT4G34300	Stele2	Novel	0.00196468	OG0018520
AT1G18540	Stele2	Novel	0.00195342	OG0001374
AT4G28250	Stele2	Novel	0.0019496	OG0008389
AT2G22800	Stele2	Novel	0.00194879	OG0011408
AT5G52400	Stele2	Novel	0.00191733	OG0009520
AT3G48550	Stele2	Novel	0.00191589	OG0008897
AT3G06490	Stele2	Novel	0.0019081	OG0018407
AT3G54420	Stele2	Novel	0.00190664	OG0001138
AT5G06530	Stele2	Novel	0.00190556	OG0012638
AT1G52270	Stele2	Novel	0.001902	OG0002374
AT3G51800	Stele2	Novel	0.00189798	OG0006500
AT2G31110	Stele2	Novel	0.00189336	OG0001348
AT4G26010	Trichoblast1	Novel	0.00967316	OG0003025
AT5G67400	Trichoblast1	Novel	0.00961613	OG0000509
AT4G25820	Trichoblast1	Novel	0.00930368	OG0015089
AT4G40090	Trichoblast1	Novel	0.00923394	OG0011617
AT4G02270	Trichoblast1	Novel	0.00903401	OG0005647
AT4G00680	Trichoblast1	Novel	0.00867911	OG0003086
AT4G25790	Trichoblast1	Novel	0.00816611	OG0018546
AT5G57625	Trichoblast1	Novel	0.00801978	OG0018546
AT3G62680	Trichoblast1	Novel	0.00745573	OG0005647
AT5G06630	Trichoblast1	Novel	0.00722057	OG0004415
AT5G04960	Trichoblast1	Novel	0.00712309	OG0011789
AT5G57530	Trichoblast1	Novel	0.00659273	OG0015089
AT5G05500	Trichoblast1	Novel	0.00650427	OG0013196
AT3G49960	Trichoblast1	Novel	0.00623707	OG0000509
AT1G01750	Trichoblast1	Novel	0.00615603	OG0003086
AT1G06923	Trichoblast1	Novel	0.00606493	OG0005843
AT4G30320	Trichoblast1	Novel	0.00604871	OG0012546
AT2G30930	Trichoblast1	Novel	0.00577132	OG0017984
AT5G06640	Trichoblast1	Novel	0.0056107	OG0004415
AT3G54580	Trichoblast1	Novel	0.00545312	OG0010768
AT3G09925	Trichoblast1	Novel	0.00543121	OG0014922
AT5G44610	Trichoblast1	Novel	0.00541145	OG0009323
AT1G62980	Trichoblast1	Novel	0.00526953	OG0007946
AT4G28850	Trichoblast1	Novel	0.00526835	OG0004896
AT2G20520	Trichoblast1	Novel	0.00510761	OG0002400
AT4G13390	Trichoblast1	Novel	0.00505319	OG0004415
AT3G54040	Trichoblast1	Novel	0.00501412	OG0002004
AT4G01110	Trichoblast1	Novel	0.00500636	OG0011273
AT3G54590	Trichoblast1	Novel	0.00498893	OG0010768
AT1G12560	Trichoblast1	Novel	0.00495493	OG0007946
AT1G73580	Trichoblast1	Novel	0.00483957	OG0000249
AT5G43350	Trichoblast1	Novel	0.00483917	OG0000190
AT4G22666	Trichoblast1	Novel	0.0047192	OG0012283
AT2G24980	Trichoblast1	Novel	0.00470102	OG0004415
AT1G01780	Trichoblast1	Novel	0.00469259	OG0010853
AT3G60280	Trichoblast1	Novel	0.00466242	OG0008148
AT1G05810	Trichoblast1	Novel	0.00466031	OG0002431
AT1G01453	Trichoblast1	Novel	0.00460961	OG0011273
AT5G22410	Trichoblast1	Novel	0.00451202	OG0002774
AT5G46870	Trichoblast1	Novel	0.00444752	OG0002736
AT3G05490	Trichoblast1	Novel	0.00438877	OG0002297
AT2G25240	Trichoblast1	Novel	0.00438271	OG0014782
AT1G30870	Trichoblast1	Novel	0.00428445	OG0011021
AT1G34510	Trichoblast1	Novel	0.00425551	OG0003025
AT4G33730	Trichoblast1	Novel	0.00421539	OG0006107
AT4G18430	Trichoblast1	Novel	0.00391928	OG0000415
AT3G18780	Trichoblast1	Novel	0.00379311	OG0000071
AT5G42510	Trichoblast1	Novel	0.00372878	OG0007464
AT5G53250	Trichoblast1	Novel	0.00372476	OG0000514
AT1G08340	Trichoblast1	Novel	0.00357874	OG0003102
AT4G22080	Trichoblast1	Novel	0.0035294	OG0010944
AT2G39518	Trichoblast1	Novel	0.00350265	OG0001134
AT1G54970	Trichoblast1	Novel	0.00348811	OG0005647
AT3G17600	Trichoblast1	Novel	0.00335934	OG0011771
AT1G11655	Trichoblast1	Novel	0.00330071	OG0011129
AT1G60810	Trichoblast1	Novel	0.00329325	OG0002209
AT2G38500	Trichoblast1	Novel	0.00327605	OG0014840
AT2G46860	Trichoblast1	Novel	0.00326712	OG0000287
AT1G47740	Trichoblast1	Novel	0.00325933	OG0002363
AT5G35190	Trichoblast1	Novel	0.00320934	OG0004415
AT1G02570	Trichoblast1	Novel	0.00319713	OG0014644
AT4G25220	Trichoblast1	Novel	0.00316217	OG0017923
AT2G47360	Trichoblast1	Novel	0.00304221	OG0014644
AT4G08400	Trichoblast1	Novel	0.00304051	OG0004415
AT1G72430	Trichoblast1	Novel	0.00295019	OG0017734
AT5G50200	Trichoblast1	Novel	0.00290725	OG0005038
AT2G03720	Trichoblast1	Novel	0.00288418	OG0002980
AT2G47950	Trichoblast1	Novel	0.00288026	OG0018122
AT5G26080	Trichoblast1	Novel	0.00270465	OG0008885
AT3G14350	Trichoblast1	Novel	0.00269387	OG0001431
AT4G08410	Trichoblast1	Novel	0.00267084	OG0004415
AT5G59520	Trichoblast1	Novel	0.00265682	OG0009797
AT1G34750	Trichoblast1	Novel	0.00261945	OG0004299
AT3G23870	Trichoblast1	Novel	0.0025854	OG0006402
AT1G20050	Trichoblast1	Novel	0.00251248	OG0005766
AT3G60245	Trichoblast1	Novel	0.0024564	OG0003476
AT3G03000	Trichoblast1	Novel	0.00242228	OG0010793
AT5G19800	Trichoblast1	Novel	0.00241714	OG0008885
AT5G24880	Trichoblast1	Novel	0.0023641	OG0018696
AT5G51780	Trichoblast1	Novel	0.00235191	OG0002407
AT3G07490	Trichoblast1	Novel	0.00227082	OG0004713
AT4G31250	Trichoblast1	Novel	0.00223314	OG0001046
AT1G57720	Trichoblast1	Novel	0.00220296	OG0000679
AT2G03980	Trichoblast1	Novel	0.00217036	OG0018175
AT1G55290	Trichoblast1	Novel	0.00210888	OG0007858
AT1G34760	Trichoblast1	Novel	0.00210305	OG0017968
AT1G60050	Trichoblast1	Novel	0.002095	OG0005502
AT1G12040	Trichoblast1	Novel	0.00204147	OG0005760
AT3G56230	Trichoblast1	Novel	0.00203771	OG0003158
AT5G54100	Trichoblast1	Novel	0.00203523	OG0002012
AT4G33110	Trichoblast1	Novel	0.00201714	OG0002749
AT3G07070	Trichoblast1	Novel	0.00193489	OG0003128
AT2G33460	Trichoblast1	Novel	0.00191735	OG0017755
AT4G33880	Trichoblast1	Novel	0.00189504	OG0018223
AT1G07210	Trichoblast1	Novel	0.00189349	OG0005496
AT5G44130	Trichoblast1	Novel	0.00188401	OG0002400
AT1G25240	Trichoblast1	Novel	0.0018548	OG0001693
AT2G34330	Trichoblast1	Novel	0.00168474	OG0017754
AT5G19790	Trichoblast1	Novel	0.00166793	OG0002782
AT4G29800	Trichoblast1	Novel	0.00164781	OG0004421
AT1G25422	Trichoblast1	Novel	0.0016123	OG0014678
AT1G48640	Trichoblast1	Novel	0.00161019	OG0000498
AT3G60540	Trichoblast1	Novel	0.00159101	OG0004479
AT1G22500	Trichoblast1	Novel	0.00157236	OG0010626
AT1G77870	Trichoblast1	Novel	0.00156889	OG0003148
AT2G22290	Trichoblast1	Novel	0.001547	OG0002487
AT5G54240	Trichoblast1	Novel	0.00153185	OG0009096
AT1G63450	Trichoblast1	Novel	0.00151391	OG0010723
AT3G18450	Trichoblast1	Novel	0.0014723	OG0011059
AT4G04900	Trichoblast1	Novel	0.00146799	OG0000330
AT5G63270	Trichoblast1	Novel	0.001463	OG0018340
AT3G46900	Trichoblast1	Novel	0.00145966	OG0000898
AT5G57540	Trichoblast1	Novel	0.00145119	OG0015089
AT2G16760	Trichoblast1	Novel	0.00144613	OG0002504
AT1G55020	Trichoblast1	Novel	0.00143216	OG0000188
AT3G07195	Trichoblast1	Novel	0.00141114	OG0018324
AT1G72200	Trichoblast1	Novel	0.00136725	OG0010626
AT1G16440	Trichoblast1	Novel	0.0013184	OG0003006
AT5G43175	Trichoblast1	Novel	0.00131323	OG0004151
AT4G34930	Trichoblast1	Novel	0.00121741	OG0002735
AT5G24190	Trichoblast1	Novel	0.00120302	OG0006986
AT5G07450	Trichoblast1	Novel	0.00116494	OG0005947
AT1G01660	Trichoblast1	Novel	0.00114877	OG0002380
AT5G41761	Trichoblast1	Novel	0.00114042	OG0001241
AT5G23160	Trichoblast1	Novel	0.00113126	OG0006735
AT4G22640	Trichoblast1	Novel	0.00112932	OG0012283
AT1G34520	Trichoblast1	Novel	0.00111809	OG0000251
AT1G69240	Trichoblast1	Novel	0.00110459	OG0017726
AT3G59340	Trichoblast1	Novel	0.00110409	OG0002639
AT2G47530	Trichoblast1	Novel	0.00101819	OG0005647
AT3G24300	Trichoblast1	Novel	0.00101077	OG0001984
AT4G21745	Trichoblast1	Novel	0.000970387	OG0000330
AT3G07600	Trichoblast1	Novel	0.000927923	OG0000162
AT1G09860	Trichoblast1	Novel	0.000921238	OG0004053
AT4G13620	Trichoblast1	Novel	0.000907339	OG0018513
AT1G34540	Trichoblast1	Novel	0.000880577	OG0003030
AT3G20557	Trichoblast1	Novel	0.000780727	OG0002206
AT1G29540	Trichoblast1	Novel	0.000680453	OG0017754
AT1G24620	Trichoblast1	Novel	0.000571187	OG0014564
AT5G67450	Trichoblast1	Novel	0.000555575	OG0006289
AT1G35290	Trichoblast1	Novel	0.000525483	OG0001817
AT5G14410	Trichoblast1	Novel	0.000510956	OG0005114
AT4G00130	Trichoblast1	Novel	0.000498731	OG0000279
AT5G23020	Trichoblast1	Novel	0.000450688	OG0013033
AT5G16330	Trichoblast1	Novel	0.000388306	OG0006212
AT1G08090	Trichoblast1	Novel	0.000348428	OG0001776
AT5G05840	Trichoblast1	Novel	0.000339632	OG0003485
AT1G11920	Trichoblast1	Novel	0.000324972	OG0010944
AT5G16250	Trichoblast1	Novel	0.000311673	OG0000941
AT2G30750	Trichoblast1	Novel	0.000302847	OG0000084
AT2G26760	Trichoblast1	Novel	0.000276667	OG0000840
AT1G63410	Trichoblast1	Novel	0.000268074	OG0000563
AT1G21460	Trichoblast1	Novel	0.0002343	OG0005650
AT5G23990	Trichoblast1	Novel	0.000203182	OG0000865
AT1G52100	Trichoblast1	Novel	0.000192684	OG0000083
AT5G48740	Trichoblast1	Novel	0.000176352	OG0018636
AT1G20180	Trichoblast1	Novel	0.000174557	OG0011100
AT1G24020	Trichoblast1	Novel	0.000131638	OG0011078
AT2G48075	Trichoblast1	Novel	9.22649e-05	OG0018206
AT2G34010	Trichoblast1	Novel	7.41015e-05	OG0017882
AT1G06225	Trichoblast1	Novel	5.37577e-05	OG0014699
AT5G55270	Trichoblast1	Novel	3.18108e-05	OG0000080
AT1G58270	Trichoblast2	Novel	0.00968645	OG0000112
AT5G17820	Trichoblast2	Novel	0.0079964	OG0003025
AT4G01480	Trichoblast2	Novel	0.00734735	OG0000287
AT4G22214	Trichoblast2	Novel	0.00623197	OG0006544
AT3G28550	Trichoblast2	Novel	0.00621685	OG0010768
AT3G19390	Trichoblast2	Novel	0.00617354	OG0014880
AT2G01540	Trichoblast2	Novel	0.00612552	OG0017683
AT1G27740	Trichoblast2	Novel	0.00608283	OG0004151
AT5G54490	Trichoblast2	Novel	0.00595843	OG0000430
AT1G23750	Trichoblast2	Novel	0.00593891	OG0005531
AT2G34910	Trichoblast2	Novel	0.00576142	OG0003155
AT3G61560	Trichoblast2	Novel	0.0053646	OG0000609
AT2G04170	Trichoblast2	Novel	0.00534624	OG0000112
AT4G33467	Trichoblast2	Novel	0.00532908	OG0009325
AT1G66270	Trichoblast2	Novel	0.00529023	OG0001305
AT5G15230	Trichoblast2	Novel	0.00525793	OG0000370
AT5G40510	Trichoblast2	Novel	0.0052504	OG0011730
AT4G30460	Trichoblast2	Novel	0.00523807	OG0006629
AT1G75750	Trichoblast2	Novel	0.00514285	OG0014615
AT2G24260	Trichoblast2	Novel	0.00501907	OG0004515
AT4G39675	Trichoblast2	Novel	0.00497112	OG0014766
AT4G09990	Trichoblast2	Novel	0.00487484	OG0001292
AT3G16460	Trichoblast2	Novel	0.00457697	OG0000083
AT4G15610	Trichoblast2	Novel	0.00456837	OG0006439
AT4G01700	Trichoblast2	Novel	0.0045611	OG0005713
AT3G06300	Trichoblast2	Novel	0.00454147	OG0006430
AT4G37070	Trichoblast2	Novel	0.00452882	OG0015037
AT5G58010	Trichoblast2	Novel	0.00446859	OG0009407
AT1G63220	Trichoblast2	Novel	0.00446664	OG0004063
AT1G25400	Trichoblast2	Novel	0.00440302	OG0011039
AT5G47450	Trichoblast2	Novel	0.00436608	OG0000929
AT3G48340	Trichoblast2	Novel	0.00435075	OG0000926
AT3G47340	Trichoblast2	Novel	0.00434272	OG0001939
AT4G34580	Trichoblast2	Novel	0.00433523	OG0001117
AT3G07880	Trichoblast2	Novel	0.00432268	OG0001407
AT1G04280	Trichoblast2	Novel	0.00430004	OG0001033
AT1G35670	Trichoblast2	Novel	0.00429865	OG0001368
AT5G41080	Trichoblast2	Novel	0.00429521	OG0006447
AT2G47540	Trichoblast2	Novel	0.00425385	OG0005647
AT3G16390	Trichoblast2	Novel	0.00421164	OG0005837
AT2G41970	Trichoblast2	Novel	0.00420401	OG0003307
AT2G38790	Trichoblast2	Novel	0.00416346	OG0014781
AT2G20670	Trichoblast2	Novel	0.0041164	OG0003242
AT2G47650	Trichoblast2	Novel	0.004065	OG0000515
AT2G43820	Trichoblast2	Novel	0.00398996	OG0000331
AT2G32380	Trichoblast2	Novel	0.00396624	OG0002327
AT4G17100	Trichoblast2	Novel	0.00395882	OG0002054
AT3G22570	Trichoblast2	Novel	0.00391369	OG0000426
AT5G16510	Trichoblast2	Novel	0.0038699	OG0006767
AT4G34131	Trichoblast2	Novel	0.00383053	OG0003306
AT3G23190	Trichoblast2	Novel	0.0038197	OG0018332
AT5G11440	Trichoblast2	Novel	0.00378813	OG0015160
AT5G26280	Trichoblast2	Novel	0.00377839	OG0000112
AT5G39320	Trichoblast2	Novel	0.00372471	OG0000569
AT1G53920	Trichoblast2	Novel	0.00369391	OG0017763
AT2G34500	Trichoblast2	Novel	0.00368575	OG0001887
AT2G31350	Trichoblast2	Novel	0.00367041	OG0005764
AT4G24026	Trichoblast2	Novel	0.00365772	OG0002740
AT5G65690	Trichoblast2	Novel	0.00360966	OG0004927
AT5G14470	Trichoblast2	Novel	0.00351968	OG0008876
AT3G03250	Trichoblast2	Novel	0.00345592	OG0003418
AT2G29750	Trichoblast2	Novel	0.00344688	OG0001026
AT3G01280	Trichoblast2	Novel	0.0034211	OG0004718
AT4G00460	Trichoblast2	Novel	0.0034148	OG0007857
AT3G05170	Trichoblast2	Novel	0.00338877	OG0004125
AT1G14220	Trichoblast2	Novel	0.00336728	OG0004104
AT1G56550	Trichoblast2	Novel	0.00336555	OG0003018
AT4G39670	Trichoblast2	Novel	0.00334719	OG0012507
AT5G65390	Trichoblast2	Novel	0.00332119	OG0011617
AT2G35730	Trichoblast2	Novel	0.00331066	OG0008426
AT1G19360	Trichoblast2	Novel	0.00330591	OG0002205
AT3G03640	Trichoblast2	Novel	0.00325859	OG0001305
AT3G21180	Trichoblast2	Novel	0.0032554	OG0001526
AT1G27140	Trichoblast2	Novel	0.00324387	OG0010699
AT1G14170	Trichoblast2	Novel	0.00322186	OG0018037
AT5G20150	Trichoblast2	Novel	0.00321196	OG0005952
AT1G48930	Trichoblast2	Novel	0.00317865	OG0011073
AT3G60330	Trichoblast2	Novel	0.00315668	OG0000087
AT3G56930	Trichoblast2	Novel	0.00314945	OG0003258
AT3G24670	Trichoblast2	Novel	0.00314828	OG0000589
AT1G66470	Trichoblast2	Novel	0.00314781	OG0007936
AT3G20410	Trichoblast2	Novel	0.00313212	OG0000362
AT1G65610	Trichoblast2	Novel	0.00312441	OG0007424
AT2G17660	Trichoblast2	Novel	0.00311802	OG0018117
AT3G46080	Trichoblast2	Novel	0.0031167	OG0006077
AT3G23030	Trichoblast2	Novel	0.00311294	OG0000837
AT2G24610	Trichoblast2	Novel	0.0031075	OG0004542
AT4G09570	Trichoblast2	Novel	0.00302333	OG0001368
AT1G73860	Trichoblast2	Novel	0.00299408	OG0000831
AT1G21360	Trichoblast2	Novel	0.00290768	OG0007475
AT2G32270	Trichoblast2	Novel	0.00290294	OG0001371
AT1G12740	Trichoblast2	Novel	0.00286248	OG0001841
AT2G04100	Trichoblast2	Novel	0.00285491	OG0006067
AT1G54030	Trichoblast2	Novel	0.00283365	OG0005544
AT5G09430	Trichoblast2	Novel	0.00282253	OG0001795
AT5G50460	Trichoblast2	Novel	0.00280681	OG0002002
AT2G45750	Trichoblast2	Novel	0.00279277	OG0002403
AT5G67480	Trichoblast2	Novel	0.0027834	OG0015032
AT3G62120	Trichoblast2	Novel	0.00276731	OG0004674
AT5G40860	Trichoblast2	Novel	0.00273906	OG0004812
AT5G20250	Trichoblast2	Novel	0.00272359	OG0013297
AT1G70460	Trichoblast2	Novel	0.00272319	OG0000825
AT3G04060	Trichoblast2	Novel	0.00270041	OG0000378
AT3G52290	Trichoblast2	Novel	0.00269279	OG0001162
AT3G17780	Trichoblast2	Novel	0.00267054	OG0007975
AT2G29740	Trichoblast2	Novel	0.00262913	OG0001026
AT5G13990	Trichoblast2	Novel	0.00262558	OG0001577
AT4G01350	Trichoblast2	Novel	0.00262251	OG0000034
AT3G07680	Trichoblast2	Novel	0.00262193	OG0003442
AT2G37540	Trichoblast2	Novel	0.0025971	OG0000262
AT1G61795	Trichoblast2	Novel	0.00255019	OG0000330
AT1G30850	Trichoblast2	Novel	0.00254926	OG0003155
AT3G02040	Trichoblast2	Novel	0.00254906	OG0006447
AT3G16450	Trichoblast2	Novel	0.00254853	OG0000083
AT3G56400	Trichoblast2	Novel	0.00254452	OG0011465
AT5G07080	Trichoblast2	Novel	0.00253854	OG0011312
AT5G26010	Trichoblast2	Novel	0.00253349	OG0000958
AT1G17147	Trichoblast2	Novel	0.00253346	OG0000727
AT4G29180	Trichoblast2	Novel	0.00252997	OG0000042
AT5G39740	Trichoblast2	Novel	0.00251521	OG0002658
AT1G72730	Trichoblast2	Novel	0.00250212	OG0000699
AT2G17880	Trichoblast2	Novel	0.00249284	OG0001123
AT3G56210	Trichoblast2	Novel	0.00249029	OG0008966
AT3G19615	Trichoblast2	Novel	0.00246021	OG0015024
AT1G54290	Trichoblast2	Novel	0.00245392	OG0000565
AT4G22217	Trichoblast2	Novel	0.0024336	OG0006544
AT2G47520	Trichoblast2	Novel	0.00239881	OG0005958
AT5G06800	Trichoblast2	Novel	0.00239784	OG0013001
AT5G43620	Trichoblast2	Novel	0.00237934	OG0017946
AT3G22750	Trichoblast2	Novel	0.00237863	OG0006434
AT1G30730	Trichoblast2	Novel	0.00236876	OG0007893
AT5G17390	Trichoblast2	Novel	0.00233292	OG0018226
AT2G39990	Trichoblast2	Novel	0.00232586	OG0008246
AT5G22920	Trichoblast2	Novel	0.0023164	OG0001230
AT1G16000	Trichoblast2	Novel	0.0023103	OG0004010
AT5G56360	Trichoblast2	Novel	0.00230012	OG0002059
AT1G52750	Trichoblast2	Novel	0.0022964	OG0004088
AT4G19680	Trichoblast2	Novel	0.00229571	OG0001744
AT1G04430	Trichoblast2	Novel	0.00229415	OG0001710
AT2G18690	Trichoblast2	Novel	0.00226978	OG0008191
AT5G45630	Trichoblast2	Novel	0.00224571	OG0004028
AT2G41730	Trichoblast2	Novel	0.00224289	OG0014797
AT2G25110	Trichoblast2	Novel	0.00222067	OG0005940
AT1G05210	Trichoblast2	Novel	0.00218881	OG0002327
AT2G44290	Trichoblast2	Novel	0.00217025	OG0003385
AT4G39160	Trichoblast2	Novel	0.00216538	OG0009343
AT1G53680	Trichoblast2	Novel	0.00214191	OG0000158
AT3G51540	Trichoblast2	Novel	0.00213381	OG0014900
AT5G02502	Trichoblast2	Novel	0.002118	OG0006521
AT4G05330	Trichoblast2	Novel	0.00211514	OG0006561
AT3G25250	Trichoblast2	Novel	0.00210192	OG0004817
AT5G65930	Trichoblast2	Novel	0.00205352	OG0009886
AT2G39960	Trichoblast2	Novel	0.00203415	OG0002515
AT5G27490	Trichoblast2	Novel	0.0020311	OG0006238
AT3G43960	Trichoblast2	Novel	0.0020156	OG0014880
AT2G39980	Trichoblast2	Novel	0.00201289	OG0001460
AT4G23010	Trichoblast2	Novel	0.00198877	OG0003971
AT2G19060	Trichoblast2	Novel	0.0019878	OG0011469
AT2G29620	Trichoblast2	Novel	0.00197975	OG0010610
AT4G12330	Trichoblast2	Novel	0.00197592	OG0000163
AT5G24310	Trichoblast2	Novel	0.00197487	OG0003428
AT3G16690	Trichoblast2	Novel	0.00197449	OG0002617
AT1G33090	Trichoblast2	Novel	0.00196205	OG0000588
AT2G03510	Trichoblast2	Novel	0.00195951	OG0006013
AT4G30560	Trichoblast2	Novel	0.00195064	OG0001287
AT3G57290	Trichoblast2	Novel	0.00193533	OG0004819
AT5G20890	Trichoblast2	Novel	0.00192891	OG0009545
AT5G67390	Trichoblast2	Novel	0.00191733	OG0002102
AT5G47740	Trichoblast2	Novel	0.0019112	OG0005146
AT4G34750	Trichoblast2	Novel	0.00189789	OG0001780
AT1G30650	Trichoblast2	Novel	0.00188937	OG0002387
AT2G37820	Trichoblast2	Novel	0.0018757	OG0001141
AT3G19553	Trichoblast2	Novel	0.00185837	OG0011959
AT2G47550	Trichoblast2	Novel	0.0018563	OG0001725
AT2G44380	Trichoblast2	Novel	0.00185414	OG0003273
AT4G24310	Trichoblast2	Novel	0.00183682	OG0008765
AT5G01280	Trichoblast2	Novel	0.00182658	OG0001871
AT5G49270	Trichoblast2	Novel	0.00179641	OG0002683
AT3G26440	Trichoblast2	Novel	0.00179226	OG0017744
AT1G12880	Trichoblast2	Novel	0.00178349	OG0004007
AT5G06230	Trichoblast2	Novel	0.0017556	OG0014947
AT3G04120	Trichoblast2	Novel	0.00175042	OG0001373
AT5G65090	Trichoblast2	Novel	0.00173726	OG0009757
AT2G24170	Trichoblast2	Novel	0.00172722	OG0000253
AT2G33840	Trichoblast2	Novel	0.00170385	OG0005745
AT5G61650	Trichoblast2	Novel	0.0017021	OG0005947
AT5G24980	Trichoblast2	Novel	0.00170196	OG0006799
AT1G74000	Trichoblast2	Novel	0.00169411	OG0014701
AT1G08990	Trichoblast2	Novel	0.00167897	OG0010822
AT5G55400	Trichoblast2	Novel	0.00166919	OG0018490
AT4G00090	Trichoblast2	Novel	0.00166902	OG0012263
AT1G67070	Trichoblast2	Novel	0.00165636	OG0003208
AT1G50930	Trichoblast2	Novel	0.00164281	OG0002206
AT3G21340	Trichoblast2	Novel	0.00163523	OG0000042
AT4G31470	Trichoblast2	Novel	0.00161923	OG0018494
AT3G12540	Trichoblast2	Novel	0.00160101	OG0006103
AT3G52760	Trichoblast2	Novel	0.00158428	OG0003392
AT5G06990	Trichoblast2	Novel	0.00156825	OG0012906
AT4G22758	Trichoblast2	Novel	0.0015654	OG0009335
AT5G11280	Trichoblast2	Novel	0.0015479	OG0006794
AT4G23690	Xylem	Novel	0.0114297	OG0001069
AT3G18280	Xylem	Novel	0.0105587	OG0001811
AT1G68810	Xylem	Novel	0.00967138	OG0005437
AT1G14890	Xylem	Novel	0.0078355	OG0014444
AT5G59290	Xylem	Novel	0.00751435	OG0001906
AT3G51030	Xylem	Novel	0.00748046	OG0006220
AT4G36160	Xylem	Novel	0.0073415	OG0000146
AT3G51670	Xylem	Novel	0.00689397	OG0006233
AT1G55210	Xylem	Novel	0.00667321	OG0007716
AT5G02640	Xylem	Novel	0.00659408	OG0009507
AT5G19530	Xylem	Novel	0.0065607	OG0015159
AT4G35350	Xylem	Novel	0.00643542	OG0001727
AT1G13930	Xylem	Novel	0.00634775	OG0005632
AT4G23670	Xylem	Novel	0.00621028	OG0000678
AT4G15910	Xylem	Novel	0.00617487	OG0012473
AT2G37750	Xylem	Novel	0.00602977	OG0002470
AT5G18310	Xylem	Novel	0.00589722	OG0004410
AT4G28140	Xylem	Novel	0.00581546	OG0002472
AT2G39400	Xylem	Novel	0.00558776	OG0004419
AT5G08370	Xylem	Novel	0.00555282	OG0000968
AT3G54260	Xylem	Novel	0.00554912	OG0018363
AT3G25710	Xylem	Novel	0.00548983	OG0005437
AT4G08685	Xylem	Novel	0.00529175	OG0002320
AT2G42570	Xylem	Novel	0.00522446	OG0001348
AT2G15830	Xylem	Novel	0.00522329	OG0010614
AT5G44020	Xylem	Novel	0.00514947	OG0014670
AT3G21270	Xylem	Novel	0.00501604	OG0000571
AT5G03170	Xylem	Novel	0.00496935	OG0003708
AT5G66920	Xylem	Novel	0.00484574	OG0009381
AT5G14180	Xylem	Novel	0.00479595	OG0002111
AT5G15490	Xylem	Novel	0.00476534	OG0000569
AT4G09890	Xylem	Novel	0.00471305	OG0008998
AT5G66300	Xylem	Novel	0.00466005	OG0000146
AT1G28400	Xylem	Novel	0.0045216	OG0014679
AT1G52150	Xylem	Novel	0.00451638	OG0014715
AT2G18210	Xylem	Novel	0.00450951	OG0008168
AT1G12780	Xylem	Novel	0.00450874	OG0005443
AT4G23680	Xylem	Novel	0.00450848	OG0000678
AT2G35760	Xylem	Novel	0.00449282	OG0011628
AT1G71695	Xylem	Novel	0.00429654	OG0004296
AT1G20850	Xylem	Novel	0.00426439	OG0001727
AT5G60490	Xylem	Novel	0.00424897	OG0003708
AT4G12880	Xylem	Novel	0.00424665	OG0005920
AT4G33120	Xylem	Novel	0.00423891	OG0002749
AT2G22122	Xylem	Novel	0.00422407	OG0014766
AT3G27200	Xylem	Novel	0.00417843	OG0012157
AT4G18640	Xylem	Novel	0.00413249	OG0002046
AT2G04780	Xylem	Novel	0.00406478	OG0004504
AT2G41130	Xylem	Novel	0.00402064	OG0008085
AT1G75280	Xylem	Novel	0.00400923	OG0000581
AT5G53830	Xylem	Novel	0.003953	OG0001398
AT1G33470	Xylem	Novel	0.00392024	OG0007845
AT5G62770	Xylem	Novel	0.00383188	OG0000630
AT3G54820	Xylem	Novel	0.00383013	OG0000292
AT5G63160	Xylem	Novel	0.0037462	OG0004738
AT3G57030	Xylem	Novel	0.0036219	OG0000495
AT3G44870	Xylem	Novel	0.00354526	OG0001818
AT4G37300	Xylem	Novel	0.00353011	OG0004856
AT1G23800	Xylem	Novel	0.00350344	OG0002279
AT2G45450	Xylem	Novel	0.00350298	OG0003293
AT1G25275	Xylem	Novel	0.00348554	OG0011246
AT2G38090	Xylem	Novel	0.00342585	OG0001124
AT5G12870	Xylem	Novel	0.00340906	OG0009597
AT2G28315	Xylem	Novel	0.00340834	OG0008357
AT5G50950	Xylem	Novel	0.00334587	OG0008193
AT2G04850	Xylem	Novel	0.0033432	OG0011478
AT1G33590	Xylem	Novel	0.00333007	OG0003075
AT2G19810	Xylem	Novel	0.00332687	OG0000512
AT3G47400	Xylem	Novel	0.00331941	OG0008693
AT4G29100	Xylem	Novel	0.00325894	OG0001457
AT2G21540	Xylem	Novel	0.00325312	OG0001117
AT1G24600	Xylem	Novel	0.00312493	OG0007703
AT1G48000	Xylem	Novel	0.00310124	OG0000478
AT5G56460	Xylem	Novel	0.00309484	OG0012703
AT3G12955	Xylem	Novel	0.00308343	OG0015014
AT3G17660	Xylem	Novel	0.00308221	OG0018264
AT2G03090	Xylem	Novel	0.00305669	OG0000736
AT1G47410	Xylem	Novel	0.00301121	OG0010979
AT5G64570	Xylem	Novel	0.00300442	OG0006921
AT3G10080	Xylem	Novel	0.00300151	OG0011922
AT4G24780	Xylem	Novel	0.00298279	OG0000589
AT2G37180	Xylem	Novel	0.0029771	OG0000292
AT1G53163	Xylem	Novel	0.00295948	OG0014720
AT5G50450	Xylem	Novel	0.00295077	OG0001738
AT1G22740	Xylem	Novel	0.00291827	OG0004068
AT1G28110	Xylem	Novel	0.0029161	OG0001747
AT3G59680	Xylem	Novel	0.00288573	OG0006509
AT1G78020	Xylem	Novel	0.00287202	OG0005601
AT2G33990	Xylem	Novel	0.00286752	OG0002549
AT1G62981	Xylem	Novel	0.00284378	OG0005856
AT1G56600	Xylem	Novel	0.00282919	OG0014484
AT2G38530	Xylem	Novel	0.00281937	OG0000088
AT5G16490	Xylem	Novel	0.00281717	OG0018628
AT3G02550	Xylem	Novel	0.00278098	OG0002413
AT1G68795	Xylem	Novel	0.00277073	OG0004017
AT1G10480	Xylem	Novel	0.00273811	OG0014626
AT5G17420	Xylem	Novel	0.00273174	OG0009397
AT1G74660	Xylem	Novel	0.00270363	OG0000845
AT3G11170	Xylem	Novel	0.00261786	OG0002632
AT1G02640	Xylem	Novel	0.00260078	OG0004276
[truncated: 100 more rows]

## Sheet: Maize_Seurat
Marker_Genes	Orthogroup	Clusters	Values
Zm00001d017508	OG0000499	Cortex	2.06405
Zm00001d047117	OG0001267	Cortex	1.9604
Zm00001d018704	OG0022599	Cortex	1.93756
Zm00001d026163	OG0000499	Cortex	1.92558
Zm00001d029859	OG0007222	Cortex	1.92015
Zm00001d026162	OG0000499	Cortex	1.92
Zm00001d047114	OG0001267	Cortex	1.81388
Zm00001d022457	OG0021112	Cortex	1.72743
Zm00001d019163	OG0011969	Cortex	1.53754
Zm00001d020958	OG0014254	Cortex	1.50254
Zm00001d021168	OG0000331	Cortex	1.49935
Zm00001d043047	OG0000736	Cortex	1.43915
Zm00001d048723	OG0007077	Cortex	1.42815
Zm00001d034382	OG0022848	Cortex	1.37972
Zm00001d044762	OG0000985	Cortex	1.37738
Zm00001d051934	OG0000028	Cortex	1.37339
Zm00001d037637	OG0000842	Cortex	1.3252
Zm00001d028750	OG0001939	Cortex	1.31318
Zm00001d026177	OG0000929	Cortex	1.31037
Zm00001d042541	OG0023167	Cortex	1.30434
Zm00001d047113	OG0001267	Cortex	1.30071
Zm00001d052254	OG0005213	Cortex	1.29781
Zm00001d033855	OG0011590	Cortex	1.29167
Zm00001d051362	OG0000929	Cortex	1.28827
Zm00001d042540	OG0023167	Cortex	1.27957
Zm00001d036234	OG0003732	Cortex	1.27595
Zm00001d030199	OG0014013	Cortex	1.26796
Zm00001d033457	OG0000101	Cortex	1.26392
Zm00001d010632	OG0000375	Cortex	1.23258
Zm00001d052518	OG0009781	Cortex	1.22107
Zm00001d041173	OG0003948	Cortex	1.18934
Zm00001d003283	OG0010138	Cortex	1.17317
Zm00001d002564	OG0012531	Cortex	1.17069
Zm00001d046186	OG0020794	Cortex	1.15838
Zm00001d028721	OG0001073	Cortex	1.15516
Zm00001d044677	OG0017003	Cortex	1.143
Zm00001d022458	OG0002882	Cortex	1.14193
Zm00001d015852	OG0004760	Cortex	1.13303
Zm00001d012456	OG0000888	Cortex	1.12864
Zm00001d031727	OG0009684	Cortex	1.12815
Zm00001d010007	OG0015347	Cortex	1.12788
Zm00001d027619	OG0006483	Cortex	1.12449
Zm00001d028744	OG0015946	Cortex	1.11069
Zm00001d019560	OG0022597	Cortex	1.11029
Zm00001d019565	OG0000292	Cortex	1.10266
Zm00001d023680	OG0021865	Cortex	1.09623
Zm00001d028164	OG0004156	Cortex	1.09411
Zm00001d028230	OG0012819	Cortex	1.09352
Zm00001d008548	OG0015315	Cortex	1.0882
Zm00001d017288	OG0000292	Cortex	1.06906
Zm00001d002690	OG0000416	Cortex	1.06059
Zm00001d005001	OG0000965	Cortex	1.06056
Zm00001d008210	OG0001289	Cortex	1.05686
Zm00001d044037	OG0001348	Cortex	1.0416
Zm00001d012957	OG0001441	Cortex	1.03434
Zm00001d039764	OG0003297	Cortex	1.0294
Zm00001d004921	OG0000028	Cortex	1.02884
Zm00001d021647	OG0001091	Cortex	1.02767
Zm00001d048348	OG0015216	Cortex	1.02548
Zm00001d015138	OG0013259	Cortex	1.02176
Zm00001d037733	OG0002542	Cortex	1.01169
Zm00001d043174	OG0002463	Cortex	1.01161
Zm00001d033024	OG0006119	Cortex	1.00873
Zm00001d017526	OG0000416	Cortex	1.00057
Zm00001d022277	OG0009060	Cortex	0.996913
Zm00001d038521	OG0000484	Cortex	0.99277
Zm00001d026572	OG0001838	Cortex	0.984119
Zm00001d025903	OG0001691	Cortex	0.974464
Zm00001d046824	OG0011575	Cortex	0.969062
Zm00001d026334	OG0001911	Cortex	0.967418
Zm00001d018031	OG0019669	Cortex	0.966903
Zm00001d021653	OG0001067	Cortex	0.964896
Zm00001d017375	OG0001569	Cortex	0.959921
Zm00001d037969	OG0000106	Cortex	0.959243
Zm00001d053715	OG0000937	Cortex	0.954442
Zm00001d047089	OG0002892	Cortex	0.952191
Zm00001d011477	OG0019083	Cortex	0.947927
Zm00001d024587	OG0001404	Cortex	0.947006
Zm00001d048136	OG0003781	Cortex	0.94531
Zm00001d047674	OG0003656	Cortex	0.935087
Zm00001d002630	OG0004899	Cortex	0.932185
Zm00001d035646	OG0020408	Cortex	0.931976
Zm00001d014757	OG0000480	Cortex	0.931737
Zm00001d050893	OG0013536	Cortex	0.928051
Zm00001d003311	OG0002344	Cortex	0.916482
Zm00001d002266	OG0001911	Cortex	0.912002
Zm00001d013809	OG0001184	Cortex	0.910653
Zm00001d034107	OG0000796	Cortex	0.90945
Zm00001d027652	OG0008321	Cortex	0.90738
Zm00001d025753	OG0001138	Cortex	0.904558
Zm00001d051798	OG0007703	Cortex	0.90283
Zm00001d039715	OG0023165	Cortex	0.902518
Zm00001d032324	OG0000407	Cortex	0.899149
Zm00001d011041	OG0004536	Cortex	0.898281
Zm00001d025727	OG0016218	Cortex	0.889224
Zm00001d044426	OG0019049	Cortex	0.882534
Zm00001d020402	OG0022654	Cortex	0.88081
Zm00001d044153	OG0015462	Cortex	0.879436
Zm00001d051799	OG0001299	Cortex	0.877455
Zm00001d052390	OG0022799	Cortex	0.877021
Zm00001d027991	OG0013595	Cortex	0.87664
Zm00001d005039	OG0004678	Cortex	0.875422
Zm00001d011486	OG0000866	Cortex	0.86577
Zm00001d010385	OG0015619	Cortex	0.865615
Zm00001d016151	OG0001232	Cortex	0.861371
Zm00001d047330	OG0000325	Cortex	0.859958
Zm00001d011720	OG0011671	Cortex	0.858476
Zm00001d039941	OG0015318	Cortex	0.856932
Zm00001d047492	OG0015959	Cortex	0.853333
Zm00001d025654	OG0000162	Cortex	0.85304
Zm00001d021299	OG0008462	Cortex	0.84956
Zm00001d012968	OG0016100	Cortex	0.849161
Zm00001d035603	OG0004536	Cortex	0.846345
Zm00001d018809	OG0000158	Cortex	0.845436
Zm00001d002326	OG0001558	Cortex	0.844036
Zm00001d038523	OG0000375	Cortex	0.842818
Zm00001d053195	OG0001421	Cortex	0.842438
Zm00001d011735	OG0006883	Cortex	0.842424
Zm00001d043087	OG0000618	Cortex	0.841915
Zm00001d024772	OG0022716	Cortex	0.840896
Zm00001d006034	OG0022611	Cortex	0.839871
Zm00001d034037	OG0000202	Cortex	0.838566
Zm00001d010912	OG0022716	Cortex	0.837769
Zm00001d012081	OG0023150	Cortex	0.835823
Zm00001d048789	OG0017591	Cortex	0.833383
Zm00001d048135	OG0003781	Cortex	0.832188
Zm00001d051977	OG0009694	Cortex	0.831564
Zm00001d003414	OG0000378	Cortex	0.828962
Zm00001d035475	OG0008868	Cortex	0.825159
Zm00001d035553	OG0013773	Cortex	0.824689
Zm00001d034387	OG0000392	Cortex	0.8219
Zm00001d038841	OG0012894	Cortex	0.818843
Zm00001d045088	OG0008248	Cortex	0.815782
Zm00001d020556	OG0009050	Cortex	0.815557
Zm00001d002261	OG0000767	Cortex	0.815107
Zm00001d042449	OG0015586	Cortex	0.810984
Zm00001d021579	OG0003517	Cortex	0.810532
Zm00001d031267	OG0009840	Cortex	0.806945
Zm00001d051554	OG0004958	Cortex	0.806496
Zm00001d044056	OG0008210	Cortex	0.806244
Zm00001d003751	OG0016180	Cortex	0.804195
Zm00001d010540	OG0009986	Cortex	0.803269
Zm00001d051005	OG0019564	Cortex	0.800754
Zm00001d005391	OG0017468	Cortex	0.799052
Zm00001d043741	OG0000451	Cortex	0.798989
Zm00001d034940	OG0001091	Cortex	0.798666
Zm00001d046184	OG0002837	Cortex	0.792327
Zm00001d005978	OG0001900	Cortex	0.791909
Zm00001d013409	OG0013661	Cortex	0.790501
Zm00001d035753	OG0001168	Cortex	0.789528
Zm00001d028064	OG0003781	Cortex	0.78816
Zm00001d036961	OG0002229	Cortex	0.786892
Zm00001d019060	OG0016573	Cortex	0.784939
Zm00001d032461	OG0012468	Cortex	0.784362
Zm00001d031705	OG0012823	Cortex	0.783789
Zm00001d021935	OG0006369	Cortex	0.781353
Zm00001d039098	OG0008471	Cortex	0.779235
Zm00001d026341	OG0016272	Cortex	0.779194
Zm00001d043156	OG0019203	Cortex	0.770332
Zm00001d042934	OG0007073	Cortex	0.770036
Zm00001d002252	OG0001716	Cortex	0.769306
Zm00001d040004	OG0002413	Cortex	0.767684
Zm00001d047555	OG0004206	Cortex	0.764493
Zm00001d022032	OG0013331	Cortex	0.763604
Zm00001d038221	OG0003979	Cortex	0.761366
Zm00001d029366	OG0001753	Cortex	0.761089
Zm00001d048558	OG0010308	Cortex	0.760118
Zm00001d006211	OG0003645	Cortex	0.76
Zm00001d020639	OG0002290	Cortex	0.758157
Zm00001d023994	OG0003948	Cortex	0.758151
Zm00001d024995	OG0014296	Cortex	0.757425
Zm00001d013830	OG0000141	Cortex	0.756476
Zm00001d044747	OG0003472	Cortex	0.755871
Zm00001d012194	OG0001853	Cortex	0.753903
Zm00001d021506	OG0013117	Cortex	0.75134
Zm00001d052192	OG0015810	Cortex	0.748636
Zm00001d020614	OG0016813	Cortex	0.743171
Zm00001d047116	OG0001267	Cortex	0.743089
Zm00001d052375	OG0014043	Cortex	0.74245
Zm00001d018811	OG0001383	Cortex	0.741607
Zm00001d032950	OG0005074	Cortex	0.741408
Zm00001d002415	OG0016259	Cortex	0.739994
Zm00001d002402	OG0003256	Cortex	0.739889
Zm00001d007714	OG0011020	Cortex	0.738639
Zm00001d042574	OG0001853	Cortex	0.737834
Zm00001d048667	OG0000789	Cortex	0.737575
Zm00001d022017	OG0000568	Cortex	0.735347
Zm00001d022228	OG0021090	Cortex	0.734642
Zm00001d046226	OG0006535	Cortex	0.730929
Zm00001d051384	OG0000499	Cortex	0.730556
Zm00001d021119	OG0007228	Cortex	0.726524
Zm00001d046510	OG0001392	Cortex	0.725695
Zm00001d025296	OG0004007	Cortex	0.724693
Zm00001d010175	OG0001421	Cortex	0.7238
Zm00001d045269	OG0004745	Cortex	0.720586
Zm00001d010662	OG0013248	Cortex	0.719849
Zm00001d033389	OG0001448	Cortex	0.719805
Zm00001d027546	OG0001221	Cortex	0.719609
Zm00001d018627	OG0004107	Cortex	0.718493
Zm00001d027987	OG0004220	Cortex	0.718116
Zm00001d000017	OG0017672	Stele1	1.44676
Zm00001d000018	OG0017672	Stele1	1.42397
Zm00001d026406	OG0016277	Stele1	1.35552
Zm00001d034514	OG0002221	Stele1	1.34429
Zm00001d029397	OG0000586	Stele1	1.28178
Zm00001d000012	OG0017672	Stele1	1.28176
Zm00001d002673	OG0016245	Stele1	1.27301
Zm00001d016760	OG0000532	Stele1	1.20028
Zm00001d017279	OG0019579	Stele1	1.19996
Zm00001d032947	OG0005272	Stele1	1.1914
Zm00001d003877	OG0002320	Stele1	1.16823
Zm00001d016471	OG0013523	Stele1	1.1666
Zm00001d010218	OG0021488	Stele1	1.15906
Zm00001d037194	OG0001379	Stele1	1.15629
Zm00001d024752	OG0001264	Stele1	1.15586
Zm00001d031223	OG0001226	Stele1	1.1527
Zm00001d004250	OG0020194	Stele1	1.14843
Zm00001d036370	OG0000179	Stele1	1.14682
Zm00001d027948	OG0015889	Stele1	1.14585
Zm00001d006526	OG0013918	Stele1	1.13167
Zm00001d028816	OG0001258	Stele1	1.12758
Zm00001d033711	OG0002553	Stele1	1.12209
Zm00001d028693	OG0019875	Stele1	1.1172
Zm00001d008925	OG0009913	Stele1	1.10237
Zm00001d024996	OG0007366	Stele1	1.09792
Zm00001d041430	OG0021910	Stele1	1.07415
Zm00001d052243	OG0002093	Stele1	1.06685
Zm00001d017276	OG0000756	Stele1	1.04895
Zm00001d024281	OG0006896	Stele1	1.04784
Zm00001d038913	OG0001811	Stele1	1.04169
Zm00001d037693	OG0000252	Stele1	1.03143
Zm00001d043596	OG0001469	Stele1	1.03088
Zm00001d002128	OG0000925	Stele1	1.0234
Zm00001d012603	OG0000178	Stele1	1.01239
Zm00001d042337	OG0019275	Stele1	1.01084
Zm00001d009705	OG0017598	Stele1	1.00219
Zm00001d042909	OG0008599	Stele1	0.996721
Zm00001d050899	OG0000250	Stele1	0.996015
Zm00001d031049	OG0002938	Stele1	0.993977
Zm00001d038688	OG0003615	Stele1	0.992919
Zm00001d031779	OG0000719	Stele1	0.992603
Zm00001d021324	OG0016860	Stele1	0.981257
Zm00001d048949	OG0001545	Stele1	0.977209
Zm00001d011841	OG0000871	Stele1	0.977142
Zm00001d002898	OG0013770	Stele1	0.974985
Zm00001d043988	OG0019087	Stele1	0.969691
Zm00001d016625	OG0019504	Stele1	0.96211
Zm00001d017145	OG0004566	Stele1	0.961108
Zm00001d047104	OG0021622	Stele1	0.956069
Zm00001d013862	OG0004894	Stele1	0.954166
Zm00001d029583	OG0015991	Stele1	0.948625
Zm00001d044683	OG0009752	Stele1	0.947198
Zm00001d037759	OG0001857	Stele1	0.943845
Zm00001d032855	OG0021565	Stele1	0.940805
Zm00001d019726	OG0014011	Stele1	0.938768
Zm00001d014804	OG0016540	Stele1	0.936987
Zm00001d042207	OG0007078	Stele1	0.926285
Zm00001d034427	OG0000927	Stele1	0.926155
Zm00001d028814	OG0001258	Stele1	0.925859
Zm00001d009373	OG0015206	Stele1	0.92397
Zm00001d028815	OG0001258	Stele1	0.923304
Zm00001d045888	OG0005984	Stele1	0.920469
Zm00001d010870	OG0022718	Stele1	0.918997
Zm00001d002071	OG0022727	Stele1	0.910373
Zm00001d048611	OG0010085	Stele1	0.904424
Zm00001d027924	OG0000730	Stele1	0.902637
Zm00001d035236	OG0001579	Stele1	0.900854
Zm00001d002479	OG0002870	Stele1	0.900851
Zm00001d028785	OG0015948	Stele1	0.899283
Zm00001d044095	OG0001050	Stele1	0.893096
Zm00001d052653	OG0013153	Stele1	0.892578
Zm00001d004559	OG0000374	Stele1	0.889789
Zm00001d013879	OG0000765	Stele1	0.882808
Zm00001d012277	OG0000071	Stele1	0.882624
Zm00001d038870	OG0009968	Stele1	0.881678
Zm00001d044833	OG0001766	Stele1	0.874846
Zm00001d006069	OG0016840	Stele1	0.87298
Zm00001d033090	OG0015998	Stele1	0.869805
Zm00001d044382	OG0019043	Stele1	0.867055
Zm00001d045565	OG0020650	Stele1	0.865463
Zm00001d050412	OG0021257	Stele1	0.858418
Zm00001d043249	OG0003628	Stele1	0.858361
Zm00001d035157	OG0000498	Stele1	0.854188
Zm00001d022351	OG0021100	Stele1	0.852984
Zm00001d052335	OG0003783	Stele1	0.851238
Zm00001d051251	OG0014347	Stele1	0.848248
Zm00001d002632	OG0016250	Stele1	0.848131
Zm00001d047908	OG0002714	Stele1	0.847274
Zm00001d027949	OG0013442	Stele1	0.842473
Zm00001d013080	OG0000927	Stele1	0.840741
Zm00001d020915	OG0007608	Stele1	0.839892
Zm00001d017240	OG0002082	Stele1	0.837553
Zm00001d047351	OG0003147	Stele1	0.835907
Zm00001d016942	OG0019549	Stele1	0.835477
Zm00001d002069	OG0020370	Stele1	0.834585
Zm00001d021726	OG0000358	Stele1	0.832782
Zm00001d012899	OG0000250	Stele1	0.83177
Zm00001d038451	OG0002541	Stele1	0.828112
Zm00001d021901	OG0000638	Stele1	0.822981
Zm00001d035646	OG0020408	Stele1	0.821963
Zm00001d019228	OG0001371	Stele1	0.821881
Zm00001d003190	OG0001138	Stele1	0.814813
Zm00001d018844	OG0017340	Stele1	0.813906
Zm00001d015012	OG0000293	Stele1	0.811136
Zm00001d007977	OG0000585	Stele1	0.808379
Zm00001d018220	OG0000115	Stele1	0.80342
Zm00001d012900	OG0000250	Stele1	0.802352
Zm00001d049437	OG0000085	Stele1	0.798486
Zm00001d043344	OG0013374	Stele1	0.7953
Zm00001d005888	OG0008994	Stele1	0.793144
Zm00001d043338	OG0019174	Stele1	0.792327
Zm00001d015618	OG0009119	Stele1	0.792082
Zm00001d044771	OG0001713	Stele1	0.790647
Zm00001d017912	OG0002441	Stele1	0.790052
Zm00001d024960	OG0007366	Stele1	0.788827
Zm00001d012929	OG0020094	Stele1	0.787839
Zm00001d018682	OG0000116	Stele1	0.787748
Zm00001d042099	OG0000115	Stele1	0.787327
Zm00001d041716	OG0020681	Stele1	0.787275
Zm00001d032636	OG0000268	Stele1	0.784616
Zm00001d051863	OG0009520	Stele1	0.783709
Zm00001d018064	OG0002093	Stele1	0.776735
Zm00001d006158	OG0003293	Stele1	0.774905
Zm00001d050837	OG0015732	Stele1	0.774001
Zm00001d021816	OG0021045	Stele1	0.772767
Zm00001d016277	OG0002311	Stele1	0.771656
Zm00001d051552	OG0006191	Stele1	0.766958
Zm00001d022607	OG0021463	Stele1	0.76668
Zm00001d005790	OG0021407	Stele1	0.766121
Zm00001d024943	OG0001232	Stele1	0.76235
Zm00001d044272	OG0015442	Stele1	0.761938
Zm00001d028966	OG0008532	Stele1	0.757678
Zm00001d024753	OG0001264	Stele1	0.755424
Zm00001d019725	OG0014011	Stele1	0.75309
Zm00001d020953	OG0002281	Stele1	0.75037
Zm00001d031580	OG0008853	Stele1	0.746877
Zm00001d049260	OG0003441	Stele1	0.746282
Zm00001d020702	OG0021424	Stele1	0.742876
Zm00001d029662	OG0021606	Stele1	0.74173
Zm00001d012322	OG0000796	Stele1	0.738237
Zm00001d019734	OG0021482	Stele1	0.737806
Zm00001d049428	OG0000085	Stele1	0.737792
Zm00001d047765	OG0001237	Stele1	0.736033
Zm00001d045298	OG0001265	Stele1	0.733309
Zm00001d027892	OG0003386	Stele1	0.730345
Zm00001d043238	OG0015526	Stele1	0.726347
Zm00001d035865	OG0002769	Stele1	0.72629
Zm00001d038862	OG0020600	Stele1	0.723302
Zm00001d052247	OG0000925	Stele1	0.722489
Zm00001d019750	OG0003765	Stele1	0.722191
Zm00001d053612	OG0000291	Stele1	0.720344
Zm00001d037035	OG0002785	Stele1	0.72007
Zm00001d032992	OG0011878	Stele1	0.716938
Zm00001d017761	OG0004260	Stele1	0.713393
Zm00001d017851	OG0005984	Stele1	0.711021
Zm00001d025887	OG0001291	Stele1	0.709581
Zm00001d045043	OG0005717	Stele1	0.708194
Zm00001d032401	OG0015994	Stele1	0.705728
Zm00001d051015	OG0004566	Stele1	0.704939
Zm00001d043935	OG0000415	Stele1	0.704924
Zm00001d018825	OG0009841	Stele1	0.704318
Zm00001d002847	OG0000205	Stele1	0.703657
Zm00001d038551	OG0023080	Stele1	0.702945
Zm00001d002176	OG0000498	Stele1	0.702691
Zm00001d007080	OG0008078	Stele1	0.701314
Zm00001d039384	OG0001887	Stele1	0.701167
Zm00001d010115	OG0008249	Stele1	0.700763
Zm00001d018969	OG0003538	Stele1	0.699967
Zm00001d005018	OG0000588	Stele1	0.698751
Zm00001d038558	OG0001438	Stele1	0.698433
Zm00001d046004	OG0020767	Stele1	0.697899
Zm00001d004754	OG0005276	Stele1	0.69649
Zm00001d015459	OG0000708	Stele1	0.695358
Zm00001d021977	OG0021058	Stele1	0.693362
Zm00001d045210	OG0022893	Stele1	0.693022
Zm00001d017470	OG0006928	Stele1	0.69143
Zm00001d037656	OG0023085	Stele1	0.690316
Zm00001d044908	OG0001004	Stele1	0.689783
Zm00001d029468	OG0019956	Stele1	0.689712
Zm00001d027341	OG0001916	Stele1	0.688224
Zm00001d035753	OG0001168	Stele1	0.688211
Zm00001d024664	OG0003879	Stele1	0.685857
Zm00001d005504	OG0015182	Stele1	0.685773
Zm00001d028374	OG0000878	Stele1	0.684255
Zm00001d036475	OG0007014	Stele1	0.683232
Zm00001d012274	OG0003728	Stele1	0.682899
Zm00001d027947	OG0013442	Stele1	0.681134
Zm00001d052843	OG0021291	Stele1	0.679082
Zm00001d034372	OG0006317	Stele1	0.678487
Zm00001d021677	OG0013918	Stele1	0.675604
Zm00001d022154	OG0007106	Stele1	0.675289
Zm00001d024702	OG0004865	Stele1	0.675125
Zm00001d021659	OG0002704	Stele1	0.675001
Zm00001d038320	OG0001421	Stele1	0.671575
Zm00001d021949	OG0012669	Stele1	0.670818
Zm00001d010520	OG0002597	Stele1	0.670686
Zm00001d020955	OG0000304	Stele1	0.669694
Zm00001d015401	OG0000682	Stele1	0.667846
Zm00001d043121	OG0010134	Stele1	0.667598
Zm00001d038873	OG0001718	Stele1	0.667331
Zm00001d037194	OG0001379	Phloem	1.68725
Zm00001d040786	OG0000532	Phloem	1.62491
Zm00001d043610	OG0018993	Phloem	1.59443
Zm00001d043344	OG0013374	Phloem	1.48303
Zm00001d040787	OG0000532	Phloem	1.47622
Zm00001d026406	OG0016277	Phloem	1.46377
Zm00001d034836	OG0001705	Phloem	1.41972
Zm00001d033711	OG0002553	Phloem	1.40581
Zm00001d016625	OG0019504	Phloem	1.37995
Zm00001d029397	OG0000586	Phloem	1.3421
Zm00001d016760	OG0000532	Phloem	1.31926
Zm00001d034978	OG0002321	Phloem	1.30947
Zm00001d024386	OG0010249	Phloem	1.28063
Zm00001d010814	OG0020594	Phloem	1.27769
Zm00001d023664	OG0009578	Phloem	1.26105
Zm00001d046157	OG0020790	Phloem	1.24612
Zm00001d009373	OG0015206	Phloem	1.2235
Zm00001d028785	OG0015948	Phloem	1.21339
Zm00001d026297	OG0001354	Phloem	1.1611
Zm00001d038913	OG0001811	Phloem	1.15858
Zm00001d024763	OG0000295	Phloem	1.10745
Zm00001d008312	OG0015376	Phloem	1.10067
Zm00001d019547	OG0006363	Phloem	1.09781
Zm00001d012322	OG0000796	Phloem	1.08655
Zm00001d016705	OG0019513	Phloem	1.08386
Zm00001d028693	OG0019875	Phloem	1.07858
Zm00001d042099	OG0000115	Phloem	1.05977
Zm00001d048611	OG0010085	Phloem	1.05976
Zm00001d009907	OG0005959	Phloem	1.05965
Zm00001d048131	OG0019818	Phloem	1.05408
Zm00001d029662	OG0021606	Phloem	1.04765
Zm00001d013825	OG0019973	Phloem	1.03443
Zm00001d002436	OG0003413	Phloem	1.02746
Zm00001d034270	OG0015254	Phloem	1.02671
Zm00001d015618	OG0009119	Phloem	1.02505
Zm00001d013390	OG0010111	Phloem	1.02019
Zm00001d045565	OG0020650	Phloem	1.0191
Zm00001d003903	OG0015269	Phloem	1.01802
Zm00001d051135	OG0000297	Phloem	1.01656
Zm00001d036475	OG0007014	Phloem	1.01372
Zm00001d036136	OG0002352	Phloem	1.00829
Zm00001d048394	OG0011611	Phloem	1.00676
Zm00001d038065	OG0005885	Phloem	1.00602
Zm00001d002632	OG0016250	Phloem	0.999922
Zm00001d024752	OG0001264	Phloem	0.992667
Zm00001d038558	OG0001438	Phloem	0.991253
Zm00001d037693	OG0000252	Phloem	0.974589
Zm00001d043249	OG0003628	Phloem	0.958701
Zm00001d015509	OG0015245	Phloem	0.954429
Zm00001d050099	OG0021265	Phloem	0.952873
Zm00001d035542	OG0010162	Phloem	0.947783
Zm00001d037677	OG0001811	Phloem	0.946405
Zm00001d025401	OG0000532	Phloem	0.938746
Zm00001d002133	OG0016277	Phloem	0.937716
Zm00001d050011	OG0000719	Phloem	0.937176
Zm00001d038870	OG0009968	Phloem	0.936863
Zm00001d049081	OG0002808	Phloem	0.936367
Zm00001d004602	OG0017521	Phloem	0.927859
Zm00001d000017	OG0017672	Phloem	0.927724
Zm00001d017575	OG0001060	Phloem	0.926589
Zm00001d034427	OG0000927	Phloem	0.924825
Zm00001d031892	OG0003765	Phloem	0.923599
Zm00001d031702	OG0000552	Phloem	0.90762
Zm00001d036338	OG0020890	Phloem	0.907373
Zm00001d044156	OG0000619	Phloem	0.905215
Zm00001d017353	OG0015759	Phloem	0.903189
Zm00001d011734	OG0000861	Phloem	0.902445
Zm00001d010870	OG0022718	Phloem	0.899311
Zm00001d043491	OG0013438	Phloem	0.898303
Zm00001d028167	OG0000774	Phloem	0.894918
Zm00001d033941	OG0020046	Phloem	0.894692
Zm00001d052336	OG0003783	Phloem	0.891403
Zm00001d012378	OG0008348	Phloem	0.891009
Zm00001d031833	OG0004567	Phloem	0.888492
Zm00001d033090	OG0015998	Phloem	0.885054
Zm00001d017386	OG0000907	Phloem	0.882785
Zm00001d045210	OG0022893	Phloem	0.880556
Zm00001d008214	OG0004827	Phloem	0.877019
Zm00001d004467	OG0003201	Phloem	0.87558
Zm00001d009084	OG0001104	Phloem	0.871077
Zm00001d021226	OG0002060	Phloem	0.861092
Zm00001d022262	OG0000895	Phloem	0.860789
Zm00001d029696	OG0001082	Phloem	0.859226
Zm00001d012602	OG0001120	Phloem	0.858337
Zm00001d012674	OG0011004	Phloem	0.857628
Zm00001d019726	OG0014011	Phloem	0.857603
Zm00001d020692	OG0021421	Phloem	0.856177
Zm00001d029965	OG0002729	Phloem	0.854347
Zm00001d043338	OG0019174	Phloem	0.853336
Zm00001d015559	OG0020838	Phloem	0.84762
Zm00001d027892	OG0003386	Phloem	0.844667
Zm00001d031536	OG0003638	Phloem	0.840528
Zm00001d049940	OG0011567	Phloem	0.840371
Zm00001d008392	OG0009311	Phloem	0.838894
Zm00001d029583	OG0015991	Phloem	0.838075
Zm00001d040364	OG0001606	Phloem	0.832557
Zm00001d017276	OG0000756	Phloem	0.831507
Zm00001d022254	OG0011861	Phloem	0.828146
Zm00001d006493	OG0022612	Phloem	0.826717
Zm00001d026154	OG0001041	Phloem	0.825975
Zm00001d008795	OG0005236	Phloem	0.820049
Zm00001d045888	OG0005984	Phloem	0.819622
Zm00001d018621	OG0020901	Phloem	0.819428
Zm00001d031223	OG0001226	Phloem	0.812238
Zm00001d031258	OG0012385	Phloem	0.806952
Zm00001d037759	OG0001857	Phloem	0.806647
Zm00001d033805	OG0000258	Phloem	0.805341
Zm00001d008961	OG0001241	Phloem	0.804026
Zm00001d002069	OG0020370	Phloem	0.802262
Zm00001d017279	OG0019579	Phloem	0.799052
Zm00001d019725	OG0014011	Phloem	0.798776
Zm00001d033714	OG0007488	Phloem	0.798234
Zm00001d007977	OG0000585	Phloem	0.796663
Zm00001d010520	OG0002597	Phloem	0.796057
Zm00001d002257	OG0002453	Phloem	0.790868
Zm00001d016277	OG0002311	Phloem	0.789371
Zm00001d033262	OG0001428	Phloem	0.788135
Zm00001d022430	OG0002032	Phloem	0.787656
Zm00001d028966	OG0008532	Phloem	0.785582
Zm00001d052485	OG0006295	Phloem	0.785037
Zm00001d051251	OG0014347	Phloem	0.784618
Zm00001d005306	OG0001021	Phloem	0.784308
Zm00001d028303	OG0003161	Phloem	0.782386
Zm00001d000018	OG0017672	Phloem	0.779395
Zm00001d024281	OG0006896	Phloem	0.7729
Zm00001d020552	OG0003261	Phloem	0.772557
Zm00001d053952	OG0003721	Phloem	0.772271
Zm00001d002847	OG0000205	Phloem	0.769248
Zm00001d016950	OG0013536	Phloem	0.768677
Zm00001d027976	OG0004343	Phloem	0.768626
Zm00001d002842	OG0000907	Phloem	0.768112
Zm00001d011144	OG0013395	Phloem	0.766553
Zm00001d048616	OG0017038	Phloem	0.765469
Zm00001d009923	OG0016352	Phloem	0.762344
Zm00001d035494	OG0008212	Phloem	0.759396
Zm00001d043988	OG0019087	Phloem	0.757453
Zm00001d045334	OG0023137	Phloem	0.756408
Zm00001d031580	OG0008853	Phloem	0.75611
Zm00001d044382	OG0019043	Phloem	0.755679
Zm00001d016363	OG0009592	Phloem	0.755006
Zm00001d027854	OG0001918	Phloem	0.754503
Zm00001d047275	OG0010891	Phloem	0.754331
Zm00001d024925	OG0008127	Phloem	0.751999
Zm00001d018257	OG0007735	Phloem	0.750884
Zm00001d034514	OG0002221	Phloem	0.750811
Zm00001d031090	OG0001758	Phloem	0.748775
Zm00001d005888	OG0008994	Phloem	0.740698
Zm00001d052040	OG0004032	Phloem	0.740552
Zm00001d020417	OG0000474	Phloem	0.73908
Zm00001d021978	OG0001178	Phloem	0.737221
Zm00001d049008	OG0000395	Phloem	0.737117
Zm00001d035683	OG0000106	Phloem	0.736361
Zm00001d049100	OG0005407	Phloem	0.735387
Zm00001d003614	OG0003780	Phloem	0.734492
Zm00001d020915	OG0007608	Phloem	0.734219
Zm00001d042922	OG0000132	Phloem	0.733697
Zm00001d007045	OG0003416	Phloem	0.733522
Zm00001d011276	OG0000237	Phloem	0.733446
Zm00001d035171	OG0021139	Phloem	0.730775
Zm00001d049405	OG0002453	Phloem	0.726417
Zm00001d032710	OG0011211	Phloem	0.726051
Zm00001d038862	OG0020600	Phloem	0.725607
Zm00001d001883	OG0002959	Phloem	0.72506
Zm00001d051439	OG0001060	Phloem	0.71989
Zm00001d042042	OG0019309	Phloem	0.718397
Zm00001d015401	OG0000682	Phloem	0.716867
Zm00001d038764	OG0010448	Phloem	0.716812
Zm00001d009359	OG0009269	Phloem	0.715355
Zm00001d042996	OG0011911	Phloem	0.71528
Zm00001d029699	OG0000307	Phloem	0.713209
Zm00001d005698	OG0012013	Phloem	0.712759
Zm00001d021850	OG0001227	Phloem	0.711421
Zm00001d034558	OG0001861	Phloem	0.710093
Zm00001d012899	OG0000250	Phloem	0.709581
Zm00001d012635	OG0004512	Phloem	0.70912
Zm00001d017282	OG0008357	Phloem	0.708394
Zm00001d042214	OG0000282	Phloem	0.705431
Zm00001d010736	OG0000028	Phloem	0.705316
Zm00001d021677	OG0013918	Phloem	0.705312
Zm00001d027550	OG0011515	Phloem	0.704411
Zm00001d045298	OG0001265	Phloem	0.703284
Zm00001d024066	OG0007978	Phloem	0.702575
Zm00001d014804	OG0016540	Phloem	0.702295
Zm00001d043808	OG0003174	Phloem	0.701112
Zm00001d010698	OG0003628	Phloem	0.700242
Zm00001d021752	OG0000711	Phloem	0.699977
Zm00001d019467	OG0007820	Phloem	0.699453
Zm00001d027949	OG0013442	Phloem	0.698927
Zm00001d005315	OG0003765	Phloem	0.698913
Zm00001d022421	OG0016671	Phloem	0.698739
Zm00001d042961	OG0001509	Phloem	0.698691
Zm00001d021788	OG0000174	Phloem	0.697904
Zm00001d004509	OG0000193	Phloem	0.696286
Zm00001d032162	OG0004987	Phloem	0.695654
Zm00001d042207	OG0007078	Phloem	0.695318
Zm00001d022026	OG0021065	Phloem	0.694733
Zm00001d005856	OG0009022	Phloem	0.694243
Zm00001d042909	OG0008599	Phloem	0.694124
Zm00001d028815	OG0001258	Phloem	0.691161
Zm00001d042104	OG0000115	Phloem	0.690807
Zm00001d045392	OG0000989	Stele2	1.27401
Zm00001d046055	OG0001241	Stele2	1.10973
Zm00001d037894	OG0002678	Stele2	1.06922
Zm00001d045391	OG0000989	Stele2	1.05931
Zm00001d016625	OG0019504	Stele2	1.0522
Zm00001d037941	OG0016345	Stele2	0.981057
Zm00001d045370	OG0010190	Stele2	0.978925
Zm00001d010588	OG0000522	Stele2	0.967449
Zm00001d047582	OG0005901	Stele2	0.955004
Zm00001d051223	OG0019590	Stele2	0.93764
Zm00001d045390	OG0000989	Stele2	0.909573
Zm00001d009797	OG0000842	Stele2	0.904353
Zm00001d015905	OG0003173	Stele2	0.83196
Zm00001d027924	OG0000730	Stele2	0.83192
Zm00001d009373	OG0015206	Stele2	0.822412
Zm00001d006158	OG0003293	Stele2	0.813837
Zm00001d039648	OG0003138	Stele2	0.805887
Zm00001d042225	OG0019287	Stele2	0.786031
Zm00001d029656	OG0016591	Stele2	0.785554
Zm00001d027520	OG0000265	Stele2	0.784518
Zm00001d015434	OG0001512	Stele2	0.776165
Zm00001d025872	OG0000755	Stele2	0.774537
Zm00001d039771	OG0015331	Stele2	0.773715
Zm00001d012241	OG0005191	Stele2	0.771547
Zm00001d038288	OG0003740	Stele2	0.766135
Zm00001d025081	OG0003239	Stele2	0.764948
Zm00001d009103	OG0005958	Stele2	0.750267
Zm00001d012712	OG0000704	Stele2	0.743993
Zm00001d011373	OG0015459	Stele2	0.730334
Zm00001d018106	OG0003840	Stele2	0.72964
Zm00001d043653	OG0004328	Stele2	0.727316
Zm00001d025371	OG0016180	Stele2	0.719407
Zm00001d028778	OG0000390	Stele2	0.718973
Zm00001d038476	OG0000736	Stele2	0.709936
Zm00001d011156	OG0012062	Stele2	0.708126
Zm00001d014945	OG0002698	Stele2	0.707633
Zm00001d048843	OG0010298	Stele2	0.703356
Zm00001d002159	OG0000635	Stele2	0.701062
Zm00001d041871	OG0022688	Stele2	0.698097
Zm00001d033941	OG0020046	Stele2	0.693068
Zm00001d051339	OG0011387	Stele2	0.693067
Zm00001d038832	OG0002931	Stele2	0.686332
Zm00001d000168	OG0002043	Stele2	0.684487
Zm00001d011208	OG0019027	Stele2	0.677354
Zm00001d031127	OG0021920	Stele2	0.665959
Zm00001d012603	OG0000178	Stele2	0.661751
Zm00001d018031	OG0019669	Stele2	0.660298
Zm00001d029711	OG0021609	Stele2	0.656827
Zm00001d013052	OG0001295	Stele2	0.655889
Zm00001d021390	OG0003286	Stele2	0.648599
Zm00001d033019	OG0001429	Stele2	0.646085
Zm00001d023859	OG0021884	Stele2	0.639942
Zm00001d004509	OG0000193	Stele2	0.637767
Zm00001d029172	OG0013934	Stele2	0.636296
Zm00001d026012	OG0003681	Stele2	0.625066
Zm00001d015777	OG0011063	Stele2	0.624847
Zm00001d022427	OG0000379	Stele2	0.618007
Zm00001d012720	OG0015514	Stele2	0.61568
Zm00001d012221	OG0010588	Stele2	0.614494
Zm00001d023376	OG0009678	Stele2	0.614108
Zm00001d022518	OG0004206	Stele2	0.613284
Zm00001d005769	OG0009086	Stele2	0.612854
Zm00001d033980	OG0000259	Stele2	0.607315
Zm00001d017107	OG0006955	Stele2	0.604076
Zm00001d031555	OG0000774	Stele2	0.601331
Zm00001d002576	OG0001508	Stele2	0.60037
Zm00001d026096	OG0001060	Stele2	0.598157
Zm00001d024645	OG0006928	Stele2	0.597616
Zm00001d048085	OG0015906	Stele2	0.594375
Zm00001d046134	OG0007658	Stele2	0.590201
Zm00001d023510	OG0014092	Stele2	0.578928
Zm00001d024379	OG0010249	Stele2	0.578556
Zm00001d040461	OG0002468	Stele2	0.577944
Zm00001d017570	OG0002730	Stele2	0.576654
Zm00001d020364	OG0016721	Stele2	0.575539
Zm00001d012292	OG0013456	Stele2	0.570453
Zm00001d053699	OG0017149	Stele2	0.569936
Zm00001d017425	OG0019598	Stele2	0.567019
Zm00001d040292	OG0012473	Stele2	0.562346
Zm00001d011614	OG0013424	Stele2	0.562161
Zm00001d033925	OG0009765	Stele2	0.558305
Zm00001d010736	OG0000028	Stele2	0.555808
Zm00001d018244	OG0019687	Stele2	0.554524
Zm00001d022461	OG0021111	Stele2	0.554176
Zm00001d051653	OG0015792	Stele2	0.552239
Zm00001d029067	OG0009227	Stele2	0.547525
Zm00001d001868	OG0016296	Stele2	0.543847
Zm00001d033745	OG0022962	Stele2	0.540724
Zm00001d038870	OG0009968	Stele2	0.53658
Zm00001d016364	OG0003270	Stele2	0.533891
Zm00001d005849	OG0001318	Stele2	0.532356
Zm00001d050300	OG0012877	Stele2	0.532111
Zm00001d049016	OG0014068	Stele2	0.530691
Zm00001d037792	OG0020471	Stele2	0.530307
Zm00001d036737	OG0001238	Stele2	0.529951
Zm00001d030968	OG0004776	Stele2	0.529233
Zm00001d038999	OG0020619	Stele2	0.528404
Zm00001d008312	OG0015376	Stele2	0.527061
Zm00001d033998	OG0016059	Stele2	0.527057
Zm00001d036839	OG0007241	Stele2	0.524818
Zm00001d021774	OG0009096	Stele2	0.524259
Zm00001d014944	OG0002698	Stele2	0.523772
Zm00001d010901	OG0005594	Stele2	0.523174
Zm00001d041920	OG0001828	Stele2	0.520688
Zm00001d042996	OG0011911	Stele2	0.520224
Zm00001d005238	OG0004819	Stele2	0.51857
Zm00001d040735	OG0002257	Stele2	0.515927
Zm00001d051863	OG0009520	Stele2	0.51549
Zm00001d048294	OG0003560	Stele2	0.514231
Zm00001d006160	OG0005027	Stele2	0.511162
Zm00001d029177	OG0011000	Stele2	0.509145
Zm00001d027375	OG0003726	Stele2	0.505998
Zm00001d012010	OG0015596	Stele2	0.505466
Zm00001d029783	OG0000265	Stele2	0.504882
Zm00001d046687	OG0007086	Stele2	0.504535
Zm00001d013707	OG0016014	Stele2	0.504235
Zm00001d038348	OG0001581	Stele2	0.503132
Zm00001d027846	OG0019791	Stele2	0.502712
Zm00001d044950	OG0002244	Stele2	0.500199
Zm00001d054084	OG0000591	Stele2	0.499155
Zm00001d041604	OG0017072	Stele2	0.498972
Zm00001d010885	OG0015410	Stele2	0.496523
Zm00001d040274	OG0000684	Stele2	0.496113
Zm00001d003114	OG0002743	Stele2	0.49595
Zm00001d048203	OG0004952	Stele2	0.495233
Zm00001d050874	OG0003106	Stele2	0.493826
Zm00001d049510	OG0010227	Stele2	0.493764
Zm00001d010956	OG0013775	Stele2	0.492866
Zm00001d002958	OG0000268	Stele2	0.492368
Zm00001d053641	OG0000594	Stele2	0.491625
Zm00001d052371	OG0000618	Stele2	0.490765
Zm00001d052190	OG0015809	Stele2	0.490747
Zm00001d007765	OG0020951	Stele2	0.489083
Zm00001d038810	OG0001398	Stele2	0.488014
Zm00001d014046	OG0002115	Stele2	0.487784
Zm00001d025799	OG0004535	Stele2	0.486266
Zm00001d039338	OG0002503	Stele2	0.485729
Zm00001d016664	OG0006970	Stele2	0.483047
Zm00001d002158	OG0000635	Stele2	0.481354
Zm00001d039120	OG0002357	Stele2	0.479607
Zm00001d022236	OG0009155	Stele2	0.478132
Zm00001d022132	OG0001783	Stele2	0.478098
Zm00001d022416	OG0001920	Stele2	0.477357
Zm00001d002451	OG0003479	Stele2	0.477197
Zm00001d026632	OG0003497	Stele2	0.475169
Zm00001d005727	OG0006061	Stele2	0.4744
Zm00001d029539	OG0015986	Stele2	0.474177
Zm00001d038772	OG0009583	Stele2	0.473299
Zm00001d033711	OG0002553	Stele2	0.472683
Zm00001d046352	OG0000679	Stele2	0.470302
Zm00001d047260	OG0022957	Stele2	0.469756
Zm00001d003751	OG0016180	Stele2	0.469726
Zm00001d047942	OG0008305	Stele2	0.466265
Zm00001d002898	OG0013770	Stele2	0.464718
Zm00001d034346	OG0008091	Stele2	0.464277
Zm00001d020748	OG0001022	Stele2	0.463518
Zm00001d017645	OG0000409	Stele2	0.462782
Zm00001d021952	OG0016632	Stele2	0.4615
Zm00001d044365	OG0015156	Stele2	0.4614
Zm00001d010540	OG0009986	Stele2	0.460663
Zm00001d048424	OG0005126	Stele2	0.460026
Zm00001d037751	OG0001337	Stele2	0.459578
Zm00001d050043	OG0001310	Stele2	0.459334
Zm00001d014494	OG0020860	Stele2	0.457357
Zm00001d044144	OG0009958	Stele2	0.457006
Zm00001d008700	OG0000556	Stele2	0.456667
Zm00001d038540	OG0020563	Stele2	0.456163
Zm00001d052087	OG0001031	Stele2	0.4539
Zm00001d045028	OG0002204	Stele2	0.453883
Zm00001d052903	OG0007357	Stele2	0.453433
Zm00001d001933	OG0000768	Stele2	0.453265
Zm00001d023694	OG0000854	Stele2	0.453226
Zm00001d021628	OG0001190	Stele2	0.453153
Zm00001d038065	OG0005885	Stele2	0.451693
Zm00001d039513	OG0002311	Stele2	0.450417
Zm00001d043523	OG0000614	Endodermal_Initials	1.76488
Zm00001d010434	OG0000514	Endodermal_Initials	1.50409
Zm00001d016818	OG0008916	Endodermal_Initials	1.41239
Zm00001d052619	OG0005336	Endodermal_Initials	1.38561
Zm00001d032181	OG0001328	Endodermal_Initials	1.3511
Zm00001d031640	OG0001454	Endodermal_Initials	1.34391
Zm00001d047186	OG0002811	Endodermal_Initials	1.31737
Zm00001d026426	OG0008808	Endodermal_Initials	1.28888
Zm00001d028714	OG0008741	Endodermal_Initials	1.27363
Zm00001d013222	OG0001100	Endodermal_Initials	1.26317
Zm00001d045889	OG0003373	Endodermal_Initials	1.25275
Zm00001d029124	OG0001158	Endodermal_Initials	1.22277
GRMZM5G838396	OG0002833	Endodermal_Initials	1.22234
Zm00001d045069	OG0001717	Endodermal_Initials	1.20961
Zm00001d027595	OG0005336	Endodermal_Initials	1.19361
Zm00001d024522	OG0004960	Endodermal_Initials	1.19213
Zm00001d004839	OG0001061	Endodermal_Initials	1.1911
Zm00001d010016	OG0000746	Endodermal_Initials	1.18974
Zm00001d045390	OG0000989	Endodermal_Initials	1.18904
Zm00001d047470	OG0001920	Endodermal_Initials	1.18528
Zm00001d006064	OG0003604	Endodermal_Initials	1.16714
Zm00001d036567	OG0023089	Endodermal_Initials	1.15778
Zm00001d053632	OG0002099	Endodermal_Initials	1.15683
Zm00001d018410	OG0001912	Endodermal_Initials	1.14695
Zm00001d018466	OG0010736	Endodermal_Initials	1.13464
GRMZM5G867512	OG0005152	Endodermal_Initials	1.13155
Zm00001d006651	OG0000254	Endodermal_Initials	1.12999
Zm00001d048253	OG0001378	Endodermal_Initials	1.12188
Zm00001d009509	OG0003476	Endodermal_Initials	1.11675
Zm00001d013873	OG0000071	Endodermal_Initials	1.10762
Zm00001d052075	OG0001017	Endodermal_Initials	1.10541
GRMZM5G834666	OG0010357	Endodermal_Initials	1.10137
Zm00001d000120	OG0002565	Endodermal_Initials	1.09858
Zm00001d048368	OG0000832	Endodermal_Initials	1.09248
Zm00001d037732	OG0004105	Endodermal_Initials	1.0905
Zm00001d006871	OG0001378	Endodermal_Initials	1.08302
Zm00001d016491	OG0006226	Endodermal_Initials	1.0816
Zm00001d014082	OG0001290	Endodermal_Initials	1.08139
Zm00001d047271	OG0004492	Endodermal_Initials	1.08053
Zm00001d051543	OG0000905	Endodermal_Initials	1.07871
Zm00001d004855	OG0000064	Endodermal_Initials	1.07853
Zm00001d036568	OG0002565	Endodermal_Initials	1.0756
Zm00001d029747	OG0003849	Endodermal_Initials	1.07483
Zm00001d036565	OG0023089	Endodermal_Initials	1.06729
Zm00001d021839	OG0001861	Endodermal_Initials	1.06035
Zm00001d009652	OG0000377	Endodermal_Initials	1.05
Zm00001d045392	OG0000989	Endodermal_Initials	1.04716
Zm00001d053177	OG0000071	Endodermal_Initials	1.04331
Zm00001d034855	OG0000821	Endodermal_Initials	1.04177
Zm00001d053442	OG0001490	Endodermal_Initials	1.03922
Zm00001d046317	OG0000746	Endodermal_Initials	1.03817
Zm00001d007940	OG0000710	Endodermal_Initials	1.03351
Zm00001d036708	OG0002002	Endodermal_Initials	1.03309
Zm00001d009000	OG0001792	Endodermal_Initials	1.03099
Zm00001d029263	OG0002207	Endodermal_Initials	1.0269
Zm00001d012211	OG0000695	Endodermal_Initials	1.02598
Zm00001d049619	OG0001127	Endodermal_Initials	1.02486
Zm00001d006287	OG0002550	Endodermal_Initials	1.01282
Zm00001d032287	OG0000733	Endodermal_Initials	1.00399
Zm00001d039106	OG0001301	Endodermal_Initials	1.00177
Zm00001d036570	OG0001982	Endodermal_Initials	1.00116
Zm00001d023887	OG0000413	Endodermal_Initials	0.997578
Zm00001d050921	OG0001374	Endodermal_Initials	0.996767
Zm00001d027527	OG0001378	Endodermal_Initials	0.9952
Zm00001d039372	OG0022735	Endodermal_Initials	0.993597
Zm00001d012992	OG0002481	Endodermal_Initials	0.985686
Zm00001d011741	OG0000627	Endodermal_Initials	0.984211
Zm00001d010030	OG0003540	Endodermal_Initials	0.983147
Zm00001d022111	OG0001445	Endodermal_Initials	0.981172
Zm00001d043752	OG0004826	Endodermal_Initials	0.979637
Zm00001d041727	OG0001956	Endodermal_Initials	0.979477
Zm00001d007031	OG0002207	Endodermal_Initials	0.978979
Zm00001d034550	OG0001045	Endodermal_Initials	0.978415
Zm00001d043158	OG0000101	Endodermal_Initials	0.977882
Zm00001d053636	OG0002099	Endodermal_Initials	0.970754
Zm00001d046778	OG0015177	Endodermal_Initials	0.96637
Zm00001d009657	OG0000377	Endodermal_Initials	0.962809
Zm00001d024511	OG0001445	Endodermal_Initials	0.96165
Zm00001d026254	OG0000924	Endodermal_Initials	0.960674
Zm00001d053754	OG0012629	Endodermal_Initials	0.959551
Zm00001d038682	OG0023123	Endodermal_Initials	0.958446
Zm00001d014887	OG0008904	Endodermal_Initials	0.956686
Zm00001d008716	OG0000689	Endodermal_Initials	0.953278
Zm00001d009579	OG0001732	Endodermal_Initials	0.950512
Zm00001d012221	OG0010588	Endodermal_Initials	0.949692
Zm00001d001899	OG0000377	Endodermal_Initials	0.948023
Zm00001d006100	OG0001454	Endodermal_Initials	0.947416
Zm00001d051929	OG0000832	Endodermal_Initials	0.940746
Zm00001d040880	OG0015290	Endodermal_Initials	0.940393
Zm00001d040773	OG0001662	Endodermal_Initials	0.939206
Zm00001d037929	OG0003292	Endodermal_Initials	0.93774
Zm00001d042386	OG0004410	Endodermal_Initials	0.936866
Zm00001d053746	OG0015648	Endodermal_Initials	0.935815
Zm00001d051419	OG0015772	Endodermal_Initials	0.935022
Zm00001d017047	OG0001374	Endodermal_Initials	0.934928
Zm00001d032480	OG0000071	Endodermal_Initials	0.932344
Zm00001d049552	OG0017486	Endodermal_Initials	0.930863
Zm00001d045121	OG0004938	Endodermal_Initials	0.929255
Zm00001d003672	OG0001208	Endodermal_Initials	0.928534
Zm00001d021850	OG0001227	Endodermal_Initials	0.923643
Zm00001d004841	OG0001061	Endodermal_Initials	0.921238
Zm00001d047707	OG0003151	Endodermal_Initials	0.920991
Zm00001d003181	OG0002623	Endodermal_Initials	0.920597
Zm00001d022307	OG0002207	Endodermal_Initials	0.91941
Zm00001d017555	OG0015776	Endodermal_Initials	0.919273
Zm00001d008982	OG0018888	Endodermal_Initials	0.91621
Zm00001d018024	OG0005387	Endodermal_Initials	0.914412
Zm00001d051223	OG0019590	Endodermal_Initials	0.913196
Zm00001d003127	OG0001863	Endodermal_Initials	0.907304
Zm00001d018696	OG0009381	Endodermal_Initials	0.906919
Zm00001d005753	OG0017514	Endodermal_Initials	0.906835
Zm00001d027500	OG0001030	Endodermal_Initials	0.905755
Zm00001d018080	OG0010869	Endodermal_Initials	0.904595
Zm00001d040375	OG0002940	Endodermal_Initials	0.904398
Zm00001d029872	OG0001895	Endodermal_Initials	0.900871
Zm00001d054065	OG0001806	Endodermal_Initials	0.899449
Zm00001d038531	OG0006430	Endodermal_Initials	0.899118
Zm00001d016031	OG0001265	Endodermal_Initials	0.897868
Zm00001d025784	OG0001863	Endodermal_Initials	0.897394
Zm00001d018056	OG0005213	Endodermal_Initials	0.89697
Zm00001d009868	OG0000174	Endodermal_Initials	0.894296
Zm00001d053547	OG0000746	Endodermal_Initials	0.891625
Zm00001d014888	OG0020888	Endodermal_Initials	0.891478
Zm00001d009848	OG0002614	Endodermal_Initials	0.891105
Zm00001d019045	OG0000525	Endodermal_Initials	0.889688
Zm00001d043420	OG0001490	Endodermal_Initials	0.889613
Zm00001d044455	OG0001729	Endodermal_Initials	0.889013
Zm00001d035201	OG0001127	Endodermal_Initials	0.888347
Zm00001d019577	OG0005688	Endodermal_Initials	0.887082
Zm00001d006388	OG0001567	Endodermal_Initials	0.886042
Zm00001d046330	OG0006934	Endodermal_Initials	0.885513
Zm00001d017914	OG0009408	Endodermal_Initials	0.884231
Zm00001d017238	OG0023342	Endodermal_Initials	0.883007
Zm00001d038923	OG0001423	Endodermal_Initials	0.882726
Zm00001d015025	OG0009937	Endodermal_Initials	0.87923
Zm00001d010736	OG0000028	Endodermal_Initials	0.877991
Zm00001d021652	OG0001185	Endodermal_Initials	0.876742
Zm00001d049351	OG0005968	Endodermal_Initials	0.875469
Zm00001d047697	OG0004675	Endodermal_Initials	0.872016
Zm00001d042313	OG0013475	Endodermal_Initials	0.871519
Zm00001d042664	OG0001789	Endodermal_Initials	0.869301
Zm00001d039663	OG0023158	Endodermal_Initials	0.864895
Zm00001d021511	OG0001567	Endodermal_Initials	0.862347
Zm00001d003680	OG0001061	Endodermal_Initials	0.862008
Zm00001d033846	OG0020036	Endodermal_Initials	0.859422
Zm00001d042725	OG0007504	Endodermal_Initials	0.855364
Zm00001d027618	OG0001290	Endodermal_Initials	0.854773
Zm00001d048159	OG0000932	Endodermal_Initials	0.853925
Zm00001d049815	OG0004105	Endodermal_Initials	0.848439
Zm00001d012556	OG0000101	Endodermal_Initials	0.848417
Zm00001d020170	OG0004496	Endodermal_Initials	0.847649
Zm00001d041568	OG0002512	Endodermal_Initials	0.846588
Zm00001d043318	OG0004077	Endodermal_Initials	0.844675
Zm00001d040399	OG0001142	Endodermal_Initials	0.844174
Zm00001d033479	OG0006100	Endodermal_Initials	0.843581
Zm00001d032285	OG0000733	Endodermal_Initials	0.842563
Zm00001d028002	OG0001240	Endodermal_Initials	0.838758
Zm00001d021020	OG0003604	Endodermal_Initials	0.837848
Zm00001d035666	OG0020406	Endodermal_Initials	0.837786
Zm00001d017242	OG0011587	Endodermal_Initials	0.836666
Zm00001d034731	OG0001440	Endodermal_Initials	0.83598
GRMZM5G845244	OG0018790	Endodermal_Initials	0.835561
Zm00001d012911	OG0023347	Endodermal_Initials	0.834669
Zm00001d003683	OG0001061	Endodermal_Initials	0.833583
Zm00001d018957	OG0001531	Endodermal_Initials	0.832143
Zm00001d013642	OG0006100	Endodermal_Initials	0.82936
Zm00001d053004	OG0000316	Endodermal_Initials	0.827711
Zm00001d031569	OG0002696	Endodermal_Initials	0.826338
Zm00001d007824	OG0001531	Endodermal_Initials	0.826097
Zm00001d026286	OG0000930	Endodermal_Initials	0.825582
Zm00001d036964	OG0012616	Endodermal_Initials	0.821412
Zm00001d000310	OG0004077	Endodermal_Initials	0.820436
Zm00001d009653	OG0000377	Endodermal_Initials	0.820033
Zm00001d010504	OG0001040	Endodermal_Initials	0.817075
Zm00001d009224	OG0008257	Endodermal_Initials	0.816455
Zm00001d026588	OG0009092	Endodermal_Initials	0.815223
Zm00001d010798	OG0005181	Endodermal_Initials	0.812212
Zm00001d002450	OG0000905	Endodermal_Initials	0.811857
Zm00001d002905	OG0007426	Endodermal_Initials	0.806897
Zm00001d025062	OG0008228	Endodermal_Initials	0.805393
Zm00001d038088	OG0009448	Endodermal_Initials	0.805095
Zm00001d045391	OG0000989	Endodermal_Initials	0.804991
Zm00001d050920	OG0001374	Endodermal_Initials	0.800778
Zm00001d032760	OG0001290	Endodermal_Initials	0.799826
Zm00001d028426	OG0003432	Endodermal_Initials	0.79646
Zm00001d003346	OG0016209	Endodermal_Initials	0.795713
Zm00001d003865	OG0000202	Endodermal_Initials	0.793787
Zm00001d047962	OG0001426	Endodermal_Initials	0.793774
Zm00001d024925	OG0008127	Endodermal_Initials	0.792572
Zm00001d022174	OG0006521	Endodermal_Initials	0.79191
Zm00001d051008	OG0000078	Endodermal_Initials	0.791513
Zm00001d043558	OG0010625	Endodermal_Initials	0.791273
Zm00001d028787	OG0011583	Endodermal_Initials	0.791063
Zm00001d038126	OG0008530	Endodermal_Initials	0.790985
Zm00001d033489	OG0020007	Endodermal_Initials	0.789693
Zm00001d040257	OG0009545	Endodermal_Initials	0.784947
Zm00001d043702	OG0020601	Endodermal_Initials	0.783458
Zm00001d002339	OG0000930	Endodermal_Initials	0.783442
Zm00001d025413	OG0001208	Endodermal_Initials	0.782626
Zm00001d047477	OG0000620	Endodermal_Initials	0.781685
Zm00001d012080	OG0013471	Cortex_like	2.12821
Zm00001d052651	OG0008132	Cortex_like	2.03006
Zm00001d025873	OG0020287	Cortex_like	1.8997
Zm00001d017292	OG0019585	Cortex_like	1.64374
Zm00001d020958	OG0014254	Cortex_like	1.57118
Zm00001d039607	OG0000045	Cortex_like	1.55397
Zm00001d033683	OG0008136	Cortex_like	1.55093
Zm00001d012081	OG0023150	Cortex_like	1.51555
Zm00001d010434	OG0000514	Cortex_like	1.43372
Zm00001d047116	OG0001267	Cortex_like	1.41443
Zm00001d027394	OG0000056	Cortex_like	1.39757
Zm00001d026163	OG0000499	Cortex_like	1.3962
Zm00001d002546	OG0000056	Cortex_like	1.37469
Zm00001d019045	OG0000525	Cortex_like	1.35652
Zm00001d020585	OG0000056	Cortex_like	1.35611
Zm00001d014887	OG0008904	Cortex_like	1.35559
Zm00001d003725	OG0000062	Cortex_like	1.35518
Zm00001d024522	OG0004960	Cortex_like	1.32245
Zm00001d016818	OG0008916	Cortex_like	1.31725
Zm00001d047115	OG0001267	Cortex_like	1.31463
Zm00001d047113	OG0001267	Cortex_like	1.30922
Zm00001d005791	OG0000056	Cortex_like	1.304
Zm00001d047117	OG0001267	Cortex_like	1.29045
Zm00001d019312	OG0002894	Cortex_like	1.28495
Zm00001d014758	OG0005398	Cortex_like	1.27824
Zm00001d027760	OG0001380	Cortex_like	1.27779
Zm00001d025406	OG0000062	Cortex_like	1.27425
Zm00001d047114	OG0001267	Cortex_like	1.27422
Zm00001d021477	OG0000056	Cortex_like	1.27081
Zm00001d013612	OG0000101	Cortex_like	1.25871
Zm00001d025018	OG0002396	Cortex_like	1.2525
Zm00001d010617	OG0016368	Cortex_like	1.24802
Zm00001d034319	OG0003288	Cortex_like	1.24218
Zm00001d052619	OG0005336	Cortex_like	1.2372
Zm00001d029859	OG0007222	Cortex_like	1.22938
Zm00001d028474	OG0008342	Cortex_like	1.22545
Zm00001d038453	OG0003549	Cortex_like	1.21723
Zm00001d002543	OG0000056	Cortex_like	1.20894
Zm00001d047124	OG0004753	Cortex_like	1.19256
Zm00001d043752	OG0004826	Cortex_like	1.17211
GRMZM5G867512	OG0005152	Cortex_like	1.17175
Zm00001d012276	OG0000062	Cortex_like	1.166
Zm00001d028368	OG0003007	Cortex_like	1.15917
Zm00001d047470	OG0001920	Cortex_like	1.14604
GRMZM5G834666	OG0010357	Cortex_like	1.13694
Zm00001d008669	OG0000056	Cortex_like	1.13502
Zm00001d040508	OG0023207	Cortex_like	1.10891
Zm00001d020584	OG0000056	Cortex_like	1.10411
Zm00001d014947	OG0015621	Cortex_like	1.09407
Zm00001d039790	OG0000062	Cortex_like	1.08738
Zm00001d053684	OG0004589	Cortex_like	1.08691
Zm00001d044455	OG0001729	Cortex_like	1.08588
Zm00001d015852	OG0004760	Cortex_like	1.08399
Zm00001d002004	OG0013763	Cortex_like	1.0804
Zm00001d002601	OG0005977	Cortex_like	1.07887
Zm00001d037492	OG0000288	Cortex_like	1.07522
Zm00001d051478	OG0000056	Cortex_like	1.07387
Zm00001d007940	OG0000710	Cortex_like	1.07202
Zm00001d002132	OG0022754	Cortex_like	1.06824
GRMZM5G838396	OG0002833	Cortex_like	1.06619
Zm00001d002035	OG0016285	Cortex_like	1.05293
Zm00001d020984	OG0002556	Cortex_like	1.05104
Zm00001d029872	OG0001895	Cortex_like	1.04771
Zm00001d032442	OG0000759	Cortex_like	1.04431
Zm00001d024952	OG0001135	Cortex_like	1.04125
Zm00001d050697	OG0000062	Cortex_like	1.03122
Zm00001d017070	OG0005062	Cortex_like	1.02921
Zm00001d023309	OG0003177	Cortex_like	1.02837
Zm00001d018535	OG0002779	Cortex_like	1.02796
Zm00001d014366	OG0000361	Cortex_like	1.02755
Zm00001d026415	OG0006921	Cortex_like	1.02644
Zm00001d003822	OG0002496	Cortex_like	1.02359
Zm00001d026431	OG0007168	Cortex_like	1.02146
Zm00001d048558	OG0010308	Cortex_like	1.01886
Zm00001d016274	OG0001197	Cortex_like	1.01871
Zm00001d008843	OG0002746	Cortex_like	1.01861
Zm00001d052041	OG0002342	Cortex_like	1.01652
Zm00001d022569	OG0005037	Cortex_like	1.00995
Zm00001d023395	OG0009406	Cortex_like	1.00885
Zm00001d042730	OG0000062	Cortex_like	1.00728
Zm00001d028707	OG0003495	Cortex_like	1.00549
Zm00001d023901	OG0002315	Cortex_like	0.999429
Zm00001d008295	OG0000221	Cortex_like	0.994569
Zm00001d042035	OG0002556	Cortex_like	0.994516
Zm00001d012837	OG0000525	Cortex_like	0.987411
Zm00001d038531	OG0006430	Cortex_like	0.970698
Zm00001d008266	OG0001142	Cortex_like	0.970274
Zm00001d052480	OG0010324	Cortex_like	0.969929
Zm00001d018410	OG0001912	Cortex_like	0.96881
Zm00001d003730	OG0000062	Cortex_like	0.964609
Zm00001d021300	OG0000525	Cortex_like	0.963985
Zm00001d022510	OG0011392	Cortex_like	0.962556
Zm00001d039936	OG0000557	Cortex_like	0.9579
Zm00001d036708	OG0002002	Cortex_like	0.955454
Zm00001d034129	OG0000509	Cortex_like	0.954527
Zm00001d014563	OG0007669	Cortex_like	0.951176
Zm00001d037969	OG0000106	Cortex_like	0.948684
Zm00001d043158	OG0000101	Cortex_like	0.944609
Zm00001d019593	OG0016120	Cortex_like	0.94286
Zm00001d039643	OG0021508	Cortex_like	0.936171
Zm00001d019139	OG0006895	Cortex_like	0.936098
Zm00001d027855	OG0001701	Cortex_like	0.933728
Zm00001d041594	OG0009606	Cortex_like	0.92863
Zm00001d043443	OG0004384	Cortex_like	0.924376
Zm00001d011504	OG0001778	Cortex_like	0.918952
Zm00001d040880	OG0015290	Cortex_like	0.916995
Zm00001d022174	OG0006521	Cortex_like	0.913935
Zm00001d013461	OG0008136	Cortex_like	0.913917
Zm00001d042025	OG0007478	Cortex_like	0.911628
Zm00001d013642	OG0006100	Cortex_like	0.911498
Zm00001d005421	OG0000292	Cortex_like	0.91147
Zm00001d036567	OG0023089	Cortex_like	0.908302
Zm00001d039010	OG0016402	Cortex_like	0.899768
Zm00001d033479	OG0006100	Cortex_like	0.89513
Zm00001d000310	OG0004077	Cortex_like	0.892344
Zm00001d003833	OG0001484	Cortex_like	0.885222
Zm00001d041672	OG0000062	Cortex_like	0.882219
Zm00001d027595	OG0005336	Cortex_like	0.880876
Zm00001d002905	OG0007426	Cortex_like	0.873552
Zm00001d044677	OG0017003	Cortex_like	0.872981
Zm00001d026554	OG0002107	Cortex_like	0.872498
Zm00001d032405	OG0019974	Cortex_like	0.869805
Zm00001d010575	OG0000056	Cortex_like	0.868796
Zm00001d030079	OG0007652	Cortex_like	0.866186
Zm00001d040399	OG0001142	Cortex_like	0.864279
Zm00001d044008	OG0019086	Cortex_like	0.86046
Zm00001d053746	OG0015648	Cortex_like	0.859291
Zm00001d041173	OG0003948	Cortex_like	0.85776
Zm00001d022371	OG0006897	Cortex_like	0.853379
Zm00001d016463	OG0007959	Cortex_like	0.852985
Zm00001d053367	OG0000514	Cortex_like	0.848698
Zm00001d015133	OG0019351	Cortex_like	0.84849
Zm00001d048368	OG0000832	Cortex_like	0.846899
Zm00001d036565	OG0023089	Cortex_like	0.845853
Zm00001d011655	OG0000451	Cortex_like	0.845729
Zm00001d013066	OG0010117	Cortex_like	0.844647
Zm00001d019836	OG0009451	Cortex_like	0.842572
Zm00001d029238	OG0006698	Cortex_like	0.839861
Zm00001d009567	OG0016402	Cortex_like	0.835753
Zm00001d042842	OG0011849	Cortex_like	0.833227
Zm00001d038598	OG0000773	Cortex_like	0.832367
Zm00001d034698	OG0004602	Cortex_like	0.83076
Zm00001d026589	OG0009092	Cortex_like	0.829973
Zm00001d021706	OG0001293	Cortex_like	0.829618
Zm00001d045268	OG0000062	Cortex_like	0.828868
Zm00001d036964	OG0012616	Cortex_like	0.827963
Zm00001d011786	OG0000759	Cortex_like	0.825924
Zm00001d033186	OG0006769	Cortex_like	0.825626
Zm00001d053696	OG0000703	Cortex_like	0.824235
Zm00001d039733	OG0000056	Cortex_like	0.820025
Zm00001d026015	OG0000056	Cortex_like	0.816361
Zm00001d004287	OG0002049	Cortex_like	0.815647
Zm00001d011049	OG0009238	Cortex_like	0.814158
Zm00001d039468	OG0002746	Cortex_like	0.814032
Zm00001d021891	OG0000254	Cortex_like	0.812053
Zm00001d028838	OG0003656	Cortex_like	0.811409
Zm00001d047663	OG0006253	Cortex_like	0.810447
Zm00001d044212	OG0009955	Cortex_like	0.810045
Zm00001d048959	OG0014268	Cortex_like	0.80843
Zm00001d040422	OG0018916	Cortex_like	0.806477
Zm00001d025509	OG0012556	Cortex_like	0.805782
Zm00001d033589	OG0008523	Cortex_like	0.804689
Zm00001d020195	OG0009133	Cortex_like	0.803311
Zm00001d002052	OG0008596	Cortex_like	0.801795
Zm00001d020658	OG0011588	Cortex_like	0.8013
Zm00001d027288	OG0010611	Cortex_like	0.800067
Zm00001d038460	OG0003549	Cortex_like	0.798977
Zm00001d050944	OG0005062	Cortex_like	0.798622
Zm00001d008595	OG0003335	Cortex_like	0.798329
Zm00001d029747	OG0003849	Cortex_like	0.79783
Zm00001d042372	OG0004780	Cortex_like	0.796431
Zm00001d044533	OG0003400	Cortex_like	0.796006
Zm00001d012439	OG0000056	Cortex_like	0.795201
Zm00001d003186	OG0007133	Cortex_like	0.793271
Zm00001d038126	OG0008530	Cortex_like	0.791601
Zm00001d008395	OG0005766	Cortex_like	0.785661
Zm00001d028249	OG0019832	Cortex_like	0.785196
Zm00001d016640	OG0003696	Cortex_like	0.783683
Zm00001d031657	OG0000778	Cortex_like	0.781994
Zm00001d035637	OG0004673	Cortex_like	0.780665
Zm00001d052075	OG0001017	Cortex_like	0.775886
Zm00001d009765	OG0008621	Cortex_like	0.775439
Zm00001d009652	OG0000377	Cortex_like	0.774913
Zm00001d014082	OG0001290	Cortex_like	0.774209
Zm00001d018403	OG0001343	Cortex_like	0.770408
Zm00001d049351	OG0005968	Cortex_like	0.769866
Zm00001d032239	OG0003963	Cortex_like	0.76853
Zm00001d001896	OG0012862	Cortex_like	0.7683
Zm00001d024531	OG0010227	Cortex_like	0.768091
Zm00001d047087	OG0014034	Cortex_like	0.767694
Zm00001d011113	OG0006334	Cortex_like	0.7663
Zm00001d047186	OG0002811	Cortex_like	0.766279
Zm00001d053228	OG0000413	Cortex_like	0.765724
Zm00001d021736	OG0021038	Cortex_like	0.765112
Zm00001d014946	OG0003743	Cortex_like	0.764276
Zm00001d044037	OG0001348	Cortex_like	0.76345
Zm00001d001880	OG0009092	Cortex_like	0.763182
Zm00001d020659	OG0009161	Cortex_like	0.762608
Zm00001d027888	OG0019794	Cortex_like	0.761644
Zm00001d043621	OG0000861	Cortex_like	0.758886
Zm00001d020794	OG0001379	Endodermis1	2.33753
Zm00001d027500	OG0001030	Endodermis1	2.20726
Zm00001d035662	OG0007174	Endodermis1	2.19715
Zm00001d049606	OG0015225	Endodermis1	2.16112
Zm00001d019069	OG0006651	Endodermis1	2.10445
Zm00001d044930	OG0014166	Endodermis1	1.98627
Zm00001d052191	OG0001379	Endodermis1	1.88312
Zm00001d033747	OG0000500	Endodermis1	1.85912
Zm00001d017014	OG0000162	Endodermis1	1.76658
Zm00001d040298	OG0001201	Endodermis1	1.76652
Zm00001d020425	OG0014905	Endodermis1	1.75728
Zm00001d050811	OG0020778	Endodermis1	1.72877
Zm00001d024281	OG0006896	Endodermis1	1.58661
Zm00001d051611	OG0019642	Endodermis1	1.53363
Zm00001d035211	OG0007689	Endodermis1	1.53093
Zm00001d031773	OG0001195	Endodermis1	1.51716
Zm00001d009373	OG0015206	Endodermis1	1.50406
Zm00001d050168	OG0010250	Endodermis1	1.48486
Zm00001d030345	OG0021506	Endodermis1	1.45975
Zm00001d053897	OG0000125	Endodermis1	1.45325
Zm00001d045729	OG0013846	Endodermis1	1.45265
Zm00001d015917	OG0003313	Endodermis1	1.44094
Zm00001d013831	OG0023284	Endodermis1	1.25828
Zm00001d038065	OG0005885	Endodermis1	1.25695
Zm00001d043737	OG0005481	Endodermis1	1.25048
Zm00001d014166	OG0006299	Endodermis1	1.24197
Zm00001d037343	OG0001315	Endodermis1	1.23561
Zm00001d038558	OG0001438	Endodermis1	1.22918
Zm00001d046947	OG0016516	Endodermis1	1.22874
Zm00001d003657	OG0013731	Endodermis1	1.2194
Zm00001d027938	OG0006728	Endodermis1	1.21285
Zm00001d017008	OG0019551	Endodermis1	1.20888
Zm00001d004972	OG0003287	Endodermis1	1.206
Zm00001d052336	OG0003783	Endodermis1	1.20193
Zm00001d053404	OG0007010	Endodermis1	1.19792
Zm00001d027330	OG0019737	Endodermis1	1.19481
Zm00001d024386	OG0010249	Endodermis1	1.1845
Zm00001d034427	OG0000927	Endodermis1	1.15952
Zm00001d004467	OG0003201	Endodermis1	1.14868
Zm00001d008325	OG0001201	Endodermis1	1.13427
Zm00001d015569	OG0000288	Endodermis1	1.13048
Zm00001d018211	OG0000855	Endodermis1	1.12586
Zm00001d012242	OG0005190	Endodermis1	1.11464
Zm00001d017461	OG0015763	Endodermis1	1.10922
Zm00001d016992	OG0001556	Endodermis1	1.10514
Zm00001d005895	OG0016817	Endodermis1	1.09872
Zm00001d052172	OG0014166	Endodermis1	1.0971
Zm00001d046112	OG0007010	Endodermis1	1.08308
Zm00001d011813	OG0019313	Endodermis1	1.07987
Zm00001d025773	OG0000439	Endodermis1	1.07013
Zm00001d049926	OG0004414	Endodermis1	1.0582
Zm00001d030339	OG0001113	Endodermis1	1.05379
Zm00001d031655	OG0013972	Endodermis1	1.0521
Zm00001d018200	OG0010055	Endodermis1	1.05047
Zm00001d053952	OG0003721	Endodermis1	1.04857
Zm00001d007271	OG0014067	Endodermis1	1.03965
Zm00001d037297	OG0003581	Endodermis1	1.03726
Zm00001d015912	OG0003173	Endodermis1	1.03529
Zm00001d038688	OG0003615	Endodermis1	1.0249
Zm00001d034560	OG0020081	Endodermis1	1.02241
Zm00001d003569	OG0020243	Endodermis1	1.00406
Zm00001d040466	OG0015385	Endodermis1	1.00341
Zm00001d017386	OG0000907	Endodermis1	1.00002
Zm00001d048311	OG0001918	Endodermis1	0.999556
Zm00001d040171	OG0008442	Endodermis1	0.998284
Zm00001d012602	OG0001120	Endodermis1	0.99693
Zm00001d022421	OG0016671	Endodermis1	0.991559
Zm00001d049081	OG0002808	Endodermis1	0.980388
Zm00001d027854	OG0001918	Endodermis1	0.978388
Zm00001d022351	OG0021100	Endodermis1	0.976431
Zm00001d010814	OG0020594	Endodermis1	0.97356
Zm00001d019467	OG0007820	Endodermis1	0.972073
Zm00001d036475	OG0007014	Endodermis1	0.965115
Zm00001d038608	OG0009529	Endodermis1	0.96392
Zm00001d048473	OG0001973	Endodermis1	0.948142
Zm00001d051859	OG0019721	Endodermis1	0.938977
Zm00001d044226	OG0004968	Endodermis1	0.93721
Zm00001d029389	OG0007138	Endodermis1	0.928437
Zm00001d008397	OG0005632	Endodermis1	0.917068
Zm00001d046625	OG0009126	Endodermis1	0.916245
Zm00001d032324	OG0000407	Endodermis1	0.915784
Zm00001d015686	OG0017149	Endodermis1	0.9116
Zm00001d020025	OG0005853	Endodermis1	0.909011
Zm00001d008961	OG0001241	Endodermis1	0.907446
Zm00001d005470	OG0022615	Endodermis1	0.905463
Zm00001d040786	OG0000532	Endodermis1	0.904111
Zm00001d028806	OG0006236	Endodermis1	0.901446
Zm00001d029457	OG0004300	Endodermis1	0.901019
Zm00001d011657	OG0005481	Endodermis1	0.89498
Zm00001d021971	OG0016633	Endodermis1	0.893042
Zm00001d011734	OG0000861	Endodermis1	0.886039
Zm00001d034062	OG0001068	Endodermis1	0.885369
Zm00001d023664	OG0009578	Endodermis1	0.880567
Zm00001d053965	OG0019346	Endodermis1	0.879433
Zm00001d020345	OG0000422	Endodermis1	0.878598
Zm00001d032322	OG0000422	Endodermis1	0.868834
Zm00001d038297	OG0023119	Endodermis1	0.865875
Zm00001d029849	OG0010065	Endodermis1	0.865566
Zm00001d043249	OG0003628	Endodermis1	0.865465
Zm00001d002842	OG0000907	Endodermis1	0.862261
Zm00001d052371	OG0000618	Endodermis1	0.861044
Zm00001d016760	OG0000532	Endodermis1	0.86046
Zm00001d002131	OG0008409	Endodermis1	0.857426
Zm00001d018229	OG0015817	Endodermis1	0.854347
Zm00001d046157	OG0020790	Endodermis1	0.849231
Zm00001d013390	OG0010111	Endodermis1	0.845419
Zm00001d048131	OG0019818	Endodermis1	0.844603
Zm00001d028102	OG0004680	Endodermis1	0.84331
Zm00001d021938	OG0014242	Endodermis1	0.842889
Zm00001d042618	OG0005097	Endodermis1	0.841529
Zm00001d035916	OG0001498	Endodermis1	0.834894
Zm00001d033805	OG0000258	Endodermis1	0.831834
Zm00001d029539	OG0015986	Endodermis1	0.831459
Zm00001d042662	OG0016785	Endodermis1	0.83014
Zm00001d028785	OG0015948	Endodermis1	0.828634
Zm00001d051863	OG0009520	Endodermis1	0.828319
Zm00001d008488	OG0002119	Endodermis1	0.824386
Zm00001d008181	OG0015912	Endodermis1	0.820526
Zm00001d013825	OG0019973	Endodermis1	0.818698
Zm00001d002897	OG0013770	Endodermis1	0.816706
Zm00001d047211	OG0007138	Endodermis1	0.816667
Zm00001d047779	OG0000596	Endodermis1	0.815663
Zm00001d020260	OG0004925	Endodermis1	0.811987
Zm00001d012522	OG0002214	Endodermis1	0.808831
Zm00001d038913	OG0001811	Endodermis1	0.808137
Zm00001d038280	OG0020532	Endodermis1	0.806439
Zm00001d050837	OG0015732	Endodermis1	0.800551
Zm00001d007034	OG0000688	Endodermis1	0.800484
Zm00001d035171	OG0021139	Endodermis1	0.79996
Zm00001d017575	OG0001060	Endodermis1	0.795643
Zm00001d014074	OG0001321	Endodermis1	0.793965
Zm00001d043075	OG0000374	Endodermis1	0.79351
Zm00001d053699	OG0017149	Endodermis1	0.792712
Zm00001d048843	OG0010298	Endodermis1	0.791672
Zm00001d037677	OG0001811	Endodermis1	0.790462
Zm00001d031833	OG0004567	Endodermis1	0.789987
Zm00001d043272	OG0001482	Endodermis1	0.788888
Zm00001d029098	OG0002617	Endodermis1	0.786627
Zm00001d039221	OG0004880	Endodermis1	0.783717
Zm00001d005495	OG0003972	Endodermis1	0.782877
Zm00001d042726	OG0013025	Endodermis1	0.779201
Zm00001d012728	OG0006577	Endodermis1	0.778804
Zm00001d018244	OG0019687	Endodermis1	0.777189
Zm00001d044584	OG0011113	Endodermis1	0.77623
Zm00001d008312	OG0015376	Endodermis1	0.772622
Zm00001d003659	OG0000690	Endodermis1	0.762126
Zm00001d043338	OG0019174	Endodermis1	0.761405
Zm00001d038873	OG0001718	Endodermis1	0.760722
Zm00001d012674	OG0011004	Endodermis1	0.760504
Zm00001d037714	OG0009877	Endodermis1	0.756197
Zm00001d011461	OG0019075	Endodermis1	0.755497
Zm00001d035542	OG0010162	Endodermis1	0.750748
Zm00001d031702	OG0000552	Endodermis1	0.747914
Zm00001d013080	OG0000927	Endodermis1	0.746151
Zm00001d052372	OG0000618	Endodermis1	0.742749
Zm00001d021654	OG0004832	Endodermis1	0.742102
Zm00001d015032	OG0019337	Endodermis1	0.741785
Zm00001d026381	OG0007838	Endodermis1	0.741658
Zm00001d024421	OG0021166	Endodermis1	0.738672
Zm00001d044732	OG0001315	Endodermis1	0.738091
Zm00001d013796	OG0001497	Endodermis1	0.737622
Zm00001d028374	OG0000878	Endodermis1	0.73557
Zm00001d000308	OG0016015	Endodermis1	0.733807
Zm00001d043263	OG0015522	Endodermis1	0.72749
Zm00001d006133	OG0005906	Endodermis1	0.723343
Zm00001d048731	OG0006863	Endodermis1	0.720266
Zm00001d017019	OG0000162	Endodermis1	0.719764
Zm00001d013869	OG0000513	Endodermis1	0.717958
Zm00001d028167	OG0000774	Endodermis1	0.715433
Zm00001d048707	OG0014074	Endodermis1	0.714015
Zm00001d046277	OG0001695	Endodermis1	0.711707
Zm00001d018359	OG0007527	Endodermis1	0.71119
Zm00001d009084	OG0001104	Endodermis1	0.709691
Zm00001d049940	OG0011567	Endodermis1	0.709489
Zm00001d023815	OG0005282	Endodermis1	0.707886
Zm00001d012277	OG0000071	Endodermis1	0.707838
Zm00001d025401	OG0000532	Endodermis1	0.707793
Zm00001d031258	OG0012385	Endodermis1	0.705855
Zm00001d052779	OG0003722	Endodermis1	0.703076
Zm00001d044771	OG0001713	Endodermis1	0.70275
Zm00001d052776	OG0001931	Endodermis1	0.700885
Zm00001d031481	OG0003321	Endodermis1	0.697792
Zm00001d036737	OG0001238	Endodermis1	0.696138
Zm00001d028954	OG0011757	Endodermis1	0.694458
Zm00001d044291	OG0019028	Endodermis1	0.692552
Zm00001d049910	OG0000634	Endodermis1	0.692385
Zm00001d027881	OG0012829	Endodermis1	0.690924
Zm00001d018363	OG0008432	Endodermis1	0.690802
Zm00001d017920	OG0006385	Endodermis1	0.689348
Zm00001d045210	OG0022893	Endodermis1	0.683878
Zm00001d015401	OG0000682	Endodermis1	0.682703
Zm00001d053706	OG0001540	Endodermis1	0.680786
Zm00001d034561	OG0008598	Endodermis1	0.68031
Zm00001d024518	OG0005388	Endodermis1	0.67974
Zm00001d050908	OG0001556	Endodermis1	0.679695
Zm00001d044769	OG0000858	Endodermis1	0.679685
Zm00001d033038	OG0009130	Endodermis1	0.677214
Zm00001d015905	OG0003173	Endodermis1	0.675554
Zm00001d032475	OG0000513	Endodermis1	0.67528
Zm00001d032710	OG0011211	Endodermis1	0.674794
Zm00001d032822	OG0023037	Epidermis	3.06002
Zm00001d052068	OG0015824	Epidermis	2.43953
Zm00001d023280	OG0022779	Epidermis	2.27555
Zm00001d025754	OG0022681	Epidermis	2.20432
Zm00001d049336	OG0001893	Epidermis	2.17547
Zm00001d042179	OG0019294	Epidermis	2.12939
Zm00001d014100	OG0023037	Epidermis	2.10845
Zm00001d004721	OG0017470	Epidermis	2.06213
Zm00001d043898	OG0015475	Epidermis	2.0599
Zm00001d009957	OG0023088	Epidermis	2.05042
Zm00001d017095	OG0005038	Epidermis	1.98761
Zm00001d044660	OG0022779	Epidermis	1.97614
Zm00001d040379	OG0000736	Epidermis	1.9652
Zm00001d027855	OG0001701	Epidermis	1.93118
Zm00001d018324	OG0015824	Epidermis	1.89647
Zm00001d039947	OG0003955	Epidermis	1.88649
Zm00001d053862	OG0015640	Epidermis	1.82799
Zm00001d010617	OG0016368	Epidermis	1.80804
Zm00001d033063	OG0001184	Epidermis	1.8058
Zm00001d019312	OG0002894	Epidermis	1.79923
Zm00001d006933	OG0010092	Epidermis	1.78963
Zm00001d036069	OG0010203	Epidermis	1.78146
Zm00001d021477	OG0000056	Epidermis	1.69382
Zm00001d053696	OG0000703	Epidermis	1.69189
Zm00001d052619	OG0005336	Epidermis	1.68175
Zm00001d003725	OG0000062	Epidermis	1.6727
Zm00001d027394	OG0000056	Epidermis	1.67075
Zm00001d026251	OG0016261	Epidermis	1.66281
Zm00001d034635	OG0003438	Epidermis	1.61711
Zm00001d002546	OG0000056	Epidermis	1.60148
Zm00001d019045	OG0000525	Epidermis	1.57599
Zm00001d037547	OG0016327	Epidermis	1.56184
Zm00001d032570	OG0007236	Epidermis	1.55809
Zm00001d020585	OG0000056	Epidermis	1.55688
Zm00001d037969	OG0000106	Epidermis	1.55545
Zm00001d032055	OG0010258	Epidermis	1.55098
Zm00001d043590	OG0000418	Epidermis	1.54621
Zm00001d039636	OG0005665	Epidermis	1.54264
Zm00001d051478	OG0000056	Epidermis	1.54211
Zm00001d025406	OG0000062	Epidermis	1.54153
Zm00001d008843	OG0002746	Epidermis	1.5325
Zm00001d021300	OG0000525	Epidermis	1.52068
Zm00001d024178	OG0001893	Epidermis	1.51445
Zm00001d028249	OG0019832	Epidermis	1.50925
Zm00001d005791	OG0000056	Epidermis	1.50176
Zm00001d002897	OG0013770	Epidermis	1.49488
Zm00001d024982	OG0014096	Epidermis	1.48898
Zm00001d038382	OG0002877	Epidermis	1.46163
Zm00001d032405	OG0019974	Epidermis	1.45523
Zm00001d012276	OG0000062	Epidermis	1.45074
Zm00001d021017	OG0001930	Epidermis	1.43626
Zm00001d039468	OG0002746	Epidermis	1.42123
Zm00001d004728	OG0017470	Epidermis	1.41499
Zm00001d002601	OG0005977	Epidermis	1.41441
Zm00001d008669	OG0000056	Epidermis	1.4132
Zm00001d039790	OG0000062	Epidermis	1.41081
Zm00001d010169	OG0023260	Epidermis	1.39556
Zm00001d032886	OG0010521	Epidermis	1.38231
Zm00001d027760	OG0001380	Epidermis	1.38167
Zm00001d028584	OG0019863	Epidermis	1.37923
Zm00001d010924	OG0020420	Epidermis	1.31677
Zm00001d002543	OG0000056	Epidermis	1.31378
Zm00001d029703	OG0010307	Epidermis	1.31156
Zm00001d043443	OG0004384	Epidermis	1.30261
Zm00001d012837	OG0000525	Epidermis	1.30048
Zm00001d048954	OG0005074	Epidermis	1.29397
Zm00001d047096	OG0023028	Epidermis	1.29316
Zm00001d049169	OG0021733	Epidermis	1.28936
Zm00001d026014	OG0004690	Epidermis	1.28721
Zm00001d036072	OG0014414	Epidermis	1.26974
Zm00001d043258	OG0000430	Epidermis	1.26952
Zm00001d022517	OG0000378	Epidermis	1.26598
Zm00001d003730	OG0000062	Epidermis	1.26117
Zm00001d002548	OG0004690	Epidermis	1.25694
Zm00001d004729	OG0022794	Epidermis	1.25462
Zm00001d042730	OG0000062	Epidermis	1.25398
Zm00001d050697	OG0000062	Epidermis	1.24924
Zm00001d042930	OG0000133	Epidermis	1.24886
Zm00001d020584	OG0000056	Epidermis	1.24663
Zm00001d023901	OG0002315	Epidermis	1.23881
Zm00001d040090	OG0004613	Epidermis	1.237
Zm00001d046834	OG0020846	Epidermis	1.23404
Zm00001d027288	OG0010611	Epidermis	1.23219
Zm00001d038192	OG0020519	Epidermis	1.22482
Zm00001d029238	OG0006698	Epidermis	1.22248
GRMZM5G838396	OG0002833	Epidermis	1.20311
Zm00001d045069	OG0001717	Epidermis	1.20177
Zm00001d049881	OG0012599	Epidermis	1.19947
Zm00001d026589	OG0009092	Epidermis	1.19932
Zm00001d013066	OG0010117	Epidermis	1.18951
Zm00001d003659	OG0000690	Epidermis	1.18936
Zm00001d018410	OG0001912	Epidermis	1.18592
Zm00001d040245	OG0010632	Epidermis	1.1853
Zm00001d008295	OG0000221	Epidermis	1.18024
Zm00001d054089	OG0000587	Epidermis	1.16946
Zm00001d026015	OG0000056	Epidermis	1.16687
Zm00001d037250	OG0010219	Epidermis	1.16175
Zm00001d021433	OG0003053	Epidermis	1.14757
Zm00001d003436	OG0000982	Epidermis	1.14337
Zm00001d034731	OG0001440	Epidermis	1.1431
Zm00001d012439	OG0000056	Epidermis	1.14296
Zm00001d011903	OG0019295	Epidermis	1.1341
Zm00001d007301	OG0001671	Epidermis	1.134
Zm00001d034782	OG0016114	Epidermis	1.13309
Zm00001d040880	OG0015290	Epidermis	1.13187
Zm00001d033241	OG0012419	Epidermis	1.13134
Zm00001d042102	OG0000115	Epidermis	1.12775
Zm00001d032181	OG0001328	Epidermis	1.12707
GRMZM5G867512	OG0005152	Epidermis	1.12679
Zm00001d032794	OG0003371	Epidermis	1.12333
Zm00001d049619	OG0001127	Epidermis	1.12181
Zm00001d014887	OG0008904	Epidermis	1.11479
Zm00001d039695	OG0009124	Epidermis	1.111
Zm00001d050224	OG0021191	Epidermis	1.11083
Zm00001d025590	OG0008808	Epidermis	1.11035
Zm00001d037041	OG0010196	Epidermis	1.10866
Zm00001d036250	OG0000062	Epidermis	1.10779
Zm00001d031853	OG0013159	Epidermis	1.10491
Zm00001d004725	OG0017470	Epidermis	1.09709
Zm00001d030391	OG0010196	Epidermis	1.09392
Zm00001d027718	OG0002396	Epidermis	1.09023
Zm00001d045478	OG0005977	Epidermis	1.08865
Zm00001d032950	OG0005074	Epidermis	1.08825
Zm00001d014758	OG0005398	Epidermis	1.08746
Zm00001d047081	OG0004489	Epidermis	1.08654
Zm00001d036567	OG0023089	Epidermis	1.06844
Zm00001d003187	OG0022681	Epidermis	1.06755
Zm00001d001899	OG0000377	Epidermis	1.0649
Zm00001d047186	OG0002811	Epidermis	1.06054
Zm00001d010030	OG0003540	Epidermis	1.05804
Zm00001d017849	OG0003629	Epidermis	1.05718
Zm00001d052625	OG0017018	Epidermis	1.05669
Zm00001d015468	OG0019386	Epidermis	1.05567
Zm00001d013067	OG0010117	Epidermis	1.05324
Zm00001d048090	OG0002335	Epidermis	1.05036
Zm00001d052075	OG0001017	Epidermis	1.04942
Zm00001d046317	OG0000746	Epidermis	1.0482
Zm00001d024981	OG0014096	Epidermis	1.04639
Zm00001d016640	OG0003696	Epidermis	1.0422
Zm00001d034109	OG0007122	Epidermis	1.04171
Zm00001d047499	OG0006425	Epidermis	1.03897
Zm00001d027717	OG0002396	Epidermis	1.03725
Zm00001d002452	OG0002387	Epidermis	1.02883
Zm00001d040075	OG0018807	Epidermis	1.02875
Zm00001d002899	OG0020399	Epidermis	1.02337
Zm00001d012992	OG0002481	Epidermis	1.01442
Zm00001d011236	OG0000133	Epidermis	1.01063
Zm00001d041727	OG0001956	Epidermis	1.01043
Zm00001d041672	OG0000062	Epidermis	1.0032
Zm00001d037249	OG0010219	Epidermis	1.00292
Zm00001d048683	OG0016864	Epidermis	1.00203
Zm00001d044157	OG0003816	Epidermis	1.00137
Zm00001d021706	OG0001293	Epidermis	1.00042
Zm00001d009509	OG0003476	Epidermis	0.996022
Zm00001d017671	OG0007115	Epidermis	0.995266
Zm00001d035115	OG0002208	Epidermis	0.994391
Zm00001d037492	OG0000288	Epidermis	0.988682
Zm00001d044246	OG0000525	Epidermis	0.987069
Zm00001d050368	OG0003963	Epidermis	0.982975
Zm00001d053632	OG0002099	Epidermis	0.982263
Zm00001d010575	OG0000056	Epidermis	0.977299
Zm00001d008210	OG0001289	Epidermis	0.977284
Zm00001d007084	OG0000133	Epidermis	0.97718
Zm00001d006871	OG0001378	Epidermis	0.972359
Zm00001d006057	OG0002325	Epidermis	0.971912
Zm00001d002970	OG0003492	Epidermis	0.971437
Zm00001d039733	OG0000056	Epidermis	0.966722
Zm00001d002035	OG0016285	Epidermis	0.964688
Zm00001d045889	OG0003373	Epidermis	0.962879
Zm00001d041173	OG0003948	Epidermis	0.959825
Zm00001d012729	OG0001813	Epidermis	0.959516
Zm00001d002141	OG0013759	Epidermis	0.957435
Zm00001d036568	OG0002565	Epidermis	0.956448
Zm00001d034550	OG0001045	Epidermis	0.956416
Zm00001d052101	OG0015821	Epidermis	0.955195
Zm00001d012281	OG0015568	Epidermis	0.954946
Zm00001d038291	OG0000917	Epidermis	0.954814
Zm00001d018466	OG0010736	Epidermis	0.954328
Zm00001d000310	OG0004077	Epidermis	0.952943
Zm00001d048368	OG0000832	Epidermis	0.952898
Zm00001d018312	OG0015823	Epidermis	0.950029
Zm00001d009579	OG0001732	Epidermis	0.944062
Zm00001d051860	OG0014802	Epidermis	0.942891
Zm00001d029124	OG0001158	Epidermis	0.942418
Zm00001d003127	OG0001863	Epidermis	0.94071
Zm00001d036978	OG0004911	Epidermis	0.940707
Zm00001d036565	OG0023089	Epidermis	0.939301
Zm00001d047787	OG0000525	Epidermis	0.938918
Zm00001d015025	OG0009937	Epidermis	0.935751
Zm00001d014013	OG0001139	Epidermis	0.93495
Zm00001d039183	OG0002125	Epidermis	0.933551
Zm00001d004839	OG0001061	Epidermis	0.932414
Zm00001d027595	OG0005336	Epidermis	0.932297
Zm00001d043226	OG0005185	Epidermis	0.931218
Zm00001d010872	OG0009724	Epidermis	0.929586
Zm00001d042936	OG0009986	Epidermis	0.929455
Zm00001d045268	OG0000062	Epidermis	0.928362
Zm00001d009566	OG0002400	Epidermis	0.917946
Zm00001d048776	OG0014084	Epidermis	0.917181
Zm00001d038724	OG0006707	Epidermis	0.914864
Zm00001d035689	OG0001727	Xylem	3.47134
Zm00001d032972	OG0013176	Xylem	2.5642
Zm00001d043276	OG0019186	Xylem	2.05739
Zm00001d034621	OG0007150	Xylem	1.91456
Zm00001d043477	OG0006668	Xylem	1.89405
Zm00001d032501	OG0010770	Xylem	1.74622
Zm00001d011787	OG0001727	Xylem	1.74599
Zm00001d002828	OG0000146	Xylem	1.68445
Zm00001d025564	OG0002553	Xylem	1.67842
Zm00001d006106	OG0021446	Xylem	1.55366
Zm00001d008255	OG0009923	Xylem	1.48439
Zm00001d032618	OG0000740	Xylem	1.47862
Zm00001d044648	OG0003436	Xylem	1.46435
Zm00001d014965	OG0015697	Xylem	1.42464
Zm00001d052433	OG0012737	Xylem	1.41668
Zm00001d039946	OG0015317	Xylem	1.38929
Zm00001d022561	OG0004918	Xylem	1.38439
Zm00001d043921	OG0003607	Xylem	1.38297
Zm00001d017936	OG0019657	Xylem	1.3213
Zm00001d004208	OG0006438	Xylem	1.32019
Zm00001d048611	OG0010085	Xylem	1.29946
Zm00001d008312	OG0015376	Xylem	1.29506
Zm00001d012167	OG0006150	Xylem	1.29373
Zm00001d050394	OG0016734	Xylem	1.25296
Zm00001d004495	OG0001072	Xylem	1.24053
Zm00001d004721	OG0017470	Xylem	1.23726
Zm00001d053952	OG0003721	Xylem	1.23028
Zm00001d032776	OG0012971	Xylem	1.21414
Zm00001d047424	OG0015967	Xylem	1.1548
Zm00001d013222	OG0001100	Xylem	1.1488
Zm00001d023434	OG0003102	Xylem	1.14316
Zm00001d048802	OG0003090	Xylem	1.13818
Zm00001d013582	OG0005602	Xylem	1.1276
Zm00001d014983	OG0000623	Xylem	1.12661
Zm00001d013154	OG0009823	Xylem	1.12033
Zm00001d026012	OG0003681	Xylem	1.10084
Zm00001d002956	OG0001691	Xylem	1.09044
Zm00001d051403	OG0000416	Xylem	1.08917
Zm00001d039770	OG0003708	Xylem	1.08535
Zm00001d045085	OG0012354	Xylem	1.08305
Zm00001d028073	OG0002067	Xylem	1.08121
Zm00001d050039	OG0021124	Xylem	1.07051
Zm00001d018618	OG0000773	Xylem	1.06094
Zm00001d011468	OG0015467	Xylem	1.05986
Zm00001d020869	OG0011876	Xylem	1.05898
Zm00001d023575	OG0005276	Xylem	1.04757
Zm00001d028170	OG0011478	Xylem	1.02872
Zm00001d046492	OG0004183	Xylem	1.02571
Zm00001d046866	OG0020849	Xylem	1.00479
Zm00001d040297	OG0018910	Xylem	1.00083
Zm00001d050899	OG0000250	Xylem	0.992749
Zm00001d021324	OG0016860	Xylem	0.990031
Zm00001d022597	OG0010270	Xylem	0.966941
Zm00001d040541	OG0011771	Xylem	0.959343
Zm00001d022262	OG0000895	Xylem	0.954239
Zm00001d029499	OG0000202	Xylem	0.944639
Zm00001d022082	OG0002814	Xylem	0.938209
Zm00001d040364	OG0001606	Xylem	0.928075
Zm00001d012241	OG0005191	Xylem	0.927252
Zm00001d018149	OG0015812	Xylem	0.926684
Zm00001d021615	OG0001080	Xylem	0.915545
Zm00001d043036	OG0005942	Xylem	0.915376
Zm00001d029012	OG0010741	Xylem	0.913295
Zm00001d005654	OG0013987	Xylem	0.896036
Zm00001d007045	OG0003416	Xylem	0.895322
Zm00001d044982	OG0003580	Xylem	0.892763
Zm00001d018393	OG0011792	Xylem	0.890983
Zm00001d015036	OG0000327	Xylem	0.886542
Zm00001d024386	OG0010249	Xylem	0.885152
Zm00001d028167	OG0000774	Xylem	0.881715
Zm00001d048890	OG0003768	Xylem	0.88009
Zm00001d031993	OG0000410	Xylem	0.879547
Zm00001d034373	OG0004681	Xylem	0.877026
Zm00001d029699	OG0000307	Xylem	0.876796
Zm00001d005775	OG0009397	Xylem	0.873609
Zm00001d025566	OG0016199	Xylem	0.852007
Zm00001d011958	OG0000301	Xylem	0.850827
Zm00001d021949	OG0012669	Xylem	0.846778
Zm00001d030103	OG0016945	Xylem	0.842489
Zm00001d047814	OG0003715	Xylem	0.841221
Zm00001d016683	OG0001148	Xylem	0.840902
Zm00001d020903	OG0004504	Xylem	0.838547
Zm00001d032672	OG0008328	Xylem	0.825754
Zm00001d042243	OG0019286	Xylem	0.825695
Zm00001d023568	OG0021820	Xylem	0.822826
Zm00001d010732	OG0003615	Xylem	0.821028
Zm00001d043965	OG0009640	Xylem	0.820772
Zm00001d028830	OG0001320	Xylem	0.82057
Zm00001d046945	OG0007840	Xylem	0.818174
Zm00001d024294	OG0010995	Xylem	0.816055
Zm00001d031619	OG0007686	Xylem	0.813314
Zm00001d027431	OG0004303	Xylem	0.813055
Zm00001d014006	OG0008328	Xylem	0.810667
Zm00001d002958	OG0000268	Xylem	0.808827
Zm00001d003072	OG0003266	Xylem	0.806126
Zm00001d052336	OG0003783	Xylem	0.804074
Zm00001d023459	OG0021811	Xylem	0.803172
Zm00001d008965	OG0006597	Xylem	0.799076
Zm00001d011225	OG0013398	Xylem	0.798836
Zm00001d043075	OG0000374	Xylem	0.790602
Zm00001d039251	OG0001781	Xylem	0.787215
Zm00001d015977	OG0004896	Xylem	0.785271
Zm00001d044947	OG0002295	Xylem	0.784304
Zm00001d032893	OG0013581	Xylem	0.781283
Zm00001d028043	OG0003107	Xylem	0.780302
Zm00001d018565	OG0002841	Xylem	0.779737
Zm00001d026632	OG0003497	Xylem	0.7797
Zm00001d004635	OG0007547	Xylem	0.7796
Zm00001d026597	OG0010154	Xylem	0.776676
Zm00001d009707	OG0004601	Xylem	0.776268
Zm00001d047764	OG0008512	Xylem	0.774855
Zm00001d052190	OG0015809	Xylem	0.765329
Zm00001d035171	OG0021139	Xylem	0.762757
Zm00001d002835	OG0003236	Xylem	0.762574
Zm00001d016054	OG0023337	Xylem	0.760714
Zm00001d040691	OG0007418	Xylem	0.760435
Zm00001d028187	OG0002061	Xylem	0.750289
Zm00001d022529	OG0006810	Xylem	0.749826
Zm00001d018080	OG0010869	Xylem	0.749616
Zm00001d008295	OG0000221	Xylem	0.74712
Zm00001d046953	OG0010495	Xylem	0.746086
Zm00001d020872	OG0016827	Xylem	0.741772
Zm00001d032186	OG0004104	Xylem	0.741286
Zm00001d032407	OG0002299	Xylem	0.740697
Zm00001d017441	OG0019600	Xylem	0.740696
Zm00001d048795	OG0000826	Xylem	0.738771
Zm00001d037829	OG0014039	Xylem	0.737373
Zm00001d020623	OG0009446	Xylem	0.736567
Zm00001d047750	OG0015945	Xylem	0.736274
Zm00001d039004	OG0003607	Xylem	0.736122
Zm00001d034560	OG0020081	Xylem	0.736115
Zm00001d048460	OG0008031	Xylem	0.735809
Zm00001d000012	OG0017672	Xylem	0.732837
Zm00001d004751	OG0002439	Xylem	0.731845
Zm00001d022334	OG0016655	Xylem	0.731199
Zm00001d038004	OG0008312	Xylem	0.73023
Zm00001d030551	OG0001431	Xylem	0.722265
Zm00001d006910	OG0003109	Xylem	0.722049
Zm00001d051439	OG0001060	Xylem	0.721858
Zm00001d042455	OG0001680	Xylem	0.719183
Zm00001d044495	OG0001914	Xylem	0.718997
Zm00001d026137	OG0011517	Xylem	0.717713
Zm00001d017282	OG0008357	Xylem	0.715923
Zm00001d033211	OG0013643	Xylem	0.715906
Zm00001d052734	OG0001420	Xylem	0.712037
Zm00001d025921	OG0020294	Xylem	0.708408
Zm00001d040107	OG0003558	Xylem	0.708379
Zm00001d015129	OG0007472	Xylem	0.708263
Zm00001d046676	OG0009637	Xylem	0.707663
Zm00001d025951	OG0002535	Xylem	0.706224
Zm00001d010814	OG0020594	Xylem	0.703906
Zm00001d046897	OG0008117	Xylem	0.699657
Zm00001d048914	OG0009335	Xylem	0.699655
Zm00001d039066	OG0003520	Xylem	0.699547
Zm00001d046055	OG0001241	Xylem	0.699461
Zm00001d022351	OG0021100	Xylem	0.697311
Zm00001d045582	OG0001755	Xylem	0.697161
Zm00001d038810	OG0001398	Xylem	0.695187
Zm00001d022517	OG0000378	Xylem	0.694858
Zm00001d041880	OG0011522	Xylem	0.69451
Zm00001d017885	OG0001170	Xylem	0.693794
Zm00001d024996	OG0007366	Xylem	0.692987
Zm00001d025338	OG0001148	Xylem	0.691674
Zm00001d038224	OG0004101	Xylem	0.690943
Zm00001d045046	OG0013834	Xylem	0.68504
Zm00001d004744	OG0022880	Xylem	0.683889
Zm00001d033800	OG0001090	Xylem	0.682658
Zm00001d045470	OG0003388	Xylem	0.681668
Zm00001d030544	OG0002301	Xylem	0.681359
Zm00001d032620	OG0000819	Xylem	0.680228
Zm00001d046455	OG0000295	Xylem	0.679812
Zm00001d039472	OG0009911	Xylem	0.678413
Zm00001d023262	OG0011549	Xylem	0.677575
Zm00001d018220	OG0000115	Xylem	0.677501
Zm00001d048333	OG0002071	Xylem	0.677293
Zm00001d039144	OG0001099	Xylem	0.676445
Zm00001d020692	OG0021421	Xylem	0.675848
Zm00001d038357	OG0016360	Xylem	0.675733
Zm00001d048471	OG0004303	Xylem	0.674523
Zm00001d023270	OG0011573	Xylem	0.674193
Zm00001d024734	OG0013778	Xylem	0.673216
Zm00001d031655	OG0013972	Xylem	0.673172
Zm00001d035741	OG0014886	Xylem	0.672098
Zm00001d028392	OG0008305	Xylem	0.670823
Zm00001d052792	OG0021714	Xylem	0.667955
Zm00001d026664	OG0016303	Xylem	0.666875
Zm00001d003364	OG0000162	Xylem	0.665226
Zm00001d000308	OG0016015	Xylem	0.664737
Zm00001d002257	OG0002453	Xylem	0.664428
Zm00001d040066	OG0015304	Xylem	0.661286
Zm00001d043234	OG0001711	Xylem	0.659751
Zm00001d017474	OG0013547	Xylem	0.65929
Zm00001d024047	OG0007547	Xylem	0.657933
Zm00001d016705	OG0019513	Xylem	0.656235
Zm00001d002087	OG0012504	Xylem	0.654747
Zm00001d032897	OG0006259	Xylem	0.65402
Zm00001d013108	OG0004681	Xylem	0.65365
Zm00001d024943	OG0001232	Xylem	0.652989
Zm00001d034995	OG0008765	Xylem	0.65212
Zm00001d015776	OG0000594	Xylem	0.651148
Zm00001d049606	OG0015225	Endodermis2	2.89224
Zm00001d023477	OG0009365	Endodermis2	2.70199
Zm00001d021674	OG0005618	Endodermis2	2.58772
Zm00001d019069	OG0006651	Endodermis2	2.41781
Zm00001d020794	OG0001379	Endodermis2	2.34566
Zm00001d050168	OG0010250	Endodermis2	2.32339
Zm00001d027500	OG0001030	Endodermis2	2.27301
Zm00001d037173	OG0014166	Endodermis2	2.22753
Zm00001d027539	OG0019758	Endodermis2	2.03957
Zm00001d016992	OG0001556	Endodermis2	2.01896
Zm00001d044930	OG0014166	Endodermis2	1.98913
Zm00001d043523	OG0000614	Endodermis2	1.844
Zm00001d032410	OG0019458	Endodermis2	1.66986
Zm00001d042857	OG0006837	Endodermis2	1.63537
Zm00001d020425	OG0014905	Endodermis2	1.62
Zm00001d043234	OG0001711	Endodermis2	1.58591
Zm00001d020257	OG0003653	Endodermis2	1.55927
Zm00001d029444	OG0019953	Endodermis2	1.5344
Zm00001d003346	OG0016209	Endodermis2	1.49727
Zm00001d005895	OG0016817	Endodermis2	1.46927
Zm00001d034560	OG0020081	Endodermis2	1.44751
Zm00001d040246	OG0018902	Endodermis2	1.42035
Zm00001d008646	OG0003120	Endodermis2	1.41519
Zm00001d048799	OG0021776	Endodermis2	1.40571
Zm00001d040466	OG0015385	Endodermis2	1.39812
Zm00001d010755	OG0005673	Endodermis2	1.38501
Zm00001d016818	OG0008916	Endodermis2	1.37567
Zm00001d024105	OG0010250	Endodermis2	1.36987
Zm00001d005159	OG0007820	Endodermis2	1.36053
Zm00001d043621	OG0000861	Endodermis2	1.35928
Zm00001d016568	OG0012868	Endodermis2	1.31024
Zm00001d021971	OG0016633	Endodermis2	1.30021
Zm00001d025771	OG0009540	Endodermis2	1.29367
Zm00001d016567	OG0001235	Endodermis2	1.28036
Zm00001d045729	OG0013846	Endodermis2	1.27345
Zm00001d045564	OG0008088	Endodermis2	1.26596
Zm00001d042386	OG0004410	Endodermis2	1.25069
Zm00001d024281	OG0006896	Endodermis2	1.24868
Zm00001d053442	OG0001490	Endodermis2	1.24328
Zm00001d029747	OG0003849	Endodermis2	1.23957
Zm00001d038608	OG0009529	Endodermis2	1.23375
Zm00001d010211	OG0004024	Endodermis2	1.23218
Zm00001d040275	OG0012801	Endodermis2	1.19138
Zm00001d052783	OG0022860	Endodermis2	1.18872
Zm00001d052619	OG0005336	Endodermis2	1.18263
Zm00001d002141	OG0013759	Endodermis2	1.17295
Zm00001d014888	OG0020888	Endodermis2	1.1707
Zm00001d010434	OG0000514	Endodermis2	1.16675
Zm00001d029872	OG0001895	Endodermis2	1.14534
Zm00001d052171	OG0015813	Endodermis2	1.143
Zm00001d022264	OG0003524	Endodermis2	1.14254
Zm00001d009224	OG0008257	Endodermis2	1.1354
Zm00001d034630	OG0009621	Endodermis2	1.13415
Zm00001d028714	OG0008741	Endodermis2	1.1325
Zm00001d042420	OG0015588	Endodermis2	1.12894
Zm00001d051611	OG0019642	Endodermis2	1.1238
Zm00001d037343	OG0001315	Endodermis2	1.12328
Zm00001d031640	OG0001454	Endodermis2	1.11761
Zm00001d032287	OG0000733	Endodermis2	1.08958
Zm00001d009138	OG0018947	Endodermis2	1.08042
Zm00001d019320	OG0020970	Endodermis2	1.07837
Zm00001d032181	OG0001328	Endodermis2	1.07201
Zm00001d043420	OG0001490	Endodermis2	1.06977
Zm00001d010693	OG0009529	Endodermis2	1.06755
Zm00001d027405	OG0011401	Endodermis2	1.05658
Zm00001d009373	OG0015206	Endodermis2	1.05099
Zm00001d010016	OG0000746	Endodermis2	1.04764
Zm00001d034062	OG0001068	Endodermis2	1.04361
Zm00001d047186	OG0002811	Endodermis2	1.04017
Zm00001d016491	OG0006226	Endodermis2	1.03275
Zm00001d030345	OG0021506	Endodermis2	1.02959
Zm00001d045889	OG0003373	Endodermis2	1.02924
Zm00001d011718	OG0015235	Endodermis2	1.02627
Zm00001d026589	OG0009092	Endodermis2	1.01784
Zm00001d029124	OG0001158	Endodermis2	1.01494
Zm00001d016493	OG0003559	Endodermis2	1.0148
Zm00001d007157	OG0006261	Endodermis2	1.01184
GRMZM5G867512	OG0005152	Endodermis2	1.00945
Zm00001d047211	OG0007138	Endodermis2	1.00775
Zm00001d039372	OG0022735	Endodermis2	1.007
Zm00001d029263	OG0002207	Endodermis2	1.00294
Zm00001d040773	OG0001662	Endodermis2	0.995155
Zm00001d010649	OG0020564	Endodermis2	0.993197
Zm00001d039221	OG0004880	Endodermis2	0.990742
Zm00001d047849	OG0015934	Endodermis2	0.989924
Zm00001d008330	OG0009205	Endodermis2	0.984411
GRMZM5G834666	OG0010357	Endodermis2	0.981253
Zm00001d018696	OG0009381	Endodermis2	0.978579
Zm00001d034855	OG0000821	Endodermis2	0.978213
Zm00001d027595	OG0005336	Endodermis2	0.977582
Zm00001d015715	OG0000470	Endodermis2	0.976821
Zm00001d045069	OG0001717	Endodermis2	0.972407
Zm00001d006064	OG0003604	Endodermis2	0.967693
Zm00001d006651	OG0000254	Endodermis2	0.963924
Zm00001d007031	OG0002207	Endodermis2	0.962894
Zm00001d027681	OG0006837	Endodermis2	0.961203
Zm00001d043422	OG0015514	Endodermis2	0.957054
Zm00001d044446	OG0009470	Endodermis2	0.954406
Zm00001d048368	OG0000832	Endodermis2	0.95382
Zm00001d018410	OG0001912	Endodermis2	0.953057
Zm00001d021705	OG0002266	Endodermis2	0.952087
Zm00001d038088	OG0009448	Endodermis2	0.947803
Zm00001d040375	OG0002940	Endodermis2	0.944373
Zm00001d043736	OG0013427	Endodermis2	0.943956
Zm00001d038288	OG0003740	Endodermis2	0.941001
Zm00001d053632	OG0002099	Endodermis2	0.938626
Zm00001d019836	OG0009451	Endodermis2	0.936392
GRMZM5G838396	OG0002833	Endodermis2	0.935684
Zm00001d031471	OG0014816	Endodermis2	0.932687
Zm00001d046947	OG0016516	Endodermis2	0.930258
Zm00001d028524	OG0015933	Endodermis2	0.928886
Zm00001d018466	OG0010736	Endodermis2	0.927446
Zm00001d027527	OG0001378	Endodermis2	0.926831
Zm00001d013873	OG0000071	Endodermis2	0.925895
Zm00001d036567	OG0023089	Endodermis2	0.925713
Zm00001d026426	OG0008808	Endodermis2	0.924849
Zm00001d047271	OG0004492	Endodermis2	0.924347
Zm00001d020345	OG0000422	Endodermis2	0.923264
Zm00001d036570	OG0001982	Endodermis2	0.922265
Zm00001d036565	OG0023089	Endodermis2	0.920191
Zm00001d004839	OG0001061	Endodermis2	0.915007
Zm00001d037413	OG0001573	Endodermis2	0.912036
Zm00001d009000	OG0001792	Endodermis2	0.911726
GRMZM5G800101	OG0000388	Endodermis2	0.910536
Zm00001d010030	OG0003540	Endodermis2	0.908069
Zm00001d020195	OG0009133	Endodermis2	0.907868
Zm00001d036568	OG0002565	Endodermis2	0.906013
Zm00001d034561	OG0008598	Endodermis2	0.905794
Zm00001d043830	OG0001928	Endodermis2	0.905346
Zm00001d032480	OG0000071	Endodermis2	0.901274
Zm00001d010451	OG0001265	Endodermis2	0.898962
Zm00001d027394	OG0000056	Endodermis2	0.897007
Zm00001d009509	OG0003476	Endodermis2	0.896047
Zm00001d005791	OG0000056	Endodermis2	0.895641
Zm00001d040298	OG0001201	Endodermis2	0.895341
Zm00001d017238	OG0023342	Endodermis2	0.895289
Zm00001d027330	OG0019737	Endodermis2	0.890212
Zm00001d024854	OG0010720	Endodermis2	0.887292
Zm00001d052075	OG0001017	Endodermis2	0.88579
Zm00001d018988	OG0014847	Endodermis2	0.885722
Zm00001d049789	OG0001930	Endodermis2	0.884743
Zm00001d027881	OG0012829	Endodermis2	0.884432
Zm00001d048253	OG0001378	Endodermis2	0.877663
Zm00001d016519	OG0014396	Endodermis2	0.876297
Zm00001d052174	OG0015812	Endodermis2	0.875675
Zm00001d051543	OG0000905	Endodermis2	0.874646
Zm00001d020585	OG0000056	Endodermis2	0.874448
Zm00001d037732	OG0004105	Endodermis2	0.874339
Zm00001d049984	OG0004010	Endodermis2	0.872391
Zm00001d027618	OG0001290	Endodermis2	0.868285
Zm00001d045351	OG0011167	Endodermis2	0.863717
Zm00001d014082	OG0001290	Endodermis2	0.861623
Zm00001d000120	OG0002565	Endodermis2	0.861619
Zm00001d040880	OG0015290	Endodermis2	0.861568
Zm00001d011658	OG0013427	Endodermis2	0.860431
Zm00001d044455	OG0001729	Endodermis2	0.852541
Zm00001d036708	OG0002002	Endodermis2	0.852021
Zm00001d037477	OG0013828	Endodermis2	0.851885
Zm00001d039106	OG0001301	Endodermis2	0.851563
Zm00001d026368	OG0005507	Endodermis2	0.851055
Zm00001d016154	OG0001490	Endodermis2	0.850924
Zm00001d042725	OG0007504	Endodermis2	0.850697
Zm00001d012719	OG0001490	Endodermis2	0.849812
Zm00001d047470	OG0001920	Endodermis2	0.841773
Zm00001d053177	OG0000071	Endodermis2	0.841682
Zm00001d021938	OG0014242	Endodermis2	0.841135
Zm00001d012930	OG0004602	Endodermis2	0.841029
Zm00001d009910	OG0011726	Endodermis2	0.840349
Zm00001d051929	OG0000832	Endodermis2	0.839662
Zm00001d001841	OG0006821	Endodermis2	0.836337
Zm00001d021891	OG0000254	Endodermis2	0.834988
Zm00001d009868	OG0000174	Endodermis2	0.833317
Zm00001d028025	OG0005913	Endodermis2	0.832309
Zm00001d007872	OG0011479	Endodermis2	0.831418
Zm00001d042936	OG0009986	Endodermis2	0.829591
Zm00001d012992	OG0002481	Endodermis2	0.829418
Zm00001d009567	OG0016402	Endodermis2	0.828852
Zm00001d042600	OG0002947	Endodermis2	0.828761
Zm00001d047753	OG0008741	Endodermis2	0.828143
Zm00001d028453	OG0016230	Endodermis2	0.82661
Zm00001d009445	OG0008051	Endodermis2	0.825163
Zm00001d047992	OG0006392	Endodermis2	0.824941
Zm00001d005753	OG0017514	Endodermis2	0.82409
Zm00001d043558	OG0010625	Endodermis2	0.823708
Zm00001d010740	OG0001405	Endodermis2	0.822725
Zm00001d003672	OG0001208	Endodermis2	0.819164
Zm00001d025375	OG0004255	Endodermis2	0.818908
Zm00001d053731	OG0002002	Endodermis2	0.817099
Zm00001d034698	OG0004602	Endodermis2	0.816284
Zm00001d002450	OG0000905	Endodermis2	0.815167
Zm00001d022307	OG0002207	Endodermis2	0.815129
Zm00001d041727	OG0001956	Endodermis2	0.812702
Zm00001d024511	OG0001445	Endodermis2	0.81247
Zm00001d029495	OG0015979	Endodermis2	0.811886
Zm00001d053685	OG0004589	Endodermis2	0.809713
Zm00001d019045	OG0000525	Endodermis2	0.808994
Zm00001d037540	OG0000952	Endodermis2	0.808401
Zm00001d046155	OG0014998	Endodermis2	0.808145
Zm00001d054065	OG0001806	Endodermis2	0.807588
Zm00001d044133	OG0017543	Endodermis2	0.804219
Zm00001d016625	OG0019504	Stele3	1.75607
Zm00001d040581	OG0015388	Stele3	1.67261
Zm00001d032162	OG0004987	Stele3	1.6568
Zm00001d025402	OG0016183	Stele3	1.52814
Zm00001d045302	OG0001265	Stele3	1.5268
Zm00001d014467	OG0000492	Stele3	1.44216
Zm00001d009373	OG0015206	Stele3	1.35249
Zm00001d049399	OG0001395	Stele3	1.29009
Zm00001d032618	OG0000740	Stele3	1.25978
Zm00001d003707	OG0016183	Stele3	1.25598
Zm00001d015618	OG0009119	Stele3	1.24535
Zm00001d038262	OG0001789	Stele3	1.22995
Zm00001d009740	OG0000955	Stele3	1.22808
Zm00001d045352	OG0002489	Stele3	1.2264
Zm00001d040364	OG0001606	Stele3	1.21681
Zm00001d017485	OG0000929	Stele3	1.21629
Zm00001d003006	OG0000292	Stele3	1.21405
Zm00001d011139	OG0002931	Stele3	1.20497
Zm00001d037343	OG0001315	Stele3	1.181
Zm00001d039842	OG0016644	Stele3	1.17746
Zm00001d041168	OG0003948	Stele3	1.16797
Zm00001d050380	OG0006340	Stele3	1.16649
Zm00001d052336	OG0003783	Stele3	1.12484
Zm00001d021938	OG0014242	Stele3	1.11764
[truncated: 176 more rows]

## Sheet: Maize_SHAP
Marker_Genes	Clusters	Novel	SHAP_values	Orthogroup
Zm00001d029859	Cortex	Novel	0.0103546	OG0007222
Zm00001d018704	Cortex	Novel	0.00802752	OG0022599
Zm00001d026163	Cortex	Novel	0.0068195	OG0000499
Zm00001d047117	Cortex	Novel	0.00659667	OG0001267
Zm00001d047114	Cortex	Novel	0.00579048	OG0001267
Zm00001d041173	Cortex	Novel	0.00528307	OG0003948
Zm00001d026162	Cortex	Novel	0.00442799	OG0000499
Zm00001d051362	Cortex	Novel	0.0044157	OG0000929
Zm00001d008312	Cortex	Novel	0.0044065	OG0015376
Zm00001d015852	Cortex	Novel	0.00379327	OG0004760
Zm00001d009373	Cortex	Novel	0.00293489	OG0015206
Zm00001d002690	Cortex	Novel	0.00255707	OG0000416
Zm00001d017508	Cortex	Novel	0.00231728	OG0000499
Zm00001d027619	Cortex	Novel	0.00224063	OG0006483
Zm00001d042541	Cortex	Novel	0.00212361	OG0023167
Zm00001d027652	Cortex	Novel	0.00198909	OG0008321
Zm00001d024281	Cortex	Novel	0.00181591	OG0006896
Zm00001d051934	Cortex	Novel	0.00180193	OG0000028
Zm00001d047113	Cortex	Novel	0.0017098	OG0001267
Zm00001d019163	Cortex	Novel	0.00162604	OG0011969
Zm00001d044037	Cortex	Novel	0.00161057	OG0001348
Zm00001d042540	Cortex	Novel	0.0016085	OG0023167
Zm00001d021168	Cortex	Novel	0.00151473	OG0000331
Zm00001d033457	Cortex	Novel	0.00136507	OG0000101
Zm00001d029238	Cortex	Novel	0.0012957	OG0006698
Zm00001d033941	Cortex	Novel	0.00127096	OG0020046
Zm00001d037637	Cortex	Novel	0.00125816	OG0000842
Zm00001d019565	Cortex	Novel	0.00125233	OG0000292
Zm00001d015138	Cortex	Novel	0.00123869	OG0013259
Zm00001d033855	Cortex	Novel	0.00121284	OG0011590
Zm00001d005001	Cortex	Novel	0.00118429	OG0000965
Zm00001d022457	Cortex	Novel	0.00117368	OG0021112
Zm00001d053195	Cortex	Novel	0.001138	OG0001421
Zm00001d013809	Cortex	Novel	0.00113669	OG0001184
Zm00001d044677	Cortex	Novel	0.00112036	OG0017003
Zm00001d046186	Cortex	Novel	0.00101925	OG0020794
Zm00001d028230	Cortex	Novel	0.00100603	OG0012819
Zm00001d047089	Cortex	Novel	0.000980224	OG0002892
Zm00001d031727	Cortex	Novel	0.000958253	OG0009684
Zm00001d028721	Cortex	Novel	0.000807721	OG0001073
Zm00001d008210	Cortex	Novel	0.000804361	OG0001289
Zm00001d017526	Cortex	Novel	0.000764357	OG0000416
Zm00001d004921	Cortex	Novel	0.000725633	OG0000028
Zm00001d048723	Cortex	Novel	0.00069671	OG0007077
Zm00001d018809	Cortex	Novel	0.000668949	OG0000158
Zm00001d026177	Cortex	Novel	0.000632428	OG0000929
Zm00001d017288	Cortex	Novel	0.00063142	OG0000292
Zm00001d038221	Cortex	Novel	0.000598218	OG0003979
Zm00001d012456	Cortex	Novel	0.000580103	OG0000888
Zm00001d002266	Cortex	Novel	0.000573394	OG0001911
Zm00001d036234	Cortex	Novel	0.000570876	OG0003732
Zm00001d017575	Cortex	Novel	0.000565708	OG0001060
Zm00001d047674	Cortex	Novel	0.000539598	OG0003656
Zm00001d034382	Cortex	Novel	0.000532044	OG0022848
Zm00001d011477	Cortex	Novel	0.00052181	OG0019083
Zm00001d028744	Cortex	Novel	0.000505232	OG0015946
Zm00001d037733	Cortex	Novel	0.000490193	OG0002542
Zm00001d028750	Cortex	Novel	0.000482566	OG0001939
Zm00001d044762	Cortex	Novel	0.000474159	OG0000985
Zm00001d002564	Cortex	Novel	0.000470649	OG0012531
Zm00001d022277	Cortex	Novel	0.000457665	OG0009060
Zm00001d006034	Cortex	Novel	0.000454231	OG0022611
Zm00001d026334	Cortex	Novel	0.000429874	OG0001911
Zm00001d021653	Cortex	Novel	0.00042929	OG0001067
Zm00001d030199	Cortex	Novel	0.000423773	OG0014013
Zm00001d002004	Cortex	Novel	0.000411553	OG0013763
Zm00001d032480	Cortex	Novel	0.000399029	OG0000071
Zm00001d010632	Cortex	Novel	0.000385437	OG0000375
Zm00001d023680	Cortex	Novel	0.00035342	OG0021865
Zm00001d002402	Cortex	Novel	0.000350201	OG0003256
Zm00001d048021	Cortex	Novel	0.000347022	OG0013598
Zm00001d044747	Cortex	Novel	0.000343648	OG0003472
Zm00001d003283	Cortex	Novel	0.000342683	OG0010138
Zm00001d006158	Cortex	Novel	0.000339481	OG0003293
Zm00001d052518	Cortex	Novel	0.000329365	OG0009781
Zm00001d043174	Cortex	Novel	0.000326146	OG0002463
Zm00001d028164	Cortex	Novel	0.000315603	OG0004156
Zm00001d002630	Cortex	Novel	0.000312442	OG0004899
Zm00001d024587	Cortex	Novel	0.000310884	OG0001404
Zm00001d038558	Cortex	Novel	0.000297317	OG0001438
Zm00001d012968	Cortex	Novel	0.00028655	OG0016100
Zm00001d012992	Cortex	Novel	0.00028559	OG0002481
Zm00001d044426	Cortex	Novel	0.000285401	OG0019049
Zm00001d043047	Cortex	Novel	0.000281627	OG0000736
Zm00001d043338	Cortex	Novel	0.000258377	OG0019174
Zm00001d047492	Cortex	Novel	0.000256188	OG0015959
Zm00001d025887	Cortex	Novel	0.00024593	OG0001291
Zm00001d010912	Cortex	Novel	0.000240484	OG0022716
Zm00001d037972	Cortex	Novel	0.000229958	OG0003540
Zm00001d038521	Cortex	Novel	0.000229846	OG0000484
Zm00001d010662	Cortex	Novel	0.000226479	OG0013248
Zm00001d045269	Cortex	Novel	0.000218231	OG0004745
Zm00001d052254	Cortex	Novel	0.000214816	OG0005213
Zm00001d044769	Cortex	Novel	0.000204784	OG0000858
Zm00001d038688	Cortex	Novel	0.000199826	OG0003615
Zm00001d002451	Cortex	Novel	0.000196971	OG0003479
Zm00001d048625	Cortex	Novel	0.000193423	OG0000028
Zm00001d033024	Cortex	Novel	0.000190095	OG0006119
Zm00001d013830	Cortex	Novel	0.000189084	OG0000141
Zm00001d042225	Cortex	Novel	0.000185229	OG0019287
Zm00001d020417	Cortex	Novel	0.000182897	OG0000474
Zm00001d003414	Cortex	Novel	0.000180521	OG0000378
Zm00001d028806	Cortex	Novel	0.000169962	OG0006236
Zm00001d019560	Cortex	Novel	0.000168842	OG0022597
Zm00001d002958	Cortex	Novel	0.000166423	OG0000268
Zm00001d033623	Cortex	Novel	0.000164042	OG0000188
Zm00001d050893	Cortex	Novel	0.000163226	OG0013536
Zm00001d049954	Cortex	Novel	0.000161773	OG0004664
Zm00001d031267	Cortex	Novel	0.000160647	OG0009840
Zm00001d047330	Cortex	Novel	0.000158135	OG0000325
Zm00001d022458	Cortex	Novel	0.000152998	OG0002882
Zm00001d049860	Cortex	Novel	0.000147355	OG0013972
Zm00001d006211	Cortex	Novel	0.000144571	OG0003645
Zm00001d051798	Cortex	Novel	0.000140242	OG0007703
Zm00001d053715	Cortex	Novel	0.000137539	OG0000937
Zm00001d014757	Cortex	Novel	0.000135145	OG0000480
Zm00001d048903	Cortex	Novel	0.000134809	OG0002884
Zm00001d032760	Cortex	Novel	0.00013451	OG0001290
Zm00001d017386	Cortex	Novel	0.000133137	OG0000907
Zm00001d039764	Cortex	Novel	0.000129449	OG0003297
Zm00001d042449	Cortex	Novel	0.000128306	OG0015586
Zm00001d027991	Cortex	Novel	0.000123105	OG0013595
Zm00001d033187	Cortex	Novel	0.000120852	OG0003186
Zm00001d011041	Cortex	Novel	0.000110487	OG0004536
Zm00001d020556	Cortex	Novel	0.000108552	OG0009050
Zm00001d026026	Cortex	Novel	0.000108457	OG0020328
Zm00001d017726	Cortex	Novel	0.000105317	OG0003756
Zm00001d040773	Cortex	Novel	0.000102487	OG0001662
Zm00001d021286	Cortex	Novel	0.000101804	OG0016850
Zm00001d026572	Cortex	Novel	9.74417e-05	OG0001838
Zm00001d042042	Cortex	Novel	9.02226e-05	OG0019309
Zm00001d052390	Cortex	Novel	8.99484e-05	OG0022799
Zm00001d052192	Cortex	Novel	8.98373e-05	OG0015810
Zm00001d025727	Cortex	Novel	8.83402e-05	OG0016218
Zm00001d005879	Cortex	Novel	8.81223e-05	OG0001042
Zm00001d042572	Cortex	Novel	8.54128e-05	OG0009991
Zm00001d032485	Cortex	Novel	8.48769e-05	OG0004615
Zm00001d051005	Cortex	Novel	8.00809e-05	OG0019564
Zm00001d046687	Cortex	Novel	7.96246e-05	OG0007086
Zm00001d008173	Cortex	Novel	7.7142e-05	OG0015388
Zm00001d025654	Cortex	Novel	7.69946e-05	OG0000162
Zm00001d014623	Cortex	Novel	7.66615e-05	OG0020867
Zm00001d048789	Cortex	Novel	7.62447e-05	OG0017591
Zm00001d042276	Cortex	Novel	7.58987e-05	OG0000373
Zm00001d010007	Cortex	Novel	7.5852e-05	OG0015347
Zm00001d039715	Cortex	Novel	7.46111e-05	OG0023165
Zm00001d039914	Cortex	Novel	7.2698e-05	OG0004805
Zm00001d023918	Cortex	Novel	6.88346e-05	OG0021930
Zm00001d022017	Cortex	Novel	6.81569e-05	OG0000568
Zm00001d049008	Cortex	Novel	6.61624e-05	OG0000395
Zm00001d008200	Cortex	Novel	6.61472e-05	OG0003524
Zm00001d051872	Cortex	Novel	6.48897e-05	OG0000416
Zm00001d016151	Cortex	Novel	6.1562e-05	OG0001232
Zm00001d053617	Cortex	Novel	5.81031e-05	OG0001862
Zm00001d026657	Cortex	Novel	5.78823e-05	OG0001172
Zm00001d048667	Cortex	Novel	5.7718e-05	OG0000789
Zm00001d040004	Cortex	Novel	5.70377e-05	OG0002413
Zm00001d046510	Cortex	Novel	5.68562e-05	OG0001392
Zm00001d007714	Cortex	Novel	5.378e-05	OG0011020
Zm00001d026341	Cortex	Novel	5.34814e-05	OG0016272
Zm00001d024995	Cortex	Novel	5.07288e-05	OG0014296
Zm00001d046824	Cortex	Novel	5.0321e-05	OG0011575
Zm00001d024821	Cortex	Novel	5.01981e-05	OG0022689
Zm00001d025568	Cortex	Novel	4.93472e-05	OG0000956
Zm00001d028118	Cortex	Novel	4.87816e-05	OG0009807
Zm00001d048136	Cortex	Novel	4.55663e-05	OG0003781
Zm00001d047050	Cortex	Novel	4.54356e-05	OG0003198
Zm00001d043156	Cortex	Novel	4.40456e-05	OG0019203
Zm00001d017375	Cortex	Novel	4.22131e-05	OG0001569
Zm00001d046952	Cortex	Novel	3.99703e-05	OG0012457
Zm00001d051554	Cortex	Novel	3.97374e-05	OG0004958
Zm00001d035553	Cortex	Novel	3.90167e-05	OG0013773
Zm00001d017990	Cortex	Novel	3.88822e-05	OG0019666
Zm00001d048135	Cortex	Novel	3.8382e-05	OG0003781
Zm00001d043087	Cortex	Novel	3.68429e-05	OG0000618
Zm00001d032578	Cortex	Novel	3.59501e-05	OG0021594
Zm00001d037610	Cortex	Novel	3.41563e-05	OG0017591
Zm00001d043741	Cortex	Novel	3.28531e-05	OG0000451
Zm00001d012684	Cortex	Novel	3.24209e-05	OG0006230
Zm00001d029366	Cortex	Novel	3.16935e-05	OG0001753
Zm00001d046184	Cortex	Novel	3.09799e-05	OG0002837
Zm00001d020852	Cortex	Novel	2.96277e-05	OG0002236
Zm00001d018281	Cortex	Novel	2.86465e-05	OG0023329
Zm00001d020401	Cortex	Novel	2.70214e-05	OG0022654
Zm00001d037165	Cortex	Novel	2.64035e-05	OG0002244
Zm00001d042011	Cortex	Novel	2.58957e-05	OG0021574
Zm00001d048870	Cortex	Novel	2.55746e-05	OG0022836
Zm00001d039783	Cortex	Novel	2.51623e-05	OG0015329
Zm00001d038930	Cortex	Novel	2.43944e-05	OG0016394
Zm00001d023413	Cortex	Novel	2.41867e-05	OG0004522
Zm00001d034946	Cortex	Novel	2.34582e-05	OG0013780
Zm00001d025753	Cortex	Novel	2.34187e-05	OG0001138
Zm00001d045533	Cortex	Novel	2.33498e-05	OG0020652
Zm00001d023216	Cortex	Novel	2.23488e-05	OG0009922
Zm00001d007891	Cortex	Novel	2.15731e-05	OG0013858
Zm00001d023404	Cortex	Novel	2.15548e-05	OG0008927
Zm00001d024265	Cortex	Novel	2.04197e-05	OG0010246
Zm00001d034482	Cortex	Novel	1.97408e-05	OG0020075
Zm00001d022456	Cortex	Novel	1.9575e-05	OG0017339
Zm00001d024853	Cortex	Novel	1.95291e-05	OG0002210
Zm00001d020958	Cortex_like	Novel	0.00763375	OG0014254
Zm00001d052651	Cortex_like	Novel	0.00450474	OG0008132
Zm00001d037969	Cortex_like	Novel	0.00409849	OG0000106
Zm00001d022174	Cortex_like	Novel	0.00397612	OG0006521
GRMZM5G867512	Cortex_like	Novel	0.00373356	OG0005152
Zm00001d012081	Cortex_like	Novel	0.00363342	OG0023150
Zm00001d012080	Cortex_like	Novel	0.00298022	OG0013471
Zm00001d040029	Cortex_like	Novel	0.0028264	OG0017635
Zm00001d010434	Cortex_like	Novel	0.00265862	OG0000514
Zm00001d002035	Cortex_like	Novel	0.00230872	OG0016285
Zm00001d033683	Cortex_like	Novel	0.00212217	OG0008136
Zm00001d042114	Cortex_like	Novel	0.00206325	OG0009480
Zm00001d007831	Cortex_like	Novel	0.00202709	OG0016569
Zm00001d033186	Cortex_like	Novel	0.00198768	OG0006769
Zm00001d049179	Cortex_like	Novel	0.00198256	OG0017661
Zm00001d034427	Cortex_like	Novel	0.00191298	OG0000927
Zm00001d019312	Cortex_like	Novel	0.0018535	OG0002894
Zm00001d025873	Cortex_like	Novel	0.00183669	OG0020287
Zm00001d023395	Cortex_like	Novel	0.00168685	OG0009406
Zm00001d048558	Cortex_like	Novel	0.00168059	OG0010308
Zm00001d013642	Cortex_like	Novel	0.00155293	OG0006100
Zm00001d052485	Cortex_like	Novel	0.00148451	OG0006295
Zm00001d016708	Cortex_like	Novel	0.00140576	OG0019514
Zm00001d020984	Cortex_like	Novel	0.00134406	OG0002556
GRMZM5G838396	Cortex_like	Novel	0.00127994	OG0002833
Zm00001d014758	Cortex_like	Novel	0.0012781	OG0005398
Zm00001d039607	Cortex_like	Novel	0.00125616	OG0000045
Zm00001d016818	Cortex_like	Novel	0.00122954	OG0008916
GRMZM5G834666	Cortex_like	Novel	0.00110773	OG0010357
Zm00001d038453	Cortex_like	Novel	0.00108192	OG0003549
Zm00001d053684	Cortex_like	Novel	0.00103691	OG0004589
Zm00001d038065	Cortex_like	Novel	0.00102345	OG0005885
Zm00001d014887	Cortex_like	Novel	0.000979461	OG0008904
Zm00001d028474	Cortex_like	Novel	0.00095837	OG0008342
Zm00001d017292	Cortex_like	Novel	0.000950445	OG0019585
Zm00001d026431	Cortex_like	Novel	0.000940179	OG0007168
Zm00001d025018	Cortex_like	Novel	0.000918501	OG0002396
Zm00001d010617	Cortex_like	Novel	0.000894236	OG0016368
Zm00001d031257	Cortex_like	Novel	0.000848154	OG0021280
Zm00001d013612	Cortex_like	Novel	0.000843462	OG0000101
Zm00001d047253	Cortex_like	Novel	0.000838442	OG0001936
Zm00001d020702	Cortex_like	Novel	0.000746557	OG0021424
Zm00001d052619	Cortex_like	Novel	0.00073973	OG0005336
Zm00001d052041	Cortex_like	Novel	0.000734733	OG0002342
Zm00001d036918	Cortex_like	Novel	0.000695151	OG0020811
Zm00001d043752	Cortex_like	Novel	0.000674634	OG0004826
Zm00001d047124	Cortex_like	Novel	0.000644493	OG0004753
Zm00001d018383	Cortex_like	Novel	0.000599999	OG0004938
Zm00001d048191	Cortex_like	Novel	0.000588718	OG0000774
Zm00001d022569	Cortex_like	Novel	0.000573997	OG0005037
Zm00001d052335	Cortex_like	Novel	0.000542792	OG0003783
Zm00001d040375	Cortex_like	Novel	0.00053481	OG0002940
Zm00001d007045	Cortex_like	Novel	0.00053127	OG0003416
Zm00001d040880	Cortex_like	Novel	0.000526714	OG0015290
Zm00001d024522	Cortex_like	Novel	0.000518873	OG0004960
Zm00001d042842	Cortex_like	Novel	0.000516705	OG0011849
Zm00001d014947	Cortex_like	Novel	0.000500533	OG0015621
Zm00001d049059	Cortex_like	Novel	0.000472306	OG0005558
Zm00001d042035	Cortex_like	Novel	0.000468962	OG0002556
Zm00001d028966	Cortex_like	Novel	0.000464182	OG0008532
Zm00001d042386	Cortex_like	Novel	0.000459518	OG0004410
Zm00001d008716	Cortex_like	Novel	0.000438234	OG0000689
Zm00001d047116	Cortex_like	Novel	0.000428606	OG0001267
Zm00001d047663	Cortex_like	Novel	0.000408733	OG0006253
Zm00001d037492	Cortex_like	Novel	0.000387682	OG0000288
Zm00001d028368	Cortex_like	Novel	0.000375334	OG0003007
Zm00001d029872	Cortex_like	Novel	0.000366255	OG0001895
Zm00001d021736	Cortex_like	Novel	0.000354295	OG0021038
Zm00001d008595	Cortex_like	Novel	0.000338427	OG0003335
Zm00001d052375	Cortex_like	Novel	0.000336268	OG0014043
Zm00001d026412	Cortex_like	Novel	0.000329229	OG0022754
Zm00001d044533	Cortex_like	Novel	0.00032922	OG0003400
Zm00001d034319	Cortex_like	Novel	0.000317075	OG0003288
Zm00001d028917	Cortex_like	Novel	0.000300653	OG0019895
Zm00001d005791	Cortex_like	Novel	0.000300392	OG0000056
Zm00001d022510	Cortex_like	Novel	0.000299241	OG0011392
Zm00001d014366	Cortex_like	Novel	0.00029828	OG0000361
Zm00001d020400	Cortex_like	Novel	0.00029671	OG0016802
Zm00001d034356	Cortex_like	Novel	0.000279212	OG0000158
Zm00001d025771	Cortex_like	Novel	0.000248876	OG0009540
Zm00001d013553	Cortex_like	Novel	0.000247753	OG0020011
Zm00001d026415	Cortex_like	Novel	0.000241173	OG0006921
Zm00001d027546	Cortex_like	Novel	0.000229704	OG0001221
Zm00001d019593	Cortex_like	Novel	0.000228151	OG0016120
Zm00001d039936	Cortex_like	Novel	0.000217474	OG0000557
Zm00001d021599	Cortex_like	Novel	0.000213274	OG0000361
Zm00001d013461	Cortex_like	Novel	0.000213142	OG0008136
Zm00001d047115	Cortex_like	Novel	0.000196902	OG0001267
Zm00001d019279	Cortex_like	Novel	0.000195705	OG0005138
Zm00001d008295	Cortex_like	Novel	0.000195267	OG0000221
Zm00001d039643	Cortex_like	Novel	0.000193139	OG0021508
Zm00001d002191	Cortex_like	Novel	0.000191721	OG0006222
Zm00001d012276	Cortex_like	Novel	0.000190539	OG0000062
Zm00001d008961	Cortex_like	Novel	0.000183101	OG0001241
Zm00001d016274	Cortex_like	Novel	0.000180597	OG0001197
Zm00001d043650	Cortex_like	Novel	0.0001794	OG0004090
Zm00001d009803	Cortex_like	Novel	0.000170672	OG0009768
Zm00001d003725	Cortex_like	Novel	0.000170086	OG0000062
Zm00001d038460	Cortex_like	Novel	0.000169647	OG0003549
Zm00001d026642	Cortex_like	Novel	0.00016931	OG0004063
Zm00001d020585	Cortex_like	Novel	0.000167604	OG0000056
Zm00001d025406	Cortex_like	Novel	0.000165278	OG0000062
Zm00001d051008	Cortex_like	Novel	0.000164466	OG0000078
Zm00001d044008	Cortex_like	Novel	0.000163008	OG0019086
Zm00001d009765	Cortex_like	Novel	0.000161083	OG0008621
Zm00001d019045	Cortex_like	Novel	0.000160751	OG0000525
Zm00001d040003	Cortex_like	Novel	0.00015708	OG0015312
Zm00001d009567	Cortex_like	Novel	0.000155493	OG0016402
Zm00001d008266	Cortex_like	Novel	0.00015054	OG0001142
Zm00001d006950	Cortex_like	Novel	0.000147288	OG0012214
Zm00001d042730	Cortex_like	Novel	0.000146974	OG0000062
Zm00001d011125	Cortex_like	Novel	0.000146642	OG0008535
Zm00001d040422	Cortex_like	Novel	0.0001448	OG0018916
Zm00001d027394	Cortex_like	Novel	0.000143411	OG0000056
Zm00001d043443	Cortex_like	Novel	0.000139226	OG0004384
Zm00001d020195	Cortex_like	Novel	0.00013504	OG0009133
Zm00001d002546	Cortex_like	Novel	0.000134989	OG0000056
Zm00001d047087	Cortex_like	Novel	0.000134192	OG0014034
Zm00001d008843	Cortex_like	Novel	0.000133474	OG0002746
Zm00001d039624	Cortex_like	Novel	0.0001322	OG0001603
Zm00001d027888	Cortex_like	Novel	0.000125123	OG0019794
Zm00001d012064	Cortex_like	Novel	0.000124912	OG0004780
Zm00001d023593	Cortex_like	Novel	0.000120351	OG0010346
Zm00001d002132	Cortex_like	Novel	0.000119035	OG0022754
GRMZM5G800101	Cortex_like	Novel	0.000118823	OG0000388
Zm00001d032363	Cortex_like	Novel	0.000118786	OG0021225
Zm00001d004340	Cortex_like	Novel	0.000112324	OG0000892
Zm00001d041827	Cortex_like	Novel	0.000111104	OG0001737
Zm00001d039733	Cortex_like	Novel	0.000109337	OG0000056
Zm00001d051442	Cortex_like	Novel	0.000107946	OG0015777
Zm00001d040508	Cortex_like	Novel	0.000106132	OG0023207
Zm00001d041568	Cortex_like	Novel	0.000105457	OG0002512
Zm00001d003669	Cortex_like	Novel	0.000105449	OG0016185
Zm00001d033284	Cortex_like	Novel	0.000101986	OG0000419
Zm00001d002052	Cortex_like	Novel	0.00010196	OG0008596
Zm00001d012837	Cortex_like	Novel	0.000100749	OG0000525
Zm00001d013066	Cortex_like	Novel	9.61541e-05	OG0010117
Zm00001d021477	Cortex_like	Novel	9.10138e-05	OG0000056
Zm00001d017070	Cortex_like	Novel	9.07378e-05	OG0005062
Zm00001d008669	Cortex_like	Novel	8.67444e-05	OG0000056
Zm00001d038598	Cortex_like	Novel	8.26722e-05	OG0000773
Zm00001d039264	Cortex_like	Novel	8.15736e-05	OG0013354
Zm00001d007084	Cortex_like	Novel	8.09861e-05	OG0000133
Zm00001d016316	Cortex_like	Novel	7.69601e-05	OG0002941
Zm00001d002905	Cortex_like	Novel	7.60767e-05	OG0007426
Zm00001d051384	Cortex_like	Novel	7.50459e-05	OG0000499
Zm00001d031657	Cortex_like	Novel	7.47247e-05	OG0000778
Zm00001d045130	Cortex_like	Novel	7.39641e-05	OG0012223
Zm00001d043075	Cortex_like	Novel	7.39461e-05	OG0000374
Zm00001d023309	Cortex_like	Novel	7.18756e-05	OG0003177
Zm00001d020584	Cortex_like	Novel	7.06851e-05	OG0000056
Zm00001d044246	Cortex_like	Novel	6.96893e-05	OG0000525
Zm00001d047738	Cortex_like	Novel	6.94939e-05	OG0009739
Zm00001d010840	Cortex_like	Novel	6.61732e-05	OG0020431
Zm00001d030216	Cortex_like	Novel	6.43717e-05	OG0002940
Zm00001d021935	Cortex_like	Novel	6.38029e-05	OG0006369
Zm00001d041830	Cortex_like	Novel	6.2879e-05	OG0000106
Zm00001d045858	Cortex_like	Novel	6.18694e-05	OG0013350
Zm00001d052480	Cortex_like	Novel	6.08191e-05	OG0010324
Zm00001d003833	Cortex_like	Novel	6.0048e-05	OG0001484
Zm00001d029263	Cortex_like	Novel	5.9357e-05	OG0002207
Zm00001d003730	Cortex_like	Novel	5.92969e-05	OG0000062
Zm00001d048229	Cortex_like	Novel	5.87133e-05	OG0004220
Zm00001d000310	Cortex_like	Novel	5.83104e-05	OG0004077
Zm00001d035308	Cortex_like	Novel	5.59156e-05	OG0013900
Zm00001d038126	Cortex_like	Novel	5.58389e-05	OG0008530
Zm00001d002543	Cortex_like	Novel	5.55882e-05	OG0000056
Zm00001d001899	Cortex_like	Novel	5.45926e-05	OG0000377
Zm00001d047334	Cortex_like	Novel	5.33618e-05	OG0000325
Zm00001d015986	Cortex_like	Novel	5.30286e-05	OG0008605
Zm00001d052104	Cortex_like	Novel	5.18762e-05	OG0023329
Zm00001d015133	Cortex_like	Novel	5.13587e-05	OG0019351
Zm00001d010039	Cortex_like	Novel	5.02259e-05	OG0005249
Zm00001d012439	Cortex_like	Novel	5.02166e-05	OG0000056
Zm00001d027760	Cortex_like	Novel	4.96716e-05	OG0001380
Zm00001d028707	Cortex_like	Novel	4.93823e-05	OG0003495
Zm00001d026712	Cortex_like	Novel	4.77119e-05	OG0007424
Zm00001d031909	Cortex_like	Novel	4.5987e-05	OG0002150
Zm00001d047481	Cortex_like	Novel	4.52851e-05	OG0002669
Zm00001d004287	Cortex_like	Novel	4.47731e-05	OG0002049
Zm00001d017242	Cortex_like	Novel	4.43979e-05	OG0011587
Zm00001d053625	Cortex_like	Novel	4.28115e-05	OG0004062
Zm00001d009566	Cortex_like	Novel	4.24986e-05	OG0002400
Zm00001d017548	Cortex_like	Novel	4.17074e-05	OG0000078
Zm00001d023213	Cortex_like	Novel	4.13229e-05	OG0022728
Zm00001d022428	Cortex_like	Novel	4.07143e-05	OG0003369
Zm00001d049399	Cortex_like	Novel	4.04982e-05	OG0001395
Zm00001d043723	Cortex_like	Novel	4.04485e-05	OG0005550
Zm00001d014141	Cortex_like	Novel	3.94978e-05	OG0009003
GRMZM5G804708	Cortex_like	Novel	3.92713e-05	OG0013308
Zm00001d046834	Cortex_like	Novel	3.88929e-05	OG0020846
Zm00001d016895	Cortex_like	Novel	3.72979e-05	OG0015732
Zm00001d051048	Cortex_like	Novel	3.67605e-05	OG0000493
Zm00001d029708	Cortex_like	Novel	3.62288e-05	OG0010308
Zm00001d037684	Cortex_like	Novel	3.57993e-05	OG0016330
Zm00001d043868	Cortex_like	Novel	3.47654e-05	OG0019099
Zm00001d018988	Cortex_like	Novel	3.3691e-05	OG0014847
Zm00001d033846	Cortex_like	Novel	3.36629e-05	OG0020036
Zm00001d021300	Cortex_like	Novel	3.33334e-05	OG0000525
Zm00001d025247	Cortex_like	Novel	3.22004e-05	OG0006665
Zm00001d036565	Endodermal_Initials	Novel	0.00498601	OG0023089
Zm00001d036708	Endodermal_Initials	Novel	0.00483665	OG0002002
Zm00001d023994	Endodermal_Initials	Novel	0.00478882	OG0003948
Zm00001d027595	Endodermal_Initials	Novel	0.00451449	OG0005336
Zm00001d018410	Endodermal_Initials	Novel	0.00413059	OG0001912
Zm00001d048368	Endodermal_Initials	Novel	0.00299159	OG0000832
Zm00001d036567	Endodermal_Initials	Novel	0.00222308	OG0023089
Zm00001d018211	Endodermal_Initials	Novel	0.00200366	OG0000855
Zm00001d022463	Endodermal_Initials	Novel	0.00196331	OG0002622
Zm00001d044442	Endodermal_Initials	Novel	0.00181302	OG0000291
Zm00001d043523	Endodermal_Initials	Novel	0.00173139	OG0000614
Zm00001d009848	Endodermal_Initials	Novel	0.00153868	OG0002614
Zm00001d009000	Endodermal_Initials	Novel	0.00147979	OG0001792
Zm00001d036568	Endodermal_Initials	Novel	0.00129119	OG0002565
Zm00001d010736	Endodermal_Initials	Novel	0.00123517	OG0000028
Zm00001d054065	Endodermal_Initials	Novel	0.00109223	OG0001806
Zm00001d043621	Endodermal_Initials	Novel	0.00108774	OG0000861
Zm00001d028714	Endodermal_Initials	Novel	0.00104106	OG0008741
Zm00001d047707	Endodermal_Initials	Novel	0.000950787	OG0003151
Zm00001d029359	Endodermal_Initials	Novel	0.000938592	OG0000028
Zm00001d017381	Endodermal_Initials	Novel	0.000922019	OG0010042
Zm00001d012909	Endodermal_Initials	Novel	0.00091972	OG0004446
Zm00001d002899	Endodermal_Initials	Novel	0.000878428	OG0020399
Zm00001d018466	Endodermal_Initials	Novel	0.000843928	OG0010736
Zm00001d051419	Endodermal_Initials	Novel	0.000818254	OG0015772
Zm00001d006287	Endodermal_Initials	Novel	0.00080589	OG0002550
Zm00001d018627	Endodermal_Initials	Novel	0.00080187	OG0004107
Zm00001d044159	Endodermal_Initials	Novel	0.000801206	OG0000619
Zm00001d014969	Endodermal_Initials	Novel	0.000787218	OG0001806
Zm00001d031640	Endodermal_Initials	Novel	0.00078049	OG0001454
Zm00001d009657	Endodermal_Initials	Novel	0.000776557	OG0000377
Zm00001d052075	Endodermal_Initials	Novel	0.00075947	OG0001017
Zm00001d012598	Endodermal_Initials	Novel	0.000740495	OG0003344
Zm00001d026426	Endodermal_Initials	Novel	0.00069346	OG0008808
Zm00001d022421	Endodermal_Initials	Novel	0.000672934	OG0016671
Zm00001d013873	Endodermal_Initials	Novel	0.000658061	OG0000071
Zm00001d028167	Endodermal_Initials	Novel	0.000651622	OG0000774
Zm00001d049552	Endodermal_Initials	Novel	0.000615092	OG0017486
Zm00001d026254	Endodermal_Initials	Novel	0.000593733	OG0000924
Zm00001d043736	Endodermal_Initials	Novel	0.000592106	OG0013427
Zm00001d014082	Endodermal_Initials	Novel	0.000579949	OG0001290
Zm00001d039106	Endodermal_Initials	Novel	0.000552363	OG0001301
Zm00001d006651	Endodermal_Initials	Novel	0.000508644	OG0000254
Zm00001d009653	Endodermal_Initials	Novel	0.000505346	OG0000377
Zm00001d013222	Endodermal_Initials	Novel	0.000482778	OG0001100
Zm00001d021652	Endodermal_Initials	Novel	0.000475547	OG0001185
Zm00001d039842	Endodermal_Initials	Novel	0.000454198	OG0016644
Zm00001d047186	Endodermal_Initials	Novel	0.00040703	OG0002811
Zm00001d051929	Endodermal_Initials	Novel	0.00040541	OG0000832
Zm00001d022228	Endodermal_Initials	Novel	0.000404301	OG0021090
Zm00001d022517	Endodermal_Initials	Novel	0.000403075	OG0000378
Zm00001d004839	Endodermal_Initials	Novel	0.000392118	OG0001061
Zm00001d032181	Endodermal_Initials	Novel	0.000389453	OG0001328
Zm00001d035201	Endodermal_Initials	Novel	0.000371835	OG0001127
Zm00001d014679	Endodermal_Initials	Novel	0.000325338	OG0003646
Zm00001d051799	Endodermal_Initials	Novel	0.000325123	OG0001299
Zm00001d018696	Endodermal_Initials	Novel	0.000323175	OG0009381
Zm00001d045889	Endodermal_Initials	Novel	0.000308015	OG0003373
Zm00001d041489	Endodermal_Initials	Novel	0.000307518	OG0023024
Zm00001d047271	Endodermal_Initials	Novel	0.000298984	OG0004492
Zm00001d040244	Endodermal_Initials	Novel	0.000284505	OG0009920
Zm00001d017047	Endodermal_Initials	Novel	0.000278247	OG0001374
Zm00001d046330	Endodermal_Initials	Novel	0.000274763	OG0006934
Zm00001d003672	Endodermal_Initials	Novel	0.000257899	OG0001208
Zm00001d004855	Endodermal_Initials	Novel	0.000255883	OG0000064
Zm00001d043242	Endodermal_Initials	Novel	0.000250562	OG0019191
Zm00001d006064	Endodermal_Initials	Novel	0.000243998	OG0003604
Zm00001d007940	Endodermal_Initials	Novel	0.000233933	OG0000710
Zm00001d036293	Endodermal_Initials	Novel	0.000225601	OG0003618
Zm00001d038523	Endodermal_Initials	Novel	0.000218764	OG0000375
Zm00001d046778	Endodermal_Initials	Novel	0.000204826	OG0015177
Zm00001d021192	Endodermal_Initials	Novel	0.000199529	OG0003293
Zm00001d043223	Endodermal_Initials	Novel	0.000196006	OG0023029
Zm00001d028249	Endodermal_Initials	Novel	0.000186365	OG0019832
Zm00001d053004	Endodermal_Initials	Novel	0.000185348	OG0000316
Zm00001d014888	Endodermal_Initials	Novel	0.000183969	OG0020888
Zm00001d053636	Endodermal_Initials	Novel	0.000171991	OG0002099
Zm00001d038531	Endodermal_Initials	Novel	0.000171403	OG0006430
Zm00001d043652	Endodermal_Initials	Novel	0.000171143	OG0001826
Zm00001d002704	Endodermal_Initials	Novel	0.000168693	OG0001041
Zm00001d043318	Endodermal_Initials	Novel	0.000168271	OG0004077
Zm00001d045069	Endodermal_Initials	Novel	0.000162464	OG0001717
Zm00001d010016	Endodermal_Initials	Novel	0.000162418	OG0000746
Zm00001d028486	Endodermal_Initials	Novel	0.000159045	OG0019853
Zm00001d053632	Endodermal_Initials	Novel	0.000158626	OG0002099
Zm00001d034855	Endodermal_Initials	Novel	0.000157525	OG0000821
Zm00001d014467	Endodermal_Initials	Novel	0.000155183	OG0000492
Zm00001d013230	Endodermal_Initials	Novel	0.000152746	OG0000796
Zm00001d023887	Endodermal_Initials	Novel	0.000151584	OG0000413
Zm00001d012211	Endodermal_Initials	Novel	0.000151032	OG0000695
Zm00001d039952	Endodermal_Initials	Novel	0.000150708	OG0003955
Zm00001d029124	Endodermal_Initials	Novel	0.000147674	OG0001158
Zm00001d047470	Endodermal_Initials	Novel	0.00014651	OG0001920
Zm00001d028830	Endodermal_Initials	Novel	0.000146503	OG0001320
Zm00001d016491	Endodermal_Initials	Novel	0.000138524	OG0006226
Zm00001d011225	Endodermal_Initials	Novel	0.000138201	OG0013398
Zm00001d024511	Endodermal_Initials	Novel	0.0001353	OG0001445
Zm00001d034107	Endodermal_Initials	Novel	0.000133315	OG0000796
Zm00001d048201	Endodermal_Initials	Novel	0.000132733	OG0001880
Zm00001d034731	Endodermal_Initials	Novel	0.000128966	OG0001440
Zm00001d010049	Endodermal_Initials	Novel	0.000126855	OG0006233
Zm00001d039615	Endodermal_Initials	Novel	0.000121537	OG0000295
Zm00001d016031	Endodermal_Initials	Novel	0.000119882	OG0001265
Zm00001d015468	Endodermal_Initials	Novel	0.000118681	OG0019386
Zm00001d020170	Endodermal_Initials	Novel	0.000116762	OG0004496
Zm00001d042313	Endodermal_Initials	Novel	0.00011512	OG0013475
Zm00001d037732	Endodermal_Initials	Novel	0.000114851	OG0004105
Zm00001d003271	Endodermal_Initials	Novel	0.000113121	OG0013736
Zm00001d033909	Endodermal_Initials	Novel	0.000110618	OG0020042
Zm00001d007083	Endodermal_Initials	Novel	0.000109441	OG0001583
Zm00001d002850	Endodermal_Initials	Novel	0.000105788	OG0004063
Zm00001d044254	Endodermal_Initials	Novel	0.000105273	OG0013398
Zm00001d022390	Endodermal_Initials	Novel	0.000101586	OG0008751
Zm00001d018206	Endodermal_Initials	Novel	9.98404e-05	OG0017630
Zm00001d021020	Endodermal_Initials	Novel	9.29203e-05	OG0003604
Zm00001d027816	Endodermal_Initials	Novel	9.26943e-05	OG0009375
Zm00001d044021	Endodermal_Initials	Novel	8.98785e-05	OG0000815
Zm00001d002261	Endodermal_Initials	Novel	8.95465e-05	OG0000767
Zm00001d034207	Endodermal_Initials	Novel	8.87244e-05	OG0001501
Zm00001d003707	Endodermal_Initials	Novel	8.70106e-05	OG0016183
Zm00001d017238	Endodermal_Initials	Novel	8.27558e-05	OG0023342
Zm00001d039695	Endodermal_Initials	Novel	8.11309e-05	OG0009124
Zm00001d046234	Endodermal_Initials	Novel	8.11128e-05	OG0007500
Zm00001d004048	Endodermal_Initials	Novel	8.0684e-05	OG0002866
Zm00001d048117	Endodermal_Initials	Novel	7.94954e-05	OG0005913
Zm00001d024981	Endodermal_Initials	Novel	7.84649e-05	OG0014096
Zm00001d051149	Endodermal_Initials	Novel	7.7825e-05	OG0001983
GRMZM5G845244	Endodermal_Initials	Novel	7.69476e-05	OG0018790
Zm00001d042664	Endodermal_Initials	Novel	7.69178e-05	OG0001789
Zm00001d005421	Endodermal_Initials	Novel	7.67499e-05	OG0000292
Zm00001d053442	Endodermal_Initials	Novel	7.55789e-05	OG0001490
Zm00001d050921	Endodermal_Initials	Novel	7.4246e-05	OG0001374
Zm00001d009509	Endodermal_Initials	Novel	7.41625e-05	OG0003476
Zm00001d038066	Endodermal_Initials	Novel	7.38684e-05	OG0002459
Zm00001d015025	Endodermal_Initials	Novel	7.33555e-05	OG0009937
Zm00001d005753	Endodermal_Initials	Novel	7.06776e-05	OG0017514
Zm00001d049916	Endodermal_Initials	Novel	6.91271e-05	OG0010945
Zm00001d003865	Endodermal_Initials	Novel	6.90429e-05	OG0000202
Zm00001d000120	Endodermal_Initials	Novel	6.66224e-05	OG0002565
Zm00001d027678	Endodermal_Initials	Novel	6.57431e-05	OG0019768
Zm00001d052069	Endodermal_Initials	Novel	6.5415e-05	OG0023288
Zm00001d010649	Endodermal_Initials	Novel	6.46414e-05	OG0020564
Zm00001d003181	Endodermal_Initials	Novel	6.29137e-05	OG0002623
Zm00001d031332	Endodermal_Initials	Novel	6.18988e-05	OG0000643
Zm00001d051543	Endodermal_Initials	Novel	6.12197e-05	OG0000905
Zm00001d025402	Endodermal_Initials	Novel	6.03783e-05	OG0016183
Zm00001d043420	Endodermal_Initials	Novel	5.90583e-05	OG0001490
Zm00001d016185	Endodermal_Initials	Novel	5.84565e-05	OG0019430
Zm00001d023901	Endodermal_Initials	Novel	5.70377e-05	OG0002315
Zm00001d010798	Endodermal_Initials	Novel	5.53055e-05	OG0005181
Zm00001d048253	Endodermal_Initials	Novel	5.48918e-05	OG0001378
Zm00001d027527	Endodermal_Initials	Novel	5.34904e-05	OG0001378
Zm00001d018056	Endodermal_Initials	Novel	5.27956e-05	OG0005213
Zm00001d029174	Endodermal_Initials	Novel	5.26643e-05	OG0003049
Zm00001d022111	Endodermal_Initials	Novel	5.07332e-05	OG0001445
Zm00001d020395	Endodermal_Initials	Novel	4.95322e-05	OG0004562
Zm00001d036787	Endodermal_Initials	Novel	4.9339e-05	OG0007086
Zm00001d029947	Endodermal_Initials	Novel	4.87485e-05	OG0010904
Zm00001d046029	Endodermal_Initials	Novel	4.83161e-05	OG0020751
Zm00001d034751	Endodermal_Initials	Novel	4.69384e-05	OG0003769
Zm00001d049657	Endodermal_Initials	Novel	4.68438e-05	OG0016927
Zm00001d013786	Endodermal_Initials	Novel	4.5723e-05	OG0002561
Zm00001d046995	Endodermal_Initials	Novel	4.24873e-05	OG0007892
Zm00001d038682	Endodermal_Initials	Novel	4.17978e-05	OG0023123
Zm00001d037477	Endodermal_Initials	Novel	4.12927e-05	OG0013828
Zm00001d009224	Endodermal_Initials	Novel	3.92976e-05	OG0008257
Zm00001d017419	Endodermal_Initials	Novel	3.84643e-05	OG0000590
Zm00001d003485	Endodermal_Initials	Novel	3.71924e-05	OG0020250
Zm00001d049683	Endodermal_Initials	Novel	3.60885e-05	OG0016682
Zm00001d053661	Endodermal_Initials	Novel	3.41867e-05	OG0011951
Zm00001d046476	Endodermal_Initials	Novel	3.4083e-05	OG0000212
Zm00001d018883	Endodermal_Initials	Novel	3.39452e-05	OG0004665
Zm00001d050705	Endodermal_Initials	Novel	3.35752e-05	OG0013730
Zm00001d036137	Endodermal_Initials	Novel	3.33773e-05	OG0004205
Zm00001d034130	Endodermal_Initials	Novel	3.33104e-05	OG0016552
Zm00001d017915	Endodermal_Initials	Novel	3.30004e-05	OG0006915
Zm00001d027929	Endodermal_Initials	Novel	3.23475e-05	OG0013591
Zm00001d018024	Endodermal_Initials	Novel	3.20913e-05	OG0005387
Zm00001d012729	Endodermal_Initials	Novel	3.14249e-05	OG0001813
Zm00001d035115	Endodermal_Initials	Novel	3.12795e-05	OG0002208
Zm00001d014971	Endodermal_Initials	Novel	3.03649e-05	OG0003118
Zm00001d039974	Endodermal_Initials	Novel	3.0088e-05	OG0011154
Zm00001d017009	Endodermal_Initials	Novel	2.97342e-05	OG0000162
Zm00001d009309	Endodermal_Initials	Novel	2.95534e-05	OG0013884
Zm00001d044812	Endodermal_Initials	Novel	2.92402e-05	OG0005387
Zm00001d048547	Endodermal_Initials	Novel	2.88501e-05	OG0000161
Zm00001d046444	Endodermal_Initials	Novel	2.86967e-05	OG0001865
Zm00001d041850	Endodermal_Initials	Novel	2.80121e-05	OG0014095
Zm00001d016947	Endodermal_Initials	Novel	2.74926e-05	OG0017678
Zm00001d036241	Endodermal_Initials	Novel	2.66626e-05	OG0001265
Zm00001d048090	Endodermal_Initials	Novel	2.66424e-05	OG0002335
Zm00001d048837	Endodermal_Initials	Novel	2.6261e-05	OG0000827
Zm00001d039790	Endodermal_Initials	Novel	2.55386e-05	OG0000062
Zm00001d012254	Endodermal_Initials	Novel	2.54786e-05	OG0001789
Zm00001d047472	Endodermal_Initials	Novel	2.51888e-05	OG0003049
Zm00001d018491	Endodermal_Initials	Novel	2.4829e-05	OG0019715
Zm00001d047677	Endodermal_Initials	Novel	2.45712e-05	OG0001320
Zm00001d004007	Endodermal_Initials	Novel	2.43198e-05	OG0008143
Zm00001d013056	Endodermal_Initials	Novel	2.35451e-05	OG0002667
Zm00001d034588	Endodermal_Initials	Novel	2.33147e-05	OG0002342
Zm00001d049606	Endodermis1	Novel	0.00938158	OG0015225
Zm00001d019069	Endodermis1	Novel	0.00761634	OG0006651
Zm00001d050168	Endodermis1	Novel	0.00516479	OG0010250
Zm00001d040298	Endodermis1	Novel	0.00467739	OG0001201
Zm00001d020794	Endodermis1	Novel	0.00454437	OG0001379
Zm00001d027500	Endodermis1	Novel	0.00371557	OG0001030
Zm00001d044930	Endodermis1	Novel	0.00350676	OG0014166
Zm00001d051611	Endodermis1	Novel	0.00329208	OG0019642
Zm00001d035211	Endodermis1	Novel	0.00314624	OG0007689
Zm00001d050811	Endodermis1	Novel	0.00290707	OG0020778
Zm00001d053897	Endodermis1	Novel	0.00287651	OG0000125
Zm00001d045729	Endodermis1	Novel	0.00282184	OG0013846
Zm00001d002897	Endodermis1	Novel	0.00263965	OG0013770
Zm00001d035662	Endodermis1	Novel	0.0022853	OG0007174
Zm00001d020425	Endodermis1	Novel	0.00198236	OG0014905
Zm00001d017014	Endodermis1	Novel	0.0018195	OG0000162
Zm00001d031773	Endodermis1	Novel	0.00177529	OG0001195
Zm00001d005895	Endodermis1	Novel	0.00170899	OG0016817
Zm00001d052191	Endodermis1	Novel	0.00148712	OG0001379
Zm00001d030345	Endodermis1	Novel	0.00147625	OG0021506
Zm00001d037343	Endodermis1	Novel	0.00144406	OG0001315
Zm00001d034560	Endodermis1	Novel	0.00138433	OG0020081
Zm00001d046947	Endodermis1	Novel	0.00129088	OG0016516
Zm00001d019563	Endodermis1	Novel	0.00123631	OG0000292
Zm00001d033747	Endodermis1	Novel	0.00117396	OG0000500
Zm00001d032324	Endodermis1	Novel	0.0010956	OG0000407
Zm00001d003659	Endodermis1	Novel	0.000943397	OG0000690
Zm00001d008325	Endodermis1	Novel	0.000902127	OG0001201
Zm00001d015917	Endodermis1	Novel	0.000841341	OG0003313
Zm00001d015569	Endodermis1	Novel	0.000654964	OG0000288
Zm00001d029543	Endodermis1	Novel	0.000649004	OG0002679
Zm00001d037297	Endodermis1	Novel	0.000587765	OG0003581
Zm00001d014166	Endodermis1	Novel	0.000531713	OG0006299
Zm00001d008620	Endodermis1	Novel	0.000514723	OG0004805
Zm00001d043737	Endodermis1	Novel	0.000475068	OG0005481
Zm00001d027330	Endodermis1	Novel	0.000420874	OG0019737
Zm00001d052371	Endodermis1	Novel	0.000385091	OG0000618
Zm00001d052372	Endodermis1	Novel	0.000372267	OG0000618
Zm00001d049815	Endodermis1	Novel	0.000329575	OG0004105
Zm00001d052172	Endodermis1	Novel	0.000328905	OG0014166
Zm00001d048311	Endodermis1	Novel	0.000301423	OG0001918
Zm00001d015912	Endodermis1	Novel	0.000286429	OG0003173
Zm00001d052336	Endodermis1	Novel	0.000251418	OG0003783
Zm00001d027938	Endodermis1	Novel	0.00023662	OG0006728
Zm00001d020345	Endodermis1	Novel	0.000226308	OG0000422
Zm00001d020025	Endodermis1	Novel	0.000224239	OG0005853
Zm00001d017008	Endodermis1	Novel	0.000200811	OG0019551
Zm00001d014074	Endodermis1	Novel	0.00019569	OG0001321
Zm00001d030339	Endodermis1	Novel	0.000178064	OG0001113
Zm00001d003657	Endodermis1	Novel	0.000177129	OG0013731
Zm00001d009579	Endodermis1	Novel	0.00017137	OG0001732
Zm00001d004972	Endodermis1	Novel	0.000163657	OG0003287
Zm00001d029389	Endodermis1	Novel	0.000162235	OG0007138
Zm00001d040171	Endodermis1	Novel	0.000151912	OG0008442
Zm00001d046112	Endodermis1	Novel	0.000148113	OG0007010
Zm00001d012242	Endodermis1	Novel	0.000146604	OG0005190
Zm00001d035916	Endodermis1	Novel	0.000144736	OG0001498
Zm00001d007271	Endodermis1	Novel	0.00013243	OG0014067
Zm00001d053706	Endodermis1	Novel	0.000126736	OG0001540
Zm00001d014794	Endodermis1	Novel	0.000123993	OG0003304
Zm00001d021433	Endodermis1	Novel	0.000123176	OG0003053
Zm00001d039283	Endodermis1	Novel	0.000121602	OG0013350
Zm00001d047779	Endodermis1	Novel	0.000118917	OG0000596
Zm00001d011813	Endodermis1	Novel	0.000116632	OG0019313
[truncated: 1,302 more rows]

## Sheet: Maize_SVM
Marker_Genes	Clusters	Novel	SVM_values	Orthogroup
[truncated: 1,830 more rows]

[truncated: 6 more sheets: Rice_Seurat, Rice_SHAP, Rice_SVM, Tom_Seurat, Tom_SHAP, Tom_SVM]
