# Supplementary material for: Cross-species single-cell annotation with orthologous marker gene groups
Source: Research Square preprint supplement (doi:10.21203/rs.3.rs-3079082/v1), 2023-06-26
Supplement: Supplementary file 6 [file 904fe73aa4335d1d72c9afe3.xlsx]

## Sheet: Seurat_integration_19Clusters
Table S1: Seurat integration with 19 clusters
seurat_clusters	cellType	Freq	Percent	Percent_rescaled
0	Exodermis_OSA	873	16.263	20.8254
0	Phloem_ZMA	718	13.3756	17.1279			Note: Percent_rescaled refers to the process of eliminating cell types that contribute less than 4% of the total
0	Stele_ZMA	1095	20.3987	26.1212			Note: in cellType column, OSA = Rice, ZMA = Maize, ATH = Arabidopsis
0	Stele/Pith_ZMA	492	9.16542	11.7366
0	UnknownA_OSA	263	4.8994	6.27385
0	UnknownC_OSA	751	13.9903	17.9151
1	Atrichoblast_OSA	865	17.9834	25.3368
1	EMC_OSA	2034	42.2869	59.5782
1	Epidermis_ZMA	260	5.40541	7.6157
1	Trichoblast_OSA	255	5.30146	7.46924
2	Cortex_ATH	200	4.39947	5.07357
2	Cortex_like_OSA	276	6.07127	7.00152
2	Cortex_like_ZMA	344	7.56709	8.72653
2	Cortex_OSA	1586	34.8878	40.2334
2	Cortex_ZMA	815	17.9278	20.6748
2	UnknownA_OSA	721	15.8601	18.2902
3	Cortex_like_ZMA	380	10.5497	14.786
3	EMC_OSA	398	11.0494	15.4864
3	Root_cap_ATH	259	7.19045	10.0778
3	Stele_OSA	539	14.9639	20.9728
3	UnknownA_OSA	516	14.3254	20.0778
3	UnknownB_OSA	478	13.2704	18.5992
4	Atrichoblast_ATH	150	4.13907	5.41712
4	Endodermis_like_OSA	1348	37.1965	48.6818
4	Meristem_OSA	174	4.80132	6.28386
4	Stele_ZMA	525	14.4868	18.9599
4	Stele/Pith_ZMA	333	9.18874	12.026
4	UnknownD_OSA	239	6.59492	8.63127
5	Endodermal_Initials_ZMA	662	21.8266	28.0985
5	Endodermis_OSA	220	7.25354	9.33786
5	Meristem_OSA	650	21.4309	27.5891
5	Stele_ATH	270	8.90208	11.4601
5	UnknownB_OSA	554	18.2657	23.5144
6	Endodermal_Initials_ZMA	156	5.19135	6.16357
6	Exodermis_OSA	1790	59.5674	70.723
6	Meristem_Endocortex_ATH	370	12.3128	14.6187
6	Stele/Pith_ZMA	215	7.15474	8.49467
7	Trichoblast_ATH	604	20.1737	22.5879
7	Trichoblast_OSA	2070	69.1383	77.4121
8	Endodermal_Initials_ZMA	466	19.6707	22.2222
8	Meristem_OSA	1123	47.404	53.5527
8	Phloem_ZMA	118	4.981	5.62709
8	Stele_ATH	261	11.0173	12.4464
8	Xylem_OSA	129	5.44534	6.15165
9	Atrichoblast_ATH	217	9.00415	11.4512
9	Cortex_ZMA	1080	44.8133	56.9921
9	PutativeRootcap_OSA	598	24.8133	31.5567
10	Atrichoblast_ATH	113	4.92589	6.27081
10	Cortex_like_ZMA	394	17.1752	21.8646
10	Cortex_ZMA	244	10.6364	13.5405
10	Endodermal_Initials_ZMA	275	11.9878	15.2608
10	Epidermis_ZMA	246	10.7236	13.6515
10	Meristem_OSA	530	23.1037	29.4118
11	Endodermis_ATH	377	17.6416	19.1565
11	Endodermis_OSA	550	25.737	27.9472
11	Meristem_Endocortex_ATH	354	16.5653	17.9878
11	Stele/Pith_ZMA	516	24.146	26.2195
11	UnknownD_OSA	171	8.00187	8.68902
12	Cortex_like_OSA	395	20.2046	24.3677
12	Cortex_OSA	96	4.91049	5.92227
12	Cortex_ZMA	376	19.2327	23.1956
12	Endodermis_like_OSA	175	8.95141	10.7958
12	Stele_OSA	210	10.7417	12.955
12	Stele/Pith_ZMA	168	8.59335	10.364
12	Trichoblast_ATH	104	5.31969	6.41579
12	UnknownC_OSA	97	4.96164	5.98396
13	Atrichoblast_ATH	143	8.06998	11.5137
13	Cortex_ZMA	145	8.18284	11.6747
13	Meristem_Endocortex_ATH	121	6.82844	9.74235
13	Stele_ATH	135	7.61851	10.8696
13	Stele_ZMA	601	33.9165	48.3897
13	Stele/Pith_ZMA	97	5.47404	7.80998
14	Endodermis_ZMA	886	51.9953	56.2183
14	Phloem_ATH	149	8.74413	9.45431
14	Phloem_OSA	541	31.7488	34.3274
15	Meristem_OSA	93	6.11038	6.89911
15	Pericycle_OSA	627	41.1958	46.5134
15	Phloem_ZMA	215	14.1261	15.9496
15	Stele_ATH	219	14.389	16.2463
15	Stele_ZMA	194	12.7464	14.3917
16	Xylem_ATH	194	21.3656	23.6585
16	Xylem_OSA	339	37.3348	41.3415
16	Xylem_ZMA	287	31.6079	35
17	Initials_ZMA	96	11.4695	13.0258
17	Meristem_OSA	451	53.8829	61.194
17	QC_ZMA	129	15.4122	17.5034
17	Root_cap_ATH	61	7.28793	8.2768
18	Stele_OSA	114	14.4121	17.2466
18	UnknownC_OSA	139	17.5727	21.0287
18	Xylem_like_OSA	408	51.5803	61.7247

## Sheet: Seurat_intagration_30Clusters
Table S1: Seurat integration with 30 clusters.
seurat_clusters	cellType	Freq	Percent	Percent_rescaled
0	EMC_OSA	407	14.3816	18.5506
0	Endodermal_Initials_ZMA	256	9.04594	11.6682			Note: Percent_rescaled refers to the process of eliminating cell types that contribute less than 4% of the total
0	Epidermis_ZMA	117	4.13428	5.33273			Note: in cellType column, OSA = Rice, ZMA = Maize, ATH = Arabidopsis
0	Meristem_OSA	154	5.4417	7.01914
0	Root_cap_ATH	152	5.37102	6.92799
0	Unknown_ATH	141	4.98233	6.42662
0	UnknownA_OSA	131	4.62898	5.97083
0	UnknownB_OSA	836	29.5406	38.1039
1	Trichoblast_ATH	599	20.4646	22.6808
1	Trichoblast_OSA	2042	69.7643	77.3192
2	Cortex_like_OSA	105	4.1502	5.2161
2	Cortex_ZMA	154	6.08696	7.65027
2	EMC_OSA	110	4.34783	5.46448
2	Stele_OSA	162	6.40316	8.04769
2	Stele_ZMA	374	14.7826	18.5792
2	Stele/Pith_ZMA	370	14.6245	18.3805
2	UnknownA_OSA	321	12.6877	15.9463
2	UnknownC_OSA	417	16.4822	20.7154
3	Atrichoblast_ATH	222	8.7747	11.408
3	Cortex_ZMA	1125	44.4664	57.8109
3	PutativeRootcap_OSA	599	23.6759	30.7811
4	Atrichoblast_OSA	584	24.0527	27.1502
4	EMC_OSA	1122	46.2109	52.1618
4	Stele_ATH	120	4.94234	5.5788
4	Stele_ZMA	111	4.57166	5.16039
4	Trichoblast_OSA	214	8.81384	9.94886
5	Atrichoblast_ATH	144	6.05551	7.96901
5	Endodermis_like_OSA	497	20.8999	27.5042
5	Meristem_OSA	160	6.72834	8.85445
5	Stele_ATH	104	4.37342	5.7554
5	Stele_ZMA	533	22.4138	29.4964
5	Stele/Pith_ZMA	239	10.0505	13.2263
5	Trichoblast_ATH	130	5.46678	7.19424
6	Exodermis_OSA	805	33.3886	37.1824
6	Phloem_ZMA	547	22.6877	25.2656
6	Stele_ZMA	425	17.6275	19.6305
6	Stele/Pith_ZMA	129	5.35048	5.95843
6	UnknownC_OSA	134	5.55786	6.18938
6	UnknownD_OSA	125	5.18457	5.77367
7	Endodermal_Initials_ZMA	471	20.5947	23.2249
7	Meristem_OSA	1051	45.9554	51.8245
7	Phloem_ZMA	117	5.11587	5.76923
7	Stele_ATH	261	11.4123	12.8698
7	Xylem_OSA	128	5.59685	6.31164
8	Atrichoblast_ATH	95	4.38799	5.34308
8	Cortex_like_ZMA	401	18.5219	22.5534
8	Root_cap_ATH	262	12.1016	14.7357
8	Stele_OSA	481	22.2171	27.0529
8	UnknownA_OSA	402	18.5681	22.6097
8	UnknownB_OSA	137	6.32794	7.70529
9	Atrichoblast_ATH	110	4.9195	5.92992
9	Cortex_like_ZMA	391	17.4866	21.0782
9	Cortex_ZMA	244	10.9123	13.1536
9	Endodermal_Initials_ZMA	251	11.2254	13.531
9	Epidermis_ZMA	246	11.0018	13.2615
9	Meristem_OSA	521	23.3005	28.0863
9	Root_cap_ATH	92	4.11449	4.95957
10	Atrichoblast_OSA	287	12.9221	14.9869
10	Cortex_ATH	179	8.05943	9.34726
10	Cortex_Initials_ZMA	148	6.66367	7.72846
10	Cortex_ZMA	125	5.6281	6.52742
10	EMC_OSA	806	36.29	42.0888
10	Epidermis_ZMA	260	11.7064	13.577
10	Trichoblast_ATH	110	4.95272	5.74413
11	Cortex_like_OSA	400	19.0204	22.409
11	Cortex_OSA	199	9.46267	11.1485
11	Cortex_ZMA	453	21.5407	25.3782
11	Endodermis_like_OSA	174	8.27389	9.7479
11	Stele_OSA	357	16.9757	20
11	Trichoblast_ATH	103	4.89777	5.77031
11	UnknownC_OSA	99	4.70756	5.54622
12	Cortex_ATH	134	6.54297	6.71343
12	Cortex_like_OSA	132	6.44531	6.61323
12	Cortex_like_ZMA	245	11.9629	12.2745
12	Cortex_OSA	582	28.418	29.1583
12	Cortex_ZMA	554	27.0508	27.7555
12	UnknownA_OSA	349	17.041	17.485
13	Endodermis_ATH	327	18.3708	19.6751
13	Endodermis_OSA	554	31.1236	33.3333
13	Meristem_Endocortex_ATH	263	14.7753	15.8243
13	Stele/Pith_ZMA	518	29.1011	31.1673
14	Meristem_OSA	93	5.52913	6.23742
14	Pericycle_OSA	628	37.3365	42.1194
14	Phloem_ZMA	316	18.7872	21.1938
14	Stele_ATH	222	13.1986	14.8893
14	Stele_ZMA	232	13.7931	15.56
15	Cortex_ZMA	132	8.0292	9.09091
15	Endodermal_Initials_ZMA	137	8.33333	9.43526
15	Exodermis_OSA	613	37.2871	42.2176
15	Meristem_Endocortex_ATH	351	21.3504	24.1736
15	Stele/Pith_ZMA	111	6.75182	7.64463
15	UnknownB_OSA	108	6.56934	7.43802
16	Endodermal_Initials_ZMA	402	25.4753	31.187
16	Endodermis_OSA	77	4.87959	5.97362
16	Meristem_OSA	566	35.8682	43.91
16	Stele_ATH	244	15.4626	18.9294
17	Endodermis_ZMA	887	51.9017	56.246
17	Phloem_ATH	149	8.71855	9.44832
17	Phloem_OSA	541	31.6559	34.3056
18	Cortex_OSA	806	57.2443	65.1576
18	Stele_ATH	132	9.375	10.671
18	UnknownA_OSA	299	21.2358	24.1714
19	Exodermis_OSA	1155	94.7498	100
20	Endodermis_like_OSA	829	73.6234	85.3759
20	UnknownD_OSA	142	12.611	14.6241
21	Atrichoblast_ATH	138	12.7424	16.3121
21	Cortex_like_ZMA	48	4.43213	5.67376
21	Cortex_ZMA	165	15.2355	19.5035
21	EMC_OSA	103	9.51062	12.1749
21	Meristem_Endocortex_ATH	89	8.21791	10.5201
21	Stele_ATH	63	5.81717	7.44681
21	Stele_ZMA	45	4.15512	5.31915
21	Stele/Pith_ZMA	195	18.0055	23.0496
22	Phloem_ZMA	42	4.21687	5.29634
22	PutativeRootcap_OSA	67	6.72691	8.44893
22	Stele_ATH	88	8.83534	11.0971
22	Stele_ZMA	596	59.8394	75.1576
23	Xylem_ATH	195	21.4521	23.7515
23	Xylem_OSA	339	37.2937	41.2911
23	Xylem_ZMA	287	31.5732	34.9574
24	Endodermis_like_OSA	34	4.09639	4.82955
24	Stele_OSA	114	13.7349	16.1932
24	UnknownC_OSA	142	17.1084	20.1705
24	Xylem_like_OSA	414	49.8795	58.8068
25	Initials_ZMA	96	11.4695	13.0612
25	Meristem_OSA	451	53.8829	61.3605
25	QC_ZMA	128	15.2927	17.415
25	Root_cap_ATH	60	7.16846	8.16327
26	Meristem_OSA	39	6.54362	8.45987
26	Stele_ZMA	220	36.9128	47.7223
26	UnknownC_OSA	202	33.8926	43.8178
27	Cortex_like_OSA	42	7.35552	9.07127
27	Endodermal_Initials_ZMA	145	25.394	31.3175
27	Endodermis_OSA	102	17.8634	22.0302
27	Meristem_Endocortex_ATH	26	4.55342	5.61555
27	Stele/Pith_ZMA	148	25.9194	31.9654
28	Endodermis_ATH	50	9.96016	11.9904
28	Meristem_Endocortex_ATH	97	19.3227	23.2614
28	Stele/Pith_ZMA	98	19.5219	23.5012
28	UnknownD_OSA	172	34.2629	41.247
29	Meristem_OSA	93	79.4872	94.898
29	Stele_ZMA	5	4.2735	5.10204

## Sheet: Harmony_integration
Table S1: Harmony integration.
seurat_clusters	cellType	Freq	Percent	Percent_rescaled
0	Cortex_like_ZMA	362	6.21779	7.35772
0	EMC_OSA	559	9.60151	11.3618			Note: Percent_rescaled refers to the process of eliminating cell types that contribute less than 4% of the total
0	Endodermal_Initials_ZMA	784	13.4662	15.935			Note: in cellType column, OSA = Rice, ZMA = Maize, ATH = Arabidopsis
0	Endodermis_OSA	240	4.12229	4.87805
0	Meristem_OSA	327	5.61663	6.64634
0	Root_cap_ATH	254	4.36276	5.1626
0	Stele_ATH	322	5.53075	6.54472
0	Stele_OSA	288	4.94675	5.85366
0	Trichoblast_OSA	329	5.65098	6.68699
0	UnknownA_OSA	432	7.42013	8.78049
0	UnknownB_OSA	1023	17.5713	20.7927
1	EMC_OSA	481	8.99065	11.1188
1	Exodermis_OSA	283	5.28972	6.54184
1	Phloem_ZMA	769	14.3738	17.7762
1	Stele_ZMA	1368	25.5701	31.6227
1	Stele/Pith_ZMA	521	9.73832	12.0435
1	UnknownA_OSA	241	4.50467	5.57097
1	UnknownC_OSA	663	12.3925	15.3259
2	Atrichoblast_ATH	219	4.79737	6.3867
2	Cortex_like_OSA	346	7.57941	10.0904
2	Cortex_ZMA	1730	37.897	50.452
2	Endodermis_like_OSA	269	5.89266	7.84485
2	Stele_OSA	480	10.5148	13.9983
2	Stele/Pith_ZMA	194	4.24973	5.65763
2	UnknownA_OSA	191	4.18401	5.57014
3	Exodermis_OSA	2383	54.4437	62.7105
3	Meristem_Endocortex_ATH	969	22.1385	25.5
3	Stele/Pith_ZMA	256	5.84875	6.73684
3	UnknownD_OSA	192	4.38657	5.05263
4	Atrichoblast_OSA	377	11.8778	14.0567
4	EMC_OSA	756	23.8185	28.1879
4	Stele_ATH	369	11.6257	13.7584
4	Stele_ZMA	468	14.7448	17.4497
4	Stele/Pith_ZMA	525	16.5406	19.5749
4	Trichoblast_OSA	187	5.89162	6.97241
5	Trichoblast_ATH	845	26.9882	32.2519
5	Trichoblast_OSA	1775	56.6912	67.7481
6	Cortex_like_ZMA	486	17.1127	22.2731
6	Cortex_ZMA	298	10.493	13.6572
6	Endodermal_Initials_ZMA	435	15.3169	19.9358
6	Epidermis_ZMA	401	14.1197	18.3776
6	Meristem_OSA	562	19.7887	25.7562
7	Endodermal_Initials_ZMA	346	15.2962	17.974
7	Meristem_OSA	1309	57.8691	68
7	Stele_ATH	270	11.9363	14.026
8	Endodermis_ZMA	893	39.9195	44.9648
8	Meristem_OSA	215	9.61109	10.8258
8	Phloem_ATH	159	7.10773	8.00604
8	Phloem_OSA	552	24.6759	27.7946
8	UnknownC_OSA	167	7.46536	8.40886
9	Cortex_ATH	168	8.51495	8.80042
9	Cortex_like_OSA	200	10.1368	10.4767
9	Cortex_like_ZMA	200	10.1368	10.4767
9	Cortex_OSA	601	30.4612	31.4825
9	Cortex_ZMA	409	20.7299	21.4248
9	UnknownA_OSA	331	16.7765	17.3389
10	Endodermis_like_OSA	1040	51.1057	70.7965
10	Meristem_OSA	104	5.11057	7.07965
10	UnknownD_OSA	164	8.05897	11.1641
10	Xylem_like_OSA	161	7.91155	10.9598
11	Atrichoblast_ATH	342	16.8224	22.9069
11	Cortex_ZMA	483	23.758	32.351
11	EMC_OSA	92	4.52533	6.16209
11	PutativeRootcap_OSA	576	28.3325	38.58
12	Atrichoblast_ATH	192	13.9942	17.7285
12	Cortex_like_ZMA	145	10.5685	13.3887
12	Cortex_OSA	188	13.7026	17.3592
12	Endodermis_like_OSA	132	9.62099	12.1884
12	Root_cap_ATH	287	20.9184	26.5005
12	Stele_OSA	139	10.1312	12.8347
13	Cortex_OSA	670	51.8175	57.6592
13	Phloem_ZMA	54	4.17633	4.64716
13	Stele_ATH	106	8.19799	9.1222
13	UnknownA_OSA	332	25.6767	28.5714
14	Meristem_OSA	57	4.34451	4.91379
14	Pericycle_OSA	583	44.436	50.2586
14	Phloem_ZMA	103	7.85061	8.87931
14	Stele_ATH	285	21.7226	24.569
14	Stele_ZMA	132	10.061	11.3793
15	Endodermis_ATH	387	31.489	35.7011
15	Endodermis_OSA	469	38.1611	43.2657
15	Stele/Pith_ZMA	228	18.5517	21.0332
16	Atrichoblast_OSA	78	7.30337	8.96552
16	Cortex_Initials_ZMA	54	5.05618	6.2069
16	Cortex_ZMA	108	10.1124	12.4138
16	EMC_OSA	522	48.8764	60
16	Stele_ZMA	60	5.61798	6.89655
16	Trichoblast_ATH	48	4.49438	5.51724
17	Xylem_ATH	185	19.765	23.7179
17	Xylem_OSA	443	47.3291	56.7949
17	Xylem_ZMA	152	16.2393	19.4872
18	Initials_ZMA	95	11.323	13.1034
18	Meristem_OSA	448	53.3969	61.7931
18	QC_ZMA	124	14.7795	17.1034
18	Root_cap_ATH	58	6.91299	8
19	Stele_OSA	58	7.96703	9.58678
19	UnknownC_OSA	101	13.8736	16.6942
19	Xylem_ATH	50	6.86813	8.26446
19	Xylem_like_OSA	264	36.2637	43.6364
19	Xylem_ZMA	132	18.1319	21.8182
20	Atrichoblast_OSA	138	26.3862	27.4354
20	Cortex_ATH	189	36.1377	37.5746
20	Cortex_Initials_ZMA	85	16.2524	16.8986
20	EMC_OSA	25	4.78011	4.97018
20	Epidermis_ZMA	66	12.6195	13.1213
21	Stele_ZMA	304	71.5294	100
22	Cortex_ZMA	65	41.4013	45.4545
22	Endodermis_like_OSA	13	8.28025	9.09091
22	Stele/Pith_ZMA	23	14.6497	16.0839
22	Trichoblast_OSA	19	12.1019	13.2867
22	UnknownD_OSA	23	14.6497	16.0839
